# Supplementary material for: Microbiota modulate transcription in the intestinal epithelium without remodeling the accessible chromatin landscape
Source: HighWire-hosted journal article supplement (doi:10.1101/gr.165845.113), 2014-06-24
Supplement: Supplemental_TableS1.xlsx [file Supplemental_TableS1.xlsx]

## Sheet: Sequencing Summary
Table S1: DNase-seq and RNA-seq sample and sequencing summary
DNase-seq
Short ID	Long ID	Age	Mouse	Strain	Diet	Sex	Total Sequences	Aligned and post-filtered Sequences	Average insert length (bp)
CR-D1	CONVR_Duodenum_1	8 weeks	A	C57BL/6	Picolab diet 5058	Male	221430797	163461533	20
CR-D2	CONVR_Duodenum_2	12.5 weeks	B	C57BL/6	3500 autoclavable breeder chow	Male	209442096	162123512	20
CR-I1	CONVR_Ileum_1	8 weeks	A	C57BL/6	Picolab diet 5058	Male	199593023	143249947	20
CR-I2	CONVR_Ileum_4	12.5 weeks	B	C57BL/6	3500 autoclavable breeder chow	Male	221466221	167764050	20
CR-I3	CONVR_Ileum_2	12.5 weeks	C	C57BL/6	3500 autoclavable breeder chow	Male	215982024	170915232	20
CR-I4	CONVR_Ileum_3	12.5 weeks	D	C57BL/6	3500 autoclavable breeder chow	Male	231429528	171578335	20
GF-I1	GF_Ileum_1	10.5 weeks	E	C57BL/6	3500 autoclavable breeder chow	Male	224226689	177601958	20
GF-I2	GF_Ileum_2	12 weeks	F	C57BL/6	3500 autoclavable breeder chow	Male	220427835	178977955	20
GF-I3	GF_Ileum_3	12 weeks	G	C57BL/6	3500 autoclavable breeder chow	Male	197006992	157473089	20
CV-I1	CONVD_Ileum_1	10.5 weeks	H	C57BL/6	3500 autoclavable breeder chow	Male	63384943	49575564	20
CV-I2	CONVD_Ileum_2	12 weeks	I	C57BL/6	3500 autoclavable breeder chow	Male	62339459	49991736	20
CV-I3	CONVD_Ileum_3	12 weeks	J	C57BL/6	3500 autoclavable breeder chow	Male	64183681	51484819	20
CR-C1	CONVR_Colon_1	8 weeks	A	C57BL/6	Picolab diet 5058	Male	218778337	159390967	20
CR-C2	CONVR_Colon_2	12.5 weeks	B	C57BL/6	3500 autoclavable breeder chow	Male	208256019	165720903	20
CR-C3	CONVR_Colon_3	12.5 weeks	C	C57BL/6	3500 autoclavable breeder chow	Male	221534145	169482774	20
GF-C1	GF_Colon_1	10.5 weeks	E	C57BL/6	3500 autoclavable breeder chow	Male	223206325	166971217	20
GF-C2	GF_Colon_2	12 weeks	F	C57BL/6	3500 autoclavable breeder chow	Male	234300520	175605440	20
GF-C3	GF_Colon_3	12 weeks	G	C57BL/6	3500 autoclavable breeder chow	Male	241447501	173962830	20
CV-C1	CONVD_Colon_1	10.5 weeks	H	C57BL/6	3500 autoclavable breeder chow	Male	57562393	46273237	20
CV-C2	CONVD_Colon_2	12 weeks	I	C57BL/6	3500 autoclavable breeder chow	Male	65967879	50635940	20
CV-C3	CONVD_Colon_3	12 weeks	J	C57BL/6	3500 autoclavable breeder chow	Male	64668898	51249565	20
RNA-seq
Short ID	Long ID	Age	Mouse	Strain	Diet	Sex	Total Sequences (L+R reads)	Aligned and post-filtered Sequences	Read length (bp)
CR-I1	CONVR_Ileum_B1	8 weeks	A	C57BL/6	Picolab diet 5058	Male	87358524	79932634	50 x 2
CR-I2	CONVR_Ileum_B4	12.5 weeks	B	C57BL/6	3500 autoclavable breeder chow	Male	88864690	80898466	50 x 2
CR-I3	CONVR_Ileum_B2	12.5 weeks	C	C57BL/6	3500 autoclavable breeder chow	Male	109533574	100240541	50 x 2
CR-I4	CONVR_Ileum_B3	12.5 weeks	D	C57BL/6	3500 autoclavable breeder chow	Male	96886112	84800103	50 x 2
GF-I1	GF_Ileum_B1	10.5 weeks	E	C57BL/6	3500 autoclavable breeder chow	Male	37242196	32814791	50 x 2
GF-I2	GF_Ileum_B2	12 weeks	F	C57BL/6	3500 autoclavable breeder chow	Male	107725992	99952986	50 x 2
CV-I1	CONVD_Ileum_1	10.5 weeks	H	C57BL/6	3500 autoclavable breeder chow	Male	95839614	91979920	50 x 2
CV-I2	CONVD_Ileum_2	12 weeks	I	C57BL/6	3500 autoclavable breeder chow	Male	76450758	72984289	50 x 2
CV-I3	CONVD_Ileum_3	12 weeks	J	C57BL/6	3500 autoclavable breeder chow	Male	75652056	72512923	50 x 2
CR-C1	CONVR_Colon_B1	8 weeks	A	C57BL/6	Picolab diet 5058	Male	56368352	47957566	50 x 2
CR-C2	CONVR_Colon_B2	12.5 weeks	B	C57BL/6	3500 autoclavable breeder chow	Male	58558166	46531764	50 x 2
CR-C3	CONVR_Colon_B3	12.5 weeks	C	C57BL/6	3500 autoclavable breeder chow	Male	53514280	45425380	50 x 2
GF-C1	GF_Colon_B1	10.5 weeks	E	C57BL/6	3500 autoclavable breeder chow	Male	87764420	81273658	50 x 2
GF-C2	GF_Colon_B2	10.5 weeks	F	C57BL/6	3500 autoclavable breeder chow	Female	30060776	25054970	50 x 2
GF-C3	GF_Colon_B3	10.5 weeks	G	C57BL/6	3500 autoclavable breeder chow	Female	49209756	45172078	50 x 2
CV-C1	CONVD_Colon_1	10.5 weeks	H	C57BL/6	3500 autoclavable breeder chow	Male	78609408	57872932	50 x 2
CV-C2	CONVD_Colon_2	12 weeks	I	C57BL/6	3500 autoclavable breeder chow	Male	43703876	38527120	50 x 2
CV-C3	CONVD_Colon_3	12 weeks	J	C57BL/6	3500 autoclavable breeder chow	Male	73477796	66443261	50 x 2
