# Supplementary material for: Microbiota modulate transcription in the intestinal epithelium without remodeling the accessible chromatin landscape
Source: HighWire-hosted journal article supplement (doi:10.1101/gr.165845.113), 2014-06-24
Supplement: Supplemental_TableS2.xlsx [file Supplemental_TableS2.xlsx]

## Sheet: ileum.colon.differential.mRNA
Table S2: Differentially expressed genes and GO annotations between CR ileum and colon
test_id	gene	locus	sample_1	sample_2	status	value_1	value_2	log2.fold_change.	test_stat	p_value	q_value	significant
XLOC_001111	Hmcn1	chr1:152409631-152840565	CR_Ileum	CR_Colon	OK	0	0.964741	1.79769e+308	1.79769e+308	2.59956e-07	1.07232e-05	yes
XLOC_001378	-	chr1:55993416-55995624	CR_Ileum	CR_Colon	OK	0	0.848971	1.79769e+308	1.79769e+308	0.000521736	0.0087566	yes
XLOC_004146	Lpo	chr11:87619927-87639616	CR_Ileum	CR_Colon	OK	0	6.92021	1.79769e+308	1.79769e+308	7.98835e-07	2.98558e-05	yes
XLOC_004547	-	chr11:22636602-22637853	CR_Ileum	CR_Colon	OK	0	0.558421	1.79769e+308	1.79769e+308	0.00296345	0.0360731	yes
XLOC_006063	Akr1c18	chr13:4131872-4149877	CR_Ileum	CR_Colon	OK	0	0.743912	1.79769e+308	1.79769e+308	0.00283449	0.034838	yes
XLOC_006957	Scara5	chr14:66285239-66383663	CR_Ileum	CR_Colon	OK	0	0.39835	1.79769e+308	1.79769e+308	0.000493885	0.00836119	yes
XLOC_007304	Cma1	chr14:56560287-56563498	CR_Ileum	CR_Colon	OK	0	0.985543	1.79769e+308	1.79769e+308	0.00157715	0.0217208	yes
XLOC_009327	2310079G19Rik	chr16:88627032-88627911	CR_Ileum	CR_Colon	OK	0	0.789649	1.79769e+308	1.79769e+308	0.00274135	0.0339166	yes
XLOC_012696	Hoxd13	chr2:74505379-74509655	CR_Ileum	CR_Colon	OK	0	9.27829	1.79769e+308	1.79769e+308	2.79076e-07	1.1446e-05	yes
XLOC_012697	Hoxd12	chr2:74513086-74515762	CR_Ileum	CR_Colon	OK	0	0.344903	1.79769e+308	1.79769e+308	0.00140253	0.0197206	yes
XLOC_012699	Hoxd9	chr2:74535819-74538265	CR_Ileum	CR_Colon	OK	0	0.37773	1.79769e+308	1.79769e+308	0.00251764	0.0317537	yes
XLOC_014171	Defb45	chr2:152418926-152422221	CR_Ileum	CR_Colon	OK	0	2.64818	1.79769e+308	1.79769e+308	0.00258548	0.0323978	yes
XLOC_014549	-	chr2:152423891-152425332	CR_Ileum	CR_Colon	OK	0	1.27894	1.79769e+308	1.79769e+308	0.000664157	0.0107185	yes
XLOC_014599	Cdh4	chr2:179177182-179634080	CR_Ileum	CR_Colon	OK	0	0.841854	1.79769e+308	1.79769e+308	0.00117842	0.0171009	yes
XLOC_014976	Vtcn1	chr3:100629381-100700845	CR_Ileum	CR_Colon	OK	0	0.393941	1.79769e+308	1.79769e+308	0.00115906	0.0168784	yes
XLOC_015204	-	chr3:21691763-21699706	CR_Ileum	CR_Colon	OK	0	9.95244	1.79769e+308	1.79769e+308	0.000574134	0.0095025	yes
XLOC_015751	-	chr3:14728461-14728891	CR_Ileum	CR_Colon	OK	0	8.15272	1.79769e+308	1.79769e+308	0.000277749	0.00513411	yes
XLOC_015887	-	chr3:128707468-128708895	CR_Ileum	CR_Colon	OK	0	0.667969	1.79769e+308	1.79769e+308	0.0025842	0.032389	yes
XLOC_016982	Foxe3	chr4:114597074-114598618	CR_Ileum	CR_Colon	OK	0	0.469934	1.79769e+308	1.79769e+308	0.00269449	0.0334748	yes
XLOC_017875	Pf4	chr5:91201460-91202409	CR_Ileum	CR_Colon	OK	0	1.13233	1.79769e+308	1.79769e+308	0.00384311	0.0443329	yes
XLOC_017937	Ephx4	chr5:107832531-107859050	CR_Ileum	CR_Colon	OK	0	5.06875	1.79769e+308	1.79769e+308	2.09421e-05	0.000546701	yes
XLOC_019371	-	chr6:52205470-52222912	CR_Ileum	CR_Colon	OK	0	5.20612	1.79769e+308	1.79769e+308	0.000516732	0.00868576	yes
XLOC_019372	Evx1	chr6:52258382-52268372	CR_Ileum	CR_Colon	OK	0	1.10805	1.79769e+308	1.79769e+308	0.00171357	0.0232635	yes
XLOC_019634	Slc6a12	chr6:121296714-121315791	CR_Ileum	CR_Colon	OK	0	0.398902	1.79769e+308	1.79769e+308	0.00210355	0.0274797	yes
XLOC_020204	Fxyd4	chr6:117883561-117887686	CR_Ileum	CR_Colon	OK	0	28.1299	1.79769e+308	1.79769e+308	1.0922e-05	0.000307377	yes
XLOC_020458	-	chr6:52236390-52237424	CR_Ileum	CR_Colon	OK	0	0.693039	1.79769e+308	1.79769e+308	0.0038017	0.0439648	yes
XLOC_020459	-	chr6:52239351-52241446	CR_Ileum	CR_Colon	OK	0	0.409935	1.79769e+308	1.79769e+308	0.00269531	0.0334771	yes
XLOC_020545	-	chr6:134944108-134945382	CR_Ileum	CR_Colon	OK	0	0.444337	1.79769e+308	1.79769e+308	0.00405674	0.0462686	yes
XLOC_021021	Ntn5	chr7:52939783-52949924	CR_Ileum	CR_Colon	OK	0	0.429346	1.79769e+308	1.79769e+308	0.0021305	0.0277583	yes
XLOC_022604	-	chr7:144748804-144756291	CR_Ileum	CR_Colon	OK	0	0.799302	1.79769e+308	1.79769e+308	0.00155823	0.0215162	yes
XLOC_025479	Fbxw22	chr9:109280924-109306810	CR_Ileum	CR_Colon	OK	0	0.404835	1.79769e+308	1.79769e+308	0.00246106	0.0311924	yes
XLOC_025599	-	chr9:43802107-43804100	CR_Ileum	CR_Colon	OK	0	0.404659	1.79769e+308	1.79769e+308	0.00167962	0.0228753	yes
XLOC_000822	-	chr1:58942544-58947837	CR_Ileum	CR_Colon	OK	9.8361	0	-1.79769e+308	-1.79769e+308	0.00116406	0.0169375	yes
XLOC_003379	Gip	chr11:95885858-95892142	CR_Ileum	CR_Colon	OK	10.0958	0	-1.79769e+308	-1.79769e+308	0.00293646	0.035808	yes
XLOC_003470	G6pc	chr11:101222975-101239217	CR_Ileum	CR_Colon	OK	9.58295	0	-1.79769e+308	-1.79769e+308	0.000516949	0.00868836	yes
XLOC_007469	Slitrk6	chr14:111147154-111154371	CR_Ileum	CR_Colon	OK	2.30221	0	-1.79769e+308	-1.79769e+308	0.000132584	0.00273658	yes
XLOC_011435	-	chr18:74249042-74255992	CR_Ileum	CR_Colon	OK	0.617517	0	-1.79769e+308	-1.79769e+308	0.00109324	0.016109	yes
XLOC_011653	Dmrt3	chr19:25685026-25698411	CR_Ileum	CR_Colon	OK	0.864779	0	-1.79769e+308	-1.79769e+308	0.00339316	0.0401174	yes
XLOC_011806	Habp2	chr19:56362289-56464525	CR_Ileum	CR_Colon	OK	3.76288	0	-1.79769e+308	-1.79769e+308	0.00108462	0.0160053	yes
XLOC_013658	-	chr2:72449141-72453265	CR_Ileum	CR_Colon	OK	2.26568	0	-1.79769e+308	-1.79769e+308	0.000292966	0.00537424	yes
XLOC_015090	-	chr3:132292772-132310730	CR_Ileum	CR_Colon	OK	6.17805	0	-1.79769e+308	-1.79769e+308	0.00181364	0.0243918	yes
XLOC_015786	-	chr3:63188180-63191917	CR_Ileum	CR_Colon	OK	0.971355	0	-1.79769e+308	-1.79769e+308	0.00114287	0.0166919	yes
XLOC_018701	LOC433944	chr5:120135096-120141227	CR_Ileum	CR_Colon	OK	3.81505	0	-1.79769e+308	-1.79769e+308	0.000592469	0.00976014	yes
XLOC_020424	-	chr6:24277443-24280686	CR_Ileum	CR_Colon	OK	0.410666	0	-1.79769e+308	-1.79769e+308	0.00367263	0.0427885	yes
XLOC_020815	Cyp2b10	chr7:26682682-26711643	CR_Ileum	CR_Colon	OK	6.98252	0	-1.79769e+308	-1.79769e+308	0.00386935	0.0445662	yes
XLOC_021567	Fgf15	chr7:152082436-152086856	CR_Ileum	CR_Colon	OK	26.8459	0	-1.79769e+308	-1.79769e+308	0.000141769	0.00289761	yes
XLOC_022973	Defa-rs7	chr8:22194718-22195696	CR_Ileum	CR_Colon	OK	39.1374	0	-1.79769e+308	-1.79769e+308	5.30812e-05	0.00123569	yes
XLOC_022978	Defa-rs7	chr8:22331251-22332229	CR_Ileum	CR_Colon	OK	40.2324	0	-1.79769e+308	-1.79769e+308	4.72599e-05	0.0011168	yes
XLOC_022981	Defa3	chr8:22427087-22428056	CR_Ileum	CR_Colon	OK	66.3308	0	-1.79769e+308	-1.79769e+308	7.77094e-06	0.000227786	yes
XLOC_022989	Defa17	chr8:22766238-22767208	CR_Ileum	CR_Colon	OK	132.883	0	-1.79769e+308	-1.79769e+308	1.34098e-06	4.75153e-05	yes
XLOC_023567	-	chr8:22368251-22371770	CR_Ileum	CR_Colon	OK	2.00041	0	-1.79769e+308	-1.79769e+308	0.00040071	0.00699986	yes
XLOC_023568	Defa-rs1	chr8:22465566-22466699	CR_Ileum	CR_Colon	OK	36.6281	0	-1.79769e+308	-1.79769e+308	2.66931e-05	0.000678417	yes
XLOC_024063	-	chr8:22484709-22485820	CR_Ileum	CR_Colon	OK	3.02321	0	-1.79769e+308	-1.79769e+308	0.00165282	0.0225711	yes
XLOC_026770	-	chrX:50818806-50823772	CR_Ileum	CR_Colon	OK	0.372538	0	-1.79769e+308	-1.79769e+308	0.00343832	0.04056	yes
XLOC_026800	-	chrX:121302012-121302921	CR_Ileum	CR_Colon	OK	1.97679	0	-1.79769e+308	-1.79769e+308	0.00363274	0.0424015	yes
XLOC_021400	Aqp8	chr7:130605807-130611517	CR_Ileum	CR_Colon	OK	0.00829138	133.365	13.9734	-2.8887	0.00386841	0.0445623	yes
XLOC_013031	Tgm3	chr2:129838064-129876135	CR_Ileum	CR_Colon	OK	0.0164049	148.093	13.1401	-11.001	0	0	yes
XLOC_019968	Hoxa10,Hoxa9	chr6:52173025-52190853	CR_Ileum	CR_Colon	OK	0.00909962	53.7142	12.5272	-3.11533	0.00183738	0.0246371	yes
XLOC_007720	Nov	chr15:54577482-54585316	CR_Ileum	CR_Colon	OK	0.0133776	71.4063	12.382	-8.79659	0	0	yes
XLOC_015188	Car1	chr3:14766213-14808365	CR_Ileum	CR_Colon	OK	0.880325	2726.84	11.5969	-4.55097	5.33984e-06	0.000163742	yes
XLOC_006422	Thbs4	chr13:93521537-93564773	CR_Ileum	CR_Colon	OK	0.0386419	83.1453	11.0713	-7.21089	5.55778e-13	5.81788e-11	yes
XLOC_004199	Hoxb13	chr11:96055674-96070456	CR_Ileum	CR_Colon	OK	0.0024425	4.57724	10.8719	-4.35108	1.35469e-05	0.000371597	yes
XLOC_007874	Cyp2d9	chr15:82282806-82472494	CR_Ileum	CR_Colon	OK	0.012424	20.9917	10.7225	-2.98739	0.00281368	0.0346418	yes
XLOC_016679	Fut9	chr4:25536479-25727150	CR_Ileum	CR_Colon	OK	0.000577227	0.955605	10.6931	-3.78462	0.000153945	0.00310961	yes
XLOC_025167	Fam55b	chr9:48126086-48148981	CR_Ileum	CR_Colon	OK	0.0234259	36.7689	10.6162	-10.0381	0	0	yes
XLOC_006911	Atp12a	chr14:56983686-57007388	CR_Ileum	CR_Colon	OK	0.0207493	25.5181	10.2642	-9.50389	0	0	yes
XLOC_002500	-	chr10:110511048-110530032	CR_Ileum	CR_Colon	OK	0.00296138	3.43258	10.1788	-4.804	1.55529e-06	5.43459e-05	yes
XLOC_020857	Sycn	chr7:29325876-29334911	CR_Ileum	CR_Colon	OK	0.995979	918.934	9.84963	-8.89668	0	0	yes
XLOC_019343	AI854703	chr6:48576434-48583737	CR_Ileum	CR_Colon	OK	0.0259327	22.4739	9.75926	-7.09429	1.30029e-12	1.28829e-10	yes
XLOC_016938	Insl5	chr4:102690477-102699333	CR_Ileum	CR_Colon	OK	0.0421437	35.5762	9.72138	-5.63243	1.77691e-08	9.28502e-07	yes
XLOC_016981	Foxd2	chr4:114578162-114594557	CR_Ileum	CR_Colon	OK	0.0306947	22.6273	9.52586	-4.26943	1.95972e-05	0.000516141	yes
XLOC_003307	Expi	chr11:83522505-83524862	CR_Ileum	CR_Colon	OK	0.0144793	8.55415	9.20649	-2.90821	0.00363505	0.0424174	yes
XLOC_014630	Car2	chr3:14886298-14900770	CR_Ileum	CR_Colon	OK	0.897209	449.796	8.96961	-12.2045	0	0	yes
XLOC_008304	Cyp2d34	chr15:82282806-82472494	CR_Ileum	CR_Colon	OK	0.244775	116.883	8.8994	-5.78466	7.26578e-09	4.08183e-07	yes
XLOC_023813	Best2	chr8:87531099-87538307	CR_Ileum	CR_Colon	OK	0.0374639	17.5633	8.87285	-7.58156	3.41949e-14	4.2222e-12	yes
XLOC_000085	Il1r1	chr1:40281924-40373039	CR_Ileum	CR_Colon	OK	0.00990149	4.43097	8.80576	-7.35729	1.87628e-13	2.11778e-11	yes
XLOC_001744	Slc16a9	chr10:69708023-69748720	CR_Ileum	CR_Colon	OK	0.00910898	4.06003	8.79998	-5.06926	3.9937e-07	1.5904e-05	yes
XLOC_016199	Ror1	chr4:99768311-100117370	CR_Ileum	CR_Colon	OK	0.00250418	1.0344	8.69024	-3.15143	0.0016247	0.0222529	yes
XLOC_000379	Ctse	chr1:133534890-133572084	CR_Ileum	CR_Colon	OK	0.0525799	20.5335	8.60925	-9.75162	0	0	yes
XLOC_025076	Slc37a2	chr9:37032345-37063323	CR_Ileum	CR_Colon	OK	0.0808021	30.844	8.57638	-7.81646	5.32907e-15	7.40771e-13	yes
XLOC_005067	Meg3,Mir1906-1,Mir770	chr12:110779187-110809939	CR_Ileum	CR_Colon	OK	0.0828945	31.6413	8.57632	-6.08395	1.17254e-09	7.44165e-08	yes
XLOC_013401	Itih2	chr2:10016217-10052310	CR_Ileum	CR_Colon	OK	0.00444371	1.6945	8.57488	-4.32291	1.53982e-05	0.000416971	yes
XLOC_004507	Cbr2	chr11:120590798-120593335	CR_Ileum	CR_Colon	OK	0.0535412	19.9963	8.54487	-6.09918	1.06615e-09	6.81705e-08	yes
XLOC_016273	9130206I24Rik	chr4:114578162-114594557	CR_Ileum	CR_Colon	OK	0.0658503	24.313	8.52832	-7.23135	4.78284e-13	5.06395e-11	yes
XLOC_016978	Gm12824	chr4:114079328-114361434	CR_Ileum	CR_Colon	OK	0.0089987	3.15175	8.45222	-3.37772	0.000730906	0.0116002	yes
XLOC_013610	Rprm	chr2:53936503-53937963	CR_Ileum	CR_Colon	OK	0.0062298	1.91829	8.26642	-3.01069	0.00260657	0.0325972	yes
XLOC_005342	-	chr12:78230095-78292710	CR_Ileum	CR_Colon	OK	0.0134696	4.0721	8.23993	-4.88686	1.02455e-06	3.72968e-05	yes
XLOC_022516	Sult1a1	chr7:133792044-133821638	CR_Ileum	CR_Colon	OK	0.786138	233.507	8.21447	-6.58997	4.39917e-11	3.49872e-09	yes
XLOC_012023	Anxa1	chr19:20447923-20465161	CR_Ileum	CR_Colon	OK	0.213938	63.5004	8.21343	-11.8709	0	0	yes
XLOC_008988	B3galt5	chr16:96457407-96541465	CR_Ileum	CR_Colon	OK	0.290639	80.6512	8.11632	-12.5209	0	0	yes
XLOC_019228	Tspan33	chr6:29644051-29669624	CR_Ileum	CR_Colon	OK	0.0439177	11.4573	8.02725	-8.12573	4.44089e-16	6.97145e-14	yes
XLOC_021389	Scnn1b	chr7:129008571-129062144	CR_Ileum	CR_Colon	OK	0.00853779	2.19111	8.00358	-3.04384	0.0023358	0.0299016	yes
XLOC_013258	Wfdc2	chr2:164388215-164394006	CR_Ileum	CR_Colon	OK	1.3562	284.846	7.71447	-11.705	0	0	yes
XLOC_016347	Nt5c1a	chr4:122878712-122899612	CR_Ileum	CR_Colon	OK	0.00389175	0.763931	7.61688	-4.12241	3.74932e-05	0.000912103	yes
XLOC_005081	AF357359,Rian	chr12:110842154-110899921	CR_Ileum	CR_Colon	OK	0.054273	10.2988	7.56803	-5.32432	1.0133e-07	4.54992e-06	yes
XLOC_000585	1810030J14Rik	chr1:176260648-176263008	CR_Ileum	CR_Colon	OK	16.6443	3028.06	7.50722	-9.52185	0	0	yes
XLOC_001687	Gja1	chr10:56097105-56110225	CR_Ileum	CR_Colon	OK	0.00721302	1.26764	7.45733	-4.47658	7.58494e-06	0.00022307	yes
XLOC_010415	Crisp3	chr17:40358725-40379207	CR_Ileum	CR_Colon	OK	0.0108588	1.89919	7.45038	-3.60579	0.000311201	0.00565922	yes
XLOC_016387	-	chr4:128594526-128603813	CR_Ileum	CR_Colon	OK	0.0151659	2.59456	7.41851	-6.08327	1.17759e-09	7.46942e-08	yes
XLOC_024504	1600029D21Rik	chr9:50296903-50319398	CR_Ileum	CR_Colon	OK	0.20213	32.7016	7.33793	-8.82731	0	0	yes
XLOC_006789	Anxa8	chr14:34899175-34913754	CR_Ileum	CR_Colon	OK	0.0864042	13.8218	7.32163	-8.87465	0	0	yes
XLOC_024493	Fam55d	chr9:48170123-48208108	CR_Ileum	CR_Colon	OK	0.108037	17.1872	7.31366	-7.33837	2.16271e-13	2.42018e-11	yes
XLOC_008886	Retnlb	chr16:48816968-48819005	CR_Ileum	CR_Colon	OK	2.01497	303.145	7.2331	-7.79778	6.21725e-15	8.56196e-13	yes
XLOC_019450	Gm15401	chr6:72576373-72738950	CR_Ileum	CR_Colon	OK	0.478252	71.4511	7.22304	-6.74521	1.52807e-11	1.29159e-09	yes
XLOC_015323	1110032A04Rik	chr3:69623460-69667690	CR_Ileum	CR_Colon	OK	0.224778	30.2655	7.07303	-4.24729	2.16369e-05	0.000563187	yes
XLOC_020826	Cyp2f2	chr7:27904973-27918679	CR_Ileum	CR_Colon	OK	0.0553398	6.85822	6.95337	-7.44038	1.00364e-13	1.1709e-11	yes
XLOC_000422	Tnni1	chr1:137695997-137707566	CR_Ileum	CR_Colon	OK	0.343744	40.3175	6.87393	-9.69796	0	0	yes
XLOC_009473	-	chr16:92146367-92149793	CR_Ileum	CR_Colon	OK	0.0055732	0.650201	6.86624	-3.87498	0.000106632	0.00226339	yes
XLOC_019015	-	chr5:64439021-64442037	CR_Ileum	CR_Colon	OK	0.00382947	0.439992	6.84419	-3.01632	0.00255863	0.0321411	yes
XLOC_019301	Sval1	chr6:41901626-41906097	CR_Ileum	CR_Colon	OK	2.62867	300.083	6.83488	-11.3606	0	0	yes
XLOC_018163	Azgp1	chr5:138422748-138431460	CR_Ileum	CR_Colon	OK	0.0227209	2.51581	6.79086	-4.19581	2.71899e-05	0.000689152	yes
XLOC_020045	Tcf7l1	chr6:72576373-72738950	CR_Ileum	CR_Colon	OK	0.166516	18.422	6.78962	-7.22635	4.96048e-13	5.24203e-11	yes
XLOC_008976	Cbr3	chr16:93683463-93691236	CR_Ileum	CR_Colon	OK	0.333107	36.2613	6.7663	-7.89559	2.88658e-15	4.15015e-13	yes
XLOC_002150	Ahi1	chr10:20672352-20811827	CR_Ileum	CR_Colon	OK	0.00987302	1.06581	6.75424	-2.86748	0.00413749	0.0469702	yes
XLOC_010032	Plekhh2	chr17:84911234-85021482	CR_Ileum	CR_Colon	OK	0.00422257	0.448087	6.72952	-2.89621	0.00377701	0.0437248	yes
XLOC_015754	Agtr1b	chr3:20207709-20213280	CR_Ileum	CR_Colon	OK	0.0115461	1.20928	6.7106	-6.25005	4.1031e-10	2.78468e-08	yes
XLOC_003306	Gm11428	chr11:83517557-83519771	CR_Ileum	CR_Colon	OK	0.0433004	4.3943	6.66511	-3.1603	0.00157606	0.0217111	yes
XLOC_015525	Hao2	chr3:98678441-98699300	CR_Ileum	CR_Colon	OK	2.15425	216.454	6.65073	-10.7635	0	0	yes
XLOC_016306	-	chr4:116817104-116821595	CR_Ileum	CR_Colon	OK	0.00926529	0.896816	6.59683	-3.37084	0.000749396	0.0118446	yes
XLOC_012561	St6galnac4,St6galnac6	chr2:32442601-32476324	CR_Ileum	CR_Colon	OK	3.03037	284.4	6.55228	-9.97121	0	0	yes
XLOC_022300	Olfr560,Olfr78	chr7:109889234-109907985	CR_Ileum	CR_Colon	OK	0.0223917	2.0772	6.53553	-3.52283	0.000426969	0.00738366	yes
XLOC_003382	-	chr11:96038855-96042279	CR_Ileum	CR_Colon	OK	0.00748898	0.656766	6.45447	-3.84642	0.000119856	0.00250599	yes
XLOC_002137	-	chr10:17241294-17248193	CR_Ileum	CR_Colon	OK	0.0195432	1.70126	6.4438	-4.56559	4.9809e-06	0.000154053	yes
XLOC_021552	Syt8	chr7:149620869-149626303	CR_Ileum	CR_Colon	OK	0.0191007	1.65073	6.43334	-3.12658	0.0017685	0.0238924	yes
XLOC_024517	Arhgap20	chr9:51573455-51683990	CR_Ileum	CR_Colon	OK	0.0302735	2.57194	6.40866	-5.53127	3.1792e-08	1.58661e-06	yes
XLOC_019419	Tnip3	chr6:65527069-65601410	CR_Ileum	CR_Colon	OK	0.0370863	3.07909	6.37548	-6.01432	1.80648e-09	1.11527e-07	yes
XLOC_003381	Ttll6	chr11:95985905-96026844	CR_Ileum	CR_Colon	OK	0.346615	27.5131	6.31064	-6.98374	2.87415e-12	2.69952e-10	yes
XLOC_015877	-	chr3:121253679-121257311	CR_Ileum	CR_Colon	OK	0.014838	1.15567	6.2833	-5.65379	1.5695e-08	8.2949e-07	yes
XLOC_015645	Ugt8a	chr3:125568260-125641468	CR_Ileum	CR_Colon	OK	0.00675996	0.523536	6.27513	-3.83578	0.000125164	0.0026018	yes
XLOC_014837	Muc1	chr3:89032536-89037291	CR_Ileum	CR_Colon	OK	0.0414522	3.08974	6.21989	-6.11593	9.59958e-10	6.17718e-08	yes
XLOC_015408	Trim46	chr3:89038098-89049819	CR_Ileum	CR_Colon	OK	0.190373	13.9994	6.2004	-4.20812	2.57505e-05	0.00065747	yes
XLOC_008182	Ly6i	chr15:74810241-74813860	CR_Ileum	CR_Colon	OK	0.0800354	5.74984	6.16674	-5.05944	4.20479e-07	1.66669e-05	yes
XLOC_003748	Stc2	chr11:31257849-31271373	CR_Ileum	CR_Colon	OK	0.129412	9.22051	6.15481	-5.32067	1.03387e-07	4.63297e-06	yes
XLOC_019966	Hoxa3,Hoxa5,Hoxa6,Hoxa7	chr6:52119060-52172148	CR_Ileum	CR_Colon	OK	0.442576	31.3552	6.14663	-4.43978	9.00521e-06	0.000259397	yes
XLOC_007615	-	chr14:105990314-105992515	CR_Ileum	CR_Colon	OK	0.00649499	0.454591	6.1291	-2.94927	0.00318527	0.0381592	yes
XLOC_022603	-	chr7:144660797-144670995	CR_Ileum	CR_Colon	OK	0.0222003	1.52369	6.10084	-8.23034	2.22045e-16	3.57154e-14	yes
XLOC_007026	Pcdh17	chr14:84843369-84936867	CR_Ileum	CR_Colon	OK	0.0117114	0.783697	6.06431	-6.66236	2.69464e-11	2.20628e-09	yes
XLOC_021160	Odz4	chr7:103359146-104059590	CR_Ileum	CR_Colon	OK	0.0166039	1.08699	6.03268	-4.20059	2.66223e-05	0.000676849	yes
XLOC_014246	Rims4	chr2:163685522-163744729	CR_Ileum	CR_Colon	OK	0.0479861	2.93897	5.93655	-3.56055	0.00037008	0.0065482	yes
XLOC_006936	-	chr14:63174590-63227369	CR_Ileum	CR_Colon	OK	0.0356268	2.16406	5.92463	-3.9976	6.39872e-05	0.00145407	yes
XLOC_019297	Ephb6	chr6:41555480-41570506	CR_Ileum	CR_Colon	OK	0.0252263	1.43506	5.83004	-5.37736	7.55844e-08	3.47683e-06	yes
XLOC_007929	-	chr15:96671482-96675582	CR_Ileum	CR_Colon	OK	0.0164243	0.932421	5.82708	-3.91727	8.95591e-05	0.00194428	yes
XLOC_007969	AB099516,Higd1c,Mettl7a2	chr15:100183630-100214866	CR_Ileum	CR_Colon	OK	0.105689	5.99131	5.82498	-6.04505	1.49365e-09	9.34608e-08	yes
XLOC_000386	Slc45a3	chr1:133859542-133879770	CR_Ileum	CR_Colon	OK	0.206081	11.6451	5.82037	-4.83102	1.35837e-06	4.80701e-05	yes
XLOC_025665	-	chr9:85225980-85229413	CR_Ileum	CR_Colon	OK	0.0174138	0.968452	5.79738	-5.39274	6.93913e-08	3.2166e-06	yes
XLOC_017793	-	chr5:64986589-64992113	CR_Ileum	CR_Colon	OK	0.0186107	1.01762	5.77292	-4.2446	2.18982e-05	0.000569187	yes
XLOC_009256	Col8a1	chr16:57624368-57754850	CR_Ileum	CR_Colon	OK	0.0559536	3.04418	5.76568	-7.61565	2.62013e-14	3.30876e-12	yes
XLOC_015745	-	chr3:9288217-9290584	CR_Ileum	CR_Colon	OK	0.00912297	0.454678	5.6392	-3.29893	0.000970542	0.0146141	yes
XLOC_016269	Gm12824	chr4:114079328-114361434	CR_Ileum	CR_Colon	OK	0.00702389	0.347844	5.63003	-3.54802	0.000388145	0.00681842	yes
XLOC_008165	Gpr20	chr15:73518953-73537935	CR_Ileum	CR_Colon	OK	0.13299	6.54537	5.62108	-6.21093	5.26711e-10	3.52088e-08	yes
XLOC_007038	Scel	chr14:103912557-104012563	CR_Ileum	CR_Colon	OK	0.0195025	0.951744	5.60884	-4.03838	5.38206e-05	0.00125186	yes
XLOC_011629	Gna14	chr19:16510156-16685308	CR_Ileum	CR_Colon	OK	0.263035	12.8308	5.60821	-8.2413	2.22045e-16	3.57154e-14	yes
XLOC_007919	Lrrk2	chr15:91503654-91646555	CR_Ileum	CR_Colon	OK	0.0222058	1.07885	5.60241	-6.49329	8.39844e-11	6.36925e-09	yes
XLOC_025256	Thsd4	chr9:59814737-60369893	CR_Ileum	CR_Colon	OK	0.0440294	2.12836	5.59513	-4.92278	8.53234e-07	3.16357e-05	yes
XLOC_015969	Ggh	chr4:19969198-19993258	CR_Ileum	CR_Colon	OK	2.51264	121.218	5.59226	-10.3138	0	0	yes
XLOC_001132	-	chr1:157274017-157285615	CR_Ileum	CR_Colon	OK	0.0911413	4.28789	5.55602	-6.17803	6.49054e-10	4.27058e-08	yes
XLOC_007806	Apol6	chr15:76845916-76887785	CR_Ileum	CR_Colon	OK	0.109683	5.09733	5.53833	-5.85645	4.72876e-09	2.73187e-07	yes
XLOC_022453	Galntl4	chr7:118615174-118923491	CR_Ileum	CR_Colon	OK	0.00761132	0.346091	5.50686	-3.1512	0.00162603	0.0222683	yes
XLOC_003691	Nacad	chr11:6497825-6506057	CR_Ileum	CR_Colon	OK	0.0283876	1.29078	5.50684	-6.49053	8.55365e-11	6.4737e-09	yes
XLOC_008970	Kcne2	chr16:92292633-92298378	CR_Ileum	CR_Colon	OK	0.0160972	0.700544	5.4436	-3.35981	0.000779958	0.0122276	yes
XLOC_008870	-	chr16:44662769-44665694	CR_Ileum	CR_Colon	OK	0.142818	6.10176	5.41698	-4.01211	6.01786e-05	0.0013798	yes
XLOC_010264	Cbs	chr17:31749588-31774086	CR_Ileum	CR_Colon	OK	0.667675	27.694	5.37428	-5.93906	2.86663e-09	1.71867e-07	yes
XLOC_021352	Far1	chr7:120657132-120715025	CR_Ileum	CR_Colon	OK	0.812062	33.5949	5.37051	-7.05883	1.6791e-12	1.63016e-10	yes
XLOC_007336	Gm4902	chr14:59939798-59960203	CR_Ileum	CR_Colon	OK	0.118805	4.81696	5.34145	-2.90088	0.00372122	0.0432159	yes
XLOC_009248	Tmem45a	chr16:56805273-56886276	CR_Ileum	CR_Colon	OK	0.00865493	0.344558	5.31508	-3.1706	0.00152127	0.0210779	yes
XLOC_023945	Fa2h	chr8:113869037-113917721	CR_Ileum	CR_Colon	OK	1.30537	50.5146	5.27417	-7.40536	1.30784e-13	1.50213e-11	yes
XLOC_019192	Cav2	chr6:17231340-17239011	CR_Ileum	CR_Colon	OK	0.0443252	1.70859	5.26854	-5.65722	1.53846e-08	8.14638e-07	yes
XLOC_020795	BC049730	chr7:25494277-25499554	CR_Ileum	CR_Colon	OK	0.0208596	0.79085	5.24462	-3.12316	0.00178921	0.0241223	yes
XLOC_014619	Zbtb10	chr3:9250566-9285332	CR_Ileum	CR_Colon	OK	0.0820917	3.08741	5.23302	-7.40828	1.27898e-13	1.47126e-11	yes
XLOC_001303	Mark1	chr1:186720302-186823428	CR_Ileum	CR_Colon	OK	0.0105424	0.392998	5.22025	-3.48243	0.000496879	0.00840483	yes
XLOC_008303	Cyp2d10	chr15:82233275-82237624	CR_Ileum	CR_Colon	OK	0.250701	9.32416	5.21694	-7.63138	2.33147e-14	2.96956e-12	yes
XLOC_015923	-	chr3:146353381-146355961	CR_Ileum	CR_Colon	OK	0.00979332	0.360435	5.2018	-3.28419	0.00102277	0.0152528	yes
XLOC_017602	Steap4	chr5:7960471-7982213	CR_Ileum	CR_Colon	OK	0.0191075	0.702112	5.19949	-4.54711	5.43885e-06	0.00016641	yes
XLOC_003896	Rasd1	chr11:59761715-59778576	CR_Ileum	CR_Colon	OK	0.602694	21.707	5.17059	-3.36111	0.000776302	0.0121832	yes
XLOC_007183	2610528A11Rik	chr14:37915325-37923287	CR_Ileum	CR_Colon	OK	11.2303	403.629	5.16757	-10.9219	0	0	yes
XLOC_018296	Speer4e	chr5:14933630-14938475	CR_Ileum	CR_Colon	OK	0.0174168	0.621222	5.15656	-2.88263	0.00394373	0.0452407	yes
XLOC_008183	Ly6a,Ly6c1	chr15:74825304-74879281	CR_Ileum	CR_Colon	OK	4.93348	174.213	5.14211	-7.03833	1.94555e-12	1.8644e-10	yes
XLOC_026030	Stard8	chrX:96237919-96270067	CR_Ileum	CR_Colon	OK	0.0184622	0.650206	5.13825	-4.54897	5.39089e-06	0.000165125	yes
XLOC_019965	Hoxa2	chr6:52108435-52114830	CR_Ileum	CR_Colon	OK	0.100042	3.48862	5.12397	-3.66396	0.000248342	0.00467164	yes
XLOC_016890	Ptplad2	chr4:88058157-88084830	CR_Ileum	CR_Colon	OK	0.0104303	0.361319	5.11442	-3.05976	0.00221512	0.0286674	yes
XLOC_003007	1810065E05Rik	chr11:58234612-58239525	CR_Ileum	CR_Colon	OK	16.1552	555.893	5.10474	-11.0332	0	0	yes
XLOC_019827	Cttnbp2	chr6:18316476-18464825	CR_Ileum	CR_Colon	OK	0.251798	8.66392	5.10468	-6.04947	1.45324e-09	9.11377e-08	yes
XLOC_014968	Hmgcs2	chr3:98083631-98116564	CR_Ileum	CR_Colon	OK	6.91477	237.445	5.10177	-9.92737	0	0	yes
XLOC_013433	Hnmt	chr2:23858431-23904899	CR_Ileum	CR_Colon	OK	0.0210749	0.719945	5.09429	-3.54179	0.000397421	0.00694951	yes
XLOC_018758	Scarb1	chr5:125757456-125821464	CR_Ileum	CR_Colon	OK	0.227078	7.54274	5.05383	-4.762	1.91688e-06	6.55479e-05	yes
XLOC_011140	Aqp4	chr18:15547898-15562193	CR_Ileum	CR_Colon	OK	2.45415	80.6283	5.03799	-10.7198	0	0	yes
XLOC_013897	Ldlrad3	chr2:101790357-102026534	CR_Ileum	CR_Colon	OK	0.238009	7.75669	5.02635	-6.55621	5.51934e-11	4.32457e-09	yes
XLOC_003761	Ranbp17	chr11:33111793-33413746	CR_Ileum	CR_Colon	OK	0.0100308	0.326004	5.02239	-4.02812	5.62258e-05	0.00129855	yes
XLOC_026118	Tmem35	chrX:130829763-130840508	CR_Ileum	CR_Colon	OK	0.0671079	2.15243	5.00334	-5.42053	5.94219e-08	2.80124e-06	yes
XLOC_015481	Bnipl	chr3:95045182-95055115	CR_Ileum	CR_Colon	OK	0.124414	3.94092	4.98531	-5.84498	5.06639e-09	2.91428e-07	yes
XLOC_010598	Slc8a1	chr17:81772236-82188766	CR_Ileum	CR_Colon	OK	0.115381	3.6447	4.98133	-3.11045	0.00186804	0.0249474	yes
XLOC_005303	5830428M24Rik	chr12:70565773-70576537	CR_Ileum	CR_Colon	OK	0.134314	4.18858	4.96278	-4.514	6.36172e-06	0.00019099	yes
XLOC_012184	Afap1l2	chr19:56986843-57083065	CR_Ileum	CR_Colon	OK	0.0235192	0.718937	4.93395	-4.45676	8.32091e-06	0.00024196	yes
XLOC_012445	Il1rn	chr2:24192379-24207011	CR_Ileum	CR_Colon	OK	0.649536	19.5501	4.91162	-8.16207	2.22045e-16	3.57154e-14	yes
XLOC_001472	-	chr1:137688136-137691803	CR_Ileum	CR_Colon	OK	0.0111815	0.333998	4.90065	-3.86824	0.000109622	0.00231644	yes
XLOC_004319	Etv4	chr11:101630928-101646652	CR_Ileum	CR_Colon	OK	0.305212	8.82282	4.85336	-4.13216	3.59367e-05	0.000879729	yes
XLOC_016127	Zfp618	chr4:62626553-62800741	CR_Ileum	CR_Colon	OK	0.144594	4.16048	4.84667	-5.2947	1.19212e-07	5.28029e-06	yes
XLOC_011112	Mkx	chr18:6934498-7004777	CR_Ileum	CR_Colon	OK	0.119595	3.43397	4.84365	-6.34687	2.19746e-10	1.56056e-08	yes
XLOC_000162	Nrp2	chr1:62749325-62865266	CR_Ileum	CR_Colon	OK	0.233223	6.60465	4.8237	-4.10471	4.04815e-05	0.000976564	yes
XLOC_016391	Fndc5	chr4:128814058-128821837	CR_Ileum	CR_Colon	OK	0.138739	3.90885	4.8163	-6.58264	4.62175e-11	3.66132e-09	yes
XLOC_003449	Ttc25	chr11:100406945-100433880	CR_Ileum	CR_Colon	OK	0.0204882	0.568327	4.79386	-4.09083	4.29838e-05	0.00102877	yes
XLOC_008445	Cela1	chr15:100504852-100518351	CR_Ileum	CR_Colon	OK	6.97994	193.382	4.7921	-7.12354	1.05183e-12	1.05435e-10	yes
XLOC_019250	Akr1b8	chr6:34304163-34318454	CR_Ileum	CR_Colon	OK	2.15384	59.3658	4.78465	-8.27315	2.22045e-16	3.57154e-14	yes
XLOC_004198	-	chr11:96042446-96048312	CR_Ileum	CR_Colon	OK	0.013151	0.356778	4.76178	-3.11421	0.00184437	0.0247085	yes
XLOC_006416	Ckmt2	chr13:91992953-92016618	CR_Ileum	CR_Colon	OK	0.131458	3.55434	4.75691	-3.72658	0.000194098	0.00379102	yes
XLOC_007968	Gm10035	chr15:100165359-100170600	CR_Ileum	CR_Colon	OK	0.117683	3.17923	4.7557	-5.21287	1.85944e-07	7.92781e-06	yes
XLOC_022374	Prkcdbp	chr7:112629129-112630711	CR_Ileum	CR_Colon	OK	0.052154	1.38903	4.73515	-3.78369	0.000154519	0.00311991	yes
XLOC_021934	Hpn	chr7:31883743-31900309	CR_Ileum	CR_Colon	OK	0.224343	5.97449	4.73504	-4.01974	5.82625e-05	0.00134141	yes
XLOC_007182	Cdhr1	chr14:37891034-37911497	CR_Ileum	CR_Colon	OK	0.064043	1.70356	4.73337	-6.1965	5.77341e-10	3.83509e-08	yes
XLOC_020380	Ldhb	chr6:142438768-142456463	CR_Ileum	CR_Colon	OK	0.201877	5.34282	4.72605	-3.35058	0.000806429	0.0125637	yes
XLOC_000086	Il1rl2	chr1:40381360-40424592	CR_Ileum	CR_Colon	OK	0.0314617	0.831856	4.72467	-4.76102	1.92619e-06	6.58458e-05	yes
XLOC_016789	Grin3a	chr4:49674493-49858621	CR_Ileum	CR_Colon	OK	0.0173581	0.458942	4.72463	-4.15452	3.25966e-05	0.000809741	yes
XLOC_006081	Gpr137b	chr13:13448191-13485898	CR_Ileum	CR_Colon	OK	0.31742	8.20828	4.69262	-5.39676	6.78566e-08	3.15402e-06	yes
XLOC_011201	E230025N22Rik	chr18:36844234-36855753	CR_Ileum	CR_Colon	OK	0.115185	2.97857	4.6926	-3.2252	0.00125885	0.018029	yes
XLOC_023280	Lpcat2	chr8:95379245-95443178	CR_Ileum	CR_Colon	OK	0.347403	8.94457	4.68633	-4.81073	1.50382e-06	5.26966e-05	yes
XLOC_015711	4930503B20Rik	chr3:146308172-146349608	CR_Ileum	CR_Colon	OK	0.0556839	1.42369	4.67623	-3.38941	0.000700434	0.0112055	yes
XLOC_017021	St3gal3	chr4:117604756-117807519	CR_Ileum	CR_Colon	OK	1.87214	47.7541	4.67287	-6.86828	6.49814e-12	5.78996e-10	yes
XLOC_016479	Pla2g2c	chr4:138281239-138300490	CR_Ileum	CR_Colon	OK	0.0888456	2.26197	4.67014	-4.12683	3.67801e-05	0.000897112	yes
XLOC_012622	Lypd6b	chr2:49643205-49804366	CR_Ileum	CR_Colon	OK	0.102468	2.58962	4.65949	-5.68792	1.28595e-08	6.89974e-07	yes
XLOC_012094	Cyp2c69	chr19:39917144-39961259	CR_Ileum	CR_Colon	OK	0.392726	9.60144	4.61166	-6.40815	1.47299e-10	1.07808e-08	yes
XLOC_011068	-	chr18:75060207-75063354	CR_Ileum	CR_Colon	OK	0.046651	1.13935	4.61016	-3.30527	0.000948865	0.0143353	yes
XLOC_008747	B3gnt5	chr16:19760321-19772963	CR_Ileum	CR_Colon	OK	0.363594	8.79577	4.59641	-6.50621	7.70686e-11	5.88495e-09	yes
XLOC_022909	Lrrc8e	chr8:4226826-4237470	CR_Ileum	CR_Colon	OK	0.177295	4.20693	4.56854	-4.43958	9.01332e-06	0.000259546	yes
XLOC_021823	Cd177	chr7:25528999-25545483	CR_Ileum	CR_Colon	OK	3.59473	85.2386	4.56755	-9.02633	0	0	yes
XLOC_022689	Ano1	chr7:151774374-151937924	CR_Ileum	CR_Colon	OK	1.56231	36.9771	4.56488	-6.34101	2.28264e-10	1.61531e-08	yes
XLOC_009370	Cldn14	chr16:93919275-94009082	CR_Ileum	CR_Colon	OK	0.128514	3.03244	4.56048	-4.92985	8.22908e-07	3.06597e-05	yes
XLOC_023286	Mt3	chr8:96676506-96678048	CR_Ileum	CR_Colon	OK	0.542007	12.5849	4.53724	-5.38753	7.14337e-08	3.29888e-06	yes
XLOC_007815	Kctd17	chr15:78259047-78269733	CR_Ileum	CR_Colon	OK	0.683313	15.7126	4.52323	-6.30572	2.86861e-10	1.98816e-08	yes
XLOC_021849	Mia1	chr7:27964759-27966400	CR_Ileum	CR_Colon	OK	0.276009	6.21137	4.49212	-4.54795	5.41713e-06	0.000165837	yes
XLOC_004347	Plcd3	chr11:102931609-102962972	CR_Ileum	CR_Colon	OK	0.0807395	1.80842	4.48531	-5.82348	5.76351e-09	3.29623e-07	yes
XLOC_017792	-	chr5:64924273-64929062	CR_Ileum	CR_Colon	OK	0.107416	2.37575	4.4671	-4.07522	4.59699e-05	0.00109061	yes
XLOC_024741	Dzip1l	chr9:99530013-99569675	CR_Ileum	CR_Colon	OK	0.0153457	0.338505	4.46327	-3.28343	0.00102551	0.0152853	yes
XLOC_001383	-	chr1:57040623-57043032	CR_Ileum	CR_Colon	OK	0.028841	0.627074	4.44244	-4.18815	2.81238e-05	0.000710471	yes
XLOC_023109	Npy1r	chr8:69221111-69230697	CR_Ileum	CR_Colon	OK	0.0994596	2.1617	4.44191	-4.55556	5.22458e-06	0.000160718	yes
XLOC_007878	Bik	chr15:83357291-83375065	CR_Ileum	CR_Colon	OK	0.276304	5.94822	4.42813	-5.35265	8.66773e-08	3.94624e-06	yes
XLOC_025826	Slc6a14	chrX:21292025-21319483	CR_Ileum	CR_Colon	OK	6.88161	147.266	4.41954	-8.36829	0	0	yes
XLOC_022032	Dkkl1	chr7:52462894-52467253	CR_Ileum	CR_Colon	OK	0.0440375	0.941733	4.41851	-2.96282	0.00304837	0.0368751	yes
XLOC_009362	-	chr16:92157775-92159168	CR_Ileum	CR_Colon	OK	0.0834085	1.7803	4.41578	-2.97784	0.00290289	0.0354766	yes
XLOC_009216	Boc	chr16:44484854-44558983	CR_Ileum	CR_Colon	OK	0.647351	13.7188	4.40546	-6.70454	2.02036e-11	1.67958e-09	yes
XLOC_005167	Vipr2	chr12:117316195-117384798	CR_Ileum	CR_Colon	OK	0.0612337	1.29217	4.39933	-3.07876	0.00207867	0.027225	yes
XLOC_020079	Sfxn5	chr6:85163044-85283416	CR_Ileum	CR_Colon	OK	0.260502	5.49034	4.39753	-5.35871	8.38175e-08	3.83254e-06	yes
XLOC_016204	Ak4	chr4:101091893-101140376	CR_Ileum	CR_Colon	OK	0.0755206	1.5893	4.39538	-3.82264	0.00013203	0.00272616	yes
XLOC_012316	-	chr19:57684002-57685361	CR_Ileum	CR_Colon	OK	0.0226071	0.475155	4.39355	-2.89642	0.00377449	0.0437138	yes
XLOC_016569	Mir34a	chr4:149442557-149443763	CR_Ileum	CR_Colon	OK	0.0353885	0.743585	4.39315	-2.92673	0.00342546	0.0404369	yes
XLOC_005904	Trpc7	chr13:56866700-56996949	CR_Ileum	CR_Colon	OK	0.0189077	0.393104	4.37787	-4.08122	4.48001e-05	0.00106695	yes
XLOC_000250	B3gnt7	chr1:88177465-88203880	CR_Ileum	CR_Colon	OK	8.64121	176.796	4.35471	-9.73871	0	0	yes
XLOC_016403	Col16a1	chr4:129724992-129776521	CR_Ileum	CR_Colon	OK	0.172916	3.49124	4.3356	-6.73502	1.63909e-11	1.38071e-09	yes
XLOC_017417	-	chr4:55663596-55664933	CR_Ileum	CR_Colon	OK	0.0366145	0.735366	4.32798	-3.4094	0.000651062	0.010547	yes
XLOC_023117	Lpl	chr8:71404453-71430831	CR_Ileum	CR_Colon	OK	0.150835	3.01842	4.32275	-6.62712	3.42291e-11	2.75983e-09	yes
XLOC_002343	Casp14	chr10:78174728-78181038	CR_Ileum	CR_Colon	OK	0.138698	2.77286	4.32136	-5.59737	2.17634e-08	1.12217e-06	yes
XLOC_012431	Myo3a	chr2:22149129-22474189	CR_Ileum	CR_Colon	OK	0.0740245	1.47712	4.31864	-3.85138	0.000117452	0.0024599	yes
XLOC_006732	Cphx	chr14:26762029-26775851	CR_Ileum	CR_Colon	OK	0.0367908	0.720949	4.29248	-3.89144	9.96511e-05	0.00213351	yes
XLOC_017905	Anxa3	chr5:97222403-97274987	CR_Ileum	CR_Colon	OK	3.14331	61.5944	4.29244	-6.61858	3.62668e-11	2.91672e-09	yes
XLOC_018298	-	chr5:17076402-17077562	CR_Ileum	CR_Colon	OK	0.101725	1.98975	4.28984	-3.12554	0.0017748	0.0239644	yes
XLOC_008005	-	chr15:102488146-102490869	CR_Ileum	CR_Colon	OK	0.0414436	0.805129	4.28	-3.04636	0.0023163	0.0296989	yes
XLOC_016276	Pdzk1ip1	chr4:114761312-114766503	CR_Ileum	CR_Colon	OK	5.47579	106.199	4.27755	-6.84754	7.5131e-12	6.6384e-10	yes
XLOC_023417	-	chr8:120213064-120217074	CR_Ileum	CR_Colon	OK	0.0408939	0.790907	4.27355	-4.64702	3.36758e-06	0.000108522	yes
XLOC_018951	-	chr5:17074652-17076284	CR_Ileum	CR_Colon	OK	0.0214708	0.413539	4.26757	-3.02989	0.00244641	0.0310428	yes
XLOC_013092	Slc24a3	chr2:144993472-145467851	CR_Ileum	CR_Colon	OK	0.0601328	1.15561	4.26436	-3.9792	6.91471e-05	0.00155368	yes
XLOC_008251	Elfn2	chr15:78497787-78548543	CR_Ileum	CR_Colon	OK	0.0461048	0.884024	4.2611	-3.69303	0.000221599	0.00424565	yes
XLOC_000335	-	chr1:107760313-107774872	CR_Ileum	CR_Colon	OK	0.100346	1.87939	4.22721	-4.56525	4.98888e-06	0.000154279	yes
XLOC_015639	Synpo2	chr3:122778270-122939067	CR_Ileum	CR_Colon	OK	0.0191496	0.357665	4.22322	-4.86069	1.1698e-06	4.20263e-05	yes
XLOC_026019	Gspt2	chrX:91881407-91883982	CR_Ileum	CR_Colon	OK	0.0679025	1.2641	4.2185	-4.38491	1.16032e-05	0.000324043	yes
XLOC_006737	Cphx	chr14:27041393-27055221	CR_Ileum	CR_Colon	OK	0.0278821	0.517519	4.2142	-3.40546	0.000660525	0.01067	yes
XLOC_011320	-	chr18:75048145-75056854	CR_Ileum	CR_Colon	OK	0.132882	2.42047	4.18707	-4.07905	4.52196e-05	0.00107522	yes
XLOC_005286	Clec14a	chr12:59361722-59370245	CR_Ileum	CR_Colon	OK	0.217139	3.95454	4.18682	-5.69002	1.27021e-08	6.8219e-07	yes
XLOC_025514	Cmtm8	chr9:114698462-114753439	CR_Ileum	CR_Colon	OK	0.359798	6.53409	4.18272	-5.38812	7.11978e-08	3.29004e-06	yes
XLOC_025618	-	chr9:54962409-54964442	CR_Ileum	CR_Colon	OK	0.0239288	0.434105	4.18122	-3.4762	0.000508573	0.00856677	yes
XLOC_016031	Atp8b5	chr4:43280004-43386703	CR_Ileum	CR_Colon	OK	0.0480232	0.863759	4.16882	-3.34177	0.000832458	0.0128878	yes
XLOC_019960	-	chr6:50923362-50947433	CR_Ileum	CR_Colon	OK	0.0692861	1.24617	4.16879	-2.86827	0.00412725	0.0468779	yes
XLOC_011801	-	chr19:54157294-54161047	CR_Ileum	CR_Colon	OK	0.0376881	0.676723	4.16638	-3.08061	0.00206576	0.027084	yes
XLOC_020973	Klk1b4	chr7:51462804-51467124	CR_Ileum	CR_Colon	OK	0.141218	2.53369	4.16524	-4.36894	1.24851e-05	0.000345715	yes
XLOC_011761	Kazald1	chr19:45149739-45153779	CR_Ileum	CR_Colon	OK	0.216027	3.83087	4.14839	-4.21352	2.51426e-05	0.000644317	yes
XLOC_003544	-	chr11:112208172-112211664	CR_Ileum	CR_Colon	OK	0.0277136	0.491198	4.14764	-3.23701	0.00120788	0.0174464	yes
XLOC_019238	Cpa2	chr6:30491641-30514473	CR_Ileum	CR_Colon	OK	0.1139	2.00492	4.1377	-4.55825	5.15805e-06	0.000158781	yes
XLOC_004870	Sstr1	chr12:59312328-59317023	CR_Ileum	CR_Colon	OK	0.534338	9.40145	4.13706	-5.57934	2.41437e-08	1.23175e-06	yes
XLOC_001541	Rgs17	chr10:4424140-4520877	CR_Ileum	CR_Colon	OK	0.0857247	1.49597	4.12523	-6.05558	1.39909e-09	8.79401e-08	yes
XLOC_026241	Asb11	chrX:160874898-160897089	CR_Ileum	CR_Colon	OK	0.0545399	0.951701	4.12512	-3.00722	0.00263653	0.0328983	yes
XLOC_001191	-	chr1:167974674-167979639	CR_Ileum	CR_Colon	OK	0.0705844	1.23144	4.12486	-5.42547	5.7803e-08	2.73537e-06	yes
XLOC_025993	-	chrX:74610240-74613919	CR_Ileum	CR_Colon	OK	0.0203563	0.352529	4.11419	-3.10059	0.00193137	0.0256038	yes
XLOC_005688	Amph	chr13:19040239-19242784	CR_Ileum	CR_Colon	OK	0.035802	0.606493	4.08238	-4.33408	1.4637e-05	0.000398203	yes
XLOC_022767	-	chr7:79467868-79469667	CR_Ileum	CR_Colon	OK	0.0679255	1.13969	4.06855	-4.26521	1.99716e-05	0.000524822	yes
XLOC_009117	Etv5	chr16:22381385-22439643	CR_Ileum	CR_Colon	OK	0.588637	9.79074	4.05597	-5.04826	4.45858e-07	1.75882e-05	yes
XLOC_017918	Arhgap24	chr5:102910409-103326956	CR_Ileum	CR_Colon	OK	0.238432	3.95867	4.05337	-4.33869	1.43336e-05	0.000391002	yes
XLOC_018447	Tlr1	chr5:65315918-65324828	CR_Ileum	CR_Colon	OK	1.77663	29.3664	4.04695	-5.99647	2.01653e-09	1.23876e-07	yes
XLOC_014294	-	chr2:167399533-167403495	CR_Ileum	CR_Colon	OK	0.0395738	0.650545	4.03903	-4.06587	4.7854e-05	0.00112927	yes
XLOC_005356	0610009B14Rik	chr12:81787361-81793453	CR_Ileum	CR_Colon	OK	0.084702	1.38415	4.03046	-3.77267	0.000161513	0.00323829	yes
XLOC_015706	Wdr63	chr3:145703489-145771000	CR_Ileum	CR_Colon	OK	0.0728655	1.18664	4.02551	-3.01393	0.00257891	0.0323447	yes
XLOC_008634	-	chr15:100159455-100160563	CR_Ileum	CR_Colon	OK	0.0551916	0.882515	3.9991	-3.16531	0.00154919	0.0214113	yes
XLOC_015584	Gstm2	chr3:107784619-107789354	CR_Ileum	CR_Colon	OK	5.9701	94.6966	3.98749	-8.1481	4.44089e-16	6.97145e-14	yes
XLOC_020975	Klk1	chr7:51480806-51491492	CR_Ileum	CR_Colon	OK	78.032	1235.24	3.98458	-9.05053	0	0	yes
XLOC_022716	-	chr7:26354511-26354742	CR_Ileum	CR_Colon	OK	0.574114	9.06868	3.98148	-3.02988	0.00244651	0.0310428	yes
XLOC_015342	Tdo2	chr3:81762335-81779650	CR_Ileum	CR_Colon	OK	0.0305861	0.475645	3.95894	-3.21131	0.0013213	0.0187745	yes
XLOC_003224	1700016K19Rik	chr11:75813413-75817071	CR_Ileum	CR_Colon	OK	0.0923789	1.43465	3.95699	-2.9453	0.00322647	0.0385218	yes
XLOC_000326	-	chr1:98768853-98775638	CR_Ileum	CR_Colon	OK	0.0412653	0.64066	3.95656	-3.58037	0.000343113	0.00614496	yes
XLOC_001644	9030224M15Rik	chr10:40403087-40530889	CR_Ileum	CR_Colon	OK	0.0458192	0.709932	3.95366	-3.51492	0.000439889	0.00758053	yes
XLOC_001500	-	chr1:166505142-166510195	CR_Ileum	CR_Colon	OK	0.028691	0.443994	3.95187	-4.54238	5.56217e-06	0.000169762	yes
XLOC_009042	Pla2g10	chr16:13715149-13740068	CR_Ileum	CR_Colon	OK	5.12293	78.5041	3.93773	-5.05264	4.35756e-07	1.72264e-05	yes
XLOC_009889	Gpr110	chr17:43407295-43463538	CR_Ileum	CR_Colon	OK	0.0511609	0.781191	3.93256	-3.81969	0.000133622	0.00275492	yes
XLOC_013360	Slc17a9	chr2:180459985-180478284	CR_Ileum	CR_Colon	OK	3.19326	48.6696	3.92992	-6.8419	7.81486e-12	6.87766e-10	yes
XLOC_001499	-	chr1:166501980-166504922	CR_Ileum	CR_Colon	OK	0.0269366	0.409654	3.92677	-3.73387	0.000188561	0.00369684	yes
XLOC_004575	-	chr11:52290817-52295348	CR_Ileum	CR_Colon	OK	0.050745	0.76887	3.9214	-4.88689	1.02444e-06	3.72968e-05	yes
XLOC_005341	-	chr12:78139466-78153812	CR_Ileum	CR_Colon	OK	0.237226	3.58906	3.91928	-3.16436	0.00155426	0.0214734	yes
XLOC_005839	Gmpr	chr13:45602825-45641750	CR_Ileum	CR_Colon	OK	0.688753	10.4079	3.91755	-4.99394	5.91593e-07	2.27819e-05	yes
XLOC_013557	Traf1	chr2:34798643-34817292	CR_Ileum	CR_Colon	OK	0.444261	6.70838	3.91648	-4.43408	9.24662e-06	0.000265576	yes
XLOC_021262	Trim6	chr7:111367308-111383666	CR_Ileum	CR_Colon	OK	0.299803	4.4848	3.90296	-4.60578	4.10919e-06	0.000129785	yes
XLOC_014031	Gatm	chr2:122420208-122437013	CR_Ileum	CR_Colon	OK	0.259947	3.80335	3.87098	-5.56189	2.66866e-08	1.34971e-06	yes
XLOC_008495	Ppp1r1a	chr15:103360709-103368423	CR_Ileum	CR_Colon	OK	0.0397916	0.581317	3.86879	-3.19238	0.00141105	0.0198262	yes
XLOC_023098	Mfap3l	chr8:63111656-63155528	CR_Ileum	CR_Colon	OK	0.178412	2.59078	3.8601	-4.62906	3.67322e-06	0.000117401	yes
XLOC_022515	Nupr1	chr7:133766759-133769350	CR_Ileum	CR_Colon	OK	17.5603	252.802	3.84762	-7.57976	3.4639e-14	4.27466e-12	yes
XLOC_025316	Cgnl1	chr9:71474315-71619409	CR_Ileum	CR_Colon	OK	0.305136	4.38504	3.84507	-5.83806	5.28108e-09	3.03046e-07	yes
XLOC_001497	-	chr1:166441940-166444964	CR_Ileum	CR_Colon	OK	0.0226199	0.322792	3.83494	-3.58771	0.000333599	0.0060039	yes
XLOC_008248	C1qtnf6	chr15:78353775-78363325	CR_Ileum	CR_Colon	OK	1.4023	19.8607	3.82405	-5.92855	3.05627e-09	1.82547e-07	yes
XLOC_004175	Epn3	chr11:94348321-94361459	CR_Ileum	CR_Colon	OK	0.831527	11.7469	3.82037	-6.17448	6.63825e-10	4.36389e-08	yes
XLOC_004325	Ppy	chr11:101961244-101962631	CR_Ileum	CR_Colon	OK	0.650563	9.13201	3.81117	-3.98317	6.80021e-05	0.00153261	yes
XLOC_004008	Pitpnm3	chr11:71861029-71949391	CR_Ileum	CR_Colon	OK	0.43706	6.13216	3.81049	-4.82814	1.37812e-06	4.87052e-05	yes
XLOC_008777	St6gal1	chr16:23224834-23360558	CR_Ileum	CR_Colon	OK	0.808098	11.2565	3.80008	-5.48563	4.1201e-08	2.00967e-06	yes
XLOC_000858	Abca12	chr1:71288713-71461484	CR_Ileum	CR_Colon	OK	0.0900802	1.24828	3.79259	-5.57517	2.47285e-08	1.25812e-06	yes
XLOC_020974	Klk1b5	chr7:51471844-51476073	CR_Ileum	CR_Colon	OK	0.430165	5.92262	3.78327	-5.15743	2.50365e-07	1.03602e-05	yes
XLOC_013056	Prnp	chr2:131735663-131764167	CR_Ileum	CR_Colon	OK	2.32045	31.5196	3.76377	-7.46021	8.63754e-14	1.01517e-11	yes
XLOC_000920	A630001G21Rik	chr1:87613657-87633197	CR_Ileum	CR_Colon	OK	0.216545	2.92314	3.75478	-4.11731	3.83321e-05	0.000929761	yes
XLOC_000688	Prdm14	chr1:13103508-13117244	CR_Ileum	CR_Colon	OK	0.0574847	0.775728	3.7543	-4.15658	3.23045e-05	0.000803205	yes
XLOC_001498	-	chr1:166499102-166501830	CR_Ileum	CR_Colon	OK	0.0321884	0.433636	3.75187	-3.77573	0.000159539	0.00320393	yes
XLOC_012044	Glis3	chr19:28333359-28754731	CR_Ileum	CR_Colon	OK	0.0629369	0.840504	3.73928	-5.27196	1.34972e-07	5.92051e-06	yes
XLOC_021096	Isg20	chr7:86058650-86065282	CR_Ileum	CR_Colon	OK	0.998174	13.2969	3.73565	-4.55785	5.16794e-06	0.000159041	yes
XLOC_025010	Kank2	chr9:21571216-21602990	CR_Ileum	CR_Colon	OK	0.387411	5.13602	3.72871	-6.36828	1.91158e-10	1.37374e-08	yes
XLOC_017098	Gjb5	chr4:127032052-127035408	CR_Ileum	CR_Colon	OK	0.148816	1.9704	3.72688	-4.41101	1.02891e-05	0.000291969	yes
XLOC_014914	Selenbp1	chr3:94737004-94748680	CR_Ileum	CR_Colon	OK	50.712	667.819	3.71906	-8.22983	2.22045e-16	3.57154e-14	yes
XLOC_007617	-	chr14:106019643-106021513	CR_Ileum	CR_Colon	OK	0.0275217	0.361605	3.71577	-2.91237	0.00358695	0.0419708	yes
XLOC_007438	1190002H23Rik	chr14:79688556-79701442	CR_Ileum	CR_Colon	OK	0.906337	11.9023	3.71505	-5.70356	1.17332e-08	6.34447e-07	yes
XLOC_021854	Spnb4	chr7:28141401-28231608	CR_Ileum	CR_Colon	OK	0.043131	0.565023	3.71151	-2.85771	0.00426713	0.0481266	yes
XLOC_005607	-	chr12:88172062-88173417	CR_Ileum	CR_Colon	OK	0.0580071	0.759789	3.7113	-3.24064	0.00119261	0.0172629	yes
XLOC_005907	Ntrk2	chr13:58907956-59231328	CR_Ileum	CR_Colon	OK	0.0803457	1.04969	3.7076	-5.34291	9.14662e-08	4.13882e-06	yes
XLOC_007337	D14Ertd668e	chr14:59966127-59984332	CR_Ileum	CR_Colon	OK	0.328384	4.26487	3.69905	-4.07996	4.50435e-05	0.0010716	yes
XLOC_015374	Pear1	chr3:87552959-87572875	CR_Ileum	CR_Colon	OK	0.145511	1.88949	3.6988	-3.09903	0.00194154	0.0257202	yes
XLOC_012424	Msrb2	chr2:19293262-19316597	CR_Ileum	CR_Colon	OK	0.324208	4.20288	3.69639	-4.93356	8.07438e-07	3.0139e-05	yes
XLOC_022250	-	chr7:105534805-105560397	CR_Ileum	CR_Colon	OK	0.0710461	0.920515	3.69561	-3.51635	0.000437527	0.00754451	yes
XLOC_006627	-	chr13:99358281-99360102	CR_Ileum	CR_Colon	OK	0.0474158	0.611769	3.68955	-3.65202	0.000260188	0.0048572	yes
XLOC_024603	Igdcc4	chr9:64949275-64985750	CR_Ileum	CR_Colon	OK	0.784201	9.94426	3.66457	-6.36457	1.9584e-10	1.40575e-08	yes
XLOC_023346	Hsd11b2	chr8:108042645-108047956	CR_Ileum	CR_Colon	OK	15.747	199.295	3.66176	-8.48678	0	0	yes
XLOC_022067	Saa1	chr7:53995868-53998350	CR_Ileum	CR_Colon	OK	44.0135	556.872	3.66133	-6.87759	6.08735e-12	5.4436e-10	yes
XLOC_005332	Esr2	chr12:77219532-77278246	CR_Ileum	CR_Colon	OK	0.0507477	0.636812	3.64945	-3.8064	0.000141007	0.0028847	yes
XLOC_015585	Gstm1	chr3:107815166-107823437	CR_Ileum	CR_Colon	OK	15.8765	199.191	3.64919	-8.49364	0	0	yes
XLOC_015111	Adh1	chr3:137940608-137953655	CR_Ileum	CR_Colon	OK	45.5027	560.259	3.62207	-8.56834	0	0	yes
XLOC_019596	Syn2	chr6:115084919-115232672	CR_Ileum	CR_Colon	OK	0.205561	2.5296	3.62127	-3.81779	0.000134655	0.00277364	yes
XLOC_008843	Ildr1	chr16:36694030-36730168	CR_Ileum	CR_Colon	OK	4.81446	59.0414	3.61628	-7.64511	2.08722e-14	2.6893e-12	yes
XLOC_016261	Spata6	chr4:111392614-111501745	CR_Ileum	CR_Colon	OK	0.16427	2.01358	3.61562	-4.87495	1.08834e-06	3.93737e-05	yes
XLOC_015719	Nexn	chr3:151899947-151929284	CR_Ileum	CR_Colon	OK	0.0564606	0.686305	3.60353	-3.6304	0.000282981	0.0052165	yes
XLOC_018825	Zan	chr5:137819833-137918292	CR_Ileum	CR_Colon	OK	1.11799	13.3845	3.58158	-6.0505	1.44401e-09	9.06102e-08	yes
XLOC_020791	Ethe1	chr7:25368856-25393944	CR_Ileum	CR_Colon	OK	43.1158	515.902	3.58081	-7.21894	5.24025e-13	5.5112e-11	yes
XLOC_022569	-	chr7:136906142-136913476	CR_Ileum	CR_Colon	OK	0.293422	3.47959	3.56787	-3.45952	0.000541146	0.00903256	yes
XLOC_003160	Eno3	chr11:70469050-70476015	CR_Ileum	CR_Colon	OK	5.54684	65.591	3.56376	-6.77644	1.23173e-11	1.05476e-09	yes
XLOC_017188	4930555I21Rik	chr4:135051901-135093718	CR_Ileum	CR_Colon	OK	0.065158	0.762924	3.54952	-3.12864	0.00175617	0.0237604	yes
XLOC_005186	Fkbp1b	chr12:4839979-4848401	CR_Ileum	CR_Colon	OK	0.149709	1.74988	3.54703	-3.72955	0.000191824	0.00375123	yes
XLOC_016137	Tlr4	chr4:66488598-66508174	CR_Ileum	CR_Colon	OK	0.232916	2.70774	3.53921	-4.24238	2.21166e-05	0.000574125	yes
XLOC_020502	-	chr6:94763017-94767570	CR_Ileum	CR_Colon	OK	0.0947556	1.08382	3.51576	-4.82273	1.41604e-06	4.99044e-05	yes
XLOC_003844	Pdlim4	chr11:53868429-53882519	CR_Ileum	CR_Colon	OK	0.11853	1.35345	3.51332	-3.73942	0.000184447	0.00362515	yes
XLOC_000454	Fam129a	chr1:153418502-153569085	CR_Ileum	CR_Colon	OK	0.724917	8.26244	3.51068	-5.63975	1.70298e-08	8.92601e-07	yes
XLOC_011459	Aldh3b2	chr19:3972327-3981665	CR_Ileum	CR_Colon	OK	0.379047	4.31331	3.50835	-5.4842	4.15356e-08	2.02465e-06	yes
XLOC_018035	Slc24a6	chr5:120961191-120984036	CR_Ileum	CR_Colon	OK	2.85785	32.4325	3.50444	-6.67438	2.48279e-11	2.04185e-09	yes
XLOC_017129	Ptpru	chr4:131324371-131394203	CR_Ileum	CR_Colon	OK	0.165243	1.82657	3.46647	-5.40793	6.37585e-08	2.97912e-06	yes
XLOC_011026	Htr4	chr18:62483197-62657731	CR_Ileum	CR_Colon	OK	0.805185	8.87545	3.46243	-4.33822	1.43638e-05	0.000391684	yes
XLOC_007078	Oit1	chr14:9181454-9211487	CR_Ileum	CR_Colon	OK	84.1957	927.478	3.46149	-6.58278	4.61733e-11	3.65912e-09	yes
XLOC_001360	-	chr1:37084554-37087124	CR_Ileum	CR_Colon	OK	0.050673	0.55502	3.45325	-3.5983	0.000320301	0.00580095	yes
XLOC_015210	-	chr3:24449753-24453502	CR_Ileum	CR_Colon	OK	0.0514474	0.561887	3.44911	-3.00493	0.00265646	0.0331023	yes
XLOC_014912	Selenbp2	chr3:94416586-94562067	CR_Ileum	CR_Colon	OK	12.2122	132.566	3.44031	-4.63494	3.57038e-06	0.000114361	yes
XLOC_007647	Capsl	chr15:9365782-9395790	CR_Ileum	CR_Colon	OK	0.436744	4.71021	3.43093	-4.70148	2.58279e-06	8.55403e-05	yes
XLOC_009562	Ncrna00085	chr17:17967938-17976035	CR_Ileum	CR_Colon	OK	0.0851257	0.913514	3.42376	-3.37982	0.000725338	0.0115297	yes
XLOC_017461	-	chr4:94832471-94834810	CR_Ileum	CR_Colon	OK	0.0465867	0.499681	3.42302	-3.51391	0.000441562	0.00760463	yes
XLOC_025185	Dixdc1	chr9:50470110-50536089	CR_Ileum	CR_Colon	OK	0.166323	1.78134	3.4209	-4.12407	3.72231e-05	0.000906523	yes
XLOC_017821	Cwh43	chr5:73797316-73844664	CR_Ileum	CR_Colon	OK	0.568951	6.09221	3.42059	-4.53001	5.89822e-06	0.000178799	yes
XLOC_018376	Spon2	chr5:33556166-33561487	CR_Ileum	CR_Colon	OK	0.0821203	0.87909	3.4202	-3.58024	0.000343274	0.00614609	yes
XLOC_006985	-	chr14:70607598-70609578	CR_Ileum	CR_Colon	OK	0.0571613	0.611795	3.41994	-3.10674	0.00189165	0.0252006	yes
XLOC_013522	1700001O22Rik	chr2:30650953-30659177	CR_Ileum	CR_Colon	OK	0.322894	3.45298	3.41871	-3.15331	0.00161431	0.0221433	yes
XLOC_009325	Cldn8	chr16:88560453-88563470	CR_Ileum	CR_Colon	OK	2.64998	28.2354	3.41345	-6.66286	2.68554e-11	2.20045e-09	yes
XLOC_013394	Echdc3	chr2:6109510-6242657	CR_Ileum	CR_Colon	OK	0.446562	4.75018	3.41105	-5.0916	3.55056e-07	1.42517e-05	yes
XLOC_020186	-	chr6:114931689-114933403	CR_Ileum	CR_Colon	OK	0.0348057	0.369492	3.40815	-2.85983	0.00423871	0.0478794	yes
XLOC_000127	-	chr1:56027369-56028951	CR_Ileum	CR_Colon	OK	0.0689841	0.731558	3.40663	-3.07349	0.00211572	0.0276013	yes
XLOC_002142	Hebp2	chr10:18259928-18265882	CR_Ileum	CR_Colon	OK	0.284786	3.00049	3.39725	-4.91398	8.92464e-07	3.29254e-05	yes
XLOC_020796	Ceacam10	chr7:25562222-25569674	CR_Ileum	CR_Colon	OK	3.96177	41.6767	3.39502	-6.29401	3.09359e-10	2.13779e-08	yes
XLOC_016425	-	chr4:132640282-132644244	CR_Ileum	CR_Colon	OK	0.0440127	0.462432	3.39325	-3.83193	0.00012714	0.00263744	yes
XLOC_009434	-	chr16:30063208-30065167	CR_Ileum	CR_Colon	OK	0.0765908	0.803269	3.39064	-3.80814	0.000140018	0.00286817	yes
XLOC_009674	Rgs11	chr17:26339891-26348269	CR_Ileum	CR_Colon	OK	0.450919	4.68945	3.37848	-3.56266	0.000367112	0.00650347	yes
XLOC_011321	Lipg	chr18:75098973-75121151	CR_Ileum	CR_Colon	OK	1.51307	15.716	3.37669	-6.39338	1.62263e-10	1.17944e-08	yes
XLOC_014979	-	chr3:101471352-101477843	CR_Ileum	CR_Colon	OK	0.310894	3.20481	3.36575	-5.05145	4.38469e-07	1.73305e-05	yes
XLOC_001157	Prdx6	chr1:163170242-163181326	CR_Ileum	CR_Colon	OK	45.8496	471.845	3.36333	-6.81789	9.23861e-12	8.04462e-10	yes
XLOC_014615	Pkia	chr3:7366603-7445365	CR_Ileum	CR_Colon	OK	0.104938	1.07874	3.36174	-4.64317	3.43111e-06	0.000110234	yes
XLOC_025171	Zbtb16	chr9:48459906-48644050	CR_Ileum	CR_Colon	OK	0.0330356	0.33841	3.35668	-3.36846	0.000755896	0.0119264	yes
XLOC_012086	Rbp4	chr19:38191109-38199811	CR_Ileum	CR_Colon	OK	0.82182	8.39775	3.35311	-3.5601	0.000370709	0.0065562	yes
XLOC_008186	9030619P08Rik	chr15:75258033-75262259	CR_Ileum	CR_Colon	OK	1.07585	10.9578	3.3484	-2.94659	0.00321301	0.038407	yes
XLOC_016110	-	chr4:58661981-58666718	CR_Ileum	CR_Colon	OK	0.0756158	0.763833	3.3365	-3.59723	0.000321625	0.0058202	yes
XLOC_010178	Slc9a3r2	chr17:24776226-24787250	CR_Ileum	CR_Colon	OK	0.55094	5.55011	3.33255	-5.09827	3.42776e-07	1.38087e-05	yes
XLOC_019961	Mir148a	chr6:51217988-51219909	CR_Ileum	CR_Colon	OK	0.068823	0.687358	3.3201	-3.42184	0.000621991	0.0101471	yes
XLOC_009754	Cd320	chr17:33980035-33986719	CR_Ileum	CR_Colon	OK	1.07907	10.7767	3.32005	-5.6716	1.41469e-08	7.52866e-07	yes
XLOC_000878	Mir375	chr1:74946132-74947295	CR_Ileum	CR_Colon	OK	0.130556	1.30107	3.31695	-3.44401	0.000573163	0.00949067	yes
XLOC_011334	Setbp1	chr18:78947116-79306130	CR_Ileum	CR_Colon	OK	0.164114	1.63522	3.31672	-5.26662	1.38959e-07	6.07619e-06	yes
XLOC_014256	Slpi	chr2:164179805-164182243	CR_Ileum	CR_Colon	OK	0.111317	1.09948	3.30407	-2.89741	0.00376253	0.0436071	yes
XLOC_023843	Ces1d	chr8:95689970-95721703	CR_Ileum	CR_Colon	OK	1.9738	19.4913	3.30378	-5.85426	4.7913e-09	2.76512e-07	yes
XLOC_015163	Ptger3	chr3:157229807-157307722	CR_Ileum	CR_Colon	OK	0.165834	1.63611	3.30245	-3.91389	9.08195e-05	0.00196837	yes
XLOC_014865	S100a14	chr3:90330769-90332757	CR_Ileum	CR_Colon	OK	7.80495	76.7389	3.2975	-6.07861	1.21227e-09	7.67404e-08	yes
XLOC_024627	C2cd4b	chr9:67607243-67608740	CR_Ileum	CR_Colon	OK	0.82074	8.03973	3.29215	-5.00664	5.5387e-07	2.14491e-05	yes
XLOC_010488	Sult1c2	chr17:53968961-53985283	CR_Ileum	CR_Colon	OK	1.75912	17.1678	3.28678	-5.57658	2.45286e-08	1.24939e-06	yes
XLOC_017919	Ptpn13	chr5:103854210-104027388	CR_Ileum	CR_Colon	OK	0.243227	2.34632	3.27003	-4.43148	9.35866e-06	0.000268516	yes
XLOC_017799	Klb	chr5:65739642-65778199	CR_Ileum	CR_Colon	OK	0.149813	1.43827	3.2631	-3.18773	0.00143395	0.0201	yes
XLOC_013341	Cdh26	chr2:178165311-178222071	CR_Ileum	CR_Colon	OK	0.0940059	0.892711	3.24737	-3.76274	0.000168062	0.00335086	yes
XLOC_012869	Pamr1	chr2:102390177-102483197	CR_Ileum	CR_Colon	OK	0.0455195	0.431508	3.24483	-3.30551	0.000948051	0.014326	yes
XLOC_020495	-	chr6:86531479-86532693	CR_Ileum	CR_Colon	OK	0.0741429	0.700882	3.24079	-3.16849	0.00153235	0.021213	yes
XLOC_011074	Zbtb7c	chr18:75979831-76308219	CR_Ileum	CR_Colon	OK	0.366284	3.46219	3.24065	-4.69096	2.71927e-06	8.95663e-05	yes
XLOC_011716	Cyp2c55	chr19:39081508-39117177	CR_Ileum	CR_Colon	OK	47.5899	449.566	3.2398	-6.3716	1.87063e-10	1.34692e-08	yes
XLOC_021370	Acsm3	chr7:126904436-126937572	CR_Ileum	CR_Colon	OK	6.91943	65.1834	3.23578	-5.66346	1.48348e-08	7.87023e-07	yes
XLOC_015369	Cd1d1	chr3:86790507-86803262	CR_Ileum	CR_Colon	OK	0.542761	5.10802	3.23438	-3.93828	8.20693e-05	0.00180193	yes
XLOC_010823	Greb1l	chr18:10325176-10562939	CR_Ileum	CR_Colon	OK	0.0974807	0.912552	3.22672	-3.33358	0.000857363	0.0132117	yes
XLOC_000907	Irs1	chr1:82229679-82288014	CR_Ileum	CR_Colon	OK	0.0780597	0.728078	3.22144	-3.81547	0.000135926	0.00279491	yes
XLOC_014531	-	chr2:147762517-147769612	CR_Ileum	CR_Colon	OK	0.571755	5.29779	3.21192	-6.1138	9.7288e-10	6.25128e-08	yes
XLOC_014462	-	chr2:75469729-75471618	CR_Ileum	CR_Colon	OK	0.0463485	0.429391	3.2117	-3.1412	0.00168255	0.0229096	yes
XLOC_006450	Tmem171	chr13:99456191-99465145	CR_Ileum	CR_Colon	OK	15.1058	139.938	3.21161	-6.7973	1.06597e-11	9.22419e-10	yes
XLOC_024678	Ddx43	chr9:78243583-78271445	CR_Ileum	CR_Colon	OK	0.108833	1.00402	3.2056	-2.86296	0.00419699	0.0475145	yes
XLOC_002529	-	chr10:118465232-118481419	CR_Ileum	CR_Colon	OK	0.143079	1.31059	3.19534	-3.15074	0.00162858	0.0222936	yes
XLOC_008084	-	chr15:37062660-37065515	CR_Ileum	CR_Colon	OK	0.0990081	0.90615	3.19413	-3.57617	0.000348665	0.00622633	yes
XLOC_023046	Ppp1r3b	chr8:36438794-36451296	CR_Ileum	CR_Colon	OK	0.892787	8.15328	3.19099	-5.39005	7.04375e-08	3.2583e-06	yes
XLOC_019597	Pparg	chr6:115310923-115440419	CR_Ileum	CR_Colon	OK	4.31944	39.3732	3.1883	-5.89295	3.79368e-09	2.22699e-07	yes
XLOC_025414	Trf	chr9:103111205-103132616	CR_Ileum	CR_Colon	OK	0.357943	3.25495	3.18483	-4.71534	2.41305e-06	8.06397e-05	yes
XLOC_001962	Rassf9	chr10:101974766-102012413	CR_Ileum	CR_Colon	OK	0.182974	1.65912	3.18071	-2.88685	0.00389117	0.044762	yes
XLOC_015760	-	chr3:23697066-23703616	CR_Ileum	CR_Colon	OK	0.0497017	0.44918	3.17593	-4.14919	3.33647e-05	0.000825498	yes
XLOC_002441	Utp20	chr10:88193908-88289559	CR_Ileum	CR_Colon	OK	2.87209	25.9266	3.17426	-3.12019	0.00180736	0.0243183	yes
XLOC_006647	-	chr13:108832400-108834548	CR_Ileum	CR_Colon	OK	0.0593784	0.529659	3.15705	-3.35579	0.000791378	0.0123639	yes
XLOC_025592	-	chr9:31272201-31272703	CR_Ileum	CR_Colon	OK	0.349066	3.08584	3.14409	-3.1968	0.0013896	0.0195685	yes
XLOC_026630	Armcx6	chrX:131282993-131285958	CR_Ileum	CR_Colon	OK	0.105426	0.931164	3.14281	-3.71493	0.000203257	0.00394596	yes
XLOC_021921	Ffar2	chr7:31603085-31608836	CR_Ileum	CR_Colon	OK	0.160362	1.41139	3.13772	-3.08831	0.00201297	0.0265084	yes
XLOC_000467	Glul	chr1:155747074-155756844	CR_Ileum	CR_Colon	OK	20.3242	178.459	3.13433	-7.64989	2.02061e-14	2.60953e-12	yes
XLOC_011760	Sfxn3	chr19:45121301-45130891	CR_Ileum	CR_Colon	OK	1.88007	16.4672	3.13074	-3.53282	0.000411157	0.00715322	yes
XLOC_010847	Ttr	chr18:20823728-20832827	CR_Ileum	CR_Colon	OK	1.95242	16.9893	3.1213	-5.10929	3.23366e-07	1.30883e-05	yes
XLOC_025518	-	chr9:115753139-115757378	CR_Ileum	CR_Colon	OK	0.0384669	0.334189	3.11898	-2.87245	0.00407303	0.0464068	yes
XLOC_012860	Trp53i11	chr2:93027716-93041916	CR_Ileum	CR_Colon	OK	6.49166	55.8221	3.10418	-6.42051	1.35819e-10	9.98108e-09	yes
XLOC_011139	Kctd1	chr18:15127193-15309955	CR_Ileum	CR_Colon	OK	0.241225	2.071	3.10187	-3.80256	0.000143211	0.00292358	yes
XLOC_014135	Foxa2	chr2:147867224-147872705	CR_Ileum	CR_Colon	OK	1.92748	16.4545	3.09369	-4.92298	8.52348e-07	3.16134e-05	yes
XLOC_016690	Slc35a1	chr4:34610468-34634693	CR_Ileum	CR_Colon	OK	12.098	102.881	3.08814	-6.22084	4.94507e-10	3.31959e-08	yes
XLOC_007979	Nr4a1	chr15:101097276-101105225	CR_Ileum	CR_Colon	OK	0.304307	2.58671	3.08752	-3.483	0.000495837	0.00838785	yes
XLOC_000712	Gm4956	chr1:21275326-21288393	CR_Ileum	CR_Colon	OK	0.129017	1.09536	3.08578	-3.18435	0.0014508	0.0202966	yes
XLOC_026552	Eda2r	chrX:94529179-94572548	CR_Ileum	CR_Colon	OK	0.0446961	0.37893	3.08371	-3.0257	0.00248057	0.0313956	yes
XLOC_024740	A4gnt	chr9:99512920-99523015	CR_Ileum	CR_Colon	OK	0.735325	6.22726	3.08215	-4.21587	2.48812e-05	0.00063843	yes
XLOC_026311	Mir221	chrX:18722416-18723514	CR_Ileum	CR_Colon	OK	0.138107	1.1609	3.07139	-3.25706	0.00112573	0.016499	yes
XLOC_002186	Ncoa7	chr10:30365387-30522913	CR_Ileum	CR_Colon	OK	0.957942	8.05212	3.07136	-4.09803	4.16678e-05	0.00100149	yes
XLOC_011216	Spry4	chr18:38745918-38760922	CR_Ileum	CR_Colon	OK	0.0810361	0.676407	3.06125	-3.69923	0.000216257	0.00416233	yes
XLOC_004679	-	chr11:96789445-96790383	CR_Ileum	CR_Colon	OK	0.365938	3.04531	3.05692	-4.007	6.14952e-05	0.00140622	yes
XLOC_003562	Cdr2l	chr11:115243229-115257446	CR_Ileum	CR_Colon	OK	0.245086	2.03877	3.05634	-3.76675	0.000165389	0.00330764	yes
XLOC_011928	Lgals12	chr19:7671150-7684957	CR_Ileum	CR_Colon	OK	1.95905	16.2696	3.05395	-4.08521	4.40367e-05	0.00105001	yes
XLOC_009369	Setd4	chr16:93583701-93605251	CR_Ileum	CR_Colon	OK	1.17872	9.7465	3.04766	-3.49288	0.000477843	0.00813051	yes
XLOC_024198	-	chr8:122752637-122754621	CR_Ileum	CR_Colon	OK	0.0651844	0.536996	3.04231	-3.21752	0.00129304	0.0184473	yes
XLOC_025912	Ddx26b	chrX:53707990-53761020	CR_Ileum	CR_Colon	OK	1.53249	12.5906	3.0384	-5.28639	1.24754e-07	5.50053e-06	yes
XLOC_012432	Gad2	chr2:22477846-22549397	CR_Ileum	CR_Colon	OK	0.0708261	0.580087	3.03392	-4.06623	4.77799e-05	0.00112788	yes
XLOC_019390	Fkbp9	chr6:56782052-56829354	CR_Ileum	CR_Colon	OK	1.99911	16.3681	3.03346	-6.29066	3.16124e-10	2.17874e-08	yes
XLOC_019810	Col28a1	chr6:7947807-8142617	CR_Ileum	CR_Colon	OK	0.0406847	0.332913	3.03259	-2.86059	0.00422853	0.0477887	yes
XLOC_016330	Hivep3	chr4:119486906-119808016	CR_Ileum	CR_Colon	OK	0.690239	5.64437	3.03164	-3.75683	0.000172082	0.00341843	yes
XLOC_017045	Rimkla	chr4:119137890-119165203	CR_Ileum	CR_Colon	OK	0.0955095	0.780608	3.03088	-4.03644	5.42684e-05	0.00125975	yes
XLOC_000544	Pvrl4	chr1:173299085-173318418	CR_Ileum	CR_Colon	OK	0.187088	1.52629	3.02824	-3.13394	0.00172474	0.0234037	yes
XLOC_012692	Chrna1	chr2:73399029-73418363	CR_Ileum	CR_Colon	OK	0.847461	6.88767	3.0228	-2.86487	0.00417187	0.0472951	yes
XLOC_005629	-	chr12:113190145-113192322	CR_Ileum	CR_Colon	OK	0.0505397	0.409641	3.01887	-3.1316	0.00173858	0.0235684	yes
XLOC_023272	Nod2	chr8:91171245-91212373	CR_Ileum	CR_Colon	OK	0.0929316	0.751583	3.01569	-4.03643	5.42717e-05	0.00125975	yes
XLOC_016818	-	chr4:59093930-59097300	CR_Ileum	CR_Colon	OK	0.0879959	0.711395	3.01514	-2.86413	0.00418151	0.0473797	yes
XLOC_000463	Rgs16	chr1:155587482-155592598	CR_Ileum	CR_Colon	OK	0.15293	1.23564	3.01431	-3.47724	0.000506607	0.00854076	yes
XLOC_023494	Nrp1	chr8:130881578-131029375	CR_Ileum	CR_Colon	OK	0.0795536	0.635744	2.99845	-4.08972	4.31888e-05	0.00103321	yes
XLOC_006078	Gpr137b-ps	chr13:12702159-12742713	CR_Ileum	CR_Colon	OK	0.858637	6.8608	2.99826	-3.51397	0.000441457	0.00760342	yes
XLOC_026169	Mir680-2	chrX:140732332-140732442	CR_Ileum	CR_Colon	OK	119.658	955.988	2.99807	-3.17725	0.00148676	0.0206992	yes
XLOC_003295	Slfn4	chr11:82988684-83003723	CR_Ileum	CR_Colon	OK	5.96625	47.6504	2.99759	-3.87193	0.000107977	0.00228756	yes
XLOC_008349	Mapk12	chr15:88961013-88971133	CR_Ileum	CR_Colon	OK	0.11413	0.901082	2.98098	-3.50753	0.000452287	0.00776466	yes
XLOC_016994	Tspan1	chr4:115834485-115840209	CR_Ileum	CR_Colon	OK	71.4607	561.195	2.97328	-5.85181	4.86261e-09	2.80337e-07	yes
XLOC_002270	Hk1	chr10:61731602-61842812	CR_Ileum	CR_Colon	OK	4.38692	34.4241	2.97214	-6.70991	1.94746e-11	1.62506e-09	yes
XLOC_017492	-	chr4:114617497-114624940	CR_Ileum	CR_Colon	OK	0.0701697	0.5506	2.97208	-4.23609	2.27441e-05	0.000588764	yes
XLOC_007129	Plac9	chr14:26707888-26722379	CR_Ileum	CR_Colon	OK	0.419765	3.28928	2.97012	-3.26367	0.00109981	0.0161874	yes
XLOC_015350	Tlr2	chr3:83640193-83645725	CR_Ileum	CR_Colon	OK	0.696264	5.44012	2.96593	-3.85338	0.0001165	0.00244364	yes
XLOC_016764	Fbxo10	chr4:45047119-45097476	CR_Ileum	CR_Colon	OK	0.0919807	0.718241	2.96507	-4.1366	3.52491e-05	0.000865854	yes
XLOC_017884	Parm1	chr5:91946687-92055919	CR_Ileum	CR_Colon	OK	4.65023	36.2334	2.96194	-5.95952	2.52984e-09	1.52955e-07	yes
XLOC_005784	Mboat1	chr13:30228358-30338563	CR_Ileum	CR_Colon	OK	11.21	87.2984	2.96117	-6.73705	1.61637e-11	1.36209e-09	yes
XLOC_007133	Plac9	chr14:26987272-27001759	CR_Ileum	CR_Colon	OK	0.891225	6.92655	2.95828	-3.77877	0.000157602	0.0031719	yes
XLOC_008492	Itga5	chr15:103174717-103197179	CR_Ileum	CR_Colon	OK	0.519206	4.03433	2.95795	-4.17882	2.9303e-05	0.000737743	yes
XLOC_018568	-	chr5:100434387-100435601	CR_Ileum	CR_Colon	OK	0.150835	1.15188	2.93294	-3.32876	0.000872335	0.0133987	yes
XLOC_016575	-	chr4:150182763-150184592	CR_Ileum	CR_Colon	OK	0.0887959	0.67571	2.92784	-3.24078	0.00119204	0.017258	yes
XLOC_024087	-	chr8:35338064-35338267	CR_Ileum	CR_Colon	OK	3.11226	23.4027	2.91064	-3.0388	0.00237519	0.0303158	yes
XLOC_002530	-	chr10:118482699-118496568	CR_Ileum	CR_Colon	OK	0.123554	0.919324	2.89543	-2.95151	0.0031622	0.037938	yes
XLOC_022878	-	chr7:148843284-148845168	CR_Ileum	CR_Colon	OK	0.0754896	0.561311	2.89445	-2.86148	0.00421662	0.0476902	yes
XLOC_016147	Cntln	chr4:84530230-84777822	CR_Ileum	CR_Colon	OK	0.0491825	0.365408	2.89329	-3.22461	0.00126144	0.0180602	yes
XLOC_007250	Ndrg2	chr14:52524945-52533163	CR_Ileum	CR_Colon	OK	8.09083	59.9074	2.88837	-6.74322	1.54912e-11	1.30789e-09	yes
XLOC_019173	Casd1	chr6:4550860-4593381	CR_Ileum	CR_Colon	OK	3.14401	23.1418	2.87982	-6.4018	1.53558e-10	1.12056e-08	yes
XLOC_008100	Sybu	chr15:44503402-44637375	CR_Ileum	CR_Colon	OK	0.567524	4.12839	2.86283	-3.68234	0.0002311	0.00440073	yes
XLOC_011753	Wnt8b	chr19:44567961-44589316	CR_Ileum	CR_Colon	OK	0.0532547	0.384803	2.85314	-3.04885	0.00229716	0.0295108	yes
XLOC_010549	1110012J17Rik	chr17:66686321-66799090	CR_Ileum	CR_Colon	OK	0.085678	0.619037	2.85303	-4.18658	2.83192e-05	0.000715	yes
XLOC_023933	Il34	chr8:113265728-113329817	CR_Ileum	CR_Colon	OK	0.58644	4.21477	2.8454	-3.17767	0.00148462	0.0206784	yes
XLOC_008174	Lynx1	chr15:74578285-74583409	CR_Ileum	CR_Colon	OK	0.194102	1.39219	2.84248	-4.2283	2.35464e-05	0.000608325	yes
XLOC_000477	BC026585	chr1:159382672-159418888	CR_Ileum	CR_Colon	OK	1.64561	11.6814	2.82752	-3.27688	0.00104963	0.0155862	yes
XLOC_004323	Mpp3	chr11:101860920-101888530	CR_Ileum	CR_Colon	OK	0.503127	3.56716	2.82578	-3.19825	0.00138262	0.01949	yes
XLOC_023953	Tmem231	chr8:114435917-114457691	CR_Ileum	CR_Colon	OK	0.141757	1.00123	2.82029	-3.7303	0.000191249	0.00374227	yes
XLOC_016850	Kif12	chr4:62826646-62833282	CR_Ileum	CR_Colon	OK	2.00115	14.0988	2.81668	-4.10024	4.12716e-05	0.000993359	yes
XLOC_005149	Inf2	chr12:113826982-113853768	CR_Ileum	CR_Colon	OK	1.03171	7.20669	2.80431	-4.03156	5.54083e-05	0.00128314	yes
XLOC_001396	-	chr1:78591519-78593479	CR_Ileum	CR_Colon	OK	0.0652889	0.455997	2.80412	-2.85144	0.00435213	0.0488551	yes
XLOC_012707	-	chr2:75618331-75629337	CR_Ileum	CR_Colon	OK	0.379394	2.63292	2.7949	-2.86259	0.00420195	0.0475602	yes
XLOC_009804	Ly6g6c	chr17:35204269-35206993	CR_Ileum	CR_Colon	OK	0.176582	1.21694	2.78485	-3.05804	0.00222793	0.0287991	yes
XLOC_007436	Dgkh	chr14:78959154-79132566	CR_Ileum	CR_Colon	OK	0.990284	6.80986	2.78171	-4.37763	1.19978e-05	0.000333844	yes
XLOC_015409	Slc50a1	chr3:89072167-89074492	CR_Ileum	CR_Colon	OK	12.3893	85.1144	2.78031	-5.48246	4.19454e-08	2.04239e-06	yes
XLOC_012934	Thbs1	chr2:117937590-117952869	CR_Ileum	CR_Colon	OK	0.807452	5.54159	2.77885	-4.98365	6.23965e-07	2.38974e-05	yes
XLOC_013026	Slc20a1	chr2:129022907-129037377	CR_Ileum	CR_Colon	OK	18.1225	124.09	2.77554	-5.3788	7.49842e-08	3.45352e-06	yes
XLOC_013276	Eya2	chr2:165480797-165597131	CR_Ileum	CR_Colon	OK	0.0826848	0.56596	2.77501	-3.25247	0.00114407	0.0167061	yes
XLOC_022285	Lrrc51	chr7:109060736-109082397	CR_Ileum	CR_Colon	OK	1.95226	13.2605	2.76392	-3.14412	0.00166587	0.0227217	yes
XLOC_018448	Tlr6	chr5:65344333-65351273	CR_Ileum	CR_Colon	OK	0.0751158	0.508031	2.75773	-3.16653	0.00154267	0.0213346	yes
XLOC_020713	Six5	chr7:19679531-19683839	CR_Ileum	CR_Colon	OK	0.405424	2.73535	2.75422	-3.57902	0.00034489	0.00617083	yes
XLOC_001791	1810043G02Rik	chr10:77441390-77449505	CR_Ileum	CR_Colon	OK	0.66608	4.48759	2.75218	-3.74144	0.000182966	0.00360145	yes
XLOC_017439	-	chr4:62817401-62820232	CR_Ileum	CR_Colon	OK	0.128922	0.867037	2.74959	-3.4149	0.000638061	0.0103682	yes
XLOC_004469	Timp2	chr11:118162374-118216725	CR_Ileum	CR_Colon	OK	0.285433	1.91479	2.74596	-4.10564	4.03202e-05	0.00097299	yes
XLOC_013436	Cacna1b	chr2:24459430-24618672	CR_Ileum	CR_Colon	OK	0.250338	1.6769	2.74385	-3.3881	0.000703785	0.0112486	yes
XLOC_001876	Ankrd24	chr10:81091194-81110357	CR_Ileum	CR_Colon	OK	0.683796	4.57475	2.74206	-3.44554	0.00056993	0.00944699	yes
XLOC_003254	Unc119	chr11:78157023-78162658	CR_Ileum	CR_Colon	OK	3.86506	25.8319	2.74059	-5.32913	9.86819e-08	4.4427e-06	yes
XLOC_022913	Lass4	chr8:4493022-4526455	CR_Ileum	CR_Colon	OK	2.3892	15.9209	2.73633	-5.61253	1.99393e-08	1.03533e-06	yes
XLOC_019448	Capg	chr6:72494432-72512974	CR_Ileum	CR_Colon	OK	4.44482	29.4255	2.72687	-5.22152	1.7746e-07	7.60258e-06	yes
XLOC_016039	Tmem8b	chr4:43681842-43705610	CR_Ileum	CR_Colon	OK	0.121058	0.801078	2.72625	-3.75087	0.000176221	0.00348878	yes
XLOC_012356	Itih5	chr2:10075169-10178156	CR_Ileum	CR_Colon	OK	2.73731	18.0692	2.7227	-6.55556	5.54341e-11	4.3419e-09	yes
XLOC_006573	-	chr13:49515431-49516423	CR_Ileum	CR_Colon	OK	0.327665	2.15401	2.71673	-3.4261	0.000612307	0.0100227	yes
XLOC_025266	Paqr5	chr9:61800812-61874654	CR_Ileum	CR_Colon	OK	2.27857	14.9546	2.71439	-5.09095	3.56269e-07	1.42978e-05	yes
XLOC_021128	Stard5	chr7:90780524-90884000	CR_Ileum	CR_Colon	OK	3.16972	20.7695	2.71204	-5.13416	2.83411e-07	1.16088e-05	yes
XLOC_022799	-	chr7:107323484-107324466	CR_Ileum	CR_Colon	OK	0.149794	0.978156	2.70708	-2.91621	0.00354312	0.0415461	yes
XLOC_018261	Gm15408	chr5:149818537-149824352	CR_Ileum	CR_Colon	OK	0.0891747	0.581287	2.70454	-2.87181	0.00408127	0.0464792	yes
XLOC_015431	S100a1	chr3:90314955-90318252	CR_Ileum	CR_Colon	OK	26.4212	172.047	2.70304	-6.36206	1.99071e-10	1.42691e-08	yes
XLOC_011192	Ecscr	chr18:35872742-35882020	CR_Ileum	CR_Colon	OK	0.700754	4.55988	2.70202	-3.78811	0.0001518	0.00307295	yes
XLOC_018921	Katnal1	chr5:149683159-149740529	CR_Ileum	CR_Colon	OK	0.10272	0.665224	2.69513	-3.66112	0.000251117	0.00471456	yes
XLOC_010033	Dync2li1	chr17:85025838-85054904	CR_Ileum	CR_Colon	OK	0.152391	0.981869	2.68775	-3.11867	0.00181672	0.0244161	yes
XLOC_019978	Fkbp14	chr6:54527598-54543901	CR_Ileum	CR_Colon	OK	0.435659	2.80263	2.68551	-3.18309	0.00145712	0.0203643	yes
XLOC_023068	Sorbs2	chr8:46593141-46913260	CR_Ileum	CR_Colon	OK	1.63096	10.4448	2.67899	-4.20074	2.6604e-05	0.000676462	yes
XLOC_017936	Brdt	chr5:107760212-107816077	CR_Ileum	CR_Colon	OK	0.0703617	0.45032	2.67809	-3.23913	0.00119894	0.0173375	yes
XLOC_000567	Vsig8	chr1:174486068-174493848	CR_Ileum	CR_Colon	OK	0.156094	0.997903	2.67648	-3.20067	0.0013711	0.0193644	yes
XLOC_019219	2310016C08Rik	chr6:29222487-29225449	CR_Ileum	CR_Colon	OK	1.55759	9.91061	2.66966	-4.22941	2.34306e-05	0.000605546	yes
XLOC_016107	Akap2	chr4:57827469-57909856	CR_Ileum	CR_Colon	OK	0.382956	2.42187	2.66087	-3.7485	0.000177896	0.00351637	yes
XLOC_023746	Abhd8	chr8:73980598-73987556	CR_Ileum	CR_Colon	OK	0.672789	4.25465	2.66081	-4.24439	2.1919e-05	0.00056966	yes
XLOC_008200	Nrbp2	chr15:75915957-75922453	CR_Ileum	CR_Colon	OK	4.85946	30.6729	2.6581	-5.64298	1.67136e-08	8.77685e-07	yes
XLOC_005458	Serpina9	chr12:105234829-105251862	CR_Ileum	CR_Colon	OK	0.164709	1.03304	2.6489	-3.20917	0.00133118	0.0188822	yes
XLOC_003394	Copz2	chr11:96711189-96722516	CR_Ileum	CR_Colon	OK	1.74793	10.9619	2.64878	-3.71192	0.000205694	0.00398561	yes
XLOC_017229	Klhdc7a	chr4:139517686-139525294	CR_Ileum	CR_Colon	OK	0.266512	1.66728	2.64522	-3.18599	0.00144261	0.020201	yes
XLOC_015052	F3	chr3:121425994-121438038	CR_Ileum	CR_Colon	OK	1.76005	10.9441	2.63646	-4.15494	3.25369e-05	0.000808439	yes
XLOC_022261	Neu3	chr7:106959948-106976927	CR_Ileum	CR_Colon	OK	0.247617	1.53591	2.63291	-3.93648	8.26858e-05	0.00181371	yes
XLOC_020007	Fam13a	chr6:58883529-58974496	CR_Ileum	CR_Colon	OK	1.4868	9.06435	2.60799	-5.42883	5.67248e-08	2.68836e-06	yes
XLOC_004481	-	chr11:119794208-119804036	CR_Ileum	CR_Colon	OK	0.245124	1.49438	2.60797	-3.12677	0.00176736	0.0238814	yes
XLOC_014205	Fer1l4	chr2:155844875-155878683	CR_Ileum	CR_Colon	OK	0.145772	0.877443	2.58959	-3.3278	0.000875331	0.0134363	yes
XLOC_010474	Apobec2	chr17:48557421-48572053	CR_Ileum	CR_Colon	OK	0.255951	1.54052	2.58948	-3.16791	0.00153538	0.0212483	yes
XLOC_010757	-	chr17:57414041-57414937	CR_Ileum	CR_Colon	OK	0.298103	1.79406	2.58935	-3.08046	0.00206682	0.0270938	yes
XLOC_003274	Rhbdl3	chr11:80114413-80169488	CR_Ileum	CR_Colon	OK	0.205544	1.23425	2.58612	-3.79351	0.000148531	0.00301723	yes
XLOC_002964	D930048N14Rik	chr11:51456590-51471183	CR_Ileum	CR_Colon	OK	0.613179	3.67576	2.58366	-3.27217	0.00106725	0.0157899	yes
XLOC_013696	Calcrl	chr2:84170782-84265423	CR_Ileum	CR_Colon	OK	0.065741	0.393156	2.58024	-3.2512	0.0011492	0.0167722	yes
XLOC_024047	-	chr8:18886814-18891274	CR_Ileum	CR_Colon	OK	0.0811437	0.479022	2.56154	-3.36965	0.000752637	0.0118865	yes
XLOC_008078	-	chr15:36559456-36575005	CR_Ileum	CR_Colon	OK	0.144898	0.85509	2.56104	-3.50379	0.000458695	0.00785767	yes
XLOC_023896	Zdhhc1	chr8:107996103-108020962	CR_Ileum	CR_Colon	OK	2.17471	12.8168	2.55914	-3.11627	0.00183156	0.0245785	yes
XLOC_007761	Ly6e	chr15:74785474-74798604	CR_Ileum	CR_Colon	OK	1.77393	10.4386	2.55691	-3.32263	0.000891731	0.0136391	yes
XLOC_013491	Slc2a6	chr2:26876884-26883518	CR_Ileum	CR_Colon	OK	0.140608	0.823023	2.54926	-2.97926	0.00288945	0.0353512	yes
XLOC_022570	-	chr7:137055439-137081749	CR_Ileum	CR_Colon	OK	0.2528	1.4778	2.54738	-2.86185	0.00421176	0.0476428	yes
XLOC_005912	Dapk1	chr13:60703307-60864547	CR_Ileum	CR_Colon	OK	0.460001	2.67931	2.54215	-3.55718	0.00037485	0.00661313	yes
XLOC_019778	Rep15	chr6:146981058-146982040	CR_Ileum	CR_Colon	OK	10.5252	61.0075	2.53513	-5.64459	1.65577e-08	8.70319e-07	yes
XLOC_007062	Clybl	chr14:122580915-122850368	CR_Ileum	CR_Colon	OK	6.2782	36.2546	2.52974	-5.3912	6.99902e-08	3.24098e-06	yes
XLOC_017733	Hgfac	chr5:35384198-35391085	CR_Ileum	CR_Colon	OK	14.1738	81.6059	2.52544	-5.87111	4.32883e-09	2.5139e-07	yes
XLOC_012101	Blnk	chr19:41002844-41069025	CR_Ileum	CR_Colon	OK	6.12741	35.1625	2.52069	-5.25955	1.44407e-07	6.28843e-06	yes
XLOC_007335	Phf11	chr14:59895749-59916359	CR_Ileum	CR_Colon	OK	0.432456	2.47457	2.51655	-3.14541	0.00165855	0.0226355	yes
XLOC_017734	Dok7	chr5:35399526-35430489	CR_Ileum	CR_Colon	OK	0.47408	2.70379	2.51178	-3.11889	0.00181533	0.0244034	yes
XLOC_016759	Gne	chr4:44025514-44097049	CR_Ileum	CR_Colon	OK	19.6164	111.382	2.50538	-2.91941	0.00350698	0.041213	yes
XLOC_010792	-	chr17:84425809-84428394	CR_Ileum	CR_Colon	OK	0.123813	0.702401	2.50413	-3.13614	0.00171186	0.023253	yes
XLOC_013410	Rsu1	chr2:12998635-13192905	CR_Ileum	CR_Colon	OK	2.05104	11.6125	2.50126	-4.38935	1.1369e-05	0.000318341	yes
XLOC_008969	Mrps6,Slc5a3	chr16:92058566-92112472	CR_Ileum	CR_Colon	OK	12.5913	71.1414	2.49827	-4.44468	8.80219e-06	0.000254324	yes
XLOC_009384	Tmprss2	chr16:97786285-97833158	CR_Ileum	CR_Colon	OK	32.9926	184.817	2.48589	-4.84083	1.29301e-06	4.59553e-05	yes
XLOC_000573	Aim2	chr1:175349140-175396274	CR_Ileum	CR_Colon	OK	3.64373	20.3124	2.47887	-4.04071	5.32903e-05	0.00123991	yes
XLOC_021997	Clec11a	chr7:51559135-51562329	CR_Ileum	CR_Colon	OK	0.106759	0.594703	2.47782	-2.90833	0.00363365	0.0424089	yes
XLOC_007472	Sox21	chr14:118632455-118637245	CR_Ileum	CR_Colon	OK	0.200619	1.11343	2.47247	-3.18437	0.00145067	0.0202966	yes
XLOC_000285	Ramp1	chr1:93076398-93121773	CR_Ileum	CR_Colon	OK	6.14906	34.1164	2.47203	-3.23715	0.00120731	0.0174393	yes
XLOC_012102	-	chr19:41077825-41083746	CR_Ileum	CR_Colon	OK	0.267194	1.47945	2.4691	-3.28874	0.00100636	0.0150454	yes
XLOC_007675	Dnahc5	chr15:28133520-28401800	CR_Ileum	CR_Colon	OK	0.0673654	0.372595	2.46753	-3.7243	0.000195861	0.00381989	yes
XLOC_003465	Wnk4	chr11:101121880-101139230	CR_Ileum	CR_Colon	OK	2.69209	14.7682	2.45569	-5.16363	2.42203e-07	1.0045e-05	yes
XLOC_008244	Tst	chr15:78229985-78236289	CR_Ileum	CR_Colon	OK	27.5499	151.05	2.45491	-6.11478	9.6688e-10	6.21813e-08	yes
XLOC_010974	Tnfaip8	chr18:50139080-50252883	CR_Ileum	CR_Colon	OK	1.8855	10.3325	2.45418	-4.42085	9.83117e-06	0.000280551	yes
XLOC_021592	6030429G01Rik	chr7:4474558-4484044	CR_Ileum	CR_Colon	OK	0.0961456	0.526424	2.45293	-2.85645	0.00428406	0.0482812	yes
XLOC_008815	Muc4	chr16:32735971-32797521	CR_Ileum	CR_Colon	OK	2.84664	15.4859	2.44362	-4.52947	5.91314e-06	0.000179077	yes
XLOC_014872	S100a6	chr3:90412443-90428404	CR_Ileum	CR_Colon	OK	237.852	1292.62	2.44216	-5.51357	3.51635e-08	1.7373e-06	yes
XLOC_014296	Tmem189	chr2:167468102-167487065	CR_Ileum	CR_Colon	OK	4.56205	24.7844	2.44168	-4.91123	9.05051e-07	3.33449e-05	yes
XLOC_003033	4933439C10Rik	chr11:59298993-59324569	CR_Ileum	CR_Colon	OK	2.12521	11.5335	2.44015	-3.11571	0.00183503	0.0246161	yes
XLOC_017216	Pla2g2f	chr4:138306447-138326550	CR_Ileum	CR_Colon	OK	1.97329	10.662	2.4338	-4.20766	2.5803e-05	0.000658583	yes
XLOC_025982	Plxna3	chrX:71574404-71590028	CR_Ileum	CR_Colon	OK	0.188513	1.01528	2.42915	-3.0725	0.00212275	0.0276783	yes
XLOC_012744	Slc43a3	chr2:84776812-84798666	CR_Ileum	CR_Colon	OK	0.127011	0.682493	2.42586	-2.87047	0.00409864	0.0466303	yes
XLOC_008270	Sun2	chr15:79554486-79573944	CR_Ileum	CR_Colon	OK	3.81271	20.4618	2.42404	-5.12722	2.94059e-07	1.19963e-05	yes
XLOC_005060	Eml1	chr12:109648864-109777774	CR_Ileum	CR_Colon	OK	0.138363	0.740106	2.41928	-3.20924	0.00133087	0.0188792	yes
XLOC_003341	Cuedc1	chr11:87912647-88007642	CR_Ileum	CR_Colon	OK	1.32524	7.0886	2.41925	-3.35803	0.000785004	0.0122876	yes
XLOC_010718	-	chr17:34741968-34742679	CR_Ileum	CR_Colon	OK	0.968019	5.17226	2.41769	-3.40276	0.000667077	0.0107558	yes
XLOC_001721	Gm5424	chr10:61533769-61535319	CR_Ileum	CR_Colon	OK	1.16994	6.20717	2.40751	-3.94466	7.99133e-05	0.00176016	yes
XLOC_015712	Prkacb	chr3:146392542-146475910	CR_Ileum	CR_Colon	OK	3.24399	17.17	2.40405	-5.15234	2.57258e-07	1.06198e-05	yes
XLOC_018111	Kctd7	chr5:130620757-130631678	CR_Ileum	CR_Colon	OK	0.229868	1.21462	2.40162	-3.66769	0.000244755	0.00461368	yes
XLOC_013876	Creb3l1	chr2:91822483-91864757	CR_Ileum	CR_Colon	OK	20.4777	107.928	2.39794	-5.55689	2.74617e-08	1.38607e-06	yes
XLOC_008060	LOC100616095	chr15:32170322-32174417	CR_Ileum	CR_Colon	OK	6.16006	31.9992	2.37702	-5.20074	1.98493e-07	8.40317e-06	yes
XLOC_004484	Azi1	chr11:119925743-119948141	CR_Ileum	CR_Colon	OK	0.590824	3.05896	2.37224	-4.02678	5.65461e-05	0.00130527	yes
XLOC_008338	Pkdrej	chr15:85645105-85652163	CR_Ileum	CR_Colon	OK	0.0775666	0.395875	2.35154	-3.23383	0.00122142	0.0175995	yes
XLOC_026690	Mageh1	chrX:149470708-149472106	CR_Ileum	CR_Colon	OK	0.849655	4.3361	2.35145	-3.59667	0.000322322	0.00583138	yes
XLOC_023730	Gdf15	chr8:73153292-73162855	CR_Ileum	CR_Colon	OK	1.40202	7.15051	2.35054	-3.37932	0.000726642	0.0115458	yes
XLOC_011090	Pqlc1	chr18:80451972-80489536	CR_Ileum	CR_Colon	OK	3.86686	19.5761	2.33986	-3.63916	0.000273525	0.00506489	yes
XLOC_010584	Cdc42ep3	chr17:79733099-79755129	CR_Ileum	CR_Colon	OK	1.28216	6.48596	2.33874	-3.18248	0.00146018	0.0204008	yes
XLOC_011800	Adra2a	chr19:54118970-54123751	CR_Ileum	CR_Colon	OK	1.43183	7.2315	2.33644	-4.06593	4.7842e-05	0.00112911	yes
XLOC_000421	Phlda3	chr1:137662661-137665711	CR_Ileum	CR_Colon	OK	0.252794	1.27521	2.3347	-2.97722	0.00290872	0.035536	yes
XLOC_002420	Appl2	chr10:83062775-83111580	CR_Ileum	CR_Colon	OK	22.5539	113.687	2.33363	-4.98197	6.29412e-07	2.40765e-05	yes
XLOC_000055	Ptpn18	chr1:34516590-34530655	CR_Ileum	CR_Colon	OK	12.9958	65.1114	2.32487	-4.7718	1.82586e-06	6.27443e-05	yes
XLOC_024309	Slc44a2	chr9:21125162-21159704	CR_Ileum	CR_Colon	OK	2.20205	11.0166	2.32276	-4.45225	8.49739e-06	0.000246543	yes
XLOC_020685	Pnmal2	chr7:17530030-17534177	CR_Ileum	CR_Colon	OK	0.305714	1.52896	2.3223	-3.62945	0.000284029	0.00523464	yes
XLOC_014745	Aadac	chr3:59835709-59844123	CR_Ileum	CR_Colon	OK	9.47023	47.0771	2.31355	-4.51681	6.27776e-06	0.000188903	yes
XLOC_002841	-	chr11:20353092-20356011	CR_Ileum	CR_Colon	OK	0.227434	1.12834	2.31068	-3.31614	0.000912706	0.0139035	yes
XLOC_023361	Pla2g15	chr8:108674286-108688615	CR_Ileum	CR_Colon	OK	0.514613	2.53695	2.30153	-2.87844	0.00399641	0.0457355	yes
XLOC_010746	-	chr17:48178237-48179830	CR_Ileum	CR_Colon	OK	0.469171	2.30746	2.29812	-3.34244	0.000830468	0.0128639	yes
XLOC_009180	Fam162a	chr16:36043929-36071601	CR_Ileum	CR_Colon	OK	27.1832	133.178	2.29257	-5.4554	4.88624e-08	2.34526e-06	yes
XLOC_001907	Nt5dc3	chr10:86241749-86301134	CR_Ileum	CR_Colon	OK	0.513164	2.50909	2.28967	-4.04195	5.30087e-05	0.00123452	yes
XLOC_023148	-	chr8:73218917-73220758	CR_Ileum	CR_Colon	OK	0.206668	1.00993	2.28886	-3.00389	0.00266556	0.0332045	yes
XLOC_013628	Gcg	chr2:62312586-62321715	CR_Ileum	CR_Colon	OK	4.84293	23.6045	2.28511	-3.75743	0.000171667	0.00341172	yes
XLOC_021827	Grik5	chr7:25794868-25862106	CR_Ileum	CR_Colon	OK	0.982307	4.77684	2.28181	-3.30141	0.000962017	0.0145044	yes
XLOC_017830	-	chr5:76072139-76081267	CR_Ileum	CR_Colon	OK	0.194724	0.945672	2.27991	-3.02499	0.00248642	0.0314517	yes
XLOC_012068	Ankrd22	chr19:34175432-34240559	CR_Ileum	CR_Colon	OK	0.547775	2.66019	2.27987	-3.31023	0.000932207	0.0141317	yes
XLOC_017940	A830010M20Rik	chr5:107924599-107941575	CR_Ileum	CR_Colon	OK	0.283824	1.37599	2.2774	-3.0413	0.0023556	0.0301083	yes
XLOC_014989	Dennd2c	chr3:102906576-102973656	CR_Ileum	CR_Colon	OK	0.0663242	0.320764	2.27391	-2.90593	0.00366158	0.0426888	yes
XLOC_004307	Ptrf	chr11:100818050-100831931	CR_Ileum	CR_Colon	OK	0.120704	0.583591	2.27349	-2.99082	0.00278227	0.0343216	yes
XLOC_012834	C1qtnf4	chr2:90725942-90730683	CR_Ileum	CR_Colon	OK	0.260435	1.25646	2.27036	-2.87818	0.00399978	0.0457623	yes
XLOC_003134	Ybx2	chr11:69749400-69755101	CR_Ileum	CR_Colon	OK	6.61562	31.8965	2.26945	-3.675	0.000237854	0.00450539	yes
XLOC_001294	Capn2	chr1:184397384-184447614	CR_Ileum	CR_Colon	OK	4.09994	19.7154	2.26565	-4.88757	1.02086e-06	3.71808e-05	yes
XLOC_023846	Ces1g	chr8:95826230-95861203	CR_Ileum	CR_Colon	OK	2.56091	12.3062	2.26465	-4.18623	2.83622e-05	0.000715923	yes
XLOC_003713	Slc1a4	chr11:20202182-20232720	CR_Ileum	CR_Colon	OK	2.12285	10.1886	2.26288	-4.44771	8.67905e-06	0.000251256	yes
XLOC_000338	Serpinb5	chr1:108757713-108779925	CR_Ileum	CR_Colon	OK	4.25835	20.3112	2.25391	-4.68915	2.74342e-06	9.02811e-05	yes
XLOC_023895	Tppp3	chr8:107991391-107995322	CR_Ileum	CR_Colon	OK	9.0659	43.2103	2.25285	-4.60249	4.17461e-06	0.000131664	yes
XLOC_021933	Fxyd3	chr7:31844953-31861716	CR_Ileum	CR_Colon	OK	20.9822	99.4768	2.2452	-4.57388	4.78774e-06	0.0001487	yes
XLOC_019679	Scnn1a	chr6:125269632-125294960	CR_Ileum	CR_Colon	OK	5.66616	26.6865	2.23567	-5.37962	7.4643e-08	3.44066e-06	yes
XLOC_020679	Slc1a5	chr7:17348575-17383623	CR_Ileum	CR_Colon	OK	36.6975	172.692	2.23445	-4.75547	1.97987e-06	6.74941e-05	yes
XLOC_007849	Sgsm3	chr15:80808194-81021187	CR_Ileum	CR_Colon	OK	7.25716	34.1488	2.23436	-4.19984	2.67105e-05	0.000678704	yes
XLOC_004061	Nxn	chr11:76070727-76212643	CR_Ileum	CR_Colon	OK	0.122176	0.573552	2.23096	-2.86596	0.00415741	0.0471602	yes
XLOC_019927	Fam115a	chr6:42618045-42643111	CR_Ileum	CR_Colon	OK	0.544492	2.55389	2.22971	-3.07392	0.00211268	0.0275698	yes
XLOC_022881	-	chr7:148856793-148859343	CR_Ileum	CR_Colon	OK	0.34721	1.62749	2.22877	-3.28133	0.00103317	0.01538	yes
XLOC_009215	Sidt1	chr16:44239752-44333274	CR_Ileum	CR_Colon	OK	2.07071	9.68839	2.22613	-4.20736	2.58376e-05	0.000659315	yes
XLOC_020171	Srgap3	chr6:112667965-112897293	CR_Ileum	CR_Colon	OK	0.225028	1.05278	2.22603	-3.26619	0.00109006	0.0160738	yes
XLOC_001823	Kiss1r	chr10:79379715-79386789	CR_Ileum	CR_Colon	OK	0.128943	0.600886	2.22036	-3.13247	0.00173343	0.0235087	yes
XLOC_016333	Scmh1	chr4:120077881-120202804	CR_Ileum	CR_Colon	OK	3.18918	14.8529	2.21948	-3.40548	0.000660484	0.01067	yes
XLOC_012538	Ass1	chr2:31325789-31376190	CR_Ileum	CR_Colon	OK	1.01775	4.72982	2.2164	-3.56871	0.00035875	0.00637924	yes
XLOC_009218	-	chr16:44719096-44721068	CR_Ileum	CR_Colon	OK	0.262499	1.21795	2.21408	-2.99451	0.00274888	0.0339872	yes
XLOC_004667	-	chr11:94010029-94013885	CR_Ileum	CR_Colon	OK	0.113308	0.52518	2.21257	-2.95116	0.00316584	0.0379714	yes
XLOC_017739	Afap1	chr5:36235967-36346571	CR_Ileum	CR_Colon	OK	0.383845	1.7727	2.20735	-3.49084	0.000481506	0.00818217	yes
XLOC_009257	St3gal6	chr16:58408647-58524840	CR_Ileum	CR_Colon	OK	14.8127	68.2711	2.20444	-3.91576	9.01196e-05	0.00195492	yes
XLOC_014840	Efna3	chr3:89106726-89126843	CR_Ileum	CR_Colon	OK	1.79635	8.27319	2.20338	-3.06779	0.00215646	0.0280472	yes
XLOC_014308	-	chr2:170017792-170019639	CR_Ileum	CR_Colon	OK	0.236935	1.08818	2.19936	-2.88857	0.00386995	0.0445708	yes
XLOC_023661	Fam149a	chr8:46422068-46467645	CR_Ileum	CR_Colon	OK	0.237232	1.08712	2.19614	-3.28362	0.00102481	0.015278	yes
XLOC_017083	1700029G01Rik	chr4:125827742-125840979	CR_Ileum	CR_Colon	OK	6.46412	29.5937	2.19477	-4.49008	7.11978e-06	0.000211067	yes
XLOC_006445	Rgnef	chr13:98668549-98976458	CR_Ileum	CR_Colon	OK	2.4204	11.0805	2.19471	-4.75992	1.93673e-06	6.61656e-05	yes
XLOC_024505	Il18	chr9:50341191-50389947	CR_Ileum	CR_Colon	OK	15.4614	70.7624	2.19431	-2.98397	0.00284534	0.0349328	yes
XLOC_022266	Kcne3	chr7:107324592-107335451	CR_Ileum	CR_Colon	OK	2.2677	10.3325	2.18789	-3.37828	0.000729412	0.0115807	yes
XLOC_023427	Atp2c2	chr8:122223908-122282834	CR_Ileum	CR_Colon	OK	5.10556	23.228	2.18573	-4.92441	8.46162e-07	3.14365e-05	yes
XLOC_014616	Fam164a	chr3:7503425-7553848	CR_Ileum	CR_Colon	OK	0.494772	2.24014	2.17876	-3.44413	0.000572902	0.00948705	yes
XLOC_009025	Emp2	chr16:10281841-10314115	CR_Ileum	CR_Colon	OK	3.8257	17.2686	2.17436	-4.70713	2.51234e-06	8.35432e-05	yes
XLOC_009077	Zdhhc8	chr16:18220845-18235229	CR_Ileum	CR_Colon	OK	0.415366	1.87306	2.17294	-3.20181	0.00136566	0.0192999	yes
XLOC_014866	S100a16	chr3:90341144-90347311	CR_Ileum	CR_Colon	OK	28.3813	127.956	2.17264	-5.03351	4.8159e-07	1.88644e-05	yes
XLOC_006878	Mmp14	chr14:55050225-55061136	CR_Ileum	CR_Colon	OK	3.66484	16.4748	2.16844	-4.71163	2.4574e-06	8.19248e-05	yes
XLOC_000647	Ptpn14	chr1:191552146-191700572	CR_Ileum	CR_Colon	OK	0.10216	0.457745	2.16371	-3.25435	0.0011365	0.0166131	yes
XLOC_007682	Sdc2	chr15:32850477-32964476	CR_Ileum	CR_Colon	OK	1.82786	8.1759	2.16122	-4.35921	1.30534e-05	0.000359792	yes
XLOC_009174	Pdia5	chr16:35397397-35490959	CR_Ileum	CR_Colon	OK	9.14424	40.7445	2.15567	-4.96761	6.77834e-07	2.57246e-05	yes
XLOC_020270	Cd9	chr6:125410283-125444773	CR_Ileum	CR_Colon	OK	68.6042	303.898	2.14722	-5.47476	4.38097e-08	2.12292e-06	yes
XLOC_023854	Pllp	chr8:97198794-97220183	CR_Ileum	CR_Colon	OK	10.8774	48.1031	2.1448	-4.72731	2.27513e-06	7.64912e-05	yes
XLOC_001325	Nenf	chr1:193130675-193141997	CR_Ileum	CR_Colon	OK	6.57029	29.031	2.14356	-3.90453	9.44086e-05	0.00203484	yes
XLOC_023332	Ces2g	chr8:107485538-107493437	CR_Ileum	CR_Colon	OK	1.97519	8.62615	2.12673	-4.21458	2.50239e-05	0.00064172	yes
XLOC_016809	D630039A03Rik	chr4:57921255-57929760	CR_Ileum	CR_Colon	OK	10.5364	45.9663	2.1252	-5.22461	1.74525e-07	7.49128e-06	yes
XLOC_011193	Tmem173	chr18:35893331-35900208	CR_Ileum	CR_Colon	OK	0.834969	3.63985	2.12409	-3.28272	0.0010281	0.0153158	yes
XLOC_015102	Slc39a8	chr3:135488454-135551536	CR_Ileum	CR_Colon	OK	1.54402	6.71669	2.12106	-3.53617	0.000405973	0.00707787	yes
XLOC_006535	-	chr13:21350435-21354146	CR_Ileum	CR_Colon	OK	0.135649	0.588724	2.11771	-2.84687	0.00441516	0.0494102	yes
XLOC_024755	Nphp3	chr9:103904873-103946141	CR_Ileum	CR_Colon	OK	0.453883	1.96583	2.11475	-3.03418	0.00241188	0.0306917	yes
XLOC_004425	C630004H02Rik	chr11:115209006-115229058	CR_Ileum	CR_Colon	OK	11.1016	48.0517	2.11382	-4.10696	4.00895e-05	0.000967844	yes
XLOC_000811	Satb2	chr1:56850824-57038477	CR_Ileum	CR_Colon	OK	8.46871	36.5063	2.10793	-4.47812	7.53016e-06	0.000221759	yes
XLOC_009310	Btg3	chr16:78360104-78377030	CR_Ileum	CR_Colon	OK	1.76727	7.58691	2.10199	-2.9705	0.00297314	0.0361699	yes
XLOC_024629	-	chr9:67844812-67846458	CR_Ileum	CR_Colon	OK	3.07348	13.1231	2.09417	-3.36656	0.000761112	0.0119922	yes
XLOC_009524	Agpat4	chr17:12311681-12412506	CR_Ileum	CR_Colon	OK	7.31441	30.8205	2.07508	-4.55897	5.14059e-06	0.000158397	yes
XLOC_009511	Tagap	chr17:8118864-8127762	CR_Ileum	CR_Colon	OK	0.559229	2.34971	2.07097	-3.32979	0.000869125	0.0133587	yes
XLOC_015238	Anxa5	chr3:36347845-36374809	CR_Ileum	CR_Colon	OK	4.85959	20.3736	2.0678	-4.00963	6.08132e-05	0.00139277	yes
XLOC_024078	-	chr8:25626417-25637913	CR_Ileum	CR_Colon	OK	0.193773	0.808708	2.06125	-3.45456	0.000551183	0.00918009	yes
XLOC_007967	Mettl7a1	chr15:100134619-100144875	CR_Ileum	CR_Colon	OK	18.6718	77.7078	2.0572	-5.15286	2.56549e-07	1.05944e-05	yes
XLOC_000617	Tmem63a	chr1:182872594-182905235	CR_Ileum	CR_Colon	OK	10.8126	44.943	2.05538	-5.23271	1.67039e-07	7.19079e-06	yes
XLOC_017152	Sytl1	chr4:132809004-132819015	CR_Ileum	CR_Colon	OK	9.44103	39.1538	2.05214	-4.70158	2.58156e-06	8.55123e-05	yes
XLOC_001238	4933439K11Rik	chr1:174451260-174480937	CR_Ileum	CR_Colon	OK	0.436161	1.80444	2.04862	-3.06558	0.00217249	0.0282124	yes
XLOC_000227	Acsl3,Utp14b	chr1:78654388-78704318	CR_Ileum	CR_Colon	OK	9.7146	40.1039	2.04552	-4.37138	1.23466e-05	0.000342222	yes
XLOC_021711	Hif3a	chr7:17616313-17647776	CR_Ileum	CR_Colon	OK	0.208794	0.859146	2.04082	-2.98559	0.00283029	0.034808	yes
XLOC_002333	Pfkl	chr10:77449693-77472541	CR_Ileum	CR_Colon	OK	10.679	43.932	2.04049	-4.9806	6.3387e-07	2.42178e-05	yes
XLOC_006825	Peli2	chr14:48740505-48880558	CR_Ileum	CR_Colon	OK	0.627568	2.57996	2.03951	-3.47306	0.000514557	0.00865705	yes
XLOC_025551	C85492	chr9:121890582-121905144	CR_Ileum	CR_Colon	OK	1.2122	4.98002	2.03852	-3.09051	0.00199814	0.0263459	yes
XLOC_009894	Enpp5	chr17:44215794-44223510	CR_Ileum	CR_Colon	OK	3.03053	12.4425	2.03763	-3.96049	7.47965e-05	0.00166463	yes
XLOC_010027	Pkdcc	chr17:83614622-83624409	CR_Ileum	CR_Colon	OK	12.2007	49.988	2.03462	-4.13567	3.53918e-05	0.000868591	yes
XLOC_010206	Fam195a	chr17:26000642-26005691	CR_Ileum	CR_Colon	OK	8.29019	33.9611	2.0344	-3.62582	0.000288051	0.00529809	yes
XLOC_011759	Lzts2	chr19:45088659-45120262	CR_Ileum	CR_Colon	OK	8.04607	32.9204	2.03263	-4.13716	3.51634e-05	0.000864036	yes
XLOC_003105	Slc25a35	chr11:68781571-68790526	CR_Ileum	CR_Colon	OK	6.6963	27.3649	2.03089	-3.71428	0.000203783	0.00395479	yes
XLOC_019813	Ica1	chr6:8580526-8728519	CR_Ileum	CR_Colon	OK	4.40114	17.9646	2.02921	-3.53115	0.000413764	0.00719056	yes
XLOC_020346	Mansc1	chr6:134554027-134583544	CR_Ileum	CR_Colon	OK	6.09356	24.8651	2.02877	-4.09217	4.27361e-05	0.00102373	yes
XLOC_003462	Cntnap1	chr11:101034311-101052207	CR_Ileum	CR_Colon	OK	0.855473	3.47944	2.02406	-3.25113	0.00114949	0.0167754	yes
XLOC_026541	Maged1	chrX:91780807-91787458	CR_Ileum	CR_Colon	OK	5.10337	20.7328	2.02239	-4.54966	5.37337e-06	0.000164634	yes
XLOC_005144	Aspg	chr12:113344893-113365923	CR_Ileum	CR_Colon	OK	6.40323	25.9985	2.02156	-4.12849	3.65147e-05	0.000891467	yes
XLOC_014864	S100a13	chr3:90318681-90328503	CR_Ileum	CR_Colon	OK	11.2557	45.463	2.01404	-4.10926	3.9693e-05	0.000959312	yes
XLOC_013638	Ttc21b	chr2:66022385-66094674	CR_Ileum	CR_Colon	OK	0.522369	2.10775	2.01256	-3.38785	0.00070442	0.0112561	yes
XLOC_016256	Ttc39a	chr4:109079704-109117350	CR_Ileum	CR_Colon	OK	10.1865	41.053	2.01082	-4.93378	8.06512e-07	3.01145e-05	yes
XLOC_022634	Ifitm3	chr7:148195488-148196643	CR_Ileum	CR_Colon	OK	8.88229	35.7724	2.00984	-3.55038	0.000384669	0.00676326	yes
XLOC_023540	Gas6	chr8:13465373-13494535	CR_Ileum	CR_Colon	OK	54.9927	219.338	1.99585	-4.13915	3.48597e-05	0.000858283	yes
XLOC_000220	Tmem198	chr1:75476106-75482268	CR_Ileum	CR_Colon	OK	0.345883	1.37912	1.99539	-2.85811	0.0042617	0.0480731	yes
XLOC_022047	Fut2	chr7:52903920-52921848	CR_Ileum	CR_Colon	OK	10.6325	42.3536	1.994	-2.96625	0.00301455	0.0365675	yes
XLOC_025457	Sema3f	chr9:107583832-107612806	CR_Ileum	CR_Colon	OK	0.207067	0.822879	1.99058	-2.87954	0.00398257	0.045601	yes
XLOC_003004	Zfp692	chr11:58120247-58143815	CR_Ileum	CR_Colon	OK	6.63722	26.3523	1.98928	-3.67162	0.000241019	0.00455284	yes
XLOC_021158	Prcp	chr7:100023762-100083091	CR_Ileum	CR_Colon	OK	3.65386	14.4079	1.97937	-4.42409	9.68491e-06	0.000276804	yes
XLOC_011202	Cd14	chr18:36884720-36886308	CR_Ileum	CR_Colon	OK	5.65436	22.2656	1.97738	-4.24634	2.17296e-05	0.000565333	yes
XLOC_023396	Znrf1	chr8:114060003-114154222	CR_Ileum	CR_Colon	OK	1.99973	7.86518	1.97567	-3.12226	0.00179469	0.0241815	yes
XLOC_010510	Ptprs	chr17:56551768-56615903	CR_Ileum	CR_Colon	OK	1.84881	7.24714	1.97081	-3.55463	0.000378508	0.0066697	yes
XLOC_016485	Rnf186	chr4:138514638-138525885	CR_Ileum	CR_Colon	OK	33.1097	129.677	1.9696	-4.58024	4.64442e-06	0.000144898	yes
XLOC_022247	B3gnt6	chr7:105340924-105358111	CR_Ileum	CR_Colon	OK	3.67256	14.3758	1.96878	-4.16391	3.12841e-05	0.0007806	yes
XLOC_001973	Csrp2	chr10:110357231-110376570	CR_Ileum	CR_Colon	OK	52.5571	205.099	1.96436	-5.13938	2.75646e-07	1.1322e-05	yes
XLOC_016323	Slc2a1	chr4:118781349-118809934	CR_Ileum	CR_Colon	OK	9.01858	35.1334	1.96187	-4.80938	1.51402e-06	5.30377e-05	yes
XLOC_000548	Tstd1	chr1:173349163-173350483	CR_Ileum	CR_Colon	OK	60.1388	233.526	1.95722	-4.98692	6.13494e-07	2.35446e-05	yes
XLOC_014201	Fam83c	chr2:155652915-155660695	CR_Ileum	CR_Colon	OK	0.92579	3.58746	1.95421	-3.12054	0.00180522	0.0242969	yes
XLOC_010985	Snx24	chr18:53405315-53550565	CR_Ileum	CR_Colon	OK	2.55218	9.87697	1.95234	-2.98316	0.00285292	0.0350045	yes
XLOC_001106	Pla2g4a	chr1:151676751-151808414	CR_Ileum	CR_Colon	OK	3.66389	14.1463	1.94897	-3.95609	7.6188e-05	0.00169085	yes
XLOC_008293	Pmm1	chr15:81781535-81791297	CR_Ileum	CR_Colon	OK	5.72018	22.0667	1.94774	-3.533	0.000410874	0.00714985	yes
XLOC_026270	Plp2	chrX:7234515-7248524	CR_Ileum	CR_Colon	OK	57.12	220.062	1.94584	-4.03018	5.5733e-05	0.00128999	yes
XLOC_021130	-	chr7:91677498-91732215	CR_Ileum	CR_Colon	OK	0.296045	1.1392	1.94413	-3.19779	0.00138487	0.0195155	yes
XLOC_015425	Creb3l4	chr3:90040080-90047434	CR_Ileum	CR_Colon	OK	6.67175	25.6008	1.94005	-3.8711	0.000108343	0.00229466	yes
XLOC_014586	-	chr2:167603006-167608992	CR_Ileum	CR_Colon	OK	0.290755	1.11346	1.93718	-3.1088	0.00187851	0.0250558	yes
XLOC_019520	Mgll	chr6:88674405-88778354	CR_Ileum	CR_Colon	OK	1.94131	7.43118	1.93656	-3.26005	0.00111394	0.0163618	yes
XLOC_000783	Slc40a1	chr1:45964914-45985131	CR_Ileum	CR_Colon	OK	10.0252	38.2373	1.93136	-4.76719	1.8681e-06	6.40769e-05	yes
XLOC_004172	Abcc3	chr11:94204423-94254331	CR_Ileum	CR_Colon	OK	17.6494	67.09	1.92648	-3.51842	0.000434132	0.00749294	yes
XLOC_022497	Ern2	chr7:129302171-129329730	CR_Ileum	CR_Colon	OK	12.727	48.1246	1.91888	-4.00523	6.19561e-05	0.00141588	yes
XLOC_011657	Vldlr	chr19:27291386-27328805	CR_Ileum	CR_Colon	OK	0.550105	2.06717	1.90988	-2.94594	0.00321979	0.0384557	yes
XLOC_025549	Higd1a	chr9:121757677-121767118	CR_Ileum	CR_Colon	OK	69.02	258.945	1.90756	-3.79137	0.000149817	0.00303891	yes
XLOC_003078	2810001G20Rik	chr11:63892985-63896761	CR_Ileum	CR_Colon	OK	2.08277	7.76941	1.8993	-2.99433	0.00275046	0.0339935	yes
XLOC_011234	Mcc	chr18:44584713-44971836	CR_Ileum	CR_Colon	OK	0.859224	3.19548	1.89493	-3.61124	0.000304742	0.0055586	yes
XLOC_017604	Slc25a40	chr5:8422849-8455154	CR_Ileum	CR_Colon	OK	2.18794	8.12977	1.89364	-3.07654	0.0020942	0.0273784	yes
XLOC_011739	Marveld1	chr19:42221878-42226193	CR_Ileum	CR_Colon	OK	0.549358	2.03373	1.88831	-3.00934	0.00261818	0.0327116	yes
XLOC_024689	Bckdhb	chr9:83818743-84017847	CR_Ileum	CR_Colon	OK	2.8674	10.6132	1.88804	-2.94945	0.00318337	0.0381446	yes
XLOC_016414	Mecr	chr4:131399383-131423702	CR_Ileum	CR_Colon	OK	14.1344	52.3121	1.88793	-4.19972	2.67243e-05	0.000678976	yes
XLOC_015586	Gstm4	chr3:107843325-107847777	CR_Ileum	CR_Colon	OK	2.58674	9.56749	1.88701	-3.01799	0.00254458	0.0320067	yes
XLOC_025321	Gm5918	chr9:72827532-72833183	CR_Ileum	CR_Colon	OK	2.02405	7.4759	1.88501	-2.86041	0.00423096	0.0478065	yes
XLOC_016968	-	chr4:109074880-109079685	CR_Ileum	CR_Colon	OK	2.16096	7.95887	1.88089	-3.02934	0.00245089	0.0310866	yes
XLOC_015036	Vav3	chr3:109143600-109488612	CR_Ileum	CR_Colon	OK	1.17429	4.31553	1.87775	-3.20125	0.00136831	0.0193324	yes
XLOC_019874	Akr1b3	chr6:34253929-34267489	CR_Ileum	CR_Colon	OK	16.8452	61.4826	1.86784	-4.56272	5.04963e-06	0.000155919	yes
XLOC_010522	Acer1	chr17:57092912-57121549	CR_Ileum	CR_Colon	OK	8.98361	32.7248	1.86502	-3.36637	0.000761655	0.0119991	yes
XLOC_008793	Hes1	chr16:30065442-30067882	CR_Ileum	CR_Colon	OK	14.2156	51.6037	1.86	-4.61101	4.0071e-06	0.000126976	yes
XLOC_019979	Nod1	chr6:54873935-54922632	CR_Ileum	CR_Colon	OK	1.4002	5.0766	1.85823	-3.16114	0.00157155	0.021657	yes
XLOC_004831	Agr2	chr12:36719243-36730721	CR_Ileum	CR_Colon	OK	407.479	1476.56	1.85744	-3.54966	0.000385734	0.00677947	yes
XLOC_008704	Abcc1	chr16:14361652-14475057	CR_Ileum	CR_Colon	OK	1.77897	6.42781	1.85329	-3.6277	0.000285959	0.00526513	yes
XLOC_018287	Steap1	chr5:5736321-5749317	CR_Ileum	CR_Colon	OK	1.44455	5.20358	1.84888	-2.89819	0.00375326	0.0435111	yes
XLOC_021203	Pde2a	chr7:108570211-108661341	CR_Ileum	CR_Colon	OK	6.99651	24.7642	1.82355	-4.30263	1.68784e-05	0.000451496	yes
XLOC_016337	Cited4	chr4:120339167-120340425	CR_Ileum	CR_Colon	OK	2.04163	7.22496	1.82327	-2.98535	0.0028325	0.0348232	yes
XLOC_026125	Armcx3	chrX:131291106-131295995	CR_Ileum	CR_Colon	OK	1.95383	6.90983	1.82234	-3.46277	0.000534635	0.00894068	yes
XLOC_002359	C030046I01Rik	chr10:79372797-79379675	CR_Ileum	CR_Colon	OK	28.8448	101.322	1.81256	-4.78587	1.70248e-06	5.89882e-05	yes
XLOC_005206	Kcnf1	chr12:17178905-17183765	CR_Ileum	CR_Colon	OK	1.35298	4.7462	1.81063	-3.18821	0.00143158	0.0200807	yes
XLOC_006730	Ppif	chr14:26513655-26520768	CR_Ileum	CR_Colon	OK	23.4754	81.7568	1.80019	-3.98577	6.72617e-05	0.00151885	yes
XLOC_004075	Nek8	chr11:77979605-77990168	CR_Ileum	CR_Colon	OK	2.02396	7.0189	1.79407	-2.8511	0.00435681	0.0488903	yes
XLOC_016324	Ccdc23	chr4:118867914-118873903	CR_Ileum	CR_Colon	OK	7.96226	27.3697	1.78133	-3.13493	0.00171896	0.0233324	yes
XLOC_014177	Pdrg1	chr2:152834625-152841119	CR_Ileum	CR_Colon	OK	6.3992	21.8959	1.7747	-3.1608	0.00157335	0.0216778	yes
XLOC_001284	Ephx1	chr1:182919683-182947651	CR_Ileum	CR_Colon	OK	3.0417	10.3933	1.77271	-3.13881	0.00169634	0.0230634	yes
XLOC_005884	Fgfr4	chr13:55253877-55270120	CR_Ileum	CR_Colon	OK	2.66836	9.08207	1.76707	-3.685	0.000228706	0.00436373	yes
XLOC_005916	2010111I01Rik	chr13:63116293-63404281	CR_Ileum	CR_Colon	OK	13.9245	47.3132	1.76461	-3.49469	0.000474617	0.00808738	yes
XLOC_008388	Rapgef3	chr15:97575200-97598113	CR_Ileum	CR_Colon	OK	1.44542	4.91089	1.76449	-3.06828	0.00215297	0.0280099	yes
XLOC_007064	Pcca	chr14:122933549-123289166	CR_Ileum	CR_Colon	OK	6.27954	21.2585	1.75931	-3.72482	0.000195455	0.00381283	yes
XLOC_022931	Atp11a	chr8:12757015-12868728	CR_Ileum	CR_Colon	OK	1.55393	5.25886	1.75883	-3.40847	0.000653273	0.0105782	yes
XLOC_002946	Rnf130	chr11:49838476-49939218	CR_Ileum	CR_Colon	OK	10.8658	36.6959	1.75583	-3.69981	0.000215757	0.00415414	yes
XLOC_020976	2410002F23Rik	chr7:51501654-51507689	CR_Ileum	CR_Colon	OK	10.4505	35.2558	1.75429	-3.44939	0.000561856	0.00933267	yes
XLOC_017357	Ttll10	chr4:155399570-155434285	CR_Ileum	CR_Colon	OK	10.5456	35.4902	1.75077	-3.0869	0.00202253	0.0266075	yes
XLOC_005631	-	chr12:114010409-114017961	CR_Ileum	CR_Colon	OK	0.529047	1.77827	1.749	-2.95504	0.00312629	0.0376169	yes
XLOC_003964	BC096441,Tnfsf12,Tnfsf13	chr11:69496078-69509600	CR_Ileum	CR_Colon	OK	6.21574	20.5697	1.72652	-3.30071	0.00096439	0.0145353	yes
XLOC_008476	Csad	chr15:102007428-102032996	CR_Ileum	CR_Colon	OK	4.85538	16.047	1.72465	-3.52072	0.00043037	0.00743552	yes
XLOC_019229	Smo	chr6:29685496-29711366	CR_Ileum	CR_Colon	OK	1.85144	6.10009	1.72018	-3.63865	0.000274071	0.00507331	yes
XLOC_020044	Tgoln1	chr6:72558414-72566994	CR_Ileum	CR_Colon	OK	75.5744	246.995	1.70851	-3.0598	0.00221485	0.0286655	yes
XLOC_023168	Slc27a1	chr8:74092665-74111196	CR_Ileum	CR_Colon	OK	5.5536	18.135	1.70728	-3.43935	0.000583107	0.00962519	yes
XLOC_012085	Myof	chr19:37973525-38118112	CR_Ileum	CR_Colon	OK	1.68273	5.49285	1.70675	-3.59925	0.000319138	0.00578367	yes
XLOC_023260	Gpt2	chr8:88016515-88051495	CR_Ileum	CR_Colon	OK	2.46878	8.04619	1.7045	-3.35199	0.000802332	0.0125148	yes
XLOC_017837	Paics	chr5:77342273-77396531	CR_Ileum	CR_Colon	OK	8.43743	27.4578	1.70234	-3.82965	0.000128324	0.00265903	yes
XLOC_018280	Fzd1	chr5:4753838-4758216	CR_Ileum	CR_Colon	OK	2.09256	6.8066	1.70167	-3.74224	0.000182388	0.00359183	yes
XLOC_023527	Ankrd10	chr8:11611582-11635754	CR_Ileum	CR_Colon	OK	10.6431	34.542	1.69844	-3.15995	0.00157798	0.0217295	yes
XLOC_011276	Afap1l1	chr18:61889805-61946366	CR_Ileum	CR_Colon	OK	1.608	5.18925	1.69026	-3.05829	0.00222601	0.0287798	yes
XLOC_000615	Pycr2	chr1:182834399-182838219	CR_Ileum	CR_Colon	OK	4.53645	14.4003	1.66647	-3.29071	0.00099934	0.0149666	yes
XLOC_012032	Fam189a2	chr19:24047239-24105788	CR_Ileum	CR_Colon	OK	5.65501	17.8754	1.66038	-2.89511	0.00379031	0.0438558	yes
XLOC_023931	Chst4	chr8:112550727-112563696	CR_Ileum	CR_Colon	OK	9.14365	28.7534	1.65289	-3.48931	0.00048427	0.00822223	yes
XLOC_001894	Tcp11l2	chr10:84039691-84077100	CR_Ileum	CR_Colon	OK	1.42536	4.45811	1.64511	-2.89233	0.00382398	0.0441466	yes
XLOC_018530	Rassf6	chr5:91032101-91069746	CR_Ileum	CR_Colon	OK	9.93624	31.0691	1.64471	-3.35123	0.000804543	0.0125413	yes
XLOC_019819	Tmem168	chr6:13530688-13558063	CR_Ileum	CR_Colon	OK	4.01835	12.5548	1.64357	-3.54016	0.000399888	0.0069876	yes
XLOC_020151	Frmd4b	chr6:97236859-97567651	CR_Ileum	CR_Colon	OK	3.69438	11.5156	1.64018	-3.48366	0.000494607	0.0083715	yes
XLOC_021189	Lipt2	chr7:107307786-107309441	CR_Ileum	CR_Colon	OK	3.2804	10.2204	1.6395	-2.93482	0.00333736	0.0396074	yes
XLOC_015583	Gstm3	chr3:107766613-107772092	CR_Ileum	CR_Colon	OK	16.8304	52.3317	1.63661	-4.07045	4.69221e-05	0.00111011	yes
XLOC_008086	Ncald	chr15:37295929-37722183	CR_Ileum	CR_Colon	OK	1.9181	5.94828	1.6328	-2.96217	0.00305477	0.0369243	yes
XLOC_002786	Selm	chr11:3406112-3417370	CR_Ileum	CR_Colon	OK	48.3209	149.385	1.62832	-3.83705	0.000124523	0.00258968	yes
XLOC_012549	Gm13611	chr2:32127324-32127757	CR_Ileum	CR_Colon	OK	67.1667	207.538	1.62756	-4.03796	5.39191e-05	0.00125349	yes
XLOC_008763	Ephb3	chr16:21204833-21223500	CR_Ileum	CR_Colon	OK	3.19586	9.84894	1.62376	-3.18677	0.00143873	0.0201542	yes
XLOC_014967	Reg4	chr3:98026051-98040671	CR_Ileum	CR_Colon	OK	58.9947	180.862	1.61623	-3.79663	0.000146674	0.00298468	yes
XLOC_004816	Slc26a3	chr12:32115186-32158767	CR_Ileum	CR_Colon	OK	49.5719	151.816	1.61473	-3.49868	0.000467573	0.00798511	yes
XLOC_011708	O3far1	chr19:38171568-38188753	CR_Ileum	CR_Colon	OK	3.28626	10.064	1.61468	-2.91529	0.00355361	0.041642	yes
XLOC_019822	2610001J05Rik	chr6:13819073-13821483	CR_Ileum	CR_Colon	OK	6.09972	18.6046	1.60885	-3.20603	0.00134582	0.019057	yes
XLOC_006455	Ptcd2	chr13:100089603-100114633	CR_Ileum	CR_Colon	OK	10.8137	32.7139	1.59704	-3.33781	0.000844401	0.0130454	yes
XLOC_004296	Acly	chr11:100337665-100398290	CR_Ileum	CR_Colon	OK	24.9543	75.3687	1.59468	-3.73848	0.000185139	0.00363714	yes
XLOC_011757	Sema4g	chr19:45063196-45077886	CR_Ileum	CR_Colon	OK	81.7304	246.413	1.59213	-2.90266	0.00370009	0.0430294	yes
XLOC_023304	Gpr56	chr8:97490225-97538108	CR_Ileum	CR_Colon	OK	5.85537	17.6515	1.59196	-3.50634	0.000454313	0.00779161	yes
XLOC_000383	Slc41a1	chr1:133724588-133745440	CR_Ileum	CR_Colon	OK	1.40802	4.22069	1.58381	-3.24293	0.00118306	0.0171559	yes
XLOC_021042	Zdhhc13	chr7:56044372-56082807	CR_Ileum	CR_Colon	OK	11.9691	35.8471	1.58255	-4.06882	4.72509e-05	0.0011167	yes
XLOC_026137	Wbp5	chrX:132779618-132781678	CR_Ileum	CR_Colon	OK	24.3379	72.782	1.58037	-3.9332	8.38213e-05	0.00183514	yes
XLOC_001218	Tomm40l	chr1:173144100-173152989	CR_Ileum	CR_Colon	OK	4.76136	14.2134	1.57781	-2.87751	0.00400825	0.045838	yes
XLOC_011217	Fgf1	chr18:38998326-39130928	CR_Ileum	CR_Colon	OK	2.61687	7.76658	1.56944	-3.28395	0.00102364	0.0152637	yes
XLOC_002543	Srgap1	chr10:121218046-121484371	CR_Ileum	CR_Colon	OK	0.975305	2.89129	1.56779	-3.30861	0.000937595	0.0141979	yes
XLOC_013121	Pygb	chr2:150612531-150657484	CR_Ileum	CR_Colon	OK	11.6301	34.3556	1.56269	-4.11586	3.85741e-05	0.000934813	yes
XLOC_012120	Pyroxd2	chr19:42786596-42827276	CR_Ileum	CR_Colon	OK	3.07041	8.99515	1.55072	-2.94719	0.00320673	0.0383522	yes
XLOC_022558	Prss8	chr7:135056021-135073702	CR_Ileum	CR_Colon	OK	10.2035	29.8661	1.54944	-3.17343	0.00150649	0.0209136	yes
XLOC_014941	Hist2h2be	chr3:96025043-96027661	CR_Ileum	CR_Colon	OK	1.73747	5.07354	1.54601	-2.86079	0.00422581	0.0477702	yes
XLOC_022249	Tsku	chr7:105499010-105509838	CR_Ileum	CR_Colon	OK	4.66026	13.5943	1.54452	-2.85001	0.00437178	0.0490146	yes
XLOC_017339	Plch2	chr4:154356799-154446554	CR_Ileum	CR_Colon	OK	4.55421	13.2299	1.53854	-3.08542	0.00203266	0.0267122	yes
XLOC_008366	Slc2a13	chr15:91098121-91403692	CR_Ileum	CR_Colon	OK	1.39803	4.05455	1.53614	-3.26552	0.00109263	0.0161021	yes
XLOC_024950	Fut4	chr9:14552902-14556566	CR_Ileum	CR_Colon	OK	8.17616	23.6705	1.5336	-3.97916	6.91591e-05	0.0015538	yes
XLOC_011881	Ccdc85b	chr19:5447697-5457563	CR_Ileum	CR_Colon	OK	1.62915	4.70468	1.52998	-3.01231	0.00259265	0.0324628	yes
XLOC_013187	Acss2	chr2:155343778-155388526	CR_Ileum	CR_Colon	OK	16.181	46.6173	1.52657	-3.7051	0.000211309	0.00407698	yes
XLOC_020142	Lrig1	chr6:94450307-94650219	CR_Ileum	CR_Colon	OK	10.5936	30.4425	1.5229	-3.35634	0.000789811	0.0123446	yes
XLOC_024628	Vps13c	chr9:67688152-67844754	CR_Ileum	CR_Colon	OK	1.58815	4.54553	1.5171	-3.67058	0.000242003	0.00456918	yes
XLOC_009892	Cyp39a1	chr17:43804373-43888380	CR_Ileum	CR_Colon	OK	1.96344	5.61539	1.516	-3.00644	0.00264329	0.0329659	yes
XLOC_024324	Pigyl	chr9:21961289-21962798	CR_Ileum	CR_Colon	OK	9.42551	26.9522	1.51576	-2.92555	0.00343845	0.04056	yes
XLOC_003484	G6pc3	chr11:102050887-102055399	CR_Ileum	CR_Colon	OK	13.2272	37.6085	1.50755	-3.62778	0.000285865	0.00526398	yes
XLOC_021348	Parva	chr7:119571219-119735202	CR_Ileum	CR_Colon	OK	7.79855	21.9433	1.4925	-3.74706	0.000178921	0.00353468	yes
XLOC_025788	Mid1ip1	chrX:10292143-10296855	CR_Ileum	CR_Colon	OK	16.2068	45.2961	1.48278	-3.5648	0.000364135	0.00645742	yes
XLOC_018460	Atp8a1	chr5:68009376-68238689	CR_Ileum	CR_Colon	OK	3.33697	9.26726	1.4736	-3.28248	0.00102899	0.015326	yes
XLOC_008339	Celsr1	chr15:85729050-85864617	CR_Ileum	CR_Colon	OK	1.77935	4.92871	1.46986	-3.38825	0.000703408	0.0112433	yes
XLOC_010232	Spdef	chr17:27792549-27866125	CR_Ileum	CR_Colon	OK	16.3337	45.1764	1.46772	-3.16954	0.00152681	0.0211467	yes
XLOC_001090	Nek7	chr1:140380408-140516339	CR_Ileum	CR_Colon	OK	2.74822	7.58617	1.46487	-3.0125	0.00259109	0.0324513	yes
XLOC_021900	Sdhaf1	chr7:31106427-31107394	CR_Ileum	CR_Colon	OK	7.45109	20.5559	1.46403	-2.95266	0.00315051	0.0378408	yes
XLOC_007683	Pgcp	chr15:33012883-33524307	CR_Ileum	CR_Colon	OK	12.5526	34.4421	1.45619	-3.09567	0.00196371	0.0259736	yes
XLOC_012942	Ivd	chr2:118687723-118708642	CR_Ileum	CR_Colon	OK	9.79142	26.7652	1.45077	-3.22674	0.00125209	0.0179518	yes
XLOC_021089	Fam174b	chr7:80885192-80921805	CR_Ileum	CR_Colon	OK	8.62197	23.5626	1.45041	-3.34387	0.000826171	0.0128119	yes
XLOC_025184	Dlat	chr9:50442737-50467885	CR_Ileum	CR_Colon	OK	6.6873	18.2346	1.44719	-3.68895	0.000225181	0.00430535	yes
XLOC_015197	Pde7a	chr3:19121107-19211322	CR_Ileum	CR_Colon	OK	6.15954	16.7628	1.44437	-2.94028	0.00327921	0.039057	yes
XLOC_019736	Gprc5a	chr6:135015679-135034729	CR_Ileum	CR_Colon	OK	23.9318	65.0079	1.44169	-3.30759	0.000941028	0.0142382	yes
XLOC_011175	Reep5	chr18:34504539-34533069	CR_Ileum	CR_Colon	OK	7.36145	19.9041	1.435	-3.25243	0.00114425	0.0167065	yes
XLOC_018423	Prom1	chr5:44384857-44497788	CR_Ileum	CR_Colon	OK	23.0203	62.1361	1.43252	-2.98078	0.00287518	0.0352096	yes
XLOC_025375	Tbc1d2b	chr9:90096886-90165607	CR_Ileum	CR_Colon	OK	1.62312	4.37104	1.42921	-3.16937	0.00152768	0.0211575	yes
XLOC_019774	Stk38l	chr6:146673451-146727336	CR_Ileum	CR_Colon	OK	5.52381	14.7907	1.42095	-3.51503	0.000439698	0.00757783	yes
XLOC_011673	Uhrf2	chr19:30104951-30168214	CR_Ileum	CR_Colon	OK	8.57014	22.875	1.41638	-3.17674	0.00148942	0.0207254	yes
XLOC_001141	Tor3a	chr1:158583693-158604470	CR_Ileum	CR_Colon	OK	3.95129	10.4556	1.40388	-3.24267	0.00118415	0.0171695	yes
XLOC_011534	Pla2g16	chr19:7631926-7663035	CR_Ileum	CR_Colon	OK	4.57433	12.0596	1.39855	-2.93207	0.00336713	0.0398967	yes
XLOC_017075	Utp11l	chr4:124354625-124370840	CR_Ileum	CR_Colon	OK	14.4013	37.9198	1.39675	-2.89026	0.00384918	0.0443914	yes
XLOC_018022	Fbxo21	chr5:118426778-118460200	CR_Ileum	CR_Colon	OK	1.94199	5.07657	1.38632	-2.90472	0.00367577	0.0428183	yes
XLOC_010075	Tagap1	chr17:7159307-7165588	CR_Ileum	CR_Colon	OK	5.35532	13.9216	1.37828	-2.95767	0.00309969	0.0373596	yes
XLOC_002312	Mif	chr10:75322097-75322995	CR_Ileum	CR_Colon	OK	37.6085	97.0661	1.36791	-3.28508	0.00101953	0.0152146	yes
XLOC_021825	Rabac1	chr7:25754768-25757747	CR_Ileum	CR_Colon	OK	26.4451	67.7736	1.35772	-3.37389	0.000741137	0.01174	yes
XLOC_022513	Cln3	chr7:133714913-133732606	CR_Ileum	CR_Colon	OK	6.42932	16.4384	1.35434	-2.9001	0.00373046	0.0432919	yes
XLOC_016765	Tomm5	chr4:45118081-45120985	CR_Ileum	CR_Colon	OK	33.3859	84.8452	1.34559	-3.0857	0.00203076	0.026693	yes
XLOC_008975	Cbr1	chr16:93608081-93610594	CR_Ileum	CR_Colon	OK	98.4835	250.042	1.34422	-3.453	0.000554397	0.00922739	yes
XLOC_001716	Ppa1	chr10:61111368-61136913	CR_Ileum	CR_Colon	OK	54.8909	139.066	1.34113	-3.56697	0.000361138	0.00641553	yes
XLOC_012574	D730039F16Rik	chr2:34729900-34747653	CR_Ileum	CR_Colon	OK	13.8852	35.0449	1.33566	-3.34028	0.000836937	0.0129482	yes
XLOC_015000	Slc16a1	chr3:104442590-104479563	CR_Ileum	CR_Colon	OK	28.7643	72.4854	1.33341	-2.92769	0.00341489	0.0403292	yes
XLOC_001018	Steap3	chr1:122122992-122167659	CR_Ileum	CR_Colon	OK	5.37194	13.5251	1.33213	-3.07215	0.00212522	0.0277057	yes
XLOC_003664	Uqcr10	chr11:4601970-4604415	CR_Ileum	CR_Colon	OK	197.43	495.058	1.32625	-3.20088	0.00137008	0.0193524	yes
XLOC_018665	Mmab	chr5:114881042-114894036	CR_Ileum	CR_Colon	OK	3.89879	9.75206	1.32268	-3.03289	0.00242224	0.0308076	yes
XLOC_023114	Sh2d4a	chr8:70800290-70871621	CR_Ileum	CR_Colon	OK	11.232	28.0755	1.32169	-3.1837	0.00145408	0.020327	yes
XLOC_015169	Wls	chr3:159502658-159599780	CR_Ileum	CR_Colon	OK	14.0991	35.1489	1.31788	-3.12198	0.00179642	0.0242013	yes
XLOC_018755	Eif2b1	chr5:125020222-125029099	CR_Ileum	CR_Colon	OK	11.5415	28.7155	1.315	-3.19451	0.0014007	0.019701	yes
XLOC_002422	Ckap4	chr10:83989049-83996633	CR_Ileum	CR_Colon	OK	4.08365	10.1472	1.31316	-2.95787	0.00309771	0.0373502	yes
XLOC_006877	Mrpl52	chr14:55045745-55048587	CR_Ileum	CR_Colon	OK	64.574	160.209	1.31093	-3.12574	0.00177361	0.0239512	yes
XLOC_016071	Galnt12	chr4:47104791-47135914	CR_Ileum	CR_Colon	OK	16.9356	42.0022	1.31041	-3.05085	0.00228191	0.0293454	yes
XLOC_003545	Sox9	chr11:112643523-112649071	CR_Ileum	CR_Colon	OK	6.88783	17.0784	1.31005	-3.12171	0.00179804	0.0242149	yes
XLOC_018479	Ociad2	chr5:73713437-73730344	CR_Ileum	CR_Colon	OK	31.2647	76.9479	1.29935	-3.03168	0.00243195	0.030901	yes
XLOC_007696	Grhl2	chr15:37161673-37293323	CR_Ileum	CR_Colon	OK	4.15659	10.2092	1.29639	-2.99539	0.00274098	0.0339166	yes
XLOC_016725	Sigmar1	chr4:41685368-41688186	CR_Ileum	CR_Colon	OK	15.492	37.9356	1.29203	-3.28355	0.0010251	0.0152802	yes
XLOC_020716	Eml2	chr7:19766518-19791831	CR_Ileum	CR_Colon	OK	5.20706	12.6111	1.27616	-2.86984	0.00410683	0.0466853	yes
XLOC_011964	Tmem109	chr19:10945151-10956233	CR_Ileum	CR_Colon	OK	8.27419	19.9529	1.26991	-3.06177	0.00220032	0.0285091	yes
XLOC_002991	Slc36a1	chr11:55017841-55049832	CR_Ileum	CR_Colon	OK	9.89002	23.5341	1.25071	-3.0184	0.0025411	0.0319733	yes
XLOC_022633	Ifitm2	chr7:148140737-148141860	CR_Ileum	CR_Colon	OK	45.4857	107.216	1.23704	-3.10607	0.00189595	0.0252472	yes
XLOC_014930	Golph3l	chr3:95392855-95423169	CR_Ileum	CR_Colon	OK	38.8899	91.4481	1.23356	-3.02669	0.00247249	0.0313122	yes
XLOC_019306	Gstk1	chr6:42186959-42200441	CR_Ileum	CR_Colon	OK	22.7873	53.3583	1.22748	-2.89898	0.0037438	0.0434172	yes
XLOC_020041	Mat2a	chr6:72382785-72390734	CR_Ileum	CR_Colon	OK	38.2106	89.1431	1.22215	-2.91016	0.00361238	0.0421906	yes
XLOC_002255	Ddit4	chr10:59412422-59414518	CR_Ileum	CR_Colon	OK	11.1044	25.8789	1.22065	-2.95569	0.00311973	0.0375563	yes
XLOC_021832	Pafah1b3	chr7:26080064-26083056	CR_Ileum	CR_Colon	OK	31.4058	73.0539	1.21793	-2.8968	0.00376985	0.0436738	yes
XLOC_025206	Acat1	chr9:53388175-53418530	CR_Ileum	CR_Colon	OK	24.5991	57.1949	1.21728	-2.86678	0.00414667	0.0470551	yes
XLOC_022955	Agpat5	chr8:18846278-18884413	CR_Ileum	CR_Colon	OK	4.26843	9.92084	1.21676	-2.88021	0.00397415	0.0455323	yes
XLOC_015556	Cttnbp2nl	chr3:104804832-104856064	CR_Ileum	CR_Colon	OK	5.23861	12.0832	1.20575	-2.96055	0.00307087	0.0370947	yes
XLOC_019727	Bcl2l14	chr6:134346346-134388755	CR_Ileum	CR_Colon	OK	11.279	25.8296	1.19539	-2.95785	0.00309788	0.0373502	yes
XLOC_017795	Fam114a1	chr5:65361313-65433140	CR_Ileum	CR_Colon	OK	8.95854	20.5077	1.19483	-3.04164	0.00235295	0.0300847	yes
XLOC_023936	Fuk	chr8:113406362-113426359	CR_Ileum	CR_Colon	OK	5.90156	13.4899	1.19271	-2.86873	0.00412122	0.0468237	yes
XLOC_023800	Ier2	chr8:87185229-87186751	CR_Ileum	CR_Colon	OK	37.4164	84.7383	1.17934	-3.10397	0.00190943	0.0253902	yes
XLOC_006428	Scamp1	chr13:94971343-95055340	CR_Ileum	CR_Colon	OK	16.1307	36.5096	1.17846	-2.96248	0.0030517	0.0368974	yes
XLOC_025445	Mapkapk3	chr9:107157254-107192215	CR_Ileum	CR_Colon	OK	12.6914	28.6445	1.17441	-2.9317	0.00337114	0.0399294	yes
XLOC_016024	4933409K07Rik	chr4:42452732-42476567	CR_Ileum	CR_Colon	OK	20.7348	46.2485	1.15736	-3.03695	0.00238988	0.0304588	yes
XLOC_002335	D10Jhu81e	chr10:77624811-77632513	CR_Ileum	CR_Colon	OK	15.6922	34.9984	1.15724	-2.88541	0.00390901	0.0449228	yes
XLOC_013155	Tm9sf4	chr2:152987036-153036201	CR_Ileum	CR_Colon	OK	20.9707	45.6403	1.12193	-2.91445	0.00356313	0.0417382	yes
XLOC_005278	Nfkbia	chr12:56590395-56593634	CR_Ileum	CR_Colon	OK	53.3496	24.9851	-1.09441	2.88047	0.00397086	0.0454994	yes
XLOC_021482	Dock1	chr7:141862369-142365330	CR_Ileum	CR_Colon	OK	16.3934	7.6541	-1.09881	2.84514	0.00443914	0.0496111	yes
XLOC_008962	Ifnar1	chr16:91485459-91510767	CR_Ileum	CR_Colon	OK	10.4566	4.83589	-1.11257	2.91673	0.0035372	0.0414936	yes
XLOC_006332	A130040M12Rik	chr13:62184506-62397849	CR_Ileum	CR_Colon	OK	34.8072	16.0709	-1.11493	2.87637	0.00402273	0.0459586	yes
XLOC_023560	6820431F20Rik	chr8:19863863-19893010	CR_Ileum	CR_Colon	OK	37.2372	17.1389	-1.11947	2.91232	0.00358758	0.0419759	yes
XLOC_003686	Tmed4	chr11:6170716-6174855	CR_Ileum	CR_Colon	OK	66.9446	30.6703	-1.12613	2.95735	0.00310296	0.0373828	yes
XLOC_015627	Snx7	chr3:117483006-117572300	CR_Ileum	CR_Colon	OK	42.0479	19.2324	-1.1285	2.8498	0.00437463	0.0490407	yes
XLOC_009551	Chd1	chr17:15840781-15909576	CR_Ileum	CR_Colon	OK	11.0064	5.02034	-1.13248	2.89327	0.00381251	0.0440509	yes
XLOC_012471	Edf1	chr2:25413419-25417602	CR_Ileum	CR_Colon	OK	477.238	216.27	-1.14188	2.8482	0.00439679	0.0492469	yes
XLOC_018159	Tsc22d4	chr5:138187223-138200975	CR_Ileum	CR_Colon	OK	63.2048	28.5033	-1.1489	2.98995	0.00279022	0.034412	yes
XLOC_022947	Fbxo25	chr8:13907805-13940521	CR_Ileum	CR_Colon	OK	77.2827	34.7788	-1.15194	2.88013	0.00397516	0.0455392	yes
XLOC_017210	Pink1	chr4:137869324-137882211	CR_Ileum	CR_Colon	OK	56.8782	25.5222	-1.15612	3.0207	0.00252192	0.0317879	yes
XLOC_004212	Npepps	chr11:97067158-97141890	CR_Ileum	CR_Colon	OK	38.1097	16.9863	-1.16578	2.86522	0.00416715	0.0472562	yes
XLOC_011681	Pten	chr19:32832066-32900650	CR_Ileum	CR_Colon	OK	15.8405	7.05188	-1.16754	2.97157	0.0029628	0.0360731	yes
XLOC_026071	Atp7a	chrX:103222614-103323499	CR_Ileum	CR_Colon	OK	8.60134	3.81206	-1.17399	2.92854	0.00340562	0.0402455	yes
XLOC_016768	Mcart1	chr4:45408795-45421638	CR_Ileum	CR_Colon	OK	36.5706	16.1933	-1.17529	2.86352	0.00418969	0.0474415	yes
XLOC_007053	Dnajc3	chr14:119337153-119380924	CR_Ileum	CR_Colon	OK	30.1278	13.2763	-1.18224	2.98551	0.00283107	0.0348127	yes
XLOC_026586	Abcb7	chrX:101475903-101609199	CR_Ileum	CR_Colon	OK	11.7794	5.18964	-1.18256	2.93145	0.00337386	0.0399487	yes
XLOC_004044	Pafah1b1	chr11:74487450-74537886	CR_Ileum	CR_Colon	OK	40.6313	17.8579	-1.18603	2.95438	0.00313296	0.0376828	yes
XLOC_007685	Laptm4b	chr15:34167780-34214059	CR_Ileum	CR_Colon	OK	71.8382	31.5358	-1.18776	2.87748	0.00400867	0.0458404	yes
XLOC_013227	Top1	chr2:160471632-160548501	CR_Ileum	CR_Colon	OK	35.6917	15.6614	-1.18838	2.88969	0.00385618	0.0444537	yes
XLOC_011119	Rock1	chr18:10063741-10182210	CR_Ileum	CR_Colon	OK	14.8006	6.48849	-1.1897	2.93138	0.00337458	0.0399496	yes
XLOC_016328	Foxj3	chr4:119201397-119301724	CR_Ileum	CR_Colon	OK	15.9609	6.9857	-1.19207	2.88625	0.00389868	0.0448342	yes
XLOC_000664	Irf6	chr1:194979305-194998229	CR_Ileum	CR_Colon	OK	54.6484	23.918	-1.19208	2.92532	0.00344103	0.0405862	yes
XLOC_016226	Ttc22	chr4:106294802-106312894	CR_Ileum	CR_Colon	OK	50.2703	21.8944	-1.19914	2.90511	0.00367119	0.0427784	yes
XLOC_012458	Tprn	chr2:25118117-25125406	CR_Ileum	CR_Colon	OK	63.9621	27.8272	-1.20072	3.06334	0.00218884	0.0283922	yes
XLOC_023735	Pik3r2	chr8:73292078-73300611	CR_Ileum	CR_Colon	OK	36.469	15.8336	-1.20368	2.99065	0.00278384	0.0343372	yes
XLOC_001795	Ilvbl	chr10:78037244-78047247	CR_Ileum	CR_Colon	OK	65.7725	28.4436	-1.20938	3.04238	0.00234713	0.0300172	yes
XLOC_021146	Ctsc	chr7:95426602-95459385	CR_Ileum	CR_Colon	OK	41.2398	17.8098	-1.21136	3.1562	0.00159839	0.0219534	yes
XLOC_005659	Klf6	chr13:5860734-5869639	CR_Ileum	CR_Colon	OK	80.5074	34.7413	-1.21247	2.87757	0.00400746	0.0458337	yes
XLOC_012194	Pdzd8	chr19:59335367-59424128	CR_Ileum	CR_Colon	OK	11.1659	4.81677	-1.21296	2.95008	0.00317696	0.038074	yes
XLOC_023299	Cx3cl1	chr8:97296079-97306326	CR_Ileum	CR_Colon	OK	54.5971	23.5481	-1.21321	3.09377	0.0019763	0.0261044	yes
XLOC_004185	Pdk2	chr11:94887571-94902685	CR_Ileum	CR_Colon	OK	56.6341	24.4066	-1.2144	3.15077	0.00162839	0.0222923	yes
XLOC_001020	Insig2	chr1:123200929-123233949	CR_Ileum	CR_Colon	OK	27.4298	11.8194	-1.21459	3.04951	0.00229213	0.0294529	yes
XLOC_014650	Pld1	chr3:27837601-28034889	CR_Ileum	CR_Colon	OK	40.5216	17.4136	-1.21848	2.89157	0.00383323	0.0442373	yes
XLOC_012183	A630007B06Rik	chr19:56861814-56896856	CR_Ileum	CR_Colon	OK	13.7373	5.88045	-1.2241	3.17042	0.00152217	0.0210877	yes
XLOC_003908	Aldh3a2	chr11:61058256-61080952	CR_Ileum	CR_Colon	OK	68.8016	29.4419	-1.22457	2.97461	0.00293365	0.0357817	yes
XLOC_019339	Atp6v0e2	chr6:48487567-48491799	CR_Ileum	CR_Colon	OK	26.3725	11.278	-1.22552	3.05127	0.00227878	0.029312	yes
XLOC_025878	Stag2	chrX:39502378-39630425	CR_Ileum	CR_Colon	OK	22.6104	9.66629	-1.22596	3.03471	0.0024077	0.0306508	yes
XLOC_005667	Larp4b	chr13:9093143-9173693	CR_Ileum	CR_Colon	OK	31.1749	13.2204	-1.23762	3.02641	0.00247476	0.0313374	yes
XLOC_009296	Chmp2b	chr16:65539377-65564882	CR_Ileum	CR_Colon	OK	111.871	47.4296	-1.23798	3.06094	0.00220641	0.0285746	yes
XLOC_010186	Fahd1	chr17:24985840-24987247	CR_Ileum	CR_Colon	OK	85.3463	36.1065	-1.24107	3.21232	0.00131666	0.0187169	yes
XLOC_001135	Cep350	chr1:157692089-157820385	CR_Ileum	CR_Colon	OK	11.0245	4.65532	-1.24376	2.91219	0.00358903	0.0419841	yes
XLOC_006959	Ccdc25	chr14:66456138-66485441	CR_Ileum	CR_Colon	OK	34.3946	14.5035	-1.24578	3.08805	0.00201478	0.0265274	yes
XLOC_001830	Gpx4	chr10:79516254-79519184	CR_Ileum	CR_Colon	OK	247.287	103.992	-1.24971	3.11894	0.00181502	0.0244007	yes
XLOC_011292	Lman1	chr18:66140387-66162435	CR_Ileum	CR_Colon	OK	29.6286	12.4155	-1.25485	2.93434	0.00334253	0.0396462	yes
XLOC_014937	Mtmr11	chr3:95965892-95976343	CR_Ileum	CR_Colon	OK	46.8942	19.6258	-1.25666	3.02251	0.0025069	0.0316452	yes
XLOC_002340	Pdxk	chr10:77899491-77927693	CR_Ileum	CR_Colon	OK	19.6236	8.20466	-1.25807	3.23393	0.001221	0.0175947	yes
XLOC_000437	Dennd1b	chr1:140856752-141072872	CR_Ileum	CR_Colon	OK	7.7306	3.22631	-1.2607	2.92006	0.00349968	0.0411425	yes
XLOC_001271	Adss	chr1:179659944-179726640	CR_Ileum	CR_Colon	OK	49.5648	20.6788	-1.26116	2.84733	0.00440878	0.0493464	yes
XLOC_014957	Rnf115	chr3:96531533-96595078	CR_Ileum	CR_Colon	OK	32.6299	13.5903	-1.26362	3.27279	0.00106492	0.0157651	yes
XLOC_001833	Midn	chr10:79610729-79621234	CR_Ileum	CR_Colon	OK	54.7344	22.7792	-1.26473	2.99453	0.00274869	0.0339872	yes
XLOC_019474	Dctn1	chr6:83115917-83150112	CR_Ileum	CR_Colon	OK	48.4755	20.1562	-1.26603	2.94653	0.00321358	0.0384072	yes
XLOC_021596	Ppp6r1	chr7:4583096-4610745	CR_Ileum	CR_Colon	OK	61.0956	25.3682	-1.26805	3.00971	0.00261495	0.0326805	yes
XLOC_016872	Ptprd	chr4:75586959-76240203	CR_Ileum	CR_Colon	OK	15.0248	6.22991	-1.27007	2.84292	0.00447021	0.0498805	yes
XLOC_003047	Alkbh5	chr11:60351184-60372014	CR_Ileum	CR_Colon	OK	23.3429	9.66821	-1.27166	3.33239	0.000861042	0.0132574	yes
XLOC_010577	Fez2	chr17:78777218-78817443	CR_Ileum	CR_Colon	OK	29.1145	12.0435	-1.27348	2.97596	0.00292073	0.0356475	yes
XLOC_000770	Mfsd9	chr1:40828884-40847527	CR_Ileum	CR_Colon	OK	15.3952	6.36793	-1.27359	3.05942	0.00221765	0.0286935	yes
XLOC_001553	Lats1	chr10:7398768-7436259	CR_Ileum	CR_Colon	OK	12.5675	5.19603	-1.27422	3.01004	0.00261213	0.0326562	yes
XLOC_009737	Cyp4f40	chr17:32795816-32814006	CR_Ileum	CR_Colon	OK	62.1951	25.7067	-1.27465	3.15504	0.00160476	0.02203	yes
XLOC_014733	Rnf13	chr3:57539984-57639155	CR_Ileum	CR_Colon	OK	32.956	13.5958	-1.27738	2.87832	0.00399802	0.0457515	yes
XLOC_013116	Zfp937	chr2:150043834-150072883	CR_Ileum	CR_Colon	OK	3.81141	1.57091	-1.27873	2.90121	0.00371722	0.0431789	yes
XLOC_017788	Tbc1d1	chr5:64551449-64742876	CR_Ileum	CR_Colon	OK	13.8826	5.70033	-1.28416	2.87799	0.0040022	0.0457852	yes
XLOC_002965	Sar1b	chr11:51577164-51605455	CR_Ileum	CR_Colon	OK	97.7239	40.1022	-1.28503	3.35894	0.000782434	0.0122543	yes
XLOC_003931	Map2k4	chr11:65501735-65601823	CR_Ileum	CR_Colon	OK	24.8048	10.1697	-1.28634	3.24636	0.00116889	0.0169898	yes
XLOC_000396	Ppp1r15b	chr1:135027603-135036377	CR_Ileum	CR_Colon	OK	56.1637	23.0206	-1.28672	3.01399	0.00257835	0.032343	yes
XLOC_025271	Fem1b	chr9:62639635-62659455	CR_Ileum	CR_Colon	OK	7.78705	3.19137	-1.2869	3.23472	0.00121762	0.0175561	yes
XLOC_010453	Klc4	chr17:46767572-46783007	CR_Ileum	CR_Colon	OK	125.12	51.2494	-1.28771	3.01687	0.00255403	0.0320996	yes
XLOC_001210	Atf6	chr1:172631453-172798090	CR_Ileum	CR_Colon	OK	12.1714	4.98392	-1.28814	3.08302	0.00204911	0.0268986	yes
XLOC_002541	Tbk1	chr10:120983508-121023935	CR_Ileum	CR_Colon	OK	30.5442	12.5054	-1.28835	2.90768	0.00364126	0.0424786	yes
XLOC_014907	Lingo4,Rorc	chr3:94176747-94208423	CR_Ileum	CR_Colon	OK	26.3649	10.7818	-1.29002	2.89259	0.00382081	0.0441215	yes
XLOC_012129	Erlin1	chr19:44109432-44144275	CR_Ileum	CR_Colon	OK	39.2404	16.0467	-1.29006	3.25989	0.00111457	0.0163659	yes
XLOC_005259	Dnajb9	chr12:45306549-45311075	CR_Ileum	CR_Colon	OK	32.6534	13.3502	-1.29037	2.90149	0.00371394	0.0431452	yes
XLOC_005372	Numb	chr12:85134991-85262888	CR_Ileum	CR_Colon	OK	36.4027	14.8502	-1.29356	2.97345	0.00294473	0.0358813	yes
XLOC_014174	Bcl2l1	chr2:152606400-152657437	CR_Ileum	CR_Colon	OK	35.9284	14.6476	-1.29446	3.13199	0.00173626	0.0235413	yes
XLOC_009080	D16H22S680E	chr16:18300910-18348158	CR_Ileum	CR_Colon	OK	41.9717	17.0956	-1.29579	2.91851	0.00351714	0.041304	yes
XLOC_011460	Acy3	chr19:3986516-3990025	CR_Ileum	CR_Colon	OK	32.7626	13.2965	-1.301	2.9632	0.00304457	0.0368432	yes
XLOC_023269	Papd5	chr8:90723108-90783622	CR_Ileum	CR_Colon	OK	14.9756	6.06089	-1.30501	3.05216	0.00227203	0.029242	yes
XLOC_019472	Rtkn	chr6:83085716-83102573	CR_Ileum	CR_Colon	OK	46.0075	18.5877	-1.30752	3.00956	0.00261624	0.0326929	yes
XLOC_003299	Ap2b1	chr11:83116198-83218541	CR_Ileum	CR_Colon	OK	40.2066	16.2338	-1.30844	3.10783	0.00188467	0.0251269	yes
XLOC_019994	Vopp1	chr6:57702255-57775355	CR_Ileum	CR_Colon	OK	13.3225	5.3783	-1.30864	2.85381	0.00431983	0.0485906	yes
XLOC_009390	A630089N07Rik	chr16:98283676-98303604	CR_Ileum	CR_Colon	OK	17.8443	7.19926	-1.30954	3.23687	0.00120848	0.0174526	yes
XLOC_011738	Pi4k2a	chr19:42164914-42196767	CR_Ileum	CR_Colon	OK	19.9993	8.06678	-1.30989	3.2501	0.00115363	0.0168214	yes
XLOC_010045	Ttc7	chr17:87682225-87781169	CR_Ileum	CR_Colon	OK	34.7881	14.0312	-1.30996	3.09478	0.00196958	0.0260389	yes
XLOC_004904	Ppm1a	chr12:73862197-73895927	CR_Ileum	CR_Colon	OK	59.7289	24.0849	-1.3103	3.09469	0.00197016	0.0260449	yes
XLOC_002014	Ppm1h	chr10:122115817-122382849	CR_Ileum	CR_Colon	OK	12.4109	5.0008	-1.31137	2.85891	0.00425104	0.0479943	yes
XLOC_022470	Arl6ip1	chr7:125262403-125273139	CR_Ileum	CR_Colon	OK	143.61	57.8294	-1.31228	3.22638	0.00125368	0.0179689	yes
XLOC_015164	Ankrd13c	chr3:157608312-157671196	CR_Ileum	CR_Colon	OK	21.7187	8.73085	-1.31475	3.00832	0.002627	0.0328068	yes
XLOC_004186	Itga3	chr11:94905787-94942721	CR_Ileum	CR_Colon	OK	58.3137	23.3453	-1.3207	2.95226	0.00315456	0.0378791	yes
XLOC_001120	E330020D12Rik	chr1:155251315-155261363	CR_Ileum	CR_Colon	OK	7.17371	2.86785	-1.32275	2.88556	0.00390715	0.0449083	yes
XLOC_021709	Calm3	chr7:17500727-17509381	CR_Ileum	CR_Colon	OK	269.882	107.678	-1.3256	2.86147	0.0042168	0.0476902	yes
XLOC_015549	Magi3	chr3:103817187-104024329	CR_Ileum	CR_Colon	OK	16.232	6.4762	-1.32562	3.34508	0.000822589	0.0127662	yes
XLOC_006337	Fbp2	chr13:62938238-62959839	CR_Ileum	CR_Colon	OK	207.68	82.7089	-1.32825	3.15761	0.0015907	0.0218684	yes
XLOC_012952	Vps18	chr2:119114477-119124189	CR_Ileum	CR_Colon	OK	10.1332	4.02972	-1.33034	3.12711	0.00176537	0.0238617	yes
XLOC_003060	Fam83g	chr11:61486283-61534301	CR_Ileum	CR_Colon	OK	14.1742	5.62634	-1.333	2.98288	0.00285546	0.0350203	yes
XLOC_021528	Pkp3	chr7:148264127-148276409	CR_Ileum	CR_Colon	OK	69.2123	27.459	-1.33375	3.08924	0.00200673	0.0264402	yes
XLOC_007736	Sqle	chr15:59146623-59162748	CR_Ileum	CR_Colon	OK	101.023	40.0696	-1.3341	3.13205	0.00173592	0.0235389	yes
XLOC_007001	Sucla2	chr14:73952592-73995949	CR_Ileum	CR_Colon	OK	81.7584	32.3861	-1.33599	3.44503	0.000570991	0.00946245	yes
XLOC_003168	Txndc17	chr11:72021027-72023989	CR_Ileum	CR_Colon	OK	148.578	58.6548	-1.3409	3.32412	0.000886975	0.0135813	yes
XLOC_018910	Usp12	chr5:147546387-147606532	CR_Ileum	CR_Colon	OK	46.3594	18.2683	-1.34352	3.12349	0.00178719	0.0240994	yes
XLOC_009922	AI661453	chr17:47549682-47608198	CR_Ileum	CR_Colon	OK	15.6515	6.1638	-1.34441	3.27505	0.00105643	0.0156695	yes
XLOC_007330	Efha1	chr14:58535098-58618104	CR_Ileum	CR_Colon	OK	54.3594	21.3423	-1.34881	3.44767	0.000565453	0.00938117	yes
XLOC_010223	Bak1	chr17:27156756-27165571	CR_Ileum	CR_Colon	OK	101.742	39.9233	-1.34962	3.41535	0.00063699	0.0103531	yes
XLOC_004852	Arhgap5	chr12:53604883-53680776	CR_Ileum	CR_Colon	OK	24.7455	9.70754	-1.34999	2.88719	0.00388701	0.0447261	yes
XLOC_015633	Abcd3	chr3:121461827-121518133	CR_Ileum	CR_Colon	OK	110.421	43.3152	-1.35007	3.18997	0.00142286	0.0199698	yes
XLOC_024520	Exph5	chr9:53109602-53189267	CR_Ileum	CR_Colon	OK	14.0508	5.51158	-1.35011	3.28303	0.00102698	0.0153021	yes
XLOC_001319	Rps6kc1	chr1:192596726-192735677	CR_Ileum	CR_Colon	OK	9.04241	3.54694	-1.35013	3.12143	0.00179977	0.0242353	yes
XLOC_002507	Tmem19	chr10:114777795-114799471	CR_Ileum	CR_Colon	OK	31.3338	12.2701	-1.35257	3.23867	0.00120088	0.0173611	yes
XLOC_008192	Naprt1	chr15:75721357-75725004	CR_Ileum	CR_Colon	OK	110.254	43.0254	-1.35757	2.87184	0.00408089	0.0464773	yes
XLOC_018401	Mrfap1	chr5:37186105-37187993	CR_Ileum	CR_Colon	OK	273.387	106.682	-1.35763	2.88101	0.00396397	0.0454299	yes
XLOC_011647	Ptar1	chr19:23761830-23806151	CR_Ileum	CR_Colon	OK	4.70937	1.83597	-1.35899	3.24613	0.00116987	0.0170001	yes
XLOC_012727	Itgav	chr2:83564324-83647073	CR_Ileum	CR_Colon	OK	5.59646	2.17731	-1.36197	3.11016	0.00186987	0.0249635	yes
XLOC_024464	Hyou1	chr9:44187572-44200452	CR_Ileum	CR_Colon	OK	29.9554	11.6442	-1.36321	3.50702	0.000453159	0.00777663	yes
XLOC_016450	Il28ra	chr4:135242174-135264115	CR_Ileum	CR_Colon	OK	10.4119	4.04585	-1.36372	2.95169	0.00316038	0.0379203	yes
XLOC_006693	Ptprg	chr14:12385949-13074553	CR_Ileum	CR_Colon	OK	6.61254	2.5615	-1.36822	3.31894	0.000903583	0.0137846	yes
XLOC_003953	Kdm6b	chr11:69211873-69233846	CR_Ileum	CR_Colon	OK	19.392	7.51095	-1.36839	3.3726	0.000744622	0.0117819	yes
XLOC_004508	Rfng	chr11:120642058-120645520	CR_Ileum	CR_Colon	OK	37.3645	14.4704	-1.36856	3.27006	0.00107523	0.0158852	yes
XLOC_012717	Ssfa2	chr2:79475227-79513121	CR_Ileum	CR_Colon	OK	43.0345	16.6499	-1.36998	3.25673	0.00112702	0.0165126	yes
XLOC_009315	App	chr16:84954670-85174004	CR_Ileum	CR_Colon	OK	50.634	19.5144	-1.37557	2.8505	0.004365	0.0489599	yes
XLOC_006820	Socs4	chr14:47860618-47915773	CR_Ileum	CR_Colon	OK	14.2758	5.50042	-1.37596	2.94766	0.0032019	0.0383186	yes
XLOC_013546	Ralgps1	chr2:32988937-33227130	CR_Ileum	CR_Colon	OK	5.61086	2.15949	-1.37753	2.87351	0.00405945	0.04629	yes
XLOC_005365	Synj2bp	chr12:82590212-82633894	CR_Ileum	CR_Colon	OK	26.3915	10.1533	-1.37813	2.92704	0.003422	0.0404003	yes
XLOC_011729	Lcor	chr19:41557017-41670952	CR_Ileum	CR_Colon	OK	11.5392	4.43481	-1.3796	2.9439	0.00324107	0.0386795	yes
XLOC_003366	Ppp1r9b	chr11:94852377-94868212	CR_Ileum	CR_Colon	OK	25.7121	9.87342	-1.38083	3.17726	0.00148676	0.0206992	yes
XLOC_008041	Rai14	chr15:10498732-10644386	CR_Ileum	CR_Colon	OK	12.7368	4.88434	-1.38277	2.95075	0.00317002	0.0380052	yes
XLOC_019889	Zc3hav1	chr6:38255219-38305900	CR_Ileum	CR_Colon	OK	26.5036	10.1547	-1.38404	2.84477	0.00444441	0.04965	yes
XLOC_024008	Abcb10	chr8:126476162-126507022	CR_Ileum	CR_Colon	OK	21.9902	8.42094	-1.38481	3.25446	0.00113609	0.0166103	yes
XLOC_009770	Psmb8	chr17:34335139-34338399	CR_Ileum	CR_Colon	OK	50.9848	19.5188	-1.38521	3.04202	0.00234994	0.0300516	yes
XLOC_016063	Tdrd7	chr4:45977918-46047636	CR_Ileum	CR_Colon	OK	31.2147	11.9423	-1.38614	3.3796	0.000725907	0.0115374	yes
XLOC_011087	5430411K18Rik	chr18:78135161-78234055	CR_Ileum	CR_Colon	OK	5.78033	2.21082	-1.38657	3.15265	0.00161798	0.022184	yes
XLOC_015663	Sgms2	chr3:131021898-131155622	CR_Ileum	CR_Colon	OK	24.2778	9.26069	-1.39045	3.01069	0.00260656	0.0325972	yes
XLOC_017243	Spen	chr4:141000524-141094978	CR_Ileum	CR_Colon	OK	8.64687	3.2965	-1.39124	3.17283	0.00150961	0.0209517	yes
XLOC_004441	Wbp2	chr11:115939886-115948278	CR_Ileum	CR_Colon	OK	116.415	44.2632	-1.3951	3.39541	0.000685265	0.011	yes
XLOC_002260	Unc5b	chr10:60225332-60294329	CR_Ileum	CR_Colon	OK	33.6636	12.7941	-1.39571	3.12394	0.00178446	0.0240662	yes
XLOC_005417	Sel1l	chr12:93044474-93087597	CR_Ileum	CR_Colon	OK	27.7084	10.5203	-1.39715	3.44038	0.000580895	0.00959509	yes
XLOC_018402	Man2b2	chr5:37198051-37221888	CR_Ileum	CR_Colon	OK	26.036	9.87445	-1.39874	3.31666	0.000910992	0.0138804	yes
XLOC_025298	Rab8b	chr9:66691470-66767512	CR_Ileum	CR_Colon	OK	3.91018	1.48209	-1.3996	2.95711	0.0031054	0.037406	yes
XLOC_023123	Gmip	chr8:72332241-72346167	CR_Ileum	CR_Colon	OK	12.8033	4.84865	-1.40086	3.21461	0.00130624	0.0185974	yes
XLOC_026594	Magt1	chrX:103163423-103207238	CR_Ileum	CR_Colon	OK	30.4418	11.5198	-1.40194	3.49122	0.000480813	0.00817227	yes
XLOC_020214	Adipor2	chr6:119303116-119367531	CR_Ileum	CR_Colon	OK	94.7129	35.7595	-1.40523	2.9313	0.00337547	0.0399551	yes
XLOC_014039	Secisbp2l	chr2:125562721-125608606	CR_Ileum	CR_Colon	OK	23.3828	8.82113	-1.40641	3.10158	0.00192489	0.0255347	yes
XLOC_010165	Pdpk1	chr17:24210646-24278561	CR_Ileum	CR_Colon	OK	14.0909	5.31197	-1.40745	3.39817	0.000678385	0.0109069	yes
XLOC_012071	Lipa	chr19:34566805-34601964	CR_Ileum	CR_Colon	OK	21.3881	8.04154	-1.41127	3.37713	0.000732477	0.0116227	yes
XLOC_011465	Pitpnm1	chr19:4100026-4113965	CR_Ileum	CR_Colon	OK	20.0953	7.55481	-1.41139	3.15333	0.00161417	0.0221427	yes
XLOC_018291	Rundc3b	chr5:8490333-8623060	CR_Ileum	CR_Colon	OK	12.8574	4.83155	-1.41204	3.14411	0.00166594	0.0227217	yes
XLOC_010879	Apc	chr18:34367428-34482001	CR_Ileum	CR_Colon	OK	9.20537	3.45302	-1.41462	3.09741	0.00195222	0.0258432	yes
XLOC_015335	Rapgef2	chr3:78866324-79091181	CR_Ileum	CR_Colon	OK	4.17094	1.5582	-1.42049	2.97455	0.00293415	0.0357858	yes
XLOC_024749	Ryk	chr9:102737229-102810637	CR_Ileum	CR_Colon	OK	31.0393	11.5858	-1.42174	2.97532	0.00292679	0.0357117	yes
XLOC_007180	Gcap14	chr14:37688121-37781950	CR_Ileum	CR_Colon	OK	11.3909	4.24998	-1.42235	2.92	0.0035003	0.0411433	yes
XLOC_000891	Dnpep	chr1:75305137-75314212	CR_Ileum	CR_Colon	OK	113.049	42.1312	-1.42399	3.39974	0.000674502	0.0108549	yes
XLOC_023374	Nfat5	chr8:109816314-109903657	CR_Ileum	CR_Colon	OK	9.74019	3.6289	-1.42442	3.13543	0.00171602	0.0232953	yes
XLOC_020833	Sertad1	chr7:28271971-28275335	CR_Ileum	CR_Colon	OK	51.0317	19.006	-1.42494	3.59473	0.000324727	0.00586972	yes
XLOC_002007	Gns	chr10:120802145-120834309	CR_Ileum	CR_Colon	OK	34.3604	12.7917	-1.42554	3.42405	0.000616945	0.0100819	yes
XLOC_016379	AU040320	chr4:126430798-126645167	CR_Ileum	CR_Colon	OK	56.4752	21.0124	-1.42638	3.08707	0.00202139	0.0265972	yes
XLOC_018659	Coro1c	chr5:114292447-114358715	CR_Ileum	CR_Colon	OK	98.7194	36.7215	-1.42671	3.37007	0.000751488	0.0118718	yes
XLOC_010506	Ticam1	chr17:56408884-56416190	CR_Ileum	CR_Colon	OK	36.2605	13.4879	-1.42673	3.44173	0.000578013	0.00955318	yes
XLOC_006486	Kif2a	chr13:107737208-107812513	CR_Ileum	CR_Colon	OK	16.4311	6.11045	-1.42708	3.02499	0.00248642	0.0314517	yes
XLOC_016802	D730040F13Rik	chr4:56886021-56960549	CR_Ileum	CR_Colon	OK	5.67703	2.10993	-1.42794	3.04416	0.00233334	0.0298754	yes
XLOC_015681	Dapp1	chr3:137593969-137644513	CR_Ileum	CR_Colon	OK	8.09588	3.00854	-1.42813	2.98937	0.00279553	0.0344584	yes
XLOC_005331	Sgpp1	chr12:76815234-76836716	CR_Ileum	CR_Colon	OK	18.4813	6.86525	-1.42869	3.60766	0.000308966	0.00562456	yes
XLOC_012123	Got1	chr19:43574242-43599095	CR_Ileum	CR_Colon	OK	57.7432	21.4266	-1.43025	3.55477	0.000378304	0.0066677	yes
XLOC_005961	Ell2	chr13:75844931-75909806	CR_Ileum	CR_Colon	OK	21.3441	7.91438	-1.43129	3.56749	0.000360419	0.00640431	yes
XLOC_015178	Pag1	chr3:9687476-9833679	CR_Ileum	CR_Colon	OK	5.61225	2.07972	-1.43219	3.23686	0.00120854	0.0174526	yes
XLOC_017302	Kif1b	chr4:148550318-148681861	CR_Ileum	CR_Colon	OK	16.0226	5.93731	-1.43223	3.31801	0.000906622	0.0138231	yes
XLOC_025291	Trip4	chr9:65676732-65756601	CR_Ileum	CR_Colon	OK	6.69442	2.48028	-1.43246	2.89352	0.0038095	0.0440282	yes
XLOC_001703	Dnajb12	chr10:59342234-59363321	CR_Ileum	CR_Colon	OK	35.1935	13.0215	-1.43442	3.02947	0.00244985	0.0310752	yes
XLOC_002473	Socs2	chr10:94846058-94879491	CR_Ileum	CR_Colon	OK	34.6244	12.8074	-1.43481	3.05016	0.00228717	0.0294011	yes
XLOC_018360	Cgref1	chr5:31235515-31247853	CR_Ileum	CR_Colon	OK	174.476	64.538	-1.43481	3.41076	0.00064782	0.0105053	yes
XLOC_004885	Arf6	chr12:70473136-70476967	CR_Ileum	CR_Colon	OK	134.519	49.7218	-1.43586	3.24328	0.00118163	0.0171385	yes
XLOC_016805	Epb4.1l4b	chr4:57074597-57156028	CR_Ileum	CR_Colon	OK	155.976	57.6325	-1.43637	3.12026	0.00180691	0.0243166	yes
XLOC_011911	Rps6ka4	chr19:6903569-6915122	CR_Ileum	CR_Colon	OK	26.9123	9.93936	-1.43704	3.45995	0.000540285	0.00902157	yes
XLOC_025334	Lrrc1	chr9:77278629-77392659	CR_Ileum	CR_Colon	OK	35.3276	13.0449	-1.43731	3.65771	0.000254478	0.00476741	yes
XLOC_005216	Id2	chr12:25778663-25794030	CR_Ileum	CR_Colon	OK	29.9841	11.054	-1.43963	3.03251	0.0024253	0.0308342	yes
XLOC_003237	Git1	chr11:77306836-77321422	CR_Ileum	CR_Colon	OK	47.3858	17.4667	-1.43984	3.11793	0.00182125	0.0244652	yes
XLOC_013292	Pard6b	chr2:167905709-167926703	CR_Ileum	CR_Colon	OK	22.2682	8.18066	-1.44469	3.15354	0.00161305	0.0221301	yes
XLOC_016114	Ugcg	chr4:59201956-59253567	CR_Ileum	CR_Colon	OK	61.8298	22.7078	-1.44512	3.42976	0.000604123	0.00990764	yes
XLOC_003240	Myo18a	chr11:77576794-77679482	CR_Ileum	CR_Colon	OK	55.2844	20.3019	-1.44525	3.06681	0.00216353	0.028116	yes
XLOC_024639	Myo1e	chr9:70053742-70247874	CR_Ileum	CR_Colon	OK	34.3401	12.6085	-1.44549	3.60989	0.000306326	0.00558428	yes
XLOC_016650	Plekhf2	chr4:10915808-10935035	CR_Ileum	CR_Colon	OK	41.0247	15.0354	-1.44813	3.67716	0.000235849	0.00447277	yes
XLOC_000427	Kif21b	chr1:138027955-138077026	CR_Ileum	CR_Colon	OK	11.9551	4.38039	-1.4485	3.48201	0.000497673	0.00841635	yes
XLOC_013863	Ptprj	chr2:90194835-90420804	CR_Ileum	CR_Colon	OK	18.4545	6.75967	-1.44895	2.98072	0.00287576	0.0352148	yes
XLOC_015391	Slc25a44	chr3:88214417-88229061	CR_Ileum	CR_Colon	OK	23.7329	8.68794	-1.4498	3.42512	0.000614517	0.0100503	yes
XLOC_009229	Pvrl3	chr16:46387833-46497080	CR_Ileum	CR_Colon	OK	56.7361	20.7641	-1.45018	3.14891	0.00163878	0.0224126	yes
XLOC_006686	Abhd6	chr14:8835407-8890793	CR_Ileum	CR_Colon	OK	44.5314	16.2863	-1.45116	3.39114	0.000696016	0.011146	yes
XLOC_014708	Ccrn4l	chr3:51028368-51055657	CR_Ileum	CR_Colon	OK	40.8336	14.9061	-1.45385	3.18791	0.00143307	0.020092	yes
XLOC_000001	Lypla1	chr1:4797973-4836816	CR_Ileum	CR_Colon	OK	92.879	33.8468	-1.45634	3.6292	0.000284306	0.00523832	yes
XLOC_013234	Sgk2	chr2:162813205-162839873	CR_Ileum	CR_Colon	OK	29.0958	10.5854	-1.45874	3.07263	0.0021218	0.0276692	yes
XLOC_024747	Amotl2	chr9:102619619-102635747	CR_Ileum	CR_Colon	OK	4.19525	1.5248	-1.46013	2.93513	0.00333404	0.0395806	yes
XLOC_005306	L2hgdh	chr12:70791422-70825861	CR_Ileum	CR_Colon	OK	18.986	6.89878	-1.46052	3.36466	0.000766374	0.0120598	yes
XLOC_005421	Ptpn21	chr12:99914949-99975809	CR_Ileum	CR_Colon	OK	6.05092	2.19228	-1.46472	3.2562	0.00112914	0.0165348	yes
XLOC_001926	Lta4h	chr10:92916101-92979488	CR_Ileum	CR_Colon	OK	120.146	43.5209	-1.465	3.57454	0.000350843	0.00625818	yes
XLOC_010935	Ndfip1	chr18:38578526-38624841	CR_Ileum	CR_Colon	OK	154.365	55.8097	-1.46776	3.19072	0.0014192	0.0199222	yes
XLOC_004062	Abr	chr11:76220668-76437114	CR_Ileum	CR_Colon	OK	76.248	27.5579	-1.46823	2.99997	0.00270006	0.0335178	yes
XLOC_011172	Epb4.1l4a	chr18:33955980-34167156	CR_Ileum	CR_Colon	OK	6.22019	2.24625	-1.46944	3.08871	0.00201029	0.0264809	yes
XLOC_013182	Itch	chr2:154959216-155052590	CR_Ileum	CR_Colon	OK	31.8442	11.4924	-1.47036	3.6461	0.000266246	0.00495115	yes
XLOC_026603	Brwd3	chrX:105931098-106029721	CR_Ileum	CR_Colon	OK	3.58507	1.29153	-1.47293	2.98729	0.00281467	0.0346502	yes
XLOC_022444	Tmem41b	chr7:117115700-117131975	CR_Ileum	CR_Colon	OK	25.6321	9.21162	-1.47642	3.29053	0.001	0.0149735	yes
XLOC_025524	Plcd1	chr9:118980643-119002614	CR_Ileum	CR_Colon	OK	46.5275	16.6647	-1.48129	3.23218	0.0012285	0.0176846	yes
XLOC_021406	Sbk1	chr7:133416132-133438513	CR_Ileum	CR_Colon	OK	9.58012	3.42688	-1.48315	3.21658	0.00129728	0.0184936	yes
XLOC_002481	Csl	chr10:99220338-99222292	CR_Ileum	CR_Colon	OK	20.6747	7.3948	-1.48329	3.50691	0.000453335	0.00777905	yes
XLOC_010872	Map3k2	chr18:32322663-32396405	CR_Ileum	CR_Colon	OK	9.72487	3.47685	-1.4839	3.59832	0.000320276	0.00580095	yes
XLOC_018362	Slc5a6	chr5:31322193-31356996	CR_Ileum	CR_Colon	OK	30.3517	10.8477	-1.48439	2.9057	0.00366429	0.0427138	yes
XLOC_003429	Wipf2	chr11:98724911-98767800	CR_Ileum	CR_Colon	OK	16.3816	5.85182	-1.48512	3.6772	0.000235813	0.00447277	yes
XLOC_011794	Mxi1	chr19:53384995-53450300	CR_Ileum	CR_Colon	OK	23.9511	8.5537	-1.48547	3.53526	0.000407377	0.00709789	yes
XLOC_020162	Crbn	chr6:106719131-106750068	CR_Ileum	CR_Colon	OK	16.4624	5.87441	-1.48665	3.16172	0.0015684	0.0216271	yes
XLOC_008144	Asap1	chr15:63918418-64214481	CR_Ileum	CR_Colon	OK	9.98608	3.55774	-1.48896	3.32775	0.000875505	0.0134363	yes
XLOC_024813	Prkar2a	chr9:108594111-108652845	CR_Ileum	CR_Colon	OK	46.6699	16.5839	-1.49271	3.53808	0.000403043	0.00703452	yes
XLOC_010101	Dact2	chr17:14332236-14341536	CR_Ileum	CR_Colon	OK	21.3649	7.58894	-1.49327	3.5657	0.000362879	0.00644081	yes
XLOC_000278	Agap1	chr1:91351385-91802269	CR_Ileum	CR_Colon	OK	10.6832	3.79358	-1.49371	3.52016	0.000431287	0.00744732	yes
XLOC_014116	Flrt3	chr2:140221165-142215786	CR_Ileum	CR_Colon	OK	11.1242	3.94777	-1.4946	3.28092	0.0010347	0.0153975	yes
XLOC_003534	Axin2	chr11:108779249-108812099	CR_Ileum	CR_Colon	OK	27.0452	9.59343	-1.49525	3.63434	0.00027869	0.00515022	yes
XLOC_015692	Pkn2	chr3:142453865-142544983	CR_Ileum	CR_Colon	OK	25.4206	9.00955	-1.49647	3.78372	0.000154501	0.00311991	yes
XLOC_000667	Plxna2	chr1:196446022-196643062	CR_Ileum	CR_Colon	OK	8.32054	2.94108	-1.50033	3.67945	0.000233741	0.00444149	yes
XLOC_010014	Crim1	chr17:78599555-78775932	CR_Ileum	CR_Colon	OK	13.3179	4.70502	-1.50109	3.72564	0.000194819	0.0038031	yes
XLOC_013470	Nacc2	chr2:25911055-25978331	CR_Ileum	CR_Colon	OK	10.1055	3.56826	-1.50185	3.70649	0.000210148	0.00405846	yes
XLOC_002883	Stk10	chr11:32433265-32524595	CR_Ileum	CR_Colon	OK	16.4656	5.81158	-1.50246	3.05927	0.00221875	0.0287027	yes
XLOC_025163	Sidt2	chr9:45745929-45763363	CR_Ileum	CR_Colon	OK	54.2554	19.138	-1.50333	3.56959	0.00035754	0.0063613	yes
XLOC_013623	Ly75	chr2:60130151-60221356	CR_Ileum	CR_Colon	OK	12.5106	4.39243	-1.51006	3.22434	0.00126263	0.0180726	yes
XLOC_014032	Slc30a4	chr2:122506974-122528469	CR_Ileum	CR_Colon	OK	34.6928	12.1714	-1.51114	3.74514	0.000180293	0.00355894	yes
XLOC_020148	Tmf1	chr6:97101943-97129134	CR_Ileum	CR_Colon	OK	11.1976	3.92577	-1.51215	3.18655	0.00143983	0.0201653	yes
XLOC_017757	Cpeb2	chr5:43542924-43680963	CR_Ileum	CR_Colon	OK	8.42104	2.95072	-1.51293	3.52708	0.000420177	0.00728435	yes
XLOC_016960	Zyg11b	chr4:107900359-107973704	CR_Ileum	CR_Colon	OK	8.24434	2.88705	-1.51381	3.21059	0.00132464	0.0188112	yes
XLOC_019763	Etnk1	chr6:143115749-143157068	CR_Ileum	CR_Colon	OK	35.1614	12.3099	-1.51417	3.4121	0.000644643	0.0104583	yes
XLOC_017686	Mapre3	chr5:31117056-31168479	CR_Ileum	CR_Colon	OK	18.291	6.38543	-1.51828	3.11376	0.00184722	0.0247333	yes
XLOC_012951	Spint1	chr2:119063095-119075249	CR_Ileum	CR_Colon	OK	253.244	88.3638	-1.519	3.25086	0.00115055	0.0167875	yes
XLOC_003711	Actr2	chr11:19962306-20012954	CR_Ileum	CR_Colon	OK	79.0171	27.5461	-1.52032	3.7453	0.000180175	0.00355692	yes
XLOC_005928	Ptdss1	chr13:67013033-67099337	CR_Ileum	CR_Colon	OK	67.6827	23.5922	-1.52048	3.33579	0.00085058	0.0131254	yes
XLOC_009112	Ehhadh	chr16:21761357-21787939	CR_Ileum	CR_Colon	OK	38.2426	13.3245	-1.5211	3.75906	0.000170553	0.00339381	yes
XLOC_009003	Adcy9	chr16:4284810-4420542	CR_Ileum	CR_Colon	OK	6.21236	2.1632	-1.52197	3.05795	0.00222853	0.0288023	yes
XLOC_008250	Rac2	chr15:78389598-78403213	CR_Ileum	CR_Colon	OK	6.5686	2.28633	-1.52255	2.84673	0.0044171	0.0494269	yes
XLOC_015588	Gnai3	chr3:107910216-107949061	CR_Ileum	CR_Colon	OK	100.23	34.8742	-1.52309	3.50111	0.000463317	0.00792279	yes
XLOC_008162	Eif2c2	chr15:72926250-73015773	CR_Ileum	CR_Colon	OK	9.82373	3.41325	-1.52513	3.28665	0.00101386	0.0151452	yes
XLOC_003921	BC046404	chr11:62418385-62462025	CR_Ileum	CR_Colon	OK	53.228	18.4121	-1.53153	3.60749	0.000309178	0.00562797	yes
XLOC_023415	4933407C03Rik	chr8:119780918-119985405	CR_Ileum	CR_Colon	OK	56.0595	19.3752	-1.53275	3.70615	0.000210434	0.00406328	yes
XLOC_025324	Mapk6	chr9:75234584-75257821	CR_Ileum	CR_Colon	OK	54.1994	18.7155	-1.53404	3.83544	0.000125341	0.00260499	yes
XLOC_017154	Wdtc1	chr4:132848302-132909378	CR_Ileum	CR_Colon	OK	37.764	13.0389	-1.53419	3.67491	0.000237937	0.0045062	yes
XLOC_002232	Aim1	chr10:43670112-43758104	CR_Ileum	CR_Colon	OK	30.3901	10.4894	-1.53467	3.13611	0.00171206	0.0232532	yes
XLOC_004233	Ormdl3	chr11:98442584-98451391	CR_Ileum	CR_Colon	OK	35.6579	12.2749	-1.53851	3.29933	0.000969149	0.0145991	yes
XLOC_013065	Bmp2	chr2:133377916-133388626	CR_Ileum	CR_Colon	OK	20.3785	7.00841	-1.53989	3.38861	0.000702466	0.0112318	yes
XLOC_021030	Nomo1	chr7:53289065-53339582	CR_Ileum	CR_Colon	OK	57.5483	19.7883	-1.54012	3.3223	0.000892788	0.0136497	yes
XLOC_012408	Fam23a	chr2:14096150-14143620	CR_Ileum	CR_Colon	OK	82.837	28.4755	-1.54055	3.66395	0.000248355	0.00467164	yes
XLOC_017917	Cds1	chr5:102194148-102252871	CR_Ileum	CR_Colon	OK	110.712	38.0492	-1.54087	3.53591	0.000406367	0.00708363	yes
XLOC_021125	Eftud1	chr7:89797123-89926362	CR_Ileum	CR_Colon	OK	15.4065	5.29147	-1.5418	3.23178	0.00123021	0.0177025	yes
XLOC_006721	Samd8	chr14:22569752-22617948	CR_Ileum	CR_Colon	OK	8.32052	2.85213	-1.54464	3.69859	0.000216799	0.00416991	yes
XLOC_001058	Sox13	chr1:135278784-135321065	CR_Ileum	CR_Colon	OK	47.1575	16.1542	-1.54558	3.32957	0.000869787	0.0133679	yes
XLOC_019550	Nr2c2	chr6:92040329-92134060	CR_Ileum	CR_Colon	OK	11.4285	3.91355	-1.54608	3.1272	0.00176481	0.0238571	yes
XLOC_011456	Chka	chr19:3851772-3894368	CR_Ileum	CR_Colon	OK	43.3434	14.8265	-1.54763	2.85845	0.00425716	0.0480414	yes
XLOC_004154	Scpep1	chr11:88785333-88816756	CR_Ileum	CR_Colon	OK	40.9354	13.9877	-1.54919	4.01092	6.04822e-05	0.00138591	yes
XLOC_010021	Galm	chr17:80526810-80606725	CR_Ileum	CR_Colon	OK	70.2405	23.9513	-1.5522	3.20015	0.00137356	0.0193918	yes
XLOC_001574	Nhsl1	chr10:18038430-18254773	CR_Ileum	CR_Colon	OK	31.3448	10.6873	-1.55233	3.58073	0.000342635	0.00613739	yes
XLOC_026304	Cask	chrX:13094207-13423906	CR_Ileum	CR_Colon	OK	22.8409	7.77861	-1.55403	3.08044	0.00206694	0.0270938	yes
XLOC_005447	Ifi27l2b	chr12:104672398-104695499	CR_Ileum	CR_Colon	OK	301.574	102.512	-1.55672	3.00797	0.00262997	0.0328348	yes
XLOC_025131	Oaf	chr9:43029360-43047899	CR_Ileum	CR_Colon	OK	14.3365	4.8732	-1.55675	3.4019	0.000669189	0.0107833	yes
XLOC_019256	Tmem140	chr6:34813145-34828296	CR_Ileum	CR_Colon	OK	11.9531	4.04433	-1.56341	2.87521	0.00403754	0.046097	yes
XLOC_004085	Tnfaip1	chr11:78336351-78364237	CR_Ileum	CR_Colon	OK	64.0044	21.588	-1.56794	3.09858	0.00194453	0.0257521	yes
XLOC_014901	S100a10	chr3:93359038-93368567	CR_Ileum	CR_Colon	OK	959.281	323.145	-1.56977	3.54591	0.000391259	0.00686287	yes
XLOC_018667	Gltp	chr5:115119409-115141035	CR_Ileum	CR_Colon	OK	125.952	42.4238	-1.56993	3.8283	0.000129031	0.00267193	yes
XLOC_022535	Tbc1d10b	chr7:134340973-134357835	CR_Ileum	CR_Colon	OK	34.5512	11.6204	-1.57207	3.62419	0.000289873	0.005325	yes
XLOC_016687	Pnrc1	chr4:33332397-33335762	CR_Ileum	CR_Colon	OK	72.1947	24.2647	-1.57304	3.54096	0.000398672	0.00696863	yes
XLOC_002502	Atxn7l3b	chr10:112362483-112366082	CR_Ileum	CR_Colon	OK	54.6891	18.3688	-1.57399	4.03053	5.56513e-05	0.00128837	yes
XLOC_011898	Cdc42ep2,Dpf2	chr19:5897134-5924816	CR_Ileum	CR_Colon	OK	66.4681	22.2939	-1.57601	3.4103	0.000648912	0.0105199	yes
XLOC_002444	Nr1h4	chr10:88916978-88996367	CR_Ileum	CR_Colon	OK	80.5724	26.9909	-1.57781	3.50903	0.000449736	0.00772624	yes
XLOC_010849	Rnf125	chr18:21103087-21145855	CR_Ileum	CR_Colon	OK	5.53436	1.85379	-1.57794	3.29869	0.000971375	0.0146227	yes
XLOC_004141	Gdpd1	chr11:86847295-86887639	CR_Ileum	CR_Colon	OK	109.483	36.6543	-1.57865	3.48788	0.000486866	0.00825936	yes
XLOC_010578	Strn	chr17:79046138-79135965	CR_Ileum	CR_Colon	OK	10.1297	3.39106	-1.57879	3.30829	0.000938676	0.0142085	yes
XLOC_017251	Efhd2	chr4:141414056-141430854	CR_Ileum	CR_Colon	OK	168.856	56.4904	-1.57972	3.63113	0.000282181	0.00520478	yes
XLOC_016313	Elovl1	chr4:118100697-118109948	CR_Ileum	CR_Colon	OK	122.786	41.0664	-1.58011	3.28315	0.00102654	0.0152967	yes
XLOC_013588	Nr6a1	chr2:38578893-38782070	CR_Ileum	CR_Colon	OK	4.96852	1.65988	-1.58174	3.37304	0.000743442	0.0117689	yes
XLOC_016424	Ahdc1	chr4:132567412-132634025	CR_Ileum	CR_Colon	OK	6.0966	2.03198	-1.58512	3.17137	0.00151724	0.0210298	yes
XLOC_018612	Dgkq	chr5:109058828-109089823	CR_Ileum	CR_Colon	OK	35.9497	11.98	-1.58535	3.32678	0.000878551	0.0134747	yes
XLOC_021151	Picalm	chr7:97278741-97357442	CR_Ileum	CR_Colon	OK	97.259	32.3687	-1.58723	3.80076	0.000144251	0.00294199	yes
XLOC_009177	Parp14	chr16:35832003-35871712	CR_Ileum	CR_Colon	OK	20.5622	6.83082	-1.58987	3.54736	0.000389105	0.00683368	yes
XLOC_022200	Fam108c	chr7:91257865-91300403	CR_Ileum	CR_Colon	OK	114.505	38.0335	-1.59007	3.99057	6.59148e-05	0.00149223	yes
XLOC_019590	Irak2	chr6:113588460-113645032	CR_Ileum	CR_Colon	OK	31.4706	10.4505	-1.59043	3.82571	0.000130396	0.00269744	yes
XLOC_001730	Pbld1,Pbld2	chr10:62487259-62540842	CR_Ileum	CR_Colon	OK	52.2901	17.3595	-1.59081	3.35487	0.000794028	0.0124009	yes
XLOC_016769	Shb	chr4:45436146-45543700	CR_Ileum	CR_Colon	OK	26.2311	8.707	-1.59103	3.07722	0.00208941	0.0273294	yes
XLOC_014755	Tiparp	chr3:65331406-65359440	CR_Ileum	CR_Colon	OK	8.27109	2.74451	-1.59153	3.68514	0.000228574	0.00436161	yes
XLOC_022176	Furin	chr7:87534079-87550317	CR_Ileum	CR_Colon	OK	31.4556	10.4329	-1.59218	3.87696	0.000105768	0.00224805	yes
XLOC_019425	Gng12	chr6:66846390-66971415	CR_Ileum	CR_Colon	OK	9.81654	3.25155	-1.59409	3.00881	0.00262275	0.0327649	yes
XLOC_008851	Lrrc58	chr16:37868485-37888943	CR_Ileum	CR_Colon	OK	9.67962	3.20332	-1.59538	3.76471	0.000166745	0.00332907	yes
XLOC_005844	C78339	chr13:46764808-46774092	CR_Ileum	CR_Colon	OK	41.1297	13.5983	-1.59676	3.93386	8.35933e-05	0.00183123	yes
XLOC_018125	Mlxipl	chr5:135565756-135616093	CR_Ileum	CR_Colon	OK	46.0707	15.2277	-1.59716	3.57022	0.000356678	0.00634697	yes
XLOC_023025	Zfp703	chr8:28087807-28091934	CR_Ileum	CR_Colon	OK	33.8952	11.2025	-1.59726	4.00638	6.16566e-05	0.00140947	yes
XLOC_023648	Zfp353	chr8:43164626-43169733	CR_Ileum	CR_Colon	OK	14.7426	4.86655	-1.59903	4.09823	4.1632e-05	0.00100095	yes
XLOC_018000	Oasl1	chr5:115373248-115387922	CR_Ileum	CR_Colon	OK	38.675	12.7528	-1.60059	3.16257	0.00156382	0.0215786	yes
XLOC_011650	Dock8	chr19:25073622-25277100	CR_Ileum	CR_Colon	OK	5.52805	1.81825	-1.60422	3.616	0.000299192	0.00546859	yes
XLOC_009848	Trim31	chr17:37018540-37048513	CR_Ileum	CR_Colon	OK	75.591	24.8499	-1.60497	3.15969	0.00157936	0.0217432	yes
XLOC_003431	Rara	chr11:98789149-98836256	CR_Ileum	CR_Colon	OK	21.2247	6.97561	-1.60535	3.56756	0.000360316	0.00640349	yes
XLOC_001567	Fuca2	chr10:13220830-13238840	CR_Ileum	CR_Colon	OK	46.8315	15.3879	-1.60568	3.81696	0.000135109	0.00278145	yes
XLOC_011983	Stx3	chr19:11844849-11894002	CR_Ileum	CR_Colon	OK	40.252	13.2151	-1.60687	3.13415	0.00172354	0.0233917	yes
XLOC_017679	Ept1	chr5:30559146-30598976	CR_Ileum	CR_Colon	OK	23.5582	7.72536	-1.60856	4.0703	4.69523e-05	0.00111071	yes
XLOC_025267	Glce	chr9:61905053-61970545	CR_Ileum	CR_Colon	OK	13.9111	4.55788	-1.60981	3.13004	0.0017478	0.0236715	yes
XLOC_025802	Usp9x	chrX:12648607-12770985	CR_Ileum	CR_Colon	OK	24.3538	7.97536	-1.61053	3.76459	0.000166821	0.00332998	yes
XLOC_010975	Hsd17b4	chr18:50287854-50355924	CR_Ileum	CR_Colon	OK	78.7263	25.7388	-1.6129	3.40044	0.000672765	0.0108346	yes
XLOC_022354	Trim30d	chr7:111618461-111656363	CR_Ileum	CR_Colon	OK	31.7497	10.371	-1.61419	3.39165	0.000694732	0.0111303	yes
XLOC_002254	Ccdc109a	chr10:58909732-59079447	CR_Ileum	CR_Colon	OK	103.471	33.7689	-1.61546	3.53002	0.000415523	0.00721775	yes
XLOC_000659	Slc30a1	chr1:193717950-193737126	CR_Ileum	CR_Colon	OK	16.6849	5.43641	-1.61781	4.06223	4.86054e-05	0.00114494	yes
XLOC_014750	Arhgef26	chr3:62141135-62266143	CR_Ileum	CR_Colon	OK	8.71987	2.83497	-1.62097	3.76714	0.000165129	0.00330304	yes
XLOC_026391	Rap2c	chrX:48357090-48373265	CR_Ileum	CR_Colon	OK	28.3333	9.20646	-1.62178	3.72763	0.000193291	0.0037769	yes
XLOC_021461	Plekha1	chr7:138001785-138057012	CR_Ileum	CR_Colon	OK	38.6705	12.5449	-1.62413	3.7623	0.000168361	0.0033556	yes
XLOC_007035	Lmo7	chr14:102129144-102333910	CR_Ileum	CR_Colon	OK	86.4506	28.0093	-1.62597	3.48638	0.000489608	0.00829764	yes
XLOC_003675	Urgcp	chr11:5613419-5684713	CR_Ileum	CR_Colon	OK	18.9844	6.14261	-1.62789	3.43167	0.000599885	0.00985672	yes
XLOC_004125	Dhrs11	chr11:84634229-84642583	CR_Ileum	CR_Colon	OK	244.721	79.1732	-1.62806	3.5504	0.000384647	0.00676326	yes
XLOC_023665	Snx25	chr8:47118606-47238911	CR_Ileum	CR_Colon	OK	25.7065	8.27982	-1.63446	3.73981	0.000184159	0.00362173	yes
XLOC_005473	Ccdc85c	chr12:109441724-109513691	CR_Ileum	CR_Colon	OK	37.7716	12.1592	-1.63526	3.37716	0.000732391	0.0116221	yes
XLOC_011196	Hbegf	chr18:36664580-36675459	CR_Ileum	CR_Colon	OK	15.2546	4.9091	-1.63571	3.33097	0.000865426	0.0133092	yes
XLOC_012741	Ube2l6	chr2:84638984-84650160	CR_Ileum	CR_Colon	OK	31.3692	10.0809	-1.63772	3.6738	0.000238974	0.00452276	yes
XLOC_006201	Tubb2a	chr13:34166146-34169877	CR_Ileum	CR_Colon	OK	19.6488	6.30028	-1.64095	3.68852	0.000225561	0.00431189	yes
XLOC_018084	Atp6v0a2	chr5:125079584-125204823	CR_Ileum	CR_Colon	OK	83.1533	26.656	-1.64131	3.48725	0.000488009	0.00827622	yes
XLOC_016221	Ppap2b	chr4:104829951-104905372	CR_Ileum	CR_Colon	OK	4.95374	1.58762	-1.64165	3.30581	0.000947031	0.0143144	yes
XLOC_009178	Dtx3l	chr16:35926596-35973122	CR_Ileum	CR_Colon	OK	25.5579	8.1852	-1.64268	3.09129	0.00199291	0.0262862	yes
XLOC_000398	Golt1a,Kiss1	chr1:135206025-135226299	CR_Ileum	CR_Colon	OK	70.5186	22.5596	-1.64426	3.31552	0.000914731	0.0139295	yes
XLOC_024920	Sacm1l	chr9:123438891-123501716	CR_Ileum	CR_Colon	OK	46.2124	14.7641	-1.64619	3.9751	7.03494e-05	0.00157623	yes
XLOC_024864	Osbpl10	chr9:114887496-115142610	CR_Ileum	CR_Colon	OK	22.8364	7.29519	-1.64631	2.99324	0.00276034	0.0340965	yes
XLOC_026377	Zdhhc9	chrX:45523181-45562072	CR_Ileum	CR_Colon	OK	45.2346	14.4307	-1.64829	4.13922	3.48483e-05	0.000858096	yes
XLOC_022092	Svip	chr7:59117696-59261388	CR_Ileum	CR_Colon	OK	15.3613	4.89391	-1.65024	3.65498	0.000257204	0.00481079	yes
XLOC_013019	Mertk	chr2:128524463-128630179	CR_Ileum	CR_Colon	OK	46.565	14.8194	-1.65176	3.27279	0.00106493	0.0157651	yes
XLOC_016435	Aim1l	chr4:133616295-133648419	CR_Ileum	CR_Colon	OK	23.4968	7.47666	-1.652	4.02721	5.64414e-05	0.00130313	yes
XLOC_001205	Hsd17b7	chr1:171879667-171899336	CR_Ileum	CR_Colon	OK	17.3675	5.52137	-1.65329	4.01839	5.85967e-05	0.00134771	yes
XLOC_013604	Nmi	chr2:51804018-51828753	CR_Ileum	CR_Colon	OK	55.7335	17.7143	-1.65363	3.31866	0.000904517	0.0137948	yes
XLOC_023607	Bag4	chr8:26875010-26895681	CR_Ileum	CR_Colon	OK	11.0548	3.50353	-1.6578	4.0754	4.59363e-05	0.00109004	yes
XLOC_001618	Arhgap18	chr10:26492317-26638454	CR_Ileum	CR_Colon	OK	28.8799	9.15178	-1.65794	4.06041	4.89876e-05	0.00115284	yes
XLOC_018735	Rhof	chr5:123568188-123582638	CR_Ileum	CR_Colon	OK	26.8868	8.5091	-1.65982	4.05043	5.11241e-05	0.00119593	yes
XLOC_016861	Megf9	chr4:70089826-70195989	CR_Ileum	CR_Colon	OK	3.98211	1.25896	-1.66131	3.64268	0.00026981	0.00500801	yes
XLOC_011896	Frmd8	chr19:5850973-5875416	CR_Ileum	CR_Colon	OK	46.9795	14.8379	-1.66274	3.62529	0.000288639	0.00530495	yes
XLOC_019680	Tnfrsf1a	chr6:125299740-125312501	CR_Ileum	CR_Colon	OK	74.4378	23.4778	-1.66474	4.31545	1.59281e-05	0.000429281	yes
XLOC_006821	Mapk1ip1l	chr14:47916218-47942896	CR_Ileum	CR_Colon	OK	58.9749	18.599	-1.66488	3.9231	8.74157e-05	0.00190407	yes
XLOC_000235	Agfg1	chr1:82835993-82905118	CR_Ileum	CR_Colon	OK	22.2684	7.01573	-1.66633	3.46063	0.000538918	0.00900146	yes
XLOC_011793	Add3	chr19:53214934-53321889	CR_Ileum	CR_Colon	OK	42.718	13.4576	-1.66642	3.90122	9.57089e-05	0.00205967	yes
XLOC_011149	Fam59a	chr18:21283247-21458646	CR_Ileum	CR_Colon	OK	10.0266	3.14892	-1.67091	3.89257	9.91866e-05	0.00212524	yes
XLOC_023523	Irs2	chr8:10984678-11009259	CR_Ileum	CR_Colon	OK	11.7458	3.68882	-1.67092	4.01132	6.03813e-05	0.00138374	yes
XLOC_012099	Aldh18a1	chr19:40624746-40662953	CR_Ileum	CR_Colon	OK	30.3461	9.52945	-1.67105	4.1623	3.15056e-05	0.000785399	yes
XLOC_025401	Gm1123	chr9:98886791-98936504	CR_Ileum	CR_Colon	OK	239.805	75.2591	-1.67192	3.43365	0.000595524	0.00979883	yes
XLOC_012024	Aldh1a7	chr19:20767442-20802046	CR_Ileum	CR_Colon	OK	23	7.21674	-1.67222	4.01147	6.03417e-05	0.00138297	yes
XLOC_009938	Unc5cl	chr17:48587510-48609950	CR_Ileum	CR_Colon	OK	13.3713	4.18942	-1.67432	3.35757	0.000786297	0.0123044	yes
XLOC_009492	Tiam2	chr17:3326572-3557863	CR_Ileum	CR_Colon	OK	8.20925	2.56815	-1.67652	3.34137	0.000833656	0.0129028	yes
XLOC_014749	Rap2b	chr3:61168428-61172625	CR_Ileum	CR_Colon	OK	4.31848	1.35097	-1.67652	3.47695	0.000507144	0.00854592	yes
XLOC_003361	Lrrc59	chr11:94491137-94538807	CR_Ileum	CR_Colon	OK	134.988	42.1673	-1.67863	3.36884	0.000754855	0.0119163	yes
XLOC_019748	Dera	chr6:137703053-137850866	CR_Ileum	CR_Colon	OK	59.0418	18.4406	-1.67885	3.77713	0.000158644	0.00318969	yes
XLOC_007399	Slc39a14	chr14:70703075-70751268	CR_Ileum	CR_Colon	OK	28.5617	8.91659	-1.67952	3.61933	0.000295363	0.00541063	yes
XLOC_026058	Chic1	chrX:100551814-100591457	CR_Ileum	CR_Colon	OK	4.83354	1.50682	-1.68158	3.80786	0.000140177	0.00287115	yes
XLOC_019920	Epha1	chr6:42308485-42323291	CR_Ileum	CR_Colon	OK	41.216	12.8459	-1.6819	3.86011	0.000113338	0.00238521	yes
XLOC_018562	Antxr2	chr5:98311843-98460235	CR_Ileum	CR_Colon	OK	18.0063	5.60477	-1.68377	4.06488	4.80564e-05	0.00113321	yes
XLOC_007382	Dock5	chr14:68369984-68551629	CR_Ileum	CR_Colon	OK	17.6237	5.47991	-1.68529	4.21688	2.47706e-05	0.000636033	yes
XLOC_012982	B2m	chr2:121945843-122011925	CR_Ileum	CR_Colon	OK	1565.47	486.434	-1.68628	2.88084	0.00396621	0.0454508	yes
XLOC_019894	Jhdm1d	chr6:39086585-39156772	CR_Ileum	CR_Colon	OK	12.0204	3.73275	-1.68718	3.95412	7.68166e-05	0.00170224	yes
XLOC_024524	Slc35f2	chr9:53619341-53665968	CR_Ileum	CR_Colon	OK	26.9945	8.36737	-1.68982	3.69695	0.000218208	0.00419297	yes
XLOC_016612	Cdk11b	chr4:154975524-155024048	CR_Ileum	CR_Colon	OK	83.3289	25.7554	-1.69394	3.08544	0.00203251	0.0267118	yes
XLOC_013229	Lpin3	chr2:160706405-160731736	CR_Ileum	CR_Colon	OK	37.2707	11.4833	-1.69851	3.82457	0.000131002	0.00270737	yes
XLOC_025124	Sc5d	chr9:42058894-42072383	CR_Ileum	CR_Colon	OK	74.7458	22.966	-1.70249	3.84876	0.000118716	0.00248451	yes
XLOC_006249	Wnk2	chr13:49131495-49243507	CR_Ileum	CR_Colon	OK	4.51063	1.38474	-1.70372	3.17982	0.00147367	0.0205491	yes
XLOC_000080	Npas2	chr1:39250578-39420085	CR_Ileum	CR_Colon	OK	11.7162	3.59634	-1.70391	3.8704	0.000108655	0.00229995	yes
XLOC_009212	Gramd1c	chr16:43980462-44028058	CR_Ileum	CR_Colon	OK	7.32979	2.24257	-1.70862	3.46522	0.000529804	0.00886657	yes
XLOC_021098	Abhd2	chr7:86418113-86510397	CR_Ileum	CR_Colon	OK	94.1169	28.7702	-1.70988	2.98233	0.00286061	0.0350659	yes
XLOC_003100	Mfsd6l	chr11:68369687-68371747	CR_Ileum	CR_Colon	OK	12.5607	3.83559	-1.7114	3.79155	0.00014971	0.00303755	yes
XLOC_025134	Pdzd3	chr9:44048759-44059564	CR_Ileum	CR_Colon	OK	41.9841	12.7828	-1.71563	3.6265	0.000287286	0.00528533	yes
XLOC_004513	Cd7	chr11:120898062-120900792	CR_Ileum	CR_Colon	OK	12.0551	3.66872	-1.71629	2.9954	0.00274088	0.0339166	yes
XLOC_010446	Tjap1	chr17:46394790-46419965	CR_Ileum	CR_Colon	OK	28.9755	8.7955	-1.72	3.69008	0.000224182	0.00428847	yes
XLOC_001632	Frk	chr10:34203205-34331344	CR_Ileum	CR_Colon	OK	34.7442	10.5452	-1.72019	4.06397	4.82455e-05	0.00113706	yes
XLOC_023832	Snx20	chr8:91150046-91160051	CR_Ileum	CR_Colon	OK	19.2163	5.83231	-1.72019	3.44603	0.000568889	0.00943114	yes
XLOC_016701	Ddx58	chr4:40150809-40186858	CR_Ileum	CR_Colon	OK	13.5715	4.10816	-1.72402	4.12813	3.65726e-05	0.00089254	yes
XLOC_022540	Sephs2	chr7:134415394-134417573	CR_Ileum	CR_Colon	OK	89.5908	27.0479	-1.72783	4.27983	1.87033e-05	0.000494594	yes
XLOC_009982	Ppp4r1	chr17:66132673-66191266	CR_Ileum	CR_Colon	OK	46.6152	14.0717	-1.72801	4.1366	3.52489e-05	0.000865854	yes
XLOC_017906	Bmp2k	chr5:97426590-97540615	CR_Ileum	CR_Colon	OK	10.097	3.04783	-1.72808	3.15848	0.00158595	0.0218217	yes
XLOC_019885	Creb3l2	chr6:37277264-37392229	CR_Ileum	CR_Colon	OK	4.44107	1.33774	-1.73111	3.66369	0.000248608	0.00467421	yes
XLOC_019788	2810474O19Rik	chr6:149257935-149284185	CR_Ileum	CR_Colon	OK	16.5169	4.9664	-1.73367	4.13053	3.61931e-05	0.000884932	yes
XLOC_001947	Atp2b1	chr10:98377039-98488777	CR_Ileum	CR_Colon	OK	74.7339	22.4155	-1.73727	3.45963	0.00054092	0.00903015	yes
XLOC_008821	Osbpl11	chr16:33185156-33243462	CR_Ileum	CR_Colon	OK	13.4456	4.02542	-1.73992	3.66225	0.000250012	0.00469684	yes
XLOC_022542	Zfp747	chr7:134507241-134519855	CR_Ileum	CR_Colon	OK	14.2931	4.27761	-1.74044	3.91001	9.22918e-05	0.00199541	yes
XLOC_021183	Arrb1	chr7:106683995-106755281	CR_Ileum	CR_Colon	OK	29.4154	8.79416	-1.74195	4.28415	1.83437e-05	0.000486184	yes
XLOC_016358	Mtf1	chr4:124479792-124527974	CR_Ileum	CR_Colon	OK	8.34237	2.49164	-1.74336	3.97649	6.99397e-05	0.00156895	yes
XLOC_000207	Cyp27a1	chr1:74759730-74784616	CR_Ileum	CR_Colon	OK	30.1604	9.00174	-1.74438	3.53077	0.000414352	0.00719966	yes
XLOC_016412	Laptm5	chr4:130469248-130492063	CR_Ileum	CR_Colon	OK	3.22565	0.96127	-1.74657	2.86028	0.00423271	0.0478214	yes
XLOC_005271	1110002B05Rik	chr12:55746360-55757559	CR_Ileum	CR_Colon	OK	128.956	38.4249	-1.74677	4.14331	3.42323e-05	0.000844763	yes
XLOC_018223	Lmtk2	chr5:144861239-144949073	CR_Ileum	CR_Colon	OK	22.6795	6.73993	-1.75059	4.42267	9.74891e-06	0.00027849	yes
XLOC_003840	Slc22a5	chr11:53678040-53705237	CR_Ileum	CR_Colon	OK	48.0031	14.2523	-1.75193	4.13587	3.53619e-05	0.000868049	yes
XLOC_014276	Slc35c2	chr2:165102038-165113350	CR_Ileum	CR_Colon	OK	47.0021	13.9144	-1.75615	3.73934	0.000184505	0.00362596	yes
XLOC_022596	Clrn3	chr7:142700177-142720519	CR_Ileum	CR_Colon	OK	87.0337	25.7567	-1.75662	4.05855	4.93786e-05	0.00116069	yes
XLOC_012662	Nostrin	chr2:68973856-69027386	CR_Ileum	CR_Colon	OK	60.9293	18.0255	-1.7571	4.56088	5.09398e-06	0.000157092	yes
XLOC_001015	Tmem37	chr1:121903556-121970609	CR_Ileum	CR_Colon	OK	46.8058	13.8412	-1.75772	3.78986	0.000150733	0.00305453	yes
XLOC_006417	Rasgrf2	chr13:92020011-92901449	CR_Ileum	CR_Colon	OK	1.9965	0.589781	-1.75922	3.4843	0.000493422	0.00835653	yes
XLOC_021535	Eps8l2	chr7:148524900-148551009	CR_Ileum	CR_Colon	OK	221.563	65.4323	-1.75964	3.52062	0.000430536	0.00743723	yes
XLOC_019546	Slc6a6	chr6:91634060-91709061	CR_Ileum	CR_Colon	OK	47.1722	13.9197	-1.76081	3.5705	0.000356302	0.0063413	yes
XLOC_013005	Slc27a2	chr2:126378562-126413983	CR_Ileum	CR_Colon	OK	13.7712	4.06254	-1.7612	3.45052	0.000559517	0.00930076	yes
XLOC_010615	Mcfd2	chr17:87653782-87665287	CR_Ileum	CR_Colon	OK	89.1961	26.2743	-1.76333	3.95678	7.59657e-05	0.00168659	yes
XLOC_017894	Ccng2	chr5:93693472-93705257	CR_Ileum	CR_Colon	OK	87.7407	25.8237	-1.76455	3.55998	0.000370885	0.0065588	yes
XLOC_017726	Sh3bp2	chr5:34868432-34906288	CR_Ileum	CR_Colon	OK	8.49736	2.50007	-1.76505	3.41004	0.000649526	0.0105291	yes
XLOC_010266	Sik1	chr17:31981194-31992737	CR_Ileum	CR_Colon	OK	2.43957	0.716468	-1.76765	3.20996	0.00132755	0.0188453	yes
XLOC_000417	Arl8a	chr1:137043392-137052847	CR_Ileum	CR_Colon	OK	46.5036	13.6421	-1.76928	4.31701	1.58161e-05	0.000426622	yes
XLOC_021929	Lsr	chr7:31742788-31774744	CR_Ileum	CR_Colon	OK	179.386	52.5363	-1.77168	3.87743	0.000105565	0.00224416	yes
XLOC_009007	Coro7	chr16:4626883-4679720	CR_Ileum	CR_Colon	OK	27.0752	7.89485	-1.77799	4.3978	1.09355e-05	0.000307715	yes
XLOC_006264	Nfil3	chr13:53062577-53076408	CR_Ileum	CR_Colon	OK	7.1878	2.09542	-1.77831	3.36872	0.000755171	0.0119198	yes
XLOC_002262	Sgpl1	chr10:60544900-60610413	CR_Ileum	CR_Colon	OK	66.6343	19.4172	-1.77893	4.00217	6.27633e-05	0.00143109	yes
XLOC_010256	Tff3	chr17:31262250-31266556	CR_Ileum	CR_Colon	OK	4047.22	1177.71	-1.78094	2.95863	0.00309005	0.0372859	yes
XLOC_000982	Ppip5k2	chr1:99602622-99689808	CR_Ileum	CR_Colon	OK	27.8922	8.11229	-1.78168	3.99124	6.57286e-05	0.00148831	yes
XLOC_018292	Crot	chr5:8966047-8997332	CR_Ileum	CR_Colon	OK	46.4087	13.4846	-1.78308	4.10017	4.12846e-05	0.000993524	yes
XLOC_014628	Car13	chr3:14641726-14663822	CR_Ileum	CR_Colon	OK	29.0263	8.42915	-1.7839	4.32618	1.51718e-05	0.000411242	yes
XLOC_016121	Slc31a1	chr4:62021734-62052803	CR_Ileum	CR_Colon	OK	102.512	29.7603	-1.78434	4.15746	3.21806e-05	0.000800484	yes
XLOC_011639	Aldh1a1	chr19:20676471-20717952	CR_Ileum	CR_Colon	OK	152.09	44.138	-1.78483	4.18867	2.80598e-05	0.000708934	yes
XLOC_026215	Acot9	chrX:151697000-151732186	CR_Ileum	CR_Colon	OK	26.0358	7.55531	-1.78494	3.61941	0.000295271	0.00540984	yes
XLOC_003331	Mtmr4	chr11:87405630-87429803	CR_Ileum	CR_Colon	OK	35.4931	10.2989	-1.78505	3.98327	6.79743e-05	0.00153214	yes
XLOC_017893	2014-09-11	chr5:93522482-93603984	CR_Ileum	CR_Colon	OK	10.9	3.16045	-1.78612	4.42731	9.54152e-06	0.000273233	yes
XLOC_024579	Uaca	chr9:60642289-60734306	CR_Ileum	CR_Colon	OK	37.3913	10.8348	-1.78703	3.99626	6.43508e-05	0.00146144	yes
XLOC_023216	Tbc1d9	chr8:85689250-85796839	CR_Ileum	CR_Colon	OK	2.57473	0.744778	-1.78954	2.87744	0.00400914	0.0458434	yes
XLOC_009126	Bcl6	chr16:23965137-23988698	CR_Ileum	CR_Colon	OK	4.88322	1.41214	-1.78995	3.60539	0.000311684	0.00566615	yes
XLOC_006493	Map3k1	chr13:112536640-112608795	CR_Ileum	CR_Colon	OK	9.94025	2.87281	-1.79082	4.28985	1.78798e-05	0.000475362	yes
XLOC_006235	Atxn1	chr13:45645101-46060366	CR_Ileum	CR_Colon	OK	8.9898	2.59345	-1.79342	4.12212	3.75404e-05	0.000913049	yes
XLOC_004446	Evpl	chr11:116081872-116100331	CR_Ileum	CR_Colon	OK	35.2054	10.149	-1.79446	3.4717	0.000517165	0.0086904	yes
XLOC_000885	Atg9a	chr1:75177432-75207353	CR_Ileum	CR_Colon	OK	61.9748	17.8299	-1.79738	3.46693	0.000526434	0.00882279	yes
XLOC_016564	Casz1	chr4:148178500-148330386	CR_Ileum	CR_Colon	OK	26.8042	7.7017	-1.79921	3.55982	0.000371115	0.00656182	yes
XLOC_005253	Scin	chr12:40786357-40860815	CR_Ileum	CR_Colon	OK	192.177	55.0302	-1.80414	3.15227	0.00162007	0.0222017	yes
XLOC_021106	Sema4b	chr7:87331726-87371410	CR_Ileum	CR_Colon	OK	35.9024	10.2801	-1.80423	4.57686	4.72012e-06	0.000146908	yes
XLOC_026278	Glod5	chrX:7581326-7595618	CR_Ileum	CR_Colon	OK	117.885	33.7128	-1.80601	4.23328	2.30306e-05	0.000595901	yes
XLOC_006196	Serpinb1a	chr13:32933960-32956207	CR_Ileum	CR_Colon	OK	470.035	134.178	-1.80862	3.22695	0.00125117	0.0179398	yes
XLOC_021421	Cdipt	chr7:134119862-134124015	CR_Ileum	CR_Colon	OK	143.36	40.8969	-1.80958	4.29071	1.781e-05	0.000473569	yes
XLOC_019384	Aqp1	chr6:55286292-55298549	CR_Ileum	CR_Colon	OK	91.7543	26.1591	-1.81046	4.47775	7.54329e-06	0.000222051	yes
XLOC_006751	Chdh	chr14:30822185-31340242	CR_Ileum	CR_Colon	OK	56.4616	16.0956	-1.8106	3.77434	0.000160433	0.00321941	yes
XLOC_008046	Pdzd2	chr15:12286808-12522311	CR_Ileum	CR_Colon	OK	1.02988	0.292033	-1.81828	3.56372	0.00036563	0.00648186	yes
XLOC_008963	Ifngr2	chr16:91547303-91564252	CR_Ileum	CR_Colon	OK	137.937	39.1096	-1.81841	4.24165	2.21886e-05	0.000575859	yes
XLOC_002475	Nudt4	chr10:95009639-95026851	CR_Ileum	CR_Colon	OK	230.01	65.2011	-1.81873	3.31522	0.000915715	0.0139416	yes
XLOC_020921	1600014C10Rik	chr7:38968235-38982584	CR_Ileum	CR_Colon	OK	7.61208	2.15049	-1.82362	3.5437	0.000394555	0.00690855	yes
XLOC_023074	Acsl1	chr8:47556395-47630840	CR_Ileum	CR_Colon	OK	13.7748	3.88992	-1.82422	3.96568	7.3188e-05	0.00163275	yes
XLOC_009819	H2-Q8	chr17:35531043-35542053	CR_Ileum	CR_Colon	OK	15.9095	4.49137	-1.82466	3.06696	0.00216246	0.0281054	yes
XLOC_022586	Fam53b	chr7:139900296-140005531	CR_Ileum	CR_Colon	OK	9.45306	2.66052	-1.82907	3.88429	0.000102629	0.00218908	yes
XLOC_011725	Ccnj	chr19:40905069-40923060	CR_Ileum	CR_Colon	OK	5.58271	1.56862	-1.83147	3.24589	0.00117083	0.0170108	yes
XLOC_002570	Lrp1	chr10:126975210-127058204	CR_Ileum	CR_Colon	OK	58.1322	16.2852	-1.83577	3.18415	0.0014518	0.0203054	yes
XLOC_002121	Stxbp5	chr10:9475266-9621677	CR_Ileum	CR_Colon	OK	10.6002	2.95493	-1.8429	3.99467	6.47847e-05	0.00146964	yes
XLOC_000819	Fam126b	chr1:58579570-58643177	CR_Ileum	CR_Colon	OK	5.45209	1.51558	-1.84694	4.16055	3.17484e-05	0.000790795	yes
XLOC_012497	Rxra	chr2:27532720-27618839	CR_Ileum	CR_Colon	OK	48.1955	13.3893	-1.84782	4.3494	1.36511e-05	0.000374274	yes
XLOC_026645	Bex1	chrX:132748510-132750052	CR_Ileum	CR_Colon	OK	6.95569	1.92912	-1.85025	2.96305	0.00304604	0.0368549	yes
XLOC_015126	Gtf2b	chr3:142428191-142446569	CR_Ileum	CR_Colon	OK	69.3519	19.2291	-1.85065	4.50704	6.57398e-06	0.000196804	yes
XLOC_023783	Scoc	chr8:85958391-85982338	CR_Ileum	CR_Colon	OK	11.518	3.19107	-1.85177	3.38161	0.000720615	0.0114672	yes
XLOC_013135	Csnk2a1	chr2:152052575-152107587	CR_Ileum	CR_Colon	OK	71.3527	19.7351	-1.8542	4.17335	3.00158e-05	0.000753041	yes
XLOC_011795	Dusp5	chr19:53603184-53616894	CR_Ileum	CR_Colon	OK	4.86289	1.34498	-1.85423	3.60048	0.000317631	0.00576058	yes
XLOC_023949	Bcar1	chr8:114234372-114267749	CR_Ileum	CR_Colon	OK	65.033	17.9594	-1.85643	4.51744	6.25907e-06	0.000188417	yes
XLOC_023951	Tmem170	chr8:114386922-114400776	CR_Ileum	CR_Colon	OK	17.6087	4.85379	-1.8591	4.07083	4.68467e-05	0.00110868	yes
XLOC_022917	Tnfsf13b	chr8:10006503-10036160	CR_Ileum	CR_Colon	OK	6.70823	1.84839	-1.85966	2.9003	0.00372802	0.0432753	yes
XLOC_021598	Tmem150b	chr7:4642529-4676941	CR_Ileum	CR_Colon	OK	48.2282	13.2832	-1.86027	3.10693	0.00189041	0.0251886	yes
XLOC_000605	Sccpdh	chr1:181598361-181617315	CR_Ileum	CR_Colon	OK	17.4661	4.80248	-1.8627	4.20459	2.61552e-05	0.000666271	yes
XLOC_012455	Rnf208	chr2:25095796-25099865	CR_Ileum	CR_Colon	OK	8.6967	2.38645	-1.8656	2.90493	0.00367339	0.042794	yes
XLOC_017706	Fosl2	chr5:32436908-32461487	CR_Ileum	CR_Colon	OK	82.2854	22.5619	-1.86675	3.71033	0.000206987	0.00400752	yes
XLOC_012922	Fmn1	chr2:113167892-113558377	CR_Ileum	CR_Colon	OK	8.075	2.21062	-1.86901	4.59956	4.23384e-06	0.000133324	yes
XLOC_004089	Lgals9	chr11:78774972-78798426	CR_Ileum	CR_Colon	OK	242.549	66.3415	-1.87029	3.52843	0.00041804	0.0072541	yes
XLOC_008074	Rnf19a	chr15:36169621-36213214	CR_Ileum	CR_Colon	OK	14.7669	4.0211	-1.87671	4.49865	6.83855e-06	0.000203767	yes
XLOC_003372	Slc35b1	chr11:95246019-95253088	CR_Ileum	CR_Colon	OK	150.162	40.667	-1.88459	3.24007	0.00119502	0.0172876	yes
XLOC_010039	Prkce	chr17:86564561-87057337	CR_Ileum	CR_Colon	OK	9.93704	2.69096	-1.8847	4.02879	5.60654e-05	0.00129593	yes
XLOC_022260	Slco2b1	chr7:106806313-106859850	CR_Ileum	CR_Colon	OK	8.53634	2.30936	-1.88612	4.13504	3.54889e-05	0.000870343	yes
XLOC_014648	Tnfsf10	chr3:27215605-27241945	CR_Ileum	CR_Colon	OK	12.1495	3.28299	-1.88782	4.26719	1.97948e-05	0.000520913	yes
XLOC_016060	Aldh1b1	chr4:45811893-45817480	CR_Ileum	CR_Colon	OK	339.203	91.5554	-1.88943	3.83271	0.000126741	0.00263089	yes
XLOC_006848	Pnp	chr14:51563977-51574468	CR_Ileum	CR_Colon	OK	74.7041	20.1565	-1.88994	4.42602	9.59871e-06	0.000274635	yes
XLOC_016707	B4galt1	chr4:40751633-40801031	CR_Ileum	CR_Colon	OK	50.3956	13.5894	-1.89082	4.09369	4.24557e-05	0.00101811	yes
XLOC_016299	Tesk2	chr4:116393542-116480299	CR_Ileum	CR_Colon	OK	28.7231	7.73732	-1.8923	4.17123	3.02954e-05	0.000759372	yes
XLOC_020357	Plbd1	chr6:136560591-136610414	CR_Ileum	CR_Colon	OK	103.762	27.9102	-1.89441	4.70376	2.55413e-06	8.47173e-05	yes
XLOC_023066	Fat1	chr8:46019432-46137628	CR_Ileum	CR_Colon	OK	39.0972	10.5141	-1.89475	3.85609	0.000115215	0.00241921	yes
XLOC_002970	Skp1a	chr11:52045496-52060360	CR_Ileum	CR_Colon	OK	183.84	49.2902	-1.89908	4.54998	5.365e-06	0.0001644	yes
XLOC_009321	Rwdd2b	chr16:87433575-87444632	CR_Ileum	CR_Colon	OK	26.305	7.05	-1.89964	4.03995	5.34625e-05	0.00124366	yes
XLOC_001591	Sgk1	chr10:21601989-21719710	CR_Ileum	CR_Colon	OK	9.62403	2.57805	-1.90036	3.57183	0.000354498	0.00631273	yes
XLOC_011218	Nr3c1	chr18:39557225-39695155	CR_Ileum	CR_Colon	OK	33.6987	8.9795	-1.90799	4.38532	1.15815e-05	0.000323599	yes
XLOC_007811	Apol9b	chr15:77559501-77566841	CR_Ileum	CR_Colon	OK	23.6988	6.30151	-1.91105	3.17188	0.00151453	0.0209977	yes
XLOC_016188	Inadl	chr4:98062516-98386296	CR_Ileum	CR_Colon	OK	30.4174	8.0844	-1.91168	3.76342	0.000167606	0.00334296	yes
XLOC_003476	Tmem106a	chr11:101443555-101453503	CR_Ileum	CR_Colon	OK	49.6475	13.1475	-1.91693	4.38502	1.15975e-05	0.000323923	yes
XLOC_000072	Inpp4a	chr1:37356737-37467580	CR_Ileum	CR_Colon	OK	7.99769	2.10466	-1.926	3.5803	0.000343199	0.00614553	yes
XLOC_006727	Zmiz1	chr14:26278389-26486356	CR_Ileum	CR_Colon	OK	45.7251	12.0202	-1.92753	4.21337	2.5159e-05	0.000644589	yes
XLOC_014057	Mall	chr2:127530125-127555674	CR_Ileum	CR_Colon	OK	199.513	52.4036	-1.92875	4.06319	4.84057e-05	0.00114036	yes
XLOC_008058	2014-03-06	chr15:31385649-31460792	CR_Ileum	CR_Colon	OK	52.3459	13.7468	-1.92898	4.41399	1.01483e-05	0.000288379	yes
XLOC_009202	Arhgap31	chr16:38598455-38713148	CR_Ileum	CR_Colon	OK	3.16933	0.831864	-1.92976	4.19866	2.68503e-05	0.000681787	yes
XLOC_002448	Apaf1	chr10:90452055-90545488	CR_Ileum	CR_Colon	OK	15.6385	4.10008	-1.93138	4.80546	1.54397e-06	5.39892e-05	yes
XLOC_013154	Hck	chr2:152933320-152977177	CR_Ileum	CR_Colon	OK	26.7347	6.9867	-1.93603	3.50072	0.000464	0.00793265	yes
XLOC_011832	Grk5	chr19:60965321-61173421	CR_Ileum	CR_Colon	OK	3.75279	0.980719	-1.93605	3.10271	0.00191759	0.0254667	yes
XLOC_025138	C2cd2l	chr9:44117319-44128446	CR_Ileum	CR_Colon	OK	37.8288	9.87851	-1.93712	4.45207	8.50462e-06	0.000246688	yes
XLOC_012642	Pkp4	chr2:58998862-59193265	CR_Ileum	CR_Colon	OK	35.0302	9.14171	-1.93806	4.55848	5.15259e-06	0.000158657	yes
XLOC_026343	Akap17b	chrX:34148177-34185409	CR_Ileum	CR_Colon	OK	0.655234	0.17042	-1.94291	2.91189	0.00359247	0.0420132	yes
XLOC_013435	Pax8	chr2:24274073-24335786	CR_Ileum	CR_Colon	OK	5.81368	1.51005	-1.94485	3.04798	0.00230388	0.0295629	yes
XLOC_016913	Lrrc19	chr4:94281210-94359924	CR_Ileum	CR_Colon	OK	40.5792	10.5373	-1.94523	4.22239	2.41723e-05	0.000622776	yes
XLOC_011043	Pmaip1	chr18:66618257-66625212	CR_Ileum	CR_Colon	OK	24.3577	6.29902	-1.95118	4.74069	2.12996e-06	7.21181e-05	yes
XLOC_019309	Zyx	chr6:42289945-42308394	CR_Ileum	CR_Colon	OK	84.3016	21.8003	-1.95121	4.33793	1.43834e-05	0.000392072	yes
XLOC_014965	Notch2	chr3:97817460-97954290	CR_Ileum	CR_Colon	OK	1.3247	0.341991	-1.95364	3.79226	0.000149281	0.00303034	yes
XLOC_015553	Mov10	chr3:104597749-104621481	CR_Ileum	CR_Colon	OK	21.7074	5.58029	-1.95977	4.65967	3.16721e-06	0.000102601	yes
XLOC_014664	Skil	chr3:30993698-31021499	CR_Ileum	CR_Colon	OK	22.5554	5.79752	-1.95997	4.81799	1.45014e-06	5.09846e-05	yes
XLOC_001929	Ntn4	chr10:93103718-93215091	CR_Ileum	CR_Colon	OK	8.2884	2.13016	-1.96013	3.85777	0.000114428	0.00240564	yes
XLOC_011833	Gm7102	chr19:61227305-61268752	CR_Ileum	CR_Colon	OK	3.6743	0.944217	-1.96028	3.06712	0.00216129	0.0280935	yes
XLOC_018587	Hsd17b11	chr5:104418783-104450815	CR_Ileum	CR_Colon	OK	172.1	44.2175	-1.96056	4.38654	1.15168e-05	0.000322035	yes
XLOC_007460	Kctd12	chr14:103375797-103381854	CR_Ileum	CR_Colon	OK	26.4523	6.76088	-1.96811	3.65533	0.000256848	0.00480494	yes
XLOC_014277	Elmo2	chr2:165113530-165151979	CR_Ileum	CR_Colon	OK	13.113	3.34492	-1.97096	3.75849	0.00017094	0.0034006	yes
XLOC_010241	4930539E08Rik	chr17:29032231-29052385	CR_Ileum	CR_Colon	OK	37.5816	9.57791	-1.97224	4.13765	3.50879e-05	0.000862465	yes
XLOC_004514	Sectm1b	chr11:120914736-120924883	CR_Ileum	CR_Colon	OK	223.462	56.8479	-1.97485	4.16932	3.05515e-05	0.000765272	yes
XLOC_007413	Rb1	chr14:73594505-73725735	CR_Ileum	CR_Colon	OK	27.1448	6.8987	-1.97628	3.92245	8.7653e-05	0.00190849	yes
XLOC_003083	-	chr11:66769859-66779328	CR_Ileum	CR_Colon	OK	117.808	29.8163	-1.98227	4.47232	7.73741e-06	0.000227043	yes
XLOC_006228	Gfod1	chr13:43290887-43399541	CR_Ileum	CR_Colon	OK	2.09593	0.530419	-1.98239	3.79128	0.000149875	0.0030398	yes
XLOC_017817	Nipal1	chr5:73038993-73062317	CR_Ileum	CR_Colon	OK	29.6117	7.48619	-1.98387	4.92245	8.5468e-07	3.16629e-05	yes
XLOC_008216	Slc39a4	chr15:76442812-76447282	CR_Ileum	CR_Colon	OK	221.49	55.9379	-1.98535	4.25859	2.05719e-05	0.000538685	yes
XLOC_026719	Reps2	chrX:158849756-159081579	CR_Ileum	CR_Colon	OK	9.41997	2.37636	-1.98697	4.08781	4.3546e-05	0.00104021	yes
XLOC_003950	Chd3	chr11:69156628-69182991	CR_Ileum	CR_Colon	OK	45.5617	11.4873	-1.98778	3.67237	0.000240314	0.00454385	yes
XLOC_006167	Lrrc16a	chr13:24104298-24373100	CR_Ileum	CR_Colon	OK	18.2326	4.59325	-1.98893	4.78375	1.72053e-06	5.95116e-05	yes
XLOC_019663	Lpcat3	chr6:124613121-124662196	CR_Ileum	CR_Colon	OK	144.073	36.2891	-1.98919	3.91455	9.05713e-05	0.00196357	yes
XLOC_000829	Raph1	chr1:60540017-60623609	CR_Ileum	CR_Colon	OK	22.0973	5.54016	-1.99587	4.28646	1.81544e-05	0.000481627	yes
XLOC_025779	Xk	chrX:8849760-8890374	CR_Ileum	CR_Colon	OK	11.4428	2.86	-2.00035	4.73251	2.21758e-06	7.47031e-05	yes
XLOC_005757	Trim38	chr13:23871118-23883596	CR_Ileum	CR_Colon	OK	4.91209	1.22715	-2.00103	2.85411	0.00431577	0.0485572	yes
XLOC_018804	Tmem120a	chr5:136211359-136220114	CR_Ileum	CR_Colon	OK	120.605	30.0993	-2.00249	4.75835	1.95181e-06	6.66192e-05	yes
XLOC_014725	Spg20	chr3:54916029-54941254	CR_Ileum	CR_Colon	OK	7.7113	1.92068	-2.00536	3.84235	0.000121862	0.00254364	yes
XLOC_008826	Itgb5	chr16:33829750-33949424	CR_Ileum	CR_Colon	OK	39.9383	9.94377	-2.00591	4.47518	7.63462e-06	0.000224324	yes
XLOC_009497	Snx9	chr17:5840564-5931955	CR_Ileum	CR_Colon	OK	74.7421	18.6053	-2.00621	4.31418	1.60197e-05	0.000431433	yes
XLOC_021403	Il4ra	chr7:132695729-132722988	CR_Ileum	CR_Colon	OK	16.9356	4.21127	-2.00774	4.84802	1.24698e-06	4.45254e-05	yes
XLOC_010858	Galnt1	chr18:24363844-24448365	CR_Ileum	CR_Colon	OK	60.9254	15.1479	-2.00792	4.80573	1.54191e-06	5.39463e-05	yes
XLOC_024919	Limd1	chr9:123387802-123430670	CR_Ileum	CR_Colon	OK	38.4634	9.5515	-2.00969	4.93293	8.1006e-07	3.02318e-05	yes
XLOC_006768	Btd	chr14:32420411-32481383	CR_Ileum	CR_Colon	OK	24.3309	6.03992	-2.01019	4.03763	5.39932e-05	0.00125482	yes
XLOC_015066	Camk2d	chr3:126299280-126547972	CR_Ileum	CR_Colon	OK	57.5181	14.2539	-2.01266	4.70554	2.53189e-06	8.4055e-05	yes
XLOC_007203	Ddhd1	chr14:46206603-46277818	CR_Ileum	CR_Colon	OK	10.9842	2.71983	-2.01384	4.43479	9.2163e-06	0.000264773	yes
XLOC_011066	Myo5b	chr18:74602272-74931131	CR_Ileum	CR_Colon	OK	106.969	26.4464	-2.01605	3.38643	0.000708094	0.0112979	yes
XLOC_016958	Scp2	chr4:107716443-107791144	CR_Ileum	CR_Colon	OK	209.461	51.6575	-2.01963	3.9596	7.50769e-05	0.00167003	yes
XLOC_021374	Anks4b	chr7:127317075-127468866	CR_Ileum	CR_Colon	OK	103.092	25.3659	-2.02296	3.96039	7.48268e-05	0.00166513	yes
XLOC_024955	Panx1	chr9:14810228-14849922	CR_Ileum	CR_Colon	OK	41.6124	10.1925	-2.0295	5.09532	3.48158e-07	1.40077e-05	yes
XLOC_013904	Cat	chr2:103294060-103325710	CR_Ileum	CR_Colon	OK	105.437	25.8003	-2.03092	4.58651	4.50711e-06	0.00014099	yes
XLOC_016989	Faah	chr4:115669260-115690825	CR_Ileum	CR_Colon	OK	40.284	9.84528	-2.0327	3.91073	9.20179e-05	0.00199065	yes
XLOC_025231	1700017B05Rik	chr9:57100128-57110408	CR_Ileum	CR_Colon	OK	6.04642	1.4766	-2.03381	3.65764	0.000254547	0.00476793	yes
XLOC_006051	Mocs2	chr13:115591713-115619628	CR_Ileum	CR_Colon	OK	59.0212	14.3414	-2.04105	4.36634	1.26347e-05	0.000349467	yes
XLOC_002407	Gna11	chr10:80991468-81009142	CR_Ileum	CR_Colon	OK	290.956	70.4935	-2.04524	3.51272	0.000443546	0.00763466	yes
XLOC_002418	Slc41a2	chr10:82693590-82801044	CR_Ileum	CR_Colon	OK	14.133	3.41925	-2.04732	4.08569	4.39462e-05	0.00104857	yes
XLOC_021362	Tmc5	chr7:125740810-125824137	CR_Ileum	CR_Colon	OK	72.951	17.5887	-2.05228	4.43806	9.07729e-06	0.000261151	yes
XLOC_014049	Itpripl1	chr2:126964504-126969193	CR_Ileum	CR_Colon	OK	2.92955	0.706281	-2.05236	3.29775	0.000974644	0.0146669	yes
XLOC_026260	Clcn5	chrX:6730645-6834154	CR_Ileum	CR_Colon	OK	11.2417	2.70871	-2.05318	4.84224	1.28383e-06	4.56651e-05	yes
XLOC_013883	Cd82	chr2:93241404-93310031	CR_Ileum	CR_Colon	OK	312.353	75.2616	-2.05319	3.93381	8.36091e-05	0.00183139	yes
XLOC_006226	9530008L14Rik	chr13:41858516-41943019	CR_Ileum	CR_Colon	OK	64.423	15.5223	-2.05323	3.7635	0.000167554	0.00334222	yes
XLOC_013867	Madd,Nr1h3	chr2:90977386-91035358	CR_Ileum	CR_Colon	OK	34.6211	8.3336	-2.05464	4.45772	8.28365e-06	0.000241066	yes
XLOC_000391	Nuak2	chr1:134212701-134230109	CR_Ileum	CR_Colon	OK	52.3669	12.5804	-2.05748	4.77947	1.75761e-06	6.06525e-05	yes
XLOC_004134	Med13	chr11:86079216-86171841	CR_Ileum	CR_Colon	OK	17.959	4.30373	-2.06105	4.22536	2.38561e-05	0.00061511	yes
XLOC_011901	Capn1	chr19:5988544-6015825	CR_Ileum	CR_Colon	OK	149.194	35.7228	-2.06228	4.3415	1.41511e-05	0.000386641	yes
XLOC_011315	Me2	chr18:73924587-73977026	CR_Ileum	CR_Colon	OK	192.163	45.7264	-2.07123	3.73901	0.000184744	0.00363001	yes
XLOC_006500	Snx18	chr13:114382386-114408772	CR_Ileum	CR_Colon	OK	7.59617	1.80696	-2.07171	4.66863	3.0321e-06	9.87861e-05	yes
XLOC_004465	Socs3	chr11:117827392-117831684	CR_Ileum	CR_Colon	OK	14.5497	3.45811	-2.07294	4.27195	1.93768e-05	0.000511005	yes
XLOC_003219	Pitpna	chr11:75401576-75442874	CR_Ileum	CR_Colon	OK	231.394	54.9249	-2.07482	3.38406	0.000714233	0.0113801	yes
XLOC_006206	Eci3	chr13:35016277-35055678	CR_Ileum	CR_Colon	OK	29.6185	7.02019	-2.07692	4.46468	8.01879e-06	0.000234279	yes
XLOC_004929	Mpp5	chr12:79849889-79941700	CR_Ileum	CR_Colon	OK	26.7182	6.32509	-2.07866	4.73788	2.15967e-06	7.30072e-05	yes
XLOC_009735	Cyp4f16	chr17:32673573-32688742	CR_Ileum	CR_Colon	OK	127.378	30.0951	-2.08152	4.98217	6.28742e-07	2.4055e-05	yes
XLOC_016817	Ptgr1	chr4:58978461-58999994	CR_Ileum	CR_Colon	OK	36.7985	8.69289	-2.08174	4.20447	2.61691e-05	0.000666549	yes
XLOC_022584	Oat	chr7:139749155-139771510	CR_Ileum	CR_Colon	OK	255.842	60.4134	-2.08231	4.16616	3.09775e-05	0.000774197	yes
XLOC_020393	Itpr2	chr6:146056631-146450775	CR_Ileum	CR_Colon	OK	11.7132	2.7656	-2.08247	4.2808	1.86224e-05	0.000492511	yes
XLOC_012582	Ptgs1	chr2:36085928-36107790	CR_Ileum	CR_Colon	OK	5.10685	1.204	-2.08459	3.12689	0.00176665	0.0238761	yes
XLOC_016905	Cdkn2b	chr4:88949861-88957011	CR_Ileum	CR_Colon	OK	133.493	31.3359	-2.09088	4.67923	2.87952e-06	9.43129e-05	yes
XLOC_023666	Slc25a4	chr8:47292697-47296363	CR_Ileum	CR_Colon	OK	61.1471	14.3222	-2.09403	5.03395	4.80476e-07	1.88267e-05	yes
XLOC_006435	Iqgap2	chr13:96397131-96661897	CR_Ileum	CR_Colon	OK	160.578	37.5816	-2.09518	3.43802	0.000585991	0.00966776	yes
XLOC_001746	Ipmk	chr10:70810517-70848643	CR_Ileum	CR_Colon	OK	107.992	25.2593	-2.09604	4.26274	2.01933e-05	0.000530083	yes
XLOC_008892	Cd47	chr16:49855168-49915118	CR_Ileum	CR_Colon	OK	36.7653	8.57825	-2.09959	3.83991	0.000123079	0.00256566	yes
XLOC_020154	Eif4e3	chr6:99575130-99616765	CR_Ileum	CR_Colon	OK	5.82775	1.35938	-2.09999	3.99986	6.33788e-05	0.00144315	yes
XLOC_006304	2210016F16Rik	chr13:58481215-58487302	CR_Ileum	CR_Colon	OK	78.8087	18.291	-2.10722	4.86928	1.12008e-06	4.03904e-05	yes
XLOC_000269	Dgkd	chr1:89749858-89905128	CR_Ileum	CR_Colon	OK	81.2951	18.8186	-2.11101	3.26844	0.00108141	0.0159629	yes
XLOC_009113	Tmem41a	chr16:21825887-21947625	CR_Ileum	CR_Colon	OK	61.6197	14.2509	-2.11234	3.51753	0.000435582	0.00751517	yes
XLOC_014290	B4galt5	chr2:167123943-167174678	CR_Ileum	CR_Colon	OK	51.0875	11.8003	-2.11415	4.25759	2.06645e-05	0.000540727	yes
XLOC_005993	Lhfpl2	chr13:94827750-94965446	CR_Ileum	CR_Colon	OK	31.6034	7.24392	-2.12524	5.10693	3.27441e-07	1.32389e-05	yes
XLOC_001647	Mical1	chr10:41196000-41206836	CR_Ileum	CR_Colon	OK	18.0832	4.12703	-2.13147	4.92393	8.48251e-07	3.14912e-05	yes
XLOC_004068	Trp53i13	chr11:77321600-77326859	CR_Ileum	CR_Colon	OK	15.0959	3.44134	-2.13311	3.94926	7.83923e-05	0.00173112	yes
XLOC_025330	Fam83b	chr9:76335210-76415340	CR_Ileum	CR_Colon	OK	25.6418	5.84347	-2.1336	4.77375	1.80826e-06	6.21975e-05	yes
XLOC_011498	Gm962	chr19:5549136-5574195	CR_Ileum	CR_Colon	OK	8.23625	1.87605	-2.13429	2.95736	0.00310281	0.0373828	yes
XLOC_022656	Tollip	chr7:149067489-149088324	CR_Ileum	CR_Colon	OK	39.2018	8.88872	-2.14087	4.81105	1.5014e-06	5.26232e-05	yes
XLOC_005971	Lysmd3	chr13:81796751-81811854	CR_Ileum	CR_Colon	OK	18.7207	4.23032	-2.1458	4.92196	8.56824e-07	3.17212e-05	yes
XLOC_016609	Gnb1	chr4:154861664-154933378	CR_Ileum	CR_Colon	OK	346.39	78.1668	-2.14777	3.33422	0.000855379	0.0131885	yes
XLOC_007188	5730469M10Rik	chr14:41806977-41827096	CR_Ileum	CR_Colon	OK	15.0632	3.39011	-2.15163	3.91065	9.20485e-05	0.00199093	yes
XLOC_011245	Sema6a	chr18:47404907-47528677	CR_Ileum	CR_Colon	OK	16.1225	3.62445	-2.15324	4.92578	8.40245e-07	3.12324e-05	yes
XLOC_011002	Isoc1	chr18:58819001-58840431	CR_Ileum	CR_Colon	OK	50.3194	11.2747	-2.15803	5.0506	4.40432e-07	1.74019e-05	yes
XLOC_009301	Lipi	chr16:75540788-75567927	CR_Ileum	CR_Colon	OK	3.08942	0.691113	-2.16034	3.23483	0.00121715	0.0175528	yes
XLOC_019437	Cd8a	chr6:71302905-71329165	CR_Ileum	CR_Colon	OK	3.81383	0.852402	-2.16163	3.09823	0.00194681	0.0257778	yes
XLOC_018833	6430598A04Rik	chr5:138172157-138182827	CR_Ileum	CR_Colon	OK	9.74434	2.17242	-2.16526	4.12769	3.66421e-05	0.000893942	yes
XLOC_005439	Itpk1	chr12:103806745-103944509	CR_Ileum	CR_Colon	OK	213.634	47.615	-2.16565	4.08746	4.36129e-05	0.00104135	yes
XLOC_010366	-	chr17:36233918-36247907	CR_Ileum	CR_Colon	OK	5.15365	1.14293	-2.17286	3.9074	9.32952e-05	0.00201241	yes
XLOC_022951	Kbtbd11	chr8:15011024-15033332	CR_Ileum	CR_Colon	OK	33.4972	7.4249	-2.1736	4.79121	1.65782e-06	5.76296e-05	yes
XLOC_011631	Rfk	chr19:17468532-17475839	CR_Ileum	CR_Colon	OK	554.976	122.779	-2.17636	3.58779	0.000333487	0.00600335	yes
XLOC_010573	Nlrc4	chr17:74794971-74858728	CR_Ileum	CR_Colon	OK	31.6894	7.01043	-2.17643	4.47282	7.71948e-06	0.000226637	yes
XLOC_016464	Luzp1	chr4:136025675-136158691	CR_Ileum	CR_Colon	OK	45.6499	10.0987	-2.17644	4.10795	3.99195e-05	0.000964367	yes
XLOC_023459	Dpep1	chr8:125710134-125725713	CR_Ileum	CR_Colon	OK	514.276	113.326	-2.18206	3.44896	0.000562751	0.00934403	yes
XLOC_011044	Gm9926	chr18:66663345-66677586	CR_Ileum	CR_Colon	OK	32.3834	7.12106	-2.18509	3.89814	9.69343e-05	0.00208241	yes
XLOC_011454	1810055G02Rik	chr19:3708305-3717881	CR_Ileum	CR_Colon	OK	26.452	5.81341	-2.18592	4.69145	2.71276e-06	8.93651e-05	yes
XLOC_013697	Tfpi	chr2:84273015-84317006	CR_Ileum	CR_Colon	OK	8.25871	1.81177	-2.18852	2.9006	0.00372455	0.0432437	yes
XLOC_002246	Man1a	chr10:53624593-53795617	CR_Ileum	CR_Colon	OK	56.0855	12.2953	-2.18952	5.03735	4.72019e-07	1.85313e-05	yes
XLOC_023731	Pgpep1	chr8:73170334-73184283	CR_Ileum	CR_Colon	OK	49.1779	10.7696	-2.19104	4.53338	5.80477e-06	0.000176407	yes
XLOC_005287	Sec23a	chr12:60059370-60113004	CR_Ileum	CR_Colon	OK	53.6058	11.662	-2.20057	4.99678	5.8295e-07	2.24655e-05	yes
XLOC_016003	-	chr4:40806004-40847370	CR_Ileum	CR_Colon	OK	3.78535	0.82162	-2.20388	3.91058	9.20745e-05	0.0019913	yes
XLOC_009124	Sst	chr16:23889666-23890930	CR_Ileum	CR_Colon	OK	32.2166	6.98729	-2.205	4.18994	2.79029e-05	0.000705533	yes
XLOC_025844	Pgrmc1	chrX:34138219-34146074	CR_Ileum	CR_Colon	OK	178.752	38.7673	-2.20505	5.35508	8.55183e-08	3.90307e-06	yes
XLOC_004115	Ccl5	chr11:83339280-83344020	CR_Ileum	CR_Colon	OK	50.7807	10.98	-2.2094	3.79213	0.00014936	0.00303128	yes
XLOC_017064	Mfsd2a	chr4:122624055-122638464	CR_Ileum	CR_Colon	OK	4.69066	1.01421	-2.20943	3.76888	0.000163982	0.00328335	yes
XLOC_011229	Spink3	chr18:43887722-43896891	CR_Ileum	CR_Colon	OK	1205.64	260.657	-2.20957	5.32245	1.02379e-07	4.58963e-06	yes
XLOC_007780	Grina	chr15:76077195-76080334	CR_Ileum	CR_Colon	OK	135.799	29.3349	-2.21079	5.41317	6.19183e-08	2.90262e-06	yes
XLOC_015347	Lrat	chr3:82680626-82747560	CR_Ileum	CR_Colon	OK	6.07324	1.30973	-2.2132	4.74973	2.03693e-06	6.92542e-05	yes
XLOC_020730	Ceacam20,Nlrp9b	chr7:20550700-20648380	CR_Ileum	CR_Colon	OK	155.122	33.3013	-2.21976	3.74986	0.000176933	0.0035007	yes
XLOC_021342	Adm	chr7:117771182-117773333	CR_Ileum	CR_Colon	OK	4.09075	0.877361	-2.22112	3.3291	0.000871287	0.0133856	yes
XLOC_001741	Ank3	chr10:68996455-69490184	CR_Ileum	CR_Colon	OK	3.13098	0.669609	-2.22523	3.79979	0.00014482	0.00295128	yes
XLOC_016225	Dhcr24	chr4:106233642-106261718	CR_Ileum	CR_Colon	OK	212.597	45.4261	-2.22653	4.0693	4.71539e-05	0.00111477	yes
XLOC_025315	Gcom1	chr9:71352153-71440167	CR_Ileum	CR_Colon	OK	28.0564	5.99208	-2.2272	4.619	3.85593e-06	0.000122676	yes
XLOC_001458	-	chr1:135024336-135027511	CR_Ileum	CR_Colon	OK	1.19754	0.254754	-2.2329	3.30268	0.00095767	0.0144516	yes
XLOC_018838	Cyp3a13	chr5:138316826-138362847	CR_Ileum	CR_Colon	OK	143.405	30.3798	-2.23891	4.56229	5.05988e-06	0.000156148	yes
XLOC_026828	Ube1y1,Zfy1	chrY:6983-184328	CR_Ileum	CR_Colon	OK	28.0982	5.94153	-2.24157	3.90975	9.23907e-05	0.00199716	yes
XLOC_004119	Dusp14	chr11:83861542-83882299	CR_Ileum	CR_Colon	OK	3.23495	0.68359	-2.24254	3.00846	0.00262576	0.0327944	yes
XLOC_009135	1600021P15Rik	chr16:28826261-28929784	CR_Ileum	CR_Colon	OK	12.4516	2.63083	-2.24274	4.87808	1.07122e-06	3.88176e-05	yes
XLOC_005161	Crip1	chr12:114390222-114392090	CR_Ileum	CR_Colon	OK	5068.82	1070.56	-2.24329	3.69652	0.000218576	0.0041986	yes
XLOC_000013	Sgk3	chr1:9788210-9892649	CR_Ileum	CR_Colon	OK	2.04557	0.431125	-2.24632	3.67828	0.00023481	0.00445761	yes
XLOC_018564	Prkg2	chr5:99355908-99466378	CR_Ileum	CR_Colon	OK	16.6109	3.49605	-2.24834	4.50971	6.49154e-06	0.000194519	yes
XLOC_016301	Zswim5	chr4:116547876-116666980	CR_Ileum	CR_Colon	OK	6.44554	1.35437	-2.25068	3.71809	0.000200737	0.00390351	yes
XLOC_004232	Ikzf3	chr11:98322215-98407437	CR_Ileum	CR_Colon	OK	1.28986	0.270975	-2.25098	2.98055	0.00287734	0.0352302	yes
XLOC_010325	Cfb	chr17:34993318-34999459	CR_Ileum	CR_Colon	OK	110.531	23.2152	-2.25131	5.25793	1.45685e-07	6.33664e-06	yes
XLOC_003234	Slc6a4	chr11:76812098-76845890	CR_Ileum	CR_Colon	OK	31.5078	6.59933	-2.25532	4.97439	6.54537e-07	2.49473e-05	yes
XLOC_021594	Ptprh	chr7:4500204-4555643	CR_Ileum	CR_Colon	OK	136.34	28.4403	-2.2612	3.96863	7.22862e-05	0.00161458	yes
XLOC_019884	Dgki	chr6:36787656-37250135	CR_Ileum	CR_Colon	OK	0.660323	0.137173	-2.26718	3.14394	0.0016669	0.0227327	yes
XLOC_005872	Sfxn1	chr13:54167206-54203714	CR_Ileum	CR_Colon	OK	79.6361	16.4466	-2.27563	5.61118	2.00948e-08	1.04267e-06	yes
XLOC_005652	Tubal3	chr13:3923768-3935791	CR_Ileum	CR_Colon	OK	44.6668	9.21864	-2.27658	4.42638	9.58282e-06	0.000274274	yes
XLOC_016624	Fam132a,Ube2j2	chr4:155317840-155340738	CR_Ileum	CR_Colon	OK	54.0631	11.1498	-2.27763	4.41416	1.01403e-05	0.000288225	yes
XLOC_006849	Pnp2	chr14:51575815-51584424	CR_Ileum	CR_Colon	OK	113.495	23.3794	-2.27931	5.55435	2.7864e-08	1.40478e-06	yes
XLOC_000657	Lpgat1	chr1:193541902-193608134	CR_Ileum	CR_Colon	OK	29.1813	6.00781	-2.28013	5.32656	1.00089e-07	4.49965e-06	yes
XLOC_015058	Pde5a	chr3:122432075-122574591	CR_Ileum	CR_Colon	OK	26.9493	5.54638	-2.28063	5.12934	2.90766e-07	1.1875e-05	yes
XLOC_018926	Gm8615	chr5:149931140-149995639	CR_Ileum	CR_Colon	OK	11.1458	2.29251	-2.28151	4.68842	2.75317e-06	9.05486e-05	yes
XLOC_013480	Agpat2	chr2:26448593-26460016	CR_Ileum	CR_Colon	OK	345.112	70.8735	-2.28375	3.90427	9.45104e-05	0.00203664	yes
XLOC_020008	Gprin3	chr6:59290691-59376343	CR_Ileum	CR_Colon	OK	8.43831	1.73287	-2.2838	5.71711	1.08351e-08	5.89617e-07	yes
XLOC_010877	Camk4	chr18:33098694-33356308	CR_Ileum	CR_Colon	OK	1.70026	0.348859	-2.28504	4.67156	2.98922e-06	9.75033e-05	yes
XLOC_009029	Socs1	chr16:10783901-10785629	CR_Ileum	CR_Colon	OK	14.8505	3.04565	-2.28569	3.55962	0.000371391	0.00656618	yes
XLOC_011859	2010003K11Rik	chr19:4496787-4498583	CR_Ileum	CR_Colon	OK	65.1839	13.3478	-2.28791	5.60974	2.02626e-08	1.05113e-06	yes
XLOC_011666	Jak2	chr19:29326317-29387570	CR_Ileum	CR_Colon	OK	46.592	9.53652	-2.28855	5.52561	3.28337e-08	1.63345e-06	yes
XLOC_023471	Rhou	chr8:126177828-126187780	CR_Ileum	CR_Colon	OK	36.6965	7.48292	-2.29397	5.69909	1.2045e-08	6.49727e-07	yes
XLOC_012710	Osbpl6	chr2:76244477-76438714	CR_Ileum	CR_Colon	OK	9.41356	1.91927	-2.29418	4.02529	5.69045e-05	0.00131259	yes
XLOC_010544	Rab31	chr17:66001065-66122092	CR_Ileum	CR_Colon	OK	6.07145	1.23692	-2.29529	3.82701	0.000129709	0.00268472	yes
XLOC_016795	Abca1	chr4:53043542-53172767	CR_Ileum	CR_Colon	OK	1.91068	0.389024	-2.29615	3.61866	0.000296135	0.00542104	yes
XLOC_005962	Glrx	chr13:75977333-75987599	CR_Ileum	CR_Colon	OK	347.754	70.7487	-2.29729	5.34876	8.85582e-08	4.02363e-06	yes
XLOC_005438	Lgmn	chr12:103632307-103677907	CR_Ileum	CR_Colon	OK	42.2756	8.59727	-2.29787	5.53904	3.0414e-08	1.52469e-06	yes
XLOC_008811	Pcyt1a	chr16:32431006-32475151	CR_Ileum	CR_Colon	OK	36.7487	7.46741	-2.29901	5.5352	3.10869e-08	1.55526e-06	yes
XLOC_000083	Map4k4	chr1:39957600-40084729	CR_Ileum	CR_Colon	OK	16.3982	3.33088	-2.29956	4.72791	2.26842e-06	7.62885e-05	yes
XLOC_017448	-	chr4:79649074-79650988	CR_Ileum	CR_Colon	OK	6.37604	1.29208	-2.30297	4.21639	2.48246e-05	0.000637197	yes
XLOC_000906	Dock10	chr1:80497647-80755128	CR_Ileum	CR_Colon	OK	0.492393	0.0996948	-2.30422	2.93124	0.00337614	0.0399609	yes
XLOC_011263	Synpo	chr18:60752728-60819881	CR_Ileum	CR_Colon	OK	42.1982	8.51669	-2.30882	4.90656	9.26883e-07	3.40933e-05	yes
XLOC_014651	Tnik	chr3:28156709-28569507	CR_Ileum	CR_Colon	OK	9.07924	1.83124	-2.30975	4.93215	8.13296e-07	3.03474e-05	yes
XLOC_023416	Plcg2	chr8:120022190-120159042	CR_Ileum	CR_Colon	OK	12.8183	2.58238	-2.31144	5.35716	8.4539e-08	3.86076e-06	yes
XLOC_015954	Cdh17	chr4:11685303-11745052	CR_Ileum	CR_Colon	OK	528.243	106.339	-2.31253	3.32433	0.000886312	0.0135759	yes
XLOC_011413	-	chr18:61751052-61754989	CR_Ileum	CR_Colon	OK	1.78795	0.359674	-2.31355	3.85698	0.000114798	0.0024116	yes
XLOC_007234	Rpph1	chr14:51427121-51427446	CR_Ileum	CR_Colon	OK	26.7523	5.37816	-2.31448	3.06997	0.00214079	0.0278719	yes
XLOC_024457	Usp2	chr9:43875103-43903710	CR_Ileum	CR_Colon	OK	22.2351	4.46412	-2.31639	4.2466	2.17039e-05	0.00056473	yes
XLOC_007973	Slc4a8	chr15:100592177-100654402	CR_Ileum	CR_Colon	OK	0.403281	0.0809217	-2.31719	3.1461	0.00165463	0.0225904	yes
XLOC_024750	Slco2a1	chr9:102891097-102993342	CR_Ileum	CR_Colon	OK	33.8958	6.74735	-2.32872	5.02693	4.98383e-07	1.94563e-05	yes
XLOC_021486	Ptpre	chr7:142726679-142877977	CR_Ileum	CR_Colon	OK	7.96451	1.58301	-2.33091	4.83048	1.36205e-06	4.81851e-05	yes
XLOC_017211	Cda	chr4:137894442-137923949	CR_Ileum	CR_Colon	OK	96.8402	19.0675	-2.34449	5.0539	4.32871e-07	1.71367e-05	yes
XLOC_011912	Ccdc88b	chr19:6919111-6932840	CR_Ileum	CR_Colon	OK	1.67839	0.330066	-2.34625	3.14215	0.00167715	0.0228472	yes
XLOC_026025	Heph	chrX:93650774-93769823	CR_Ileum	CR_Colon	OK	92.6358	18.1344	-2.35284	4.52242	6.1137e-06	0.000184466	yes
XLOC_001751	Bcr	chr10:74523338-74647668	CR_Ileum	CR_Colon	OK	26.2622	5.13809	-2.35368	4.82569	1.39519e-06	4.92476e-05	yes
XLOC_024822	Pfkfb4	chr9:108889912-108934943	CR_Ileum	CR_Colon	OK	40.7485	7.95083	-2.35757	5.20277	1.96337e-07	8.323e-06	yes
XLOC_014547	-	chr2:151928453-151931184	CR_Ileum	CR_Colon	OK	0.793966	0.15439	-2.3625	3.0054	0.00265229	0.0330578	yes
XLOC_010508	Plin3	chr17:56416303-56430448	CR_Ileum	CR_Colon	OK	158.872	30.8493	-2.36456	5.53051	3.19301e-08	1.59308e-06	yes
XLOC_007799	Gpt	chr15:76527193-76530105	CR_Ileum	CR_Colon	OK	136.948	26.5221	-2.36835	5.78919	7.07284e-09	3.9825e-07	yes
XLOC_003847	Cdc42se2	chr11:54530916-54601205	CR_Ileum	CR_Colon	OK	87.6023	16.924	-2.3719	5.3326	9.68171e-08	4.3676e-06	yes
XLOC_021126	Mex3b	chr7:90015842-90020086	CR_Ileum	CR_Colon	OK	2.2296	0.42851	-2.37938	3.97171	7.13576e-05	0.00159547	yes
XLOC_000825	Als2,Als2cr4,Mpp4	chr1:59157436-59296193	CR_Ileum	CR_Colon	OK	15.6177	3.00113	-2.3796	3.77433	0.000160441	0.00321941	yes
XLOC_023422	Osgin1	chr8:121961061-121970156	CR_Ileum	CR_Colon	OK	41.7283	8.01679	-2.37993	5.94597	2.74829e-09	1.65352e-07	yes
XLOC_022952	-	chr8:15036813-15040783	CR_Ileum	CR_Colon	OK	2.22728	0.42782	-2.38021	2.8655	0.00416347	0.0472169	yes
XLOC_007388	Slc25a37	chr14:69859893-69903899	CR_Ileum	CR_Colon	OK	65.483	12.5591	-2.38238	4.0504	5.11298e-05	0.00119593	yes
XLOC_011215	Gnpda1	chr18:38487190-38498647	CR_Ileum	CR_Colon	OK	46.1132	8.81789	-2.38667	5.54184	2.99318e-08	1.50357e-06	yes
XLOC_016637	Plag1	chr4:3825977-3865562	CR_Ileum	CR_Colon	OK	1.19726	0.227975	-2.39279	3.40508	0.000661446	0.0106818	yes
XLOC_024333	Eepd1	chr9:25289181-25411695	CR_Ileum	CR_Colon	OK	12.0707	2.29732	-2.39349	4.06939	4.71367e-05	0.0011146	yes
XLOC_000382	Pm20d1	chr1:133693971-133714692	CR_Ileum	CR_Colon	OK	34.2059	6.49166	-2.39759	6.04706	1.4751e-09	9.24045e-08	yes
XLOC_017836	C530008M17Rik	chr5:77084429-77302582	CR_Ileum	CR_Colon	OK	53.7919	10.1996	-2.39888	3.30972	0.000933908	0.0141515	yes
XLOC_017085	Mtap7d1	chr4:125909341-125933573	CR_Ileum	CR_Colon	OK	10.6823	2.02123	-2.40191	4.39072	1.12974e-05	0.000316695	yes
XLOC_023385	Phlpp2	chr8:112392023-112486133	CR_Ileum	CR_Colon	OK	22.2848	4.20713	-2.40515	3.85748	0.000114564	0.00240804	yes
XLOC_005188	Ubxn2a	chr12:4881919-4914696	CR_Ileum	CR_Colon	OK	62.9993	11.8635	-2.4088	4.71274	2.44408e-06	8.15664e-05	yes
XLOC_026152	Rnf128	chrX:136097672-136207921	CR_Ileum	CR_Colon	OK	189.051	35.3481	-2.41907	4.69397	2.67951e-06	8.84402e-05	yes
XLOC_014284	Sulf2	chr2:165818121-165981156	CR_Ileum	CR_Colon	OK	13.8086	2.58034	-2.41994	3.67599	0.000236925	0.00449086	yes
XLOC_020937	Siglec5	chr7:50606723-50615186	CR_Ileum	CR_Colon	OK	8.1349	1.51804	-2.42192	4.141	3.45798e-05	0.000852429	yes
XLOC_013453	Uap1l1	chr2:25214999-25221303	CR_Ileum	CR_Colon	OK	55.6103	10.3646	-2.42369	5.03545	4.76726e-07	1.86962e-05	yes
XLOC_020296	Clec2e	chr6:129041833-129052933	CR_Ileum	CR_Colon	OK	71.2569	13.2799	-2.42378	5.54325	2.96912e-08	1.49283e-06	yes
XLOC_016219	1700024P16Rik	chr4:104585976-104689703	CR_Ileum	CR_Colon	OK	6.1201	1.13927	-2.42545	3.32654	0.000879308	0.0134835	yes
XLOC_022275	P2ry2	chr7:108135755-108161364	CR_Ileum	CR_Colon	OK	23.9251	4.44736	-2.4275	4.57823	4.68918e-06	0.000146052	yes
XLOC_019891	Hipk2	chr6:38647830-38826604	CR_Ileum	CR_Colon	OK	7.58675	1.40889	-2.42892	4.9681	6.76106e-07	2.56769e-05	yes
XLOC_003377	Phospho1	chr11:95685782-95707045	CR_Ileum	CR_Colon	OK	29.6163	5.499	-2.42915	4.15067	3.31497e-05	0.00082146	yes
XLOC_017146	Smpdl3b	chr4:132288880-132313086	CR_Ileum	CR_Colon	OK	16.2071	3.00584	-2.43079	4.77538	1.7937e-06	6.1754e-05	yes
XLOC_013133	Srxn1	chr2:151931368-151937147	CR_Ileum	CR_Colon	OK	175.509	32.497	-2.43317	5.35776	8.42581e-08	3.85031e-06	yes
XLOC_006303	Kif27	chr13:58386123-58460430	CR_Ileum	CR_Colon	OK	2.25582	0.416657	-2.43672	3.66059	0.000251634	0.00472251	yes
XLOC_014832	Pklr	chr3:88940063-88964079	CR_Ileum	CR_Colon	OK	137.545	25.2947	-2.443	5.43687	5.4225e-08	2.57814e-06	yes
XLOC_018548	Ankrd56	chr5:93470148-93474048	CR_Ileum	CR_Colon	OK	30.676	5.63805	-2.44384	6.15317	7.59508e-10	4.96791e-08	yes
XLOC_009736	Gm9705	chr17:32758263-32773129	CR_Ileum	CR_Colon	OK	3.0775	0.565497	-2.44417	4.13134	3.60654e-05	0.000882297	yes
XLOC_008679	Ciita	chr16:10488371-10543169	CR_Ileum	CR_Colon	OK	2.39332	0.438066	-2.44979	3.78817	0.000151759	0.0030724	yes
XLOC_009895	Clic5	chr17:44271624-44417599	CR_Ileum	CR_Colon	OK	93.5514	17.1079	-2.45109	4.78706	1.69246e-06	5.87051e-05	yes
XLOC_015328	Bche	chr3:73439724-73512337	CR_Ileum	CR_Colon	OK	22.9073	4.18205	-2.45353	5.78473	7.26288e-09	4.08123e-07	yes
XLOC_000319	Gm9994	chr1:95815013-95913854	CR_Ileum	CR_Colon	OK	25.7854	4.70328	-2.45481	3.65099	0.000261228	0.00487539	yes
XLOC_018513	Ugt2b36	chr5:87494951-87521580	CR_Ileum	CR_Colon	OK	5.7374	1.046	-2.45552	4.03743	5.404e-05	0.00125564	yes
XLOC_020269	Plekhg6	chr6:125312668-125330578	CR_Ileum	CR_Colon	OK	57.959	10.4901	-2.46601	4.98364	6.23978e-07	2.38974e-05	yes
XLOC_008108	Ext1	chr15:52899817-53177738	CR_Ileum	CR_Colon	OK	26.0754	4.7192	-2.46608	5.90975	3.42621e-09	2.02897e-07	yes
XLOC_021447	Itgam	chr7:135206153-135262005	CR_Ileum	CR_Colon	OK	3.54254	0.640003	-2.46864	3.66952	0.000243004	0.00458612	yes
XLOC_003181	Itgae	chr11:72904096-72961084	CR_Ileum	CR_Colon	OK	3.28032	0.590946	-2.47274	2.87016	0.00410264	0.0466518	yes
XLOC_017633	Fgl2	chr5:20798778-20930495	CR_Ileum	CR_Colon	OK	27.7925	5.00296	-2.47384	6.07281	1.25693e-09	7.94771e-08	yes
XLOC_010455	Ppp2r5d	chr17:46818018-46841951	CR_Ileum	CR_Colon	OK	68.5489	12.3297	-2.47499	4.59393	4.34975e-06	0.000136567	yes
XLOC_007396	Pdlim2	chr14:70564024-70577611	CR_Ileum	CR_Colon	OK	94.9407	17.0761	-2.47505	5.29527	1.18843e-07	5.26708e-06	yes
XLOC_005180	Efr3b	chr12:3962553-4038915	CR_Ileum	CR_Colon	OK	0.572442	0.102791	-2.47741	3.53489	0.000407941	0.00710604	yes
XLOC_003077	Pmp22	chr11:62945011-62973048	CR_Ileum	CR_Colon	OK	764.254	136.583	-2.48428	3.89702	9.73831e-05	0.00209104	yes
XLOC_021527	B4galnt4	chr7:148246553-148258276	CR_Ileum	CR_Colon	OK	6.54909	1.16975	-2.48509	4.33366	1.46654e-05	0.00039878	yes
XLOC_011842	Aldh3b1	chr19:3913490-3929759	CR_Ileum	CR_Colon	OK	21.2264	3.79039	-2.48545	4.96252	6.95837e-07	2.63362e-05	yes
XLOC_024582	Tle3	chr9:61220172-61266362	CR_Ileum	CR_Colon	OK	51.5604	9.18294	-2.48923	5.26934	1.36917e-07	5.99992e-06	yes
XLOC_018865	Ttyh3	chr5:141096529-141124985	CR_Ileum	CR_Colon	OK	55.7568	9.91126	-2.49201	5.51477	3.49227e-08	1.72617e-06	yes
XLOC_021865	Plekhg2	chr7:29144540-29157920	CR_Ileum	CR_Colon	OK	17.5497	3.11716	-2.49315	5.36969	7.88705e-08	3.62199e-06	yes
XLOC_009075	Prodh	chr16:18052952-18089283	CR_Ileum	CR_Colon	OK	31.2624	5.52051	-2.50156	4.26354	2.01216e-05	0.000528386	yes
XLOC_000799	Stk17b	chr1:53812355-53842059	CR_Ileum	CR_Colon	OK	58.1696	10.2182	-2.50912	6.01364	1.81399e-09	1.1196e-07	yes
XLOC_004697	-	chr11:101519567-101520265	CR_Ileum	CR_Colon	OK	8.99874	1.579	-2.51071	3.11476	0.00184096	0.0246802	yes
XLOC_009246	Tfg	chr16:56690439-56717630	CR_Ileum	CR_Colon	OK	154.838	27.1377	-2.51238	5.55731	2.73956e-08	1.38368e-06	yes
XLOC_000534	-	chr1:172909767-172917963	CR_Ileum	CR_Colon	OK	2.15782	0.377152	-2.51636	3.01842	0.00254096	0.0319733	yes
XLOC_011676	A1cf	chr19:31943247-32029842	CR_Ileum	CR_Colon	OK	27.8725	4.86533	-2.51823	4.8579	1.18639e-06	4.25327e-05	yes
XLOC_021544	Ap2a2	chr7:148748074-148819050	CR_Ileum	CR_Colon	OK	71.0923	12.3854	-2.52105	5.76295	8.26579e-09	4.59137e-07	yes
XLOC_005766	D130043K22Rik	chr13:24936999-24995017	CR_Ileum	CR_Colon	OK	1.85887	0.322386	-2.52757	3.49296	0.000477694	0.00812859	yes
XLOC_016672	2610029I01Rik	chr4:21654830-21699556	CR_Ileum	CR_Colon	OK	22.0488	3.82141	-2.52853	3.99248	6.53848e-05	0.00148098	yes
XLOC_022253	Dgat2	chr7:106302172-106331223	CR_Ileum	CR_Colon	OK	90.7152	15.6228	-2.53769	5.83966	5.23076e-09	3.00314e-07	yes
XLOC_004071	Pipox	chr11:77694077-77707584	CR_Ileum	CR_Colon	OK	11.3315	1.94967	-2.53904	4.28156	1.85589e-05	0.000491125	yes
XLOC_009084	Gp1bb,Sept5	chr16:18620382-18630031	CR_Ileum	CR_Colon	OK	363.493	62.5009	-2.53998	3.69255	0.000222015	0.00425324	yes
XLOC_015281	Nbea	chr3:55429119-55987666	CR_Ileum	CR_Colon	OK	2.08227	0.357333	-2.54282	4.67773	2.90069e-06	9.49365e-05	yes
XLOC_016115	-	chr4:59274589-59294859	CR_Ileum	CR_Colon	OK	3.25383	0.551694	-2.5602	3.40014	0.000673508	0.010845	yes
XLOC_014150	Abhd12	chr2:150658235-150730467	CR_Ileum	CR_Colon	OK	82.2016	13.8866	-2.56547	6.03695	1.57056e-09	9.79419e-08	yes
XLOC_019458	Mtrnr2l	chr6:79768024-79768358	CR_Ileum	CR_Colon	OK	122.395	20.6287	-2.56882	4.88966	1.01008e-06	3.68181e-05	yes
XLOC_008093	Lrp12	chr15:39701950-39775493	CR_Ileum	CR_Colon	OK	16.1652	2.72088	-2.57075	5.40699	6.40931e-08	2.99287e-06	yes
XLOC_016611	Slc35e2	chr4:154975524-155024048	CR_Ileum	CR_Colon	OK	16.3374	2.73889	-2.57652	3.47886	0.000503545	0.00849623	yes
XLOC_010551	9130404H23Rik	chr17:66898306-66948738	CR_Ileum	CR_Colon	OK	83.2193	13.8923	-2.58264	4.3446	1.39533e-05	0.000381847	yes
XLOC_004956	Acot4	chr12:85378688-85390124	CR_Ileum	CR_Colon	OK	18.0268	3.00837	-2.58309	4.47594	7.60769e-06	0.000223591	yes
XLOC_009716	Pim1	chr17:29625779-29633057	CR_Ileum	CR_Colon	OK	34.3414	5.72816	-2.5838	4.89987	9.59018e-07	3.51323e-05	yes
XLOC_001102	Rgs2	chr1:145846467-145851279	CR_Ileum	CR_Colon	OK	11.5747	1.92895	-2.58509	5.30602	1.12047e-07	4.98881e-06	yes
XLOC_009170	Kalrn	chr16:33969158-34514113	CR_Ileum	CR_Colon	OK	42.2264	7.02526	-2.58752	4.47239	7.73495e-06	0.000227001	yes
XLOC_008945	Bach1	chr16:87699198-87733648	CR_Ileum	CR_Colon	OK	39.0328	6.48465	-2.58959	5.65368	1.57048e-08	8.29812e-07	yes
XLOC_011167	Myo7b	chr18:32118887-32196661	CR_Ileum	CR_Colon	OK	151.876	25.1439	-2.59461	4.2492	2.14538e-05	0.000558683	yes
XLOC_000950	Rab17	chr1:92854706-92866364	CR_Ileum	CR_Colon	OK	69.318	11.4529	-2.59752	5.71557	1.09338e-08	5.94552e-07	yes
XLOC_021181	Gdpd5	chr7:106529985-106609494	CR_Ileum	CR_Colon	OK	8.28938	1.36609	-2.60122	4.9004	9.56439e-07	3.50551e-05	yes
XLOC_001051	Cdk18	chr1:134010123-134036288	CR_Ileum	CR_Colon	OK	58.2608	9.59865	-2.60162	5.80871	6.29556e-09	3.5784e-07	yes
XLOC_010666	-	chr17:15713197-15714385	CR_Ileum	CR_Colon	OK	1.58033	0.258789	-2.61038	3.13409	0.00172385	0.0233945	yes
XLOC_011516	Ehd1	chr19:6276895-6300096	CR_Ileum	CR_Colon	OK	75.4576	12.3471	-2.6115	6.42779	1.29469e-10	9.54819e-09	yes
XLOC_023606	Ddhd2	chr8:26835778-26864860	CR_Ileum	CR_Colon	OK	20.4732	3.34496	-2.61367	4.83995	1.29871e-06	4.6128e-05	yes
XLOC_008829	Mylk	chr16:34785035-35002813	CR_Ileum	CR_Colon	OK	48.8917	7.9734	-2.61632	5.67834	1.36006e-08	7.25357e-07	yes
XLOC_016397	Marcksl1	chr4:129172270-129193225	CR_Ileum	CR_Colon	OK	48.2685	7.87079	-2.6165	5.42553	5.77816e-08	2.73494e-06	yes
XLOC_017608	4930420K17Rik	chr5:9100717-9161776	CR_Ileum	CR_Colon	OK	55.1748	8.96434	-2.62174	4.23823	2.25288e-05	0.000583938	yes
XLOC_001209	Gm7694,Nos1ap	chr1:172225475-172519980	CR_Ileum	CR_Colon	OK	23.8629	3.87448	-2.6227	4.64172	3.45519e-06	0.000110911	yes
XLOC_011936	Slc3a2	chr19:8781371-8797934	CR_Ileum	CR_Colon	OK	107.255	17.412	-2.62289	6.08092	1.19497e-09	7.57316e-08	yes
XLOC_007299	Cideb	chr14:56364529-56377261	CR_Ileum	CR_Colon	OK	237.369	38.3438	-2.63007	5.67334	1.40042e-08	7.45807e-07	yes
XLOC_007120	Zfp503	chr14:22803183-22808823	CR_Ileum	CR_Colon	OK	4.2717	0.689448	-2.6313	4.36729	1.25796e-05	0.000348192	yes
XLOC_019784	Far2	chr6:147995806-148392874	CR_Ileum	CR_Colon	OK	13.9402	2.24236	-2.63616	3.049	0.00229604	0.029498	yes
XLOC_023445	Zfpm1	chr8:124806021-124861931	CR_Ileum	CR_Colon	OK	4.94513	0.792317	-2.64186	4.66297	3.11684e-06	0.000101131	yes
XLOC_006873	-	chr14:54742473-54765847	CR_Ileum	CR_Colon	OK	3.20411	0.510493	-2.64996	3.23306	0.00122472	0.0176426	yes
XLOC_010832	Lama3	chr18:12492463-12744998	CR_Ileum	CR_Colon	OK	16.3399	2.60025	-2.65168	5.74576	9.15109e-09	5.04027e-07	yes
XLOC_010861	Mocos	chr18:24812191-24860057	CR_Ileum	CR_Colon	OK	16.0107	2.52685	-2.66363	5.90909	3.44007e-09	2.03501e-07	yes
XLOC_010086	Slc22a3	chr17:12612839-12700570	CR_Ileum	CR_Colon	OK	1.11373	0.174997	-2.66999	3.694	0.000220758	0.00423135	yes
XLOC_007763	-	chr15:74901263-75127809	CR_Ileum	CR_Colon	OK	39.7121	6.23357	-2.67145	4.13002	3.62727e-05	0.000886487	yes
XLOC_022949	Cln8	chr8:14888040-14901783	CR_Ileum	CR_Colon	OK	10.6409	1.6582	-2.68194	5.64152	1.6856e-08	8.84118e-07	yes
XLOC_012208	-	chr19:61282831-61284096	CR_Ileum	CR_Colon	OK	1.35495	0.209937	-2.69021	3.04018	0.00236441	0.0302087	yes
XLOC_007813	Csf2rb	chr15:78156419-78181431	CR_Ileum	CR_Colon	OK	0.284788	0.0440812	-2.69165	3.02093	0.00252002	0.0317675	yes
XLOC_007374	Ephx2	chr14:66703213-66743337	CR_Ileum	CR_Colon	OK	57.4227	8.88142	-2.69276	5.96529	2.44206e-09	1.47889e-07	yes
XLOC_002443	Gas2l3	chr10:88871567-88906712	CR_Ileum	CR_Colon	OK	5.20839	0.805468	-2.69294	5.00299	5.64471e-07	2.18063e-05	yes
XLOC_023554	Defb37	chr8:18986232-18991055	CR_Ileum	CR_Colon	OK	20.4486	3.13254	-2.7066	3.89003	0.000100232	0.00214351	yes
XLOC_017304	Rbp7	chr4:148823795-148829077	CR_Ileum	CR_Colon	OK	11.0867	1.69683	-2.70791	3.28944	0.00100385	0.015015	yes
XLOC_013983	Rhov	chr2:119094936-119096962	CR_Ileum	CR_Colon	OK	4.81589	0.734744	-2.71249	4.44331	8.85835e-06	0.000255747	yes
XLOC_014155	Snph	chr2:151416151-151458600	CR_Ileum	CR_Colon	OK	5.74476	0.871938	-2.71995	4.79586	1.61977e-06	5.64039e-05	yes
XLOC_022786	-	chr7:91304504-91310143	CR_Ileum	CR_Colon	OK	1.30643	0.19798	-2.72221	4.29218	1.76926e-05	0.000470837	yes
XLOC_014185	Snta1	chr2:154202049-154233820	CR_Ileum	CR_Colon	OK	9.72754	1.46039	-2.73572	4.80541	1.54435e-06	5.39892e-05	yes
XLOC_006614	-	chr13:75968412-75972962	CR_Ileum	CR_Colon	OK	1.2254	0.183617	-2.73848	4.0643	4.81758e-05	0.00113554	yes
XLOC_004803	Cmpk2	chr12:27154079-27175383	CR_Ileum	CR_Colon	OK	26.4542	3.92488	-2.75278	5.3308	9.77829e-08	4.40402e-06	yes
XLOC_014978	Igsf3	chr3:101181012-101267916	CR_Ileum	CR_Colon	OK	12.6274	1.86823	-2.75681	6.28927	3.18966e-10	2.19561e-08	yes
XLOC_001870	2210404O07Rik	chr10:80855754-80893863	CR_Ileum	CR_Colon	OK	1461.42	215.568	-2.76115	4.36378	1.27833e-05	0.000353179	yes
XLOC_009777	Btnl3	chr17:34514076-34522973	CR_Ileum	CR_Colon	OK	165.399	24.3069	-2.76651	5.99368	2.05151e-09	1.25746e-07	yes
XLOC_011747	Entpd7	chr19:43764178-43843128	CR_Ileum	CR_Colon	OK	14.665	2.15309	-2.76789	3.99784	6.39242e-05	0.00145308	yes
XLOC_000859	Fn1	chr1:71632096-71699779	CR_Ileum	CR_Colon	OK	0.968316	0.141755	-2.77207	3.21456	0.00130644	0.0185978	yes
XLOC_025559	Tmem158	chr9:123168174-123169907	CR_Ileum	CR_Colon	OK	1.68867	0.243139	-2.79604	3.57367	0.000352015	0.00627505	yes
XLOC_005821	Gcnt2	chr13:40955490-41056261	CR_Ileum	CR_Colon	OK	14.4605	2.08033	-2.79723	5.49943	3.81021e-08	1.8696e-06	yes
XLOC_025430	Glyctk	chr9:106055190-106062456	CR_Ileum	CR_Colon	OK	4.85468	0.69827	-2.79752	4.53969	5.63383e-06	0.000171666	yes
XLOC_016451	Il22ra1	chr4:135283779-135311383	CR_Ileum	CR_Colon	OK	44.7687	6.39483	-2.80751	6.63552	3.2337e-11	2.61297e-09	yes
XLOC_009722	Glp1r	chr17:31038811-31077818	CR_Ileum	CR_Colon	OK	0.319755	0.0456129	-2.80945	3.09056	0.00199779	0.0263428	yes
XLOC_008202	Plec	chr15:76001403-76061808	CR_Ileum	CR_Colon	OK	0.632374	0.0898823	-2.81467	3.60558	0.000311452	0.00566332	yes
XLOC_011660	Slc1a1	chr19:28909581-29045854	CR_Ileum	CR_Colon	OK	88.5382	12.5611	-2.81733	5.10668	3.27877e-07	1.32518e-05	yes
XLOC_018852	Adap1	chr5:139747829-139801685	CR_Ileum	CR_Colon	OK	109.687	15.516	-2.82156	6.47604	9.41613e-11	7.06866e-09	yes
XLOC_000922	Gpr55	chr1:87834825-87857660	CR_Ileum	CR_Colon	OK	1.9428	0.274586	-2.82281	3.68725	0.000226689	0.00433121	yes
XLOC_015082	Cfi	chr3:129539656-129578246	CR_Ileum	CR_Colon	OK	0.650511	0.0918345	-2.82447	2.90385	0.00368601	0.0429083	yes
XLOC_002824	Upp1	chr11:9018010-9036173	CR_Ileum	CR_Colon	OK	171.737	24.2022	-2.82699	5.84051	5.20417e-09	2.99174e-07	yes
XLOC_012985	Sord	chr2:122060574-122091073	CR_Ileum	CR_Colon	OK	272.514	38.2585	-2.83248	6.071	1.27115e-09	8.03534e-08	yes
XLOC_013562	Stom	chr2:35169509-35192529	CR_Ileum	CR_Colon	OK	61.6618	8.64556	-2.83435	6.94794	3.70659e-12	3.42919e-10	yes
XLOC_025043	Barx2	chr9:31653628-31720870	CR_Ileum	CR_Colon	OK	7.45289	1.04485	-2.83451	5.05337	4.34091e-07	1.71758e-05	yes
XLOC_014233	Mafb	chr2:160189412-160192801	CR_Ileum	CR_Colon	OK	21.6436	3.03225	-2.83548	6.74818	1.49716e-11	1.26643e-09	yes
XLOC_015117	Tspan5	chr3:138396440-138567525	CR_Ileum	CR_Colon	OK	22.4722	3.09692	-2.85924	6.04574	1.48726e-09	9.30872e-08	yes
XLOC_014602	-	chr2:180091467-180096976	CR_Ileum	CR_Colon	OK	0.277257	0.0381473	-2.86157	2.98217	0.0028621	0.0350784	yes
XLOC_022785	-	chr7:91300763-91304361	CR_Ileum	CR_Colon	OK	2.41922	0.332555	-2.86287	4.6263	3.72254e-06	0.000118789	yes
XLOC_003716	-	chr11:20717370-20721810	CR_Ileum	CR_Colon	OK	0.356852	0.0488358	-2.86931	3.0428	0.00234388	0.0299792	yes
XLOC_019430	-	chr6:70672556-70676954	CR_Ileum	CR_Colon	OK	11.589	1.57933	-2.87538	3.02469	0.00248885	0.0314764	yes
XLOC_011372	Ankrd29	chr18:12410865-12464246	CR_Ileum	CR_Colon	OK	1.14019	0.155197	-2.8771	3.40011	0.000673583	0.0108454	yes
XLOC_014369	Ptk6	chr2:180926566-180937772	CR_Ileum	CR_Colon	OK	23.2136	3.15745	-2.87814	5.4758	4.3554e-08	2.11284e-06	yes
XLOC_009203	Upk1b	chr16:38771607-38800316	CR_Ileum	CR_Colon	OK	5.34502	0.725675	-2.8808	4.02802	5.6249e-05	0.00129894	yes
XLOC_025358	Me1	chr9:86474969-86589947	CR_Ileum	CR_Colon	OK	19.939	2.70631	-2.88119	4.71042	2.47211e-06	8.23288e-05	yes
XLOC_002331	Lrrc3	chr10:77360319-77365281	CR_Ileum	CR_Colon	OK	0.576624	0.0780422	-2.8853	3.57341	0.000352364	0.00628024	yes
XLOC_017397	-	chr4:43809909-43809970	CR_Ileum	CR_Colon	OK	144239	19445.8	-2.89093	3.98111	6.85941e-05	0.00154336	yes
XLOC_006508	Parp8	chr13:117643630-117814323	CR_Ileum	CR_Colon	OK	0.614213	0.0827305	-2.89225	3.19964	0.00137602	0.0194179	yes
XLOC_003496	Acbd4	chr11:102963001-102973719	CR_Ileum	CR_Colon	OK	61.2309	8.22032	-2.89699	5.37808	7.52863e-08	3.46527e-06	yes
XLOC_007793	Gpr172b	chr15:76366151-76379795	CR_Ileum	CR_Colon	OK	57.2875	7.67452	-2.90007	4.6719	2.98425e-06	9.73555e-05	yes
XLOC_000790	Gls	chr1:52220289-52290076	CR_Ileum	CR_Colon	OK	148.239	19.7798	-2.90583	4.85631	1.19594e-06	4.28485e-05	yes
XLOC_002110	Iyd	chr10:6791663-6806262	CR_Ileum	CR_Colon	OK	23.159	3.08504	-2.90821	6.09004	1.12884e-09	7.18483e-08	yes
XLOC_005268	Egln3	chr12:55279967-55304861	CR_Ileum	CR_Colon	OK	60.109	7.98735	-2.91179	4.13462	3.55535e-05	0.000871614	yes
XLOC_011147	B4galt6	chr18:20843099-20907149	CR_Ileum	CR_Colon	OK	39.6602	5.22592	-2.92394	5.3351	9.54911e-08	4.31041e-06	yes
XLOC_002234	Prdm1	chr10:44156980-44178493	CR_Ileum	CR_Colon	OK	2.41856	0.31851	-2.92474	3.30073	0.000964322	0.0145352	yes
XLOC_020087	Cml2	chr6:85815415-85819131	CR_Ileum	CR_Colon	OK	0.98684	0.129718	-2.92744	3.90777	9.31518e-05	0.00201009	yes
XLOC_001302	C130074G19Rik	chr1:186695804-186706915	CR_Ileum	CR_Colon	OK	78.3474	10.2954	-2.92788	6.83142	8.40772e-12	7.36151e-10	yes
XLOC_001561	Gm5177	chr10:10325742-10336111	CR_Ileum	CR_Colon	OK	1.31697	0.17216	-2.9354	4.07824	4.53781e-05	0.00107864	yes
XLOC_011671	Il33	chr19:29999603-30035205	CR_Ileum	CR_Colon	OK	1.65266	0.21585	-2.93668	2.96087	0.00306776	0.0370652	yes
XLOC_019408	Abcg2	chr6:58546665-58642682	CR_Ileum	CR_Colon	OK	167.024	21.7771	-2.93917	5.70875	1.13811e-08	6.1721e-07	yes
XLOC_003704	Cobl	chr11:12130284-12364988	CR_Ileum	CR_Colon	OK	71.3044	9.28153	-2.94156	5.67099	1.41975e-08	7.54834e-07	yes
XLOC_004317	Vat1	chr11:101309725-101327544	CR_Ileum	CR_Colon	OK	76.2278	9.84986	-2.95214	5.26499	1.40195e-07	6.12665e-06	yes
XLOC_018707	Dtx1	chr5:121130272-121161678	CR_Ileum	CR_Colon	OK	1.03055	0.132733	-2.95682	3.93279	8.39648e-05	0.00183737	yes
XLOC_009989	Epb4.1l3	chr17:69424962-69639386	CR_Ileum	CR_Colon	OK	98.6931	12.6216	-2.96706	5.52809	3.2373e-08	1.6127e-06	yes
XLOC_022464	Sox6	chr7:122614383-123182258	CR_Ileum	CR_Colon	OK	6.05943	0.767393	-2.98114	6.15182	7.66002e-10	5.00891e-08	yes
XLOC_012170	-	chr19:53007924-53022002	CR_Ileum	CR_Colon	OK	0.74466	0.0939908	-2.98599	3.96948	7.2031e-05	0.00160953	yes
XLOC_003657	Tcn2	chr11:3817080-3832081	CR_Ileum	CR_Colon	OK	355.528	44.7341	-2.99051	4.76003	1.93566e-06	6.61391e-05	yes
XLOC_025574	-	chr9:7751673-7751761	CR_Ileum	CR_Colon	OK	68754	8647.87	-2.99103	5.46067	4.7433e-08	2.28405e-06	yes
XLOC_010364	Gm11127	chr17:36179905-36203205	CR_Ileum	CR_Colon	OK	57.5455	7.21291	-2.99605	5.37345	7.72425e-08	3.5487e-06	yes
XLOC_001172	Prrx1	chr1:165175249-165243781	CR_Ileum	CR_Colon	OK	0.388994	0.048644	-2.99941	2.84788	0.0044011	0.0492827	yes
XLOC_014898	Tchh	chr3:93246251-93252999	CR_Ileum	CR_Colon	OK	1.22026	0.152503	-3.00027	4.50554	6.62041e-06	0.000198034	yes
XLOC_013496	Vav2	chr2:27117506-27283072	CR_Ileum	CR_Colon	OK	23.5214	2.93709	-3.00152	6.96919	3.18767e-12	2.97138e-10	yes
XLOC_009767	H2-DMb2	chr17:34282360-34288040	CR_Ileum	CR_Colon	OK	3.75862	0.467356	-3.00761	3.39866	0.000677163	0.0108912	yes
XLOC_010213	Rab11fip3	chr17:26125975-26206451	CR_Ileum	CR_Colon	OK	46.69	5.8008	-3.00879	6.57357	4.91223e-11	3.87623e-09	yes
XLOC_002511	Ptprr	chr10:115455418-115711991	CR_Ileum	CR_Colon	OK	5.89817	0.732664	-3.00904	3.34982	0.000808632	0.0125892	yes
XLOC_012914	Lpcat4	chr2:112079997-112087268	CR_Ileum	CR_Colon	OK	53.386	6.62073	-3.0114	6.98253	2.89924e-12	2.72194e-10	yes
XLOC_025786	Otc	chrX:9829401-9899467	CR_Ileum	CR_Colon	OK	59.3124	7.3407	-3.01434	6.87394	6.245e-12	5.57784e-10	yes
XLOC_020468	-	chr6:59281755-59289888	CR_Ileum	CR_Colon	OK	0.319238	0.0394971	-3.01481	3.71673	0.000201817	0.00392169	yes
XLOC_000201	Vil1	chr1:74449292-74634802	CR_Ileum	CR_Colon	OK	1218.92	149.658	-3.02586	3.06257	0.00219449	0.0284484	yes
XLOC_004090	Ksr1	chr11:78826934-78961554	CR_Ileum	CR_Colon	OK	26.2273	3.20177	-3.03413	5.77745	7.58422e-09	4.24355e-07	yes
XLOC_008226	Apol7a	chr15:77218646-77241510	CR_Ileum	CR_Colon	OK	56.4743	6.88505	-3.03606	3.80376	0.000142516	0.00291121	yes
XLOC_001321	Mfsd7b	chr1:192829710-192853660	CR_Ileum	CR_Colon	OK	19.1322	2.3297	-3.03779	6.17263	6.71636e-10	4.41264e-08	yes
XLOC_017323	Espn	chr4:151489607-151526470	CR_Ileum	CR_Colon	OK	153.474	18.6072	-3.04406	5.69866	1.20749e-08	6.50866e-07	yes
XLOC_022649	Slc25a22	chr7:148615646-148623773	CR_Ileum	CR_Colon	OK	107.568	12.8957	-3.06029	6.57295	4.93277e-11	3.89105e-09	yes
XLOC_016506	Epha2	chr4:140857135-140885300	CR_Ileum	CR_Colon	OK	39.4976	4.70503	-3.06949	6.55794	5.45559e-11	4.28066e-09	yes
XLOC_010381	Trim15	chr17:36997621-37004155	CR_Ileum	CR_Colon	OK	34.3898	4.07292	-3.07785	6.04147	1.52718e-09	9.54511e-08	yes
XLOC_011858	Rhod,Syt12	chr19:4425417-4477613	CR_Ileum	CR_Colon	OK	52.9994	6.25454	-3.083	5.57796	2.43359e-08	1.24099e-06	yes
XLOC_009780	-	chr17:34690141-34692007	CR_Ileum	CR_Colon	OK	0.847268	0.0999737	-3.0832	3.02309	0.00250208	0.0316047	yes
XLOC_001318	Prox1	chr1:191941920-191994593	CR_Ileum	CR_Colon	OK	1.01605	0.11938	-3.08934	4.87997	1.06103e-06	3.8493e-05	yes
XLOC_002677	-	chr10:45595826-45595896	CR_Ileum	CR_Colon	OK	22928.8	2673.92	-3.10013	3.6055	0.000311548	0.00566461	yes
XLOC_019896	-	chr6:39204319-39220683	CR_Ileum	CR_Colon	OK	0.652014	0.0755539	-3.10933	4.40497	1.058e-05	0.000298809	yes
XLOC_011380	-	chr18:21260866-21263727	CR_Ileum	CR_Colon	OK	0.750275	0.0862112	-3.12147	3.70286	0.000213179	0.00410913	yes
XLOC_008308	Cyp2d26	chr15:82620441-82624874	CR_Ileum	CR_Colon	OK	140.042	16.0437	-3.12578	6.60394	4.00384e-11	3.1992e-09	yes
XLOC_012098	Sorbs1	chr19:40366361-40588318	CR_Ileum	CR_Colon	OK	3.24511	0.370316	-3.13144	3.34471	0.000823696	0.0127807	yes
XLOC_003155	Pld2	chr11:70353578-70371614	CR_Ileum	CR_Colon	OK	5.33071	0.607847	-3.13255	4.82851	1.37558e-06	4.86247e-05	yes
XLOC_016796	AI427809	chr4:53274227-53283139	CR_Ileum	CR_Colon	OK	11.6496	1.32654	-3.13455	5.16397	2.41772e-07	1.0029e-05	yes
XLOC_005662	-	chr13:6109955-6147283	CR_Ileum	CR_Colon	OK	0.61866	0.0701046	-3.14157	2.87155	0.00408458	0.0465026	yes
XLOC_014774	Serpini1	chr3:75361454-75446445	CR_Ileum	CR_Colon	OK	0.667123	0.0754599	-3.14417	3.36561	0.000763733	0.0120276	yes
XLOC_010908	Vaultrc5	chr18:36961416-36961761	CR_Ileum	CR_Colon	OK	9.29524	1.05053	-3.14538	2.92246	0.00347275	0.040893	yes
XLOC_004189	Nxph3	chr11:95371159-95375879	CR_Ileum	CR_Colon	OK	0.478455	0.0540172	-3.14689	2.96898	0.00298789	0.0363176	yes
XLOC_023014	Zmat4	chr8:24780132-25173577	CR_Ileum	CR_Colon	OK	1.02459	0.115533	-3.14867	2.87112	0.00409022	0.04655	yes
XLOC_011086	Pstpip2	chr18:78033288-78121618	CR_Ileum	CR_Colon	OK	58.9738	6.62429	-3.15424	7.62853	2.37588e-14	3.02093e-12	yes
XLOC_001817	Palm	chr10:79256316-79283651	CR_Ileum	CR_Colon	OK	8.35714	0.93655	-3.15758	4.9913	5.99729e-07	2.30481e-05	yes
XLOC_012020	Pcsk5	chr19:17504800-17912256	CR_Ileum	CR_Colon	OK	33.4678	3.74687	-3.15902	6.47691	9.36176e-11	7.03021e-09	yes
XLOC_007229	Olfr741	chr14:51085707-51106070	CR_Ileum	CR_Colon	OK	266.64	29.6601	-3.1683	4.41425	1.01359e-05	0.000288172	yes
XLOC_002214	Slc16a10	chr10:39753340-39862060	CR_Ileum	CR_Colon	OK	40.5277	4.47199	-3.17992	6.04196	1.52253e-09	9.51877e-08	yes
XLOC_016785	Baat	chr4:49501316-49524100	CR_Ileum	CR_Colon	OK	5.67166	0.620806	-3.19156	3.70534	0.00021111	0.00407384	yes
XLOC_010314	Btnl6	chr17:34637753-34655726	CR_Ileum	CR_Colon	OK	259.234	28.3737	-3.19163	4.68076	2.8581e-06	9.36943e-05	yes
XLOC_020406	Dennd5b	chr6:148936500-149052941	CR_Ileum	CR_Colon	OK	9.45593	1.03435	-3.1925	6.65825	2.77098e-11	2.26358e-09	yes
XLOC_012637	Gpd2	chr2:57090088-57223130	CR_Ileum	CR_Colon	OK	57.4054	6.25568	-3.19795	6.70732	1.98233e-11	1.65043e-09	yes
XLOC_012948	Gchfr	chr2:118993523-118998125	CR_Ileum	CR_Colon	OK	38.7991	4.19492	-3.20931	6.06321	1.33431e-09	8.42264e-08	yes
XLOC_000988	Rnf152	chr1:107173493-107253287	CR_Ileum	CR_Colon	OK	24.9356	2.69553	-3.20956	7.68993	1.46549e-14	1.92736e-12	yes
XLOC_010569	Xdh	chr17:74233247-74299522	CR_Ileum	CR_Colon	OK	112.397	12.1324	-3.21167	6.11269	9.79638e-10	6.28925e-08	yes
XLOC_025289	Plekho2	chr9:65401872-65427841	CR_Ileum	CR_Colon	OK	2.29499	0.247384	-3.21367	4.92329	8.50999e-07	3.15687e-05	yes
XLOC_001841	Reep6	chr10:79792889-79799186	CR_Ileum	CR_Colon	OK	106.958	11.5133	-3.21567	7.6821	1.55431e-14	2.03694e-12	yes
XLOC_007925	Tmem117	chr15:94459615-94926528	CR_Ileum	CR_Colon	OK	107.066	11.5056	-3.2181	4.85315	1.21517e-06	4.34664e-05	yes
XLOC_016584	Hes2	chr4:151532962-151536591	CR_Ileum	CR_Colon	OK	12.0739	1.29721	-3.21841	5.7922	6.94691e-09	3.91855e-07	yes
XLOC_019540	Slc41a3	chr6:90554731-90599436	CR_Ileum	CR_Colon	OK	8.83785	0.945359	-3.22476	5.03341	4.81824e-07	1.88662e-05	yes
XLOC_018409	Slc2a9	chr5:38740511-38893391	CR_Ileum	CR_Colon	OK	16.5669	1.77017	-3.22634	5.86127	4.59332e-09	2.65847e-07	yes
XLOC_015339	Tmem144	chr3:79602980-79656174	CR_Ileum	CR_Colon	OK	23.0005	2.45723	-3.22656	5.18412	2.17032e-07	9.10643e-06	yes
XLOC_001367	-	chr1:45914541-45914683	CR_Ileum	CR_Colon	OK	118.597	12.6644	-3.22721	3.1293	0.00175222	0.0237157	yes
XLOC_015384	Rhbg	chr3:88046795-88058661	CR_Ileum	CR_Colon	OK	23.4189	2.49527	-3.23041	5.92579	3.10808e-09	1.85492e-07	yes
XLOC_010426	Mep1a	chr17:43608210-43639722	CR_Ileum	CR_Colon	OK	662.668	70.4593	-3.23342	4.58623	4.51329e-06	0.000141143	yes
XLOC_019377	Prr15	chr6:53989526-54453763	CR_Ileum	CR_Colon	OK	172.52	18.3331	-3.23424	5.55719	2.74151e-08	1.38435e-06	yes
XLOC_006909	Mcpt1	chr14:56636800-56639228	CR_Ileum	CR_Colon	OK	13.2397	1.40684	-3.23434	4.06386	4.82682e-05	0.00113748	yes
XLOC_001034	Daf2	chr1:132285104-132319576	CR_Ileum	CR_Colon	OK	1.2943	0.136563	-3.24453	3.15932	0.00158139	0.0217665	yes
XLOC_013131	2310046K01Rik	chr2:151822246-151834994	CR_Ileum	CR_Colon	OK	142.341	14.9324	-3.25284	6.88137	5.92792e-12	5.31601e-10	yes
XLOC_025117	Gramd1b	chr9:40100801-40273426	CR_Ileum	CR_Colon	OK	25.4676	2.66589	-3.25597	5.92217	3.17718e-09	1.89361e-07	yes
XLOC_007317	Gzmb	chr14:56877694-56881097	CR_Ileum	CR_Colon	OK	14.4756	1.51524	-3.256	4.96841	6.75043e-07	2.56492e-05	yes
XLOC_021075	Pcsk6	chr7:73007021-73195272	CR_Ileum	CR_Colon	OK	0.673072	0.0703744	-3.25764	3.43358	0.000595672	0.00980004	yes
XLOC_006904	Ltb4r1,Ltb4r2	chr14:56379613-56387329	CR_Ileum	CR_Colon	OK	3.56859	0.372778	-3.25897	3.02283	0.0025042	0.0316201	yes
XLOC_018344	Cnpy1	chr5:28527375-28564413	CR_Ileum	CR_Colon	OK	2.73101	0.284439	-3.26324	4.91527	8.86587e-07	3.27412e-05	yes
XLOC_010815	Svil	chr18:4920481-5119291	CR_Ileum	CR_Colon	OK	9.49628	0.986103	-3.26755	4.56262	5.05196e-06	0.000155969	yes
XLOC_022489	Cdr2	chr7:128100548-128125826	CR_Ileum	CR_Colon	OK	19.7758	2.04086	-3.27649	6.11982	9.36831e-10	6.03711e-08	yes
XLOC_009766	H2-DMa	chr17:34269872-34276307	CR_Ileum	CR_Colon	OK	32.7549	3.37819	-3.27739	4.4944	6.97648e-06	0.000207345	yes
XLOC_022644	Sct	chr7:148464227-148465201	CR_Ileum	CR_Colon	OK	120.027	12.3347	-3.28256	6.40546	1.49915e-10	1.09578e-08	yes
XLOC_007269	Slc7a7	chr14:54980524-55036536	CR_Ileum	CR_Colon	OK	138.259	14.1904	-3.28439	5.72546	1.03155e-08	5.63273e-07	yes
XLOC_014562	-	chr2:157309380-157310879	CR_Ileum	CR_Colon	OK	0.758527	0.0776456	-3.28822	3.04568	0.00232158	0.0297505	yes
XLOC_009768	H2-DMb1	chr17:34290135-34297174	CR_Ileum	CR_Colon	OK	22.8635	2.33258	-3.29305	5.4679	4.55405e-08	2.20199e-06	yes
XLOC_003558	Slc9a3r1	chr11:115024654-115048701	CR_Ileum	CR_Colon	OK	934.573	95.3125	-3.29357	4.77158	1.82787e-06	6.28037e-05	yes
XLOC_023330	Ces2e	chr8:107450151-107458572	CR_Ileum	CR_Colon	OK	622.816	63.4452	-3.29522	5.31421	1.07121e-07	4.78387e-06	yes
XLOC_018299	Mir5109	chr5:17282566-17282653	CR_Ileum	CR_Colon	OK	4991.12	507.069	-3.29911	2.84274	0.00447282	0.0499022	yes
XLOC_001166	Fmo4	chr1:164721979-164744188	CR_Ileum	CR_Colon	OK	22.609	2.26452	-3.31962	5.31434	1.07046e-07	4.78147e-06	yes
XLOC_014613	Hnf4g	chr3:3508016-3660035	CR_Ileum	CR_Colon	OK	94.9605	9.4463	-3.32951	6.42049	1.35833e-10	9.98108e-09	yes
XLOC_007690	Osr2	chr15:35223622-35233060	CR_Ileum	CR_Colon	OK	97.4801	9.67292	-3.33308	6.4668	1.00098e-10	7.49656e-09	yes
XLOC_000523	Aldh9a1	chr1:169280121-169298661	CR_Ileum	CR_Colon	OK	194.888	19.329	-3.33381	6.91088	4.81659e-12	4.38669e-10	yes
XLOC_017347	Mmp23	chr4:155024763-155028010	CR_Ileum	CR_Colon	OK	1.91198	0.189538	-3.33451	3.08773	0.0020169	0.0265475	yes
XLOC_002367	Adamtsl5	chr10:79802347-79811229	CR_Ileum	CR_Colon	OK	37.13	3.6752	-3.33669	5.23036	1.6918e-07	7.27452e-06	yes
XLOC_026041	Gdpd2	chrX:97925185-97934238	CR_Ileum	CR_Colon	OK	19.979	1.96012	-3.34947	5.97033	2.36781e-09	1.43824e-07	yes
XLOC_003634	Slc16a3	chr11:120809797-120820594	CR_Ileum	CR_Colon	OK	10.8683	1.0574	-3.36154	5.00149	5.68879e-07	2.19652e-05	yes
XLOC_025455	Slc38a3	chr9:107553485-107571299	CR_Ileum	CR_Colon	OK	0.487914	0.0470895	-3.37315	2.93157	0.0033725	0.0399408	yes
XLOC_020206	Ret	chr6:118101765-118147762	CR_Ileum	CR_Colon	OK	1.74835	0.167989	-3.37956	5.38912	7.08049e-08	3.27257e-06	yes
XLOC_019841	Tmem229a	chr6:24901140-24906125	CR_Ileum	CR_Colon	OK	0.918181	0.0876848	-3.38838	4.48651	7.23995e-06	0.000214087	yes
XLOC_007076	Acox2	chr14:9058024-9091783	CR_Ileum	CR_Colon	OK	5.9721	0.569055	-3.3916	5.52694	3.25862e-08	1.6226e-06	yes
XLOC_008181	2010109I03Rik	chr15:74708765-74712134	CR_Ileum	CR_Colon	OK	161.532	15.2196	-3.40782	5.43253	5.55601e-08	2.63879e-06	yes
XLOC_020088	1700019G17Rik	chr6:85849043-85855077	CR_Ileum	CR_Colon	OK	50.3314	4.74137	-3.40808	6.25912	3.87151e-10	2.63313e-08	yes
XLOC_001650	Sesn1	chr10:41530379-41628242	CR_Ileum	CR_Colon	OK	55.6593	5.23656	-3.40993	7.43272	1.06359e-13	1.23695e-11	yes
XLOC_016045	Glipr2	chr4:43970573-43991990	CR_Ileum	CR_Colon	OK	19.5451	1.83522	-3.41278	6.65894	2.75802e-11	2.25401e-09	yes
XLOC_017974	Mn1	chr5:111847185-111886045	CR_Ileum	CR_Colon	OK	0.274717	0.0257602	-3.41473	3.50228	0.000461295	0.00789551	yes
XLOC_005900	Fbxl21	chr13:56623858-56643435	CR_Ileum	CR_Colon	OK	3.23014	0.30188	-3.41955	3.55616	0.000376316	0.00663793	yes
XLOC_014961	Fmo5	chr3:97432726-97459210	CR_Ileum	CR_Colon	OK	67.9344	6.34377	-3.42073	6.80131	1.03675e-11	8.98182e-10	yes
XLOC_021739	Apoc2	chr7:20256927-20262213	CR_Ileum	CR_Colon	OK	58.9404	5.48105	-3.42673	6.61309	3.76374e-11	3.01821e-09	yes
XLOC_022244	Myo7a	chr7:105198421-105268060	CR_Ileum	CR_Colon	OK	10.3772	0.964734	-3.42715	7.38878	1.48104e-13	1.69231e-11	yes
XLOC_023997	-	chr8:125232161-125242786	CR_Ileum	CR_Colon	OK	0.574029	0.0532452	-3.4304	3.38031	0.000724033	0.0115134	yes
XLOC_017624	Hgf	chr5:16059367-16125257	CR_Ileum	CR_Colon	OK	0.283483	0.0262913	-3.4306	2.87701	0.00401459	0.0458939	yes
XLOC_026527	Gyk	chrX:82945566-83022257	CR_Ileum	CR_Colon	OK	105.619	9.79122	-3.43123	4.12378	3.72701e-05	0.000907568	yes
XLOC_025385	Pls1	chr9:95652700-95745698	CR_Ileum	CR_Colon	OK	438.789	40.6671	-3.43159	4.83653	1.32128e-06	4.68772e-05	yes
XLOC_005136	Tnfaip2	chr12:112680871-112693229	CR_Ileum	CR_Colon	OK	0.728647	0.0672532	-3.43755	3.68539	0.000228352	0.00435875	yes
XLOC_000842	Plekhm3	chr1:64835694-65003398	CR_Ileum	CR_Colon	OK	1.82572	0.167992	-3.442	5.91037	3.41339e-09	2.02192e-07	yes
XLOC_008416	Rhebl1	chr15:98708190-98711845	CR_Ileum	CR_Colon	OK	13.3328	1.22529	-3.44378	4.3494	1.36512e-05	0.000374274	yes
XLOC_024560	Sema7a	chr9:57787941-57810672	CR_Ileum	CR_Colon	OK	11.0928	1.01841	-3.44524	6.88155	5.9206e-12	5.31158e-10	yes
XLOC_001035	Cd55	chr1:132320313-132359324	CR_Ileum	CR_Colon	OK	82.2054	7.533	-3.44794	3.56916	0.000358129	0.00636972	yes
XLOC_025678	-	chr9:98423775-98428898	CR_Ileum	CR_Colon	OK	0.43951	0.0397567	-3.46663	3.86173	0.000112585	0.00237205	yes
XLOC_019352	Abp1	chr6:48845253-48859186	CR_Ileum	CR_Colon	OK	712.636	64.2222	-3.47202	4.13503	3.54906e-05	0.000870343	yes
XLOC_025677	-	chr9:98414628-98419594	CR_Ileum	CR_Colon	OK	0.490055	0.0440971	-3.47419	4.04981	5.12593e-05	0.00119856	yes
XLOC_010665	-	chr17:15711164-15713115	CR_Ileum	CR_Colon	OK	1.28915	0.115785	-3.47691	3.95335	7.70636e-05	0.0017067	yes
XLOC_014228	Tgm2	chr2:157942140-157972128	CR_Ileum	CR_Colon	OK	32.5613	2.91719	-3.48051	8.18138	2.22045e-16	3.57154e-14	yes
XLOC_016428	Map3k6	chr4:132792862-132808845	CR_Ileum	CR_Colon	OK	20.2935	1.81314	-3.48446	6.37794	1.79488e-10	1.29616e-08	yes
XLOC_015869	-	chr3:107891072-107895222	CR_Ileum	CR_Colon	OK	0.321402	0.0286297	-3.48879	3.27489	0.00105704	0.0156774	yes
XLOC_014563	-	chr2:157311027-157312329	CR_Ileum	CR_Colon	OK	1.37559	0.122416	-3.49018	3.66411	0.0002482	0.0046699	yes
XLOC_004160	-	chr11:89719624-89746013	CR_Ileum	CR_Colon	OK	1.90225	0.168154	-3.49985	3.44775	0.000565267	0.0093795	yes
XLOC_003483	Nags	chr11:102006004-102011428	CR_Ileum	CR_Colon	OK	38.2796	3.35988	-3.5101	6.33878	2.3159e-10	1.63416e-08	yes
XLOC_003432	Igfbp4	chr11:98902573-98913970	CR_Ileum	CR_Colon	OK	14.0128	1.22275	-3.51854	5.31615	1.05984e-07	4.73689e-06	yes
XLOC_017763	Lap3	chr5:45884612-45903930	CR_Ileum	CR_Colon	OK	243.075	21.1867	-3.52017	7.69982	1.35447e-14	1.79303e-12	yes
XLOC_023579	Slc25a15	chr8:23485967-23509093	CR_Ileum	CR_Colon	OK	77.208	6.71819	-3.52261	7.45164	9.21485e-14	1.07902e-11	yes
XLOC_017690	Khk	chr5:31223902-31233856	CR_Ileum	CR_Colon	OK	169.525	14.7188	-3.52576	7.24101	4.45421e-13	4.7386e-11	yes
XLOC_016787	Aldob	chr4:49548866-49562419	CR_Ileum	CR_Colon	OK	743.419	64.4717	-3.52744	5.49517	3.90344e-08	1.90943e-06	yes
XLOC_007213	1700011H14Rik	chr14:49842190-49865103	CR_Ileum	CR_Colon	OK	19.9982	1.73158	-3.52971	6.4789	9.23916e-11	6.94284e-09	yes
XLOC_011803	Acsl5	chr19:55322453-55372403	CR_Ileum	CR_Colon	OK	328.654	28.2011	-3.54275	4.99414	5.90992e-07	2.27644e-05	yes
XLOC_000317	Gal3st2	chr1:95757920-95773071	CR_Ileum	CR_Colon	OK	155.045	13.2544	-3.54814	7.91829	2.44249e-15	3.54842e-13	yes
XLOC_022228	Prss23	chr7:96656294-96667090	CR_Ileum	CR_Colon	OK	74.5144	6.35239	-3.55215	7.30583	2.75557e-13	3.03169e-11	yes
XLOC_024787	Gnat1	chr9:107576804-107582073	CR_Ileum	CR_Colon	OK	1.43293	0.122146	-3.55229	3.69484	0.000220026	0.00421987	yes
XLOC_013324	Edn3	chr2:174585769-174609543	CR_Ileum	CR_Colon	OK	23.7829	2.00864	-3.56563	6.35269	2.11587e-10	1.50786e-08	yes
XLOC_019695	Clec2h	chr6:128612402-128628686	CR_Ileum	CR_Colon	OK	1120.29	94.4673	-3.56791	4.02115	5.79142e-05	0.00133436	yes
XLOC_012341	Bend7	chr2:4638868-4723221	CR_Ileum	CR_Colon	OK	20.3075	1.70911	-3.5707	6.64226	3.08906e-11	2.50521e-09	yes
XLOC_024923	Ccr9	chr9:123676328-123692575	CR_Ileum	CR_Colon	OK	0.667233	0.0561044	-3.572	4.05146	5.09001e-05	0.00119204	yes
XLOC_016986	Cyp4b1	chr4:115254642-115320360	CR_Ileum	CR_Colon	OK	70.4187	5.77807	-3.6073	6.50239	7.90539e-11	6.02206e-09	yes
XLOC_017930	Lrrc8b	chr5:105844735-105927339	CR_Ileum	CR_Colon	OK	20.6909	1.69478	-3.60983	7.20762	5.69322e-13	5.95406e-11	yes
XLOC_012171	Xpnpep1	chr19:53065621-53113149	CR_Ileum	CR_Colon	OK	271.741	22.0841	-3.62115	7.07733	1.46949e-12	1.44115e-10	yes
XLOC_000370	AA986860	chr1:132628552-132660945	CR_Ileum	CR_Colon	OK	80.9531	6.52384	-3.63329	7.19564	6.21725e-13	6.46253e-11	yes
XLOC_014561	-	chr2:157305832-157309284	CR_Ileum	CR_Colon	OK	0.361698	0.0290876	-3.63631	3.38654	0.000707809	0.011295	yes
XLOC_003990	Cxcl16	chr11:70267357-70279701	CR_Ileum	CR_Colon	OK	14.9314	1.19794	-3.63973	5.59068	2.26188e-08	1.1625e-06	yes
XLOC_019138	-	chr5:146025311-146028231	CR_Ileum	CR_Colon	OK	0.332212	0.0264359	-3.65154	3.09686	0.00195582	0.0258863	yes
XLOC_026557	P2ry4	chrX:97782777-97790265	CR_Ileum	CR_Colon	OK	6.25349	0.494927	-3.65938	6.77401	1.25262e-11	1.07059e-09	yes
XLOC_022667	Igf2	chr7:149836672-149856261	CR_Ileum	CR_Colon	OK	2.36523	0.186967	-3.66113	4.04156	5.30967e-05	0.00123592	yes
XLOC_010282	Cyp4f14	chr17:33031225-33084337	CR_Ileum	CR_Colon	OK	59.4253	4.64428	-3.67755	4.16274	3.14452e-05	0.000784121	yes
XLOC_000900	Scg2	chr1:79431243-79436724	CR_Ileum	CR_Colon	OK	3.16217	0.241094	-3.71325	5.3444	9.07182e-08	4.10916e-06	yes
XLOC_020177	Cidec	chr6:113374605-113385749	CR_Ileum	CR_Colon	OK	19.1098	1.45501	-3.71521	6.56561	5.18188e-11	4.07598e-09	yes
XLOC_003474	Rnd2	chr11:101329651-101333165	CR_Ileum	CR_Colon	OK	23.8713	1.80012	-3.72911	5.19052	2.09704e-07	8.82899e-06	yes
XLOC_015702	Clca6	chr3:144615449-144645561	CR_Ileum	CR_Colon	OK	323.526	24.2605	-3.7372	5.97692	2.27396e-09	1.38791e-07	yes
XLOC_006338	Fbp1	chr13:62961615-62989596	CR_Ileum	CR_Colon	OK	14.1103	1.05741	-3.73813	5.39184	6.97383e-08	3.23066e-06	yes
XLOC_000711	Tram2	chr1:20986383-21069306	CR_Ileum	CR_Colon	OK	5.04129	0.372849	-3.75713	7.1597	8.08464e-13	8.26438e-11	yes
XLOC_008127	Anxa13	chr15:58168370-58220829	CR_Ileum	CR_Colon	OK	193.839	14.2868	-3.76211	8.28695	2.22045e-16	3.57154e-14	yes
XLOC_023575	Atp7b	chr8:23103249-23182229	CR_Ileum	CR_Colon	OK	3.02828	0.223057	-3.76302	3.57868	0.000345338	0.00617686	yes
XLOC_012300	-	chr19:53051258-53055132	CR_Ileum	CR_Colon	OK	1.3753	0.101128	-3.7655	5.14034	2.74236e-07	1.12662e-05	yes
XLOC_025785	Sytl5	chrX:9460505-9582355	CR_Ileum	CR_Colon	OK	0.772859	0.0566619	-3.76976	4.21833	2.46118e-05	0.000632773	yes
XLOC_023004	Tpte	chr8:23393912-23485438	CR_Ileum	CR_Colon	OK	1.39139	0.101875	-3.77166	5.77272	7.80024e-09	4.34908e-07	yes
XLOC_003478	Arl4d	chr11:101526854-101529146	CR_Ileum	CR_Colon	OK	17.7604	1.30032	-3.77172	6.93584	4.03833e-12	3.71906e-10	yes
XLOC_020947	Ceacam18	chr7:50890036-50906248	CR_Ileum	CR_Colon	OK	40.593	2.97021	-3.77259	7.13205	9.88765e-13	9.94725e-11	yes
XLOC_000019	Xkr9	chr1:13658809-13697046	CR_Ileum	CR_Colon	OK	18.2477	1.33216	-3.77588	5.70928	1.13457e-08	6.15442e-07	yes
XLOC_014997	Ptpn22	chr3:103636618-103716170	CR_Ileum	CR_Colon	OK	5.72836	0.410793	-3.80164	3.54612	0.000390954	0.0068591	yes
XLOC_010664	-	chr17:15709819-15711069	CR_Ileum	CR_Colon	OK	1.22134	0.0872721	-3.80681	3.56295	0.000366716	0.00649749	yes
XLOC_000088	Il18r1	chr1:40522396-40557743	CR_Ileum	CR_Colon	OK	1.89687	0.133572	-3.82793	2.95482	0.00312848	0.0376392	yes
XLOC_013327	Gm14306,Gm14436	chr2:175295525-175308823	CR_Ileum	CR_Colon	OK	1.58733	0.111676	-3.82922	5.3878	7.13259e-08	3.29459e-06	yes
XLOC_014781	Pdgfc	chr3:80840221-81017984	CR_Ileum	CR_Colon	OK	8.2854	0.58219	-3.83101	5.38961	7.06108e-08	3.26496e-06	yes
XLOC_008212	Dgat1	chr15:76307806-76342408	CR_Ileum	CR_Colon	OK	328.89	23.0744	-3.83324	5.90729	3.47789e-09	2.05464e-07	yes
XLOC_006910	Mcpt2	chr14:56660959-56663471	CR_Ileum	CR_Colon	OK	6.92494	0.480108	-3.85037	4.38357	1.16752e-05	0.000325929	yes
XLOC_023412	Bcmo1	chr8:119619764-119657620	CR_Ileum	CR_Colon	OK	8.24269	0.568632	-3.85755	6.70664	1.99152e-11	1.65738e-09	yes
XLOC_011166	Gpr17	chr18:32091160-32118273	CR_Ileum	CR_Colon	OK	1.979	0.136445	-3.85838	4.91185	9.02199e-07	3.32514e-05	yes
XLOC_010865	-	chr18:30674433-30703451	CR_Ileum	CR_Colon	OK	4.76786	0.326897	-3.86643	3.94991	7.81801e-05	0.00172712	yes
XLOC_021904	Aplp1	chr7:31219998-31232006	CR_Ileum	CR_Colon	OK	98.2845	6.68717	-3.8775	8.19205	2.22045e-16	3.57154e-14	yes
XLOC_001936	-	chr10:94578991-94593253	CR_Ileum	CR_Colon	OK	0.551024	0.0374236	-3.8801	3.51316	0.000442818	0.00762449	yes
XLOC_025288	Ostb	chr9:65246294-65271844	CR_Ileum	CR_Colon	OK	670.165	45.2828	-3.88748	6.2894	3.18706e-10	2.19449e-08	yes
XLOC_018558	-	chr5:97338384-97341247	CR_Ileum	CR_Colon	OK	0.74142	0.0495465	-3.90344	3.72055	0.000198792	0.00387146	yes
XLOC_014006	Tgm5	chr2:120871846-120911495	CR_Ileum	CR_Colon	OK	0.703207	0.0467805	-3.90997	3.71358	0.000204348	0.00396401	yes
XLOC_021751	2210010C17Rik	chr7:20521307-20536143	CR_Ileum	CR_Colon	OK	74.8585	4.96766	-3.91353	7.65197	1.9762e-14	2.55366e-12	yes
XLOC_017337	2810405K02Rik	chr4:154269743-154273377	CR_Ileum	CR_Colon	OK	202.633	13.2162	-3.93849	8.40569	0	0	yes
XLOC_017916	Agpat9	chr5:101269683-101328121	CR_Ileum	CR_Colon	OK	50.2064	3.2666	-3.94201	8.38732	0	0	yes
XLOC_007889	Fam118a	chr15:84867491-84893268	CR_Ileum	CR_Colon	OK	38.7521	2.51841	-3.94369	7.14978	8.69083e-13	8.82313e-11	yes
XLOC_002040	Rdh9	chr10:127213405-127229753	CR_Ileum	CR_Colon	OK	62.3659	4.01381	-3.95771	7.97066	1.55431e-15	2.32656e-13	yes
XLOC_002171	Enpp3	chr10:24492891-24556001	CR_Ileum	CR_Colon	OK	4.61272	0.293071	-3.9763	4.92558	8.41115e-07	3.12595e-05	yes
XLOC_003551	Ttyh2	chr11:114536781-114582298	CR_Ileum	CR_Colon	OK	39.9517	2.53391	-3.97882	9.16513	0	0	yes
XLOC_007402	Bmp1	chr14:70874361-70920554	CR_Ileum	CR_Colon	OK	20.534	1.3022	-3.97899	5.79127	6.9855e-09	3.93632e-07	yes
XLOC_007792	Hsf1	chr15:76307806-76342408	CR_Ileum	CR_Colon	OK	20.0067	1.26131	-3.98749	3.83202	0.000127096	0.00263701	yes
XLOC_017309	Spsb1	chr4:149270388-149329115	CR_Ileum	CR_Colon	OK	9.54446	0.5995	-3.99283	6.86288	6.74838e-12	5.9985e-10	yes
XLOC_005661	-	chr13:6076163-6109804	CR_Ileum	CR_Colon	OK	2.96728	0.185019	-4.00339	5.10786	3.25822e-07	1.31783e-05	yes
XLOC_010369	Gm7030	chr17:36261094-36266414	CR_Ileum	CR_Colon	OK	14.3177	0.88534	-4.01543	6.58852	4.44234e-11	3.53178e-09	yes
XLOC_011568	Vwce	chr19:10708722-10740799	CR_Ileum	CR_Colon	OK	1.38301	0.084419	-4.03409	5.0877	3.62429e-07	1.45293e-05	yes
XLOC_006782	Arhgap22	chr14:34030008-34183122	CR_Ileum	CR_Colon	OK	0.600865	0.0363853	-4.04561	3.17316	0.00150791	0.0209319	yes
XLOC_013531	Fam78a	chr2:31922385-31940393	CR_Ileum	CR_Colon	OK	12.0542	0.729929	-4.04564	7.20211	5.92859e-13	6.18565e-11	yes
XLOC_017713	Slc5a1	chr5:33446867-33508961	CR_Ileum	CR_Colon	OK	625.847	37.8256	-4.04837	4.07208	4.65956e-05	0.00110333	yes
XLOC_010367	-	chr17:36248181-36248642	CR_Ileum	CR_Colon	OK	11.7761	0.710725	-4.05043	3.84594	0.000120091	0.0025102	yes
XLOC_023841	Ces1c	chr8:95622914-95655182	CR_Ileum	CR_Colon	OK	1.6536	0.0990568	-4.06121	3.32893	0.000871801	0.0133915	yes
XLOC_004121	Gm11437	chr11:83957190-83981026	CR_Ileum	CR_Colon	OK	15.2622	0.912115	-4.06461	4.64177	3.45433e-06	0.0001109	yes
XLOC_022149	Slco3a1	chr7:81420303-81699666	CR_Ileum	CR_Colon	OK	4.01213	0.239337	-4.06725	4.65418	3.25265e-06	0.000105108	yes
XLOC_005522	-	chr12:8530351-8533139	CR_Ileum	CR_Colon	OK	0.670854	0.0399792	-4.06868	3.97851	6.93483e-05	0.00155757	yes
XLOC_006426	Bhmt	chr13:94386845-94407713	CR_Ileum	CR_Colon	OK	0.635402	0.0378025	-4.07112	3.5313	0.000413516	0.00718682	yes
XLOC_022441	Nrip3	chr7:116901569-116925059	CR_Ileum	CR_Colon	OK	0.791964	0.0469806	-4.0753	4.55499	5.23871e-06	0.000161107	yes
XLOC_010843	Dsg4	chr18:20594675-20631696	CR_Ileum	CR_Colon	OK	0.548916	0.0323427	-4.08508	3.88645	0.000101722	0.00217286	yes
XLOC_005232	Slc26a4	chr12:32204683-32244834	CR_Ileum	CR_Colon	OK	0.438625	0.0257438	-4.09069	3.59399	0.000325656	0.00588355	yes
XLOC_000931	Alppl2	chr1:88983265-88986503	CR_Ileum	CR_Colon	OK	1.42035	0.0833055	-4.09169	4.48279	7.36745e-06	0.000217393	yes
XLOC_012278	-	chr19:38459771-38461674	CR_Ileum	CR_Colon	OK	0.910656	0.0533839	-4.09243	3.67917	0.000233996	0.00444444	yes
XLOC_009506	Sytl3	chr17:6877959-6942393	CR_Ileum	CR_Colon	OK	5.96879	0.349858	-4.0926	4.30428	1.67533e-05	0.000448526	yes
XLOC_014780	Fam198b	chr3:79680871-79750200	CR_Ileum	CR_Colon	OK	1.08736	0.0637071	-4.09324	3.48394	0.000494084	0.00836392	yes
XLOC_012515	Slc27a4	chr2:29658199-29673042	CR_Ileum	CR_Colon	OK	302.434	17.6932	-4.09535	7.28043	3.32845e-13	3.62072e-11	yes
XLOC_002271	Hkdc1	chr10:61845790-61885205	CR_Ileum	CR_Colon	OK	136.419	7.95633	-4.0998	7.57344	3.64153e-14	4.48142e-12	yes
XLOC_003659	Sec14l2	chr11:3997009-4018780	CR_Ileum	CR_Colon	OK	22.4559	1.30585	-4.10403	7.25724	3.95017e-13	4.24302e-11	yes
XLOC_012162	-	chr19:47225478-47232351	CR_Ileum	CR_Colon	OK	0.692113	0.0400512	-4.11109	3.20526	0.0013494	0.0190956	yes
XLOC_019047	-	chr5:91480305-91482877	CR_Ileum	CR_Colon	OK	0.695752	0.0400653	-4.11815	3.78206	0.000155538	0.00313792	yes
XLOC_007278	Slc7a8	chr14:55341029-55400771	CR_Ileum	CR_Colon	OK	41.4773	2.35882	-4.13619	7.92934	2.22045e-15	3.24493e-13	yes
XLOC_001701	-	chr10:58884864-58909193	CR_Ileum	CR_Colon	OK	0.439757	0.0248433	-4.14578	3.07203	0.00212608	0.0277144	yes
XLOC_011505	Slc25a45	chr19:5878465-5885768	CR_Ileum	CR_Colon	OK	27.4941	1.53783	-4.16015	8.06417	6.66134e-16	1.02828e-13	yes
XLOC_016463	Htr1d	chr4:135979438-136000494	CR_Ileum	CR_Colon	OK	0.616695	0.0344152	-4.16344	3.23742	0.00120615	0.0174248	yes
XLOC_015049	Dpyd	chr3:118265069-119135837	CR_Ileum	CR_Colon	OK	83.7605	4.64481	-4.17258	8.82266	0	0	yes
XLOC_012190	Hspa12a	chr19:58870239-58935531	CR_Ileum	CR_Colon	OK	11.2715	0.622433	-4.17862	7.01335	2.32681e-12	2.20126e-10	yes
XLOC_024716	Plod2	chr9:92433638-92503265	CR_Ileum	CR_Colon	OK	1.21738	0.0668596	-4.1865	4.18372	2.86775e-05	0.000723142	yes
XLOC_007960	Gpd1	chr15:99548023-99555438	CR_Ileum	CR_Colon	OK	182.147	9.97842	-4.19015	9.09748	0	0	yes
XLOC_002253	Oit3	chr10:58884864-58909193	CR_Ileum	CR_Colon	OK	0.848883	0.0464527	-4.19173	4.07002	4.70083e-05	0.0011118	yes
XLOC_006498	Gzma	chr13:113884034-113891189	CR_Ileum	CR_Colon	OK	44.565	2.42408	-4.2004	6.22437	4.83505e-10	3.25065e-08	yes
XLOC_013663	Gpr155	chr2:73179563-73224534	CR_Ileum	CR_Colon	OK	2.88053	0.15618	-4.20505	4.45788	8.27724e-06	0.000240911	yes
XLOC_012282	-	chr19:41343677-41346091	CR_Ileum	CR_Colon	OK	1.06	0.0570255	-4.21631	4.21316	2.51825e-05	0.000645101	yes
XLOC_019829	Fam3c	chr6:22255734-22306351	CR_Ileum	CR_Colon	OK	34.0858	1.8279	-4.22091	8.10297	4.44089e-16	6.97145e-14	yes
XLOC_002303	AI646023	chr10:75012869-75023075	CR_Ileum	CR_Colon	OK	1.92523	0.102268	-4.2346	5.51983	3.3932e-08	1.68132e-06	yes
XLOC_002520	Lyz2	chr10:116714596-116719328	CR_Ileum	CR_Colon	OK	12.8034	0.677917	-4.23927	6.69787	2.11486e-11	1.75552e-09	yes
XLOC_003271	Adap2	chr11:79967542-79994122	CR_Ileum	CR_Colon	OK	12.7416	0.664126	-4.26195	7.84687	4.21885e-15	5.96143e-13	yes
XLOC_010851	Mep1b	chr18:21230844-21258705	CR_Ileum	CR_Colon	OK	721.321	37.4748	-4.26665	5.88994	3.86345e-09	2.2633e-07	yes
XLOC_010365	H2-Bl	chr17:36217133-36221194	CR_Ileum	CR_Colon	OK	36.7451	1.89374	-4.27824	6.60679	3.92739e-11	3.13924e-09	yes
XLOC_015059	Fabp2	chr3:122591562-122602424	CR_Ileum	CR_Colon	OK	7406.22	380.073	-4.28439	3.87537	0.000106463	0.00226024	yes
XLOC_006204	1300014I06Rik	chr13:34719709-34744966	CR_Ileum	CR_Colon	OK	14.5201	0.738937	-4.29646	6.65023	2.92646e-11	2.38291e-09	yes
XLOC_017048	Foxo6	chr4:119939682-119960343	CR_Ileum	CR_Colon	OK	12.2122	0.615165	-4.31121	5.33143	9.74404e-08	4.39304e-06	yes
XLOC_019139	-	chr5:146830079-146924859	CR_Ileum	CR_Colon	OK	0.312025	0.0156476	-4.31765	3.32499	0.000884216	0.0135494	yes
XLOC_004932	Arg2	chr12:80231774-80273606	CR_Ileum	CR_Colon	OK	68.8606	3.41717	-4.33281	4.62945	3.66629e-06	0.000117213	yes
XLOC_012073	2010002M12Rik	chr19:34691540-34724540	CR_Ileum	CR_Colon	OK	40.8854	2.02804	-4.33342	5.54237	2.984e-08	1.4993e-06	yes
XLOC_018033	Lhx5	chr5:120881894-120891466	CR_Ileum	CR_Colon	OK	0.308801	0.01521	-4.34359	3.0086	0.00262452	0.0327815	yes
XLOC_011824	Pnliprp2	chr19:58834212-58852024	CR_Ileum	CR_Colon	OK	48.6399	2.39032	-4.34687	7.76928	7.99361e-15	1.08801e-12	yes
XLOC_007177	Ldb3	chr14:35339868-35401893	CR_Ileum	CR_Colon	OK	9.59636	0.469404	-4.35358	5.36703	8.00439e-08	3.67132e-06	yes
XLOC_022648	Cend1	chr7:148612349-148615319	CR_Ileum	CR_Colon	OK	1.24798	0.0601363	-4.37521	4.05482	5.01725e-05	0.00117723	yes
XLOC_007245	Rnase1	chr14:51751556-51766442	CR_Ileum	CR_Colon	OK	6.17782	0.296437	-4.3813	4.15436	3.26197e-05	0.000810173	yes
XLOC_011959	Dak	chr19:10666686-10679929	CR_Ileum	CR_Colon	OK	145.209	6.93003	-4.38913	9.09026	0	0	yes
XLOC_012027	Gda	chr19:21465796-21547151	CR_Ileum	CR_Colon	OK	126.173	6.01	-4.39189	7.82274	5.10703e-15	7.12134e-13	yes
XLOC_021040	Tmem86a	chr7:54299053-54310152	CR_Ileum	CR_Colon	OK	36.9222	1.74453	-4.40358	7.3232	2.42029e-13	2.68676e-11	yes
XLOC_019475	Slc4a5	chr6:83157607-83254939	CR_Ileum	CR_Colon	OK	0.863294	0.0403603	-4.41884	4.83633	1.32256e-06	4.69076e-05	yes
XLOC_004698	-	chr11:102003157-102004739	CR_Ileum	CR_Colon	OK	0.785524	0.0365574	-4.42542	3.41998	0.000626255	0.0102099	yes
XLOC_006004	Gcnt4	chr13:97694643-97720869	CR_Ileum	CR_Colon	OK	20.0551	0.930787	-4.42938	8.27506	2.22045e-16	3.57154e-14	yes
XLOC_009773	H2-Ab1	chr17:34400171-34406363	CR_Ileum	CR_Colon	OK	226.722	10.4883	-4.43406	7.26413	3.75477e-13	4.05076e-11	yes
XLOC_022199	9930013L23Rik	chr7:91081366-91235015	CR_Ileum	CR_Colon	OK	0.439423	0.020107	-4.44984	4.57657	4.72672e-06	0.000147052	yes
XLOC_023595	Ido1	chr8:25694599-25707481	CR_Ileum	CR_Colon	OK	30.3191	1.37029	-4.46767	3.19261	0.00140993	0.0198133	yes
XLOC_012852	Chrm4	chr2:91762345-91772439	CR_Ileum	CR_Colon	OK	4.28508	0.192613	-4.47555	5.18343	2.1784e-07	9.12998e-06	yes
XLOC_007479	Slc15a1	chr14:121858842-121904527	CR_Ileum	CR_Colon	OK	290.466	12.8734	-4.4959	7.18565	6.68798e-13	6.90981e-11	yes
XLOC_006274	Gprin1	chr13:54838033-54851030	CR_Ileum	CR_Colon	OK	1.88068	0.0829846	-4.50227	6.33017	2.44896e-10	1.72421e-08	yes
XLOC_007358	Gata4	chr14:63817751-63864116	CR_Ileum	CR_Colon	OK	7.61574	0.330925	-4.52441	7.8341	4.66294e-15	6.5473e-13	yes
XLOC_026637	Nxf7	chrX:132114109-132133233	CR_Ileum	CR_Colon	OK	2.74653	0.1191	-4.52737	4.96616	6.82918e-07	2.58825e-05	yes
XLOC_011012	Cd74	chr18:60963502-60972306	CR_Ileum	CR_Colon	OK	634.725	27.4876	-4.52928	4.82294	1.41457e-06	4.98603e-05	yes
XLOC_004560	-	chr11:44200694-44200763	CR_Ileum	CR_Colon	OK	17511.6	757.721	-4.5305	3.98455	6.76075e-05	0.00152495	yes
XLOC_017222	Nbl1	chr4:138638193-138648885	CR_Ileum	CR_Colon	OK	92.1453	3.96908	-4.53704	8.66516	0	0	yes
XLOC_010326	C2	chr17:34999546-35019045	CR_Ileum	CR_Colon	OK	24.9109	1.06946	-4.54182	8.2665	2.22045e-16	3.57154e-14	yes
XLOC_001446	-	chr1:123239871-123242827	CR_Ileum	CR_Colon	OK	0.357722	0.0153151	-4.54581	3.1327	0.00173208	0.0234961	yes
XLOC_023130	Tm6sf2	chr8:72596618-72604284	CR_Ileum	CR_Colon	OK	216.483	9.25149	-4.54843	9.13728	0	0	yes
XLOC_010036	Slc3a1	chr17:85427668-85489614	CR_Ileum	CR_Colon	OK	168.999	7.03015	-4.58731	6.77723	1.22504e-11	1.04944e-09	yes
XLOC_024034	-	chr8:5035592-5082727	CR_Ileum	CR_Colon	OK	0.329448	0.0136891	-4.58895	3.14741	0.00164726	0.0225063	yes
XLOC_011790	Sorcs3	chr19:48280514-48879995	CR_Ileum	CR_Colon	OK	0.619126	0.0256061	-4.59567	3.75119	0.000175997	0.0034856	yes
XLOC_008116	Sntb1	chr15:55467844-55748595	CR_Ileum	CR_Colon	OK	0.735603	0.0303433	-4.59948	3.17172	0.00151537	0.0210066	yes
XLOC_002341	Syde1	chr10:78047247-78054709	CR_Ileum	CR_Colon	OK	5.92765	0.241151	-4.61945	7.43928	1.01252e-13	1.18064e-11	yes
XLOC_020912	Pepd	chr7:35697425-35829727	CR_Ileum	CR_Colon	OK	438.49	17.8133	-4.62152	8.43654	0	0	yes
XLOC_011121	Abhd3	chr18:10644408-10706834	CR_Ileum	CR_Colon	OK	43.8895	1.78286	-4.62161	9.02944	0	0	yes
XLOC_007926	Ano6	chr15:95618299-95805926	CR_Ileum	CR_Colon	OK	83.4012	3.30869	-4.65574	9.02841	0	0	yes
XLOC_004980	Jdp2	chr12:86938189-86980983	CR_Ileum	CR_Colon	OK	3.54473	0.139431	-4.66806	4.06932	4.71496e-05	0.00111477	yes
XLOC_015140	Lpar3	chr3:145883924-145949178	CR_Ileum	CR_Colon	OK	4.99336	0.196375	-4.66833	5.92124	3.19518e-09	1.90332e-07	yes
XLOC_001842	Plk5	chr10:79819203-79828234	CR_Ileum	CR_Colon	OK	2.54706	0.0994054	-4.67937	5.19806	2.01379e-07	8.514e-06	yes
XLOC_019955	Dfna5	chr6:50157401-50211807	CR_Ileum	CR_Colon	OK	134.616	5.22737	-4.68662	9.8759	0	0	yes
XLOC_025804	Nyx	chrX:13044029-13067677	CR_Ileum	CR_Colon	OK	0.847642	0.0327417	-4.69425	4.87227	1.10322e-06	3.98586e-05	yes
XLOC_007648	Prlr	chr15:10106992-10279706	CR_Ileum	CR_Colon	OK	23.6087	0.9104	-4.69667	8.79603	0	0	yes
XLOC_021957	-	chr7:36251665-36255099	CR_Ileum	CR_Colon	OK	4.26266	0.1634	-4.70528	7.29516	2.98206e-13	3.26309e-11	yes
XLOC_004837	Agmo	chr12:37968113-38312860	CR_Ileum	CR_Colon	OK	43.9513	1.68394	-4.706	8.57607	0	0	yes
XLOC_012988	-	chr2:122208693-122215777	CR_Ileum	CR_Colon	OK	2.31556	0.0886788	-4.70663	6.5303	6.56375e-11	5.06976e-09	yes
XLOC_024728	-	chr9:98419755-98423622	CR_Ileum	CR_Colon	OK	0.533556	0.0201879	-4.72407	3.00988	0.00261351	0.0326661	yes
XLOC_016228	Fam151a	chr4:106406194-106477902	CR_Ileum	CR_Colon	OK	67.335	2.52645	-4.73617	5.90253	3.57967e-09	2.11085e-07	yes
XLOC_002590	Suox	chr10:128106942-128110974	CR_Ileum	CR_Colon	OK	252.76	9.33586	-4.75884	9.34821	0	0	yes
XLOC_009776	Btnl2	chr17:34491727-34507250	CR_Ileum	CR_Colon	OK	53.3211	1.96544	-4.76178	8.51026	0	0	yes
XLOC_011061	Mro	chr18:74019040-74039175	CR_Ileum	CR_Colon	OK	3.04688	0.111048	-4.77808	3.89726	9.72858e-05	0.00208935	yes
XLOC_016512	Agmat	chr4:141302589-141315178	CR_Ileum	CR_Colon	OK	3.59924	0.128815	-4.80432	5.40811	6.36934e-08	2.97733e-06	yes
XLOC_021157	Rab30	chr7:99890223-99987378	CR_Ileum	CR_Colon	OK	3.60651	0.128603	-4.80961	4.17861	2.93291e-05	0.000738221	yes
XLOC_019252	Akr1b7	chr6:34362361-34373137	CR_Ileum	CR_Colon	OK	69.3922	2.47084	-4.8117	9.63104	0	0	yes
XLOC_009578	-	chr17:20211460-20219782	CR_Ileum	CR_Colon	OK	3.81472	0.135537	-4.81482	5.52026	3.38494e-08	1.67797e-06	yes
XLOC_009774	H2-Eb1	chr17:34442811-34453619	CR_Ileum	CR_Colon	OK	98.53	3.45537	-4.83365	5.86561	4.47492e-09	2.59196e-07	yes
XLOC_001559	-	chr10:8623760-8642894	CR_Ileum	CR_Colon	OK	0.567153	0.0198825	-4.83417	2.84438	0.00444982	0.049693	yes
XLOC_018117	Gatsl2	chr5:134575588-134620278	CR_Ileum	CR_Colon	OK	10.2677	0.358104	-4.84159	7.80786	5.77316e-15	7.97511e-13	yes
XLOC_016571	Slc2a5	chr4:149493452-149518277	CR_Ileum	CR_Colon	OK	45.8866	1.59253	-4.84868	8.53867	0	0	yes
XLOC_017504	-	chr4:119333283-119334350	CR_Ileum	CR_Colon	OK	3.03747	0.103544	-4.87455	4.53707	5.70414e-06	0.000173618	yes
XLOC_014245	Ada	chr2:163552319-163575943	CR_Ileum	CR_Colon	OK	83.3537	2.80339	-4.894	8.96066	0	0	yes
XLOC_021595	Tmem86b	chr7:4577751-4582479	CR_Ileum	CR_Colon	OK	53.1	1.74606	-4.92654	7.71397	1.22125e-14	1.62636e-12	yes
XLOC_018918	Slc46a3	chr5:148688913-148706381	CR_Ileum	CR_Colon	OK	48.7861	1.59649	-4.9335	8.9487	0	0	yes
XLOC_017882	Ereg	chr5:91503642-91522675	CR_Ileum	CR_Colon	OK	8.94281	0.285175	-4.97081	8.48242	0	0	yes
XLOC_017503	-	chr4:119332063-119332724	CR_Ileum	CR_Colon	OK	2.69311	0.0857027	-4.97379	3.64698	0.000265342	0.00493605	yes
XLOC_003834	Ankrd43	chr11:53290079-53293697	CR_Ileum	CR_Colon	OK	22.7624	0.721464	-4.97958	9.93009	0	0	yes
XLOC_024727	Rbp2	chr9:98390955-98410190	CR_Ileum	CR_Colon	OK	502.343	15.9189	-4.97986	10.766	0	0	yes
XLOC_001420	-	chr1:95798990-95800535	CR_Ileum	CR_Colon	OK	0.846549	0.0265984	-4.99218	3.32418	0.000886776	0.0135802	yes
XLOC_011035	-	chr18:65011705-65045869	CR_Ileum	CR_Colon	OK	1.6529	0.0518699	-4.99396	3.93871	8.19218e-05	0.00179923	yes
XLOC_011351	Cndp2	chr18:84836860-84855025	CR_Ileum	CR_Colon	OK	767.571	24.0203	-4.99797	8.12716	4.44089e-16	6.97145e-14	yes
XLOC_012989	Slc28a2	chr2:122252212-122353776	CR_Ileum	CR_Colon	OK	39.2887	1.22825	-4.99944	6.31911	2.63082e-10	1.84059e-08	yes
XLOC_012736	-	chr2:84355830-84372144	CR_Ileum	CR_Colon	OK	0.580085	0.0180733	-5.00433	4.22162	2.42556e-05	0.000624831	yes
XLOC_019456	Reg1	chr6:78373640-78378660	CR_Ileum	CR_Colon	OK	5.81019	0.180349	-5.00972	4.40923	1.03737e-05	0.000293917	yes
XLOC_022473	Itpripl2	chr7:125628625-125635489	CR_Ileum	CR_Colon	OK	16.7263	0.516968	-5.0159	10.1688	0	0	yes
XLOC_011285	-	chr18:64346817-64351713	CR_Ileum	CR_Colon	OK	0.551081	0.0169005	-5.02713	3.5383	0.000402716	0.00703047	yes
XLOC_000861	Mreg	chr1:72205806-72258881	CR_Ileum	CR_Colon	OK	6.21037	0.190412	-5.02748	7.56608	3.84137e-14	4.71169e-12	yes
XLOC_023515	Slc10a2	chr8:5083134-5105897	CR_Ileum	CR_Colon	OK	316.822	9.54554	-5.0527	6.35954	2.02353e-10	1.4467e-08	yes
XLOC_010371	Gm8909	chr17:36278687-36346052	CR_Ileum	CR_Colon	OK	97.4805	2.91991	-5.06112	4.11339	3.89897e-05	0.000943958	yes
XLOC_019012	-	chr5:53492033-53494663	CR_Ileum	CR_Colon	OK	0.418744	0.0122026	-5.10081	3.05447	0.00225461	0.0290649	yes
XLOC_026507	Mpp1	chrX:72341192-72376561	CR_Ileum	CR_Colon	OK	296.977	8.59158	-5.11128	8.52389	0	0	yes
XLOC_004396	Abca8b	chr11:109793539-109857130	CR_Ileum	CR_Colon	OK	0.820644	0.0233126	-5.13757	3.76464	0.000166787	0.00332962	yes
XLOC_001884	-	chr10:81977533-82048166	CR_Ileum	CR_Colon	OK	16.599	0.470956	-5.13936	5.05346	4.33869e-07	1.71732e-05	yes
XLOC_010833	Ttc39c	chr18:12801911-12897902	CR_Ileum	CR_Colon	OK	13.9188	0.379413	-5.19713	8.04289	8.88178e-16	1.36157e-13	yes
XLOC_007198	Ptgdr	chr14:45470909-45479050	CR_Ileum	CR_Colon	OK	0.439789	0.0119412	-5.20279	3.38914	0.000701119	0.0112156	yes
XLOC_018406	Msx1	chr5:38211729-38215824	CR_Ileum	CR_Colon	OK	0.771149	0.0206946	-5.21968	3.17258	0.00151091	0.0209618	yes
XLOC_010310	H2-Aa	chr17:34419695-34424716	CR_Ileum	CR_Colon	OK	201.075	5.36715	-5.22744	8.22551	2.22045e-16	3.57154e-14	yes
XLOC_000932	Alpi	chr1:88994573-88998214	CR_Ileum	CR_Colon	OK	350.292	9.34837	-5.2277	9.38569	0	0	yes
XLOC_013627	Dpp4	chr2:61884571-62250614	CR_Ileum	CR_Colon	OK	291.748	7.69296	-5.24504	5.40794	6.37525e-08	2.97912e-06	yes
XLOC_020562	-	chr6:149514425-149517030	CR_Ileum	CR_Colon	OK	0.658994	0.0171831	-5.2612	3.85219	0.000117065	0.00245411	yes
XLOC_011332	Slc14a1	chr18:78296829-78338858	CR_Ileum	CR_Colon	OK	0.847189	0.0217337	-5.28468	4.39248	1.12067e-05	0.000314431	yes
XLOC_001026	Nckap5	chr1:127810110-128727209	CR_Ileum	CR_Colon	OK	3.83485	0.0971009	-5.30354	5.46088	4.73772e-08	2.28186e-06	yes
XLOC_011967	Ms4a10	chr19:11036725-11049250	CR_Ileum	CR_Colon	OK	72.3322	1.82619	-5.30773	5.89955	3.64486e-09	2.14701e-07	yes
XLOC_007994	Soat2	chr15:101980732-101993867	CR_Ileum	CR_Colon	OK	82.9846	2.08363	-5.31567	8.29519	0	0	yes
XLOC_015700	Gm6289	chr3:144542288-144558975	CR_Ileum	CR_Colon	OK	2.60013	0.0648045	-5.32634	3.49754	0.000469579	0.00801445	yes
XLOC_000318	-	chr1:95786657-95796583	CR_Ileum	CR_Colon	OK	1.10737	0.0270117	-5.35741	3.10505	0.00190248	0.025313	yes
XLOC_003232	Tmigd1	chr11:76715505-76730088	CR_Ileum	CR_Colon	OK	991.292	24.1291	-5.36046	7.81616	5.55112e-15	7.6971e-13	yes
XLOC_012156	Cyp17a1	chr19:46741654-46747490	CR_Ileum	CR_Colon	OK	0.54261	0.0130867	-5.37375	2.91442	0.00356347	0.04174	yes
XLOC_023469	-	chr8:126155138-126169004	CR_Ileum	CR_Colon	OK	2.61765	0.0620141	-5.39953	3.85426	0.000116078	0.00243573	yes
XLOC_020845	9530053A07Rik	chr7:28914484-28949830	CR_Ileum	CR_Colon	OK	17.1683	0.406606	-5.39997	10.6905	0	0	yes
XLOC_014029	Bambi-ps1,Slc28a2	chr2:122252212-122353776	CR_Ileum	CR_Colon	OK	4.85631	0.114078	-5.41176	3.24221	0.00118605	0.0171903	yes
[truncated: 177 more rows]

## Sheet: GO.BP.ileum.up
Table S2: GO Biological Process annotations for genes with higher expression in ileal IECs
Category	Term	Count	%	PValue	Genes	List Total	Pop Hits	Pop Total	Fold Enrichment	Bonferroni	Benjamini	FDR
GOTERM_BP_FAT	GO:0019751~polyol metabolic process	16	0.134976	1.53613e-08	GPD2, MOGAT2, GPD1, SORD, DAK, PPIP5K2, GDPD5, PTEN, GDPD1, GDPD2, GOT1, DGAT2, PLCG2, GYK, ITPK1, IPMK	827	43	13588	6.11366	4.29033e-05	4.29033e-05	2.74405e-05
GOTERM_BP_FAT	GO:0046942~carboxylic acid transport	24	0.202463	1.81883e-08	SLC38A3, SLC7A15, SLC25A4, SLC6A20A, SLC7A8, SLC3A2, XK, SLC7A9, SLC6A18, SLC10A2, SLC6A19, SLC7A7, SLCO2A1, SLC26A6, SLC25A22, SLC6A6, SLC22A4, SLC22A5, SLC1A1, CLN8, SLC27A2, CROT, SLC43A2, SLC27A4	827	99	13588	3.98314	5.07986e-05	2.53996e-05	3.24904e-05
GOTERM_BP_FAT	GO:0015849~organic acid transport	24	0.202463	2.22868e-08	SLC38A3, SLC7A15, SLC25A4, SLC6A20A, SLC7A8, SLC3A2, XK, SLC7A9, SLC6A18, SLC10A2, SLC6A19, SLC7A7, SLCO2A1, SLC26A6, SLC25A22, SLC6A6, SLC22A4, SLC22A5, SLC1A1, CLN8, SLC27A2, CROT, SLC43A2, SLC27A4	827	100	13588	3.94331	6.22452e-05	2.07488e-05	3.98118e-05
GOTERM_BP_FAT	GO:0019400~alditol metabolic process	11	0.0927957	9.23539e-07	GPD2, MOGAT2, GPD1, GOT1, SORD, DGAT2, DAK, GDPD5, GYK, GDPD1, GDPD2	827	25	13588	7.22941	0.00257612	0.000644654	0.00164974
GOTERM_BP_FAT	GO:0006952~defense response	54	0.455542	2.30092e-06	ALS2, TOLLIP, TBK1, B2M, APOA4, REG3B, REG3A, NLRC4, TICAM1, VNN1, CFI, REG3G, NOS2, GM15308, DAF2, CIITA, PLD1, DEFB37, DEFA5, DEFA26, H2-AA, KDM6B, TNFAIP8L2, DEFA24, DEFA22, DEFA21, DEFA20, CCL5, CD74, TNFRSF1A, CCL25, GM14851, SERPINA1B, C2, CLEC2H, FN1, B4GALT1, IL18R1, LYZ2, BMP2, PNLIPRP2, LYZ1, LIPA, IL1RL1, CFB, HCK, EPHX2, IDO1, H2-Q8, DDX58, CD55, AY761184, STAB1, GM15284, APAF1, IGFBP4	827	448	13588	1.98046	0.00640586	0.00128447	0.00411013
GOTERM_BP_FAT	GO:0006796~phosphate metabolic process	87	0.733929	3.5059e-06	CDK18, NUAK2, TBK1, LPAR3, PINK1, CASK, RORC, PTPN22, PTPN21, PRKG2, LATS1, PTEN, MAP3K6, APP, PDPK1, CSNK2A1, HSF1, SIK1, IPMK, PTPRJ, IRAK2, SGK1, RET, BCR, TNIK, SGK2, ROCK1, SGK3, PTPRG, MADD, PTPRH, PIM1, PKN2, PTPRR, RPS6KC1, WNK2, PRKCE, TPTE, MTMR11, MAP4K4, MAPK6, CAMK4, MAPK4, PPM1H, HIPK2, BMP2K, TESK2, CDK11B, INPP4A, KSR1, KALRN, FRK, STK10, STK17B, PPM1A, TRIB3, CD74, SBK1, DUSP14, …	827	866	13588	1.65064	0.0097442	0.00163067	0.00626252
GOTERM_BP_FAT	GO:0006793~phosphorus metabolic process	87	0.733929	3.5059e-06	CDK18, NUAK2, TBK1, LPAR3, PINK1, CASK, RORC, PTPN22, PTPN21, PRKG2, LATS1, PTEN, MAP3K6, APP, PDPK1, CSNK2A1, HSF1, SIK1, IPMK, PTPRJ, IRAK2, SGK1, RET, BCR, TNIK, SGK2, ROCK1, SGK3, PTPRG, MADD, PTPRH, PIM1, PKN2, PTPRR, RPS6KC1, WNK2, PRKCE, TPTE, MTMR11, MAP4K4, MAPK6, CAMK4, MAPK4, PPM1H, HIPK2, BMP2K, TESK2, CDK11B, INPP4A, KSR1, KALRN, FRK, STK10, STK17B, PPM1A, TRIB3, CD74, SBK1, DUSP14, …	827	866	13588	1.65064	0.0097442	0.00163067	0.00626252
GOTERM_BP_FAT	GO:0006071~glycerol metabolic process	10	0.0843597	4.08902e-06	GPD2, MOGAT2, GPD1, GOT1, DGAT2, DAK, GDPD5, GYK, GDPD1, GDPD2	827	23	13588	7.14368	0.0113557	0.00163019	0.00730411
GOTERM_BP_FAT	GO:0006865~amino acid transport	17	0.143412	4.09516e-06	SLC38A3, SLC7A15, SLC25A4, SLC6A20A, SLC3A2, SLC7A8, SLC7A9, XK, SLC6A18, SLC6A19, SLC7A7, SLC25A22, SLC6A6, SLC22A4, SLC22A5, CLN8, SLC43A2	827	71	13588	3.93406	0.0113726	0.0014287	0.00731508
GOTERM_BP_FAT	GO:0015837~amine transport	19	0.160283	8.79359e-06	SLC38A3, SLC7A15, SLC25A4, SLC6A20A, SLC6A4, SLC3A2, SLC7A8, XK, SLC7A9, SLC6A18, SLC6A19, SLC7A7, SLC25A22, SLC6A6, SLC22A4, SLC22A3, SLC22A5, CLN8, SLC43A2	827	92	13588	3.39325	0.0242615	0.00272524	0.0157071
GOTERM_BP_FAT	GO:0055114~oxidation reduction	70	0.590518	1.12073e-05	ACOX2, SC5D, EHHADH, PTGS1, RDH9, FAR2, RDH7, PLOD2, GPX4, MICAL1, NOS2, CAT, GFOD1, DHCR24, CYP3A44, SUOX, CYP1A1, CYP3A13, CYP3A11, VAT1, ALDH3B1, SCCPDH, CYP27A1, ALDH1B1, SQLE, CYP4F40, CYP2D26, ALDH9A1, SRXN1, KDM6B, PRODH, CYP2U1, HSD17B11, XDH, ME1, BCMO1, ALDH18A1, SORD, CYP3A25, ME2, EGLN3, ALDH3A2, PIPOX, FMO4, ALDH1A1, FMO5, HSD17B6, ALDH1A7, HSD17B4, HSD17B7, GLRX, ADH6A, GPD2, CHDH, …	827	672	13588	1.71151	0.0308174	0.00312533	0.0200181
GOTERM_BP_FAT	GO:0007242~intracellular signaling cascade	86	0.725494	4.8507e-05	ALS2, PLEKHM3, ADCY8, GNA11, LPAR3, PINK1, IQGAP2, RHOV, LATS1, RHOU, ARHGAP5, DAB1, TIAM2, NOS2, RHOD, AGAP1, RAPGEF2, SIK1, RHOF, PAG1, IRAK2, RAP2B, DEPDC7, RET, BCR, RAP2C, TNIK, SOCS2, ROCK1, SOCS3, MADD, RXRA, SOCS1, ADIPOR2, SOCS4, SYNJ2BP, SLC9A3R1, PRKCE, RND2, ARHGAP31, MAP4K4, CHRM4, RASGRF2, GNB1, RAB17, HIPK2, ARL8A, KSR1, ARL4D, EPS8L2, RALGPS1, STK17B, RTKN, ARF6, NR3C1, CD74, PLEK…	827	915	13588	1.54428	0.126706	0.0122411	0.0866142
GOTERM_BP_FAT	GO:0006468~protein amino acid phosphorylation	65	0.548338	5.28838e-05	CDK18, NUAK2, TBK1, LPAR3, PINK1, RORC, CASK, PRKG2, LATS1, MAP3K6, APP, PDPK1, CSNK2A1, HSF1, SIK1, IRAK2, SGK1, RET, BCR, SGK2, TNIK, SGK3, ROCK1, MADD, PIM1, PKN2, RPS6KC1, WNK2, PRKCE, MAP4K4, MAPK6, CAMK4, MAPK4, HIPK2, BMP2K, TESK2, CDK11B, KSR1, KALRN, FRK, STK10, STK17B, TRIB3, CD74, SBK1, MAP3K2, PTK6, MAP3K1, CAMK2D, LMTK2, PDK2, PTPRE, RYK, HCK, MAP2K4, HGF, EPHA1, EPHA2, GLYCTK, PLK5,…	827	640	13588	1.66872	0.137317	0.0122336	0.0944261
GOTERM_BP_FAT	GO:0016042~lipid catabolic process	22	0.185591	5.63114e-05	ACOX2, PLD2, PLD1, ENPP7, PNLIPRP2, LIPA, PLB1, EHHADH, PLBD1, APOC2, DDHD2, DDHD1, SMPDL3B, FAAH, PLA2G12B, APOC3, PLCG2, PLCD1, PAFAH1B1, HSD17B4, SLC27A2, SLC27A4	827	134	13588	2.69754	0.145537	0.0120257	0.100543
GOTERM_BP_FAT	GO:0019637~organophosphate metabolic process	26	0.219335	6.2352e-05	CHKA, CDIPT, ENPP7, SGMS2, SGPP1, EPT1, PTEN, SMPDL3B, AGPAT9, PCYT1A, PTDSS1, PPAP2B, IPMK, AGPAT2, GPD2, GPD1, PLD1, LPGAT1, CDS1, LPCAT3, LPCAT4, SAMD8, LRAT, PLCG2, GYK, CLN8	827	176	13588	2.42723	0.159833	0.0123626	0.111323
GOTERM_BP_FAT	GO:0009617~response to bacterium	24	0.202463	7.49276e-05	DEFA24, DEFA22, DEFA21, TBK1, DEFA20, NFKBIA, B2M, CD47, TNFRSF1A, NLRC4, HSF1, TICAM1, NOS2, GM15308, LYZ2, PLD1, LYZ1, DEFB37, HCK, IDO1, STAB1, DEFA5, PLCG2, DEFA26, GM15284	827	157	13588	2.51166	0.188833	0.0138552	0.133761
GOTERM_BP_FAT	GO:0006869~lipid transport	20	0.168719	9.71273e-05	SPNS3, OSBPL6, APOC2, ABCA1, GLTP, SLCO2A1, MTTP, ABCG8, APOA4, ABCG5, APOC3, OSBPL10, NPC1L1, OSBPL11, APOL9B, APOL7A, SCP2, SLC27A2, CROT, SLC27A4	827	119	13588	2.76142	0.237604	0.0168127	0.17336
GOTERM_BP_FAT	GO:0018904~organic ether metabolic process	12	0.101232	0.000111108	MOGAT2, DGAT1, DGAT2, INSIG2, CYP1A1, DGKD, APOC3, AGPAT9, SLC22A4, CAT, CDS1, MTTP	827	48	13588	4.10762	0.266804	0.0180898	0.19829
GOTERM_BP_FAT	GO:0048584~positive regulation of response to stimulus	26	0.219335	0.000153913	TBK1, BCAR1, NFKBIA, PTPN22, PNP, ADA, B2M, TNFRSF1A, CD47, TICAM1, TGM2, C2, CFI, SCG2, DAF2, CFB, IDO1, H2-Q8, CD55, EREG, TNFSF13B, HIPK2, PLCG2, H2-AA, JAK2, H2-DMA	827	186	13588	2.29673	0.349433	0.023601	0.274583
GOTERM_BP_FAT	GO:0048002~antigen processing and presentation of peptide antigen	10	0.0843597	0.000182512	GM8909, H2-EB1, H2-AA, H2-DMB1, H2-AB1, H2-DMA, CD74, H2-Q8, H2-DMB2, B2M	827	35	13588	4.69442	0.399386	0.026475	0.325527
GOTERM_BP_FAT	GO:0006639~acylglycerol metabolic process	11	0.0927957	0.000199303	MOGAT2, DGAT1, DGAT2, INSIG2, DGKD, APOC3, AGPAT9, SLC22A4, CAT, CDS1, MTTP	827	43	13588	4.20314	0.426908	0.0274516	0.355424
GOTERM_BP_FAT	GO:0002495~antigen processing and presentation of peptide antigen via MHC class II	7	0.0590518	0.00023413	H2-EB1, H2-AA, H2-DMB1, H2-AB1, H2-DMA, CD74, H2-DMB2	827	16	13588	7.18833	0.480039	0.030663	0.41741
GOTERM_BP_FAT	GO:0019886~antigen processing and presentation of exogenous peptide antigen via MHC class II	7	0.0590518	0.00023413	H2-EB1, H2-AA, H2-DMB1, H2-AB1, H2-DMA, CD74, H2-DMB2	827	16	13588	7.18833	0.480039	0.030663	0.41741
GOTERM_BP_FAT	GO:0010876~lipid localization	20	0.168719	0.000259266	SPNS3, OSBPL6, APOC2, ABCA1, GLTP, SLCO2A1, MTTP, ABCG8, APOA4, ABCG5, APOC3, OSBPL10, NPC1L1, OSBPL11, APOL9B, APOL7A, SCP2, SLC27A2, CROT, SLC27A4	827	128	13588	2.56726	0.515299	0.0323833	0.462125
GOTERM_BP_FAT	GO:0016310~phosphorylation	68	0.573646	0.000273545	CDK18, NUAK2, TBK1, LPAR3, PINK1, RORC, CASK, PRKG2, LATS1, MAP3K6, APP, PDPK1, CSNK2A1, HSF1, SIK1, IPMK, IRAK2, SGK1, RET, BCR, SGK2, TNIK, ROCK1, SGK3, MADD, PIM1, PKN2, RPS6KC1, WNK2, PRKCE, MAP4K4, MAPK6, CAMK4, MAPK4, HIPK2, BMP2K, TESK2, CDK11B, KSR1, KALRN, FRK, STK10, STK17B, TRIB3, CD74, SBK1, MAP3K2, PTK6, MAP3K1, CAMK2D, LMTK2, PDK2, PTPRE, RYK, HCK, MAP2K4, HGF, EPHA1, EPHA2, GLYCTK,…	827	718	13588	1.55609	0.534255	0.0326766	0.487518
GOTERM_BP_FAT	GO:0006638~neutral lipid metabolic process	11	0.0927957	0.000296927	MOGAT2, DGAT1, DGAT2, INSIG2, DGKD, APOC3, AGPAT9, SLC22A4, CAT, CDS1, MTTP	827	45	13588	4.01634	0.563707	0.0339696	0.529085
GOTERM_BP_FAT	GO:0006662~glycerol ether metabolic process	11	0.0927957	0.000296927	MOGAT2, DGAT1, DGAT2, INSIG2, DGKD, APOC3, AGPAT9, SLC22A4, CAT, CDS1, MTTP	827	45	13588	4.01634	0.563707	0.0339696	0.529085
GOTERM_BP_FAT	GO:0002478~antigen processing and presentation of exogenous peptide antigen	8	0.0674878	0.000310189	H2-EB1, H2-AA, H2-DMB1, H2-AB1, H2-DMA, CD74, H2-DMB2, B2M	827	23	13588	5.71495	0.579577	0.034066	0.552655
GOTERM_BP_FAT	GO:0048008~platelet-derived growth factor receptor signaling pathway	8	0.0674878	0.000310189	PLAT, SGPL1, MYO1E, BCAR1, TIPARP, PDGFC, PTEN, PLEKHA1	827	23	13588	5.71495	0.579577	0.034066	0.552655
GOTERM_BP_FAT	GO:0006644~phospholipid metabolic process	23	0.194027	0.000353168	CHKA, PLD1, CDIPT, ENPP7, SGMS2, LPGAT1, SGPP1, EPT1, CDS1, PTEN, LPCAT3, LPCAT4, SAMD8, LRAT, SMPDL3B, AGPAT9, PLCG2, PCYT1A, PTDSS1, PPAP2B, IPMK, CLN8, AGPAT2	827	163	13588	2.31841	0.627148	0.0372342	0.629002
GOTERM_BP_FAT	GO:0048514~blood vessel morphogenesis	26	0.219335	0.000408618	TIPARP, PRRX1, ENPEP, CX3CL1, PTEN, SHB, ARHGAP22, BAK1, ITGAV, CCBE1, TGM2, PLCD1, NOS2, SCG2, PITX2, B4GALT1, PTPRJ, SGPL1, MYO1E, PROX1, EPHA2, ATP7A, EREG, ZMIZ1, HBEGF, TNFAIP2	827	198	13588	2.15754	0.680661	0.0413967	0.727419
GOTERM_BP_FAT	GO:0001568~blood vessel development	30	0.253079	0.000411192	TIPARP, PRRX1, ENPEP, CX3CL1, PTEN, BAK1, ARHGAP22, SHB, ITGAV, CCBE1, TGM2, PLCD1, NOS2, PPAP2B, PITX2, SCG2, B4GALT1, PTPRJ, SGPL1, TBX3, SOCS3, MYO1E, SPINT1, PROX1, EPHA2, ATP7A, EREG, ZMIZ1, HBEGF, TNFAIP2	827	244	13588	2.02014	0.68295	0.0401947	0.731985
GOTERM_BP_FAT	GO:0050778~positive regulation of immune response	20	0.168719	0.000566168	TBK1, CFB, BCAR1, NFKBIA, PTPN22, IDO1, PNP, ADA, H2-Q8, B2M, CD55, EREG, TNFSF13B, TICAM1, PLCG2, H2-AA, CFI, C2, H2-DMA, DAF2	827	136	13588	2.41625	0.794386	0.0530825	1.00655
GOTERM_BP_FAT	GO:0008610~lipid biosynthetic process	33	0.278387	0.000580513	HSD17B11, PRKAG3, CHKA, SC5D, CDIPT, SGMS2, PTGS1, EPT1, CD74, RDH9, ALDH1A1, ELOVL1, FAR2, INSIG2, AGPAT9, PCYT1A, B4GALT6, PTDSS1, HSD17B7, AGPAT2, DHCR24, MOGAT2, PLD1, LPGAT1, UGCG, CDS1, LPCAT3, LPCAT4, SAMD8, CYP17A1, DGAT1, DGAT2, LTA4H	827	285	13588	1.90248	0.802466	0.0526261	1.03193
GOTERM_BP_FAT	GO:0055085~transmembrane transport	47	0.396491	0.000589999	SLC39A14, MFSD9, SLC16A10, SLC5A1, RHBG, SLC7A8, SLC7A9, SFXN1, AQP7, AQP1, SLC47A1, AQP3, SLC7A7, SLC2A7, SLC35B1, TRAM2, SLC2A5, SLC30A1, SLC5A4A, SLC25A22, SLC22A4, SLC30A4, SLC22A3, ABCB10, SLC25A44, SLC22A5, SLC25A45, SLC39A4, SLC43A2, SLC2A9, SPNS3, SLC25A4, TCN2, ABCB7, MCART1, ITPR2, SLC16A3, SLC26A4, ATP7A, ATP6V0E2, SLC13A1, SLC25A37, SLC46A3, SLC25A15, ATP6V0A2, CLCN5, SLC5A12	827	460	13588	1.67877	0.807634	0.0517837	1.04871
GOTERM_BP_FAT	GO:0001944~vasculature development	30	0.253079	0.000613048	TIPARP, PRRX1, ENPEP, CX3CL1, PTEN, BAK1, ARHGAP22, SHB, ITGAV, CCBE1, TGM2, PLCD1, NOS2, PPAP2B, PITX2, SCG2, B4GALT1, PTPRJ, SGPL1, TBX3, SOCS3, MYO1E, SPINT1, PROX1, EPHA2, ATP7A, EREG, ZMIZ1, HBEGF, TNFAIP2	827	250	13588	1.97166	0.819634	0.0521168	1.08947
GOTERM_BP_FAT	GO:0006909~phagocytosis	11	0.0927957	0.00061348	CORO1C, CD47, LRP1, DOCK1, CDC42SE2, ITGAV, HCK, MYO7A, ABCA1, MERTK, ELMO2	827	49	13588	3.68847	0.819852	0.0506129	1.09023
GOTERM_BP_FAT	GO:0002504~antigen processing and presentation of peptide or polysaccharide antigen via MHC class II	7	0.0590518	0.000677752	H2-EB1, H2-AA, H2-DMB1, H2-AB1, H2-DMA, CD74, H2-DMB2	827	19	13588	6.05333	0.849472	0.0541717	1.2038
GOTERM_BP_FAT	GO:0015718~monocarboxylic acid transport	7	0.0590518	0.000677752	SLC26A6, SLC6A6, SLC10A2, SLC27A2, CROT, SLCO2A1, SLC27A4	827	19	13588	6.05333	0.849472	0.0541717	1.2038
GOTERM_BP_FAT	GO:0008202~steroid metabolic process	22	0.185591	0.000752903	HSD17B11, SOAT2, SC5D, CUBN, OSBPL6, NR3C1, ABCA1, RDH9, CYP17A1, BAAT, INSIG2, APOC3, HSD17B6, NPC1L1, OSBPL10, OSBPL11, CAT, CLN8, HSD17B7, NR1H4, DHCR24, FABP6	827	161	13588	2.24516	0.87799	0.0583337	1.33643
GOTERM_BP_FAT	GO:0042742~defense response to bacterium	17	0.143412	0.000791267	DEFA24, PLD1, LYZ2, LYZ1, DEFA22, DEFA21, TBK1, DEFA20, HCK, DEFB37, TNFRSF1A, NLRC4, STAB1, DEFA5, DEFA26, GM15284, NOS2, GM15308	827	108	13588	2.58628	0.890396	0.0595657	1.40408
GOTERM_BP_FAT	GO:0032318~regulation of Ras GTPase activity	14	0.118104	0.00100193	GIT1, ALS2, AGFG1, TBC1D10B, TBC1D9, ASAP1, DGKI, ADAP1, ADAP2, SYDE1, PAFAH1B1, BCL6, TBC1D1, AGAP1	827	80	13588	2.87533	0.939178	0.0728783	1.77475
GOTERM_BP_FAT	GO:0007264~small GTPase mediated signal transduction	30	0.253079	0.00101172	RALGPS1, IQGAP2, RTKN, ARF6, RHOV, RHOU, DAB1, ARHGAP5, RAC2, BCL6, RHOD, AGAP1, RAPGEF2, RHOF, RHEBL1, RAP2B, RAP2C, RAB8B, ROCK1, SYNJ2BP, VAV2, RND2, ARHGAP31, RAB31, RAB30, RASGRF2, RAB17, ARL8A, ARL4D, EPS8L2	827	258	13588	1.91052	0.94082	0.0716991	1.79194
GOTERM_BP_FAT	GO:0006897~endocytosis	24	0.202463	0.00106022	LY75, PLD2, CUBN, HCK, MYO7A, NOSTRIN, SYNJ2BP, ABCA1, ELMO2, APLP1, CORO1C, CD47, AP2A2, APP, LRP1, PICALM, DOCK1, CDC42SE2, LRP12, ITGAV, EHD1, MERTK, DNM1, CLCN5	827	188	13588	2.09751	0.948323	0.0731541	1.87706
GOTERM_BP_FAT	GO:0010324~membrane invagination	24	0.202463	0.00106022	LY75, PLD2, CUBN, HCK, MYO7A, NOSTRIN, SYNJ2BP, ABCA1, ELMO2, APLP1, CORO1C, CD47, AP2A2, APP, LRP1, PICALM, DOCK1, CDC42SE2, LRP12, ITGAV, EHD1, MERTK, DNM1, CLCN5	827	188	13588	2.09751	0.948323	0.0731541	1.87706
GOTERM_BP_FAT	GO:0002526~acute inflammatory response	14	0.118104	0.00112853	B4GALT1, CFB, EPHX2, IDO1, REG3B, REG3A, CD55, SERPINA1B, VNN1, REG3G, C2, CFI, DAF2, FN1	827	81	13588	2.83983	0.957309	0.0758162	1.99687
GOTERM_BP_FAT	GO:0016044~membrane organization	31	0.261515	0.00113757	MYO7A, NOSTRIN, ABCA1, PMAIP1, APLP1, CD47, BAK1, APP, PICALM, DOCK1, ITGAV, SNPH, PAFAH1B1, EHD1, DHCR24, LY75, PLD2, CUBN, HCK, ITGA3, SYNJ2BP, ELMO2, CORO1C, AP2A2, LRP1, CDC42SE2, LRP12, MERTK, CLN8, DNM1, CLCN5	827	272	13588	1.87259	0.958375	0.0746079	2.01271
GOTERM_BP_FAT	GO:0019884~antigen processing and presentation of exogenous antigen	8	0.0674878	0.00114759	H2-EB1, H2-AA, H2-DMB1, H2-AB1, H2-DMA, CD74, H2-DMB2, B2M	827	28	13588	4.69442	0.959525	0.0735162	2.03027
GOTERM_BP_FAT	GO:0006641~triglyceride metabolic process	9	0.0759237	0.00118834	MOGAT2, DGAT1, DGAT2, INSIG2, APOC3, AGPAT9, SLC22A4, CAT, MTTP	827	36	13588	4.10762	0.963884	0.0743259	2.10165
GOTERM_BP_FAT	GO:0006954~inflammatory response	27	0.227771	0.00121477	TOLLIP, CCL5, REG3B, CCL25, REG3A, TNFRSF1A, NLRC4, SERPINA1B, TICAM1, VNN1, CFI, C2, REG3G, NOS2, DAF2, FN1, B4GALT1, CIITA, BMP2, LIPA, CFB, EPHX2, IDO1, CD55, STAB1, KDM6B, IGFBP4	827	225	13588	1.97166	0.966456	0.0742554	2.14789
GOTERM_BP_FAT	GO:0008654~phospholipid biosynthetic process	14	0.118104	0.00142197	CHKA, PLD1, CDIPT, LPGAT1, SGMS2, EPT1, CDS1, LPCAT3, LPCAT4, SAMD8, AGPAT9, PCYT1A, PTDSS1, AGPAT2	827	83	13588	2.7714	0.981209	0.084532	2.50989
GOTERM_BP_FAT	GO:0046578~regulation of Ras protein signal transduction	23	0.194027	0.00146788	GIT1, ALS2, ABR, BCR, TBC1D10B, AGFG1, TBC1D9, ASAP1, DGKI, VAV2, ADAP1, NOTCH2, PLEKHG2, ADAP2, RASGRF2, TIAM2, SYDE1, PLEKHG6, BCL6, PAFAH1B1, TBC1D1, AGAP1, KALRN	827	181	13588	2.08785	0.983474	0.0853293	2.58992
GOTERM_BP_FAT	GO:0002684~positive regulation of immune system process	25	0.210899	0.00164698	TBK1, BCAR1, IL4RA, NFKBIA, PTPN22, PNP, ADA, CD74, B2M, TICAM1, VNN1, BCL6, ITCH, C2, CFI, DAF2, CFB, IDO1, H2-Q8, CD55, TNFSF13B, EREG, PLCG2, H2-AA, H2-DMA	827	206	13588	1.99399	0.989986	0.0933086	2.90155
GOTERM_BP_FAT	GO:0042127~regulation of cell proliferation	51	0.430235	0.00175615	EDN3, FOSL2, MARCKSL1, PTGS1, PRRX1, MMP7, PMAIP1, PNP, PTEN, KISS1, OSR2, ARHGAP5, HSF1, CDKN2B, TICAM1, GATA4, PDGFC, RARA, ITCH, NOS2, PITX2, IRS2, RB1, PROX1, MSX1, EREG, ADM, TNFSF13B, ZMIZ1, HIPK2, BEX1, NFKBIA, BCL2L1, ADA, RAC2, TGM2, LHX5, PLCD1, BCL6, AXIN2, SCG2, APC, B4GALT1, BMP2, TBX3, NDFIP1, IDO1, NOTCH2, IRF6, HBEGF, JAK2	827	538	13588	1.55754	0.992622	0.0972197	3.09106
GOTERM_BP_FAT	GO:0051270~regulation of cell motion	16	0.134976	0.00200872	B4GALT1, EDN3, IRS2, BCAR1, ABHD2, PTEN, ADA, KISS1, LAMA3, ARHGAP5, MAP3K1, HBEGF, BCL6, SST, APC, PITX2	827	107	13588	2.45689	0.996361	0.108288	3.52811
GOTERM_BP_FAT	GO:0046486~glycerolipid metabolic process	18	0.151847	0.00206855	MOGAT2, CHKA, PLD1, CDS1, PTEN, MTTP, LRAT, DGAT1, DGAT2, INSIG2, DGKD, AGPAT9, APOC3, SLC22A4, PCYT1A, CAT, PTDSS1, IPMK	827	129	13588	2.29262	0.996922	0.10923	3.63137
GOTERM_BP_FAT	GO:0006820~anion transport	18	0.151847	0.00224874	SLC25A4, CLCA6, 2610029I01RIK, SLCO2B1, SLC10A2, SLC34A2, SLC26A4, SLC16A3, SLC26A6, P2RY4, CLIC5, SLC25A22, SLC13A1, SLC4A8, SLCO3A1, CLN8, CLCN5, SLC4A5	827	130	13588	2.27499	0.998141	0.115993	3.94174
GOTERM_BP_FAT	GO:0006955~immune response	45	0.379619	0.00292991	TNFAIP8L2, CD8A, TBK1, TOLLIP, IL4RA, SUSD2, CX3CL1, CCL5, CD74, ADA, B2M, APOA4, RNF125, CD47, CCL25, OASL1, TICAM1, VNN1, BCL6, CFI, C2, PAG1, CD7, DAF2, CIITA, IL18R1, CFB, IL1RL1, H2-DMB1, H2-AB1, H2-DMB2, PSMB8, H2-Q8, DDX58, ATP7A, CD55, TNFSF10, GM8909, TNFSF13B, H2-BL, PLCG2, H2-EB1, H2-AA, H2-DMA, TNFAIP1	827	471	13588	1.56979	0.999724	0.145809	5.10648
GOTERM_BP_FAT	GO:0042325~regulation of phosphorylation	31	0.261515	0.00305444	ALS2, ITLN1, TRIB3, LPAR3, LATS1, CD74, BAK1, PRKAR2A, APP, DAB1, DGKD, MAP3K1, PDGFC, DNAJC3, PIK3R2, APC, IRAK2, BMP2, DGKQ, MADD, SOCS3, SOCS1, HGF, RB1, PRKCE, VAV2, ATP7A, ATXN1, PPP1R9B, EREG, JAK2	827	290	13588	1.75636	0.999805	0.148886	5.31798
GOTERM_BP_FAT	GO:0030334~regulation of cell migration	14	0.118104	0.0036335	EDN3, IRS2, BCAR1, ABHD2, PTEN, ADA, KISS1, LAMA3, ARHGAP5, MAP3K1, HBEGF, SST, APC, PITX2	827	92	13588	2.50029	0.999962	0.171613	6.29557
GOTERM_BP_FAT	GO:0009164~nucleoside catabolic process	4	0.0337439	0.00389609	CDA, DPYD, PNP, ADA	827	6	13588	10.9536	0.999982	0.179825	6.73574
GOTERM_BP_FAT	GO:0009064~glutamine family amino acid metabolic process	9	0.0759237	0.00390992	ALDH18A1, GOT1, NAGS, ARG2, GLS, OTC, NOS2, CPS1, PRODH	827	43	13588	3.43894	0.999982	0.177486	6.75886
GOTERM_BP_FAT	GO:0006631~fatty acid metabolic process	22	0.185591	0.00398463	PRKAG3, ACOX2, SC5D, EHHADH, PTGS1, EPHX2, ADIPOR2, LYPLA1, ACOT4, CD74, ELOVL1, FAR2, TNFRSF1A, ACSL1, BAAT, FAAH, LTA4H, HSD17B4, SLC27A2, CROT, ACSL5, SLC27A4	827	184	13588	1.96451	0.999986	0.177689	6.88371
GOTERM_BP_FAT	GO:0051336~regulation of hydrolase activity	23	0.194027	0.00398591	GIT1, ALS2, TBC1D10B, AGFG1, TBC1D9, GNA11, ASAP1, DGKI, ADAP1, BAK1, NLRC4, ADAP2, UACA, SYDE1, GNB1, TGM2, BCL6, PAFAH1B1, APAF1, TBC1D1, AGAP1, ANGPTL4, DHCR24	827	196	13588	1.92807	0.999986	0.174962	6.88585
GOTERM_BP_FAT	GO:0043087~regulation of GTPase activity	14	0.118104	0.00399536	GIT1, ALS2, AGFG1, TBC1D10B, TBC1D9, ASAP1, DGKI, ADAP1, ADAP2, SYDE1, PAFAH1B1, BCL6, TBC1D1, AGAP1	827	93	13588	2.4734	0.999986	0.17264	6.90163
GOTERM_BP_FAT	GO:0009611~response to wounding	35	0.295259	0.00405318	TOLLIP, ABHD2, CX3CL1, CCL5, REG3B, CCL25, REG3A, TNFRSF1A, NLRC4, SERPINA1B, GP1BB, MAP3K1, TICAM1, VNN1, CFI, NOS2, REG3G, C2, DAF2, FN1, B4GALT1, CIITA, KLF6, BMP2, LIPA, CFB, EPHX2, IDO1, NOTCH2, CD55, STAB1, TFPI, HBEGF, KDM6B, IGFBP4	827	347	13588	1.65725	0.999988	0.172262	6.99813
GOTERM_BP_FAT	GO:0046463~acylglycerol biosynthetic process	5	0.0421799	0.00452728	MOGAT2, DGAT1, DGAT2, AGPAT9, CDS1	827	12	13588	6.84603	0.999997	0.187599	7.7858
GOTERM_BP_FAT	GO:0046460~neutral lipid biosynthetic process	5	0.0421799	0.00452728	MOGAT2, DGAT1, DGAT2, AGPAT9, CDS1	827	12	13588	6.84603	0.999997	0.187599	7.7858
GOTERM_BP_FAT	GO:0051174~regulation of phosphorus metabolic process	31	0.261515	0.00523605	ALS2, ITLN1, TRIB3, LPAR3, LATS1, CD74, BAK1, PRKAR2A, APP, DAB1, DGKD, MAP3K1, PDGFC, DNAJC3, PIK3R2, APC, IRAK2, BMP2, DGKQ, MADD, SOCS3, SOCS1, HGF, RB1, PRKCE, VAV2, ATP7A, ATXN1, PPP1R9B, EREG, JAK2	827	301	13588	1.69217	1	0.21061	8.95162
GOTERM_BP_FAT	GO:0019220~regulation of phosphate metabolic process	31	0.261515	0.00523605	ALS2, ITLN1, TRIB3, LPAR3, LATS1, CD74, BAK1, PRKAR2A, APP, DAB1, DGKD, MAP3K1, PDGFC, DNAJC3, PIK3R2, APC, IRAK2, BMP2, DGKQ, MADD, SOCS3, SOCS1, HGF, RB1, PRKCE, VAV2, ATP7A, ATXN1, PPP1R9B, EREG, JAK2	827	301	13588	1.69217	1	0.21061	8.95162
GOTERM_BP_FAT	GO:0034655~nucleobase, nucleoside, nucleotide and nucleic acid catabolic process	8	0.0674878	0.00529725	ENTPD7, PDE5A, UPP1, CDA, DERA, DPYD, PNP, ADA	827	36	13588	3.65122	1	0.2098	9.05163
GOTERM_BP_FAT	GO:0034656~nucleobase, nucleoside and nucleotide catabolic process	8	0.0674878	0.00529725	ENTPD7, PDE5A, UPP1, CDA, DERA, DPYD, PNP, ADA	827	36	13588	3.65122	1	0.2098	9.05163
GOTERM_BP_FAT	GO:0051056~regulation of small GTPase mediated signal transduction	25	0.210899	0.00612153	ALS2, AGFG1, TBC1D9, IQGAP2, ASAP1, ADAP1, PLEKHG2, TIAM2, PLEKHG6, BCL6, PAFAH1B1, AGAP1, RAPGEF2, TBC1D1, GIT1, BCR, ABR, TBC1D10B, DGKI, VAV2, NOTCH2, ADAP2, RASGRF2, SYDE1, KALRN	827	228	13588	1.80159	1	0.235068	10.3885
GOTERM_BP_FAT	GO:0046165~alcohol biosynthetic process	8	0.0674878	0.00619806	GPD2, GPD1, GNPDA1, GOT1, GM8615, PLCG2, ALDOB, FBP1, FBP2	827	37	13588	3.55253	1	0.234445	10.5117
GOTERM_BP_FAT	GO:0046504~glycerol ether biosynthetic process	5	0.0421799	0.00622826	MOGAT2, DGAT1, DGAT2, AGPAT9, CDS1	827	13	13588	6.31941	1	0.232328	10.5603
GOTERM_BP_FAT	GO:0015804~neutral amino acid transport	5	0.0421799	0.00622826	SLC38A3, SLC6A6, SLC3A2, SLC7A9, SLC6A19	827	13	13588	6.31941	1	0.232328	10.5603
GOTERM_BP_FAT	GO:0044242~cellular lipid catabolic process	10	0.0843597	0.00624743	ACOX2, ENPP7, SMPDL3B, FAAH, EHHADH, PLCG2, APOC3, HSD17B4, SLC27A2, SLC27A4	827	56	13588	2.93401	1	0.229912	10.5911
GOTERM_BP_FAT	GO:0034637~cellular carbohydrate biosynthetic process	10	0.0843597	0.00624743	PRKAG3, GPD2, B4GALT1, GPD1, GNPDA1, GOT1, GM8615, PLCG2, ALDOB, FBP1, FBP2	827	56	13588	2.93401	1	0.229912	10.5911
GOTERM_BP_FAT	GO:0006577~betaine metabolic process	4	0.0337439	0.0065113	CHDH, SLC22A4, SLC22A5, ALDH9A1	827	7	13588	9.38884	1	0.235334	11.0142
GOTERM_BP_FAT	GO:0040012~regulation of locomotion	15	0.12654	0.00673272	EDN3, IRS2, BCAR1, ABHD2, PTEN, ADA, KISS1, LAMA3, ARHGAP5, MAP3K1, HBEGF, SST, SCG2, APC, PITX2	827	110	13588	2.24052	1	0.23925	11.3679
GOTERM_BP_FAT	GO:0032870~cellular response to hormone stimulus	10	0.0843597	0.00788396	WDTC1, SGK1, IRS2, SORBS1, BCAR1, ADIPOR2, JAK2, LATS1, PIK3R2, NR1H3	827	58	13588	2.83284	1	0.270807	13.1851
GOTERM_BP_FAT	GO:0015711~organic anion transport	8	0.0674878	0.00833531	SLC16A3, SLC26A6, SLC25A4, SLC25A22, SLCO3A1, SLCO2B1, SLC10A2, CLN8	827	39	13588	3.37035	1	0.28055	13.8879
GOTERM_BP_FAT	GO:0007167~enzyme linked receptor protein signaling pathway	28	0.236207	0.00864749	USP9X, BCAR1, TIPARP, BEX1, PTEN, SORBS1, MAP3K1, LMTK2, PDGFC, SKIL, NR1H3, PIK3R2, PLAT, SGPL1, BMP2, RET, IRS2, PTPRE, MYO1E, HGF, EPHA1, EPHA2, MSX1, EREG, HIPK2, HBEGF, JAK2, PLEKHA1	827	273	13588	1.68518	1	0.286026	14.3709
GOTERM_BP_FAT	GO:0046890~regulation of lipid biosynthetic process	6	0.0506158	0.00907686	WDTC1, SORBS1, INSIG2, MLXIPL, NR3C1, SEC14L2	827	22	13588	4.48104	1	0.294514	15.031
GOTERM_BP_FAT	GO:0000041~transition metal ion transport	11	0.0927957	0.00939221	ATP7A, SLC39A14, SLC30A1, SLC30A4, SLC25A37, HEPH, SFXN1, TCN2, SLC39A4, SLC31A1, ATP7B	827	70	13588	2.58193	1	0.299645	15.5127
GOTERM_BP_FAT	GO:0055069~zinc ion homeostasis	4	0.0337439	0.00995071	SLC30A1, SLC30A4, SLC39A4, ATP7B	827	8	13588	8.21524	1	0.310936	16.3596
GOTERM_BP_FAT	GO:0019432~triglyceride biosynthetic process	4	0.0337439	0.00995071	MOGAT2, DGAT1, DGAT2, AGPAT9	827	8	13588	8.21524	1	0.310936	16.3596
GOTERM_BP_FAT	GO:0046121~deoxyribonucleoside catabolic process	3	0.0253079	0.0106255	DPYD, PNP, ADA	827	3	13588	16.4305	1	0.324686	17.3721
GOTERM_BP_FAT	GO:0009062~fatty acid catabolic process	6	0.0506158	0.0110298	ACOX2, FAAH, EHHADH, HSD17B4, SLC27A2, SLC27A4	827	23	13588	4.28621	1	0.331222	17.9732
GOTERM_BP_FAT	GO:0032312~regulation of ARF GTPase activity	6	0.0506158	0.0110298	GIT1, ADAP2, AGFG1, ASAP1, AGAP1, ADAP1	827	23	13588	4.28621	1	0.331222	17.9732
GOTERM_BP_FAT	GO:0045582~positive regulation of T cell differentiation	7	0.0590518	0.0115285	IL4RA, H2-AA, VNN1, H2-DMA, PNP, CD74, ADA	827	32	13588	3.59417	1	0.339796	18.7089
GOTERM_BP_FAT	GO:0044270~nitrogen compound catabolic process	8	0.0674878	0.0124926	ENTPD7, PDE5A, UPP1, CDA, DERA, DPYD, PNP, ADA	827	42	13588	3.12961	1	0.358824	20.1137
GOTERM_BP_FAT	GO:0007169~transmembrane receptor protein tyrosine kinase signaling pathway	21	0.177155	0.0129861	PLAT, SGPL1, RET, IRS2, MYO1E, BCAR1, TIPARP, BEX1, HGF, PTEN, EPHA1, EPHA2, EREG, SORBS1, LMTK2, HBEGF, JAK2, PDGFC, PIK3R2, PLEKHA1, NR1H3	827	192	13588	1.79708	1	0.366406	20.8238
GOTERM_BP_FAT	GO:0008284~positive regulation of cell proliferation	28	0.236207	0.0140822	EDN3, FOSL2, MARCKSL1, BEX1, PRRX1, BCL2L1, PNP, ADA, OSR2, ARHGAP5, RAC2, TICAM1, TGM2, LHX5, BCL6, PDGFC, RARA, SCG2, B4GALT1, IRS2, TBX3, PROX1, TNFSF13B, ADM, EREG, ZMIZ1, HIPK2, HBEGF	827	284	13588	1.61991	1	0.386778	22.3799
GOTERM_BP_FAT	GO:0044092~negative regulation of molecular function	16	0.134976	0.0141565	IRAK2, PALM, TRIB3, NFKBIA, RB1, LATS1, ATP7A, CHRM4, ARG2, JAK2, CAT, DNAJC3, CLN8, DHCR24, APC, ANGPTL4	827	132	13588	1.99157	1	0.38469	22.4843
GOTERM_BP_FAT	GO:0050892~intestinal absorption	4	0.0337439	0.0142587	ABCG8, MOGAT2, ABCG5, SLC5A1	827	9	13588	7.30243	1	0.383235	22.6277
GOTERM_BP_FAT	GO:0000050~urea cycle	4	0.0337439	0.0142587	NAGS, ARG2, OTC, CPS1	827	9	13588	7.30243	1	0.383235	22.6277
GOTERM_BP_FAT	GO:0006525~arginine metabolic process	4	0.0337439	0.0142587	NAGS, ARG2, OTC, NOS2	827	9	13588	7.30243	1	0.383235	22.6277
GOTERM_BP_FAT	GO:0019627~urea metabolic process	4	0.0337439	0.0142587	NAGS, ARG2, OTC, CPS1	827	9	13588	7.30243	1	0.383235	22.6277
GOTERM_BP_FAT	GO:0002828~regulation of T-helper 2 type immune response	4	0.0337439	0.0142587	IL4RA, NDFIP1, BCL6, IDO1	827	9	13588	7.30243	1	0.383235	22.6277
GOTERM_BP_FAT	GO:0035023~regulation of Rho protein signal transduction	12	0.101232	0.0147971	ALS2, PLEKHG2, BCR, ABR, RASGRF2, TIAM2, SYDE1, PLEKHG6, BCL6, PAFAH1B1, VAV2, KALRN	827	86	13588	2.29262	1	0.390844	23.3792
GOTERM_BP_FAT	GO:0045621~positive regulation of lymphocyte differentiation	7	0.0590518	0.0154397	IL4RA, H2-AA, VNN1, H2-DMA, PNP, CD74, ADA	827	34	13588	3.38274	1	0.400278	24.267
GOTERM_BP_FAT	GO:0019319~hexose biosynthetic process	6	0.0506158	0.0157547	GPD2, GPD1, GNPDA1, GM8615, ALDOB, FBP1, FBP2	827	25	13588	3.94331	1	0.402938	24.6986
GOTERM_BP_FAT	GO:0007162~negative regulation of cell adhesion	6	0.0506158	0.0157547	NAT8, DAB1, BCL6, CML5, PTEN, CML2	827	25	13588	3.94331	1	0.402938	24.6986
GOTERM_BP_FAT	GO:0019882~antigen processing and presentation	12	0.101232	0.016041	GM8909, H2-BL, H2-EB1, H2-AA, H2-DMB1, H2-AB1, H2-DMA, CD74, H2-Q8, H2-DMB2, PSMB8, B2M	827	87	13588	2.26627	1	0.404973	25.089
GOTERM_BP_FAT	GO:0008219~cell death	44	0.371183	0.0166399	DPF2, NUAK2, SGPP1, EGLN3, STK17B, RTKN, TRIB3, ARF6, BCL2L1, PMAIP1, FEM1B, PTEN, APLP1, BAK1, TNFRSF1A, BAG4, SHB, NLRC4, APP, DOCK1, UNC5B, MAP3K1, TICAM1, FGL2, IRAK2, SGPL1, SGK1, LYZ2, LYZ1, ROCK1, MADD, GZMA, CIDEB, GZMB, ELMO2, CIDEC, ATP7A, SEMA6A, TNFSF10, HIPK2, JAK2, CDK11B, APAF1, CLN8	827	507	13588	1.42592	1	0.412907	25.8994
GOTERM_BP_FAT	GO:0016125~sterol metabolic process	11	0.0927957	0.0177817	SOAT2, SC5D, CUBN, INSIG2, APOC3, NPC1L1, ABCA1, CAT, CLN8, HSD17B7, DHCR24	827	77	13588	2.34721	1	0.430528	27.4213
GOTERM_BP_FAT	GO:0002819~regulation of adaptive immune response	9	0.0759237	0.0191821	TNFSF13B, IL4RA, NDFIP1, BCL6, IDO1, PNP, ADA, H2-Q8, B2M	827	56	13588	2.64061	1	0.451775	29.2478
GOTERM_BP_FAT	GO:0002822~regulation of adaptive immune response based on somatic recombination of immune receptors built from immunoglobulin superfamily domains	9	0.0759237	0.0191821	TNFSF13B, IL4RA, NDFIP1, BCL6, IDO1, PNP, ADA, H2-Q8, B2M	827	56	13588	2.64061	1	0.451775	29.2478
GOTERM_BP_FAT	GO:0009065~glutamine family amino acid catabolic process	4	0.0337439	0.0194618	GOT1, GLS, NOS2, PRODH	827	10	13588	6.57219	1	0.452951	29.6073
GOTERM_BP_FAT	GO:0043604~amide biosynthetic process	4	0.0337439	0.0194618	NAGS, ARG2, OTC, CPS1	827	10	13588	6.57219	1	0.452951	29.6073
GOTERM_BP_FAT	GO:0006684~sphingomyelin metabolic process	4	0.0337439	0.0194618	SAMD8, ENPP7, SGMS2, SMPDL3B	827	10	13588	6.57219	1	0.452951	29.6073
GOTERM_BP_FAT	GO:0048845~venous blood vessel morphogenesis	3	0.0253079	0.0203963	CCBE1, PROX1, PITX2	827	4	13588	12.3229	1	0.465063	30.7961
GOTERM_BP_FAT	GO:0006020~inositol metabolic process	5	0.0421799	0.0209257	PLCG2, PPIP5K2, ITPK1, PTEN, IPMK	827	18	13588	4.56402	1	0.470125	31.4611
GOTERM_BP_FAT	GO:0050727~regulation of inflammatory response	9	0.0759237	0.0211663	TNFRSF1A, CD47, UACA, GPX4, NDFIP1, TGM2, BCL6, IDO1, ADA	827	57	13588	2.59428	1	0.470414	31.7614
GOTERM_BP_FAT	GO:0006766~vitamin metabolic process	10	0.0843597	0.0232693	RDH9, ALDH1A1, PDXK, LRAT, RFK, SLC22A4, ALDH1A7, SLC22A5, ALDH9A1, NAPRT1	827	69	13588	2.38123	1	0.499527	34.3334
GOTERM_BP_FAT	GO:0045017~glycerolipid biosynthetic process	9	0.0759237	0.0232914	CHKA, MOGAT2, PLD1, DGAT1, DGAT2, AGPAT9, PCYT1A, CDS1, PTDSS1	827	58	13588	2.54956	1	0.496238	34.36
GOTERM_BP_FAT	GO:0045619~regulation of lymphocyte differentiation	9	0.0759237	0.0232914	IL4RA, NDFIP1, H2-AA, VNN1, BCL6, H2-DMA, PNP, CD74, ADA	827	58	13588	2.54956	1	0.496238	34.36
GOTERM_BP_FAT	GO:0019216~regulation of lipid metabolic process	9	0.0759237	0.0232914	WDTC1, SORBS1, INSIG2, MLXIPL, RB1, NR3C1, VAV2, SEC14L2, ANGPTL4	827	58	13588	2.54956	1	0.496238	34.36
GOTERM_BP_FAT	GO:0016265~death	44	0.371183	0.0235914	DPF2, NUAK2, SGPP1, EGLN3, STK17B, RTKN, TRIB3, ARF6, BCL2L1, PMAIP1, FEM1B, PTEN, APLP1, BAK1, TNFRSF1A, BAG4, SHB, NLRC4, APP, DOCK1, UNC5B, MAP3K1, TICAM1, FGL2, IRAK2, SGPL1, SGK1, LYZ2, LYZ1, ROCK1, MADD, GZMA, CIDEB, GZMB, ELMO2, CIDEC, ATP7A, SEMA6A, TNFSF10, HIPK2, JAK2, CDK11B, APAF1, CLN8	827	519	13588	1.39295	1	0.497131	34.7191
GOTERM_BP_FAT	GO:0043069~negative regulation of programmed cell death	24	0.202463	0.0242805	TBX3, SGK3, NUAK2, ROCK1, PIM1, HGF, CX3CL1, IDO1, BCL2L1, PTEN, PNP, ADA, CD74, MSX1, TNFSF13B, HIPK2, PLCG2, VNN1, BCL6, CLN8, ANGPTL4, APC, DHCR24, SCG2	827	244	13588	1.61611	1	0.50368	35.5373
GOTERM_BP_FAT	GO:0016311~dephosphorylation	16	0.134976	0.0243948	PTPRJ, PTPRD, PTPRE, PTPRG, PTPRH, PPM1A, PTPRR, PTPN22, PTPN21, PTEN, TPTE, DUSP5, MTMR11, DUSP14, PPM1H, MTMR4	827	141	13588	1.86445	1	0.501804	35.6721
GOTERM_BP_FAT	GO:0046395~carboxylic acid catabolic process	11	0.0927957	0.0245449	ACOX2, GOT1, FAAH, EHHADH, GLS, NOS2, IDO1, HSD17B4, SLC27A2, SLC27A4, PRODH	827	81	13588	2.2313	1	0.500473	35.8486
GOTERM_BP_FAT	GO:0016054~organic acid catabolic process	11	0.0927957	0.0245449	ACOX2, GOT1, FAAH, EHHADH, GLS, NOS2, IDO1, HSD17B4, SLC27A2, SLC27A4, PRODH	827	81	13588	2.2313	1	0.500473	35.8486
GOTERM_BP_FAT	GO:0045580~regulation of T cell differentiation	8	0.0674878	0.0249376	IL4RA, H2-AA, VNN1, BCL6, H2-DMA, PNP, CD74, ADA	827	48	13588	2.73841	1	0.502597	36.3084
GOTERM_BP_FAT	GO:0006915~apoptosis	40	0.337439	0.0252587	DPF2, NUAK2, SGPP1, EGLN3, STK17B, RTKN, TRIB3, ARF6, BCL2L1, PMAIP1, FEM1B, PTEN, APLP1, BAK1, TNFRSF1A, SHB, BAG4, NLRC4, APP, DOCK1, UNC5B, MAP3K1, TICAM1, IRAK2, SGPL1, SGK1, ROCK1, MADD, GZMA, CIDEB, GZMB, ELMO2, CIDEC, ATP7A, SEMA6A, TNFSF10, HIPK2, JAK2, CDK11B, APAF1	827	465	13588	1.41337	1	0.503676	36.682
GOTERM_BP_FAT	GO:0008203~cholesterol metabolic process	10	0.0843597	0.0253167	SOAT2, CUBN, INSIG2, APOC3, NPC1L1, ABCA1, CAT, CLN8, HSD17B7, DHCR24	827	70	13588	2.34721	1	0.501095	36.7493
GOTERM_BP_FAT	GO:0060548~negative regulation of cell death	24	0.202463	0.0253195	TBX3, SGK3, NUAK2, ROCK1, PIM1, HGF, CX3CL1, IDO1, BCL2L1, PTEN, PNP, ADA, CD74, MSX1, TNFSF13B, HIPK2, PLCG2, VNN1, BCL6, CLN8, ANGPTL4, APC, DHCR24, SCG2	827	245	13588	1.60952	1	0.497787	36.7526
GOTERM_BP_FAT	GO:0016051~carbohydrate biosynthetic process	11	0.0927957	0.0285445	PRKAG3, GPD2, B4GALT1, GPD1, GNPDA1, GOT1, GM8615, PLCG2, ALDOB, FBP1, FBP2, GLCE	827	83	13588	2.17753	1	0.53714	40.3883
GOTERM_BP_FAT	GO:0044271~nitrogen compound biosynthetic process	28	0.236207	0.0286205	MOCOS, ADSS, ALDH18A1, NAGS, ADCY8, AGMAT, PNP, ADA, CMPK2, ATP2B1, GOT1, ARG2, NOS2, GUCA2B, NAPRT1, CHDH, MOCS2, OTC, CPS1, ATP7A, ATP6V0E2, ADCY9, RFK, BHMT, DPYD, ATP6V0A2, ATP7B, PRODH	827	302	13588	1.52335	1	0.534725	40.4716
GOTERM_BP_FAT	GO:0045087~innate immune response	13	0.109668	0.0289481	CIITA, TNFAIP8L2, IL18R1, TBK1, IL1RL1, CFB, APOA4, DDX58, CD55, VNN1, C2, CFI, DAF2	827	107	13588	1.99623	1	0.535494	40.8293
GOTERM_BP_FAT	GO:0006094~gluconeogenesis	5	0.0421799	0.0301005	GPD2, GPD1, ALDOB, FBP1, FBP2	827	20	13588	4.10762	1	0.546331	42.0711
GOTERM_BP_FAT	GO:0050863~regulation of T cell activation	13	0.109668	0.0308407	IL4RA, NDFIP1, IDO1, PNP, CD74, ADA, TNFSF13B, H2-AA, VNN1, BCL6, ITCH, H2-DMA, PAG1	827	108	13588	1.97774	1	0.551882	42.8558
GOTERM_BP_FAT	GO:0012501~programmed cell death	40	0.337439	0.0320809	DPF2, NUAK2, SGPP1, EGLN3, STK17B, RTKN, TRIB3, ARF6, BCL2L1, PMAIP1, FEM1B, PTEN, APLP1, BAK1, TNFRSF1A, SHB, BAG4, NLRC4, APP, DOCK1, UNC5B, MAP3K1, TICAM1, IRAK2, SGPL1, SGK1, ROCK1, MADD, GZMA, CIDEB, GZMB, ELMO2, CIDEC, ATP7A, SEMA6A, TNFSF10, HIPK2, JAK2, CDK11B, APAF1	827	473	13588	1.38947	1	0.563041	44.1481
GOTERM_BP_FAT	GO:0042044~fluid transport	4	0.0337439	0.0325862	AQP7, AQP1, SLC14A1, AQP3	827	12	13588	5.47682	1	0.565516	44.6666
GOTERM_BP_FAT	GO:0051085~chaperone mediated protein folding requiring cofactor	4	0.0337439	0.0325862	H2-DMB1, H2-DMA, CD74, H2-DMB2	827	12	13588	5.47682	1	0.565516	44.6666
GOTERM_BP_FAT	GO:0006833~water transport	4	0.0337439	0.0325862	AQP7, AQP1, SLC14A1, AQP3	827	12	13588	5.47682	1	0.565516	44.6666
GOTERM_BP_FAT	GO:0042454~ribonucleoside catabolic process	3	0.0253079	0.0326337	CDA, PNP, ADA	827	5	13588	9.85828	1	0.562806	44.7152
GOTERM_BP_FAT	GO:0043588~skin development	6	0.0506158	0.032947	FRAS1, ATP7A, IRF6, SLC27A4, APC, DHCR24	827	30	13588	3.28609	1	0.563105	45.0341
GOTERM_BP_FAT	GO:0044093~positive regulation of molecular function	28	0.236207	0.0330605	ALS2, GNA11, LPAR3, CD74, BAK1, NLRC4, DAB1, DGKD, MAP3K1, TICAM1, TGM2, PDGFC, CAT, IRAK2, DGKQ, MADD, HGF, VAV2, ATP7A, UACA, EREG, ADCY9, SYDE1, GNB1, HIPK2, PLCG2, CALM3, APAF1	827	306	13588	1.50344	1	0.561184	45.1493
GOTERM_BP_FAT	GO:0006665~sphingolipid metabolic process	9	0.0759237	0.03329	SAMD8, SGPL1, ENPP7, SGMS2, SMPDL3B, SGPP1, UGCG, B4GALT6, CLN8	827	62	13588	2.38507	1	0.56057	45.3813
GOTERM_BP_FAT	GO:0001819~positive regulation of cytokine production	9	0.0759237	0.03329	DDX58, EREG, PANX1, TICAM1, GATA4, CX3CL1, IDO1, H2-Q8, IFNAR1	827	62	13588	2.38507	1	0.56057	45.3813
GOTERM_BP_FAT	GO:0051338~regulation of transferase activity	20	0.168719	0.0340362	IRAK2, ALS2, DGKQ, MADD, TRIB3, LPAR3, HGF, RB1, VAV2, LATS1, CD74, APP, DAB1, EREG, DGKD, MAP3K1, PDGFC, DNAJC3, CLN8, APC	827	199	13588	1.6513	1	0.565596	46.1296
GOTERM_BP_FAT	GO:0043066~negative regulation of apoptosis	23	0.194027	0.0341773	TBX3, SGK3, NUAK2, ROCK1, PIM1, HGF, CX3CL1, IDO1, BCL2L1, PTEN, PNP, ADA, CD74, MSX1, TNFSF13B, HIPK2, VNN1, BCL6, CLN8, ANGPTL4, APC, DHCR24, SCG2	827	239	13588	1.58118	1	0.564013	46.27
GOTERM_BP_FAT	GO:0002253~activation of immune response	11	0.0927957	0.0353796	CD55, TBK1, CFB, BCAR1, PLCG2, TICAM1, PTPN22, NFKBIA, CFI, C2, DAF2	827	86	13588	2.10157	1	0.573691	47.4523
GOTERM_BP_FAT	GO:0046364~monosaccharide biosynthetic process	6	0.0506158	0.0373865	GPD2, GPD1, GNPDA1, GM8615, ALDOB, FBP1, FBP2	827	31	13588	3.18009	1	0.591109	49.3714
GOTERM_BP_FAT	GO:0006979~response to oxidative stress	11	0.0927957	0.0378911	ATP7A, ALS2, MTF1, GPX4, PTGS1, CAT, PPP1R15B, CLN8, SRXN1, NAPRT1, DHCR24	827	87	13588	2.07742	1	0.593047	49.8433
GOTERM_BP_FAT	GO:0006643~membrane lipid metabolic process	9	0.0759237	0.0392429	SAMD8, SGPL1, ENPP7, SGMS2, SMPDL3B, SGPP1, UGCG, B4GALT6, CLN8	827	64	13588	2.31054	1	0.603104	51.0874
GOTERM_BP_FAT	GO:0016192~vesicle-mediated transport	39	0.329003	0.0394876	ALS2, GNPDA1, MYO7A, NBEA, ARF6, NOSTRIN, ABCA1, LMAN1, APLP1, CD47, AP2B1, APP, DOCK1, PICALM, ITGAV, SNPH, EHD1, SAR1B, SEC23A, LY75, PLD2, STX3, CUBN, GOLT1A, GM8615, HCK, SYNJ2BP, ELMO2, CORO1C, AP2A2, LRP1, CDC42SE2, STXBP5, LRP12, MCFD2, SYTL5, SYTL3, MERTK, DNM1, CLCN5	827	466	13588	1.37508	1	0.602412	51.3094
GOTERM_BP_FAT	GO:0050868~negative regulation of T cell activation	7	0.0590518	0.0400613	IL4RA, NDFIP1, BCL6, ITCH, IDO1, CD74, PAG1	827	42	13588	2.73841	1	0.604818	51.8264
GOTERM_BP_FAT	GO:0045767~regulation of anti-apoptosis	4	0.0337439	0.0404936	RTKN, RARA, BCL2L1, PIK3R2	827	13	13588	5.05553	1	0.605867	52.2124
GOTERM_BP_FAT	GO:0015695~organic cation transport	4	0.0337439	0.0404936	SLC22A4, RHBG, SLC22A3, SLC22A5	827	13	13588	5.05553	1	0.605867	52.2124
GOTERM_BP_FAT	GO:0015908~fatty acid transport	4	0.0337439	0.0404936	SLC27A2, CROT, SLCO2A1, SLC27A4	827	13	13588	5.05553	1	0.605867	52.2124
GOTERM_BP_FAT	GO:0043086~negative regulation of catalytic activity	12	0.101232	0.0426586	ATP7A, PALM, CHRM4, ARG2, TRIB3, RB1, DNAJC3, LATS1, CLN8, ANGPTL4, APC, DHCR24	827	101	13588	1.95214	1	0.622465	54.1023
GOTERM_BP_FAT	GO:0006470~protein amino acid dephosphorylation	13	0.109668	0.0440939	PTPRJ, PTPRD, PTPRE, PTPRG, PTPRH, PPM1A, PTPRR, PTPN22, PTPN21, PTEN, DUSP5, DUSP14, PPM1H	827	114	13588	1.87365	1	0.631981	55.3162
GOTERM_BP_FAT	GO:0032869~cellular response to insulin stimulus	7	0.0590518	0.0442613	WDTC1, SGK1, IRS2, SORBS1, BCAR1, PIK3R2, NR1H3	827	43	13588	2.67473	1	0.630498	55.4558
GOTERM_BP_FAT	GO:0001816~cytokine production	7	0.0590518	0.0442613	MAF, NLRC4, LIPA, NFAT5, IDO1, PCSK5, IFNAR1	827	43	13588	2.67473	1	0.630498	55.4558
GOTERM_BP_FAT	GO:0043549~regulation of kinase activity	19	0.160283	0.044586	IRAK2, ALS2, DGKQ, MADD, TRIB3, LPAR3, HGF, RB1, VAV2, LATS1, CD74, APP, DAB1, EREG, DGKD, MAP3K1, PDGFC, DNAJC3, APC	827	192	13588	1.62593	1	0.630364	55.7253
GOTERM_BP_FAT	GO:0009437~carnitine metabolic process	3	0.0253079	0.0470025	SLC22A4, SLC22A5, ALDH9A1	827	6	13588	8.21524	1	0.647376	57.6836
GOTERM_BP_FAT	GO:0035051~cardiac cell differentiation	6	0.0506158	0.0473162	BMP2, RXRA, GATA4, RARA, SOX6, PROX1	827	33	13588	2.98736	1	0.647042	57.9317
GOTERM_BP_FAT	GO:0050830~defense response to Gram-positive bacterium	5	0.0421799	0.0476817	LYZ2, PLD1, LYZ1, TBK1, HCK	827	23	13588	3.57184	1	0.647124	58.2191
GOTERM_BP_FAT	GO:0019835~cytolysis	5	0.0421799	0.0476817	LYZ2, LYZ1, GZMA, FGL2, GZMB	827	23	13588	3.57184	1	0.647124	58.2191
GOTERM_BP_FAT	GO:0046394~carboxylic acid biosynthetic process	15	0.12654	0.0477673	PRKAG3, PLD1, SC5D, ALDH18A1, NAGS, OTC, PTGS1, IDO1, CD74, ELOVL1, FAR2, GOT1, BHMT, LTA4H, PRODH	827	141	13588	1.74792	1	0.645004	58.2861
GOTERM_BP_FAT	GO:0016053~organic acid biosynthetic process	15	0.12654	0.0477673	PRKAG3, PLD1, SC5D, ALDH18A1, NAGS, OTC, PTGS1, IDO1, CD74, ELOVL1, FAR2, GOT1, BHMT, LTA4H, PRODH	827	141	13588	1.74792	1	0.645004	58.2861
GOTERM_BP_FAT	GO:0060323~head morphogenesis	4	0.0337439	0.0492721	SGPL1, MFSD7B, TIPARP, PLEKHA1	827	14	13588	4.69442	1	0.653916	59.4481
GOTERM_BP_FAT	GO:0051084~'de novo' posttranslational protein folding	4	0.0337439	0.0492721	H2-DMB1, H2-DMA, CD74, H2-DMB2	827	14	13588	4.69442	1	0.653916	59.4481
GOTERM_BP_FAT	GO:0032319~regulation of Rho GTPase activity	4	0.0337439	0.0492721	ALS2, SYDE1, BCL6, PAFAH1B1	827	14	13588	4.69442	1	0.653916	59.4481
GOTERM_BP_FAT	GO:0022600~digestive system process	4	0.0337439	0.0492721	ABCG8, MOGAT2, ABCG5, SLC5A1	827	14	13588	4.69442	1	0.653916	59.4481
GOTERM_BP_FAT	GO:0008272~sulfate transport	4	0.0337439	0.0492721	SLC26A4, SLC26A6, SLC13A1, 2610029I01RIK	827	14	13588	4.69442	1	0.653916	59.4481
GOTERM_BP_FAT	GO:0006458~'de novo' protein folding	4	0.0337439	0.0492721	H2-DMB1, H2-DMA, CD74, H2-DMB2	827	14	13588	4.69442	1	0.653916	59.4481
GOTERM_BP_FAT	GO:0006825~copper ion transport	4	0.0337439	0.0492721	ATP7A, HEPH, SLC31A1, ATP7B	827	14	13588	4.69442	1	0.653916	59.4481
GOTERM_BP_FAT	GO:0019318~hexose metabolic process	17	0.143412	0.0519835	PRKAG3, B4GALT1, GPD2, PDK2, GPD1, WDTC1, GNPDA1, PFKFB4, GM8615, HKDC1, ALDOB, FBP1, IGF2, FBP2, FUCA2, GALM, MAN2B2, PKLR	827	169	13588	1.65277	1	0.671325	61.4651
GOTERM_BP_FAT	GO:0006811~ion transport	55	0.463978	0.0527991	KCNJ16, SLC5A1, ATP2B1, SLC25A22, SLC22A4, SLC22A3, NIPAL1, SLC22A5, ANO6, SLC4A5, SLC25A4, CLCA6, 2610029I01RIK, TCN2, SLC34A2, SLC26A4, SLC26A6, SLC41A2, CLIC5, SLC41A3, SLC25A37, CLN8, TNFAIP1, SLC39A14, SLC38A3, RHBG, SFXN1, TTYH3, TMEM37, SLC5A4B, P2RY4, SLC5A4A, SLC30A1, TTYH2, SLC30A4, CAMK2D, SLC4A8, SLC30A2, SLCO3A1, SLC39A4, SLC31A1, SLCO2B1, SLC10A2, ITPR2, SLC16A3, ATP7A, ATP6V0E2, SL…	827	712	13588	1.26921	1	0.674453	62.053
GOTERM_BP_FAT	GO:0006767~water-soluble vitamin metabolic process	6	0.0506158	0.0528121	PDXK, RFK, SLC22A4, SLC22A5, ALDH9A1, NAPRT1	827	34	13588	2.89949	1	0.671849	62.0624
GOTERM_BP_FAT	GO:0002824~positive regulation of adaptive immune response based on somatic recombination of immune receptors built from immunoglobulin superfamily domains	6	0.0506158	0.0528121	TNFSF13B, IDO1, PNP, ADA, H2-Q8, B2M	827	34	13588	2.89949	1	0.671849	62.0624
GOTERM_BP_FAT	GO:0002821~positive regulation of adaptive immune response	6	0.0506158	0.0528121	TNFSF13B, IDO1, PNP, ADA, H2-Q8, B2M	827	34	13588	2.89949	1	0.671849	62.0624
GOTERM_BP_FAT	GO:0006836~neurotransmitter transport	10	0.0843597	0.0531403	STX3, SLC6A20B, SLC25A4, SLC6A20A, SLC6A4, SLC6A6, SLC22A3, SLC6A18, SLC6A19, CLN8	827	80	13588	2.05381	1	0.671497	62.2964
GOTERM_BP_FAT	GO:0006576~biogenic amine metabolic process	10	0.0843597	0.0531403	ATP7A, CHKA, CHDH, LRAT, SLC22A4, PCYT1A, SLC22A5, IDO1, AGMAT, ALDH9A1	827	80	13588	2.05381	1	0.671497	62.2964
GOTERM_BP_FAT	GO:0030097~hemopoiesis	23	0.194027	0.0536252	SGPL1, CD8A, MYO1E, TIPARP, PTPN22, RORC, SFXN1, TTC7, RB1, SOX6, ADA, CD74, ATP7A, BAK1, PICALM, ID2, MFSD7B, PLCG2, BCL6, JAK2, HEPH, H2-DMA, APC	827	251	13588	1.50558	1	0.672252	62.6399
GOTERM_BP_FAT	GO:0045834~positive regulation of lipid metabolic process	5	0.0421799	0.0545679	SORBS1, MLXIPL, VAV2, SEC14L2, ANGPTL4	827	24	13588	3.42301	1	0.676162	63.2992
GOTERM_BP_FAT	GO:0007050~cell cycle arrest	8	0.0674878	0.056277	GAS2L3, NOTCH2, CGREF1, RB1, SKIL, PMP22, SESN1, APC	827	57	13588	2.30603	1	0.685118	64.4664
GOTERM_BP_FAT	GO:0031349~positive regulation of defense response	8	0.0674878	0.056277	TNFRSF1A, CD47, EREG, TBK1, TICAM1, TGM2, NFKBIA, IDO1	827	57	13588	2.30603	1	0.685118	64.4664
GOTERM_BP_FAT	GO:0046700~heterocycle catabolic process	7	0.0590518	0.0584601	PDE5A, CDA, IDO1, DPYD, PNP, ADA, PRODH	827	46	13588	2.50029	1	0.696761	65.9064
GOTERM_BP_FAT	GO:0009084~glutamine family amino acid biosynthetic process	4	0.0337439	0.0588928	ALDH18A1, NAGS, OTC, PRODH	827	15	13588	4.38146	1	0.696955	66.1852
GOTERM_BP_FAT	GO:0045859~regulation of protein kinase activity	18	0.151847	0.06056	IRAK2, ALS2, DGKQ, MADD, TRIB3, LPAR3, HGF, RB1, LATS1, CD74, APP, DAB1, EREG, DGKD, MAP3K1, PDGFC, DNAJC3, APC	827	186	13588	1.59005	1	0.704816	67.2395
GOTERM_BP_FAT	GO:0001655~urogenital system development	15	0.12654	0.0606109	PLAG1, SGPL1, RET, BMP2, MYO1E, RXRA, SLC5A1, TIPARP, FEM1B, PTEN, PRLR, PAX8, RARA, PCSK5, APC	827	146	13588	1.68806	1	0.702617	67.2712
GOTERM_BP_FAT	GO:0001525~angiogenesis	14	0.118104	0.0609275	B4GALT1, ENPEP, CX3CL1, PTEN, SHB, ARHGAP22, EREG, ITGAV, CCBE1, HBEGF, PLCD1, TNFAIP2, SCG2, PITX2	827	133	13588	1.72952	1	0.70206	67.4677
GOTERM_BP_FAT	GO:0006090~pyruvate metabolic process	5	0.0421799	0.0619609	GPD2, GPD1, ALDOB, FBP1, FBP2	827	25	13588	3.28609	1	0.705841	68.1013
GOTERM_BP_FAT	GO:0008637~apoptotic mitochondrial changes	5	0.0421799	0.0619609	ATP7A, BAK1, MAP3K1, BCL2L1, PMAIP1	827	25	13588	3.28609	1	0.705841	68.1013
GOTERM_BP_FAT	GO:0010741~negative regulation of protein kinase cascade	5	0.0421799	0.0619609	SOCS2, IL1RL1, SOCS1, PTEN, APC	827	25	13588	3.28609	1	0.705841	68.1013
GOTERM_BP_FAT	GO:0006882~cellular zinc ion homeostasis	3	0.0253079	0.063199	SLC30A1, SLC39A4, ATP7B	827	7	13588	7.04163	1	0.710733	68.8451
GOTERM_BP_FAT	GO:0006857~oligopeptide transport	3	0.0253079	0.063199	SLC15A1, CDH17, SLCO3A1	827	7	13588	7.04163	1	0.710733	68.8451
GOTERM_BP_FAT	GO:0042953~lipoprotein transport	3	0.0253079	0.063199	CUBN, LSR, MTTP	827	7	13588	7.04163	1	0.710733	68.8451
GOTERM_BP_FAT	GO:0001504~neurotransmitter uptake	3	0.0253079	0.063199	SLC25A4, SLC22A3, CLN8	827	7	13588	7.04163	1	0.710733	68.8451
GOTERM_BP_FAT	GO:0043067~regulation of programmed cell death	44	0.371183	0.0675739	NUAK2, STK17B, CX3CL1, BCL2L1, PMAIP1, NR3C1, PNP, PTEN, CD74, ADA, ALDH1A1, BAK1, BAG4, NLRC4, TICAM1, TGM2, VNN1, BCL6, SKIL, ANGPTL4, APC, DHCR24, SCG2, IRAK2, B4GALT1, SGK3, ROCK1, TBX3, MADD, PIM1, CIDEB, GZMB, IDO1, HGF, CIDEC, ATP7A, NOTCH2, MSX1, UACA, TNFSF13B, PLCG2, HIPK2, APAF1, CLN8	827	560	13588	1.29097	1	0.732961	71.3443
GOTERM_BP_FAT	GO:0002250~adaptive immune response	10	0.0843597	0.0683536	CD55, CD8A, CFB, H2-AA, BCL6, CFI, C2, H2-DMA, CD74, DAF2	827	84	13588	1.95601	1	0.734776	71.7693
GOTERM_BP_FAT	GO:0002460~adaptive immune response based on somatic recombination of immune receptors built from immunoglobulin superfamily domains	10	0.0843597	0.0683536	CD55, CD8A, CFB, H2-AA, BCL6, CFI, C2, H2-DMA, CD74, DAF2	827	84	13588	1.95601	1	0.734776	71.7693
GOTERM_BP_FAT	GO:0030218~erythrocyte differentiation	7	0.0590518	0.0692738	ID2, MFSD7B, BCL6, HEPH, SFXN1, RB1, SOX6	827	48	13588	2.39611	1	0.737297	72.2632
GOTERM_BP_FAT	GO:0001836~release of cytochrome c from mitochondria	4	0.0337439	0.0693204	ATP7A, BAK1, BCL2L1, PMAIP1	827	16	13588	4.10762	1	0.735207	72.2881
GOTERM_BP_FAT	GO:0007586~digestion	5	0.0421799	0.0698529	ABCG8, MOGAT2, ABCG5, PNLIPRP2, SLC5A1	827	26	13588	3.15971	1	0.735676	72.5699
GOTERM_BP_FAT	GO:0001702~gastrulation with mouth forming second	5	0.0421799	0.0698529	NAT8, GATA4, CML5, PPAP2B, CML2	827	26	13588	3.15971	1	0.735676	72.5699
GOTERM_BP_FAT	GO:0051495~positive regulation of cytoskeleton organization	5	0.0421799	0.0698529	FMN1, MAP3K1, PROX1, APC, SYNPO	827	26	13588	3.15971	1	0.735676	72.5699
GOTERM_BP_FAT	GO:0008643~carbohydrate transport	8	0.0674878	0.0705101	PRKAG3, SLC2A7, SLC2A9, SLC35B1, SLC2A5, SORBS1, SLC5A4A, SLC5A1	827	60	13588	2.19073	1	0.736786	72.9141
GOTERM_BP_FAT	GO:0010941~regulation of cell death	44	0.371183	0.0711869	NUAK2, STK17B, CX3CL1, BCL2L1, PMAIP1, NR3C1, PNP, PTEN, CD74, ADA, ALDH1A1, BAK1, BAG4, NLRC4, TICAM1, TGM2, VNN1, BCL6, SKIL, ANGPTL4, APC, DHCR24, SCG2, IRAK2, B4GALT1, SGK3, ROCK1, TBX3, MADD, PIM1, CIDEB, GZMB, IDO1, HGF, CIDEC, ATP7A, NOTCH2, MSX1, UACA, TNFSF13B, PLCG2, HIPK2, APAF1, CLN8	827	563	13588	1.28409	1	0.737979	73.2642
GOTERM_BP_FAT	GO:0009309~amine biosynthetic process	9	0.0759237	0.0745979	ATP7A, CHDH, ALDH18A1, GOT1, NAGS, OTC, BHMT, AGMAT, PRODH	827	73	13588	2.02567	1	0.752659	74.9649
GOTERM_BP_FAT	GO:0043085~positive regulation of catalytic activity	23	0.194027	0.0750532	ALS2, IRAK2, DGKQ, MADD, GNA11, LPAR3, HGF, VAV2, CD74, ATP7A, BAK1, NLRC4, DAB1, UACA, EREG, ADCY9, SYDE1, GNB1, DGKD, MAP3K1, TGM2, PDGFC, APAF1	827	261	13588	1.4479	1	0.752623	75.184
GOTERM_BP_FAT	GO:0030879~mammary gland development	10	0.0843597	0.0768855	XDH, B4GALT1, IRS2, ARHGAP5, TBX3, SOCS2, PRLR, IRF6, NR3C1, ATP7B	827	86	13588	1.91052	1	0.759063	76.0476
GOTERM_BP_FAT	GO:0030036~actin cytoskeleton organization	16	0.134976	0.0772496	NUAK2, ROCK1, BCAR1, RHOU, PROX1, ESPN, CORO1C, FMN1, PPP1R9B, EPB4.1L3, SORBS1, RAC2, FAT1, TESK2, BCL6, PAFAH1B1	827	165	13588	1.59326	1	0.758572	76.2158
GOTERM_BP_FAT	GO:0032012~regulation of ARF protein signal transduction	6	0.0506158	0.0783375	GIT1, ADAP2, AGFG1, ASAP1, AGAP1, ADAP1	827	38	13588	2.59428	1	0.761401	76.7118
GOTERM_BP_FAT	GO:0042981~regulation of apoptosis	43	0.362747	0.0787515	NUAK2, STK17B, CX3CL1, BCL2L1, PMAIP1, NR3C1, PNP, PTEN, CD74, ADA, ALDH1A1, BAK1, BAG4, NLRC4, TICAM1, TGM2, VNN1, BCL6, SKIL, ANGPTL4, APC, DHCR24, SCG2, IRAK2, B4GALT1, SGK3, ROCK1, TBX3, MADD, PIM1, CIDEB, GZMB, IDO1, HGF, CIDEC, ATP7A, NOTCH2, MSX1, UACA, TNFSF13B, HIPK2, APAF1, CLN8	827	553	13588	1.2776	1	0.761135	76.898
GOTERM_BP_FAT	GO:0040007~growth	18	0.151847	0.0793289	PLAG1, WDTC1, BMP2, RXRA, BCL2L1, MREG, PTEN, NOTCH2, DSG4, APP, EREG, ADM, PRLR, MFSD7B, ZMIZ1, HBEGF, AKP3, PLEKHA1	827	193	13588	1.53238	1	0.761608	77.1553
GOTERM_BP_FAT	GO:0001817~regulation of cytokine production	14	0.118104	0.0802689	PANX1, TBK1, NDFIP1, IDO1, CX3CL1, H2-Q8, IFNAR1, DDX58, HSF1, EREG, RNF128, GATA4, TICAM1, BCL6	827	139	13588	1.65487	1	0.763688	77.5683
GOTERM_BP_FAT	GO:0046889~positive regulation of lipid biosynthetic process	3	0.0253079	0.0809485	SORBS1, MLXIPL, SEC14L2	827	8	13588	6.16143	1	0.764587	77.8626
GOTERM_BP_FAT	GO:0060670~branching involved in embryonic placenta morphogenesis	3	0.0253079	0.0809485	ADM, SOCS3, SPINT1	827	8	13588	6.16143	1	0.764587	77.8626
GOTERM_BP_FAT	GO:0015697~quaternary ammonium group transport	3	0.0253079	0.0809485	SLC22A4, SLC22A3, SLC22A5	827	8	13588	6.16143	1	0.764587	77.8626
GOTERM_BP_FAT	GO:0002252~immune effector process	13	0.109668	0.081371	CD8A, CFB, H2-Q8, CD74, CD47, CD55, TNFSF13B, TICAM1, H2-AA, C2, CFI, H2-DMA, DAF2	827	126	13588	1.69521	1	0.764355	78.0437
GOTERM_BP_FAT	GO:0048872~homeostasis of number of cells	12	0.101232	0.082051	BAK1, LIPA, ID2, TNFSF13B, MFSD7B, BCL6, HEPH, SFXN1, RB1, SOX6, SKIL, CD7	827	113	13588	1.74483	1	0.765243	78.3322
GOTERM_BP_FAT	GO:0016064~immunoglobulin mediated immune response	8	0.0674878	0.0866981	CD55, CFB, H2-AA, CFI, C2, H2-DMA, CD74, DAF2	827	63	13588	2.08641	1	0.782567	80.2102
GOTERM_BP_FAT	GO:0016101~diterpenoid metabolic process	5	0.0421799	0.0870903	RDH9, ALDH1A1, LRAT, RBP2, ALDH1A7	827	28	13588	2.93401	1	0.782142	80.3615
GOTERM_BP_FAT	GO:0008286~insulin receptor signaling pathway	5	0.0421799	0.0870903	IRS2, SORBS1, BCAR1, PIK3R2, NR1H3	827	28	13588	2.93401	1	0.782142	80.3615
GOTERM_BP_FAT	GO:0001523~retinoid metabolic process	5	0.0421799	0.0870903	RDH9, ALDH1A1, LRAT, RBP2, ALDH1A7	827	28	13588	2.93401	1	0.782142	80.3615
GOTERM_BP_FAT	GO:0034101~erythrocyte homeostasis	7	0.0590518	0.0875124	ID2, MFSD7B, BCL6, HEPH, SFXN1, RB1, SOX6	827	51	13588	2.25516	1	0.781841	80.5231
GOTERM_BP_FAT	GO:0008285~negative regulation of cell proliferation	20	0.168719	0.0887302	B4GALT1, BMP2, NDFIP1, RB1, IDO1, PMAIP1, PTEN, PROX1, KISS1, NOTCH2, MSX1, EREG, HSF1, CDKN2B, IRF6, BCL6, JAK2, ITCH, AXIN2, APC	827	224	13588	1.46701	1	0.784672	80.9822
GOTERM_BP_FAT	GO:0002683~negative regulation of immune system process	9	0.0759237	0.0896199	H2-BL, IL4RA, NDFIP1, BCL6, ITCH, IDO1, CD74, ADA, PAG1	827	76	13588	1.94571	1	0.786177	81.3112
GOTERM_BP_FAT	GO:0002449~lymphocyte mediated immunity	9	0.0759237	0.0896199	CD55, CD8A, CFB, H2-AA, CFI, C2, H2-DMA, CD74, DAF2	827	76	13588	1.94571	1	0.786177	81.3112
GOTERM_BP_FAT	GO:0001701~in utero embryonic development	23	0.194027	0.0901534	WDTC1, TBX3, SOCS3, MYO1E, PTPRR, SPINT1, BCL2L1, ADA, SLC34A2, MSX1, ADM, SERPINA1B, HSF1, SLC30A1, MFSD7B, ZMIZ1, GATA4, HBEGF, PLCD1, CDK11B, PRDM1, SKIL, PITX2	827	267	13588	1.41536	1	0.786296	81.5059
GOTERM_BP_FAT	GO:0031667~response to nutrient levels	12	0.101232	0.0902794	SOAT2, SUOX, ABCG5, ATG9A, NUAK2, CFB, GATA4, ALDOB, ADIPOR2, SLC22A3, LCT, ANGPTL4	827	115	13588	1.71448	1	0.784854	81.5516
GOTERM_BP_FAT	GO:0051146~striated muscle cell differentiation	10	0.0843597	0.0908507	ALS2, APP, BARX2, RXRA, GATA4, KY, RARA, RB1, PROX1, SNTA1	827	89	13588	1.84612	1	0.785125	81.7574
GOTERM_BP_FAT	GO:0048732~gland development	18	0.151847	0.0916046	XDH, PLAG1, B4GALT1, IRS2, TBX3, SOCS2, RXRA, NR3C1, FEM1B, PTEN, ARHGAP5, PRLR, IRF6, PAX8, TGM2, PITX1, PITX2, ATP7B	827	197	13588	1.50126	1	0.786085	82.0257
GOTERM_BP_FAT	GO:0042439~ethanolamine and derivative metabolic process	4	0.0337439	0.092433	CHKA, CHDH, LRAT, PCYT1A	827	18	13588	3.65122	1	0.787311	82.3163
GOTERM_BP_FAT	GO:0051250~negative regulation of lymphocyte activation	7	0.0590518	0.0941226	IL4RA, NDFIP1, BCL6, ITCH, IDO1, CD74, PAG1	827	52	13588	2.21179	1	0.791685	82.8953
GOTERM_BP_FAT	GO:0016477~cell migration	21	0.177155	0.0943635	B4GALT1, PLAT, SGPL1, EDN3, RET, PLXNA2, BCAR1, ITGA3, CX3CL1, ENPEP, VAV2, PTEN, ITGAM, CCL25, DAB1, DOCK1, LTB4R2, HBEGF, PAFAH1B1, APC, SCG2	827	240	13588	1.43767	1	0.79071	82.9763
GOTERM_BP_FAT	GO:0006721~terpenoid metabolic process	5	0.0421799	0.0964085	RDH9, ALDH1A1, LRAT, RBP2, ALDH1A7	827	29	13588	2.83284	1	0.796221	83.6501
GOTERM_BP_FAT	GO:0009110~vitamin biosynthetic process	5	0.0421799	0.0964085	RDH9, ALDH1A1, PDXK, RFK, NAPRT1	827	29	13588	2.83284	1	0.796221	83.6501
GOTERM_BP_FAT	GO:0009636~response to toxin	5	0.0421799	0.0964085	ATP7A, BAK1, CYP17A1, EPHX2, HTR1D	827	29	13588	2.83284	1	0.796221	83.6501
GOTERM_BP_FAT	GO:0042594~response to starvation	5	0.0421799	0.0964085	ATG9A, NUAK2, ALDOB, LCT, ANGPTL4	827	29	13588	2.83284	1	0.796221	83.6501
GOTERM_BP_FAT	GO:0033674~positive regulation of kinase activity	13	0.109668	0.0972112	IRAK2, ALS2, DGKQ, MADD, LPAR3, HGF, VAV2, CD74, DAB1, EREG, DGKD, MAP3K1, PDGFC	827	130	13588	1.64305	1	0.797234	83.9076
GOTERM_BP_FAT	GO:0019724~B cell mediated immunity	8	0.0674878	0.0985672	CD55, CFB, H2-AA, CFI, C2, H2-DMA, CD74, DAF2	827	65	13588	2.02221	1	0.800145	84.334
GOTERM_BP_FAT	GO:0042692~muscle cell differentiation	12	0.101232	0.0989916	ALS2, APP, BARX2, RXRA, GATA4, KY, RARA, RB1, SOX6, PROX1, PITX1, SNTA1	827	117	13588	1.68518	1	0.799819	84.4652
GOTERM_BP_FAT	GO:0051249~regulation of lymphocyte activation	14	0.118104	0.0990777	IL4RA, NDFIP1, IDO1, PNP, CD74, ADA, TNFSF13B, TICAM1, H2-AA, VNN1, BCL6, ITCH, H2-DMA, PAG1	827	144	13588	1.59741	1	0.798337	84.4917

## Sheet: GO.BP.colon.up
Table S2: GO Biological Process annotations for genes with higher expression in colonic IECs
Category	Term	Count	%	PValue	Genes	List Total	Pop Hits	Pop Total	Fold Enrichment	Bonferroni	Benjamini	FDR
GOTERM_BP_FAT	GO:0016042~lipid catabolic process	16	0.260374	7.01312e-05	LPL, PLA2G16, PLA2G10, ACER1, PLA2G4A, CYP39A1, AKR1C18, PRDX6, PLCH2, PLCD3, ASPG, LIPG, PAFAH1B3, PLA2G2C, SCARB1, PLA2G2F	477	134	13588	3.40136	0.139788	0.139788	0.121507
GOTERM_BP_FAT	GO:0006811~ion transport	46	0.748576	8.81193e-05	SLC5A3, STEAP3, STEAP4, SLC36A1, FXYD3, FXYD4, SLC20A1, ANO1, GRIK5, SFXN3, GRIN3A, ATP12A, FKBP1B, SFXN5, TRF, BEST2, CTTNBP2, SLC16A1, SPNB4, SLC24A3, WNK4, SLC39A8, KCNE2, SCNN1B, CHRNA1, SCNN1A, KCNE3, SLC8A1, PTGER3, TRPC7, KCTD1, SLC24A6, KCTD7, TST, SLC26A3, ATP2C2, TOMM40L, KCTD17, KCNF1, SLC41A1, PLLP, SLC40A1, SCARA5, STEAP1, PKDREJ, CACNA1B	477	712	13588	1.84041	0.172379	0.0902635	0.15265
GOTERM_BP_FAT	GO:0006826~iron ion transport	8	0.130187	9.73593e-05	STEAP3, STEAP4, SFXN3, STEAP1, SCARA5, SLC40A1, SFXN5, TRF	477	32	13588	7.12159	0.188638	0.067308	0.168644
GOTERM_BP_FAT	GO:0006486~protein amino acid glycosylation	12	0.195281	0.000327636	ST6GALNAC6, ST6GAL1, ST3GAL3, ST6GALNAC4, FUT9, B3GNT5, B3GALT5, B3GNT7, ST3GAL6, B3GNT6, FUT4, FUT2	477	91	13588	3.75644	0.505174	0.161287	0.566458
GOTERM_BP_FAT	GO:0070085~glycosylation	12	0.195281	0.000327636	ST6GALNAC6, ST6GAL1, ST3GAL3, ST6GALNAC4, FUT9, B3GNT5, B3GALT5, B3GNT7, ST3GAL6, B3GNT6, FUT4, FUT2	477	91	13588	3.75644	0.505174	0.161287	0.566458
GOTERM_BP_FAT	GO:0043413~biopolymer glycosylation	12	0.195281	0.000327636	ST6GALNAC6, ST6GAL1, ST3GAL3, ST6GALNAC4, FUT9, B3GNT5, B3GALT5, B3GNT7, ST3GAL6, B3GNT6, FUT4, FUT2	477	91	13588	3.75644	0.505174	0.161287	0.566458
GOTERM_BP_FAT	GO:0008610~lipid biosynthetic process	23	0.374288	0.000449771	GNE, UGT8A, FA2H, PIGYL, ACLY, LPCAT2, SIGMAR1, ACSM3, FAR1, CWH43, ST6GALNAC6, STARD5, AGPAT5, ST6GALNAC4, CYP39A1, LASS4, HMGCS2, B3GNT5, MBOAT1, SCARB1, AGPAT4, MECR, 2010111I01RIK	477	285	13588	2.2989	0.61935	0.175662	0.776846
GOTERM_BP_FAT	GO:0015674~di-, tri-valent inorganic cation transport	16	0.260374	0.000535153	STEAP3, STEAP4, SLC8A1, TRPC7, SFXN3, SLC24A6, GRIN3A, FKBP1B, TRF, SFXN5, ATP2C2, SLC24A3, STEAP1, SCARA5, SLC40A1, CACNA1B	477	161	13588	2.83094	0.683136	0.174319	0.923675
GOTERM_BP_FAT	GO:0042127~regulation of cell proliferation	35	0.569569	0.000657571	CAV2, RBP4, FGFR4, FGF15, IL18, IFITM3, PPARG, HOXD13, TNFSF13, TLR4, ZBTB16, TNFSF12, TIMP2, SOX9, IL34, MIF, CTTNBP2, CD9, KISS1R, HOXA3, PLCD3, CALCRL, FGF1, ETV4, KLB, ANXA1, SIX5, ESR2, IRS1, CLEC11A, HES1, SMO, PLA2G4A, NUPR1, SERPINB5, FOXE3	477	538	13588	1.8532	0.75641	0.182703	1.13384
GOTERM_BP_FAT	GO:0000041~transition metal ion transport	10	0.162734	0.000717376	STEAP3, STEAP4, TRPC7, SLC39A8, SFXN3, STEAP1, SCARA5, SLC40A1, SFXN5, TRF	477	70	13588	4.06948	0.785782	0.175184	1.23635
GOTERM_BP_FAT	GO:0009101~glycoprotein biosynthetic process	13	0.211554	0.000812264	ST6GAL1, FUT9, B3GALT5, ST6GALNAC6, ST3GAL3, ST6GALNAC4, B3GNT5, B3GNT7, B3GNT6, ST3GAL6, FUT4, A4GNT, FUT2	477	117	13588	3.16515	0.825292	0.176218	1.3988
GOTERM_BP_FAT	GO:0006869~lipid transport	13	0.211554	0.000944332	RBP4, SLC27A1, PLA2G10, PPARG, ANXA1, ATP11A, SIGMAR1, STARD5, BRDT, SCARB1, APOL6, VLDLR, ATP8A1	477	119	13588	3.11196	0.868459	0.183594	1.62449
GOTERM_BP_FAT	GO:0032760~positive regulation of tumor necrosis factor production	5	0.081367	0.00149195	NOD2, NOD1, TLR2, TLR4, CD14	477	15	13588	9.49546	0.959466	0.252798	2.5551
GOTERM_BP_FAT	GO:0006643~membrane lipid metabolic process	9	0.146461	0.00169047	CLN3, ST6GALNAC6, PLA2G15, ST6GALNAC4, LASS4, B3GNT5, UGT8A, FA2H, ACER1	477	64	13588	4.0059	0.97355	0.261186	2.89041
GOTERM_BP_FAT	GO:0010876~lipid localization	13	0.211554	0.00178	RBP4, SLC27A1, PLA2G10, PPARG, ANXA1, ATP11A, SIGMAR1, STARD5, BRDT, SCARB1, APOL6, VLDLR, ATP8A1	477	128	13588	2.89315	0.978183	0.254899	3.04127
GOTERM_BP_FAT	GO:0009100~glycoprotein metabolic process	14	0.227828	0.00197859	CLN3, ST6GAL1, FUT9, B3GALT5, ST6GALNAC6, ST3GAL3, ST6GALNAC4, B3GNT5, B3GNT7, ST3GAL6, B3GNT6, FUT4, A4GNT, FUT2	477	147	13588	2.71299	0.985768	0.261941	3.37513
GOTERM_BP_FAT	GO:0046903~secretion	18	0.292921	0.00201167	STEAP3, SCAMP1, PTGER3, IL1RN, SYT8, ANXA1, FKBP1B, IRS1, RIMS4, LY6E, SYCN, NTRK2, SYN2, AGR2, SYTL1, CAR2, SLC17A9, CACNA1B	477	221	13588	2.32016	0.986745	0.250409	3.43064
GOTERM_BP_FAT	GO:0032680~regulation of tumor necrosis factor production	6	0.0976404	0.00220171	NOD2, NOD1, TLR1, TLR2, TLR4, CD14	477	27	13588	6.33031	0.991194	0.256039	3.74891
GOTERM_BP_FAT	GO:0030001~metal ion transport	28	0.455655	0.00361098	STEAP3, SLC5A3, STEAP4, SFXN3, GRIN3A, ATP12A, FKBP1B, SFXN5, TRF, SPNB4, SLC24A3, SLC39A8, KCNE2, SCNN1B, SCNN1A, KCNE3, SLC8A1, TRPC7, KCTD1, SLC24A6, KCTD7, ATP2C2, KCTD17, KCNF1, SLC40A1, SCARA5, STEAP1, CACNA1B	477	442	13588	1.80457	0.999576	0.366738	6.07858
GOTERM_BP_FAT	GO:0032675~regulation of interleukin-6 production	6	0.0976404	0.0047575	NOD2, NOD1, TLR1, TLR2, TLR4, TLR6	477	32	13588	5.34119	0.999964	0.433806	7.93459
GOTERM_BP_FAT	GO:0006928~cell motion	24	0.390561	0.00519251	NRP2, SATB2, PLXNA3, NRP1, VAV3, FGF15, PLA2G10, GJA1, PF4, ESR2, MMP14, EPHB3, CDH4, CTTNBP2, CD9, SMO, HOXA2, DNAHC5, SEMA3F, SCARB1, SCNN1B, BOC, SRGAP1, ETV4	477	367	13588	1.86287	0.999986	0.444719	8.62969
GOTERM_BP_FAT	GO:0009595~detection of biotic stimulus	4	0.0650936	0.00571255	NOD2, NOD1, TLR1, TLR4	477	11	13588	10.3587	0.999995	0.45936	9.4542
GOTERM_BP_FAT	GO:0006665~sphingolipid metabolic process	8	0.130187	0.00576993	CLN3, ST6GALNAC6, PLA2G15, ST6GALNAC4, LASS4, B3GNT5, FA2H, ACER1	477	62	13588	3.67566	0.999996	0.446567	9.54474
GOTERM_BP_FAT	GO:0055085~transmembrane transport	28	0.455655	0.00616024	SLC45A3, SLC5A3, SLC2A13, RBP4, SFXN3, AQP4, SFXN5, SLC2A6, SLC16A1, SLC24A3, SLC2A1, SLC39A8, SCARB1, SLC25A40, SLC43A3, RANBP17, SLC8A1, TRPC7, SLC24A6, SLC26A3, SLC16A9, SLC37A2, TOMM40L, ABCC3, KCNF1, ABCC1, SCARA5, CACNA1B	477	460	13588	1.73395	0.999998	0.452856	10.1584
GOTERM_BP_FAT	GO:0007267~cell-cell signaling	20	0.325468	0.00665207	CLN3, FGFR4, IL1RN, GRIK5, FZD1, GJA1, CELSR1, FKBP1B, IRS1, CTTNBP2, SMO, GAD2, LYNX1, HNMT, NTRK2, SYN2, CHRNA1, FGF1, WNT8B, CACNA1B	477	290	13588	1.96458	0.999999	0.463683	10.926
GOTERM_BP_FAT	GO:0048843~negative regulation of axon extension involved in axon guidance	3	0.0488202	0.0070107	PLXNA3, NRP1, SEMA3F	477	4	13588	21.3648	1	0.467075	11.4819
GOTERM_BP_FAT	GO:0032490~detection of molecule of bacterial origin	3	0.0488202	0.0070107	NOD2, TLR1, TLR4	477	4	13588	21.3648	1	0.467075	11.4819
GOTERM_BP_FAT	GO:0050919~negative chemotaxis	3	0.0488202	0.0070107	NRP2, PLXNA3, SEMA3F	477	4	13588	21.3648	1	0.467075	11.4819
GOTERM_BP_FAT	GO:0048841~regulation of axon extension involved in axon guidance	3	0.0488202	0.0070107	PLXNA3, NRP1, SEMA3F	477	4	13588	21.3648	1	0.467075	11.4819
GOTERM_BP_FAT	GO:0055114~oxidation reduction	37	0.602116	0.00734336	STEAP3, CYP2D9, LDHB, STEAP4, CYP2D10, CYP2F2, CYP2C69, BC026585, FAR1, NPHP3, UQCR10, TDO2, CBR1, CYP39A1, CBR2, IVD, ADH1, CYP2C55, PYROXD2, FA2H, BCKDHB, ALDH3B2, CBR3, GMPR, CYP2B10, MSRB2, AKR1B8, PYCR2, NXN, PRDX6, AKR1B3, AKR1C18, HAO2, SLC37A2, HSD11B2, MECR, STEAP1	477	672	13588	1.56845	1	0.46899	11.9945
GOTERM_BP_FAT	GO:0009952~anterior/posterior pattern formation	13	0.211554	0.00757903	FOXA2, HOXD13, ZBTB16, TCF7L1, HOXD9, HES1, HOXA2, HOXA3, HOXA5, HOXA6, HOXA7, HOXA10, HOXA9	477	153	13588	2.42041	1	0.466468	12.356
GOTERM_BP_FAT	GO:0046467~membrane lipid biosynthetic process	5	0.081367	0.00775478	ST6GALNAC6, ST6GALNAC4, LASS4, B3GNT5, UGT8A	477	23	13588	6.19269	1	0.461545	12.6247
GOTERM_BP_FAT	GO:0006672~ceramide metabolic process	6	0.0976404	0.00794397	CLN3, ST6GALNAC6, PLA2G15, ST6GALNAC4, LASS4, ACER1	477	36	13588	4.74773	1	0.457499	12.9131
GOTERM_BP_FAT	GO:0006812~cation transport	30	0.488202	0.00829054	STEAP3, SLC5A3, STEAP4, SLC36A1, SFXN3, GRIN3A, ATP12A, FKBP1B, SFXN5, TRF, SPNB4, SLC24A3, SLC39A8, KCNE2, SCNN1B, SCNN1A, KCNE3, SLC8A1, TRPC7, KCTD1, SLC24A6, KCTD7, ATP2C2, KCTD17, SLC41A1, KCNF1, SLC40A1, SCARA5, STEAP1, CACNA1B	477	515	13588	1.6594	1	0.460085	13.439
GOTERM_BP_FAT	GO:0048706~embryonic skeletal system development	9	0.146461	0.00847437	HOXD9, RBP4, HOXA2, SATB2, HOXA3, HOXA5, HOXA6, HOXA7, HOXA9	477	83	13588	3.08888	1	0.456142	13.7167
GOTERM_BP_FAT	GO:0019637~organophosphate metabolic process	14	0.227828	0.00907223	CLN3, PLA2G10, PIGYL, LPCAT2, CWH43, PLA2G4A, AGPAT5, PLCH2, SLC37A2, ASPG, MBOAT1, PLA2G2C, AGPAT4, PLA2G2F	477	176	13588	2.26596	1	0.468043	14.6142
GOTERM_BP_FAT	GO:0048732~gland development	15	0.244101	0.0095791	NRP1, HOXD13, HOXB13, ESR2, SOX9, IRS1, HOXD9, HES1, CTTNBP2, HOXA3, LY6E, HOXA5, SERPINB5, HOXA9, ETV4	477	197	13588	2.16901	1	0.475755	15.3682
GOTERM_BP_FAT	GO:0046519~sphingoid metabolic process	6	0.0976404	0.00999079	CLN3, ST6GALNAC6, PLA2G15, ST6GALNAC4, LASS4, ACER1	477	38	13588	4.49785	1	0.479662	15.976
GOTERM_BP_FAT	GO:0006006~glucose metabolic process	12	0.195281	0.010205	LDHB, RBP4, G6PC, PPP1R3B, PFKL, PPP1R1A, HK1, ENO3, NPY1R, DLAT, G6PC3, PYGB	477	140	13588	2.44169	1	0.476766	16.2906
GOTERM_BP_FAT	GO:0046394~carboxylic acid biosynthetic process	12	0.195281	0.0107319	ACSM3, FAR1, GLUL, PYCR2, CYP39A1, ASS1, MAT2A, FA2H, LIPT2, MECR, 2010111I01RIK, CBS	477	141	13588	2.42437	1	0.484121	17.0597
GOTERM_BP_FAT	GO:0016053~organic acid biosynthetic process	12	0.195281	0.0107319	ACSM3, FAR1, GLUL, PYCR2, CYP39A1, ASS1, MAT2A, FA2H, LIPT2, MECR, 2010111I01RIK, CBS	477	141	13588	2.42437	1	0.484121	17.0597
GOTERM_BP_FAT	GO:0007389~pattern specification process	19	0.309194	0.0112472	SATB2, NRP1, FOXA2, EVX1, DYNC2LI1, HOXD12, HOXD13, ZBTB16, TCF7L1, HOXD9, HES1, SMO, HOXA2, HOXA3, HOXA5, HOXA6, HOXA7, HOXA10, HOXA9	477	284	13588	1.90578	1	0.490624	17.8054
GOTERM_BP_FAT	GO:0070391~response to lipoteichoic acid	3	0.0488202	0.0114143	TLR2, TLR4, CD14	477	5	13588	17.0918	1	0.486317	18.046
GOTERM_BP_FAT	GO:0032874~positive regulation of stress-activated MAPK cascade	3	0.0488202	0.0114143	NOD2, NOD1, TLR4	477	5	13588	17.0918	1	0.486317	18.046
GOTERM_BP_FAT	GO:0006644~phospholipid metabolic process	13	0.211554	0.0122079	CLN3, PLA2G10, PIGYL, LPCAT2, CWH43, PLA2G4A, AGPAT5, PLCH2, ASPG, MBOAT1, PLA2G2C, AGPAT4, PLA2G2F	477	163	13588	2.27192	1	0.500421	19.179
GOTERM_BP_FAT	GO:0045087~innate immune response	10	0.162734	0.0127459	IL1R1, TMEM173, NOD2, IL1RL2, TLR1, TLR2, TLR4, TLR6, CD1D1, MIF	477	107	13588	2.66228	1	0.506477	19.9387
GOTERM_BP_FAT	GO:0060512~prostate gland morphogenesis	5	0.081367	0.0137693	SERPINB5, HOXD13, HOXB13, ESR2, SOX9	477	27	13588	5.27525	1	0.524888	21.3654
GOTERM_BP_FAT	GO:0032940~secretion by cell	14	0.227828	0.0139637	STEAP3, SCAMP1, IL1RN, SYT8, FKBP1B, IRS1, RIMS4, LY6E, SYCN, NTRK2, SYN2, SYTL1, SLC17A9, CACNA1B	477	186	13588	2.14414	1	0.521154	21.6336
GOTERM_BP_FAT	GO:0007155~cell adhesion	31	0.504475	0.0143031	NRP2, CLDN8, NRP1, ZAN, COL28A1, SOX9, CDH4, CLDN14, MIA1, PVRL4, AZGP1, CD9, SCARB1, CNTNAP1, COL8A1, CDH26, THBS1, SPON2, BOC, THBS4, CDHR1, PTPRS, PTPRU, CELSR1, PCDH17, COL16A1, MUC4, HES1, TMEM8B, ITGA5, PARVA	477	561	13588	1.57411	1	0.521185	22.0999
GOTERM_BP_FAT	GO:0022610~biological adhesion	31	0.504475	0.0146203	NRP2, CLDN8, NRP1, ZAN, COL28A1, SOX9, CDH4, CLDN14, MIA1, PVRL4, AZGP1, CD9, SCARB1, CNTNAP1, COL8A1, CDH26, THBS1, SPON2, BOC, THBS4, CDHR1, PTPRS, PTPRU, CELSR1, PCDH17, COL16A1, MUC4, HES1, TMEM8B, ITGA5, PARVA	477	562	13588	1.57131	1	0.520679	22.5333
GOTERM_BP_FAT	GO:0051960~regulation of nervous system development	12	0.195281	0.0150251	HES1, SMO, PLXNA3, HOXA2, NRP1, FOXA2, SEMA3F, NTRK2, TIMP2, CDH4, TRF, MT3	477	148	13588	2.30971	1	0.522275	23.0832
GOTERM_BP_FAT	GO:0019318~hexose metabolic process	13	0.211554	0.0158775	LDHB, RBP4, PFKL, HK1, DLAT, NPY1R, PMM1, G6PC3, G6PC, PPP1R3B, PPP1R1A, ENO3, PYGB	477	169	13588	2.19126	1	0.534019	24.229
GOTERM_BP_FAT	GO:0043408~regulation of MAPKKK cascade	9	0.146461	0.0162025	NOD2, NOD1, KLB, EDA2R, TLR4, TLR6, TIMP2, NENF, CBS	477	93	13588	2.75675	1	0.533468	24.6616
GOTERM_BP_FAT	GO:0032872~regulation of stress-activated MAPK cascade	3	0.0488202	0.0167268	NOD2, NOD1, TLR4	477	6	13588	14.2432	1	0.537244	25.3545
GOTERM_BP_FAT	GO:0043551~regulation of phosphoinositide 3-kinase activity	3	0.0488202	0.0167268	VAV3, KLK1B4, IRS1	477	6	13588	14.2432	1	0.537244	25.3545
GOTERM_BP_FAT	GO:0006085~acetyl-CoA biosynthetic process	3	0.0488202	0.0167268	ACLY, DLAT, ACSS2	477	6	13588	14.2432	1	0.537244	25.3545
GOTERM_BP_FAT	GO:0043552~positive regulation of phosphoinositide 3-kinase activity	3	0.0488202	0.0167268	VAV3, KLK1B4, IRS1	477	6	13588	14.2432	1	0.537244	25.3545
GOTERM_BP_FAT	GO:0001708~cell fate specification	7	0.113914	0.0168227	SMO, FGFR4, PRDM14, EVX1, FOXA2, SOX9, FGF1	477	59	13588	3.37974	1	0.531804	25.4808
GOTERM_BP_FAT	GO:0046330~positive regulation of JNK cascade	4	0.0650936	0.017026	NOD2, NOD1, EDA2R, TLR4	477	16	13588	7.12159	1	0.528785	25.7474
GOTERM_BP_FAT	GO:0070304~positive regulation of stress-activated protein kinase signaling pathway	4	0.0650936	0.017026	NOD2, NOD1, EDA2R, TLR4	477	16	13588	7.12159	1	0.528785	25.7474
GOTERM_BP_FAT	GO:0030516~regulation of axon extension	4	0.0650936	0.017026	PLXNA3, NRP1, SEMA3F, CDH4	477	16	13588	7.12159	1	0.528785	25.7474
GOTERM_BP_FAT	GO:0005996~monosaccharide metabolic process	14	0.227828	0.0170657	LDHB, RBP4, PFKL, GNE, HK1, DLAT, NPY1R, G6PC3, PMM1, G6PC, PPP1R3B, PPP1R1A, ENO3, PYGB	477	191	13588	2.08801	1	0.522469	25.7994
GOTERM_BP_FAT	GO:0050767~regulation of neurogenesis	11	0.179007	0.0176387	HES1, SMO, PLXNA3, HOXA2, NRP1, FOXA2, SEMA3F, NTRK2, TIMP2, CDH4, MT3	477	132	13588	2.37386	1	0.527247	26.5456
GOTERM_BP_FAT	GO:0008643~carbohydrate transport	7	0.113914	0.0181575	SLC2A13, SLC2A6, G6PC, SLC37A2, SLC2A1, SLC35A1, G6PC3	477	60	13588	3.32341	1	0.530734	27.2153
GOTERM_BP_FAT	GO:0003002~regionalization	15	0.244101	0.0185082	FOXA2, EVX1, HOXD13, ZBTB16, TCF7L1, HOXD9, HES1, SMO, HOXA2, HOXA3, HOXA5, HOXA6, HOXA7, HOXA10, HOXA9	477	214	13588	1.99671	1	0.530826	27.6646
GOTERM_BP_FAT	GO:0046328~regulation of JNK cascade	6	0.0976404	0.0199377	NOD2, NOD1, EDA2R, TLR4, TLR6, CBS	477	45	13588	3.79818	1	0.550992	29.4694
GOTERM_BP_FAT	GO:0009611~response to wounding	21	0.341741	0.0202755	PTGER3, GATM, PPARG, TLR1, TLR2, GJA1, CHST4, TLR4, PF4, ANXA5, TLR6, TRF, MIF, NOD2, ANXA8, NUPR1, SAA1, F3, SCNN1B, THBS1, CD14	477	347	13588	1.72396	1	0.550498	29.8896
GOTERM_BP_FAT	GO:0070302~regulation of stress-activated protein kinase signaling pathway	6	0.0976404	0.0217459	NOD2, NOD1, EDA2R, TLR4, TLR6, CBS	477	46	13588	3.71561	1	0.569548	31.6916
GOTERM_BP_FAT	GO:0046942~carboxylic acid transport	9	0.146461	0.0227636	SLC1A4, CLN3, SLC27A1, SLC1A5, SLC36A1, PPARG, ABCC3, ANXA1, SLC6A14	477	99	13588	2.58967	1	0.579931	32.913
GOTERM_BP_FAT	GO:0045410~positive regulation of interleukin-6 biosynthetic process	3	0.0488202	0.0228792	TLR1, TLR4, TLR6	477	7	13588	12.2084	1	0.575466	33.0505
GOTERM_BP_FAT	GO:0007250~activation of NF-kappaB-inducing kinase activity	3	0.0488202	0.0228792	TLR1, TLR4, TLR6	477	7	13588	12.2084	1	0.575466	33.0505
GOTERM_BP_FAT	GO:0015909~long-chain fatty acid transport	3	0.0488202	0.0228792	SLC27A1, PPARG, ANXA1	477	7	13588	12.2084	1	0.575466	33.0505
GOTERM_BP_FAT	GO:0016045~detection of bacterium	3	0.0488202	0.0228792	NOD2, NOD1, TLR1	477	7	13588	12.2084	1	0.575466	33.0505
GOTERM_BP_FAT	GO:0001501~skeletal system development	18	0.292921	0.0229555	RBP4, SATB2, HOXD12, HOXD13, ZBTB16, SOX9, MMP14, HOXD9, SMO, HOXA2, HOXA3, HOXA5, HOXA6, KAZALD1, HOXA7, HOXA10, HOXA9, CBS	477	285	13588	1.79914	1	0.570479	33.1411
GOTERM_BP_FAT	GO:0032755~positive regulation of interleukin-6 production	4	0.0650936	0.0235612	NOD2, NOD1, TLR2, TLR4	477	18	13588	6.33031	1	0.573945	33.8559
GOTERM_BP_FAT	GO:0043410~positive regulation of MAPKKK cascade	6	0.0976404	0.0236575	NOD2, NOD1, KLB, EDA2R, TLR4, NENF	477	47	13588	3.63656	1	0.569442	33.9689
GOTERM_BP_FAT	GO:0015849~organic acid transport	9	0.146461	0.0240155	SLC1A4, CLN3, SLC27A1, SLC1A5, SLC36A1, PPARG, ABCC3, ANXA1, SLC6A14	477	100	13588	2.56377	1	0.569059	34.3875
GOTERM_BP_FAT	GO:0048704~embryonic skeletal system morphogenesis	7	0.113914	0.0242193	HOXD9, HOXA2, SATB2, HOXA3, HOXA5, HOXA6, HOXA7	477	64	13588	3.1157	1	0.566359	34.6246
GOTERM_BP_FAT	GO:0001666~response to hypoxia	7	0.113914	0.0242193	IL18, HIF3A, MMP14, CAPN2, SCNN1B, TRF, MT3	477	64	13588	3.1157	1	0.566359	34.6246
GOTERM_BP_FAT	GO:0060284~regulation of cell development	12	0.195281	0.0242214	HES1, SMO, PLXNA3, HOXA2, NRP1, FOXA2, SEMA3F, NTRK2, TIMP2, CDH4, BOC, MT3	477	159	13588	2.14991	1	0.560692	34.627
GOTERM_BP_FAT	GO:0070482~response to oxygen levels	7	0.113914	0.0259227	IL18, HIF3A, MMP14, CAPN2, SCNN1B, TRF, MT3	477	65	13588	3.06776	1	0.580016	36.575
GOTERM_BP_FAT	GO:0060341~regulation of cellular localization	12	0.195281	0.0262569	GCG, SMO, RBP4, ICA1, NOD2, OIT1, PFKL, NTRK2, GRIK5, CELSR1, PKIA, FKBP1B	477	161	13588	2.12321	1	0.579184	36.9512
GOTERM_BP_FAT	GO:0042325~regulation of phosphorylation	18	0.292921	0.026535	VAV3, KLK1B4, TLR1, TLR4, DGKH, IL34, TLR6, PKIA, IRS1, SPRY4, NOD2, DOK7, ERN2, RAPGEF3, FGF1, FAM129A, CBS, VLDLR	477	290	13588	1.76812	1	0.577595	37.2626
GOTERM_BP_FAT	GO:0045596~negative regulation of cell differentiation	13	0.211554	0.026619	PLXNA3, NRP1, FOXA2, CCDC85B, PF4, ZBTB16, SOX9, HES1, NPHP3, HOXA2, SEMA3F, HOXA7, MT3	477	182	13588	2.03474	1	0.573373	37.3564
GOTERM_BP_FAT	GO:0045664~regulation of neuron differentiation	9	0.146461	0.0266629	HES1, PLXNA3, HOXA2, NRP1, FOXA2, SEMA3F, NTRK2, TIMP2, CDH4	477	102	13588	2.5135	1	0.568678	37.4053
GOTERM_BP_FAT	GO:0014033~neural crest cell differentiation	5	0.081367	0.0272547	NRP2, SMO, FGF15, SEMA3F, SOX9	477	33	13588	4.31612	1	0.571534	38.0619
GOTERM_BP_FAT	GO:0014032~neural crest cell development	5	0.081367	0.0272547	NRP2, SMO, FGF15, SEMA3F, SOX9	477	33	13588	4.31612	1	0.571534	38.0619
GOTERM_BP_FAT	GO:0015718~monocarboxylic acid transport	4	0.0650936	0.0272681	SLC27A1, PPARG, ABCC3, ANXA1	477	19	13588	5.99713	1	0.566568	38.0766
GOTERM_BP_FAT	GO:0070374~positive regulation of ERK1 and ERK2 cascade	3	0.0488202	0.0298065	NOD2, NOD1, TLR4	477	8	13588	10.6824	1	0.594377	40.8191
GOTERM_BP_FAT	GO:0009247~glycolipid biosynthetic process	3	0.0488202	0.0298065	ST6GALNAC6, ST6GALNAC4, UGT8A	477	8	13588	10.6824	1	0.594377	40.8191
GOTERM_BP_FAT	GO:0002685~regulation of leukocyte migration	3	0.0488202	0.0298065	NOD2, TLR2, THBS1	477	8	13588	10.6824	1	0.594377	40.8191
GOTERM_BP_FAT	GO:0043550~regulation of lipid kinase activity	3	0.0488202	0.0298065	VAV3, KLK1B4, IRS1	477	8	13588	10.6824	1	0.594377	40.8191
GOTERM_BP_FAT	GO:0030517~negative regulation of axon extension	3	0.0488202	0.0298065	PLXNA3, NRP1, SEMA3F	477	8	13588	10.6824	1	0.594377	40.8191
GOTERM_BP_FAT	GO:0060485~mesenchyme development	6	0.0976404	0.0300295	NRP2, SMO, FGF15, HOXA5, SEMA3F, SOX9	477	50	13588	3.41836	1	0.592099	41.0544
GOTERM_BP_FAT	GO:0046928~regulation of neurotransmitter secretion	4	0.0650936	0.0312666	ICA1, NTRK2, GRIK5, CELSR1	477	20	13588	5.69727	1	0.602134	42.3442
GOTERM_BP_FAT	GO:0006917~induction of apoptosis	12	0.195281	0.0331034	BNIPL, UTP11L, NOD1, NUPR1, CASP14, IL18, LGALS12, ERN2, NR4A1, BIK, PHLDA3, DAPK1	477	167	13588	2.04693	1	0.618514	44.2103
GOTERM_BP_FAT	GO:0012502~induction of programmed cell death	12	0.195281	0.0331034	BNIPL, UTP11L, NOD1, NUPR1, CASP14, IL18, LGALS12, ERN2, NR4A1, BIK, PHLDA3, DAPK1	477	167	13588	2.04693	1	0.618514	44.2103
GOTERM_BP_FAT	GO:0051270~regulation of cell motion	9	0.146461	0.034153	KISS1R, PLXNA3, NOD2, NRP1, SEMA3F, TLR2, NEXN, THBS1, IRS1	477	107	13588	2.39605	1	0.62532	45.2509
GOTERM_BP_FAT	GO:0030148~sphingolipid biosynthetic process	4	0.0650936	0.0355546	ST6GALNAC6, ST6GALNAC4, LASS4, B3GNT5	477	21	13588	5.42598	1	0.635572	46.612
GOTERM_BP_FAT	GO:0040008~regulation of growth	16	0.260374	0.0358739	RBP4, PLXNA3, NRP1, CCDC85B, TLR2, HOXB13, NPY1R, CDH4, GAS6, NOV, AZGP1, NOD2, SPNB4, TMEM8B, SEMA3F, KAZALD1	477	256	13588	1.7804	1	0.634175	46.9175
GOTERM_BP_FAT	GO:0019220~regulation of phosphate metabolic process	18	0.292921	0.0361126	VAV3, KLK1B4, TLR1, TLR4, DGKH, IL34, TLR6, PKIA, IRS1, SPRY4, NOD2, DOK7, ERN2, RAPGEF3, FGF1, FAM129A, CBS, VLDLR	477	301	13588	1.7035	1	0.631973	47.1449
GOTERM_BP_FAT	GO:0051174~regulation of phosphorus metabolic process	18	0.292921	0.0361126	VAV3, KLK1B4, TLR1, TLR4, DGKH, IL34, TLR6, PKIA, IRS1, SPRY4, NOD2, DOK7, ERN2, RAPGEF3, FGF1, FAM129A, CBS, VLDLR	477	301	13588	1.7035	1	0.631973	47.1449
GOTERM_BP_FAT	GO:0006706~steroid catabolic process	3	0.0488202	0.0374472	CYP39A1, AKR1C18, SCARB1	477	9	13588	9.49546	1	0.640948	48.3993
GOTERM_BP_FAT	GO:0007169~transmembrane receptor protein tyrosine kinase signaling pathway	13	0.211554	0.0379192	FGFR4, NRP1, FGF15, KLB, GRIK5, EPHB3, IRS1, EPHB6, UTP11L, DOK7, NTRK2, ROR1, FGF1	477	192	13588	1.92876	1	0.641077	48.8363
GOTERM_BP_FAT	GO:0048638~regulation of developmental growth	5	0.081367	0.0394693	RBP4, PLXNA3, NRP1, SEMA3F, CDH4	477	37	13588	3.84951	1	0.651588	50.2467
GOTERM_BP_FAT	GO:0051259~protein oligomerization	7	0.113914	0.0400867	CAV2, NOD2, CBR2, TGM3, PRNP, ANXA5, SCARA5	477	72	13588	2.76951	1	0.652954	50.7981
GOTERM_BP_FAT	GO:0006664~glycolipid metabolic process	4	0.0650936	0.0401287	CLN3, ST6GALNAC6, ST6GALNAC4, UGT8A	477	22	13588	5.17934	1	0.648947	50.8355
GOTERM_BP_FAT	GO:0009749~response to glucose stimulus	4	0.0650936	0.0401287	GLUL, PFKL, EIF2B1, FKBP1B	477	22	13588	5.17934	1	0.648947	50.8355
GOTERM_BP_FAT	GO:0051588~regulation of neurotransmitter transport	4	0.0650936	0.0401287	ICA1, NTRK2, GRIK5, CELSR1	477	22	13588	5.17934	1	0.648947	50.8355
GOTERM_BP_FAT	GO:0009746~response to hexose stimulus	4	0.0650936	0.0401287	GLUL, PFKL, EIF2B1, FKBP1B	477	22	13588	5.17934	1	0.648947	50.8355
GOTERM_BP_FAT	GO:0034284~response to monosaccharide stimulus	4	0.0650936	0.0401287	GLUL, PFKL, EIF2B1, FKBP1B	477	22	13588	5.17934	1	0.648947	50.8355
GOTERM_BP_FAT	GO:0016477~cell migration	15	0.244101	0.0429703	NRP2, SATB2, VAV3, NRP1, FGF15, GJA1, PF4, ESR2, MMP14, SMO, CTTNBP2, SEMA3F, SCARB1, SCNN1B, SRGAP1	477	240	13588	1.7804	1	0.67024	53.2985
GOTERM_BP_FAT	GO:0001755~neural crest cell migration	4	0.0650936	0.0449848	NRP2, SMO, FGF15, SEMA3F	477	23	13588	4.95415	1	0.683077	54.9737
GOTERM_BP_FAT	GO:0048640~negative regulation of developmental growth	3	0.0488202	0.0457428	PLXNA3, NRP1, SEMA3F	477	10	13588	8.54591	1	0.685094	55.5892
GOTERM_BP_FAT	GO:0002070~epithelial cell maturation	3	0.0488202	0.0457428	GJA1, HOXB13, ESR2	477	10	13588	8.54591	1	0.685094	55.5892
GOTERM_BP_FAT	GO:0070372~regulation of ERK1 and ERK2 cascade	3	0.0488202	0.0457428	NOD2, NOD1, TLR4	477	10	13588	8.54591	1	0.685094	55.5892
GOTERM_BP_FAT	GO:0030850~prostate gland development	5	0.081367	0.0465716	SERPINB5, HOXD13, HOXB13, ESR2, SOX9	477	39	13588	3.6521	1	0.687625	56.2531
GOTERM_BP_FAT	GO:0080135~regulation of cellular response to stress	7	0.113914	0.0474085	CLN3, NOD2, NOD1, EDA2R, TLR4, TLR6, CBS	477	75	13588	2.65873	1	0.690148	56.9141
GOTERM_BP_FAT	GO:0010033~response to organic substance	26	0.423108	0.0524448	SLC27A1, RBP4, TLR1, PPARG, TLR2, TLR4, FKBP1B, TRF, CTTNBP2, NOD2, ADH1, CREB3L1, CREB3L4, BOC, PFKL, GATM, MAT2A, EPHX1, ANXA5, MMP14, EIF2B1, IRS1, GLUL, HMGCS2, ERN2, CD14	477	505	13588	1.46663	1	0.723378	60.697
GOTERM_BP_FAT	GO:0006954~inflammatory response	14	0.227828	0.0530544	PTGER3, TLR1, PPARG, TLR2, CHST4, TLR4, TLR6, TRF, MIF, NOD2, NUPR1, SAA1, THBS1, CD14	477	225	13588	1.77249	1	0.723671	61.133
GOTERM_BP_FAT	GO:0060429~epithelium development	16	0.260374	0.0534822	NRP1, FOXA2, PPARG, FZD1, HOXD13, HOXB13, GJA1, ESR2, CELSR1, SOX9, SCEL, HOXA5, SERPINB5, TGM3, ETV4, CAR2	477	271	13588	1.68185	1	0.72272	61.4363
GOTERM_BP_FAT	GO:0006090~pyruvate metabolic process	4	0.0650936	0.0555224	RBP4, G6PC, DLAT, G6PC3	477	25	13588	4.55782	1	0.732531	62.8522
GOTERM_BP_FAT	GO:0019319~hexose biosynthetic process	4	0.0650936	0.0555224	RBP4, G6PC, G6PC3, PMM1	477	25	13588	4.55782	1	0.732531	62.8522
GOTERM_BP_FAT	GO:0051092~positive regulation of NF-kappaB transcription factor activity	4	0.0650936	0.0555224	NOD2, TLR2, EDA2R, TLR4	477	25	13588	4.55782	1	0.732531	62.8522
GOTERM_BP_FAT	GO:0048667~cell morphogenesis involved in neuron differentiation	12	0.195281	0.0555433	HES1, PLXNA3, HOXA2, NRP1, PLA2G10, SPNB4, EPHB3, RGNEF, SLITRK6, CDH4, BOC, ETV4	477	182	13588	1.87822	1	0.728889	62.8665
GOTERM_BP_FAT	GO:0001817~regulation of cytokine production	10	0.162734	0.0556015	NOD2, NOD1, IL18, PPARG, TLR1, TLR2, TLR4, TLR6, CD1D1, CD14	477	139	13588	2.04938	1	0.725521	62.9061
GOTERM_BP_FAT	GO:0007411~axon guidance	8	0.130187	0.0562259	PLXNA3, HOXA2, NRP1, PLA2G10, EPHB3, CDH4, BOC, ETV4	477	98	13588	2.32542	1	0.725884	63.3289
GOTERM_BP_FAT	GO:0008202~steroid metabolic process	11	0.179007	0.0568836	G6PC, STARD5, CYP39A1, HMGCS2, SAA1, AKR1C18, SULT1A1, HSD11B2, SCARB1, SIGMAR1, VLDLR	477	161	13588	1.94627	1	0.726456	63.7695
GOTERM_BP_FAT	GO:0044275~cellular carbohydrate catabolic process	6	0.0976404	0.0585272	LDHB, G6PC, PFKL, HK1, ENO3, DLAT	477	60	13588	2.84864	1	0.733205	64.8486
GOTERM_BP_FAT	GO:0007409~axonogenesis	11	0.179007	0.0608165	PLXNA3, HOXA2, NRP1, PLA2G10, SPNB4, EPHB3, RGNEF, SLITRK6, CDH4, BOC, ETV4	477	163	13588	1.92239	1	0.743527	66.3013
GOTERM_BP_FAT	GO:0060740~prostate gland epithelium morphogenesis	4	0.0650936	0.061192	HOXD13, HOXB13, ESR2, SOX9	477	26	13588	4.38252	1	0.742235	66.5341
GOTERM_BP_FAT	GO:0009743~response to carbohydrate stimulus	4	0.0650936	0.061192	GLUL, PFKL, EIF2B1, FKBP1B	477	26	13588	4.38252	1	0.742235	66.5341
GOTERM_BP_FAT	GO:0044264~cellular polysaccharide metabolic process	5	0.081367	0.0627565	G6PC, PPP1R3B, GNE, PPP1R1A, PYGB	477	43	13588	3.31237	1	0.747852	67.4879
GOTERM_BP_FAT	GO:0009064~glutamine family amino acid metabolic process	5	0.081367	0.0627565	GLUL, GAD2, PYCR2, ASS1, GGH	477	43	13588	3.31237	1	0.747852	67.4879
GOTERM_BP_FAT	GO:0001819~positive regulation of cytokine production	6	0.0976404	0.0655995	NOD2, NOD1, IL18, TLR2, TLR4, CD14	477	62	13588	2.75675	1	0.760255	69.1558
GOTERM_BP_FAT	GO:0006096~glycolysis	5	0.081367	0.0672091	LDHB, PFKL, HK1, ENO3, DLAT	477	44	13588	3.23709	1	0.765489	70.064
GOTERM_BP_FAT	GO:0008652~cellular amino acid biosynthetic process	5	0.081367	0.0672091	GLUL, PYCR2, ASS1, MAT2A, CBS	477	44	13588	3.23709	1	0.765489	70.064
GOTERM_BP_FAT	GO:0002688~regulation of leukocyte chemotaxis	2	0.0325468	0.0688371	NOD2, THBS1	477	2	13588	28.4864	1	0.770619	70.957
GOTERM_BP_FAT	GO:0000904~cell morphogenesis involved in differentiation	13	0.211554	0.0692236	PLXNA3, NRP1, PLA2G10, SOX9, EPHB3, RGNEF, CDH4, HES1, HOXA2, SPNB4, SLITRK6, BOC, ETV4	477	212	13588	1.74681	1	0.769346	71.1652
GOTERM_BP_FAT	GO:0060541~respiratory system development	9	0.146461	0.0698178	HES1, CTTNBP2, RBP4, FGFR4, FOXA2, HOXA5, ANO1, MMP14, FGF1	477	124	13588	2.06756	1	0.769137	71.4827
GOTERM_BP_FAT	GO:0015698~inorganic anion transport	7	0.113914	0.0707489	TST, SLC26A3, CTTNBP2, PTGER3, SLC20A1, WNK4, ANO1	477	83	13588	2.40247	1	0.770609	71.9735
GOTERM_BP_FAT	GO:0051046~regulation of secretion	9	0.146461	0.072434	GCG, RBP4, ICA1, NOD2, OIT1, PFKL, NTRK2, GRIK5, CELSR1	477	125	13588	2.05102	1	0.775701	72.8417
GOTERM_BP_FAT	GO:0045165~cell fate commitment	10	0.162734	0.0735874	HES1, SMO, FGFR4, HOXA2, PRDM14, EVX1, FOXA2, PPARG, SOX9, FGF1	477	147	13588	1.93785	1	0.778109	73.4212
GOTERM_BP_FAT	GO:0015908~fatty acid transport	3	0.0488202	0.0740243	SLC27A1, PPARG, ANXA1	477	13	13588	6.57378	1	0.777113	73.6376
GOTERM_BP_FAT	GO:0045408~regulation of interleukin-6 biosynthetic process	3	0.0488202	0.0740243	TLR1, TLR4, TLR6	477	13	13588	6.57378	1	0.777113	73.6376
GOTERM_BP_FAT	GO:0022612~gland morphogenesis	7	0.113914	0.0740596	NRP1, SERPINB5, HOXD13, HOXB13, ESR2, SOX9, ETV4	477	84	13588	2.37386	1	0.774245	73.655
GOTERM_BP_FAT	GO:0048870~cell motility	16	0.260374	0.0745003	NRP2, SATB2, VAV3, NRP1, FGF15, GJA1, PF4, ESR2, MMP14, SMO, CTTNBP2, DNAHC5, SEMA3F, SCARB1, SCNN1B, SRGAP1	477	284	13588	1.60487	1	0.773303	73.8716
GOTERM_BP_FAT	GO:0051674~localization of cell	16	0.260374	0.0745003	NRP2, SATB2, VAV3, NRP1, FGF15, GJA1, PF4, ESR2, MMP14, SMO, CTTNBP2, DNAHC5, SEMA3F, SCARB1, SCNN1B, SRGAP1	477	284	13588	1.60487	1	0.773303	73.8716
GOTERM_BP_FAT	GO:0006873~cellular ion homeostasis	15	0.244101	0.0749443	CLN3, SLC8A1, PTGER3, UGT8A, GRIK5, FKBP1B, TRF, BEST2, CD9, SLC24A3, WNK4, PRNP, CHRNA1, SCARA5, MT3	477	261	13588	1.63715	1	0.772391	74.088
GOTERM_BP_FAT	GO:0043549~regulation of kinase activity	12	0.195281	0.075118	VAV3, KLK1B4, TLR1, ERN2, DGKH, TLR4, TLR6, PKIA, IRS1, SPRY4, VLDLR, CBS	477	192	13588	1.7804	1	0.77023	74.1722
GOTERM_BP_FAT	GO:0048729~tissue morphogenesis	14	0.227828	0.0761479	NRP1, HOXD13, HOXB13, CELSR1, ESR2, SOX9, TNNI1, TCF7L1, LY6E, HOXA5, SERPINB5, PTCD2, ETV4, CAR2	477	238	13588	1.67567	1	0.772064	74.6663
GOTERM_BP_FAT	GO:0046164~alcohol catabolic process	6	0.0976404	0.0770618	LDHB, PFKL, ADH1, HK1, ENO3, DLAT	477	65	13588	2.62951	1	0.77333	75.0973
GOTERM_BP_FAT	GO:0048598~embryonic morphogenesis	19	0.309194	0.0802021	RBP4, SATB2, FOXA2, HOXD12, C630004H02RIK, HOXD13, GJB5, CELSR1, ZBTB16, HOXD9, HES1, HOXA2, HOXA3, HOXA5, HOXA6, HOXA7, HOXA10, HOXA9, ODZ4	477	359	13588	1.50764	1	0.784354	76.526
GOTERM_BP_FAT	GO:0010817~regulation of hormone levels	9	0.146461	0.080636	RBP4, LY6E, ADH1, AKR1C18, IL1RN, HSD11B2, SCARB1, FKBP1B, IRS1	477	128	13588	2.00295	1	0.7834	76.7172
GOTERM_BP_FAT	GO:0014031~mesenchymal cell development	5	0.081367	0.081514	NRP2, SMO, FGF15, SEMA3F, SOX9	477	47	13588	3.03047	1	0.784348	77.0997
GOTERM_BP_FAT	GO:0010975~regulation of neuron projection development	5	0.081367	0.081514	PLXNA3, NRP1, SEMA3F, NTRK2, CDH4	477	47	13588	3.03047	1	0.784348	77.0997
GOTERM_BP_FAT	GO:0002218~activation of innate immune response	3	0.0488202	0.0844191	NOD2, TLR2, TLR4	477	14	13588	6.10422	1	0.793609	78.3234
GOTERM_BP_FAT	GO:0010604~positive regulation of macromolecule metabolic process	30	0.488202	0.0846012	GLIS3, EVX1, FOXA2, TLR1, PPARG, HOXD13, TNFSF13, TLR4, TNFSF12, CD1D1, SOX9, IL34, TLR6, CITED4, TCF7L1, HOXA2, NOD2, HOXA7, CREB3L4, FGF1, FAM129A, ETV5, ETV4, SATB2, NR4A1, HOXD9, HES1, SMO, SGSM3, DOK7, HIVEP3	477	633	13588	1.35007	1	0.791636	78.398
GOTERM_BP_FAT	GO:0008543~fibroblast growth factor receptor signaling pathway	4	0.0650936	0.0863776	FGFR4, KLB, FGF15, FGF1	477	30	13588	3.79818	1	0.796033	79.1133
GOTERM_BP_FAT	GO:0033674~positive regulation of kinase activity	9	0.146461	0.0863982	VAV3, KLK1B4, TLR1, ERN2, DGKH, TLR4, TLR6, IRS1, VLDLR	477	130	13588	1.97213	1	0.793461	79.1215
GOTERM_BP_FAT	GO:0048705~skeletal system morphogenesis	9	0.146461	0.0863982	HOXD9, HOXA2, SATB2, HOXA3, HOXA5, HOXA6, HOXA7, SOX9, CBS	477	130	13588	1.97213	1	0.793461	79.1215
GOTERM_BP_FAT	GO:0006820~anion transport	9	0.146461	0.0863982	TST, SLC26A3, CTTNBP2, SLC16A1, PTGER3, SLC20A1, WNK4, TOMM40L, ANO1	477	130	13588	1.97213	1	0.793461	79.1215
GOTERM_BP_FAT	GO:0055082~cellular chemical homeostasis	15	0.244101	0.0868836	CLN3, SLC8A1, PTGER3, UGT8A, GRIK5, FKBP1B, TRF, BEST2, CD9, SLC24A3, WNK4, PRNP, CHRNA1, SCARA5, MT3	477	268	13588	1.59439	1	0.792733	79.313
GOTERM_BP_FAT	GO:0010740~positive regulation of protein kinase cascade	7	0.113914	0.0881688	NOD2, NOD1, KLB, EDA2R, TLR4, TLR6, NENF	477	88	13588	2.26596	1	0.795124	79.812
GOTERM_BP_FAT	GO:0048514~blood vessel morphogenesis	12	0.195281	0.0887275	NRP1, IL18, GJA1, TNFSF13, TNFSF12, ARHGAP24, MMP14, SMO, HOXA3, ECSCR, NTRK2, PLCD3, FGF1	477	198	13588	1.72645	1	0.794686	80.0253
GOTERM_BP_FAT	GO:0048878~chemical homeostasis	19	0.309194	0.0904541	CLN3, SLC8A1, PTGER3, UGT8A, GRIK5, AQP4, ATP12A, FKBP1B, TRF, BEST2, CD9, G6PC, SLC24A3, WNK4, SCARB1, PRNP, CHRNA1, SCARA5, MT3	477	365	13588	1.48285	1	0.79867	80.6714
GOTERM_BP_FAT	GO:0048812~neuron projection morphogenesis	11	0.179007	0.0906368	PLXNA3, HOXA2, NRP1, PLA2G10, SPNB4, EPHB3, RGNEF, SLITRK6, CDH4, BOC, ETV4	477	176	13588	1.7804	1	0.796819	80.7386
GOTERM_BP_FAT	GO:0051338~regulation of transferase activity	12	0.195281	0.0911333	VAV3, KLK1B4, TLR1, ERN2, DGKH, TLR4, TLR6, PKIA, IRS1, SPRY4, VLDLR, CBS	477	199	13588	1.71777	1	0.796154	80.9201
GOTERM_BP_FAT	GO:0002237~response to molecule of bacterial origin	5	0.081367	0.0918163	NOD2, TLR1, TLR2, TLR4, CD14	477	49	13588	2.90677	1	0.796192	81.1671
GOTERM_BP_FAT	GO:0048762~mesenchymal cell differentiation	5	0.081367	0.0918163	NRP2, SMO, FGF15, SEMA3F, SOX9	477	49	13588	2.90677	1	0.796192	81.1671
GOTERM_BP_FAT	GO:0050878~regulation of body fluid levels	7	0.113914	0.0919106	ANXA8, PTGER3, F3, HSD11B2, PF4, ANXA5, AGR2	477	89	13588	2.2405	1	0.794052	81.201
GOTERM_BP_FAT	GO:0050801~ion homeostasis	16	0.260374	0.0922783	CLN3, SLC8A1, PTGER3, UGT8A, GRIK5, ATP12A, FKBP1B, TRF, BEST2, CD9, SLC24A3, WNK4, PRNP, CHRNA1, SCARA5, MT3	477	293	13588	1.55557	1	0.792941	81.3325
GOTERM_BP_FAT	GO:0046364~monosaccharide biosynthetic process	4	0.0650936	0.0932613	RBP4, G6PC, G6PC3, PMM1	477	31	13588	3.67566	1	0.794107	81.6799
GOTERM_BP_FAT	GO:0010627~regulation of protein kinase cascade	10	0.162734	0.0947926	NOD2, NOD1, KLB, EDA2R, TLR4, TLR6, TIMP2, NENF, PHLDA3, CBS	477	155	13588	1.83783	1	0.797231	82.2089
GOTERM_BP_FAT	GO:0030324~lung development	8	0.130187	0.0948034	HES1, CTTNBP2, RBP4, FGFR4, FOXA2, HOXA5, MMP14, FGF1	477	111	13588	2.05307	1	0.794859	82.2126
GOTERM_BP_FAT	GO:0019725~cellular homeostasis	18	0.292921	0.0950619	CLN3, SLC8A1, PTGER3, UGT8A, GRIK5, PDIA5, FKBP1B, TRF, BEST2, CD9, NXN, SLC24A3, PRDX6, WNK4, PRNP, CHRNA1, SCARA5, MT3	477	343	13588	1.49491	1	0.79339	82.3004
GOTERM_BP_FAT	GO:0009084~glutamine family amino acid biosynthetic process	3	0.0488202	0.0952226	GLUL, PYCR2, ASS1	477	15	13588	5.69727	1	0.791579	82.3548
GOTERM_BP_FAT	GO:0055010~ventricular cardiac muscle morphogenesis	3	0.0488202	0.0952226	LY6E, PTCD2, TNNI1	477	15	13588	5.69727	1	0.791579	82.3548
GOTERM_BP_FAT	GO:0008285~negative regulation of cell proliferation	13	0.211554	0.0953989	RBP4, CAV2, IFITM3, PPARG, SIX5, ZBTB16, ESR2, TIMP2, CD9, CTTNBP2, KISS1R, NUPR1, ETV4	477	224	13588	1.65323	1	0.789835	82.4143
GOTERM_BP_FAT	GO:0043065~positive regulation of apoptosis	14	0.227828	0.0960115	IL18, LGALS12, NR4A1, ZBTB16, ESR2, DAPK1, BNIPL, UTP11L, NOD1, NUPR1, CASP14, ERN2, BIK, PHLDA3	477	248	13588	1.6081	1	0.789675	82.6196
GOTERM_BP_FAT	GO:0048858~cell projection morphogenesis	12	0.195281	0.0985863	PLXNA3, HOXA2, NRP1, PLA2G10, SPNB4, DYNC2LI1, EPHB3, RGNEF, SLITRK6, CDH4, BOC, ETV4	477	202	13588	1.69226	1	0.796423	83.4582

## Sheet: KEGG.ileum.up
Table S2: KEGG pathway annotations for genes with higher expression in ileal IECs
Category	Term	Count	%	PValue	Genes	List Total	Pop Hits	Pop Total	Fold Enrichment	Bonferroni	Benjamini	FDR
KEGG_PATHWAY	mmu03320:PPAR signaling pathway	20	0.168719	9.42266e-07	ACOX2, ME1, EHHADH, RXRA, AQP7, PDPK1, ACSL1, CYP27A1, SORBS1, APOC3, FABP1, GYK, FABP2, SCP2, SLC27A2, ANGPTL4, SLC27A4, NR1H3, ACSL5, FABP6	394	79	5738	3.68695	0.000156404	0.000156404	0.00114492
KEGG_PATHWAY	mmu00330:Arginine and proline metabolism	16	0.134976	1.4736e-06	ALDH18A1, NAGS, OTC, CPS1, AGMAT, ALDH3A2, LAP3, ABP1, GOT1, ALDH1B1, GLS, ARG2, NOS2, OAT, ALDH9A1, PRODH	394	53	5738	4.39651	0.000244588	0.000122301	0.00179052
KEGG_PATHWAY	mmu00564:Glycerophospholipid metabolism	18	0.151847	1.59294e-06	GPD2, GPD1, PLD2, CHKA, PLD1, CDIPT, DGKQ, LYPLA1, DGKI, CDS1, DGKD, PLA2G12B, ETNK1, PHOSPHO1, PCYT1A, PTDSS1, PPAP2B, AGPAT2	394	67	5738	3.91257	0.000264393	8.81388e-05	0.00193553
KEGG_PATHWAY	mmu00561:Glycerolipid metabolism	15	0.12654	1.68162e-06	DGKQ, PNLIPRP2, DAK, DGKI, ALDH3A2, GLYCTK, AKR1B7, DGAT1, DGAT2, DGKD, ALDH1B1, GYK, PPAP2B, ALDH9A1, AGPAT2	394	47	5738	4.64791	0.000279111	6.9785e-05	0.00204328
KEGG_PATHWAY	mmu00340:Histidine metabolism	8	0.0674878	0.00109263	ABP1, ASPA, CNDP1, ALDH1B1, ACY3, ALDH3B1, ALDH3A2, ALDH9A1	394	25	5738	4.6603	0.165962	0.0356445	1.31958
KEGG_PATHWAY	mmu04070:Phosphatidylinositol signaling system	13	0.109668	0.00455889	CDIPT, DGKQ, DGKI, CDS1, PTEN, ITPR2, DGKD, PLCG2, CALM3, PLCD1, INPP4A, ITPK1, PIK3R2	394	75	5738	2.52433	0.531634	0.118753	5.40076
KEGG_PATHWAY	mmu00100:Steroid biosynthesis	6	0.0506158	0.00456703	SOAT2, SC5D, LIPA, SQLE, HSD17B7, DHCR24	394	17	5738	5.14004	0.532269	0.102868	5.41015
KEGG_PATHWAY	mmu00830:Retinol metabolism	12	0.101232	0.00596873	ALDH1A1, BCMO1, UGT2B36, DGAT1, LRAT, CYP3A25, CYP3A13, DGAT2, CYP1A1, CYP3A11, ALDH1A7, CYP3A44	394	68	5738	2.57002	0.629825	0.116817	7.01594
KEGG_PATHWAY	mmu02010:ABC transporters	9	0.0759237	0.0103224	ABCG8, ABCG5, ABCA8B, ABCD3, ABCB10, ABCC2, ABCA1, ABCB7, ABCG2	394	45	5738	2.91269	0.821367	0.174181	11.8453
KEGG_PATHWAY	mmu05222:Small cell lung cancer	13	0.109668	0.0123834	RXRA, NFKBIA, ITGA3, BCL2L1, RB1, PTEN, LAMA3, CDKN2B, ITGAV, APAF1, NOS2, FN1, PIK3R2	394	85	5738	2.22735	0.873623	0.186857	14.0503
KEGG_PATHWAY	mmu00250:Alanine, aspartate and glutamate metabolism	7	0.0590518	0.0144455	ADSS, ASPA, GOT1, ACY3, GLS, GPT, CPS1	394	30	5738	3.39814	0.910673	0.197149	16.2056
KEGG_PATHWAY	mmu00410:beta-Alanine metabolism	6	0.0506158	0.0146434	CNDP1, ALDH1B1, EHHADH, DPYD, ALDH3A2, ALDH9A1	394	22	5738	3.97185	0.9136	0.18459	16.4098
KEGG_PATHWAY	mmu00983:Drug metabolism	9	0.0759237	0.0151117	XDH, UGT2B36, CYP3A25, CYP3A13, CYP3A11, UPP1, CDA, DPYD, CYP3A44	394	48	5738	2.73065	0.920157	0.176703	16.8913
KEGG_PATHWAY	mmu04666:Fc gamma R-mediated phagocytosis	14	0.118104	0.015545	PLD2, PLD1, MARCKSL1, HCK, ASAP1, ARF6, PRKCE, VAV2, RAC2, PLCG2, SCIN, PPAP2B, DNM1, PIK3R2	394	98	5738	2.08049	0.925781	0.169533	17.3344
KEGG_PATHWAY	mmu00903:Limonene and pinene degradation	5	0.0421799	0.0161472	ACOT9, ALDH1B1, EHHADH, ALDH3A2, ALDH9A1	394	15	5738	4.85448	0.932949	0.164858	17.9468
KEGG_PATHWAY	mmu00120:Primary bile acid biosynthesis	5	0.0421799	0.0161472	ACOX2, BAAT, CYP27A1, HSD17B4, SCP2	394	15	5738	4.85448	0.932949	0.164858	17.9468
KEGG_PATHWAY	mmu00380:Tryptophan metabolism	8	0.0674878	0.0174409	ABP1, CYP1A1, ALDH1B1, EHHADH, CAT, IDO1, ALDH3A2, ALDH9A1	394	40	5738	2.91269	0.946106	0.166854	19.2482
KEGG_PATHWAY	mmu04612:Antigen processing and presentation	13	0.109668	0.0205407	CIITA, CD8A, LGMN, H2-DMB1, H2-AB1, H2-Q8, CD74, H2-DMB2, B2M, H2-BL, H2-EB1, H2-AA, H2-DMA	394	91	5738	2.08049	0.968104	0.183446	22.2899
KEGG_PATHWAY	mmu04062:Chemokine signaling pathway	21	0.177155	0.0232617	GNAI3, ROCK1, ADCY8, HCK, BCAR1, NFKBIA, GNG12, CX3CL1, VAV2, CCL5, CCR9, CCL25, RAC2, TIAM2, ADCY9, ARRB1, GNB1, CXCL16, JAK2, GRK5, PIK3R2	394	182	5738	1.6804	0.979901	0.195118	24.8728
KEGG_PATHWAY	mmu04672:Intestinal immune network for IgA production	9	0.0759237	0.0291934	CCR9, CCL25, TNFSF13B, H2-EB1, H2-AA, H2-DMB1, H2-AB1, H2-DMA, H2-DMB2	394	54	5738	2.42724	0.992688	0.228065	30.2326
KEGG_PATHWAY	mmu00140:Steroid hormone biosynthesis	8	0.0674878	0.0316987	CYP17A1, UGT2B36, CYP3A25, CYP3A13, CYP1A1, CYP3A11, HSD17B7, CYP3A44	394	45	5738	2.58906	0.995238	0.234602	32.389
KEGG_PATHWAY	mmu04912:GnRH signaling pathway	13	0.109668	0.0321504	PLD2, PLD1, ADCY8, GNA11, MAP2K4, ITPR2, ADCY9, MAP3K2, MAP3K1, PLA2G12B, CAMK2D, HBEGF, CALM3	394	97	5738	1.9518	0.995593	0.227649	32.7713
KEGG_PATHWAY	mmu04920:Adipocytokine signaling pathway	10	0.0843597	0.0377049	PRKAG3, TNFRSF1A, IRS2, ACSL1, SOCS3, RXRA, ADIPOR2, NFKBIA, JAK2, ACSL5	394	67	5738	2.17365	0.998305	0.251739	37.3123
KEGG_PATHWAY	mmu00051:Fructose and mannose metabolism	7	0.0590518	0.0378497	KHK, AKR1B7, SORD, PFKFB4, ALDOB, FBP1, FBP2	394	37	5738	2.75525	0.998347	0.243067	37.4268
KEGG_PATHWAY	mmu05330:Allograft rejection	9	0.0759237	0.0424859	H2-BL, H2-EB1, H2-AA, H2-DMB1, GZMB, H2-AB1, H2-DMA, H2-Q8, H2-DMB2	394	58	5738	2.25985	0.999259	0.259393	40.9936
KEGG_PATHWAY	mmu05332:Graft-versus-host disease	9	0.0759237	0.0424859	H2-BL, H2-EB1, H2-AA, H2-DMB1, GZMB, H2-AB1, H2-DMA, H2-Q8, H2-DMB2	394	58	5738	2.25985	0.999259	0.259393	40.9936
KEGG_PATHWAY	mmu04930:Type II diabetes mellitus	8	0.0674878	0.0475715	IRS2, SOCS2, SOCS3, SOCS1, PKLR, SOCS4, PRKCE, PIK3R2	394	49	5738	2.37771	0.999694	0.276486	44.6908
KEGG_PATHWAY	mmu00620:Pyruvate metabolism	7	0.0590518	0.0583219	ME1, AKR1B7, ME2, ALDH1B1, PKLR, ALDH3A2, ALDH9A1	394	41	5738	2.48644	0.999953	0.318639	51.8169
KEGG_PATHWAY	mmu04640:Hematopoietic cell lineage	11	0.0927957	0.0596811	CD55, CD8A, GP1BB, H2-EB1, IL4RA, H2-AA, MME, ITGA3, ITGAM, DAF2, CD7	394	84	5738	1.90712	0.999963	0.314998	52.6552
KEGG_PATHWAY	mmu04940:Type I diabetes mellitus	9	0.0759237	0.064041	H2-BL, H2-EB1, H2-AA, H2-DMB1, GZMB, H2-AB1, H2-DMA, H2-Q8, H2-DMB2	394	63	5738	2.08049	0.999983	0.324549	55.2546
KEGG_PATHWAY	mmu00600:Sphingolipid metabolism	7	0.0590518	0.0643006	SGPL1, ENPP7, SGMS2, SGPP1, UGCG, B4GALT6, PPAP2B	394	42	5738	2.42724	0.999984	0.316434	55.4052
KEGG_PATHWAY	mmu05310:Asthma	6	0.0506158	0.0715299	H2-EB1, H2-AA, H2-DMB1, H2-AB1, H2-DMA, H2-DMB2	394	33	5738	2.6479	0.999996	0.336793	59.416
KEGG_PATHWAY	mmu00053:Ascorbate and aldarate metabolism	4	0.0337439	0.0784372	UGT2B36, ALDH1B1, ALDH3A2, ALDH9A1	394	15	5738	3.88359	0.999999	0.354291	62.9362
KEGG_PATHWAY	mmu00565:Ether lipid metabolism	6	0.0506158	0.0876735	PLD2, PLD1, PLA2G12B, PAFAH1B1, PPAP2B, AGPAT2	394	35	5738	2.49659	1	0.378731	67.206
KEGG_PATHWAY	mmu00010:Glycolysis / Gluconeogenesis	9	0.0759237	0.091371	GALM, ALDH1B1, ALDOB, PKLR, FBP1, FBP2, ALDH3B1, ALDH3A2, ALDH9A1	394	68	5738	1.92752	1	0.38245	68.7849
KEGG_PATHWAY	mmu04144:Endocytosis	20	0.168719	0.096711	GIT1, PLD2, PARD6B, PLD1, RET, ASAP1, ARF6, H2-Q8, CHMP2B, AP2B1, RAB31, AP2A2, RAB11FIP3, ARRB1, H2-BL, ITCH, GRK5, EHD1, AGAP1, DNM1	394	202	5738	1.44193	1	0.391402	70.9424

## Sheet: KEGG.colon.up
Table S2: KEGG pathway annotations for genes with higher expression in colonic IECs
Category	Term	Count	%	PValue	Genes	List Total	Pop Hits	Pop Total	Fold Enrichment	Bonferroni	Benjamini	FDR
KEGG_PATHWAY	mmu00980:Metabolism of xenobiotics by cytochrome P450	11	0.179007	0.000117244	GSTM1, GSTM2, CYP2C55, GSTM3, GSTM4, CYP2F2, ADH1, CYP2C69, GSTK1, EPHX1, CYP2B10	210	66	5738	4.55397	0.0166271	0.0166271	0.138762
KEGG_PATHWAY	mmu00601:Glycosphingolipid biosynthesis	7	0.113914	0.000168712	ST3GAL3, FUT9, B3GNT5, B3GALT5, ST3GAL6, FUT4, FUT2	210	24	5738	7.96944	0.0238392	0.0119915	0.199621
KEGG_PATHWAY	mmu00982:Drug metabolism	11	0.179007	0.000346057	CYP2D9, GSTM1, GSTM2, CYP2D10, CYP2C55, GSTM3, GSTM4, ADH1, CYP2C69, GSTK1, CYP2B10	210	75	5738	4.00749	0.0482898	0.0163629	0.409062
KEGG_PATHWAY	mmu00590:Arachidonic acid metabolism	10	0.162734	0.00300958	PLA2G4A, CYP2C55, CBR1, CBR2, PLA2G10, CYP2C69, PLA2G2C, CBR3, CYP2B10, PLA2G2F	210	83	5738	3.29203	0.350154	0.102152	3.50663
KEGG_PATHWAY	mmu00561:Glycerolipid metabolism	7	0.113914	0.00670265	AKR1B8, LPL, AKR1B3, LIPG, MGLL, DGKH, AGPAT4	210	47	5738	4.0695	0.617759	0.174975	7.65566
KEGG_PATHWAY	mmu00565:Ether lipid metabolism	6	0.0976404	0.00813719	PLA2G4A, PLA2G10, PAFAH1B3, PLA2G2C, AGPAT4, PLA2G2F	210	35	5738	4.68408	0.689129	0.176943	9.22279
KEGG_PATHWAY	mmu00051:Fructose and mannose metabolism	6	0.0976404	0.0103034	AKR1B8, PFKL, AKR1B3, HK1, FUK, PMM1	210	37	5738	4.43089	0.772598	0.190693	11.5431
KEGG_PATHWAY	mmu00010:Glycolysis / Gluconeogenesis	8	0.130187	0.011334	LDHB, G6PC, PFKL, ADH1, HK1, ENO3, DLAT, ACSS2	210	68	5738	3.21457	0.804074	0.184336	12.6279
KEGG_PATHWAY	mmu00052:Galactose metabolism	5	0.081367	0.0155445	AKR1B8, G6PC, PFKL, AKR1B3, HK1	210	27	5738	5.05996	0.893576	0.220362	16.9343
KEGG_PATHWAY	mmu00620:Pyruvate metabolism	6	0.0976404	0.0157576	AKR1B8, LDHB, AKR1B3, DLAT, ACSS2, ACAT1	210	41	5738	3.99861	0.89682	0.203181	17.1469
KEGG_PATHWAY	mmu04960:Aldosterone-regulated sodium reabsorption	6	0.0976404	0.0173725	FXYD4, HSD11B2, SCNN1B, SCNN1A, SLC9A3R2, IRS1	210	42	5738	3.9034	0.918414	0.203738	18.7426
KEGG_PATHWAY	mmu00591:Linoleic acid metabolism	6	0.0976404	0.0249169	PLA2G4A, CYP2C55, PLA2G10, CYP2C69, PLA2G2C, PLA2G2F	210	46	5738	3.56398	0.972901	0.259692	25.8312
KEGG_PATHWAY	mmu00592:alpha-Linolenic acid metabolism	4	0.0650936	0.0259498	PLA2G4A, PLA2G10, PLA2G2C, PLA2G2F	210	18	5738	6.07196	0.976712	0.25115	26.7563
KEGG_PATHWAY	mmu00564:Glycerophospholipid metabolism	7	0.113914	0.0342914	PLA2G4A, PLA2G15, PLA2G10, DGKH, PLA2G2C, AGPAT4, PLA2G2F	210	67	5738	2.85473	0.993192	0.299813	33.8493
KEGG_PATHWAY	mmu00280:Valine, leucine and isoleucine degradation	5	0.081367	0.0851234	HMGCS2, IVD, BCKDHB, ACAT1, PCCA	210	46	5738	2.96998	0.999997	0.571791	65.1325
KEGG_PATHWAY	mmu00603:Glycosphingolipid biosynthesis	3	0.0488202	0.0901601	FUT9, B3GALT5, FUT2	210	14	5738	5.8551	0.999999	0.570217	67.3392
KEGG_PATHWAY	mmu00640:Propanoate metabolism	4	0.0650936	0.094203	LDHB, ACSS2, ACAT1, PCCA	210	30	5738	3.64317	0.999999	0.564935	69.0171
KEGG_PATHWAY	mmu00250:Alanine, aspartate and glutamate metabolism	4	0.0650936	0.094203	GLUL, GAD2, ASS1, GPT2	210	30	5738	3.64317	0.999999	0.564935	69.0171
