# Supplementary material for: Microbiota modulate transcription in the intestinal epithelium without remodeling the accessible chromatin landscape
Source: HighWire-hosted journal article supplement (doi:10.1101/gr.165845.113), 2014-06-24
Supplement: Supplemental_TableS3.xlsx [file Supplemental_TableS3.xlsx]

## Sheet: CR vs. GF ileum
Table S3: Genes differentially expressed in the presence and absence of microbiota (CR vs. GF ileum).
gene	locus	sample_1	sample_2	value_1	value_2	log2.fold_change.	test_stat	p_value	q_value	significant
4933409K07Rik	chr4:41763293-42104673	CR_Ileum	GF_Ileum	19.189	0.0119978	-10.6433	7.21797	5.28e-13	5.54e-11	yes
Mcpt2	chr14:56660959-56663471	CR_Ileum	GF_Ileum	6.92494	0.015242	-8.8276	3.31836	0.000905469	0.0138074	yes
Pcsk6	chr7:73007021-73195272	CR_Ileum	GF_Ileum	0.673072	0.00291382	-7.85171	2.92657	0.00342718	0.040455	yes
Mcpt1	chr14:56636800-56639228	CR_Ileum	GF_Ileum	13.2397	0.108136	-6.93588	5.31542	1.06e-07	4.76e-06	yes
Fn1	chr1:71632096-71699779	CR_Ileum	GF_Ileum	0.968316	0.0102563	-6.5609	4.16878	3.06e-05	0.000766904	yes
Gsdmc	chr15:63607525-63640294	CR_Ileum	GF_Ileum	1.87886	0.0212721	-6.46475	4.02069	5.8e-05	0.00133645	yes
Fgf15	chr7:152082436-152086856	CR_Ileum	GF_Ileum	26.8459	0.478416	-5.81029	7.57088	3.71e-14	4.56e-12	yes
S100g	chrX:159339290-159472473	CR_Ileum	GF_Ileum	61.9597	2.08088	-4.89606	3.31997	0.000900278	0.0137462	yes
Slc6a14	chrX:21292025-21319483	CR_Ileum	GF_Ileum	6.88161	0.261738	-4.71655	5.92758	3.07e-09	1.84e-07	yes
U90926	chr5:92638601-92653063	CR_Ileum	GF_Ileum	3.78408	0.152045	-4.63737	3.49602	0.000472259	0.00805153	yes
Saa1	chr7:53995868-53998350	CR_Ileum	GF_Ileum	44.0135	1.84573	-4.57568	5.90604	3.5e-09	2.07e-07	yes
Il1rl1	chr1:40486257-40522259	CR_Ileum	GF_Ileum	1.46966	0.0673451	-4.44777	3.32775	0.000875489	0.0134363	yes
Gm14306,Gm14436	chr2:175295525-175308823	CR_Ileum	GF_Ileum	1.58733	0.080351	-4.30414	4.46061	8.17e-06	0.000238149	yes
-	chrX:50818806-50823772	CR_Ileum	GF_Ileum	0.372538	0.0225606	-4.04551	2.98226	0.00286128	0.0350722	yes
H2-Aa	chr17:34419695-34424716	CR_Ileum	GF_Ileum	201.075	15.9398	-3.65703	5.35791	8.42e-08	3.85e-06	yes
9530053A07Rik	chr7:28914484-28949830	CR_Ileum	GF_Ileum	17.1683	1.36526	-3.6525	6.81765	9.25e-12	8.06e-10	yes
Npl	chr1:155350145-155396870	CR_Ileum	GF_Ileum	8.34302	0.677077	-3.62318	4.56509	4.99e-06	0.000154382	yes
-	chr3:92092089-92093213	CR_Ileum	GF_Ileum	22.0892	1.87286	-3.56002	4.9112	9.05e-07	3.33e-05	yes
H2-DMb1	chr17:34290135-34297174	CR_Ileum	GF_Ileum	22.8635	1.95858	-3.54517	5.11458	3.14e-07	1.28e-05	yes
Cd74	chr18:60963502-60972306	CR_Ileum	GF_Ileum	634.725	56.2296	-3.49673	3.5282	0.000418389	0.00725959	yes
Lct	chr1:130181340-130224895	CR_Ileum	GF_Ileum	21.6272	1.94306	-3.47644	5.68758	1.29e-08	6.91e-07	yes
Dock10	chr1:80497647-80755128	CR_Ileum	GF_Ileum	0.492393	0.0454617	-3.43709	3.05416	0.00225693	0.0290848	yes
Gzmb	chr14:56877694-56881097	CR_Ileum	GF_Ileum	14.4756	1.36124	-3.41062	5.00644	5.54e-07	2.15e-05	yes
Acot12	chr13:91600701-91926971	CR_Ileum	GF_Ileum	1.69787	0.166821	-3.34735	3.01529	0.00256735	0.0322345	yes
Fut2	chr7:52903920-52921848	CR_Ileum	GF_Ileum	10.6325	1.05018	-3.33977	4.19853	2.69e-05	0.00068201	yes
H2-Eb1	chr17:34442811-34453619	CR_Ileum	GF_Ileum	98.53	9.88977	-3.31655	3.88536	0.000102178	0.00218072	yes
Ubd	chr17:37330836-37333046	CR_Ileum	GF_Ileum	3.10181	0.325225	-3.2536	3.02377	0.00249648	0.0315555	yes
H2-DMb2	chr17:34282360-34288040	CR_Ileum	GF_Ileum	3.75862	0.432067	-3.12088	3.10062	0.00193115	0.0256024	yes
Slc28a2	chr2:122252212-122353776	CR_Ileum	GF_Ileum	39.2887	4.59256	-3.09675	3.72967	0.000191734	0.00375093	yes
Dtx1	chr5:121130272-121161678	CR_Ileum	GF_Ileum	1.03055	0.125964	-3.03234	3.59728	0.000321563	0.00581954	yes
Ikzf3	chr11:98322215-98407437	CR_Ileum	GF_Ileum	1.28986	0.159367	-3.01678	3.11298	0.0018521	0.0247889	yes
Gbp6,Gbp9	chr5:105505518-105722773	CR_Ileum	GF_Ileum	4.81753	0.614134	-2.97167	3.10558	0.00189907	0.0252782	yes
Gzma	chr13:113884034-113891189	CR_Ileum	GF_Ileum	44.565	5.8024	-2.94119	4.69877	2.62e-06	8.66e-05	yes
Cyfip2	chr11:46007359-46125852	CR_Ileum	GF_Ileum	0.378368	0.0498433	-2.92432	2.96269	0.00304966	0.0368811	yes
Itk	chr11:46138651-46203017	CR_Ileum	GF_Ileum	0.569304	0.0767024	-2.89186	3.01226	0.00259308	0.0324656	yes
Ccl5	chr11:83339280-83344020	CR_Ileum	GF_Ileum	50.7807	6.93589	-2.87213	4.49056	7.1e-06	0.000210732	yes
Fmnl1	chr11:103032429-103060214	CR_Ileum	GF_Ileum	0.790584	0.108611	-2.86374	2.96796	0.00299782	0.0364103	yes
Gimap4	chr6:48634576-48642104	CR_Ileum	GF_Ileum	2.61984	0.36127	-2.85833	2.87091	0.00409288	0.0465756	yes
Cd7	chr11:120898062-120900792	CR_Ileum	GF_Ileum	12.0551	1.68246	-2.841	4.15314	3.28e-05	0.000813762	yes
Dock2	chr11:34126863-34597325	CR_Ileum	GF_Ileum	0.458562	0.0658132	-2.80067	3.10102	0.00192855	0.0255756	yes
Olfr741	chr14:51085707-51106070	CR_Ileum	GF_Ileum	266.64	38.4434	-2.79409	3.64735	0.000264956	0.00492964	yes
Itgb2	chr10:76993092-77028419	CR_Ileum	GF_Ileum	1.06522	0.159264	-2.74166	3.14566	0.00165714	0.0226218	yes
Gata4	chr14:63817751-63864116	CR_Ileum	GF_Ileum	7.61574	1.13966	-2.74038	4.87785	1.07e-06	3.89e-05	yes
Cd3g	chr9:44777654-44788514	CR_Ileum	GF_Ileum	5.12784	0.7939	-2.69132	3.24783	0.0011629	0.0169266	yes
Cd96	chr16:46035769-46120361	CR_Ileum	GF_Ileum	1.18709	0.18407	-2.6891	2.84909	0.00438438	0.0491376	yes
Hmgcs2	chr3:98083631-98116564	CR_Ileum	GF_Ileum	6.91477	1.08571	-2.67104	3.80241	0.000143298	0.0029251	yes
H2-Ab1	chr17:34400171-34406363	CR_Ileum	GF_Ileum	226.722	35.9703	-2.65604	3.96408	7.37e-05	0.00164173	yes
9930013L23Rik	chr7:91081366-91235015	CR_Ileum	GF_Ileum	0.439423	0.0734197	-2.58137	3.04806	0.00230327	0.0295607	yes
Ciita	chr16:10488371-10543169	CR_Ileum	GF_Ileum	2.39332	0.411984	-2.53835	2.97332	0.00294596	0.0358942	yes
Msn	chrX:93291383-93363892	CR_Ileum	GF_Ileum	1.15724	0.203476	-2.50776	3.16719	0.00153921	0.0212959	yes
Itgb7	chr15:102046425-102062366	CR_Ileum	GF_Ileum	1.89376	0.342929	-2.46527	3.2827	0.00102818	0.015316	yes
Cyp2b10	chr7:26682682-26711643	CR_Ileum	GF_Ileum	6.98252	1.27966	-2.44799	3.25031	0.00115279	0.0168113	yes
Laptm5	chr4:130469248-130492063	CR_Ileum	GF_Ileum	3.22565	0.591407	-2.44736	3.49351	0.000476718	0.00811634	yes
Me1	chr9:86474969-86589947	CR_Ileum	GF_Ileum	19.939	3.67183	-2.44102	3.65848	0.000253715	0.00475475	yes
Slfn2	chr11:82878613-82884180	CR_Ileum	GF_Ileum	2.64547	0.508638	-2.37881	3.02867	0.00245635	0.0311451	yes
Nebl	chr2:17264690-17652718	CR_Ileum	GF_Ileum	1.76102	0.338679	-2.37842	3.17934	0.0014761	0.0205779	yes
Slc30a10	chr1:187253235-187292650	CR_Ileum	GF_Ileum	16.1235	3.21244	-2.32742	3.31498	0.000916487	0.0139505	yes
Dclk1	chr3:55046445-55342990	CR_Ileum	GF_Ileum	2.65789	0.562197	-2.24113	3.01098	0.00260403	0.0325733	yes
Pmepa1	chr2:173049965-173102034	CR_Ileum	GF_Ileum	5.76708	1.23549	-2.22276	3.42252	0.000620443	0.0101264	yes
Tnfsf13b	chr8:10006503-10036160	CR_Ileum	GF_Ileum	6.70823	1.45658	-2.20334	2.93372	0.00334921	0.0397183	yes
Usp18	chr6:121195923-121220935	CR_Ileum	GF_Ileum	4.84276	1.0589	-2.19327	3.01523	0.00256783	0.0322384	yes
AA467197	chr2:122463622-122466812	CR_Ileum	GF_Ileum	268.11	60.0342	-2.15897	3.41713	0.000632855	0.0102982	yes
Gprc5a	chr6:135015679-135034729	CR_Ileum	GF_Ileum	23.9318	5.43415	-2.1388	3.69426	0.00022053	0.00422771	yes
-	chr2:122208693-122215777	CR_Ileum	GF_Ileum	2.31556	0.528861	-2.1304	3.03	0.00244555	0.0310383	yes
Nt5e	chr9:88222446-88270370	CR_Ileum	GF_Ileum	11.0506	2.63072	-2.0706	3.36361	0.00076929	0.0120945	yes
Ada	chr2:163552319-163575943	CR_Ileum	GF_Ileum	83.3537	19.917	-2.06525	3.69319	0.000221458	0.00424331	yes
Ces2a	chr8:107226557-107362922	CR_Ileum	GF_Ileum	173.207	41.6189	-2.05718	3.6481	0.000264192	0.00492243	yes
Socs1	chr16:10783901-10785629	CR_Ileum	GF_Ileum	14.8505	3.79429	-1.96861	2.87731	0.00401079	0.0458581	yes
Siglec5	chr7:50606723-50615186	CR_Ileum	GF_Ileum	8.1349	2.14074	-1.92602	2.9673	0.00300425	0.0364545	yes
Cyp3a11	chr5:146666180-146691472	CR_Ileum	GF_Ileum	42.3249	11.7479	-1.8491	3.50183	0.000462072	0.00790516	yes
Alox5	chr6:116360088-116411196	CR_Ileum	GF_Ileum	4.95783	1.38762	-1.8371	2.85013	0.0043702	0.0490009	yes
Rac2	chr15:78389598-78403213	CR_Ileum	GF_Ileum	6.5686	1.86148	-1.81913	2.97424	0.00293715	0.0358144	yes
Kctd12	chr14:103375797-103381854	CR_Ileum	GF_Ileum	26.4523	7.77931	-1.76568	2.90514	0.00367088	0.0427771	yes
Cyp2c55	chr19:39081508-39117177	CR_Ileum	GF_Ileum	47.5899	14.0541	-1.75966	3.07994	0.00207041	0.0271328	yes
Creb3l3	chr10:80547073-80561617	CR_Ileum	GF_Ileum	111.963	33.5944	-1.73674	2.88527	0.00391078	0.0449384	yes
Gm14446	chr19:34667377-34676458	CR_Ileum	GF_Ileum	21.5392	6.65884	-1.69362	2.89793	0.00375633	0.0435444	yes
Egr1	chr18:35020860-35024610	CR_Ileum	GF_Ileum	6.4001	19.5865	1.6137	-3.01934	0.00253324	0.0319029	yes
Scd1	chr19:44468939-44482199	CR_Ileum	GF_Ileum	2.69774	10.8833	2.01229	-3.63531	0.000277647	0.00513309	yes
Atg16l2	chr7:108434136-108450762	CR_Ileum	GF_Ileum	2.9107	12.5453	2.10771	-3.002	0.00268213	0.0333735	yes
Gm3776	chr9:78104935-78116973	CR_Ileum	GF_Ileum	10.6965	46.3523	2.1155	-3.7612	0.000169098	0.00336757	yes
Gsta1	chr9:78078475-78090490	CR_Ileum	GF_Ileum	22.9952	99.8707	2.11873	-4.01786	5.87e-05	0.00134994	yes
Gcg	chr2:62312586-62321715	CR_Ileum	GF_Ileum	4.84293	21.8904	2.17635	-3.19095	0.00141808	0.019909	yes
Akr1c19	chr13:4232949-4257795	CR_Ileum	GF_Ileum	39.2988	180.201	2.19705	-3.04593	0.0023196	0.0297302	yes
Angptl4	chr17:33911844-33918520	CR_Ileum	GF_Ileum	27.0856	148.58	2.45564	-3.35955	0.000780684	0.0122355	yes
AY761185	chr8:22083372-22084427	CR_Ileum	GF_Ileum	0.0204672	7.04e-08	-18.1501	0.00931877	0.992565	1	no
Rtl1	chr12:110828378-110833613	CR_Ileum	GF_Ileum	1302.5	0.0141036	-16.4949	0.00028614	0.999772	0.999999	no
Adra2b	chr2:127189021-127192957	CR_Ileum	GF_Ileum	0.00337061	5.96e-08	-15.7876	0.0263164	0.979005	1	no
Hist1h2bn	chr13:21845991-21846372	CR_Ileum	GF_Ileum	0.0809909	1.73e-06	-15.5106	0.0319611	0.974503	1	no
4930503E24Rik	chr10:123906129-123961544	CR_Ileum	GF_Ileum	0.0313005	7.19e-07	-15.4101	0.049363	0.96063	1	no
Foxg1	chr12:50483869-50487854	CR_Ileum	GF_Ileum	0.00179236	6.89e-08	-14.6662	6.89e-05	0.999945	1	no
Hist1h2bk	chr13:22127755-22128136	CR_Ileum	GF_Ileum	0.0355441	1.73e-06	-14.3224	0.0295125	0.976456	1	no
Ubtfl1	chr9:18208861-18215946	CR_Ileum	GF_Ileum	0.00976889	8.05e-07	-13.567	0.0672305	0.946398	1	no
Zfp957	chr14:79612161-79647174	CR_Ileum	GF_Ileum	0.0205214	1.88e-06	-13.4109	0.103967	0.917196	1	no
Dsg3	chr18:20668804-20699811	CR_Ileum	GF_Ileum	0.00933126	9.92e-07	-13.1993	0.0918075	0.926851	1	no
Gm5615	chr9:36339987-36349548	CR_Ileum	GF_Ileum	0.0426468	4.94e-06	-13.0751	0.15051	0.880362	1	no
Sox21	chr14:118632455-118637245	CR_Ileum	GF_Ileum	0.0642401	7.53e-06	-13.0579	0.00472152	0.996233	1	no
Cnih3	chr1:183282758-183390772	CR_Ileum	GF_Ileum	0.0138311	2.25e-06	-12.586	0.000718742	0.999427	1	no
Six2	chr17:86083607-86087594	CR_Ileum	GF_Ileum	0.0112193	2.12e-06	-12.3665	0.0881294	0.929774	1	no
-	chr11:96038855-96042279	CR_Ileum	GF_Ileum	0.00748898	1.7e-06	-12.1032	0.0890691	0.929027	1	no
Egfl6	chrX:162960938-163023648	CR_Ileum	GF_Ileum	0.0208939	6.17e-06	-11.7257	0.158059	0.87441	1	no
9830107B12Rik	chr17:48262554-48283257	CR_Ileum	GF_Ileum	0.00413777	1.27e-06	-11.6661	0.000532801	0.999575	1	no
Fam78b	chr1:168931547-169021433	CR_Ileum	GF_Ileum	0.00141087	4.41e-07	-11.6429	0.000243654	0.999806	1	no
Rs1	chrX:157205944-157432613	CR_Ileum	GF_Ileum	0.00440631	1.53e-06	-11.4929	0.00178201	0.998578	1	no
Prdx6-ps1	chr2:80132626-80135515	CR_Ileum	GF_Ileum	0.00718578	3.1e-06	-11.1804	0.101551	0.919113	1	no
Magee2	chrX:102050290-102052606	CR_Ileum	GF_Ileum	0.0064578	2.82e-06	-11.1626	0.0964202	0.923187	1	no
Slc30a8	chr15:52127107-52167288	CR_Ileum	GF_Ileum	0.00313776	2.01e-06	-10.6074	0.0695708	0.944535	1	no
4931429L15Rik	chr9:46111443-46128069	CR_Ileum	GF_Ileum	0.0296263	2.28e-05	-10.3408	0.240059	0.810284	1	no
Hemt1	chr15:74649505-74654866	CR_Ileum	GF_Ileum	0.843077	0.000862383	-9.93312	0.0717314	0.942816	0.999999	no
4930448K20Rik	chr4:9843111-9844544	CR_Ileum	GF_Ileum	0.00504228	5.99e-06	-9.71839	0.0852677	0.932049	1	no
Gpr77	chr7:16819933-16829503	CR_Ileum	GF_Ileum	0.0105207	2.19e-05	-8.90966	0.00761481	0.993924	1	no
Cntn2	chr1:134406001-134439517	CR_Ileum	GF_Ileum	0.00421561	1.12e-05	-8.56255	0.328798	0.742308	1	no
C630028M04Rik	chr4:51980965-52063982	CR_Ileum	GF_Ileum	0.00310879	8.65e-06	-8.48936	0.145185	0.884565	1	no
Pla2g4c	chr7:13907519-13946021	CR_Ileum	GF_Ileum	590.475	1.72533	-8.41886	0.91854	0.358336	0.855167	no
H2-M5	chr17:37123799-37126449	CR_Ileum	GF_Ileum	0.0111296	3.67e-05	-8.24377	0.174626	0.861374	1	no
2410114N07Rik	chr4:34857037-34858730	CR_Ileum	GF_Ileum	0.0453441	0.00020416	-7.79507	0.34319	0.731455	1	no
Cyp2b13	chr7:26846513-26881215	CR_Ileum	GF_Ileum	0.0377391	0.000194297	-7.60165	0.476821	0.633489	1	no
Cyp3a41a	chr5:146505623-146531712	CR_Ileum	GF_Ileum	0.0341705	0.000216891	-7.29964	0.517828	0.604578	1	no
Gm6320	chr13:113784075-113790602	CR_Ileum	GF_Ileum	0.0088407	5.61e-05	-7.2992	0.300203	0.764022	1	no
Gm10406	chr14:7838628-7859963	CR_Ileum	GF_Ileum	0.014231	0.000100376	-7.14748	0.335137	0.737522	1	no
Ptgs2	chr1:151947253-151955142	CR_Ileum	GF_Ileum	0.411065	0.00302639	-7.08563	2.63473	0.00842042	0.0811223	no
Lefty2	chr1:182823249-182829233	CR_Ileum	GF_Ileum	0.0243255	0.000181558	-7.0659	0.52304	0.600946	1	no
Frmpd3	chrX:136916509-136929079	CR_Ileum	GF_Ileum	0.00459825	3.99e-05	-6.84789	0.26152	0.793691	1	no
Capn6	chrX:140236779-140261955	CR_Ileum	GF_Ileum	0.00214843	2.06e-05	-6.70169	0.186934	0.851713	1	no
Gadl1	chr9:115818572-115985294	CR_Ileum	GF_Ileum	0.00338818	3.35e-05	-6.66023	0.244938	0.806504	1	no
Ifitm7	chr16:13982891-13984714	CR_Ileum	GF_Ileum	4.55e-05	4.58e-07	-6.63492	0.0186862	0.985091	1	no
Ly6i	chr15:74810241-74813860	CR_Ileum	GF_Ileum	0.0800354	0.000807983	-6.63017	0.0349826	0.972094	1	no
Duoxa2	chr2:122104824-122128621	CR_Ileum	GF_Ileum	226.849	3.67888	-5.94632	0.816889	0.413992	0.900964	no
Tm4sf1	chr3:57090000-57105841	CR_Ileum	GF_Ileum	0.419215	0.0069791	-5.90851	1.22148	0.221905	0.691325	no
Gm8096	chr8:29193665-29195325	CR_Ileum	GF_Ileum	0.0169732	0.000289952	-5.8713	0.467005	0.640496	1	no
Treml2	chr17:48439362-48451859	CR_Ileum	GF_Ileum	0.0559307	0.00099406	-5.81416	1.32439	0.185374	1	no
-	chr7:113743112-113743646	CR_Ileum	GF_Ileum	0.2572	0.00507887	-5.66224	0.848998	0.395883	1	no
Gm14501	chrX:8927724-8928263	CR_Ileum	GF_Ileum	0.104332	0.00228863	-5.51055	0.549429	0.582711	1	no
Slc35f1	chr10:52410306-52831428	CR_Ileum	GF_Ileum	0.00969353	0.000218332	-5.47243	0.618359	0.536338	1	no
Arhgap25	chr6:87409378-87483229	CR_Ileum	GF_Ileum	0.229711	0.00517874	-5.47108	0.875627	0.381233	1	no
-	chr6:68071052-68071811	CR_Ileum	GF_Ileum	1.3754	0.0332422	-5.37069	1.48825	0.136686	0.535297	no
Themis	chr10:28388200-28602555	CR_Ileum	GF_Ileum	0.129209	0.00315712	-5.35495	1.98777	0.0468371	1	no
4933416I08Rik	chrX:50989667-51016911	CR_Ileum	GF_Ileum	0.602991	0.0155788	-5.27448	1.12233	0.261721	0.747513	no
C130079G13Rik	chr3:59729135-59741871	CR_Ileum	GF_Ileum	0.00795799	0.000206735	-5.26655	0.338636	0.734884	1	no
-	chr14:16743055-16744755	CR_Ileum	GF_Ileum	0.00570522	0.000164299	-5.11789	0.247818	0.804275	1	no
Spna1	chr1:176102906-176178580	CR_Ileum	GF_Ileum	0.14871	0.0043741	-5.08738	2.61672	0.00887793	1	no
-	chr7:113650032-113650837	CR_Ileum	GF_Ileum	0.661737	0.0197265	-5.06805	1.91224	0.0558455	0.310801	no
-	chr15:77487101-77490396	CR_Ileum	GF_Ileum	2.11909	0.0651201	-5.0242	1.87144	0.0612847	0.329906	no
-	chr18:61760221-61761378	CR_Ileum	GF_Ileum	0.394435	0.0123264	-4.99997	1.8628	0.0624903	0.333831	no
3830403N18Rik	chrX:53389748-53406673	CR_Ileum	GF_Ileum	0.221617	0.00722279	-4.93937	1.29595	0.194991	1	no
Prrg3	chrX:69208359-69218067	CR_Ileum	GF_Ileum	0.00326648	0.000107243	-4.92878	0.425402	0.670544	1	no
Cplx3	chr9:57447798-57454088	CR_Ileum	GF_Ileum	0.0321968	0.00116679	-4.7863	0.927864	0.353478	1	no
-	chr11:112734291-112736689	CR_Ileum	GF_Ileum	0.144833	0.00541512	-4.74125	1.72738	0.0841003	1	no
-	chrX:50816067-50817899	CR_Ileum	GF_Ileum	0.260959	0.0100017	-4.7055	1.76124	0.0781985	0.384639	no
Adrb1	chr19:56796861-56799352	CR_Ileum	GF_Ileum	0.129968	0.00519676	-4.6444	1.71401	0.0865273	1	no
Zfp316	chr5:144011373-144031701	CR_Ileum	GF_Ileum	0.0857111	0.00346076	-4.63032	0.45407	0.649778	1	no
-	chr19:32046492-32048791	CR_Ileum	GF_Ileum	0.553509	0.0226747	-4.60945	2.64167	0.00824983	0.0798911	no
Gm5640	chrX:71884457-71890974	CR_Ileum	GF_Ileum	0.198091	0.00842851	-4.55474	2.22	0.0264184	1	no
Gsdmc4	chr15:63655810-63743857	CR_Ileum	GF_Ileum	146.483	6.28991	-4.54154	1.44611	0.148148	0.560225	no
Retnlb	chr16:48816968-48819005	CR_Ileum	GF_Ileum	2.01497	0.0870227	-4.53322	2.57264	0.0100926	0.0929897	no
-	chr2:80457362-80474889	CR_Ileum	GF_Ileum	1.0227	0.0443204	-4.52827	0.236782	0.812826	0.999999	no
Gm7616	chr9:59799100-59806851	CR_Ileum	GF_Ileum	0.0149323	0.000660925	-4.49781	0.283282	0.776961	1	no
BC094916	chr1:175451441-175466088	CR_Ileum	GF_Ileum	0.0511129	0.00226372	-4.49692	0.780722	0.434966	1	no
Klrb1a	chr6:128559244-128572952	CR_Ileum	GF_Ileum	0.267611	0.0121022	-4.4668	0.705141	0.480723	0.944047	no
-	chr14:54580612-54581278	CR_Ileum	GF_Ileum	1.17443	0.0545576	-4.42804	1.60895	0.107628	0.467099	no
Tm6sf1	chr7:89003907-89079345	CR_Ileum	GF_Ileum	0.126798	0.00594124	-4.41562	0.91697	0.359158	1	no
Rab44	chr17:29272000-29285921	CR_Ileum	GF_Ileum	0.0649918	0.00305726	-4.40994	1.58285	0.113455	1	no
-	chr7:113473791-113474076	CR_Ileum	GF_Ileum	0.513807	0.0245422	-4.38789	0.850368	0.39512	0.887205	no
Gm6762	chr9:35381220-35382248	CR_Ileum	GF_Ileum	0.0460528	0.00226817	-4.34369	0.717437	0.473104	1	no
Gata2	chr6:88148657-88157026	CR_Ileum	GF_Ileum	0.0786045	0.00391896	-4.32607	1.56698	0.117118	1	no
Ccr5	chr9:124036281-124041922	CR_Ileum	GF_Ileum	0.174363	0.00874427	-4.31761	2.01661	0.0437366	1	no
Gm5531	chr1:155721474-155724001	CR_Ileum	GF_Ileum	9.98946	0.505385	-4.30495	1.05166	0.292954	0.786387	no
Bcl2a1b	chr9:89094110-89102676	CR_Ileum	GF_Ileum	0.464548	0.024664	-4.23535	1.69684	0.0897276	0.418965	no
Ccl3	chr11:83461344-83462880	CR_Ileum	GF_Ileum	0.360415	0.0197994	-4.18613	1.54019	0.123514	0.505033	no
Srpx2	chrX:130442964-130466989	CR_Ileum	GF_Ileum	0.081079	0.0044563	-4.18541	0.637072	0.524078	1	no
Nefh	chr11:4838758-4942797	CR_Ileum	GF_Ileum	0.0558871	0.003148	-4.15001	0.0969365	0.922777	1	no
Gsdmc2	chr15:63655810-63743857	CR_Ileum	GF_Ileum	128.707	7.26974	-4.14604	0.780171	0.43529	0.916464	no
Gpr34	chrX:13094207-13423906	CR_Ileum	GF_Ileum	0.246838	0.0139922	-4.14087	0.164987	0.868954	1	no
Kcnmb4	chr10:115854923-115910579	CR_Ileum	GF_Ileum	0.248932	0.0146103	-4.09069	0.865507	0.38676	1	no
2410076I21Rik	chr9:58430046-58589366	CR_Ileum	GF_Ileum	0.28864	0.0171627	-4.07192	0.109727	0.912626	0.999999	no
Cxcr3	chrX:98926874-98929486	CR_Ileum	GF_Ileum	0.278483	0.0168413	-4.04751	1.90365	0.0569561	0.314796	no
Ubash3a	chr17:31345010-31379348	CR_Ileum	GF_Ileum	0.0709279	0.00432949	-4.03408	1.48444	0.137692	1	no
Col27a1	chr4:62876445-62996024	CR_Ileum	GF_Ileum	0.0255694	0.00160894	-3.99024	0.847655	0.39663	1	no
Nlrp9c	chr7:27149905-27179262	CR_Ileum	GF_Ileum	0.00249251	0.000156958	-3.98915	0.246726	0.805121	1	no
Ccdc102a	chr8:97426768-97441998	CR_Ileum	GF_Ileum	0.152608	0.00967327	-3.97968	2.01339	0.0440737	1	no
Ppm1n	chr7:19862155-19865398	CR_Ileum	GF_Ileum	0.13004	0.00828676	-3.972	1.47984	0.138917	1	no
Tlr9	chr9:106124928-106129207	CR_Ileum	GF_Ileum	0.0569487	0.00364707	-3.96485	1.46538	0.142816	1	no
4833423E24Rik	chr2:85324248-85359092	CR_Ileum	GF_Ileum	0.121901	0.00798851	-3.93164	1.44254	0.149151	1	no
Pde1a	chr2:79674609-79969569	CR_Ileum	GF_Ileum	0.00344365	0.000225883	-3.93029	0.0372824	0.97026	1	no
Lrrk2	chr15:91503654-91646555	CR_Ileum	GF_Ileum	0.0222058	0.00148975	-3.8978	1.43683	0.150765	1	no
Cabp5	chr7:13983503-13994227	CR_Ileum	GF_Ileum	0.114136	0.00768133	-3.89325	1.38697	0.16545	1	no
Lrrc8c	chr5:105948489-106037973	CR_Ileum	GF_Ileum	0.332813	0.0226626	-3.87633	2.3751	0.0175442	0.139741	no
Xlr	chrX:51086924-51100873	CR_Ileum	GF_Ileum	0.100987	0.00702428	-3.84568	1.00975	0.312617	1	no
-	chr3:68868566-68870127	CR_Ileum	GF_Ileum	0.124117	0.00870822	-3.83318	1.42142	0.155196	1	no
Psg18	chr7:18931156-18940356	CR_Ileum	GF_Ileum	0.11478	0.00814043	-3.81763	0.806276	0.420084	1	no
Gm19897	chr7:29551770-29573684	CR_Ileum	GF_Ileum	0.0993421	0.00706499	-3.81364	0.161268	0.871883	1	no
-	chr15:77486527-77486827	CR_Ileum	GF_Ileum	4.25367	0.304587	-3.80378	2.0033	0.0451452	0.270394	no
Zfp831	chr2:174469034-174536331	CR_Ileum	GF_Ileum	0.0684344	0.00498341	-3.77952	2.16294	0.030546	1	no
-	chr6:71131656-71132970	CR_Ileum	GF_Ileum	0.145395	0.0106128	-3.7761	1.37295	0.169769	1	no
AI662270	chr11:83037077-83040086	CR_Ileum	GF_Ileum	0.40114	0.029392	-3.77061	1.9982	0.0456945	0.272703	no
Slc19a3	chr1:83009097-83035023	CR_Ileum	GF_Ileum	0.0579225	0.0042969	-3.75276	1.39182	0.163977	1	no
Rftn1	chr17:50132631-50329822	CR_Ileum	GF_Ileum	0.245769	0.0183171	-3.74604	2.15155	0.0314328	1	no
5430405G05Rik	chr2:151527743-151533046	CR_Ileum	GF_Ileum	0.375843	0.0282293	-3.73487	2.13783	0.0325309	0.216189	no
Nprl3	chr11:32126504-32167660	CR_Ileum	GF_Ileum	0.557975	0.0435969	-3.6779	0.134989	0.892621	0.999999	no
Ms4a6b	chr19:11593048-11604893	CR_Ileum	GF_Ileum	0.406139	0.0319115	-3.66982	2.11301	0.0345996	0.225683	no
-	chr7:123691601-123692369	CR_Ileum	GF_Ileum	0.259787	0.0205461	-3.66039	1.35277	0.176128	0.614656	no
Gjc1	chr11:102660791-102681000	CR_Ileum	GF_Ileum	0.00808931	0.000643247	-3.65257	0.0862452	0.931271	1	no
AI504432	chr3:106842421-106857240	CR_Ileum	GF_Ileum	0.168549	0.0134183	-3.6509	2.35205	0.0186701	1	no
S1pr1	chr3:115413350-115417973	CR_Ileum	GF_Ileum	0.0528566	0.00421381	-3.64889	1.33838	0.180773	1	no
Samsn1	chr16:75859038-75909511	CR_Ileum	GF_Ileum	0.18041	0.0144374	-3.6434	1.70605	0.0879988	1	no
Slc2a3	chr6:122677826-122692763	CR_Ileum	GF_Ileum	0.196939	0.0158776	-3.63268	2.21381	0.0268417	1	no
Ccl22	chr8:97269583-97275288	CR_Ileum	GF_Ileum	0.0913284	0.00736961	-3.6314	1.34004	0.180232	1	no
6230409E13Rik	chr4:21858472-21928608	CR_Ileum	GF_Ileum	0.0161826	0.00130884	-3.62808	1.34488	0.178665	1	no
Slamf7	chr1:173562533-173583168	CR_Ileum	GF_Ileum	0.304982	0.0246824	-3.62717	2.7222	0.00648482	0.0665684	no
-	chrX:92194881-92195527	CR_Ileum	GF_Ileum	0.318614	0.0259794	-3.61637	1.33143	0.183046	0.627517	no
-	chr15:77188840-77189634	CR_Ileum	GF_Ileum	0.24116	0.0196695	-3.61596	1.34067	0.180029	1	no
-	chr5:138783520-138787681	CR_Ileum	GF_Ileum	0.188796	0.0154176	-3.61418	2.33697	0.0194406	1	no
Duox2	chr2:122104824-122128621	CR_Ileum	GF_Ileum	135.663	11.0867	-3.61312	0.614583	0.53883	0.971282	no
Gnb4	chr3:32428393-32515457	CR_Ileum	GF_Ileum	0.0569492	0.0046827	-3.60426	0.128219	0.897976	1	no
-	chr17:74229615-74230473	CR_Ileum	GF_Ileum	0.216308	0.0177999	-3.60314	1.32714	0.184462	1	no
-	chr19:53047017-53047580	CR_Ileum	GF_Ileum	0.384541	0.0316782	-3.60157	1.32779	0.184249	0.62972	no
-	chr1:153094335-153094891	CR_Ileum	GF_Ileum	0.391462	0.0322752	-3.60038	1.3169	0.187874	0.636061	no
Sim1	chr10:50615456-50708958	CR_Ileum	GF_Ileum	0.0202305	0.00167154	-3.59728	1.29993	0.193624	1	no
Gbp11	chr5:105752044-105775491	CR_Ileum	GF_Ileum	0.142811	0.0119225	-3.58235	1.15492	0.248122	1	no
-	chr10:8623760-8642894	CR_Ileum	GF_Ileum	0.567153	0.0477214	-3.57103	2.53579	0.0112194	0.100596	no
Acsbg1	chr9:54452803-54509692	CR_Ileum	GF_Ileum	0.219348	0.018508	-3.567	2.03982	0.0413683	1	no
Hist2h2bb	chr3:96073622-96074115	CR_Ileum	GF_Ileum	0.45981	0.0388643	-3.56452	1.29351	0.195835	0.649658	no
Itgad	chr7:135317459-135349880	CR_Ileum	GF_Ileum	0.386139	0.032715	-3.5611	2.73571	0.00622453	0.064559	no
-	chr6:41009365-41009885	CR_Ileum	GF_Ileum	0.595492	0.0508746	-3.54906	1.2934	0.195872	0.64976	no
Ppp2r2c	chr5:37259808-37346317	CR_Ileum	GF_Ileum	0.155312	0.0133138	-3.54417	2.29259	0.0218716	1	no
Fam26f	chr10:33845872-33847778	CR_Ileum	GF_Ileum	0.155358	0.0133566	-3.53997	1.3048	0.191959	1	no
Gsdmc3	chr15:63655810-63743857	CR_Ileum	GF_Ileum	46.4203	4.01741	-3.53042	0.296322	0.766984	0.999999	no
Pik3r6	chr11:68316520-68366200	CR_Ileum	GF_Ileum	0.0451469	0.00394032	-3.51824	0.530311	0.595897	1	no
-	chr3:104441536-104442442	CR_Ileum	GF_Ileum	0.189328	0.0166155	-3.51029	1.30071	0.193357	1	no
Celf2	chr2:6460743-7317825	CR_Ileum	GF_Ileum	0.031134	0.00276062	-3.49543	0.740122	0.459226	1	no
Clnk	chr5:39097698-39267932	CR_Ileum	GF_Ileum	0.193042	0.0171424	-3.49327	1.64051	0.1009	1	no
Smyd1	chr6:71163933-71212275	CR_Ileum	GF_Ileum	0.196738	0.0176033	-3.48236	1.79523	0.0726169	1	no
-	chr12:115641576-115642403	CR_Ileum	GF_Ileum	0.207568	0.018659	-3.47564	1.28374	0.199233	1	no
Kcnab2	chr4:151764852-151851588	CR_Ileum	GF_Ileum	0.321092	0.0290259	-3.46757	2.23077	0.0256966	0.183679	no
Aldh1a3	chr7:73535778-73572363	CR_Ileum	GF_Ileum	0.041231	0.0037276	-3.46741	1.25954	0.207837	1	no
Trerf1	chr17:47277806-47496635	CR_Ileum	GF_Ileum	0.190949	0.0173814	-3.45757	1.86536	0.0621312	1	no
-	chr19:42161246-42162000	CR_Ileum	GF_Ileum	0.229395	0.0210514	-3.44585	1.2643	0.206122	1	no
Cd69	chr6:129217342-129225387	CR_Ileum	GF_Ileum	0.272692	0.0250508	-3.44434	1.80779	0.0706394	0.361048	no
Gata3	chr2:9778704-9800227	CR_Ileum	GF_Ileum	0.0860353	0.00791426	-3.4424	0.948281	0.342987	1	no
-	chr9:51174455-51190552	CR_Ileum	GF_Ileum	0.204819	0.0189841	-3.43149	0.479587	0.631521	1	no
-	chr15:52840682-52842599	CR_Ileum	GF_Ileum	0.149248	0.0138373	-3.43107	1.53008	0.125997	1	no
Ptafr	chr4:132119981-132136781	CR_Ileum	GF_Ileum	0.0789114	0.00732905	-3.42854	1.267	0.205155	1	no
-	chr6:71302905-71329165	CR_Ileum	GF_Ileum	0.223722	0.02082	-3.42566	0.579913	0.561973	1	no
Gbp10	chr5:105505518-105722773	CR_Ileum	GF_Ileum	0.715635	0.067447	-3.4074	1.4846	0.13765	0.537454	no
-	chr17:73644499-73646403	CR_Ileum	GF_Ileum	0.18697	0.0176253	-3.40708	1.6094	0.107529	1	no
-	chr6:41068835-41071822	CR_Ileum	GF_Ileum	0.612737	0.0579601	-3.40214	1.23178	0.218031	0.685453	no
Gm11435	chr11:83325237-83335677	CR_Ileum	GF_Ileum	0.148513	0.0141812	-3.38854	1.58114	0.113846	1	no
Slc36a2	chr11:54971969-54998579	CR_Ileum	GF_Ileum	0.00332002	0.000319447	-3.37754	0.303617	0.76142	1	no
Epgn	chr5:91456542-91464238	CR_Ileum	GF_Ileum	0.163324	0.0157772	-3.37182	1.55604	0.1197	1	no
Foxp3	chrX:7135687-7182546	CR_Ileum	GF_Ileum	0.0370548	0.00358832	-3.36828	0.237015	0.812645	1	no
-	chr10:94469348-94572949	CR_Ileum	GF_Ileum	0.349335	0.0338999	-3.36526	0.575359	0.565049	0.983243	no
Apbb1ip	chr2:22629846-22731173	CR_Ileum	GF_Ileum	0.445221	0.0433743	-3.35961	2.58777	0.00966008	0.0899783	no
-	chr5:106251739-106252679	CR_Ileum	GF_Ileum	0.162711	0.0158676	-3.35816	1.21484	0.224428	1	no
-	chr2:84350828-84352059	CR_Ileum	GF_Ileum	0.234226	0.0229093	-3.3539	1.57572	0.115091	1	no
Il27ra	chr8:86545372-86566474	CR_Ileum	GF_Ileum	0.346896	0.0340126	-3.35036	2.42459	0.0153256	0.126483	no
Trat1	chr16:48734802-48772069	CR_Ileum	GF_Ileum	0.244491	0.0240024	-3.34853	1.21862	0.222989	1	no
Slamf6	chr1:173847667-173873999	CR_Ileum	GF_Ileum	0.0539542	0.00530722	-3.34571	1.22757	0.219609	1	no
-	chr8:93702570-93703531	CR_Ileum	GF_Ileum	0.156845	0.0154384	-3.34474	1.22804	0.219431	1	no
-	chr5:97347348-97348035	CR_Ileum	GF_Ileum	0.241618	0.0238591	-3.34012	1.22003	0.222452	1	no
DXBay18,Gm14685	chrX:70382570-70403738	CR_Ileum	GF_Ileum	0.0232781	0.00231507	-3.32985	0.255833	0.79808	1	no
Vaultrc5	chr18:36961416-36961761	CR_Ileum	GF_Ileum	9.29524	0.931942	-3.31818	2.5282	0.0114648	0.102248	no
AI607873	chr1:175653558-175671940	CR_Ileum	GF_Ileum	0.0362208	0.0036338	-3.31727	1.22024	0.222375	1	no
Kif5c	chr2:49474833-49630298	CR_Ileum	GF_Ileum	0.0358606	0.00360178	-3.31562	1.56015	0.118724	1	no
-	chr5:92373312-92374057	CR_Ileum	GF_Ileum	0.21284	0.0213895	-3.3148	1.21363	0.224889	1	no
Snord15b	chr7:106626406-106632283	CR_Ileum	GF_Ileum	21.8861	2.203	-3.31247	0.0444711	0.964529	0.999999	no
Gm14085	chr2:122252212-122353776	CR_Ileum	GF_Ileum	2.07366	0.208821	-3.31184	0.963504	0.335295	0.833419	no
Acsm2	chr7:126697853-126744208	CR_Ileum	GF_Ileum	0.0187837	0.00189606	-3.3084	0.357987	0.720353	1	no
Sell	chr1:165992206-166010916	CR_Ileum	GF_Ileum	0.17303	0.0177269	-3.28701	1.20484	0.228263	1	no
Tmem154	chr3:84470113-84508497	CR_Ileum	GF_Ileum	0.111106	0.0113882	-3.28632	1.70711	0.0878008	1	no
Duoxa1	chr2:122129284-122139466	CR_Ileum	GF_Ileum	0.288522	0.0296033	-3.28485	1.87472	0.0608314	0.328277	no
-	chr7:39002559-39003388	CR_Ileum	GF_Ileum	0.180827	0.0186011	-3.28115	1.20146	0.229572	1	no
-	chr6:48766064-48766877	CR_Ileum	GF_Ileum	0.184224	0.0190747	-3.27173	1.17559	0.239758	1	no
Ctnna3	chr10:62892845-64466415	CR_Ileum	GF_Ileum	0.0432427	0.00451369	-3.26008	0.684922	0.493393	1	no
Kcna3	chr3:106839079-106841047	CR_Ileum	GF_Ileum	0.192659	0.0201624	-3.25631	1.69643	0.089804	1	no
-	chr6:68220488-68221225	CR_Ileum	GF_Ileum	2.30421	0.241716	-3.25289	1.69702	0.0896933	0.418855	no
-	chr15:39027595-39028768	CR_Ileum	GF_Ileum	0.115484	0.0121268	-3.25142	1.15797	0.246876	1	no
Gsdmcl-ps	chr15:63745706-63892069	CR_Ileum	GF_Ileum	0.285011	0.0299853	-3.24869	0.299713	0.764396	0.999999	no
Ccl4	chr11:83476085-83478185	CR_Ileum	GF_Ileum	0.787408	0.083054	-3.24499	1.92982	0.0536294	0.302821	no
Klre1	chr6:129528303-129535845	CR_Ileum	GF_Ileum	0.155205	0.0164558	-3.2375	1.18097	0.237616	1	no
Fut10	chr8:32297803-32371955	CR_Ileum	GF_Ileum	0.0382345	0.00406104	-3.23495	0.609649	0.542094	1	no
Cd200r4	chr16:44811869-44839263	CR_Ileum	GF_Ileum	0.703187	0.0747535	-3.2337	1.56653	0.117225	0.489809	no
-	chr14:102993462-102994405	CR_Ileum	GF_Ileum	0.147815	0.0158048	-3.22535	1.18874	0.234542	1	no
-	chr11:3095359-3097220	CR_Ileum	GF_Ileum	0.200028	0.0214494	-3.2212	1.69642	0.0898066	1	no
-	chr6:41482982-41498351	CR_Ileum	GF_Ileum	0.349135	0.0374413	-3.22109	0.89147	0.372677	0.868398	no
Il18r1	chr1:40522396-40557743	CR_Ileum	GF_Ileum	1.89687	0.20371	-3.21904	2.15658	0.0310383	0.209434	no
Pla2g2e	chr4:138433591-138438942	CR_Ileum	GF_Ileum	0.334196	0.035974	-3.21567	0.786671	0.431474	0.913616	no
-	chr13:19269785-19270642	CR_Ileum	GF_Ileum	1.83676	0.199319	-3.20401	2.49239	0.0126888	0.110135	no
-	chr8:108212414-108213307	CR_Ileum	GF_Ileum	0.247383	0.0269128	-3.20038	1.17144	0.241424	1	no
-	chr18:12464301-12465015	CR_Ileum	GF_Ileum	0.207351	0.0226421	-3.19499	1.16776	0.242905	1	no
-	chr2:74099274-74100122	CR_Ileum	GF_Ileum	0.16546	0.0180683	-3.19495	1.17536	0.239851	1	no
Bambi-ps1,Slc28a2	chr2:122252212-122353776	CR_Ileum	GF_Ileum	4.85631	0.531828	-3.19083	1.34295	0.179289	0.620906	no
-	chr6:71114645-71115999	CR_Ileum	GF_Ileum	0.359508	0.0393744	-3.1907	1.12964	0.258629	0.74322	no
-	chr19:53034084-53035182	CR_Ileum	GF_Ileum	0.118696	0.0131227	-3.17714	1.16319	0.244752	1	no
Mcoln3	chr3:145780440-145803689	CR_Ileum	GF_Ileum	0.141779	0.0156945	-3.17531	1.00661	0.314121	1	no
Sh2d1b1	chr1:172207454-172215793	CR_Ileum	GF_Ileum	0.25999	0.0288034	-3.17414	1.67749	0.0934464	0.42943	no
Vmn2r18	chr5:152364235-152389499	CR_Ileum	GF_Ileum	0.0490245	0.00544711	-3.16994	1.16657	0.243385	1	no
-	chr1:55307011-55307722	CR_Ileum	GF_Ileum	0.202906	0.0227712	-3.15553	1.14945	0.25037	1	no
-	chr7:65718262-65719639	CR_Ileum	GF_Ileum	0.178759	0.0201041	-3.15246	1.47686	0.139712	1	no
Prss35	chr9:86636433-86650678	CR_Ileum	GF_Ileum	0.742223	0.0836151	-3.15002	2.66339	0.00773569	0.0761539	no
-	chr10:93427666-93428331	CR_Ileum	GF_Ileum	0.220132	0.0249518	-3.14115	1.14133	0.253735	1	no
-	chr7:143859665-143864559	CR_Ileum	GF_Ileum	0.459156	0.0520616	-3.14069	2.27249	0.0230567	0.169837	no
-	chr11:87569087-87570103	CR_Ileum	GF_Ileum	0.50815	0.057668	-3.13941	1.80284	0.0714138	0.363512	no
-	chr4:119341246-119342069	CR_Ileum	GF_Ileum	0.165053	0.0187759	-3.13598	1.12684	0.259811	1	no
Gna15	chr10:80965058-80986970	CR_Ileum	GF_Ileum	0.0593047	0.00674729	-3.13576	1.14652	0.25158	1	no
-	chr8:10883336-10884274	CR_Ileum	GF_Ileum	0.13945	0.0159097	-3.13177	1.14416	0.252557	1	no
6330403K07Rik	chr11:70845442-70847119	CR_Ileum	GF_Ileum	0.0743056	0.00848025	-3.13129	1.15251	0.249113	1	no
F2r	chr13:96371743-96388388	CR_Ileum	GF_Ileum	0.27187	0.0312497	-3.121	2.26291	0.023641	0.173015	no
-	chr15:102998390-102999082	CR_Ileum	GF_Ileum	0.205448	0.0236239	-3.12045	1.12241	0.261686	1	no
A230077H06Rik	chr7:48104522-48153694	CR_Ileum	GF_Ileum	0.052466	0.00605805	-3.11446	1.31388	0.188886	1	no
-	chr10:94469348-94572949	CR_Ileum	GF_Ileum	0.258746	0.0299883	-3.10906	0.30585	0.759719	0.999999	no
Amph	chr13:19040239-19242784	CR_Ileum	GF_Ileum	0.035802	0.0041509	-3.10854	0.478121	0.632564	1	no
-	chr2:57240783-57241534	CR_Ileum	GF_Ileum	0.182472	0.0211629	-3.10806	1.12797	0.259331	1	no
-	chr8:107226557-107362922	CR_Ileum	GF_Ileum	0.320921	0.0374345	-3.09978	0.117606	0.90638	0.999999	no
Traf3ip3	chr1:194999662-195027740	CR_Ileum	GF_Ileum	0.381556	0.0445194	-3.09939	0.608712	0.542715	0.972743	no
Nlrc3	chr16:3946932-3976632	CR_Ileum	GF_Ileum	0.289395	0.0338457	-3.09599	2.33548	0.0195186	0.150983	no
-	chr13:62733284-62734869	CR_Ileum	GF_Ileum	0.0730192	0.00855898	-3.09277	1.13765	0.255265	1	no
Gm14306,Gm14436	chr2:175594788-176850107	CR_Ileum	GF_Ileum	1.74071	0.204311	-3.09084	2.02928	0.0424302	0.259301	no
Ctse	chr1:133534890-133572084	CR_Ileum	GF_Ileum	0.0525799	0.00619296	-3.08581	1.13193	0.257665	1	no
-	chr7:20159731-20160760	CR_Ileum	GF_Ileum	0.120467	0.014195	-3.08518	1.12577	0.260263	1	no
-	chr11:78803027-78804144	CR_Ileum	GF_Ileum	0.108887	0.0128552	-3.0824	1.12083	0.262359	1	no
-	chr14:35475226-35475875	CR_Ileum	GF_Ileum	0.373972	0.0441523	-3.08237	1.13459	0.256549	0.74059	no
Abca6	chr11:110038135-110113090	CR_Ileum	GF_Ileum	0.0200624	0.0023718	-3.08044	0.62574	0.531486	1	no
Gpr18	chr14:122277827-122420257	CR_Ileum	GF_Ileum	1.02723	0.121493	-3.07981	0.43476	0.663737	0.999999	no
Arhgef6	chrX:54484661-54591906	CR_Ileum	GF_Ileum	0.308027	0.0367053	-3.069	2.24316	0.0248863	0.179568	no
Crb1	chr1:141094830-141273653	CR_Ileum	GF_Ileum	0.0222531	0.00265322	-3.06818	1.11813	0.263511	1	no
-	chr4:94832471-94834810	CR_Ileum	GF_Ileum	0.0465867	0.00556342	-3.06587	1.12337	0.261281	1	no
Fli1	chr9:32229792-32348953	CR_Ileum	GF_Ileum	0.207472	0.0247776	-3.06581	1.9332	0.0532113	1	no
-	chr11:88885369-88887540	CR_Ileum	GF_Ileum	0.302588	0.0362038	-3.06315	1.99972	0.0455306	0.272018	no
-	chr6:121060046-121060149	CR_Ileum	GF_Ileum	410.211	49.1919	-3.05987	1.78594	0.0741091	0.371946	no
-	chr13:19276795-19277370	CR_Ileum	GF_Ileum	1.32968	0.159658	-3.05803	1.80991	0.0703101	0.359956	no
-	chr7:20430164-20430872	CR_Ileum	GF_Ileum	0.189898	0.0229017	-3.0517	1.12347	0.261237	1	no
Il2rg	chrX:98449749-98494273	CR_Ileum	GF_Ileum	1.60171	0.193794	-3.04702	0.344664	0.730347	0.999999	no
-	chr14:74001802-74002600	CR_Ileum	GF_Ileum	0.161109	0.0195412	-3.04344	1.09133	0.275126	1	no
Capn13	chr17:73655794-73748636	CR_Ileum	GF_Ileum	41.4644	5.04702	-3.03837	2.69059	0.00713255	0.071624	no
Ikzf1	chr11:11585729-11672929	CR_Ileum	GF_Ileum	0.557949	0.0679887	-3.03677	2.69252	0.00709135	0.0712958	no
-	chr13:41787398-41791784	CR_Ileum	GF_Ileum	0.314236	0.0383083	-3.03612	1.71299	0.0867151	0.410286	no
Igj	chr5:88948833-88956922	CR_Ileum	GF_Ileum	0.370333	0.0452361	-3.03328	2.04043	0.0413071	0.254991	no
Klf8	chrX:149672587-149830677	CR_Ileum	GF_Ileum	0.0233803	0.00287035	-3.02599	0.459913	0.645579	1	no
2410007B07Rik	chr3:75451362-75459653	CR_Ileum	GF_Ileum	0.115248	0.0141615	-3.0247	1.11024	0.266894	1	no
Pou2f2	chr7:25875875-25917479	CR_Ileum	GF_Ileum	0.0841433	0.010388	-3.01792	1.17746	0.239011	1	no
H2-Ob	chr17:34375849-34382853	CR_Ileum	GF_Ileum	0.155976	0.0192899	-3.0154	1.71256	0.0867938	1	no
S1pr3	chr13:51503986-51518166	CR_Ileum	GF_Ileum	0.0675227	0.00836327	-3.01323	1.57366	0.115567	1	no
Cxcr4	chr1:130484775-130488876	CR_Ileum	GF_Ileum	0.118714	0.0147121	-3.01241	1.39676	0.162487	1	no
-	chr9:115239696-115240859	CR_Ileum	GF_Ileum	0.0986269	0.0122508	-3.0091	1.10544	0.268968	1	no
Xlr4b	chrX:70459703-70467792	CR_Ileum	GF_Ileum	0.320689	0.039982	-3.00375	1.14456	0.252392	0.735304	no
Slamf8	chr1:174511507-174520699	CR_Ileum	GF_Ileum	0.0534761	0.00671548	-2.99333	1.11697	0.264006	1	no
Fcrlb	chr1:172837403-172843072	CR_Ileum	GF_Ileum	0.0867924	0.0109024	-2.99292	1.08092	0.279731	1	no
DXBay18,Gm14685	chrX:70352973-70374599	CR_Ileum	GF_Ileum	0.0184258	0.00231507	-2.9926	0.22949	0.818488	1	no
Cd200r1	chr16:44765846-44801271	CR_Ileum	GF_Ileum	0.457765	0.0575535	-2.99163	1.72543	0.0844509	0.404022	no
Gpx8	chr13:113832970-113836596	CR_Ileum	GF_Ileum	0.114495	0.014417	-2.98944	1.07943	0.280394	1	no
Gimap7	chr6:48668619-48674635	CR_Ileum	GF_Ileum	1.45158	0.18361	-2.98291	2.61628	0.00888927	0.0844885	no
Cst7	chr2:150396150-150404680	CR_Ileum	GF_Ileum	0.774889	0.0980618	-2.98223	2.15359	0.0312727	0.210542	no
Amac1	chr11:69573386-69609439	CR_Ileum	GF_Ileum	0.0720206	0.009119	-2.98146	0.18424	0.853825	1	no
Tas1r2	chr4:139209452-139226194	CR_Ileum	GF_Ileum	0.0330688	0.00418877	-2.98087	1.09243	0.274646	1	no
-	chr9:69910341-69911370	CR_Ileum	GF_Ileum	0.224068	0.0283901	-2.98048	1.39495	0.16303	1	no
Napsa	chr7:51827814-51842216	CR_Ileum	GF_Ileum	0.392506	0.0497474	-2.98002	2.01852	0.0435375	0.263738	no
-	chr17:6465213-6465876	CR_Ileum	GF_Ileum	0.19767	0.0250562	-2.97986	1.06239	0.288058	1	no
Sec14l4	chr11:3931784-3948961	CR_Ileum	GF_Ileum	0.0342227	0.00434675	-2.97694	0.506629	0.612415	1	no
Stx11	chr10:12659786-12684065	CR_Ileum	GF_Ileum	0.127616	0.01626	-2.97241	1.29343	0.195862	1	no
-	chr4:70861676-70862683	CR_Ileum	GF_Ileum	0.114141	0.0145748	-2.96927	1.08003	0.280128	1	no
-	chr6:41482982-41498351	CR_Ileum	GF_Ileum	6.52245	0.833936	-2.96741	1.82715	0.0676765	0.351404	no
Pld5	chr1:177892436-178205443	CR_Ileum	GF_Ileum	0.0303042	0.0038881	-2.96238	0.348522	0.727448	1	no
-	chr15:25232711-25234394	CR_Ileum	GF_Ileum	0.406332	0.0521657	-2.96149	2.1163	0.0343195	0.224449	no
Prf1	chr10:60760583-60767011	CR_Ileum	GF_Ileum	0.209361	0.0269873	-2.95564	1.90395	0.0569166	1	no
-	chr6:48810082-48813329	CR_Ileum	GF_Ileum	0.304412	0.0393214	-2.95264	0.718574	0.472404	0.939576	no
Adh4	chr3:138078450-138095498	CR_Ileum	GF_Ileum	0.611314	0.0794073	-2.94457	1.57603	0.115019	0.48464	no
-	chr8:112510032-112523704	CR_Ileum	GF_Ileum	0.403517	0.0526457	-2.93824	0.531383	0.595154	0.994531	no
-	chr8:93699833-93700779	CR_Ileum	GF_Ileum	0.240966	0.0314851	-2.93609	1.37074	0.170455	1	no
-	chr11:89719624-89746013	CR_Ileum	GF_Ileum	1.90225	0.248592	-2.93586	2.67758	0.00741571	0.0737557	no
-	chr5:53492033-53494663	CR_Ileum	GF_Ileum	0.418744	0.054725	-2.9358	2.34429	0.0190631	0.148517	no
Cd2	chr3:101079830-101091862	CR_Ileum	GF_Ileum	0.191039	0.0249869	-2.93463	1.37532	0.169032	1	no
-	chr1:123237454-123238826	CR_Ileum	GF_Ileum	0.0770926	0.0100944	-2.93304	1.05936	0.289436	1	no
Lax1	chr1:135575605-135586685	CR_Ileum	GF_Ileum	0.209121	0.02741	-2.93157	1.52479	0.127312	1	no
Filip1l	chr16:57302112-57606982	CR_Ileum	GF_Ileum	0.270043	0.0354351	-2.92994	6.76e-05	0.999946	0.999999	no
Bambi-ps1	chr2:122252212-122353776	CR_Ileum	GF_Ileum	9.37133	1.23025	-2.9293	1.2964	0.194839	0.64821	no
Cldn11	chr3:31048841-31063248	CR_Ileum	GF_Ileum	0.054015	0.00710318	-2.92682	1.06753	0.285734	1	no
-	chr7:117438841-117442640	CR_Ileum	GF_Ileum	0.164954	0.0217246	-2.92466	2.0535	0.0400243	1	no
-	chr6:78410275-78411326	CR_Ileum	GF_Ileum	0.104066	0.0138346	-2.91115	1.04638	0.295386	1	no
Gm5936	chrX:72082534-72088694	CR_Ileum	GF_Ileum	0.0644412	0.00859086	-2.90711	1.3812	0.167217	1	no
-	chr7:112960570-113471059	CR_Ileum	GF_Ileum	0.401294	0.0535639	-2.90533	0.0306725	0.975531	0.999999	no
-	chr11:118908879-118909536	CR_Ileum	GF_Ileum	0.188965	0.0253744	-2.89667	1.02583	0.304972	1	no
Dnase1	chr16:4037144-4077810	CR_Ileum	GF_Ileum	12.8099	1.73119	-2.88742	1.24267	0.213988	0.679332	no
Fam131b	chr6:42265310-42274639	CR_Ileum	GF_Ileum	0.0227804	0.00308821	-2.88295	0.434808	0.663702	1	no
Pfkfb3	chr2:11393039-11475556	CR_Ileum	GF_Ileum	0.265691	0.036037	-2.8822	1.6552	0.0978832	0.441713	no
Zfp454	chr11:50686224-50700945	CR_Ileum	GF_Ileum	0.0471477	0.00640476	-2.87997	1.05199	0.292804	1	no
Kctd12b	chrX:150119696-150130823	CR_Ileum	GF_Ileum	0.0382612	0.00519941	-2.87946	1.33964	0.180363	1	no
Plb1	chr5:32535066-32671247	CR_Ileum	GF_Ileum	161.916	22.0998	-2.87314	2.33557	0.0195137	0.150963	no
Tceal3	chrX:133200913-133202916	CR_Ileum	GF_Ileum	0.00973673	0.00133296	-2.8688	0.341064	0.733055	1	no
-	chr10:94469348-94572949	CR_Ileum	GF_Ileum	0.314498	0.0430866	-2.86774	0.27589	0.782633	0.999999	no
Gimap6	chr6:48651581-48658243	CR_Ileum	GF_Ileum	2.29295	0.314608	-2.86558	2.68889	0.00716911	0.0718986	no
-	chr14:67787564-67788563	CR_Ileum	GF_Ileum	0.213468	0.0294359	-2.85837	1.33532	0.181773	1	no
Fam65a	chr8:108129128-108146118	CR_Ileum	GF_Ileum	12.2364	1.68775	-2.858	0.258602	0.795943	0.999999	no
4930412C18Rik	chr4:9697731-9750558	CR_Ileum	GF_Ileum	0.0233641	0.00322306	-2.85779	0.432533	0.665354	1	no
-	chr1:187362413-187365317	CR_Ileum	GF_Ileum	1.04256	0.143836	-2.85763	1.77772	0.0754502	0.376172	no
Frzb	chr2:80252126-80287553	CR_Ileum	GF_Ileum	0.0315435	0.00438172	-2.84777	1.03373	0.301263	1	no
-	chr13:19428248-19429450	CR_Ileum	GF_Ileum	0.905915	0.126048	-2.8454	2.21468	0.0267818	0.188961	no
Klrb1b	chr6:128763723-128776333	CR_Ileum	GF_Ileum	0.0424851	0.00591193	-2.84526	1.03846	0.299057	1	no
-	chr2:131354844-131356005	CR_Ileum	GF_Ileum	0.176349	0.0245518	-2.84454	1.33299	0.182534	1	no
-	chr19:5830243-5845530	CR_Ileum	GF_Ileum	0.204767	0.0285134	-2.84428	0.0292214	0.976688	1	no
Il2rb	chr15:78309650-78325529	CR_Ileum	GF_Ileum	1.9262	0.270786	-2.83053	2.36531	0.0180148	0.142473	no
-	chr7:108673977-108675211	CR_Ileum	GF_Ileum	0.142711	0.0200646	-2.83037	1.03257	0.301806	1	no
-	chr14:54788372-54843876	CR_Ileum	GF_Ileum	2.54099	0.359058	-2.8231	2.35773	0.0183868	0.144705	no
Slco5a1	chr1:12856630-12981216	CR_Ileum	GF_Ileum	0.0305568	0.00431841	-2.82292	1.44853	0.147469	1	no
Gm15319	chr8:19933241-19958780	CR_Ileum	GF_Ileum	0.0363323	0.00514545	-2.81989	1.02499	0.305367	1	no
-	chr7:113647848-113648992	CR_Ileum	GF_Ileum	0.749031	0.1063	-2.81689	2.02066	0.0433149	0.26287	no
-	chr7:113652094-113653382	CR_Ileum	GF_Ileum	0.592276	0.084303	-2.81261	2.14123	0.0322556	0.21499	no
Wnt5a	chr14:29318153-29340569	CR_Ileum	GF_Ileum	0.424486	0.0612917	-2.79195	1.27802	0.201244	0.659271	no
Sprr2b	chr3:92120626-92122007	CR_Ileum	GF_Ileum	1.19071	0.172114	-2.79039	2.0657	0.0388566	0.244235	no
Vax2	chr6:83642799-83688298	CR_Ileum	GF_Ileum	0.079033	0.0114328	-2.78928	0.589129	0.555775	1	no
Krt27	chr11:99206879-99212408	CR_Ileum	GF_Ileum	0.174254	0.0252258	-2.78823	1.5909	0.111633	1	no
Kndc1	chr7:147080594-147127439	CR_Ileum	GF_Ileum	0.011622	0.00168375	-2.78711	1.00659	0.314131	1	no
Hamp	chr7:31711934-31742600	CR_Ileum	GF_Ileum	0.391277	0.0571692	-2.77488	0.0937167	0.925334	0.999999	no
Cd53	chr3:106561778-106593067	CR_Ileum	GF_Ileum	0.526933	0.077074	-2.7733	2.45736	0.0139963	0.118414	no
-	chr5:66400065-66400862	CR_Ileum	GF_Ileum	0.266738	0.0391462	-2.76848	1.27872	0.200995	0.658746	no
Hoxa2	chr6:52108435-52114830	CR_Ileum	GF_Ileum	0.075829	0.0111295	-2.76837	0.676318	0.498839	1	no
Rdx	chr9:51810165-51896843	CR_Ileum	GF_Ileum	0.605567	0.0891243	-2.7644	2.49337	0.0126536	0.109907	no
Gm10696	chr3:93978333-93982115	CR_Ileum	GF_Ileum	0.0394744	0.0058116	-2.76391	1.00801	0.31345	1	no
-	chr1:123239871-123242827	CR_Ileum	GF_Ileum	0.357722	0.052675	-2.76365	2.26437	0.0235511	0.172541	no
Cysltr2	chr14:73428934-73448921	CR_Ileum	GF_Ileum	0.104177	0.0153623	-2.76157	0.81802	0.413346	1	no
A830018L16Rik	chr1:11404185-11965983	CR_Ileum	GF_Ileum	0.0187732	0.00276933	-2.76106	0.598832	0.549285	1	no
Pigz	chr16:31933936-31946132	CR_Ileum	GF_Ileum	0.131717	0.0194687	-2.75822	1.62021	0.105187	1	no
Mbl2	chr19:30307446-30314172	CR_Ileum	GF_Ileum	1.56908	0.232992	-2.75156	2.4043	0.0162034	0.13176	no
Cpne7	chr8:125641273-125659085	CR_Ileum	GF_Ileum	0.0362684	0.00539805	-2.7482	1.00228	0.316208	1	no
-	chr1:107120187-107120756	CR_Ileum	GF_Ileum	0.20878	0.0311838	-2.74312	0.970521	0.331787	1	no
Serpinb6b	chr13:33057381-33070906	CR_Ileum	GF_Ileum	0.287319	0.0429878	-2.74065	1.71874	0.0856612	0.407295	no
Klk8	chr7:51052946-51059192	CR_Ileum	GF_Ileum	0.277487	0.0421526	-2.71873	1.53972	0.123629	0.505227	no
B930025P03Rik	chr8:10870421-10882692	CR_Ileum	GF_Ileum	0.0815453	0.0123973	-2.71758	0.987152	0.323568	1	no
Atp2b4	chr1:135599650-135697319	CR_Ileum	GF_Ileum	0.197715	0.0301111	-2.71505	2.309	0.0209437	1	no
Itgae	chr11:72904096-72961084	CR_Ileum	GF_Ileum	3.28032	0.499599	-2.715	1.9374	0.0526968	0.299575	no
Gm12250	chr11:57997184-58005895	CR_Ileum	GF_Ileum	1.89315	0.288991	-2.71169	2.55794	0.0105296	0.0960662	no
-	chr5:99641483-99642407	CR_Ileum	GF_Ileum	0.318137	0.0486329	-2.70964	1.37254	0.169896	0.602958	no
AF357359,Rian	chr12:110842154-110899921	CR_Ileum	GF_Ileum	0.054273	0.00834834	-2.70067	0.806142	0.420161	1	no
Cpxm2	chr7:139234492-139346424	CR_Ileum	GF_Ileum	0.070239	0.0108259	-2.69778	1.4199	0.155638	1	no
Gml	chr15:74643884-74649245	CR_Ileum	GF_Ileum	1.47233	0.227125	-2.69654	2.05104	0.0402634	0.250609	no
Mgat2	chr12:70285144-70288938	CR_Ileum	GF_Ileum	5.31428	0.822069	-2.69254	0.687076	0.492035	0.948682	no
A530064D06Rik	chr17:48288845-48304207	CR_Ileum	GF_Ileum	0.0503229	0.00782669	-2.68474	0.425616	0.670387	1	no
Gbp8	chr5:105443171-105482631	CR_Ileum	GF_Ileum	5.36322	0.834578	-2.68398	2.83545	0.00457607	0.0508065	no
Gm4980	chr7:106772576-106775613	CR_Ileum	GF_Ileum	0.161988	0.0252119	-2.68371	1.68618	0.0917608	1	no
-	chr1:153094941-153095463	CR_Ileum	GF_Ileum	0.454822	0.071053	-2.67833	1.21303	0.225118	0.69674	no
Lilrb3	chr7:3664106-3671984	CR_Ileum	GF_Ileum	0.0301416	0.00471251	-2.67719	0.972522	0.330791	1	no
Zap70	chr1:36818705-36839661	CR_Ileum	GF_Ileum	1.01212	0.158427	-2.67549	1.98835	0.0467728	0.276697	no
Il7r	chr15:9435913-9459631	CR_Ileum	GF_Ileum	0.182301	0.0286574	-2.66935	1.52869	0.126342	1	no
-	chr13:67112468-67113303	CR_Ileum	GF_Ileum	0.234225	0.0368589	-2.66781	1.24066	0.214733	1	no
Apobr	chr7:133714913-133732606	CR_Ileum	GF_Ileum	0.249264	0.0392823	-2.66572	0.595055	0.551807	1	no
-	chr1:159421313-159422711	CR_Ileum	GF_Ileum	0.0739254	0.0116665	-2.6637	0.96358	0.335256	1	no
Gm5464	chr14:67487686-67489842	CR_Ileum	GF_Ileum	0.0384981	0.00613317	-2.65008	0.964204	0.334944	1	no
Slc18a3	chr14:33220632-33279227	CR_Ileum	GF_Ileum	0.241289	0.0385614	-2.64554	1.0017	0.31649	1	no
Cd5	chr19:10792632-10813464	CR_Ileum	GF_Ileum	0.196403	0.0314058	-2.64471	1.75675	0.0789602	1	no
-	chr2:102979273-102983214	CR_Ileum	GF_Ileum	0.36294	0.0580982	-2.64317	2.36196	0.0181786	0.143391	no
Ptprcap	chr19:4154219-4163359	CR_Ileum	GF_Ileum	2.32424	0.372762	-2.64043	0.190234	0.849126	0.999999	no
Ccdc88a	chr11:29273774-29410811	CR_Ileum	GF_Ileum	0.04116	0.00660189	-2.64029	1.61119	0.107137	1	no
Cd8b1	chr6:71272797-71288049	CR_Ileum	GF_Ileum	0.507092	0.0815722	-2.6361	1.69968	0.0891912	0.417441	no
Gm14492	chr7:149646744-149701914	CR_Ileum	GF_Ileum	0.0360795	0.00581724	-2.63277	0.358966	0.719621	1	no
Kcnj13	chr1:89223572-89347385	CR_Ileum	GF_Ileum	5.14002	0.829248	-2.6319	0.272981	0.784868	0.999999	no
-	chr18:38325794-38326780	CR_Ileum	GF_Ileum	0.185289	0.0299135	-2.63091	1.21854	0.223019	1	no
-	chr14:26178012-26178934	CR_Ileum	GF_Ileum	0.20132	0.0325099	-2.63054	1.2102	0.226202	1	no
Lypd3	chr7:25421588-25426137	CR_Ileum	GF_Ileum	0.0513324	0.00829824	-2.62899	0.941299	0.346552	1	no
-	chr9:53480211-53481076	CR_Ileum	GF_Ileum	0.108968	0.0176168	-2.62889	0.951811	0.341193	1	no
-	chr7:113653488-113653902	CR_Ileum	GF_Ileum	0.334995	0.0541888	-2.62807	0.973035	0.330536	0.828213	no
Dcc	chr18:71413285-72510723	CR_Ileum	GF_Ileum	0.00730237	0.00118197	-2.62718	0.954789	0.339684	1	no
Sash3	chrX:45499703-45514740	CR_Ileum	GF_Ileum	0.912367	0.147773	-2.62623	2.83197	0.00462618	0.0512681	no
Speg	chr1:75371871-75439751	CR_Ileum	GF_Ileum	0.0152307	0.00247116	-2.62373	0.108826	0.913341	1	no
-	chr19:56859236-56860777	CR_Ileum	GF_Ileum	0.191135	0.0310738	-2.62082	1.53588	0.124568	1	no
Hsd11b1	chr1:195047834-195090239	CR_Ileum	GF_Ileum	0.126586	0.0206222	-2.61784	0.779489	0.435692	1	no
-	chr17:14363469-14380890	CR_Ileum	GF_Ileum	0.80848	0.131972	-2.61498	0.311329	0.75555	0.999999	no
Inhbc	chr10:126793381-126807600	CR_Ileum	GF_Ileum	0.0411148	0.00672081	-2.61295	0.928956	0.352912	1	no
Pyhin1	chr1:175560989-175578059	CR_Ileum	GF_Ileum	0.127989	0.0209525	-2.61082	1.65838	0.0972407	1	no
Mn1	chr5:111847185-111886045	CR_Ileum	GF_Ileum	0.274717	0.0450921	-2.607	2.55092	0.0107438	0.097473	no
Klrd1	chr6:129538106-129548793	CR_Ileum	GF_Ileum	2.58162	0.426151	-2.59884	1.02959	0.303203	0.797774	no
Was	chrX:7658591-7667617	CR_Ileum	GF_Ileum	0.501124	0.0827799	-2.59782	2.20587	0.0273929	0.191968	no
Ptgfr	chr3:151461573-151500492	CR_Ileum	GF_Ileum	0.00509177	0.000844457	-2.59207	0.51763	0.604717	1	no
Pglyrp2	chr17:32549873-32561117	CR_Ileum	GF_Ileum	0.372997	0.0619681	-2.58956	1.71889	0.0856344	0.407255	no
Runx3	chr4:134676559-134733905	CR_Ileum	GF_Ileum	0.589024	0.0978884	-2.58912	2.77545	0.0055126	0.0588089	no
-	chr6:99474911-99475545	CR_Ileum	GF_Ileum	0.160427	0.0266732	-2.58845	0.933969	0.35032	1	no
Ifitm1	chr7:148153327-148155726	CR_Ileum	GF_Ileum	0.896098	0.149328	-2.58518	1.29621	0.194903	0.648286	no
-	chr3:132774674-132897899	CR_Ileum	GF_Ileum	0.271846	0.0453699	-2.58298	0.252984	0.800281	0.999999	no
Pcdhb22	chr18:37089938-38001526	CR_Ileum	GF_Ileum	0.0247688	0.00415826	-2.57447	0.165803	0.868312	1	no
D16Ertd472e	chr16:78540582-78576913	CR_Ileum	GF_Ileum	0.145363	0.0244078	-2.57425	2.00504	0.0449592	1	no
Fam159b	chr13:105635362-105653973	CR_Ileum	GF_Ileum	0.0634092	0.0106505	-2.57377	0.927061	0.353895	1	no
-	chr7:152080104-152081608	CR_Ileum	GF_Ileum	0.162216	0.0272533	-2.57341	1.33671	0.181317	1	no
Dclk2	chr3:86590071-86724806	CR_Ileum	GF_Ileum	0.0184635	0.00310317	-2.57286	0.515561	0.606161	1	no
-	chr5:106253548-106254675	CR_Ileum	GF_Ileum	0.151096	0.0254376	-2.57043	1.18936	0.234296	1	no
Pnpla3	chr15:83998245-84019951	CR_Ileum	GF_Ileum	0.275468	0.0465206	-2.56594	2.32621	0.0200076	0.153538	no
Cend1	chr7:148612349-148615319	CR_Ileum	GF_Ileum	1.24798	0.211112	-2.56351	2.50799	0.012142	0.106761	no
-	chr10:94469348-94572949	CR_Ileum	GF_Ileum	0.30143	0.0510154	-2.56281	0.272589	0.785169	0.999999	no
-	chr14:54767795-54769103	CR_Ileum	GF_Ileum	0.420988	0.0713249	-2.5613	1.70986	0.0872911	0.412063	no
-	chr15:52842962-52845563	CR_Ileum	GF_Ileum	0.220585	0.0374034	-2.56009	1.8105	0.0702176	1	no
-	chr19:5830243-5845530	CR_Ileum	GF_Ileum	0.160946	0.0272911	-2.56007	0.0368109	0.970636	1	no
Ptpn7	chr1:137029301-137041897	CR_Ileum	GF_Ileum	0.260178	0.0441473	-2.5591	2.17669	0.0295037	0.202305	no
A630033H20Rik	chrX:104344265-104369000	CR_Ileum	GF_Ileum	0.0251234	0.00426348	-2.55893	0.317203	0.751089	1	no
-	chr10:94456561-94459644	CR_Ileum	GF_Ileum	0.219169	0.0372177	-2.55798	1.78375	0.0744645	1	no
Cd8a	chr6:71302905-71329165	CR_Ileum	GF_Ileum	3.81383	0.649186	-2.55454	2.81299	0.00490837	0.0537785	no
-	chr15:63902654-63904508	CR_Ileum	GF_Ileum	0.209701	0.0358989	-2.54632	1.54449	0.122469	1	no
-	chr8:74198930-74199755	CR_Ileum	GF_Ileum	0.109269	0.0187172	-2.54545	0.926569	0.35415	1	no
Olr1	chr6:129435265-129457183	CR_Ileum	GF_Ileum	0.0206367	0.00354251	-2.54237	0.916456	0.359428	1	no
Gng2	chr14:20691780-20796471	CR_Ileum	GF_Ileum	0.40658	0.0697958	-2.54233	2.27596	0.0228483	0.168837	no
Rd3	chr1:193801253-193812163	CR_Ileum	GF_Ileum	0.0201584	0.0034614	-2.54195	0.384078	0.700921	1	no
Serp2	chr14:76932618-76956705	CR_Ileum	GF_Ileum	1.00672	0.173708	-2.53493	1.48848	0.136625	0.535183	no
EU599041	chr7:50469408-50482212	CR_Ileum	GF_Ileum	0.010576	0.00183133	-2.52983	0.355113	0.722505	1	no
-	chr6:131245890-131303793	CR_Ileum	GF_Ileum	1.59977	0.277266	-2.52852	0.153557	0.877959	0.999999	no
-	chr12:45421335-45422227	CR_Ileum	GF_Ileum	0.195439	0.0338887	-2.52784	1.16437	0.244273	1	no
Itm2a	chrX:104592533-104598699	CR_Ileum	GF_Ileum	0.0472735	0.00828104	-2.51315	0.905352	0.365279	1	no
-	chr13:96675854-96688523	CR_Ileum	GF_Ileum	0.262065	0.0459824	-2.51077	1.62801	0.103522	0.457066	no
Arhgdib	chr6:136872176-136890238	CR_Ileum	GF_Ileum	3.04163	0.533912	-2.51017	1.95175	0.0509678	0.292985	no
Rasgrp3	chr17:75835244-75928393	CR_Ileum	GF_Ileum	0.196947	0.0345809	-2.50976	1.87308	0.0610571	1	no
-	chr1:100084302-100085180	CR_Ileum	GF_Ileum	0.195708	0.034573	-2.50098	1.08038	0.279972	1	no
BC013712	chr4:132338271-132352279	CR_Ileum	GF_Ileum	0.228186	0.0403504	-2.49956	1.99886	0.0456231	1	no
-	chrX:21194163-21195672	CR_Ileum	GF_Ileum	0.179756	0.0318125	-2.49837	1.4099	0.15857	1	no
Bcl2l10	chr9:75195564-75199447	CR_Ileum	GF_Ileum	0.0648754	0.0114876	-2.4976	0.888063	0.374507	1	no
-	chr18:64346817-64351713	CR_Ileum	GF_Ileum	0.383494	0.0680291	-2.49498	1.17166	0.241332	0.719681	no
Tekt2	chr4:125999364-126002443	CR_Ileum	GF_Ileum	0.0515837	0.00915383	-2.49447	0.908176	0.363785	1	no
Rgs9	chr11:109086668-109159495	CR_Ileum	GF_Ileum	0.13424	0.0239746	-2.48523	1.31775	0.187588	1	no
-	chr1:193920875-193921391	CR_Ileum	GF_Ileum	0.404084	0.0723386	-2.48182	1.14024	0.254186	0.737196	no
Prkcb	chr7:129432638-129777915	CR_Ileum	GF_Ileum	0.21197	0.0380119	-2.47934	2.34928	0.0188099	1	no
Gm3383	chr14:5671163-5681081	CR_Ileum	GF_Ileum	0.0504456	0.00905503	-2.47794	0.592901	0.553247	1	no
Gm3383	chr14:5923635-5933553	CR_Ileum	GF_Ileum	0.0504456	0.00905503	-2.47794	0.592901	0.553247	1	no
Gm3383	chr14:6727191-6737109	CR_Ileum	GF_Ileum	0.0504456	0.00905503	-2.47794	0.592901	0.553247	1	no
-	chr2:172885630-172886807	CR_Ileum	GF_Ileum	0.133879	0.0241559	-2.47048	1.12358	0.261191	1	no
-	chr14:50296463-50297351	CR_Ileum	GF_Ileum	0.0940022	0.0170407	-2.46371	0.886512	0.375342	1	no
Ldoc1l	chr15:84383827-84388253	CR_Ileum	GF_Ileum	0.175283	0.0317845	-2.46329	2.05605	0.0397773	1	no
Artn	chr4:117598766-117602368	CR_Ileum	GF_Ileum	0.069173	0.012561	-2.46126	0.73642	0.461475	1	no
-	chr4:94835889-94836884	CR_Ileum	GF_Ileum	0.202014	0.0366894	-2.46102	1.21983	0.222529	1	no
4632428N05Rik	chr10:59766021-60159238	CR_Ileum	GF_Ileum	0.43537	0.0796047	-2.45132	2.40704	0.0160825	0.131075	no
Fam101a	chr5:125483833-125493611	CR_Ileum	GF_Ileum	1.05884	0.194352	-2.44574	2.36194	0.0181795	0.143393	no
Rgs20	chr1:4899656-5060366	CR_Ileum	GF_Ileum	0.044038	0.00809641	-2.44339	0.411406	0.680775	1	no
-	chr4:108100824-108102101	CR_Ileum	GF_Ileum	0.118805	0.0219446	-2.43666	1.11489	0.264896	1	no
Ren1,Ren2	chr1:135247142-135256900	CR_Ileum	GF_Ileum	0.0524393	0.00968635	-2.43662	0.377853	0.70554	1	no
Spag6	chr16:16753108-16829456	CR_Ileum	GF_Ileum	0.028424	0.00525371	-2.4357	0.883116	0.377174	1	no
Gdf11	chr10:128320921-128328774	CR_Ileum	GF_Ileum	0.112198	0.0207787	-2.43288	1.35554	0.175246	1	no
Tgtp2	chr11:48851161-48948889	CR_Ileum	GF_Ileum	0.431384	0.0799067	-2.43258	0.632611	0.526987	0.966271	no
-	chr13:19302119-19355407	CR_Ileum	GF_Ileum	4.00666	0.74232	-2.43229	1.99654	0.0458747	0.27328	no
Prrt1	chr17:34766506-34770072	CR_Ileum	GF_Ileum	0.731306	0.13574	-2.42963	2.16036	0.0307448	0.208086	no
-	chr13:53111217-53113861	CR_Ileum	GF_Ileum	1.12603	0.211232	-2.41435	1.81481	0.0695531	0.357632	no
Clec12a	chr6:129300261-129315321	CR_Ileum	GF_Ileum	0.0313132	0.00588291	-2.41217	0.866444	0.386247	1	no
P2ry10	chrX:104284673-104300309	CR_Ileum	GF_Ileum	0.237252	0.0447249	-2.40727	1.84541	0.0649773	1	no
Srgn	chr10:61957175-61970503	CR_Ileum	GF_Ileum	2.81255	0.530353	-2.40685	2.56634	0.0102777	0.0943151	no
-	chr10:129687262-129688915	CR_Ileum	GF_Ileum	0.129851	0.0244878	-2.40672	1.24575	0.212858	1	no
Il12rb1	chr8:73332347-73345547	CR_Ileum	GF_Ileum	0.233534	0.044042	-2.40668	1.53258	0.125379	1	no
Rhoj	chr12:76409299-76502442	CR_Ileum	GF_Ileum	0.0292196	0.00551478	-2.40556	0.858382	0.390682	1	no
Slc13a4	chr6:35217952-35258126	CR_Ileum	GF_Ileum	0.0195795	0.0036977	-2.40464	0.852197	0.394105	1	no
Fam71b	chr11:46218231-46221484	CR_Ileum	GF_Ileum	0.0317191	0.00599173	-2.40431	0.848197	0.396328	1	no
Myo1f	chr17:33692651-33744709	CR_Ileum	GF_Ileum	0.571037	0.107944	-2.4033	2.63001	0.00853813	0.0819967	no
-	chr13:19396539-19403172	CR_Ileum	GF_Ileum	5.19593	0.982956	-2.40218	2.23023	0.0257319	0.183837	no
Gpr132	chr12:114089086-114099127	CR_Ileum	GF_Ileum	0.347455	0.0657394	-2.402	1.99481	0.0460633	0.273995	no
Rhoh	chr5:66254807-66287939	CR_Ileum	GF_Ileum	0.155765	0.0295146	-2.39987	1.99272	0.0462925	1	no
Spn	chr7:134276977-134281331	CR_Ileum	GF_Ileum	0.61847	0.117299	-2.39851	2.56227	0.0103989	0.095164	no
-	chr8:26214124-26215138	CR_Ileum	GF_Ileum	0.0761125	0.0144518	-2.39689	0.862806	0.388244	1	no
Fsd2	chr7:88679239-88711867	CR_Ileum	GF_Ileum	0.0226107	0.00429382	-2.39667	0.865032	0.387021	1	no
-	chr17:88011031-88011602	CR_Ileum	GF_Ileum	0.326338	0.0620448	-2.39499	1.10314	0.269968	0.758382	no
3110021A11Rik	chr6:119798210-119799034	CR_Ileum	GF_Ileum	0.0982426	0.0187465	-2.38973	0.865459	0.386787	1	no
Cyp3a44	chr5:146585558-146617450	CR_Ileum	GF_Ileum	5.25531	1.0031	-2.38931	2.83871	0.00452967	0.0504098	no
-	chr15:63905210-63906185	CR_Ileum	GF_Ileum	0.158583	0.0303298	-2.38643	1.09387	0.274011	1	no
Gpr171	chr3:58810899-59148178	CR_Ileum	GF_Ileum	0.314617	0.0602261	-2.38514	1.60664	0.108132	0.468464	no
Nkpd1	chr7:20103148-20110399	CR_Ileum	GF_Ileum	0.0243775	0.00466654	-2.38513	0.368756	0.71231	1	no
Tek	chr4:94405990-94541630	CR_Ileum	GF_Ileum	0.151452	0.0290024	-2.38462	1.91639	0.0553159	1	no
Tnfrsf26	chr7:150793589-150813750	CR_Ileum	GF_Ileum	0.0447551	0.00858456	-2.38224	1.09203	0.274819	1	no
Txk	chr5:73087216-73144012	CR_Ileum	GF_Ileum	0.41091	0.0788256	-2.38209	1.7091	0.087433	0.412382	no
Runx2	chr17:44740949-45256237	CR_Ileum	GF_Ileum	0.194694	0.0373633	-2.38152	1.09582	0.273158	1	no
Rasgrp1	chr2:117105728-117168613	CR_Ileum	GF_Ileum	0.393632	0.0755558	-2.38123	2.48416	0.0129858	0.112053	no
Stk32c	chr7:146289536-146428872	CR_Ileum	GF_Ileum	0.869084	0.166872	-2.38076	1.28932	0.197288	0.652169	no
Hip1	chr5:135882387-136020992	CR_Ileum	GF_Ileum	0.126973	0.0244059	-2.37922	2.10169	0.03558	1	no
Ehd3	chr17:74154180-74181433	CR_Ileum	GF_Ileum	0.0948819	0.0182466	-2.3785	1.649	0.0991484	1	no
Cd48	chr1:173612185-173635388	CR_Ileum	GF_Ileum	0.780468	0.150234	-2.37712	1.82108	0.0685944	0.354274	no
-	chr9:51174455-51190552	CR_Ileum	GF_Ileum	0.212602	0.0409415	-2.37652	0.790317	0.429343	1	no
Apol7b	chr15:77252638-77277890	CR_Ileum	GF_Ileum	0.513391	0.0990733	-2.37349	2.09147	0.036486	0.234205	no
Iigp1	chr18:60535162-60552283	CR_Ileum	GF_Ileum	0.204681	0.0395645	-2.37109	1.25668	0.208869	1	no
-	chr16:44722134-44723448	CR_Ileum	GF_Ileum	0.109806	0.0212256	-2.37108	1.09847	0.272001	1	no
Cd200r2	chr16:44867209-44916042	CR_Ileum	GF_Ileum	0.830083	0.160553	-2.37021	1.62033	0.105162	0.460618	no
Zeb2	chr2:44839153-44969604	CR_Ileum	GF_Ileum	0.0277224	0.00536965	-2.36815	1.11238	0.265973	1	no
Cd27	chr6:125165598-125197488	CR_Ileum	GF_Ileum	0.477755	0.0927707	-2.36453	0.0299903	0.976075	0.999999	no
-	chr13:14046870-14155743	CR_Ileum	GF_Ileum	0.219499	0.0427056	-2.36172	0.11	0.912409	1	no
Slc16a2	chrX:100892752-101017327	CR_Ileum	GF_Ileum	0.247295	0.0481246	-2.36138	0.656022	0.51181	1	no
-	chr3:61184722-61185361	CR_Ileum	GF_Ileum	0.270754	0.0527594	-2.35948	1.08623	0.277379	0.767694	no
Cts8	chr13:61348107-61356709	CR_Ileum	GF_Ileum	0.0267215	0.00520707	-2.35946	0.852477	0.393949	1	no
Arntl2	chr6:146743257-146782015	CR_Ileum	GF_Ileum	0.252963	0.0493274	-2.35847	0.552744	0.580439	1	no
Irak1bp1	chr9:82723412-82741295	CR_Ileum	GF_Ileum	0.0374195	0.00729751	-2.35831	0.36019	0.718705	1	no
-	chr8:13682908-13683932	CR_Ileum	GF_Ileum	0.146202	0.0285592	-2.35593	1.09292	0.27443	1	no
-	chr3:144428146-144429233	CR_Ileum	GF_Ileum	0.135755	0.0265652	-2.35339	1.08254	0.279013	1	no
Scarna6	chr1:89652585-89689003	CR_Ileum	GF_Ileum	1.73391	0.33941	-2.35293	0.168975	0.865816	0.999999	no
-	chr2:58240769-58241601	CR_Ileum	GF_Ileum	0.232264	0.0455178	-2.35126	1.15079	0.249819	1	no
Atp2b2	chr6:113695661-113992074	CR_Ileum	GF_Ileum	0.369987	0.0726016	-2.3494	2.40027	0.0163828	0.132855	no
Cyp3a16	chr5:146197177-146230592	CR_Ileum	GF_Ileum	0.0758497	0.0149254	-2.34538	1.0741	0.282779	1	no
-	chr10:58735582-58736626	CR_Ileum	GF_Ileum	0.0708248	0.0139473	-2.34427	0.835238	0.403584	1	no
Arhgap30	chr1:173319090-173348873	CR_Ileum	GF_Ileum	0.702322	0.138478	-2.34247	0.0791152	0.936941	0.999999	no
Slc9a10	chr16:45535421-45607114	CR_Ileum	GF_Ileum	0.0166371	0.0032825	-2.34154	0.835047	0.403692	1	no
-	chrX:92192143-92194755	CR_Ileum	GF_Ileum	0.27678	0.0547188	-2.33863	1.93397	0.0531168	0.301	no
Ifit1	chr19:34691540-34724540	CR_Ileum	GF_Ileum	9.67211	1.91316	-2.33787	1.134	0.256796	0.740902	no
Rasal3	chr17:32527605-32541753	CR_Ileum	GF_Ileum	0.816431	0.161653	-2.33643	2.10449	0.0353354	0.229023	no
St8sia4	chr1:97484258-97564171	CR_Ileum	GF_Ileum	0.297151	0.0588526	-2.33602	1.04786	0.294701	0.788284	no
Ggta1	chr2:35255698-35316945	CR_Ileum	GF_Ileum	0.19388	0.0384012	-2.33595	1.53775	0.124109	1	no
Neil2	chr14:63801281-63812362	CR_Ileum	GF_Ileum	0.0699823	0.0138613	-2.33592	1.08007	0.280111	1	no
-	chr1:54619763-54621478	CR_Ileum	GF_Ileum	0.297346	0.0589147	-2.33544	1.57389	0.115513	0.485855	no
Glyatl3	chr17:41041689-41051299	CR_Ileum	GF_Ileum	0.353238	0.0700554	-2.33407	0.865823	0.386587	0.880033	no
Sucnr1	chr3:59885790-59891488	CR_Ileum	GF_Ileum	4.13868	0.820846	-2.33399	2.66579	0.0076808	0.0757579	no
Nwd1	chr8:75170609-75238645	CR_Ileum	GF_Ileum	0.00800025	0.00159015	-2.33088	0.836418	0.40292	1	no
Arap3	chr18:38132276-38158623	CR_Ileum	GF_Ileum	0.28617	0.0568895	-2.33064	1.85116	0.0641463	0.339688	no
Olfr1372-ps1	chr11:51968377-51971409	CR_Ileum	GF_Ileum	0.0388426	0.00772422	-2.33018	0.846132	0.397479	1	no
Sla	chr15:66502331-66682282	CR_Ileum	GF_Ileum	0.586446	0.116887	-2.32688	2.11602	0.0343433	0.224532	no
Gpr113	chr5:30519970-30532262	CR_Ileum	GF_Ileum	0.0205816	0.0041126	-2.32323	0.833417	0.40461	1	no
Nkg7	chr7:50692507-50693616	CR_Ileum	GF_Ileum	5.05168	1.01111	-2.32082	2.76163	0.0057514	0.0607189	no
Hist1h4c	chr13:23789228-23790318	CR_Ileum	GF_Ileum	1.0015	0.200706	-2.319	1.43146	0.152298	0.568887	no
Ear5	chr14:51781934-51782693	CR_Ileum	GF_Ileum	0.104014	0.0208681	-2.31741	0.813588	0.415881	1	no
Mnda	chr1:175826485-175843053	CR_Ileum	GF_Ileum	0.00677324	0.00135927	-2.31702	0.338829	0.734739	1	no
-	chrX:92073127-92097124	CR_Ileum	GF_Ileum	0.706445	0.141811	-2.31661	1.91871	0.0550215	0.308004	no
Ccl24	chr5:136045806-136061988	CR_Ileum	GF_Ileum	0.235517	0.0472862	-2.31634	1.12595	0.260187	1	no
-	chr5:93417185-93417489	CR_Ileum	GF_Ileum	0.48809	0.0983641	-2.31094	0.837883	0.402097	0.892386	no
-	chr12:114496921-114668015	CR_Ileum	GF_Ileum	0.268344	0.0541232	-2.30976	0.403366	0.686679	0.999999	no
Dnm3	chr1:163917432-164408165	CR_Ileum	GF_Ileum	0.0537956	0.0108701	-2.30712	0.906032	0.364919	1	no
Aldh1a2	chr9:71063595-71144050	CR_Ileum	GF_Ileum	0.0284604	0.00576409	-2.30379	0.817334	0.413738	1	no
Gbp5	chr3:142159897-142185308	CR_Ileum	GF_Ileum	0.0832991	0.0169028	-2.30104	1.28827	0.197651	1	no
-	chr18:6019458-6020409	CR_Ileum	GF_Ileum	0.0770703	0.0156398	-2.30095	0.824607	0.409595	1	no
Cd33	chr7:50782825-50788541	CR_Ileum	GF_Ileum	0.0769169	0.0156104	-2.3008	0.833413	0.404612	1	no
Cfh	chr1:141982431-142079988	CR_Ileum	GF_Ileum	0.0141183	0.00286711	-2.29989	0.798158	0.424779	1	no
Slco1c1	chr6:141472906-141518698	CR_Ileum	GF_Ileum	0.0196996	0.00400607	-2.29791	0.342079	0.732292	1	no
Cd3e	chr9:44806825-44817700	CR_Ileum	GF_Ileum	4.90091	0.997068	-2.29729	2.37932	0.0173448	0.138625	no
Psg26	chr7:19059930-19069498	CR_Ileum	GF_Ileum	0.0314277	0.00639793	-2.29636	0.824933	0.409409	1	no
Rcsd1	chr1:167579075-167639403	CR_Ileum	GF_Ileum	0.500986	0.102408	-2.29044	2.04002	0.041348	0.255123	no
-	chr5:31878546-31879456	CR_Ileum	GF_Ileum	0.0807843	0.0165239	-2.28952	0.825323	0.409188	1	no
Hist1h3c	chr13:23836012-23837390	CR_Ileum	GF_Ileum	0.19638	0.0401745	-2.2893	1.04852	0.294401	1	no
-	chr6:71468495-71469283	CR_Ileum	GF_Ileum	0.194155	0.0397302	-2.2889	1.0488	0.294271	1	no
-	chr4:141220234-141220985	CR_Ileum	GF_Ileum	0.103373	0.0211629	-2.28825	0.817863	0.413435	1	no
Rgs22	chr15:35937867-36070270	CR_Ileum	GF_Ileum	1.45726	0.298647	-2.28675	2.11209	0.034679	0.226055	no
Bdh2	chr3:134944184-134967389	CR_Ileum	GF_Ileum	0.352193	0.0722753	-2.28479	0.872379	0.383002	0.877057	no
Lcp2	chr11:33947200-33992280	CR_Ileum	GF_Ileum	0.530073	0.108842	-2.28395	2.34552	0.0190003	0.148168	no
-	chr4:138024578-138025901	CR_Ileum	GF_Ileum	0.204679	0.0421156	-2.28094	1.29045	0.196896	1	no
-	chr14:54742473-54765847	CR_Ileum	GF_Ileum	3.20411	0.660062	-2.27925	2.57227	0.0101034	0.0930621	no
Acoxl	chr2:127680363-127949628	CR_Ileum	GF_Ileum	0.0651675	0.013435	-2.27816	1.1648	0.2441	1	no
Cd4	chr6:124814710-124838227	CR_Ileum	GF_Ileum	0.139774	0.0288277	-2.27757	1.51262	0.130377	1	no
-	chr1:53805686-53805823	CR_Ileum	GF_Ileum	16.6833	3.44659	-2.27516	0.81139	0.417141	0.903472	no
Qrich2	chr11:116302638-116315661	CR_Ileum	GF_Ileum	0.0293306	0.00606142	-2.27468	0.813336	0.416025	1	no
Cox6a2	chr7:135317459-135349880	CR_Ileum	GF_Ileum	0.12204	0.0252689	-2.27192	0.403989	0.686221	1	no
Cd6	chr19:10863828-10904548	CR_Ileum	GF_Ileum	0.278337	0.057647	-2.27152	1.68936	0.09115	0.422927	no
Sox5	chr6:143776944-144158088	CR_Ileum	GF_Ileum	0.016765	0.00347745	-2.26935	0.482849	0.629203	1	no
-	chr12:78032148-78032560	CR_Ileum	GF_Ileum	0.575505	0.119763	-2.26464	1.10676	0.2684	0.756371	no
Prkch	chr12:74686027-74879171	CR_Ileum	GF_Ileum	1.07732	0.224609	-2.26195	2.67314	0.00751456	0.0745143	no
-	chr9:63792994-63793545	CR_Ileum	GF_Ileum	0.312971	0.0654311	-2.25798	1.02911	0.303426	0.798009	no
Lck	chr4:129225587-129250885	CR_Ileum	GF_Ileum	2.26912	0.475241	-2.2554	2.76748	0.0056492	0.0599366	no
Dnahc11	chr12:119082013-119437516	CR_Ileum	GF_Ileum	0.00435747	0.000913364	-2.25423	0.178337	0.858458	1	no
-	chr13:19431141-19444632	CR_Ileum	GF_Ileum	2.87298	0.602895	-2.25257	1.06949	0.284848	0.777136	no
Dmgdh	chr13:94444390-94522778	CR_Ileum	GF_Ileum	0.0408199	0.00857842	-2.25049	1.01948	0.307977	1	no
-	chr11:62732579-62733259	CR_Ileum	GF_Ileum	0.459941	0.096785	-2.24859	1.2606	0.207452	0.669104	no
Tat	chr8:112510032-112523704	CR_Ileum	GF_Ileum	3.07981	0.64824	-2.24824	2.35056	0.0187453	0.146761	no
Ahrr	chr13:74348565-74429757	CR_Ileum	GF_Ileum	0.0875297	0.01845	-2.24615	1.47457	0.140328	1	no
Gpr174	chrX:104451216-104492108	CR_Ileum	GF_Ileum	0.0296499	0.00625457	-2.24505	0.841381	0.400135	1	no
Gm9199	chr14:73425409-73426697	CR_Ileum	GF_Ileum	0.209905	0.0442842	-2.24487	1.32896	0.183862	1	no
Susd4	chr1:184694396-184825871	CR_Ileum	GF_Ileum	0.0306647	0.00647731	-2.24311	0.344602	0.730393	1	no
Rtbdn	chr8:87470889-87480502	CR_Ileum	GF_Ileum	0.0328467	0.0069548	-2.23967	0.804041	0.421373	1	no
Gbp1	chr3:142257810-142282140	CR_Ileum	GF_Ileum	0.0214741	0.00454799	-2.2393	0.801908	0.422606	1	no
Tmem178	chr17:81343971-81401156	CR_Ileum	GF_Ileum	0.0373702	0.00793037	-2.23643	0.797308	0.425272	1	no
Plek	chr11:16871208-16908747	CR_Ileum	GF_Ileum	1.80398	0.382987	-2.23581	2.521	0.0117022	0.103886	no
Apol11b	chr15:77348245-77485945	CR_Ileum	GF_Ileum	3.84514	0.817408	-2.23391	0.699802	0.484051	0.94514	no
Ifi203	chr1:175850533-175872623	CR_Ileum	GF_Ileum	0.471261	0.100593	-2.22799	2.06157	0.0392491	0.246089	no
Olfr1417	chr19:11902566-11903514	CR_Ileum	GF_Ileum	0.110688	0.0236809	-2.2247	0.939932	0.347252	1	no
2014-03-01	chr8:68141938-68995536	CR_Ileum	GF_Ileum	0.0447224	0.00956962	-2.22446	0.814362	0.415438	1	no
BC060267	chr6:115760746-115788430	CR_Ileum	GF_Ileum	0.0709647	0.015195	-2.22351	1.16196	0.24525	1	no
Ncf1	chr5:134696129-134705495	CR_Ileum	GF_Ileum	0.900949	0.193221	-2.2212	2.51932	0.0117581	0.104258	no
-	chr5:105001347-105003461	CR_Ileum	GF_Ileum	0.144815	0.0310611	-2.22103	1.34205	0.179579	1	no
-	chr10:43460715-43461704	CR_Ileum	GF_Ileum	0.449215	0.096526	-2.21842	1.52996	0.126028	0.511243	no
Col23a1	chr11:51103421-51397427	CR_Ileum	GF_Ileum	0.0203194	0.00437401	-2.21583	1.01102	0.312005	1	no
Vmn2r57	chr7:48655101-48704011	CR_Ileum	GF_Ileum	0.0230591	0.00497873	-2.21148	0.774012	0.438924	1	no
Hcls1	chr16:36935068-36963300	CR_Ileum	GF_Ileum	1.06549	0.230081	-2.21131	2.45024	0.0142762	0.120129	no
-	chr17:46003804-46004773	CR_Ileum	GF_Ileum	0.141342	0.0305618	-2.20939	1.00341	0.315665	1	no
Adam12	chr7:141074882-141416780	CR_Ileum	GF_Ileum	0.00737545	0.00160034	-2.20435	0.786569	0.431535	1	no
Gbp2	chr3:142283606-142300972	CR_Ileum	GF_Ileum	2.02121	0.439189	-2.20231	2.7214	0.00650068	0.0666884	no
2310069B03Rik	chr6:82827859-82831847	CR_Ileum	GF_Ileum	0.0334446	0.00728008	-2.19975	0.779676	0.435581	1	no
-	chr19:55142126-55201775	CR_Ileum	GF_Ileum	0.0646607	0.0140836	-2.19887	0.140413	0.888333	1	no
-	chr2:136903440-136904329	CR_Ileum	GF_Ileum	0.156144	0.034033	-2.19787	1.00003	0.317297	1	no
Vgf	chr5:137506164-137509221	CR_Ileum	GF_Ileum	0.162511	0.035425	-2.1977	1.46309	0.143442	1	no
Pik3cd	chr4:148960487-149075738	CR_Ileum	GF_Ileum	0.0657861	0.0143712	-2.1946	0.0138906	0.988917	1	no
Gprasp2	chrX:132373572-132379269	CR_Ileum	GF_Ileum	0.0305454	0.00667415	-2.1943	0.644388	0.519324	1	no
-	chr19:34680091-34680976	CR_Ileum	GF_Ileum	0.156418	0.0342274	-2.19219	0.99468	0.319892	1	no
Chst10	chr1:38920717-38955005	CR_Ileum	GF_Ileum	0.0635681	0.013916	-2.19156	1.28429	0.199039	1	no
Hic1	chr11:74978066-74983757	CR_Ileum	GF_Ileum	0.699551	0.153211	-2.19091	2.098	0.0359055	0.231592	no
Apol11a	chr15:77338700-77347749	CR_Ileum	GF_Ileum	0.346754	0.0759928	-2.18998	1.3853	0.16596	0.595278	no
Gimap3	chr6:48714462-48720869	CR_Ileum	GF_Ileum	3.43805	0.754612	-2.18778	2.74537	0.00604422	0.0631044	no
-	chr2:127095303-127095778	CR_Ileum	GF_Ileum	0.187542	0.0412697	-2.18406	0.785907	0.431922	1	no
Gdf1,Lass1	chr8:72839673-72877172	CR_Ileum	GF_Ileum	0.0643272	0.0141598	-2.18363	0.0831592	0.933725	1	no
Tnn	chr1:162015162-162083706	CR_Ileum	GF_Ileum	0.019332	0.00426202	-2.18138	1.00039	0.317124	1	no
Arl5c	chr11:97850893-97857487	CR_Ileum	GF_Ileum	0.0854859	0.0188491	-2.18119	1.06968	0.284763	1	no
D1Pas1	chr1:188791294-188794506	CR_Ileum	GF_Ileum	0.0179326	0.00395909	-2.17934	0.780149	0.435303	1	no
Cd3d	chr9:44789868-44795135	CR_Ileum	GF_Ileum	1.29028	0.285127	-2.17801	2.22518	0.026069	0.185493	no
-	chr2:14072208-14072610	CR_Ileum	GF_Ileum	0.248284	0.0550553	-2.17304	0.784758	0.432595	1	no
Stat4	chr1:52065087-52164028	CR_Ileum	GF_Ileum	0.355388	0.0788834	-2.1716	1.93415	0.0530953	0.300947	no
-	chr4:108097607-108099425	CR_Ileum	GF_Ileum	0.116114	0.0258729	-2.16603	1.21138	0.22575	1	no
St6galnac4,St6galnac6	chr2:32442601-32476324	CR_Ileum	GF_Ileum	3.03037	0.675356	-2.16577	2.34025	0.019271	0.149654	no
I830077J02Rik	chr3:105728808-105735582	CR_Ileum	GF_Ileum	0.0609437	0.0135991	-2.16397	0.774416	0.438685	1	no
Thy1	chr9:43851466-43856662	CR_Ileum	GF_Ileum	0.606645	0.135384	-2.1638	2.01981	0.0434026	0.263216	no
-	chr8:37136587-37210841	CR_Ileum	GF_Ileum	0.172044	0.0384034	-2.16347	0.162495	0.870916	1	no
B020004J07Rik	chr4:101507573-101516627	CR_Ileum	GF_Ileum	0.00358498	0.000800564	-2.16288	0.268619	0.788223	1	no
Ppp1r14c	chr10:6881565-6980391	CR_Ileum	GF_Ileum	1.45028	0.324055	-2.16202	2.56668	0.0102678	0.094244	no
5730403I07Rik	chr9:77214218-77247223	CR_Ileum	GF_Ileum	0.0580574	0.012983	-2.16086	0.992964	0.320728	1	no
-	chr16:4473190-4541810	CR_Ileum	GF_Ileum	0.132187	0.0297176	-2.15319	0.190041	0.849277	1	no
-	chr8:86816573-86825939	CR_Ileum	GF_Ileum	1.08766	0.245021	-2.15026	1.505	0.132325	0.525596	no
-	chr11:94401111-94463665	CR_Ileum	GF_Ileum	1.84394	0.415695	-2.14919	0.136582	0.891361	0.999999	no
Fam43a	chr16:30599808-30602883	CR_Ileum	GF_Ileum	0.972072	0.219406	-2.14746	2.46399	0.01374	0.116869	no
Wfdc2	chr2:164388215-164394006	CR_Ileum	GF_Ileum	1.3562	0.306176	-2.14714	1.90622	0.0566218	0.313683	no
-	chr7:91028170-91050042	CR_Ileum	GF_Ileum	0.142149	0.0321179	-2.14595	0.0727195	0.942029	1	no
Ctsw	chr19:5465186-5468498	CR_Ileum	GF_Ileum	3.62072	0.819346	-2.14373	2.01665	0.0437321	0.264557	no
-	chr13:109384225-109385784	CR_Ileum	GF_Ileum	0.17396	0.0393924	-2.14277	1.40959	0.15866	1	no
-	chr5:20629993-20632701	CR_Ileum	GF_Ileum	0.346706	0.0785721	-2.14163	1.8728	0.0610956	0.329175	no
Klrb1f	chr6:128995918-129007489	CR_Ileum	GF_Ileum	0.03857	0.00875248	-2.13971	0.321134	0.748109	1	no
Ncf4	chr15:78075240-78093010	CR_Ileum	GF_Ileum	0.280784	0.0637246	-2.13954	1.60438	0.10863	0.469741	no
BC051142	chr17:34535764-34599279	CR_Ileum	GF_Ileum	0.249936	0.0567592	-2.13863	0.203385	0.838834	1	no
Fhod3	chr18:24867945-25327393	CR_Ileum	GF_Ileum	0.0201458	0.00458834	-2.13443	0.369807	0.711527	1	no
C77370	chrX:101272774-101396499	CR_Ileum	GF_Ileum	0.0181131	0.0041342	-2.13135	0.663897	0.506756	1	no
Ctnnd2	chr15:30102347-30959098	CR_Ileum	GF_Ileum	0.00911196	0.00208034	-2.13095	0.752603	0.451688	1	no
Ipcef1	chr10:3308331-3557940	CR_Ileum	GF_Ileum	0.242153	0.0557017	-2.12013	1.69713	0.0896715	1	no
-	chr19:53038222-53039828	CR_Ileum	GF_Ileum	0.128989	0.029674	-2.11997	1.24646	0.212596	1	no
Adamts6	chr13:105077952-105284843	CR_Ileum	GF_Ileum	0.0224429	0.00516913	-2.11827	0.958043	0.338041	1	no
-	chr7:117446202-117448052	CR_Ileum	GF_Ileum	0.344862	0.0795492	-2.1161	1.76309	0.077886	0.383719	no
Gm12253	chr11:58246060-58255124	CR_Ileum	GF_Ileum	0.0441844	0.0102323	-2.11041	0.751985	0.45206	1	no
Tgm1	chr14:56318845-56332329	CR_Ileum	GF_Ileum	0.0201491	0.00466622	-2.11038	0.262327	0.79307	1	no
-	chr15:79574945-79590353	CR_Ileum	GF_Ileum	0.0489659	0.011357	-2.1082	0.304702	0.760593	1	no
Sh2d1a	chrX:39855784-39875252	CR_Ileum	GF_Ileum	0.0814598	0.0188943	-2.10814	0.738991	0.459913	1	no
Parvg	chr15:84155149-84173408	CR_Ileum	GF_Ileum	0.325935	0.0757105	-2.10602	1.58422	0.113144	0.479928	no
Hspa12b	chr2:130953147-130971719	CR_Ileum	GF_Ileum	0.0186956	0.00434519	-2.10521	0.751714	0.452223	1	no
Ly6g6e	chr17:35208121-35224525	CR_Ileum	GF_Ileum	0.24333	0.0565877	-2.10436	0.245657	0.805948	1	no
Apol7c	chr15:77348245-77485945	CR_Ileum	GF_Ileum	0.238926	0.0556265	-2.10272	0.668548	0.503784	1	no
Efemp1	chr11:28753204-28826743	CR_Ileum	GF_Ileum	0.0277958	0.00647395	-2.10215	0.745209	0.456145	1	no
Klhl3	chr13:58105000-58203789	CR_Ileum	GF_Ileum	0.104771	0.0244125	-2.10155	1.13275	0.257319	1	no
Ablim3	chr18:61959046-62071506	CR_Ileum	GF_Ileum	0.0969021	0.0225974	-2.10037	1.25484	0.209536	1	no
-	chr9:57474398-57501257	CR_Ileum	GF_Ileum	0.241619	0.0564603	-2.09743	0.133203	0.894033	1	no
-	chr2:129143202-129144527	CR_Ileum	GF_Ileum	0.0449687	0.0105104	-2.0971	0.745521	0.455957	1	no
Kcnj15	chr16:95479257-95521865	CR_Ileum	GF_Ileum	0.102314	0.0239386	-2.09559	1.27087	0.203774	1	no
Slc10a1	chr12:82054171-82069066	CR_Ileum	GF_Ileum	0.189371	0.0443303	-2.09485	1.0409	0.297922	1	no
Nr0b2	chr4:133109304-133112451	CR_Ileum	GF_Ileum	0.528604	0.123887	-2.09317	1.5965	0.110378	0.473946	no
Pcnxl2	chr8:128275407-128422193	CR_Ileum	GF_Ileum	0.00727659	0.00170556	-2.09302	0.749096	0.453799	1	no
Rnf183	chr4:62088575-62095760	CR_Ileum	GF_Ileum	0.0838453	0.0196589	-2.09254	0.958789	0.337665	1	no
Tmcc2	chr1:134252891-134287858	CR_Ileum	GF_Ileum	0.0157585	0.00371605	-2.08429	0.745296	0.456093	1	no
-	chr7:51492536-51493819	CR_Ileum	GF_Ileum	0.0462346	0.0109123	-2.08301	0.744	0.456876	1	no
Arhgap15	chr2:43604343-44243143	CR_Ileum	GF_Ileum	0.123486	0.0291696	-2.08181	1.19691	0.231343	1	no
Klra5	chr6:129849008-129863242	CR_Ileum	GF_Ileum	0.20968	0.0495604	-2.08093	1.17174	0.241301	1	no
Meg3,Mir1906-1,Mir770	chr12:110779187-110809939	CR_Ileum	GF_Ileum	0.0828945	0.019619	-2.07902	0.732039	0.464145	1	no
Cxcr7	chr1:92100577-92112863	CR_Ileum	GF_Ileum	0.463366	0.109773	-2.07763	1.81341	0.0697679	0.358268	no
Tgtp2	chr11:48798830-48805756	CR_Ileum	GF_Ileum	0.403909	0.0958057	-2.07584	1.7687	0.0769433	0.380743	no
-	chr17:3309890-3310190	CR_Ileum	GF_Ileum	0.426584	0.101529	-2.07094	0.744237	0.456733	0.930358	no
Gpr15	chr16:58717547-58718837	CR_Ileum	GF_Ileum	0.0455284	0.0108432	-2.06997	0.729962	0.465413	1	no
Adamtsl2	chr2:26934900-26964133	CR_Ileum	GF_Ileum	0.0632311	0.015064	-2.06953	1.22934	0.218946	1	no
Oxct2a	chr4:122986580-123020925	CR_Ileum	GF_Ileum	0.31511	0.0750941	-2.06908	0.551539	0.581264	0.989529	no
4930583H14Rik	chr3:51192334-51200469	CR_Ileum	GF_Ileum	0.0481099	0.0114655	-2.06903	0.333673	0.738626	1	no
-	chr10:94469348-94572949	CR_Ileum	GF_Ileum	0.144778	0.0345232	-2.06821	0.179684	0.857401	1	no
-	chr16:43827243-43829200	CR_Ileum	GF_Ileum	0.213125	0.0509164	-2.0655	1.50634	0.131979	1	no
-	chr18:12753022-12753768	CR_Ileum	GF_Ileum	0.2681	0.0640541	-2.06541	1.0658	0.286516	0.779264	no
Mcam	chr9:43942740-43950809	CR_Ileum	GF_Ileum	0.236436	0.0565043	-2.06502	1.75079	0.0799821	1	no
-	chr11:62733381-62735055	CR_Ileum	GF_Ileum	0.294192	0.0703174	-2.0648	1.06474	0.286993	0.77993	no
-	chr14:77218636-77219897	CR_Ileum	GF_Ileum	0.139611	0.0334061	-2.06322	1.06506	0.286848	1	no
Slc11a1	chr1:74421776-74432625	CR_Ileum	GF_Ileum	0.0705896	0.0169659	-2.05682	1.06509	0.286834	1	no
Crybb1	chr5:112684840-112698602	CR_Ileum	GF_Ileum	0.215962	0.0522362	-2.04766	1.05583	0.291048	1	no
Actn2	chr13:12361693-12432999	CR_Ileum	GF_Ileum	0.735227	0.177999	-2.04632	1.08426	0.27825	0.768717	no
-	chr4:106986118-106986754	CR_Ileum	GF_Ileum	0.10967	0.026555	-2.04611	0.72553	0.468127	1	no
-	chr8:124898944-124899516	CR_Ileum	GF_Ileum	0.304183	0.0738708	-2.04186	0.98942	0.322458	0.819565	no
Ptcra	chr17:46892611-46900661	CR_Ileum	GF_Ileum	0.186158	0.0452272	-2.04127	1.17766	0.23893	1	no
Cd180	chr13:103483637-103496711	CR_Ileum	GF_Ileum	0.136363	0.0332048	-2.03799	1.41137	0.158135	1	no
-	chr8:11874273-11896691	CR_Ileum	GF_Ileum	0.243488	0.059305	-2.03762	1.67998	0.0929605	1	no
1700034I23Rik	chr3:40698122-40742198	CR_Ileum	GF_Ileum	0.0486315	0.0118482	-2.03723	0.168962	0.865827	1	no
Pip5kl1	chr2:32431338-32439299	CR_Ileum	GF_Ileum	0.119977	0.0292989	-2.03384	1.16552	0.243808	1	no
-	chr2:167399533-167403495	CR_Ileum	GF_Ileum	0.0395738	0.0096644	-2.03379	0.926004	0.354444	1	no
Tmem121	chr12:114424113-114427733	CR_Ileum	GF_Ileum	0.451027	0.110154	-2.03369	1.61439	0.106443	0.46397	no
-	chr8:77441278-77442069	CR_Ileum	GF_Ileum	0.161796	0.0395336	-2.03302	0.919937	0.357605	1	no
Pik3cg	chr12:32858099-32893514	CR_Ileum	GF_Ileum	2.74443	0.671816	-2.03037	2.83925	0.00452193	0.0503438	no
Gm5483	chr16:36184297-36188196	CR_Ileum	GF_Ileum	1.49945	0.367275	-2.0295	1.47886	0.139178	0.540778	no
Snora23	chr7:117161699-117203547	CR_Ileum	GF_Ileum	2.1496	0.526774	-2.02881	0.0562366	0.955153	0.999999	no
-	chr5:149775748-149776843	CR_Ileum	GF_Ileum	0.107397	0.0263318	-2.02808	0.932047	0.351312	1	no
Trfr2	chr5:138011078-138028709	CR_Ileum	GF_Ileum	0.0178018	0.00437213	-2.02562	0.721764	0.47044	1	no
-	chr7:91342538-91343470	CR_Ileum	GF_Ileum	0.391543	0.0962247	-2.02469	1.29178	0.196433	0.650703	no
Ang3,Ang5	chr14:44534733-44540745	CR_Ileum	GF_Ileum	0.0962342	0.0236581	-2.02422	0.306001	0.759604	1	no
-	chr6:50923362-50947433	CR_Ileum	GF_Ileum	0.0692861	0.017065	-2.02153	0.418341	0.675698	1	no
-	chr2:34961063-34964921	CR_Ileum	GF_Ileum	0.111917	0.0275737	-2.02107	0.91939	0.357892	1	no
-	chr5:148091041-148092790	CR_Ileum	GF_Ileum	0.0310955	0.00766169	-2.02097	0.720109	0.471458	1	no
9630028B13Rik	chr1:187253235-187292650	CR_Ileum	GF_Ileum	0.342566	0.0846935	-2.01606	0.181816	0.855727	0.999999	no
Prkcq	chr2:11094008-11222853	CR_Ileum	GF_Ileum	0.173631	0.0430405	-2.01226	1.62999	0.103104	1	no
-	chr12:56561188-56566314	CR_Ileum	GF_Ileum	0.182292	0.0452136	-2.01142	1.12261	0.261601	1	no
Ranbp17	chr11:33111793-33413746	CR_Ileum	GF_Ileum	0.0100308	0.002488	-2.01138	0.708036	0.478923	1	no
-	chr4:122738752-122739722	CR_Ileum	GF_Ileum	0.122863	0.0305229	-2.00909	0.920451	0.357337	1	no
Klra2	chr6:131169252-131197380	CR_Ileum	GF_Ileum	0.0301063	0.00747978	-2.009	0.305884	0.759693	1	no
Il1r2	chr1:40133056-40182070	CR_Ileum	GF_Ileum	0.0416209	0.0103471	-2.00808	0.421104	0.673679	1	no
Myo1g	chr11:6406550-6420961	CR_Ileum	GF_Ileum	0.51717	0.128777	-2.00577	2.00788	0.0446557	0.268346	no
Selplg	chr5:114267806-114280510	CR_Ileum	GF_Ileum	1.54072	0.384363	-2.00307	2.61092	0.00902988	0.0855468	no
Nrgn	chr9:37335673-37360333	CR_Ileum	GF_Ileum	6.82415	1.70409	-2.00165	2.73598	0.00621954	0.0645133	no
Emb	chr13:118009379-118063222	CR_Ileum	GF_Ileum	0.395688	0.0988275	-2.00138	1.83889	0.0659315	0.345623	no
-	chr17:53112018-53115158	CR_Ileum	GF_Ileum	0.101652	0.0254823	-1.99607	0.711237	0.476938	1	no
Basp1	chr15:25293031-25343519	CR_Ileum	GF_Ileum	1.53098	0.384755	-1.99244	2.33137	0.0197336	0.152061	no
-	chr8:22366273-22367540	CR_Ileum	GF_Ileum	0.448266	0.112666	-1.99231	1.60056	0.109475	0.471822	no
-	chr4:101905101-101907751	CR_Ileum	GF_Ileum	0.516229	0.129839	-1.99129	2.04474	0.04088	0.253079	no
Nlrc5	chr8:96957026-97051327	CR_Ileum	GF_Ileum	1.21505	0.305949	-1.98966	2.70729	0.00678358	0.0688686	no
Rcan2	chr17:43938799-44176465	CR_Ileum	GF_Ileum	0.0338398	0.00854976	-1.98476	0.881304	0.378153	1	no
Kcnj16	chr11:110829346-110889281	CR_Ileum	GF_Ileum	0.700116	0.177079	-1.9832	2.25726	0.0239916	0.175035	no
-	chr17:5799424-5803409	CR_Ileum	GF_Ileum	0.504657	0.127972	-1.97948	0.545968	0.585088	0.991124	no
-	chr12:114010409-114017961	CR_Ileum	GF_Ileum	0.529047	0.134306	-1.97788	2.54164	0.0110334	0.0994307	no
Lilrb4	chr10:51210780-51216417	CR_Ileum	GF_Ileum	0.184297	0.0468504	-1.9759	1.27136	0.2036	1	no
2610019F03Rik	chr8:13952007-13974777	CR_Ileum	GF_Ileum	0.0413564	0.0105213	-1.9748	0.898087	0.369139	1	no
-	chr9:7723463-7723760	CR_Ileum	GF_Ileum	2.86032	0.728214	-1.97374	1.30844	0.190724	0.64099	no
-	chr14:102976336-102982501	CR_Ileum	GF_Ileum	0.219497	0.0559517	-1.97195	2.03072	0.0422839	1	no
Foxl1	chr8:123651584-123654544	CR_Ileum	GF_Ileum	0.0169409	0.00431857	-1.97188	0.692825	0.488419	1	no
Asb2	chr12:104559351-104594211	CR_Ileum	GF_Ileum	0.871405	0.222181	-1.97161	1.66094	0.0967261	0.438532	no
-	chr1:79597864-79599265	CR_Ileum	GF_Ileum	0.0772853	0.0197074	-1.97145	0.904429	0.365768	1	no
-	chr7:28016702-28017345	CR_Ileum	GF_Ileum	0.409886	0.104598	-1.97037	1.11502	0.264844	0.751949	no
Il21r	chr7:132746942-132777084	CR_Ileum	GF_Ileum	0.789775	0.202167	-1.96589	2.2124	0.0269387	0.189707	no
Kcnh7	chr2:62537371-63022344	CR_Ileum	GF_Ileum	0.0131357	0.00336277	-1.96577	0.23049	0.817711	1	no
Gp49a	chr10:51200484-51206025	CR_Ileum	GF_Ileum	0.16602	0.042571	-1.96341	1.05775	0.29017	1	no
-	chrX:92185805-92187264	CR_Ileum	GF_Ileum	0.201932	0.051847	-1.96154	1.31665	0.187957	1	no
-	chr17:5799424-5803409	CR_Ileum	GF_Ileum	4.38646	1.12809	-1.95917	2.10955	0.034897	0.226999	no
-	chr8:127474489-127475161	CR_Ileum	GF_Ileum	0.0956229	0.0245934	-1.95908	0.693438	0.488035	1	no
4833422C13Rik	chr13:91600701-91926971	CR_Ileum	GF_Ileum	0.0743306	0.0191259	-1.95843	0.176108	0.860209	1	no
-	chr5:51840309-51841186	CR_Ileum	GF_Ileum	0.134539	0.0346229	-1.95822	0.869592	0.384523	1	no
Sim2	chr16:94085504-94348638	CR_Ileum	GF_Ileum	0.0133474	0.00343884	-1.95657	0.691901	0.488999	1	no
Gpsm3	chr17:34726750-34728699	CR_Ileum	GF_Ileum	0.812718	0.209508	-1.95575	1.94883	0.0513154	0.294237	no
Mndal	chr1:175787350-175810318	CR_Ileum	GF_Ileum	1.07398	0.276862	-1.95573	1.51203	0.130527	0.521554	no
Cyth4	chr15:78427476-78452449	CR_Ileum	GF_Ileum	0.841673	0.217781	-1.95038	2.28679	0.0222079	0.165461	no
Srpk3	chrX:71019760-71024263	CR_Ileum	GF_Ileum	0.0259942	0.00673971	-1.94743	0.686553	0.492365	1	no
Hvcn1	chr5:122659745-122714469	CR_Ileum	GF_Ileum	1.0807	0.280415	-1.94633	1.01867	0.308359	0.804152	no
Gfi1b	chr2:28464969-28477502	CR_Ileum	GF_Ileum	0.830255	0.215543	-1.94558	1.66077	0.0967602	0.438589	no
Igf1	chr10:87321800-87399792	CR_Ileum	GF_Ileum	0.00677895	0.00176162	-1.94416	0.183284	0.854575	1	no
Upk3b	chr5:136514365-136520863	CR_Ileum	GF_Ileum	0.0248769	0.00647395	-1.94209	0.681075	0.495824	1	no
Crtam	chr9:40780880-40812669	CR_Ileum	GF_Ileum	0.135911	0.0354319	-1.93954	1.15123	0.249637	1	no
Cwh43	chr5:73797316-73844664	CR_Ileum	GF_Ileum	0.568951	0.148426	-1.93856	1.88406	0.0595575	0.323863	no
Apol7e	chr15:77529318-77549718	CR_Ileum	GF_Ileum	1.17489	0.306659	-1.93782	2.25502	0.0241318	0.175826	no
Tspan6	chrX:130425608-130432968	CR_Ileum	GF_Ileum	7.54031	1.97041	-1.93613	1.90216	0.0571508	0.315607	no
Serpina3f,Serpina3g	chr12:105452753-105480144	CR_Ileum	GF_Ileum	0.585596	0.15316	-1.93486	1.78767	0.0738294	0.371044	no
Akt3	chr1:178744942-179178999	CR_Ileum	GF_Ileum	0.345839	0.0904857	-1.93434	0.329001	0.742155	0.999999	no
Ahi1	chr10:20672352-20811827	CR_Ileum	GF_Ileum	0.00987302	0.00258401	-1.93388	0.371846	0.710007	1	no
Atp10d	chr5:72594567-72690010	CR_Ileum	GF_Ileum	0.0587832	0.0154107	-1.93148	1.06601	0.286419	1	no
Gm16998	chr10:53795727-53800887	CR_Ileum	GF_Ileum	0.174933	0.0458624	-1.93142	1.09382	0.274035	1	no
Fyb	chr15:6472798-6615605	CR_Ileum	GF_Ileum	5.98182	1.57134	-1.92859	2.76019	0.00577672	0.0609128	no
-	chr2:34958681-34959320	CR_Ileum	GF_Ileum	0.100393	0.0263797	-1.92816	0.684414	0.493714	1	no
-	chr4:115489928-115491241	CR_Ileum	GF_Ileum	0.0808107	0.0212444	-1.92746	0.876208	0.380917	1	no
Eomes	chr9:118387306-118395250	CR_Ileum	GF_Ileum	0.0261716	0.00690109	-1.92311	0.561062	0.574755	1	no
Myo5a	chr9:74919012-75071494	CR_Ileum	GF_Ileum	0.108778	0.028695	-1.92252	1.99503	0.0460394	1	no
Prickle2	chr6:92320885-92656178	CR_Ileum	GF_Ileum	0.124647	0.0329112	-1.9212	1.36497	0.172262	1	no
Tnfrsf8	chr4:144857079-144905050	CR_Ileum	GF_Ileum	0.0911067	0.0240587	-1.921	1.2561	0.209078	1	no
Ms4a6c	chr19:11543857-11556686	CR_Ileum	GF_Ileum	0.818994	0.216675	-1.91832	1.91587	0.0553814	0.309151	no
-	chr14:59108087-59108913	CR_Ileum	GF_Ileum	0.211803	0.0560642	-1.91757	0.949296	0.34247	1	no
-	chr15:101225920-101227599	CR_Ileum	GF_Ileum	0.248576	0.065825	-1.91698	0.682294	0.495053	1	no
Ugt2a3	chr5:87553971-87853228	CR_Ileum	GF_Ileum	3.85637	1.02206	-1.91576	0.485963	0.626994	0.999999	no
-	chr11:101519567-101520265	CR_Ileum	GF_Ileum	8.99874	2.38617	-1.91503	2.12099	0.0339227	0.222628	no
Klhl6	chr16:19946585-19983122	CR_Ileum	GF_Ileum	0.174636	0.0463206	-1.91462	1.45176	0.146569	1	no
Bglap2	chr3:88181657-88182621	CR_Ileum	GF_Ileum	0.0875998	0.0232392	-1.91437	0.561611	0.574381	1	no
Cd209a	chr8:3743394-3748984	CR_Ileum	GF_Ileum	0.0346671	0.00922428	-1.91006	0.67078	0.502361	1	no
-	chr7:80883080-80884587	CR_Ileum	GF_Ileum	0.0680982	0.0181277	-1.90942	0.866232	0.386363	1	no
Itgax	chr7:135272975-135294171	CR_Ileum	GF_Ileum	0.696082	0.185315	-1.90928	1.73603	0.0825584	0.397934	no
Il18rap	chr1:40572206-40606142	CR_Ileum	GF_Ileum	0.0391807	0.0104388	-1.90819	0.850444	0.395079	1	no
2010001M09Rik	chr18:35806918-35809021	CR_Ileum	GF_Ileum	0.124489	0.033231	-1.90542	0.860104	0.389732	1	no
-	chr2:29599576-29600633	CR_Ileum	GF_Ileum	0.102831	0.0274788	-1.90388	0.863421	0.387906	1	no
Cpne5	chr17:29293465-29374735	CR_Ileum	GF_Ileum	0.122697	0.0327936	-1.90361	1.5002	0.133562	1	no
-	chr3:8011011-8012592	CR_Ileum	GF_Ileum	0.128209	0.034334	-1.90079	1.06451	0.287097	1	no
Aire	chr10:77492775-77526360	CR_Ileum	GF_Ileum	0.0256169	0.00687107	-1.89849	0.396136	0.692005	1	no
Mtap1a	chr2:121115337-121181398	CR_Ileum	GF_Ileum	0.386129	0.103598	-1.89809	0.568536	0.569671	0.985251	no
Slc6a2	chr8:95484945-95525566	CR_Ileum	GF_Ileum	0.00758279	0.00203568	-1.89722	0.674234	0.500163	1	no
Rab39	chr9:53492214-53514337	CR_Ileum	GF_Ileum	0.0160208	0.00430152	-1.89703	0.670984	0.502231	1	no
Hmha1	chr10:79479416-79494216	CR_Ileum	GF_Ileum	1.79839	0.483253	-1.89586	2.29414	0.0217825	0.163129	no
Sec1	chr7:52933056-52934928	CR_Ileum	GF_Ileum	0.00298362	0.000802914	-1.89375	0.234989	0.814218	1	no
-	chr6:41113247-41113545	CR_Ileum	GF_Ileum	0.763953	0.206368	-1.88826	0.83086	0.406052	0.8953	no
Gzmc	chr14:56850237-56853493	CR_Ileum	GF_Ileum	0.0591797	0.0159946	-1.88751	0.665458	0.505758	1	no
Otogl	chr10:107199365-107349190	CR_Ileum	GF_Ileum	0.00651915	0.00176275	-1.88686	0.648366	0.516748	1	no
5031414D18Rik	chr14:75415833-75452339	CR_Ileum	GF_Ileum	0.0179687	0.00485963	-1.88656	0.661229	0.508465	1	no
-	chr8:27260074-27260973	CR_Ileum	GF_Ileum	0.0620015	0.0167783	-1.88571	0.6648	0.506178	1	no
-	chr14:100010965-100011934	CR_Ileum	GF_Ileum	0.056435	0.0152809	-1.88486	0.670102	0.502793	1	no
Snora74a	chr18:35713063-35751699	CR_Ileum	GF_Ileum	4.22896	1.14571	-1.88407	0.137323	0.890775	0.999999	no
Ccdc85a	chr11:28285691-28484296	CR_Ileum	GF_Ileum	0.0148564	0.00402591	-1.8837	0.39269	0.694548	1	no
-	chr9:54962409-54964442	CR_Ileum	GF_Ileum	0.0239288	0.00648446	-1.88369	0.669291	0.50331	1	no
-	chr9:54673045-54673214	CR_Ileum	GF_Ileum	14.7611	4.00871	-1.88059	1.36138	0.173394	0.609312	no
Tlr7	chrX:163742862-163768460	CR_Ileum	GF_Ileum	0.0247846	0.0067309	-1.88057	0.855444	0.392305	1	no
Cd300c	chr11:114817591-114821731	CR_Ileum	GF_Ileum	0.08724	0.0237174	-1.87904	0.669535	0.503155	1	no
Rgs1	chr1:146091798-146096234	CR_Ileum	GF_Ileum	1.08783	0.296011	-1.87774	1.57988	0.114135	0.482363	no
Atp1a2	chr1:174201839-174228195	CR_Ileum	GF_Ileum	0.0947945	0.0258125	-1.87673	1.48614	0.137243	1	no
Prkcdbp	chr7:112629129-112630711	CR_Ileum	GF_Ileum	0.052154	0.0142457	-1.87226	0.658578	0.510167	1	no
Iqsec3	chr6:121322950-121423696	CR_Ileum	GF_Ileum	0.00658879	0.00180466	-1.86829	0.659568	0.509531	1	no
Niacr1	chr5:124313578-124315525	CR_Ileum	GF_Ileum	0.024789	0.00680089	-1.8659	0.659975	0.50927	1	no
-	chr8:42472454-42473074	CR_Ileum	GF_Ileum	0.200342	0.055062	-1.86334	0.816593	0.414161	1	no
Cpn2	chr16:30256464-30267618	CR_Ileum	GF_Ileum	0.0224319	0.00617489	-1.86107	0.902811	0.366626	1	no
Emilin2	chr17:71601515-71660305	CR_Ileum	GF_Ileum	0.034979	0.00965188	-1.85761	0.951715	0.341242	1	no
-	chr8:71317838-71355405	CR_Ileum	GF_Ileum	0.233438	0.0644391	-1.85703	0.102706	0.918196	1	no
Zbp1	chr2:173031861-173044438	CR_Ileum	GF_Ileum	11.0055	3.04281	-1.85475	2.03015	0.0423415	0.258923	no
Usf1	chr1:173319090-173348873	CR_Ileum	GF_Ileum	1.14643	0.317055	-1.85435	0.201001	0.840698	0.999999	no
Mab21l3	chr3:101616998-101640146	CR_Ileum	GF_Ileum	0.0128445	0.00355301	-1.85403	0.6572	0.511052	1	no
Hecw2	chr1:53863717-54251878	CR_Ileum	GF_Ileum	0.0323561	0.00895072	-1.85396	1.27302	0.20301	1	no
Xcl1	chr1:166861778-166865641	CR_Ileum	GF_Ileum	1.29126	0.357225	-1.85388	1.50344	0.132725	0.526563	no
Enpp7	chr11:118849320-118867553	CR_Ileum	GF_Ileum	209.812	58.1239	-1.85189	1.72054	0.0853351	0.406413	no
-	chr12:86781931-86782782	CR_Ileum	GF_Ileum	0.0649204	0.0179869	-1.85172	0.65496	0.512494	1	no
-	chr9:76312675-76313330	CR_Ileum	GF_Ileum	0.222135	0.0616181	-1.85001	0.900663	0.367768	1	no
-	chr6:86527815-86531425	CR_Ileum	GF_Ileum	0.144383	0.0400699	-1.84931	0.763834	0.444966	1	no
-	chr17:81183098-81184596	CR_Ileum	GF_Ileum	0.252064	0.0699714	-1.84895	1.08745	0.276837	1	no
Stard6	chr18:70632198-70660717	CR_Ileum	GF_Ileum	0.0354565	0.00984562	-1.8485	0.653216	0.513617	1	no
Heyl	chr4:122910798-122927113	CR_Ileum	GF_Ileum	0.194034	0.0539334	-1.84706	1.7037	0.088438	1	no
-	chr15:100154012-100155284	CR_Ileum	GF_Ileum	0.0396262	0.0110227	-1.84597	0.647394	0.517377	1	no
Grin3a	chr4:49674493-49858621	CR_Ileum	GF_Ileum	0.0173581	0.0048359	-1.84375	0.787653	0.4309	1	no
-	chr6:35450758-35453700	CR_Ileum	GF_Ileum	0.188342	0.0525495	-1.8416	1.56095	0.118536	1	no
Apba3	chr10:80730916-80754283	CR_Ileum	GF_Ileum	67.9146	18.962	-1.84061	0.0347566	0.972274	0.999999	no
-	chr9:108889912-108934943	CR_Ileum	GF_Ileum	3.68339	1.02845	-1.84057	0.153045	0.878363	0.999999	no
Zcchc18	chrX:133515654-133573009	CR_Ileum	GF_Ileum	0.086583	0.0241859	-1.83991	0.684699	0.493534	1	no
2410004A20Rik	chr9:72949864-72952250	CR_Ileum	GF_Ileum	0.0862813	0.0241243	-1.83856	0.742504	0.457782	1	no
-	chr11:115724439-115725601	CR_Ileum	GF_Ileum	0.15328	0.0428627	-1.83838	1.08459	0.278102	1	no
-	chr15:89213550-89214408	CR_Ileum	GF_Ileum	0.0636374	0.0177999	-1.838	0.649507	0.516011	1	no
Adcy5	chr16:35155575-35311072	CR_Ileum	GF_Ileum	1.33068	0.372338	-1.83748	2.08425	0.0371374	0.236765	no
-	chr9:96945415-97011688	CR_Ileum	GF_Ileum	0.146699	0.0410923	-1.83592	0.0743164	0.940759	1	no
Pla2r1	chr2:60257095-60391318	CR_Ileum	GF_Ileum	0.0304026	0.00851962	-1.83533	1.08223	0.279148	1	no
-	chr5:108542082-108543073	CR_Ileum	GF_Ileum	0.105891	0.029728	-1.83269	0.837625	0.402241	1	no
Zkscan16	chr4:58956499-58971227	CR_Ileum	GF_Ileum	0.0163594	0.00459331	-1.83251	0.649155	0.516238	1	no
Lrrc4	chr6:28430347-28838832	CR_Ileum	GF_Ileum	0.0248233	0.00697371	-1.8317	0.0558346	0.955474	1	no
Igf2as	chr7:149836672-149856261	CR_Ileum	GF_Ileum	0.158726	0.0446977	-1.82827	0.776319	0.437561	1	no
-	chr2:71700659-71703355	CR_Ileum	GF_Ileum	0.289333	0.0815334	-1.82727	1.62719	0.103697	0.457496	no
-	chr18:65011705-65045869	CR_Ileum	GF_Ileum	0.326848	0.09212	-1.82704	0.885993	0.375621	0.870951	no
Fam40b	chr6:29867012-29909680	CR_Ileum	GF_Ileum	5.43028	1.53138	-1.8262	2.8406	0.00450294	0.0501727	no
Ptgs1	chr2:36085928-36107790	CR_Ileum	GF_Ileum	5.10685	1.44103	-1.82533	2.45842	0.0139551	0.118141	no
Cd34	chr1:196765014-196803153	CR_Ileum	GF_Ileum	0.391204	0.110416	-1.82497	0.825717	0.408965	0.897184	no
Lsp1	chr7:149646744-149701914	CR_Ileum	GF_Ileum	2.0628	0.582364	-1.82461	1.82683	0.0677252	0.351535	no
Atp6v0d2	chr4:19803984-19849713	CR_Ileum	GF_Ileum	0.0183103	0.00516986	-1.82446	0.645132	0.518842	1	no
Ncrna00086	chrX:53627762-53631647	CR_Ileum	GF_Ileum	0.193623	0.0546762	-1.82426	1.62273	0.104647	1	no
Adm	chr7:117771182-117773333	CR_Ileum	GF_Ileum	4.09075	1.15643	-1.82268	2.58813	0.00964988	0.0899248	no
-	chr12:78025489-78027836	CR_Ileum	GF_Ileum	0.353707	0.100181	-1.81995	1.68753	0.0915019	0.423923	no
Fasl	chr1:163710822-163718626	CR_Ileum	GF_Ileum	0.264411	0.0749049	-1.81965	1.24214	0.214183	0.679589	no
Tifab	chr13:56275063-56280246	CR_Ileum	GF_Ileum	0.0520108	0.0147541	-1.8177	0.840091	0.400857	1	no
Dgki	chr6:36787656-37250135	CR_Ileum	GF_Ileum	0.660323	0.187555	-1.81586	2.33143	0.0197307	0.152053	no
Stc2	chr11:31257849-31271373	CR_Ileum	GF_Ileum	0.129412	0.0367744	-1.8152	0.925298	0.354811	1	no
-	chr3:30959565-30978679	CR_Ileum	GF_Ileum	0.549195	0.156284	-1.81315	0.568652	0.569592	0.985251	no
Bzrap1	chr11:87574042-87599430	CR_Ileum	GF_Ileum	0.0322543	0.00917885	-1.81311	1.29686	0.194679	1	no
Arl4c	chr1:90594800-90598766	CR_Ileum	GF_Ileum	0.244172	0.0697017	-1.80863	1.75547	0.0791797	1	no
Lag3	chr6:124854376-124861723	CR_Ileum	GF_Ileum	1.18594	0.338917	-1.80702	2.03739	0.0416112	0.256163	no
Gprc5c	chr11:114712462-114733931	CR_Ileum	GF_Ileum	1.9274	0.550971	-1.80661	0.941426	0.346486	0.844872	no
-	chr11:62975768-62977906	CR_Ileum	GF_Ileum	0.0858481	0.0245436	-1.80644	1.01245	0.311321	1	no
-	chr6:86422809-86423892	CR_Ileum	GF_Ileum	0.0933146	0.0266835	-1.80615	0.825802	0.408916	1	no
-	chrX:154038757-154039956	CR_Ileum	GF_Ileum	0.123731	0.035448	-1.80343	0.92325	0.355877	1	no
Matk	chr10:80720129-80729671	CR_Ileum	GF_Ileum	10.7406	3.07937	-1.80237	1.6035	0.108825	0.470256	no
-	chr2:166921846-166922610	CR_Ileum	GF_Ileum	0.144164	0.041376	-1.80085	0.772	0.440114	1	no
-	chr13:45550319-45551148	CR_Ileum	GF_Ileum	0.0648105	0.0186011	-1.80084	0.633235	0.52658	1	no
-	chr4:154836776-154838078	CR_Ileum	GF_Ileum	0.392522	0.112713	-1.80012	1.00661	0.314121	0.810267	no
Pitpnc1	chr11:107069205-107332066	CR_Ileum	GF_Ileum	0.334104	0.0959523	-1.79991	1.56435	0.117736	0.491189	no
Zeb1	chr18:5491498-5774909	CR_Ileum	GF_Ileum	0.066287	0.0190498	-1.79895	1.2153	0.224251	1	no
Cd55	chr1:132320313-132359324	CR_Ileum	GF_Ileum	82.2054	23.625	-1.79892	1.67226	0.094473	0.432287	no
Alox5ap	chr5:150076530-150099699	CR_Ileum	GF_Ileum	17.2643	4.96195	-1.79881	2.15267	0.0313448	0.210843	no
Lmo1	chr7:116282085-116313822	CR_Ileum	GF_Ileum	0.0470421	0.0135224	-1.7986	0.631594	0.527652	1	no
-	chr15:100471529-100486721	CR_Ileum	GF_Ileum	1.17076	0.336606	-1.79831	1.22405	0.220933	0.68996	no
A4galt	chr15:83057151-83082204	CR_Ileum	GF_Ileum	0.682203	0.196189	-1.79796	1.5684	0.116787	0.488782	no
Sh2d7	chr9:54381897-54407976	CR_Ileum	GF_Ileum	9.21618	2.6553	-1.79529	2.41541	0.0157177	0.128876	no
Abcg3	chr5:105364075-105411736	CR_Ileum	GF_Ileum	0.0729853	0.0210321	-1.79502	1.08134	0.279544	1	no
Tnfrsf13c	chr15:82052173-82054766	CR_Ileum	GF_Ileum	0.103166	0.0298006	-1.79156	1.12368	0.261148	1	no
-	chr17:83976492-83977801	CR_Ileum	GF_Ileum	0.184471	0.0533	-1.79119	1.06957	0.284811	1	no
Gbp3	chr3:142223015-142236176	CR_Ileum	GF_Ileum	0.620159	0.179335	-1.78998	1.69189	0.0906675	0.421552	no
Hk3	chr13:55050713-55122746	CR_Ileum	GF_Ileum	0.0152976	0.00442377	-1.78996	0.159601	0.873195	1	no
Anxa8	chr14:34899175-34913754	CR_Ileum	GF_Ileum	0.0864042	0.0250499	-1.7863	1.04602	0.295553	1	no
BC018473	chr11:116603706-116636821	CR_Ileum	GF_Ileum	0.129827	0.0376565	-1.78562	0.823175	0.410409	1	no
Ces2f	chr8:107471255-107479862	CR_Ileum	GF_Ileum	0.203536	0.0590795	-1.78455	1.35144	0.176553	1	no
Cabp4	chr19:4135422-4139609	CR_Ileum	GF_Ileum	0.0661187	0.0192022	-1.78378	0.806175	0.420142	1	no
Adam19	chr11:45869488-45960844	CR_Ileum	GF_Ileum	0.356679	0.103661	-1.78275	1.44246	0.149173	0.562583	no
Flrt2	chr12:96930435-97023423	CR_Ileum	GF_Ileum	0.293364	0.0852745	-1.78251	2.03833	0.0415172	0.25578	no
Timd4	chr11:46624300-46657835	CR_Ileum	GF_Ileum	0.020713	0.00602183	-1.78226	0.624897	0.532038	1	no
-	chr3:95754652-95755089	CR_Ileum	GF_Ileum	0.162843	0.0474644	-1.77857	0.626141	0.531222	1	no
-	chr12:10404681-10406533	CR_Ileum	GF_Ileum	0.185056	0.0541033	-1.77417	1.28269	0.199602	1	no
Tnfrsf23	chr7:150851711-150871777	CR_Ileum	GF_Ileum	0.248017	0.0726765	-1.77088	1.37129	0.170286	1	no
-	chr10:94469348-94572949	CR_Ileum	GF_Ileum	0.714456	0.209605	-1.76917	0.70809	0.47889	0.943392	no
Gcet2	chr16:45610552-45622980	CR_Ileum	GF_Ileum	0.0309777	0.00911166	-1.76544	0.585354	0.55831	1	no
-	chr9:115753139-115757378	CR_Ileum	GF_Ileum	0.0384669	0.0113159	-1.76526	0.795376	0.426395	1	no
-	chr7:117429123-117431860	CR_Ileum	GF_Ileum	0.460026	0.13539	-1.76459	1.65472	0.0979811	0.442011	no
-	chr18:65011705-65045869	CR_Ileum	GF_Ileum	0.464762	0.136843	-1.76397	0.576446	0.564314	0.982926	no
Kcnd3	chr3:105251107-105476920	CR_Ileum	GF_Ileum	0.386612	0.113897	-1.76316	0.46998	0.638369	0.999999	no
-	chr17:25710928-25711915	CR_Ileum	GF_Ileum	0.202554	0.0597524	-1.76124	0.967577	0.333256	1	no
-	chr14:15511784-15513518	CR_Ileum	GF_Ileum	0.026213	0.00773586	-1.76065	0.621239	0.534443	1	no
Klrk1	chr6:129560338-129573859	CR_Ileum	GF_Ileum	0.0682803	0.0201548	-1.76035	0.885341	0.375973	1	no
2700023E23Rik,Snora26	chr5:74489093-74490362	CR_Ileum	GF_Ileum	15.351	4.53306	-1.75978	0.454339	0.649585	0.999999	no
-	chr19:53032109-53033635	CR_Ileum	GF_Ileum	0.227134	0.0671533	-1.75801	1.30596	0.191566	1	no
Dnase1l3	chr14:8797703-8826696	CR_Ileum	GF_Ileum	0.0739813	0.0218797	-1.75757	1.17491	0.240031	1	no
-	chr7:4412264-4432775	CR_Ileum	GF_Ileum	0.157526	0.0465893	-1.75752	0.198508	0.842647	1	no
Gjb4	chr4:127027030-127031325	CR_Ileum	GF_Ileum	1.01476	0.30013	-1.75748	1.34629	0.17821	0.618859	no
Xlr5a	chrX:70352973-70374599	CR_Ileum	GF_Ileum	0.0553075	0.0163586	-1.75742	0.677094	0.498346	1	no
Pamr1	chr2:102390177-102483197	CR_Ileum	GF_Ileum	0.0455195	0.0134702	-1.75671	0.89384	0.371408	1	no
-	chr11:112208172-112211664	CR_Ileum	GF_Ileum	0.0277136	0.0082017	-1.7566	0.618052	0.536541	1	no
-	chr2:71703553-71705488	CR_Ileum	GF_Ileum	0.39318	0.116408	-1.756	1.47061	0.141398	0.545387	no
Bmx	chrX:160630194-160696125	CR_Ileum	GF_Ileum	2.90384	0.860039	-1.75549	2.21244	0.026936	0.189694	no
Pecam1	chr11:106515531-106576595	CR_Ileum	GF_Ileum	0.205672	0.0609848	-1.75383	1.5185	0.128887	1	no
-	chr7:117442828-117444557	CR_Ileum	GF_Ileum	0.222766	0.0661447	-1.75183	1.31841	0.187365	1	no
Hck	chr2:152933320-152977177	CR_Ileum	GF_Ileum	26.7347	7.9454	-1.75052	2.76856	0.00563039	0.0597785	no
Magix	chrX:7250291-7258377	CR_Ileum	GF_Ileum	0.015608	0.00463899	-1.7504	0.260633	0.794376	1	no
Ntng2	chr2:29049700-29108513	CR_Ileum	GF_Ileum	0.279456	0.0830999	-1.7497	1.2684	0.204655	0.664638	no
Ltf	chr9:110921795-110945270	CR_Ileum	GF_Ileum	0.240189	0.0714281	-1.74961	1.53426	0.124966	1	no
Fga	chr3:82830074-82837539	CR_Ileum	GF_Ileum	0.0164169	0.00488337	-1.74923	0.291298	0.770824	1	no
-	chr7:138683568-138684201	CR_Ileum	GF_Ileum	0.395908	0.117795	-1.74889	1.06351	0.28755	0.78049	no
-	chr1:153087313-153094117	CR_Ileum	GF_Ileum	0.944509	0.281713	-1.74534	2.51117	0.0120332	0.106095	no
-	chr5:38581614-38582188	CR_Ileum	GF_Ileum	0.103131	0.0307834	-1.74426	0.607294	0.543656	1	no
-	chr2:71699131-71700481	CR_Ileum	GF_Ileum	0.172283	0.0514247	-1.74424	1.00737	0.313756	1	no
Tbx21	chr11:96959320-96976645	CR_Ileum	GF_Ileum	0.281726	0.0841009	-1.7441	1.54531	0.122272	0.502085	no
-	chr11:121583575-121584355	CR_Ileum	GF_Ileum	0.134768	0.040264	-1.74292	0.773332	0.439326	1	no
H2-DMa	chr17:34269872-34276307	CR_Ileum	GF_Ileum	32.7549	9.79197	-1.74204	2.33949	0.0193103	0.149863	no
Ak4	chr4:101091893-101140376	CR_Ileum	GF_Ileum	0.0755206	0.0225782	-1.74194	0.984493	0.324873	1	no
4930503L19Rik	chr18:70612024-70632138	CR_Ileum	GF_Ileum	0.352748	0.10547	-1.74181	1.44474	0.148532	0.561123	no
Cd226	chr18:89366818-89439719	CR_Ileum	GF_Ileum	0.259383	0.0775884	-1.74117	0.873737	0.382261	0.876485	no
-	chr13:75662964-75663824	CR_Ileum	GF_Ileum	0.237284	0.0709889	-1.74095	0.971553	0.331273	1	no
Pdx1	chr5:148040030-148087388	CR_Ileum	GF_Ileum	0.0363128	0.0108727	-1.73976	0.249974	0.802608	1	no
Sp110	chr1:87344098-87541670	CR_Ileum	GF_Ileum	1.42878	0.428326	-1.738	1.65542	0.0978386	0.441713	no
Gnai1	chr5:17770952-17866231	CR_Ileum	GF_Ileum	1.02252	0.306598	-1.73771	1.98059	0.0476372	0.280087	no
-	chr3:40824431-40825602	CR_Ileum	GF_Ileum	0.121459	0.0364543	-1.7363	0.898949	0.36868	1	no
1810011H11Rik	chr14:33599148-33631154	CR_Ileum	GF_Ileum	0.168697	0.0506599	-1.73552	1.15782	0.246939	1	no
Csf2rb	chr15:78156419-78181431	CR_Ileum	GF_Ileum	0.284788	0.0856492	-1.73338	1.88484	0.0594513	0.323525	no
-	chr10:118287085-118288286	CR_Ileum	GF_Ileum	0.254713	0.076622	-1.73304	1.24536	0.212998	1	no
Fxyd5	chr7:31817741-31827341	CR_Ileum	GF_Ileum	1.38244	0.416592	-1.73051	1.48339	0.13797	0.538192	no
C1s	chr6:124480361-124492377	CR_Ileum	GF_Ileum	0.0145668	0.00439729	-1.728	0.256865	0.797283	1	no
Gm6329	chr8:46245847-46250499	CR_Ileum	GF_Ileum	0.0586131	0.0176948	-1.7279	0.604335	0.545621	1	no
ENSMUSG00000068790	chr14:4126976-4144402	CR_Ileum	GF_Ileum	0.0829971	0.0250587	-1.72775	0.992339	0.321032	1	no
-	chr12:40753498-40755625	CR_Ileum	GF_Ileum	0.194813	0.0588244	-1.7276	1.36435	0.172459	1	no
-	chr11:62841032-62842535	CR_Ileum	GF_Ileum	0.210686	0.0636394	-1.7271	1.13516	0.256307	1	no
-	chr5:92168757-92170218	CR_Ileum	GF_Ileum	0.0621085	0.018781	-1.72552	0.783016	0.433617	1	no
Kirrel3	chr9:34296315-34847462	CR_Ileum	GF_Ileum	0.452985	0.137019	-1.72508	1.22494	0.220596	0.689415	no
Def6	chr17:28344722-28365553	CR_Ileum	GF_Ileum	0.838307	0.25358	-1.72504	1.32124	0.186421	0.633672	no
Gm10825	chr10:22122618-22127276	CR_Ileum	GF_Ileum	0.0181589	0.00549458	-1.72459	0.784846	0.432544	1	no
AI854703	chr6:48576434-48583737	CR_Ileum	GF_Ileum	0.0259327	0.00784898	-1.7242	0.46486	0.642032	1	no
4930519G04Rik	chr5:115303722-115333888	CR_Ileum	GF_Ileum	0.021724	0.00658117	-1.72288	0.612202	0.540404	1	no
Fam55c	chr16:55840065-55895398	CR_Ileum	GF_Ileum	0.253837	0.076926	-1.72236	1.52222	0.127954	1	no
-	chr16:30060286-30060952	CR_Ileum	GF_Ileum	0.0820907	0.0249	-1.72107	0.604063	0.545802	1	no
Vpreb3	chr10:75411056-75412391	CR_Ileum	GF_Ileum	0.0946682	0.0287183	-1.72091	0.588922	0.555913	1	no
Icam1	chr9:20820403-20833240	CR_Ileum	GF_Ileum	0.339802	0.103127	-1.72027	1.66087	0.096739	0.438572	no
Il33	chr19:29999603-30035205	CR_Ileum	GF_Ileum	1.65266	0.501626	-1.7201	2.14616	0.0318603	0.213322	no
Slc43a3	chr2:84776812-84798666	CR_Ileum	GF_Ileum	0.127011	0.0386055	-1.71808	1.24264	0.214001	1	no
-	chr3:98046085-98047735	CR_Ileum	GF_Ileum	0.230363	0.0700336	-1.71779	1.14444	0.25244	1	no
Gpr68	chr12:102114548-102146408	CR_Ileum	GF_Ileum	0.440378	0.134027	-1.71622	1.31575	0.188256	0.636774	no
Srsf12	chr4:33295965-33320315	CR_Ileum	GF_Ileum	0.0285803	0.008703	-1.71544	0.78051	0.435091	1	no
-	chr11:58164904-58165493	CR_Ileum	GF_Ileum	0.0973046	0.0296416	-1.71489	0.601891	0.547246	1	no
Cdh23	chr10:59766021-60159238	CR_Ileum	GF_Ileum	0.0195664	0.0059658	-1.71359	0.630802	0.52817	1	no
-	chr5:66114610-66115478	CR_Ileum	GF_Ileum	0.0575106	0.0175395	-1.71322	0.603411	0.546236	1	no
Mak	chr13:41120488-41175075	CR_Ileum	GF_Ileum	0.0490708	0.014978	-1.71202	0.729475	0.465711	1	no
-	chr16:87776187-87778089	CR_Ileum	GF_Ileum	0.252386	0.0771598	-1.70971	1.40321	0.160553	1	no
Stab1	chr14:31944537-31981827	CR_Ileum	GF_Ileum	1.00031	0.305991	-1.70889	2.20357	0.0275549	0.192684	no
-	chr10:94469348-94572949	CR_Ileum	GF_Ileum	0.32686	0.100037	-1.70813	0.530462	0.595791	0.994642	no
Dnajc6	chr4:101169252-101315404	CR_Ileum	GF_Ileum	0.0598854	0.0183285	-1.70812	1.16289	0.244875	1	no
Sema6c	chr3:94964371-94977862	CR_Ileum	GF_Ileum	0.559159	0.171376	-1.70609	0.983025	0.325595	0.822918	no
-	chr14:67793392-67828093	CR_Ileum	GF_Ileum	0.409533	0.125528	-1.70597	0.799793	0.423831	0.908254	no
Il25	chr14:55551531-55554673	CR_Ileum	GF_Ileum	0.725105	0.222563	-1.70398	1.43142	0.152311	0.568888	no
Ccdc129	chr6:55786898-55928639	CR_Ileum	GF_Ileum	1.2126	0.372292	-1.7036	1.80119	0.0716733	0.36433	no
2014-09-01	chr7:134357955-134361959	CR_Ileum	GF_Ileum	1.83037	0.562096	-1.70325	0.431459	0.666134	0.999999	no
2010109I03Rik	chr15:74708765-74712134	CR_Ileum	GF_Ileum	161.532	49.7237	-1.69982	2.63908	0.00831313	0.0803465	no
-	chr13:100981572-101222880	CR_Ileum	GF_Ileum	0.64742	0.200048	-1.69436	0.0485771	0.961256	0.999999	no
Pzp	chr6:128388774-128476738	CR_Ileum	GF_Ileum	0.017252	0.00533123	-1.69423	0.217971	0.827452	1	no
-	chr12:103953299-103954090	CR_Ileum	GF_Ileum	0.220643	0.0681848	-1.69419	0.982981	0.325617	1	no
Dmkn	chr7:31548774-31566085	CR_Ileum	GF_Ileum	0.244135	0.0754841	-1.69344	0.682887	0.494678	1	no
Gbp4	chr5:105505518-105722773	CR_Ileum	GF_Ileum	0.387085	0.119778	-1.69228	0.535725	0.592149	0.993578	no
Ltb	chr17:35331451-35333250	CR_Ileum	GF_Ileum	0.774143	0.240396	-1.68719	1.63805	0.101411	0.451669	no
-	chr1:187435381-187468887	CR_Ileum	GF_Ileum	0.229238	0.0711998	-1.6869	0.625482	0.531655	1	no
Cx3cr1	chr9:119957810-119977400	CR_Ileum	GF_Ileum	0.0811653	0.0252119	-1.68676	1.11719	0.263914	1	no
-	chr11:75396947-75397555	CR_Ileum	GF_Ileum	0.309436	0.0962256	-1.68515	0.965058	0.334516	0.832396	no
-	chr13:3298120-3298303	CR_Ileum	GF_Ileum	12.165	3.78501	-1.68437	1.13172	0.25775	0.742117	no
Coro1a	chr7:133840654-133848284	CR_Ileum	GF_Ileum	4.44531	1.38321	-1.68426	2.21554	0.0267232	0.188656	no
Adh7	chr3:137880736-137895006	CR_Ileum	GF_Ileum	0.0406387	0.012654	-1.68326	0.747693	0.454646	1	no
Slpi	chr2:164179805-164182243	CR_Ileum	GF_Ileum	0.111317	0.034673	-1.68278	0.74938	0.453628	1	no
Pgr	chr9:8899832-8968611	CR_Ileum	GF_Ileum	0.0454528	0.0141667	-1.68186	1.23537	0.216691	1	no
Tnf	chr17:35336335-35338941	CR_Ileum	GF_Ileum	0.481546	0.150442	-1.67846	1.48827	0.136679	0.535293	no
Mfng	chr15:78586312-78603875	CR_Ileum	GF_Ileum	0.331458	0.103578	-1.67811	1.50878	0.131355	0.523334	no
-	chr16:98265172-98265564	CR_Ileum	GF_Ileum	0.184528	0.0576837	-1.67761	0.580873	0.561326	1	no
Rpph1	chr14:51427121-51427446	CR_Ileum	GF_Ileum	26.7523	8.36922	-1.6765	2.08691	0.0368966	0.2359	no
Nckap1l	chr15:103284255-103333225	CR_Ileum	GF_Ileum	0.454998	0.142367	-1.67625	1.37069	0.170471	0.603934	no
Klhl4	chrX:111588128-111674307	CR_Ileum	GF_Ileum	0.0248367	0.00777941	-1.67474	0.74952	0.453544	1	no
Hmx2	chr7:138697575-138700096	CR_Ileum	GF_Ileum	1.31057	0.410536	-1.67461	1.78938	0.0735544	0.370106	no
-	chr8:19688361-19689175	CR_Ileum	GF_Ileum	0.756913	0.23712	-1.67451	1.39932	0.161718	0.586734	no
Ccdc136	chr6:29348925-29376995	CR_Ileum	GF_Ileum	0.0503928	0.0158215	-1.67133	0.87813	0.379873	1	no
Gpr126	chr10:14122390-14265193	CR_Ileum	GF_Ileum	0.605497	0.190349	-1.66947	1.86841	0.0617054	0.331327	no
Rmrp	chr4:43505656-43505931	CR_Ileum	GF_Ileum	38.6479	12.1518	-1.66922	1.86297	0.0624667	0.333745	no
-	chr16:11188356-11188734	CR_Ileum	GF_Ileum	0.393009	0.123611	-1.66876	0.742062	0.45805	0.931212	no
-	chr11:66768306-66769185	CR_Ileum	GF_Ileum	0.325434	0.102366	-1.66863	1.1217	0.26199	0.74785	no
-	chr11:109598377-109600163	CR_Ileum	GF_Ileum	0.0838404	0.026383	-1.66804	0.975542	0.329292	1	no
-	chr6:116149458-116152536	CR_Ileum	GF_Ileum	0.119929	0.0378482	-1.66388	0.749583	0.453506	1	no
Cd300lf	chr11:114952744-115023554	CR_Ileum	GF_Ileum	4.41845	1.39483	-1.66345	1.3935	0.163469	0.590388	no
-	chr7:50627819-50631724	CR_Ileum	GF_Ileum	0.572482	0.180849	-1.66245	1.03274	0.301725	0.795962	no
Cyp3a41b	chr5:146319532-146345599	CR_Ileum	GF_Ileum	0.020675	0.00653139	-1.66242	0.590223	0.555041	1	no
Pilrb1	chr5:138293374-138299277	CR_Ileum	GF_Ileum	0.0454068	0.014348	-1.66206	0.582875	0.559978	1	no
-	chr10:94846058-94879491	CR_Ileum	GF_Ileum	0.230376	0.0727985	-1.66201	0.142813	0.886438	1	no
Nr4a3	chr4:48064119-48096224	CR_Ileum	GF_Ileum	0.06688	0.0211591	-1.6603	0.848801	0.395992	1	no
-	chr2:172887327-172888694	CR_Ileum	GF_Ileum	0.144303	0.0456991	-1.65887	1.02345	0.306096	1	no
Pygl	chr12:71291801-71328670	CR_Ileum	GF_Ileum	4.07442	1.2911	-1.65799	2.54841	0.0108215	0.0980102	no
-	chr6:78400515-78401868	CR_Ileum	GF_Ileum	0.145872	0.0462388	-1.65753	1.05453	0.291641	1	no
-	chr9:96945415-97011688	CR_Ileum	GF_Ileum	0.183429	0.0582252	-1.65551	0.0998931	0.920429	1	no
Slfn1	chr11:82930346-82936161	CR_Ileum	GF_Ileum	0.109671	0.034833	-1.65465	1.05861	0.289779	1	no
Inpp5d	chr1:89504321-89617083	CR_Ileum	GF_Ileum	3.14233	0.999178	-1.65302	1.95986	0.0500126	0.289404	no
4933427E11Rik	chr15:74532841-74540804	CR_Ileum	GF_Ileum	0.0365635	0.0116263	-1.65301	0.198746	0.842462	1	no
Gjb5	chr4:127032052-127035408	CR_Ileum	GF_Ileum	0.148816	0.0473317	-1.65266	1.03042	0.302813	1	no
Ucma	chr2:4897167-4906794	CR_Ileum	GF_Ileum	0.0626201	0.0199638	-1.64924	0.249003	0.803359	1	no
Csf2rb2	chr15:78112939-78136218	CR_Ileum	GF_Ileum	0.284564	0.0907953	-1.64806	1.35631	0.175002	0.612419	no
Gm13939	chr2:109742552-109753476	CR_Ileum	GF_Ileum	0.0644995	0.0205876	-1.64751	0.738524	0.460196	1	no
Avil	chr10:126437764-126458050	CR_Ileum	GF_Ileum	11.0684	3.53648	-1.64607	2.54718	0.0108598	0.0982451	no
Acacb	chr5:114593473-114700767	CR_Ileum	GF_Ileum	1.27148	0.406263	-1.64603	2.04357	0.0409963	0.253581	no
Lphn3	chr5:81450617-82224755	CR_Ileum	GF_Ileum	0.0313165	0.0100075	-1.64585	1.05748	0.290291	1	no
-	chr16:3861472-3884568	CR_Ileum	GF_Ileum	0.204383	0.0653344	-1.64536	0.208207	0.835067	1	no
Fabp1	chr6:71149881-71155017	CR_Ileum	GF_Ileum	69.392	22.2169	-1.64312	2.82321	0.0047546	0.0524298	no
Fam171a2	chr11:102298295-102308977	CR_Ileum	GF_Ileum	0.0589576	0.0189054	-1.64088	1.10958	0.267179	1	no
Ano1	chr7:151774374-151937924	CR_Ileum	GF_Ileum	1.56231	0.50119	-1.64025	1.68973	0.0910804	0.422729	no
Aldh4a1	chr4:139178808-139205606	CR_Ileum	GF_Ileum	15.4739	4.96472	-1.64005	2.78666	0.0053254	0.0573117	no
Syt16	chr12:75098747-75368903	CR_Ileum	GF_Ileum	0.0296278	0.00951102	-1.63928	0.738825	0.460013	1	no
Fcer1g	chr1:173159702-173164480	CR_Ileum	GF_Ileum	3.19274	1.02542	-1.63858	1.80917	0.0704252	0.360361	no
-	chr5:34512579-34515578	CR_Ileum	GF_Ileum	0.173379	0.0557486	-1.63692	1.40133	0.161117	1	no
C8b	chr4:104438921-104477153	CR_Ileum	GF_Ileum	0.0362648	0.0116685	-1.63596	0.735084	0.462288	1	no
-	chr18:46658309-46659452	CR_Ileum	GF_Ileum	0.233008	0.0750388	-1.63467	1.03867	0.29896	1	no
-	chr1:184185557-184193295	CR_Ileum	GF_Ileum	0.368645	0.118765	-1.63413	0.733892	0.463015	0.934258	no
Otoa	chr7:128226951-128306603	CR_Ileum	GF_Ileum	0.0107245	0.00345968	-1.6322	0.572548	0.566951	1	no
Tmeff1	chr4:48597830-48676003	CR_Ileum	GF_Ileum	0.70398	0.227146	-1.63191	1.57493	0.115274	0.485263	no
Gkn3	chr6:87333312-87338929	CR_Ileum	GF_Ileum	0.183096	0.0591054	-1.63124	0.841705	0.399953	1	no
Tbc1d10c	chr19:4184356-4191156	CR_Ileum	GF_Ileum	1.83687	0.593175	-1.63072	0.718112	0.472688	0.93973	no
-	chr5:102192124-102192954	CR_Ileum	GF_Ileum	0.198769	0.064198	-1.6305	0.956105	0.339019	1	no
Slc46a1	chr11:78279196-78285447	CR_Ileum	GF_Ileum	11.3437	3.66488	-1.63005	2.48867	0.0128222	0.110998	no
Ms4a1	chr19:11325092-11340641	CR_Ileum	GF_Ileum	0.0990619	0.0320067	-1.62996	0.960095	0.337007	1	no
Gpm6b	chrX:162676874-162826965	CR_Ileum	GF_Ileum	0.0258272	0.00834575	-1.62978	0.591619	0.554105	1	no
Il9r	chr11:32087584-32100279	CR_Ileum	GF_Ileum	0.285812	0.0924381	-1.6285	1.26318	0.206525	0.667641	no
Morc1	chr16:48431349-48631018	CR_Ileum	GF_Ileum	0.0258637	0.00836585	-1.62834	0.732733	0.463721	1	no
Arhgap4	chrX:71137440-71156679	CR_Ileum	GF_Ileum	3.35523	1.08648	-1.62676	1.97406	0.0483744	0.283096	no
-	chr10:66375252-66376668	CR_Ileum	GF_Ileum	0.271127	0.0878103	-1.62651	1.26558	0.205665	0.666297	no
-	chr8:122168370-122169267	CR_Ileum	GF_Ileum	0.12807	0.0415325	-1.62462	0.775728	0.43791	1	no
F2rl2	chr13:96397131-96661897	CR_Ileum	GF_Ileum	0.052636	0.0170731	-1.62432	0.0191461	0.984725	1	no
Gm12166	chr11:45864921-45865112	CR_Ileum	GF_Ileum	0.409921	0.132985	-1.62409	0.302543	0.762238	0.999999	no
Fam151a	chr4:106406194-106477902	CR_Ileum	GF_Ileum	67.335	21.8447	-1.62407	1.94923	0.0512685	0.294136	no
-	chr7:123690508-123691371	CR_Ileum	GF_Ileum	0.1885	0.0611714	-1.62364	0.929338	0.352714	1	no
Hpgds	chr6:65067286-65094724	CR_Ileum	GF_Ileum	1.68212	0.546446	-1.62213	2.24249	0.0249295	0.179735	no
Klf17	chr4:117429263-117438271	CR_Ileum	GF_Ileum	0.0493497	0.0160662	-1.61902	1.02998	0.303021	1	no
Mrap2	chr9:87039140-87078880	CR_Ileum	GF_Ileum	0.063238	0.0205895	-1.61888	0.585697	0.558079	1	no
Sema5b	chr16:35541447-35664344	CR_Ileum	GF_Ileum	0.0746014	0.0242947	-1.61856	0.682088	0.495183	1	no
Sema3e	chr5:14025275-14256689	CR_Ileum	GF_Ileum	0.016573	0.00540037	-1.61771	0.820027	0.412201	1	no
-	chr15:77740674-77741875	CR_Ileum	GF_Ileum	0.0361793	0.0117928	-1.61726	0.563375	0.573179	1	no
Duox1	chr2:122141407-122173708	CR_Ileum	GF_Ileum	0.278759	0.0909054	-1.61658	1.65678	0.0975644	0.441036	no
Cacna1e	chr1:156237886-156573050	CR_Ileum	GF_Ileum	0.00876164	0.00285766	-1.61637	0.635678	0.524987	1	no
-	chr6:28160909-28213778	CR_Ileum	GF_Ileum	0.168003	0.0548271	-1.61552	0.167103	0.867289	1	no
Clec7a	chr6:129411608-129422795	CR_Ileum	GF_Ileum	0.0701216	0.0229131	-1.61369	0.905234	0.365341	1	no
-	chr7:72516599-72519139	CR_Ileum	GF_Ileum	0.232685	0.0760567	-1.61323	0.906027	0.364922	1	no
C1rb	chr6:124520447-124531062	CR_Ileum	GF_Ileum	0.0352529	0.0115234	-1.61318	0.787671	0.430889	1	no
-	chr19:42162117-42163303	CR_Ileum	GF_Ileum	0.182974	0.0598471	-1.61229	0.953704	0.340234	1	no
-	chr6:59281755-59289888	CR_Ileum	GF_Ileum	0.319238	0.104426	-1.61215	1.88227	0.0598	0.324667	no
-	chr14:102955280-102974088	CR_Ileum	GF_Ileum	1.95624	0.640029	-1.61188	0.908344	0.363696	0.860466	no
Plvap	chr8:74021651-74035668	CR_Ileum	GF_Ileum	0.209856	0.0686642	-1.61177	1.25192	0.2106	1	no
Snora64	chr17:24857007-24858872	CR_Ileum	GF_Ileum	44.7245	14.6348	-1.61166	0.0150708	0.987976	0.999999	no
-	chr1:172221624-172222553	CR_Ileum	GF_Ileum	0.196829	0.0644083	-1.61162	0.903076	0.366486	1	no
-	chr2:57230434-57231395	CR_Ileum	GF_Ileum	0.327621	0.107318	-1.61013	1.14874	0.250665	0.732982	no
2010005H15Rik	chr16:36221488-36257521	CR_Ileum	GF_Ileum	19.655	6.4399	-1.60979	0.797995	0.424873	0.909043	no
-	chr16:9568048-9570208	CR_Ileum	GF_Ileum	0.203617	0.0667432	-1.60916	1.20043	0.229971	1	no
Ifit2	chr19:34625183-34651024	CR_Ileum	GF_Ileum	0.810363	0.265778	-1.60834	1.64436	0.100101	0.448046	no
Agap2	chr10:126512437-126530328	CR_Ileum	GF_Ileum	0.321503	0.10546	-1.60814	1.41353	0.1575	0.579097	no
Fat4	chr3:38785861-38910905	CR_Ileum	GF_Ileum	0.00458337	0.0015055	-1.60617	0.724905	0.468511	1	no
Hexim1	chr11:102977130-102994427	CR_Ileum	GF_Ileum	8.45975	2.77887	-1.60611	0.728052	0.466582	0.936724	no
Ccbp2	chr9:121807581-121820182	CR_Ileum	GF_Ileum	0.0353197	0.0116089	-1.60524	0.782587	0.43387	1	no
Cdkl5	chrX:157205944-157432613	CR_Ileum	GF_Ileum	0.185873	0.061109	-1.60486	1.3975	0.162264	1	no
-	chr11:118849320-118867553	CR_Ileum	GF_Ileum	45.4885	14.972	-1.60323	0.788394	0.430466	0.912909	no
Herc6	chr6:57530950-57615493	CR_Ileum	GF_Ileum	3.37511	1.11145	-1.6025	1.77983	0.0751034	0.375042	no
-	chr1:163160524-163161893	CR_Ileum	GF_Ileum	0.030724	0.01012	-1.60216	0.559269	0.575978	1	no
Elavl4	chr4:109876341-110024516	CR_Ileum	GF_Ileum	0.0203024	0.00669843	-1.59976	0.459484	0.645887	1	no
Lrmp	chr6:145070258-145159490	CR_Ileum	GF_Ileum	12.0835	3.9914	-1.59808	2.55163	0.0107219	0.0973341	no
Mpeg1	chr19:12535268-12539775	CR_Ileum	GF_Ileum	0.286313	0.0946223	-1.59734	1.68663	0.0916741	0.424437	no
Rinl	chr7:29573987-29583984	CR_Ileum	GF_Ileum	1.14283	0.378301	-1.59501	1.79543	0.0725855	0.36731	no
Klrb1c	chr6:128728502-128738659	CR_Ileum	GF_Ileum	0.0880534	0.0291605	-1.59436	0.98902	0.322653	1	no
-	chr14:79728341-79729292	CR_Ileum	GF_Ileum	0.0944114	0.0312797	-1.59374	0.714286	0.47505	1	no
-	chr11:43229423-43230563	CR_Ileum	GF_Ileum	0.113534	0.0376372	-1.5929	0.809923	0.417984	1	no
Rgs13	chr1:145984290-146024502	CR_Ileum	GF_Ileum	14.0939	4.67573	-1.59181	2.15473	0.0311831	0.21006	no
Rgs10	chr7:135517138-135561686	CR_Ileum	GF_Ileum	0.313671	0.104091	-1.59141	1.12953	0.258672	0.743288	no
-	chr11:52290817-52295348	CR_Ileum	GF_Ileum	0.050745	0.0168484	-1.59065	1.06596	0.286443	1	no
Ppm1e	chr11:86922762-87172496	CR_Ileum	GF_Ileum	0.0293159	0.0097462	-1.58877	0.214757	0.829957	1	no
5830432E09Rik	chr7:142726679-142877977	CR_Ileum	GF_Ileum	0.0828129	0.0275442	-1.58811	0.123307	0.901864	1	no
-	chr10:31218497-31219347	CR_Ileum	GF_Ileum	0.216484	0.0720558	-1.58707	0.880238	0.37873	1	no
4931423N10Rik	chr2:23062995-23122649	CR_Ileum	GF_Ileum	0.0217259	0.00723176	-1.587	0.553289	0.580065	1	no
Nes	chr3:87775014-87784373	CR_Ileum	GF_Ileum	0.022967	0.00765925	-1.58429	0.983737	0.325245	1	no
Cd52	chr4:133649452-133650988	CR_Ileum	GF_Ileum	4.42759	1.47748	-1.58338	1.69681	0.0897335	0.418967	no
Tgfb1	chr7:26472020-26490015	CR_Ileum	GF_Ileum	0.846272	0.282944	-1.5806	1.87175	0.0612412	0.329776	no
Fgfr1op	chr17:8358357-8389473	CR_Ileum	GF_Ileum	0.295245	0.0987755	-1.57969	0.148479	0.881965	0.999999	no
Efr3b	chr12:3962553-4038915	CR_Ileum	GF_Ileum	0.572442	0.191517	-1.57966	2.1468	0.0318092	0.213082	no
Sall2	chr14:52930855-52948345	CR_Ileum	GF_Ileum	0.350575	0.117458	-1.57758	1.7426	0.0814042	0.394628	no
Eepd1	chr9:25289181-25411695	CR_Ileum	GF_Ileum	12.0707	4.04459	-1.57745	2.46759	0.0136026	0.116035	no
Cfhr1	chr1:141443640-141456799	CR_Ileum	GF_Ileum	0.0231125	0.00774586	-1.57718	0.547046	0.584347	1	no
1810041L15Rik	chr15:84209632-84277527	CR_Ileum	GF_Ileum	0.0441996	0.0148324	-1.57528	0.893404	0.371641	1	no
-	chr3:24651592-24651997	CR_Ileum	GF_Ileum	0.323665	0.108624	-1.57515	0.707814	0.479061	0.943464	no
Pla2g2e	chr4:138433591-138438942	CR_Ileum	GF_Ileum	0.410145	0.137819	-1.57336	1.21149	0.22571	0.697657	no
Cfi	chr3:129539656-129578246	CR_Ileum	GF_Ileum	0.650511	0.218664	-1.57286	1.67824	0.0933	0.428997	no
Nxph4	chr10:126962528-126971615	CR_Ileum	GF_Ileum	0.096011	0.0322941	-1.57193	0.973599	0.330256	1	no
-	chr10:126412300-126412735	CR_Ileum	GF_Ileum	0.142032	0.0478419	-1.56987	0.549623	0.582578	1	no
Akap14	chrX:34666757-34708837	CR_Ileum	GF_Ileum	0.0221314	0.00745672	-1.56948	0.101022	0.919533	1	no
Pcdhb17	chr18:37089938-38001526	CR_Ileum	GF_Ileum	0.0345815	0.011654	-1.56918	0.168805	0.86595	1	no
Plat	chr8:23868215-23893320	CR_Ileum	GF_Ileum	1.71443	0.579519	-1.5648	2.09189	0.0364484	0.234007	no
Tmem92-ps	chr11:94616443-94693316	CR_Ileum	GF_Ileum	0.00729763	0.00246799	-1.56409	0.0382741	0.969469	1	no
-	chr4:3158372-3184327	CR_Ileum	GF_Ileum	0.187072	0.063378	-1.56154	0.433653	0.66454	1	no
Olfr1532-ps1	chr7:114057713-114058637	CR_Ileum	GF_Ileum	0.0478309	0.016211	-1.56097	0.544373	0.586185	1	no
-	chr15:63901834-63902594	CR_Ileum	GF_Ileum	0.395785	0.134176	-1.5606	1.11016	0.266928	0.75445	no
Ly9	chr1:173518743-173537491	CR_Ileum	GF_Ileum	0.209696	0.0711145	-1.56008	1.29654	0.194791	1	no
-	chr3:8014349-8015562	CR_Ileum	GF_Ileum	0.102865	0.0349654	-1.55676	0.785181	0.432347	1	no
P2ry13	chr3:58810899-59148178	CR_Ileum	GF_Ileum	0.0300916	0.0102294	-1.55664	0.391419	0.695488	1	no
-	chr9:106152143-106153312	CR_Ileum	GF_Ileum	0.178774	0.0607921	-1.55619	0.938912	0.347776	1	no
Mfi2	chr16:31878895-31899105	CR_Ileum	GF_Ileum	0.143465	0.0487965	-1.55585	1.24426	0.213406	1	no
-	chr11:58043929-58044837	CR_Ileum	GF_Ileum	0.0487096	0.0165696	-1.55567	0.541686	0.588035	1	no
-	chr7:132725529-132726395	CR_Ileum	GF_Ileum	0.33411	0.113656	-1.55566	1.11603	0.264408	0.751452	no
-	chr18:38339508-38340244	CR_Ileum	GF_Ileum	0.191607	0.0652159	-1.55486	0.789993	0.429532	1	no
Zfp286	chr11:62591888-62602919	CR_Ileum	GF_Ileum	0.0249233	0.00849632	-1.55259	0.702055	0.482645	1	no
Nanog,Nanogpd	chr6:122657585-122663796	CR_Ileum	GF_Ileum	0.0268316	0.00915823	-1.55079	0.304356	0.760857	1	no
Tmprss6	chr15:78270096-78299064	CR_Ileum	GF_Ileum	0.0349609	0.0119414	-1.54978	0.894282	0.371171	1	no
Camk2b	chr11:5869594-5965751	CR_Ileum	GF_Ileum	53.5109	18.2831	-1.54932	2.10162	0.0355869	0.23021	no
-	chr5:106248771-106249436	CR_Ileum	GF_Ileum	0.218834	0.0748555	-1.54766	0.785542	0.432136	1	no
Sema3a	chr5:13396783-13603485	CR_Ileum	GF_Ileum	0.00561505	0.00192158	-1.54701	0.314672	0.753011	1	no
-	chr14:54766184-54767182	CR_Ileum	GF_Ileum	0.149757	0.0512813	-1.54612	0.883893	0.376754	1	no
Pilra	chr5:138229029-138277506	CR_Ileum	GF_Ileum	0.0860239	0.0294648	-1.54574	0.609722	0.542046	1	no
Fcgr3	chr1:172981299-172989534	CR_Ileum	GF_Ileum	0.160277	0.0549154	-1.54529	1.0588	0.289693	1	no
Ptprt	chr2:161352486-162486883	CR_Ileum	GF_Ileum	0.1164	0.0399051	-1.54444	1.11976	0.262815	1	no
-	chrX:101147240-101148107	CR_Ileum	GF_Ileum	0.204851	0.0702606	-1.54379	0.852411	0.393986	1	no
Abcc12	chr8:89028739-89090489	CR_Ileum	GF_Ileum	0.00807421	0.00277036	-1.54325	0.53266	0.594269	1	no
Fcer2a	chr8:3681736-3694174	CR_Ileum	GF_Ileum	0.0898069	0.0308278	-1.54259	1.05523	0.291322	1	no
Glt25d2	chr1:154246996-154357825	CR_Ileum	GF_Ileum	0.00901757	0.00309596	-1.54235	0.522695	0.601187	1	no
Hspb1	chr5:136363788-136365570	CR_Ileum	GF_Ileum	1.56607	0.537938	-1.54163	1.23121	0.218246	0.685712	no
-	chr12:86422853-86423903	CR_Ileum	GF_Ileum	0.20151	0.0692528	-1.54091	0.923331	0.355835	1	no
-	chr6:53966187-53968018	CR_Ileum	GF_Ileum	0.202724	0.069735	-1.53957	1.08896	0.276171	1	no
-	chr12:112081834-112083410	CR_Ileum	GF_Ileum	0.213277	0.0733715	-1.53944	1.17507	0.239967	1	no
Samd4	chr14:47502639-47725492	CR_Ileum	GF_Ileum	0.00566095	0.00194837	-1.53877	0.22928	0.818651	1	no
-	chr8:129365435-129374076	CR_Ileum	GF_Ileum	2.30436	0.793162	-1.53868	1.21913	0.222797	0.693003	no
Tigit	chr16:43648973-43664297	CR_Ileum	GF_Ileum	0.559792	0.192703	-1.53851	1.3245	0.185337	0.631747	no
Spib	chr7:51781364-51787441	CR_Ileum	GF_Ileum	8.42904	2.90264	-1.538	2.39336	0.0166949	0.134682	no
Gpr123	chr7:147020072-147063987	CR_Ileum	GF_Ileum	0.00759761	0.002621	-1.53543	0.523132	0.600883	1	no
Map4k1	chr7:29767872-29788297	CR_Ileum	GF_Ileum	0.735548	0.253849	-1.53485	1.81352	0.0697511	0.358224	no
Snhg1,Snord22	chr19:8797973-8800932	CR_Ileum	GF_Ileum	90.7084	31.3336	-1.53353	0.28249	0.777568	0.999999	no
Stox1	chr10:62122169-62188847	CR_Ileum	GF_Ileum	0.0270852	0.00935777	-1.53327	0.738167	0.460413	1	no
Hmx3	chr7:138685902-138689496	CR_Ileum	GF_Ileum	2.22909	0.770557	-1.53248	1.38446	0.166217	0.595783	no
Cpvl	chr6:53814456-53951364	CR_Ileum	GF_Ileum	1.61395	0.557952	-1.53238	1.08872	0.276277	0.76649	no
C030034L19Rik	chr3:9403077-9413903	CR_Ileum	GF_Ileum	0.0492713	0.0170393	-1.53188	0.902807	0.366628	1	no
-	chr7:135102106-135140693	CR_Ileum	GF_Ileum	0.187176	0.0647831	-1.53071	0.0403726	0.967796	1	no
Gbp7	chr3:142193301-142213047	CR_Ileum	GF_Ileum	1.05558	0.365388	-1.53054	2.20334	0.0275707	0.192776	no
-	chr15:100880624-100909332	CR_Ileum	GF_Ileum	0.0809361	0.0280205	-1.5303	0.157452	0.874889	1	no
Mras	chr9:99285838-99337131	CR_Ileum	GF_Ileum	0.170637	0.059104	-1.5296	1.46572	0.142725	1	no
-	chr5:151840089-152036832	CR_Ileum	GF_Ileum	0.143013	0.0495552	-1.52904	0.119931	0.904538	1	no
Gpr97	chr8:97541591-97569149	CR_Ileum	GF_Ileum	0.107308	0.037197	-1.5285	0.481732	0.629996	1	no
AI836003	chr15:97998236-98000565	CR_Ileum	GF_Ileum	0.0322345	0.0111787	-1.52785	0.69133	0.489358	1	no
Ccr9	chr9:123676328-123692575	CR_Ileum	GF_Ileum	0.667233	0.231454	-1.52746	1.89044	0.0586991	0.321013	no
-	chr19:47225478-47232351	CR_Ileum	GF_Ileum	0.692113	0.240177	-1.52691	1.52743	0.126653	0.512656	no
Hcrtr1	chr4:129807460-129816406	CR_Ileum	GF_Ileum	0.0697979	0.0242572	-1.52477	0.699681	0.484127	1	no
-	chr7:77878352-77878897	CR_Ileum	GF_Ileum	0.322296	0.112095	-1.52367	0.865472	0.38678	0.880122	no
Igtp	chr11:58013057-58021094	CR_Ileum	GF_Ileum	7.87158	2.74075	-1.52208	2.09657	0.0360319	0.232105	no
Chi3l1	chr1:136078980-136086608	CR_Ileum	GF_Ileum	0.137057	0.0478036	-1.51959	0.921125	0.356985	1	no
Foxc1	chr13:31898514-31902504	CR_Ileum	GF_Ileum	0.0219716	0.00766762	-1.51879	0.728938	0.46604	1	no
Bst1	chr5:44210121-44235331	CR_Ileum	GF_Ileum	69.8276	24.37	-1.51869	2.22134	0.0263281	0.186757	no
Slc12a4	chr8:108467492-108489939	CR_Ileum	GF_Ileum	0.0602513	0.0210369	-1.51807	1.06178	0.288336	1	no
Zfp940	chr7:30628954-30638667	CR_Ileum	GF_Ileum	0.216791	0.0757791	-1.51644	0.939417	0.347517	1	no
A430089I19Rik	chr5:94731543-94735821	CR_Ileum	GF_Ileum	0.000933892	0.00032647	-1.51631	0.112215	0.910653	1	no
Gp2	chr7:126586057-126602786	CR_Ileum	GF_Ileum	0.355151	0.124172	-1.51609	1.34209	0.179567	0.621349	no
Elk3	chr10:92710160-92773904	CR_Ileum	GF_Ileum	0.316903	0.110816	-1.51587	1.13118	0.257978	0.74237	no
-	chr1:179357890-179358244	CR_Ileum	GF_Ileum	0.402321	0.140773	-1.51498	0.664019	0.506678	0.955728	no
Clec1b	chr6:129347314-129355431	CR_Ileum	GF_Ileum	0.0347346	0.0121638	-1.51378	0.301544	0.763	1	no
-	chr18:65011705-65045869	CR_Ileum	GF_Ileum	0.271745	0.0952193	-1.51293	0.378419	0.705119	0.999999	no
-	chr1:182850928-182868532	CR_Ileum	GF_Ileum	0.047078	0.016507	-1.51197	0.432867	0.665112	1	no
Marcksl1	chr4:129172270-129193225	CR_Ileum	GF_Ileum	48.2685	16.9377	-1.51084	2.59264	0.00952435	0.0890764	no
Kcnk3	chr5:30876359-30927643	CR_Ileum	GF_Ileum	0.0855032	0.0300133	-1.51038	1.08131	0.279561	1	no
Fcrl1	chr3:87180308-87196055	CR_Ileum	GF_Ileum	0.0379666	0.0133366	-1.50934	0.408341	0.683023	1	no
-	chr5:33015515-33016310	CR_Ileum	GF_Ileum	0.167707	0.0589117	-1.50932	0.771611	0.440345	1	no
Gpr27	chr6:99642491-99645029	CR_Ileum	GF_Ileum	0.314251	0.110445	-1.50859	1.29426	0.195575	0.649414	no
S100a7a	chr3:90458223-90462052	CR_Ileum	GF_Ileum	0.0612895	0.0215433	-1.5084	0.519848	0.603169	1	no
Ptger2	chr14:45607785-45623495	CR_Ileum	GF_Ileum	0.0190045	0.00668958	-1.50635	0.675776	0.499183	1	no
-	chr2:172989367-172991166	CR_Ileum	GF_Ileum	0.04216	0.0148488	-1.50553	0.678751	0.497296	1	no
Fes	chr7:87522642-87532885	CR_Ileum	GF_Ileum	1.7434	0.614305	-1.50487	1.7269	0.0841855	0.403192	no
Grap2	chr15:80402998-80487146	CR_Ileum	GF_Ileum	0.741858	0.261574	-1.50392	1.2978	0.194357	0.647495	no
-	chr19:60262423-60267810	CR_Ileum	GF_Ileum	0.115381	0.0407169	-1.50271	1.39905	0.161799	1	no
-	chr2:79472864-79474273	CR_Ileum	GF_Ileum	0.250128	0.0883055	-1.50209	1.18652	0.235415	1	no
-	chr12:88172062-88173417	CR_Ileum	GF_Ileum	0.0580071	0.020482	-1.50187	0.666281	0.505231	1	no
-	chrX:8450716-8451470	CR_Ileum	GF_Ileum	0.119134	0.0421027	-1.5006	0.674686	0.499875	1	no
Pde6a	chr18:61380152-61449372	CR_Ileum	GF_Ileum	0.169208	0.0598141	-1.50024	1.41886	0.155941	1	no
Gpr64	chrX:156828523-156936002	CR_Ileum	GF_Ileum	0.309225	0.109385	-1.49924	0.844957	0.398135	0.889295	no
Il23a	chr10:127733195-127735140	CR_Ileum	GF_Ileum	0.0865261	0.0306184	-1.49874	0.769508	0.441592	1	no
Fxyd6	chr9:45178267-45204242	CR_Ileum	GF_Ileum	0.317738	0.112513	-1.49775	0.815188	0.414964	0.901864	no
Purb	chr11:6367600-6387695	CR_Ileum	GF_Ileum	5.99273	2.12269	-1.49732	0.244498	0.806845	0.999999	no
Cav2	chr6:17231340-17239011	CR_Ileum	GF_Ileum	0.0443252	0.0157129	-1.49617	0.763298	0.445286	1	no
-	chr5:110211240-110508391	CR_Ileum	GF_Ileum	47.4401	16.8276	-1.49528	0.142116	0.886988	0.999999	no
Trpa1	chr1:14862728-14908943	CR_Ileum	GF_Ileum	0.0248514	0.00881647	-1.49505	0.761498	0.44636	1	no
1810046K07Rik	chr9:51097783-51137044	CR_Ileum	GF_Ileum	8.11759	2.87994	-1.49501	1.85956	0.0629476	0.335562	no
-	chr9:105064796-105423674	CR_Ileum	GF_Ileum	0.189704	0.0673086	-1.49489	0.108078	0.913934	1	no
Slc22a13b	chr9:119129426-119140810	CR_Ileum	GF_Ileum	0.186383	0.066263	-1.492	0.496423	0.619596	1	no
Spata6	chr4:111392614-111501745	CR_Ileum	GF_Ileum	0.16427	0.0584933	-1.48973	1.09229	0.274706	1	no
Podxl	chr6:31469492-31513937	CR_Ileum	GF_Ileum	0.123415	0.043981	-1.48857	1.36183	0.173253	1	no
-	chr19:53029815-53031697	CR_Ileum	GF_Ileum	0.27846	0.0992446	-1.48841	1.27952	0.200713	0.658268	no
-	chr4:33337346-33338202	CR_Ileum	GF_Ileum	0.200349	0.0714119	-1.48828	0.830095	0.406485	1	no
-	chr9:108552054-108553142	CR_Ileum	GF_Ileum	0.0926346	0.0330338	-1.48761	0.717193	0.473255	1	no
Zfp57	chr17:37138107-37147674	CR_Ileum	GF_Ileum	0.0220044	0.00784715	-1.48755	0.228626	0.81916	1	no
Gm11062	chr1:175204591-175207887	CR_Ileum	GF_Ileum	54.2177	19.3421	-1.48702	2.79001	0.00527059	0.0568359	no
Cntln	chr4:84530230-84777822	CR_Ileum	GF_Ileum	0.0491825	0.0175478	-1.48685	0.941754	0.346319	1	no
-	chr15:36830822-36831835	CR_Ileum	GF_Ileum	0.24319	0.0868153	-1.48606	0.940461	0.346981	1	no
Slc9a3	chr13:74258585-74346262	CR_Ileum	GF_Ileum	12.8729	4.5967	-1.48566	1.47926	0.139072	0.540554	no
-	chr12:76918403-76919179	CR_Ileum	GF_Ileum	0.170268	0.0608046	-1.48556	0.75792	0.448499	1	no
Myo9a	chr9:59598876-59788841	CR_Ileum	GF_Ileum	50.1688	17.9206	-1.48517	0.114336	0.908971	0.999999	no
-	chr6:3912445-3938968	CR_Ileum	GF_Ileum	0.394197	0.140855	-1.48471	0.230365	0.817808	0.999999	no
Gm5431	chr11:48697331-48715654	CR_Ileum	GF_Ileum	4.01928	1.43652	-1.48436	2.03387	0.0419648	0.2574	no
Gm9839	chr1:32229650-32714583	CR_Ileum	GF_Ileum	0.00208079	0.000743716	-1.4843	0.0241204	0.980757	1	no
Gm16897	chr1:196765014-196803153	CR_Ileum	GF_Ileum	0.0436029	0.0155903	-1.48378	0.403448	0.686619	1	no
Gm2061	chr1:187253235-187292650	CR_Ileum	GF_Ileum	5.81925	2.08079	-1.48371	0.741493	0.458395	0.931451	no
Dzip1	chr14:119274741-119322389	CR_Ileum	GF_Ileum	0.0434087	0.0155281	-1.4831	1.00925	0.312853	1	no
Cxcr6	chr9:123698625-123761020	CR_Ileum	GF_Ileum	0.498604	0.178666	-1.48063	0.320628	0.748493	0.999999	no
Igsf6	chr7:128177958-128220382	CR_Ileum	GF_Ileum	0.154491	0.0553648	-1.48048	0.145501	0.884316	1	no
-	chr7:138684280-138685656	CR_Ileum	GF_Ileum	0.421751	0.15126	-1.47936	1.1991	0.230491	0.704921	no
Evi2a,Evi2b	chr11:79150515-79395111	CR_Ileum	GF_Ileum	0.558401	0.20067	-1.47648	0.0871911	0.93052	0.999999	no
-	chr8:10857396-10858452	CR_Ileum	GF_Ileum	0.11476	0.0412655	-1.47561	0.749019	0.453846	1	no
Bend4	chr5:67783385-67819038	CR_Ileum	GF_Ileum	0.314367	0.113054	-1.47544	1.76397	0.0777363	0.383232	no
Wdfy4	chr14:33772732-33998252	CR_Ileum	GF_Ileum	0.0838182	0.0301562	-1.47481	1.42569	0.153959	1	no
-	chr17:21178550-21179139	CR_Ileum	GF_Ileum	0.773072	0.27819	-1.47453	1.15044	0.249961	0.732051	no
Chat	chr14:33220632-33279227	CR_Ileum	GF_Ileum	0.937481	0.337637	-1.47332	1.86064	0.0627947	0.334942	no
Glp1r	chr17:31038811-31077818	CR_Ileum	GF_Ileum	0.319755	0.115309	-1.47146	1.62983	0.103138	0.45613	no
-	chr17:28904045-28904511	CR_Ileum	GF_Ileum	0.509463	0.183723	-1.47144	0.921694	0.356688	0.853799	no
Vav1	chr17:57418522-57468659	CR_Ileum	GF_Ileum	4.9828	1.79758	-1.4709	2.35601	0.0184722	0.145211	no
A930019D19Rik	chr2:146065642-146337917	CR_Ileum	GF_Ileum	0.04293	0.0154983	-1.46988	0.0402061	0.967929	1	no
Il1b	chr2:129190315-129201469	CR_Ileum	GF_Ileum	0.116205	0.0419681	-1.46931	0.494505	0.620949	1	no
Mei1	chr15:81900546-81957244	CR_Ileum	GF_Ileum	0.0469585	0.0169639	-1.46892	0.91637	0.359473	1	no
Gpr114	chr8:97447593-97467190	CR_Ileum	GF_Ileum	0.802313	0.289896	-1.46863	1.2376	0.215864	0.682002	no
-	chr14:55062620-55063480	CR_Ileum	GF_Ileum	0.0490692	0.0177472	-1.46723	0.497495	0.61884	1	no
-	chr10:70866948-70868614	CR_Ileum	GF_Ileum	0.224564	0.0812482	-1.46672	1.15071	0.249851	1	no
-	chr13:23618373-23622785	CR_Ileum	GF_Ileum	0.223395	0.0808493	-1.46629	1.06301	0.287777	1	no
Pthlh	chr6:147200631-147212607	CR_Ileum	GF_Ileum	0.0498722	0.0180594	-1.46549	0.655834	0.511931	1	no
-	chr2:79469378-79472082	CR_Ileum	GF_Ileum	0.290134	0.105062	-1.46548	1.388	0.165138	0.593619	no
-	chr18:12130926-12131839	CR_Ileum	GF_Ileum	0.181642	0.0658232	-1.46443	0.818298	0.413187	1	no
-	chr7:36182056-36251053	CR_Ileum	GF_Ileum	0.269119	0.0975729	-1.46369	0.025698	0.979498	0.999999	no
-	chr17:69743211-69743803	CR_Ileum	GF_Ileum	0.356053	0.129179	-1.46272	0.92476	0.355091	0.8524	no
Tcfap2b	chr1:19198994-19228815	CR_Ileum	GF_Ileum	0.0113124	0.00410786	-1.46145	0.417499	0.676314	1	no
Arid3a	chr10:79389816-79417757	CR_Ileum	GF_Ileum	1.39678	0.507281	-1.46125	1.81189	0.0700032	0.358971	no
Nos2	chr11:78734242-78773792	CR_Ileum	GF_Ileum	45.1381	16.4023	-1.46045	2.74307	0.00608677	0.0634532	no
-	chr18:65011705-65045869	CR_Ileum	GF_Ileum	0.43228	0.157093	-1.46035	0.803604	0.421626	0.906651	no
-	chr18:12136946-12137921	CR_Ileum	GF_Ileum	0.2285	0.0830497	-1.46015	0.996944	0.318792	1	no
1300017J02Rik	chr9:103152859-103190627	CR_Ileum	GF_Ileum	0.0157754	0.00573375	-1.46013	0.506405	0.612573	1	no
Drd4	chr7:148477904-148480900	CR_Ileum	GF_Ileum	0.198067	0.0719918	-1.46008	1.05142	0.293066	1	no
-	chr17:35109647-35118716	CR_Ileum	GF_Ileum	0.121436	0.044145	-1.45987	0.135538	0.892186	1	no
Fam113b	chr15:97074504-97216122	CR_Ileum	GF_Ileum	0.251937	0.0916361	-1.45908	1.04519	0.295934	1	no
-	chr8:48747844-48749216	CR_Ileum	GF_Ileum	0.305648	0.111204	-1.45866	1.21944	0.222678	0.692789	no
Lair1	chr7:3958674-4014806	CR_Ileum	GF_Ileum	0.078403	0.0286193	-1.45392	0.945935	0.344182	1	no
Acap1	chr11:69691765-69709130	CR_Ileum	GF_Ileum	1.41035	0.514855	-1.45382	0.730957	0.464805	0.935505	no
-	chr14:79133949-79134638	CR_Ileum	GF_Ileum	0.0650611	0.0237645	-1.45299	0.503857	0.614362	1	no
Bmp8a	chr4:122986580-123020925	CR_Ileum	GF_Ileum	4.28309	1.56469	-1.45278	1.54377	0.122643	0.502933	no
Sh2d2a	chr3:87650676-87659644	CR_Ileum	GF_Ileum	0.361059	0.132015	-1.45153	1.06295	0.287806	0.780726	no
-	chr10:68613986-68637190	CR_Ileum	GF_Ileum	0.645801	0.236218	-1.45097	0.964814	0.334638	0.832514	no
Kcnb1	chr2:166928882-167015341	CR_Ileum	GF_Ileum	0.14753	0.0539721	-1.45072	1.23047	0.218521	1	no
-	chr4:40801540-40802386	CR_Ileum	GF_Ileum	0.099073	0.0362458	-1.45068	0.64062	0.521769	1	no
Fcrl5	chr3:87239703-87317238	CR_Ileum	GF_Ileum	0.573609	0.210254	-1.44793	0.978108	0.328021	0.825507	no
Igf2	chr7:149836672-149856261	CR_Ileum	GF_Ileum	2.36523	0.867374	-1.44725	1.96624	0.0492707	0.286462	no
-	chr3:24312282-24332132	CR_Ileum	GF_Ileum	0.164243	0.0602688	-1.44635	0.498522	0.618116	1	no
-	chr13:75640864-75642766	CR_Ileum	GF_Ileum	0.257258	0.0944112	-1.44619	1.21923	0.222758	1	no
Igsf21	chr4:139582766-139802726	CR_Ileum	GF_Ileum	0.0657763	0.0241422	-1.44601	0.86586	0.386567	1	no
-	chr18:6018405-6019071	CR_Ileum	GF_Ileum	0.203235	0.0747	-1.44397	0.714855	0.474698	1	no
Spin2	chrX:150266835-150268783	CR_Ileum	GF_Ileum	0.0872049	0.0320655	-1.44339	0.735626	0.461958	1	no
-	chr15:56597038-56610827	CR_Ileum	GF_Ileum	0.0838785	0.0308541	-1.44284	0.430305	0.666974	1	no
Dpp6	chr5:27143896-28054040	CR_Ileum	GF_Ileum	0.00749585	0.00275738	-1.44279	0.211912	0.832176	1	no
-	chr16:11187608-11188239	CR_Ileum	GF_Ileum	0.145965	0.053705	-1.44249	0.643699	0.519771	1	no
Zfp366	chr13:99954777-100016987	CR_Ileum	GF_Ileum	0.0126444	0.00465757	-1.44086	0.495019	0.620587	1	no
Oxct2b	chr4:122782014-122817188	CR_Ileum	GF_Ileum	0.228185	0.0841596	-1.43901	0.30876	0.757504	1	no
Aldoart2	chr12:56666121-56667696	CR_Ileum	GF_Ileum	0.0701417	0.0258725	-1.43885	0.733129	0.46348	1	no
Trim6	chr7:111367308-111383666	CR_Ileum	GF_Ileum	0.299803	0.1107	-1.43736	1.25787	0.208437	0.670681	no
Mir680-2	chrX:140732332-140732442	CR_Ileum	GF_Ileum	119.658	44.1876	-1.43721	0.982788	0.325712	0.823003	no
-	chr17:66131397-66132014	CR_Ileum	GF_Ileum	0.47976	0.177379	-1.43548	1.00624	0.314302	0.810413	no
-	chr19:29423118-29462584	CR_Ileum	GF_Ileum	0.0872202	0.0322475	-1.43548	0.0575603	0.954099	1	no
-	chr2:102781223-102797272	CR_Ileum	GF_Ileum	0.575282	0.212871	-1.43429	1.05871	0.289734	0.782536	no
-	chr10:74947768-74949111	CR_Ileum	GF_Ileum	0.0980666	0.0362879	-1.43427	0.827327	0.408052	1	no
Zfp382	chr7:30906966-30920051	CR_Ileum	GF_Ileum	0.0323253	0.0119874	-1.43115	0.644785	0.519067	1	no
-	chrX:12783575-12784808	CR_Ileum	GF_Ileum	0.0308248	0.0114328	-1.43091	0.489459	0.624517	1	no
Foxo6	chr4:119939682-119960343	CR_Ileum	GF_Ileum	12.2122	4.53564	-1.42895	1.96195	0.049768	0.288432	no
C730036E19Rik	chr1:152985163-152991225	CR_Ileum	GF_Ileum	0.103539	0.0384931	-1.42751	0.885131	0.376086	1	no
-	chr13:75923989-75924937	CR_Ileum	GF_Ileum	0.0844156	0.0314026	-1.42663	0.640659	0.521744	1	no
-	chr8:129442169-129443749	CR_Ileum	GF_Ileum	0.0461634	0.0171793	-1.42608	0.634054	0.526045	1	no
-	chr2:22599504-22600083	CR_Ileum	GF_Ileum	0.0814786	0.0303931	-1.42268	0.49265	0.62226	1	no
Trim17	chr11:58745789-58804960	CR_Ileum	GF_Ileum	0.043023	0.0160645	-1.42123	0.0445786	0.964443	1	no
-	chr4:129172270-129193225	CR_Ileum	GF_Ileum	0.117008	0.0436937	-1.42112	0.123161	0.90198	1	no
1700001G17Rik	chr1:33726668-33727557	CR_Ileum	GF_Ileum	0.0911191	0.034033	-1.42082	0.640528	0.52183	1	no
Gnb3	chr6:124784257-124790293	CR_Ileum	GF_Ileum	0.0424269	0.0158591	-1.41967	0.673826	0.500422	1	no
Hist1h4b	chr13:23848889-23849201	CR_Ileum	GF_Ileum	0.408926	0.152862	-1.41961	0.665649	0.505636	0.955266	no
-	chr5:80067357-80067429	CR_Ileum	GF_Ileum	4382.92	1639.37	-1.41875	1.05685	0.290579	0.783674	no
Ppp1r16b	chr2:158492468-158592070	CR_Ileum	GF_Ileum	0.443875	0.166151	-1.41766	1.57239	0.11586	0.486764	no
Isg15	chr4:155573532-155587690	CR_Ileum	GF_Ileum	21.0786	7.89048	-1.4176	2.12534	0.0335585	0.220976	no
-	chr2:24270948-24271696	CR_Ileum	GF_Ileum	0.113665	0.0425512	-1.41751	0.638354	0.523243	1	no
-	chr3:132292772-132310730	CR_Ileum	GF_Ileum	6.17805	2.31283	-1.41749	1.95107	0.0510488	0.293283	no
0610009B14Rik	chr12:81787361-81793453	CR_Ileum	GF_Ileum	0.084702	0.0317772	-1.4144	0.634834	0.525537	1	no
Hey1	chr3:8663358-8667038	CR_Ileum	GF_Ileum	0.0724825	0.0272037	-1.41383	0.905263	0.365326	1	no
9930111J21Rik2	chr11:48851161-48948889	CR_Ileum	GF_Ileum	0.432275	0.162299	-1.41329	0.433883	0.664373	0.999999	no
-	chr4:106230220-106230882	CR_Ileum	GF_Ileum	0.0668703	0.0251086	-1.41318	0.488858	0.624942	1	no
Ido1	chr8:25694599-25707481	CR_Ileum	GF_Ileum	30.3191	11.3908	-1.41235	1.89959	0.057487	0.316802	no
-	chr12:14135425-14136570	CR_Ileum	GF_Ileum	0.231893	0.0873629	-1.40837	0.927541	0.353646	1	no
Sp140	chr1:87344098-87541670	CR_Ileum	GF_Ileum	0.316445	0.119229	-1.40822	0.889276	0.373855	0.869391	no
1700125D06Rik	chr4:129168433-129169200	CR_Ileum	GF_Ileum	0.0851784	0.0321023	-1.40781	0.486999	0.626259	1	no
-	chr2:160193389-160193975	CR_Ileum	GF_Ileum	0.268365	0.10123	-1.40655	0.79349	0.427492	0.91067	no
Dusp2	chr2:127161894-127164113	CR_Ileum	GF_Ileum	0.138616	0.0522983	-1.40626	0.91742	0.358923	1	no
-	chr11:120177688-120178591	CR_Ileum	GF_Ileum	0.0441648	0.0166849	-1.40435	0.485087	0.627614	1	no
Prdm1	chr10:44156980-44178493	CR_Ileum	GF_Ileum	2.41856	0.914047	-1.40381	1.95307	0.0508112	0.292388	no
Tdpoz1	chr3:93473254-93480205	CR_Ileum	GF_Ileum	0.00468944	0.00177288	-1.40332	0.270941	0.786436	1	no
-	chr11:97523796-97524623	CR_Ileum	GF_Ileum	0.147958	0.0559769	-1.40228	0.715331	0.474404	1	no
-	chr5:110211240-110508391	CR_Ileum	GF_Ileum	0.141299	0.0534679	-1.40201	0.0895294	0.928661	1	no
Adamts4	chr1:173180552-173190053	CR_Ileum	GF_Ileum	0.00907882	0.00343588	-1.40183	0.483487	0.62875	1	no
Cd160	chr3:96600570-96709252	CR_Ileum	GF_Ileum	0.970843	0.367443	-1.40172	0.0229486	0.981691	0.999999	no
Dusp6	chr10:98725864-98730123	CR_Ileum	GF_Ileum	28.5318	10.8005	-1.40148	2.46473	0.0137118	0.116701	no
Rassf2	chr2:131818585-131855724	CR_Ileum	GF_Ileum	0.325736	0.123337	-1.4011	1.60083	0.109415	0.471712	no
-	chr4:145177348-145177417	CR_Ileum	GF_Ileum	1174.95	445.004	-1.40071	0.621223	0.534453	0.969281	no
Limd2	chr11:105945888-106021465	CR_Ileum	GF_Ileum	2.64973	1.00365	-1.40059	1.06389	0.287379	0.780223	no
Gabra1	chr11:41944981-41996432	CR_Ileum	GF_Ileum	0.0718595	0.0272237	-1.40031	0.992578	0.320916	1	no
Dkkl1	chr7:52462894-52467253	CR_Ileum	GF_Ileum	0.0440375	0.0166849	-1.40019	0.475098	0.634717	1	no
Gp9	chr6:87728129-87729756	CR_Ileum	GF_Ileum	0.0504572	0.0191356	-1.3988	0.480436	0.630917	1	no
Efhb	chr17:53538213-53602646	CR_Ileum	GF_Ileum	0.3453	0.131008	-1.39819	1.36601	0.171937	0.606849	no
-	chr7:96644754-96645542	CR_Ileum	GF_Ileum	0.232784	0.0883585	-1.39755	0.866469	0.386233	1	no
-	chr7:31631422-31632183	CR_Ileum	GF_Ileum	0.297832	0.113162	-1.39611	0.930696	0.352011	0.849676	no
Itgal	chr7:134439850-134478639	CR_Ileum	GF_Ileum	0.311468	0.118417	-1.39521	1.31991	0.186867	0.63444	no
Trpm5	chr7:150257270-150280547	CR_Ileum	GF_Ileum	14.1207	5.36878	-1.39514	2.27954	0.0226347	0.167736	no
-	chr13:84451655-84453441	CR_Ileum	GF_Ileum	0.118101	0.044908	-1.39498	0.863073	0.388097	1	no
-	chrX:54167141-54170804	CR_Ileum	GF_Ileum	0.187946	0.0715076	-1.39415	1.32902	0.183841	1	no
-	chr13:75637950-75640675	CR_Ileum	GF_Ileum	0.32446	0.123468	-1.3939	1.42837	0.153184	0.570769	no
Dsc3	chr18:20119430-20160598	CR_Ileum	GF_Ileum	0.00614553	0.00234077	-1.39256	0.479673	0.63146	1	no
1700001L19Rik	chr13:68736315-68753108	CR_Ileum	GF_Ileum	0.0193766	0.00738322	-1.39199	0.281856	0.778054	1	no
Ifi44	chr3:151393886-151412993	CR_Ileum	GF_Ileum	0.635947	0.242399	-1.39152	1.18519	0.235941	0.712219	no
Zfp385a	chr15:103144325-103170517	CR_Ileum	GF_Ileum	0.277515	0.10579	-1.39136	1.37422	0.169373	0.60194	no
-	chr13:67103587-67104517	CR_Ileum	GF_Ileum	0.33462	0.127725	-1.38948	1.03164	0.302243	0.796469	no
Sbpl	chr17:24090051-24092240	CR_Ileum	GF_Ileum	0.0453946	0.0173365	-1.38871	0.478091	0.632585	1	no
Gm19522	chr16:42884482-42912183	CR_Ileum	GF_Ileum	0.0267582	0.0102207	-1.38849	0.605253	0.545011	1	no
-	chr18:43883904-43885006	CR_Ileum	GF_Ileum	0.205213	0.0783926	-1.38834	0.87719	0.380384	1	no
Tuba8	chr6:121160787-121176115	CR_Ileum	GF_Ileum	0.107067	0.0409597	-1.38623	0.847586	0.396669	1	no
E330021D16Rik	chr6:136350340-136364090	CR_Ileum	GF_Ileum	0.0577652	0.0221088	-1.38558	0.709118	0.478251	1	no
Gm17660	chr5:104499079-104506627	CR_Ileum	GF_Ileum	0.277466	0.106265	-1.38465	0.676541	0.498697	0.951971	no
-	chr19:32554557-32555482	CR_Ileum	GF_Ileum	0.042248	0.0161891	-1.38386	0.474108	0.635423	1	no
Itgb8	chr12:120401275-120476749	CR_Ileum	GF_Ileum	0.0214858	0.00823367	-1.38377	0.609518	0.542181	1	no
-	chr13:47066211-47107131	CR_Ileum	GF_Ileum	0.159656	0.0612187	-1.38293	0.133474	0.893819	1	no
Ddr2	chr1:171899529-172019075	CR_Ileum	GF_Ileum	0.0231329	0.00887232	-1.38256	0.542506	0.58747	1	no
-	chr14:90450882-90451632	CR_Ileum	GF_Ileum	0.110508	0.0424006	-1.382	0.60804	0.543161	1	no
-	chr9:56759404-56760282	CR_Ileum	GF_Ileum	0.201068	0.0771621	-1.38172	0.874182	0.382019	1	no
2014-09-08	chr11:53333284-53363082	CR_Ileum	GF_Ileum	0.179239	0.0688131	-1.38113	0.102321	0.918502	1	no
-	chr12:112810808-112811475	CR_Ileum	GF_Ileum	0.129334	0.0496967	-1.37988	0.619425	0.535636	1	no
-	chr2:79468663-79469274	CR_Ileum	GF_Ileum	0.219152	0.0843364	-1.37771	0.69199	0.488944	1	no
-	chr14:102997531-102998502	CR_Ileum	GF_Ileum	0.216885	0.0834649	-1.37769	0.929982	0.352381	1	no
-	chr12:85286111-85286888	CR_Ileum	GF_Ileum	0.259981	0.100148	-1.37627	0.86991	0.38435	0.878435	no
Gpr141	chr13:19841550-19916126	CR_Ileum	GF_Ileum	0.0191345	0.00737947	-1.37459	0.610509	0.541524	1	no
Atp8b2	chr3:89743402-89767430	CR_Ileum	GF_Ileum	0.50037	0.193016	-1.37427	1.39327	0.163538	0.590565	no
Cpb2	chr14:75642093-75683360	CR_Ileum	GF_Ileum	0.0240756	0.00928861	-1.37404	0.468822	0.639197	1	no
-	chr4:123575980-123576728	CR_Ileum	GF_Ileum	0.0550968	0.0212756	-1.37277	0.473384	0.635939	1	no
Barx2	chr9:31653628-31720870	CR_Ileum	GF_Ileum	7.45289	2.8782	-1.37263	2.32151	0.0202595	0.154917	no
Sla2	chr2:156688746-156712814	CR_Ileum	GF_Ileum	0.317388	0.122628	-1.37196	0.077277	0.938403	0.999999	no
Camkk1	chr11:72832509-72855567	CR_Ileum	GF_Ileum	0.3044	0.117694	-1.37093	0.801369	0.422918	0.907477	no
Kbtbd12	chr6:88563744-88577439	CR_Ileum	GF_Ileum	0.0223351	0.0086389	-1.37039	0.206725	0.836224	1	no
4933406J08Rik	chr2:122012007-122032129	CR_Ileum	GF_Ileum	0.0160773	0.0062219	-1.3696	0.457583	0.647252	1	no
-	chr17:6997089-6998515	CR_Ileum	GF_Ileum	0.262476	0.101653	-1.36853	0.903821	0.36609	0.862225	no
-	chr3:85691696-85692326	CR_Ileum	GF_Ileum	0.236718	0.0916924	-1.36829	0.764399	0.44463	1	no
-	chr6:48797577-48800745	CR_Ileum	GF_Ileum	0.33948	0.131508	-1.36818	1.40559	0.159847	0.583268	no
Ifit3	chr19:34657724-34663472	CR_Ileum	GF_Ileum	4.34934	1.68545	-1.36766	2.07324	0.0381498	0.241205	no
Ly86	chr13:37437213-37510905	CR_Ileum	GF_Ileum	0.214177	0.0830658	-1.36648	0.909188	0.363251	1	no
Prrx1	chr1:165175249-165243781	CR_Ileum	GF_Ileum	0.388994	0.150969	-1.36549	1.40542	0.159895	0.583365	no
Chsy1	chr7:73254400-73318684	CR_Ileum	GF_Ileum	0.75092	0.29165	-1.36442	1.78364	0.0744815	0.373131	no
-	chr16:20566077-20567057	CR_Ileum	GF_Ileum	0.0387787	0.0150696	-1.36363	0.469708	0.638564	1	no
Vipr2	chr12:117316195-117384798	CR_Ileum	GF_Ileum	0.0612337	0.0237996	-1.36339	0.750339	0.453051	1	no
Ikzf2	chr1:69577783-69733810	CR_Ileum	GF_Ileum	0.359656	0.139811	-1.36314	1.58282	0.113463	0.480737	no
Xkr4	chr1:3204562-3661615	CR_Ileum	GF_Ileum	0.0813717	0.0316333	-1.36308	0.461608	0.644362	1	no
Nxph3	chr11:95371159-95375879	CR_Ileum	GF_Ileum	0.478455	0.18608	-1.36246	1.4608	0.14407	0.551325	no
Krtap3-1	chr11:99427340-99427944	CR_Ileum	GF_Ileum	2.24901	0.874922	-1.36207	1.41357	0.157488	0.579076	no
G0s2	chr1:195098353-195099382	CR_Ileum	GF_Ileum	0.0467885	0.0182055	-1.36178	0.465738	0.641403	1	no
Nfatc2	chr2:168301909-168427155	CR_Ileum	GF_Ileum	0.320717	0.124815	-1.36151	0.69436	0.487456	0.946757	no
Mmp15	chr8:97876004-97917133	CR_Ileum	GF_Ileum	20.3997	7.9408	-1.36119	2.32314	0.0201716	0.154503	no
Sfpi1	chr2:90936953-90955913	CR_Ileum	GF_Ileum	0.203035	0.0790382	-1.36111	1.05844	0.289854	1	no
Cdk14	chr5:4803384-5380251	CR_Ileum	GF_Ileum	0.154816	0.0602736	-1.36096	1.34721	0.177913	1	no
Vcam1	chr3:115812937-115832606	CR_Ileum	GF_Ileum	0.00957493	0.00372992	-1.36012	0.467759	0.639957	1	no
-	chr3:94416586-94562067	CR_Ileum	GF_Ileum	0.614573	0.239422	-1.36003	0.255167	0.798594	0.999999	no
Gm572	chr4:148017425-148045681	CR_Ileum	GF_Ileum	0.0512605	0.0199701	-1.36001	0.608702	0.542722	1	no
-	chr11:88894755-88896010	CR_Ileum	GF_Ileum	0.330464	0.12883	-1.35902	1.13259	0.257387	0.741698	no
-	chr17:34685442-34685756	CR_Ileum	GF_Ileum	1.41616	0.552503	-1.35793	0.963124	0.335485	0.833643	no
-	chr2:160183455-160184829	CR_Ileum	GF_Ileum	0.194434	0.075858	-1.35791	0.905083	0.365422	1	no
Spint3	chr2:164395194-164398956	CR_Ileum	GF_Ileum	0.0831451	0.0324499	-1.35742	0.467568	0.640093	1	no
Rnf207	chr4:151671302-151692734	CR_Ileum	GF_Ileum	0.0133826	0.00522399	-1.35714	0.0391302	0.968787	1	no
Nptx2	chr5:145306755-145318347	CR_Ileum	GF_Ileum	0.0403345	0.0157466	-1.35697	0.773806	0.439045	1	no
Tbx15	chr3:99057682-99158183	CR_Ileum	GF_Ileum	0.018147	0.00708711	-1.35646	0.608844	0.542628	1	no
Lilra5	chr7:4189355-4195065	CR_Ileum	GF_Ileum	0.0159479	0.00622836	-1.35644	0.466496	0.640861	1	no
Catsper3	chr13:55885939-55910359	CR_Ileum	GF_Ileum	0.08173	0.0319232	-1.35626	0.687038	0.492059	1	no
Pik3r5	chr11:68245626-68311348	CR_Ileum	GF_Ileum	6.91928	2.70326	-1.35592	2.39992	0.0163987	0.132951	no
Bcl2a1d	chr9:88618125-88626688	CR_Ileum	GF_Ileum	0.373754	0.146051	-1.35562	0.943265	0.345545	0.843736	no
-	chr2:157309380-157310879	CR_Ileum	GF_Ileum	0.758527	0.296494	-1.3552	1.35661	0.174906	0.612248	no
Crmp1	chr5:37633318-37683372	CR_Ileum	GF_Ileum	0.173782	0.0680245	-1.35315	0.704541	0.481096	1	no
Ucn2	chr9:108888207-108889209	CR_Ileum	GF_Ileum	0.0374561	0.0146639	-1.35293	0.466022	0.6412	1	no
Art3	chr5:92760866-92843653	CR_Ileum	GF_Ileum	0.101115	0.0396039	-1.35227	0.208996	0.834451	1	no
Tmem38b	chr4:53838887-53874890	CR_Ileum	GF_Ileum	9.53431	3.73504	-1.35201	2.00803	0.0446405	0.268291	no
-	chr13:107824358-107825897	CR_Ileum	GF_Ileum	0.160951	0.063053	-1.35198	0.748795	0.453981	1	no
-	chr12:117621374-117622144	CR_Ileum	GF_Ileum	0.383581	0.150311	-1.35158	0.8779	0.379998	0.874397	no
-	chr10:94469348-94572949	CR_Ileum	GF_Ileum	5.12247	2.00813	-1.35099	0.670345	0.502638	0.953711	no
Cd79a	chr7:25682529-25687216	CR_Ileum	GF_Ileum	0.296808	0.116452	-1.3498	1.0417	0.29755	0.791517	no
Fcrla	chr1:172847724-172857714	CR_Ileum	GF_Ileum	0.0741755	0.0291035	-1.34975	0.492708	0.622219	1	no
-	chr8:97317426-97318893	CR_Ileum	GF_Ileum	0.190405	0.0747725	-1.34849	0.911729	0.361911	1	no
Lrrc17	chr5:20989664-21151423	CR_Ileum	GF_Ileum	0.2089	0.082186	-1.34585	1.1554	0.247927	1	no
Tmc2	chr2:130020929-130090181	CR_Ileum	GF_Ileum	0.0203126	0.00799562	-1.34509	0.601123	0.547758	1	no
-	chrX:54181327-54207657	CR_Ileum	GF_Ileum	0.594257	0.23397	-1.34476	0.75949	0.44756	0.92414	no
Pard6g	chr18:80243633-80316379	CR_Ileum	GF_Ileum	0.195857	0.0771467	-1.34413	1.2604	0.207526	1	no
4930432K21Rik	chr8:86671936-86696496	CR_Ileum	GF_Ileum	0.0131699	0.00519001	-1.34343	0.263435	0.792215	1	no
Apoa4	chr9:46048926-46051541	CR_Ileum	GF_Ileum	114.963	45.3208	-1.34292	2.53368	0.0112871	0.10104	no
4930473A02Rik	chr2:130275989-130389485	CR_Ileum	GF_Ileum	0.0246569	0.00972441	-1.34231	0.0544765	0.956556	1	no
Relt	chr7:107994361-108011927	CR_Ileum	GF_Ileum	0.140976	0.0556339	-1.34142	1.15579	0.247767	1	no
Mosc1	chr1:186610645-186635192	CR_Ileum	GF_Ileum	0.0529918	0.0209281	-1.34032	0.765932	0.443717	1	no
Psmb8	chr17:34335139-34338399	CR_Ileum	GF_Ileum	50.9848	20.1502	-1.33927	2.57552	0.0100089	0.0924098	no
Lef1	chr3:130813388-130926249	CR_Ileum	GF_Ileum	0.0521991	0.0206377	-1.33874	0.834074	0.404239	1	no
-	chr12:78139466-78153812	CR_Ileum	GF_Ileum	0.237226	0.0939228	-1.33671	0.819661	0.412409	1	no
Myl4	chr11:104411976-104448533	CR_Ileum	GF_Ileum	0.0433307	0.0171627	-1.33611	0.45775	0.647132	1	no
-	chr2:150850761-150851493	CR_Ileum	GF_Ileum	0.220757	0.08759	-1.33362	0.730824	0.464887	1	no
-	chr7:117778671-117781705	CR_Ileum	GF_Ileum	0.164785	0.0653908	-1.33343	1.14671	0.2515	1	no
-	chr3:107891072-107895222	CR_Ileum	GF_Ileum	0.321402	0.12759	-1.33286	1.42369	0.154536	0.573326	no
Grpr	chrX:159946185-159987588	CR_Ileum	GF_Ileum	0.295465	0.117437	-1.33111	1.5583	0.119162	0.494567	no
1110032F04Rik	chr3:68673507-68676085	CR_Ileum	GF_Ileum	0.174952	0.0695903	-1.33	1.14861	0.250716	1	no
Dyrk4	chr6:126826216-126871857	CR_Ileum	GF_Ileum	0.0524473	0.0208955	-1.32768	0.75377	0.450987	1	no
Adssl1	chr12:113858257-113879566	CR_Ileum	GF_Ileum	0.0374546	0.0149227	-1.32763	0.589522	0.555511	1	no
Ank1	chr8:24085353-24260968	CR_Ileum	GF_Ileum	0.00756652	0.00301559	-1.32719	0.312943	0.754324	1	no
-	chr3:101269653-101271300	CR_Ileum	GF_Ileum	0.319583	0.127537	-1.32527	1.21208	0.225482	0.697234	no
Eya2	chr2:165480797-165597131	CR_Ileum	GF_Ileum	0.0826848	0.0329976	-1.32526	0.832283	0.405249	1	no
-	chr12:60113387-60114151	CR_Ileum	GF_Ileum	0.207352	0.082752	-1.32522	0.738457	0.460237	1	no
Scrn1	chr6:54458809-54516376	CR_Ileum	GF_Ileum	0.173007	0.0690854	-1.32438	1.00517	0.314816	1	no
Mmp28	chr11:83251195-83276558	CR_Ileum	GF_Ileum	0.693596	0.277234	-1.32299	1.38269	0.166758	0.596892	no
L1td1	chr4:98393444-98405177	CR_Ileum	GF_Ileum	0.0108597	0.00434676	-1.32097	0.454287	0.649622	1	no
6330403A02Rik	chr1:182362503-182413635	CR_Ileum	GF_Ileum	0.0046981	0.00188087	-1.32068	0.451521	0.651614	1	no
-	chr7:151164287-151611945	CR_Ileum	GF_Ileum	0.343909	0.137744	-1.32004	0.174374	0.861572	0.999999	no
-	chr3:101729103-101730032	CR_Ileum	GF_Ileum	0.0803288	0.0322042	-1.31867	0.587702	0.556732	1	no
Hmox1	chr8:77617516-77624492	CR_Ileum	GF_Ileum	0.593019	0.237997	-1.31713	1.38092	0.167303	0.597959	no
A830093I24Rik	chr12:4753021-4776073	CR_Ileum	GF_Ileum	0.0110462	0.00443687	-1.31593	0.445506	0.655954	1	no
Bai2	chr4:129662321-129699877	CR_Ileum	GF_Ileum	0.120121	0.0482664	-1.3154	0.88392	0.37674	1	no
Sphk1	chr11:116393224-116397989	CR_Ileum	GF_Ileum	0.262186	0.105371	-1.31511	0.860569	0.389475	0.882669	no
-	chr6:28160909-28213778	CR_Ileum	GF_Ileum	0.141982	0.0570732	-1.31482	0.151527	0.87956	1	no
Lrrtm3	chr10:62892845-64466415	CR_Ileum	GF_Ileum	0.00811971	0.00326821	-1.31293	0.254051	0.799456	1	no
Fscn1	chr5:143722033-143734868	CR_Ileum	GF_Ileum	0.0361574	0.0145554	-1.31274	0.745802	0.455787	1	no
-	chr12:114496921-114668015	CR_Ileum	GF_Ileum	8.63905	3.48358	-1.3103	1.71543	0.0862655	0.408986	no
Sox15	chr11:69468538-69476144	CR_Ileum	GF_Ileum	0.0600536	0.0242255	-1.30972	0.0609946	0.951363	1	no
D14Ertd668e	chr14:59966127-59984332	CR_Ileum	GF_Ileum	0.328384	0.132585	-1.30847	0.95846	0.337831	0.835916	no
-	chr6:86544797-86545785	CR_Ileum	GF_Ileum	0.349861	0.141397	-1.30704	1.02152	0.307009	0.802359	no
Lrrn3	chr12:41750676-43056573	CR_Ileum	GF_Ileum	0.0395194	0.0159789	-1.3064	0.192302	0.847506	1	no
Plcb2	chr2:118530702-118554350	CR_Ileum	GF_Ileum	2.17775	0.881003	-1.30562	1.89918	0.0575405	0.316996	no
Sema4f	chr6:82861878-82889744	CR_Ileum	GF_Ileum	0.0241998	0.0097922	-1.30529	0.629513	0.529013	1	no
-	chr9:76330244-76331259	CR_Ileum	GF_Ileum	0.159842	0.0646851	-1.30514	0.802552	0.422234	1	no
Defb1	chr8:22887026-22905657	CR_Ileum	GF_Ileum	0.676223	0.273833	-1.3042	0.988882	0.322721	0.819825	no
-	chr2:24223009-24264249	CR_Ileum	GF_Ileum	0.0946644	0.0383346	-1.30418	0.0896407	0.928573	1	no
-	chr3:40690834-40692900	CR_Ileum	GF_Ileum	0.165596	0.0670942	-1.3034	1.04267	0.297101	1	no
-	chr10:77066994-77068738	CR_Ileum	GF_Ileum	0.0379047	0.0153725	-1.30202	0.579973	0.561933	1	no
-	chr1:186691681-186693288	CR_Ileum	GF_Ileum	0.198521	0.080536	-1.30159	1.00526	0.314774	1	no
Snord17	chr2:144075858-144096638	CR_Ileum	GF_Ileum	6.25412	2.53723	-1.30155	0.124432	0.900973	0.999999	no
Wfikkn2	chr11:94097265-94109227	CR_Ileum	GF_Ileum	0.147519	0.059935	-1.29944	1.0822	0.279165	1	no
Dynlt1f	chr17:6806387-6812617	CR_Ileum	GF_Ileum	0.0812593	0.0330147	-1.29942	0.292273	0.770078	1	no
Qpct	chr17:79451245-79489583	CR_Ileum	GF_Ileum	0.646448	0.262659	-1.29934	1.41389	0.157395	0.578904	no
Dcx	chrX:140290384-140367762	CR_Ileum	GF_Ileum	0.00335669	0.00136387	-1.29934	0.112183	0.910678	1	no
Irs2	chr8:10984678-11009259	CR_Ileum	GF_Ileum	11.7458	4.77307	-1.29916	2.62785	0.00859265	0.0823852	no
H2-Q6	chr17:35561821-35565957	CR_Ileum	GF_Ileum	2.96222	1.2045	-1.29824	1.37644	0.168685	0.600612	no
P2rx7	chr5:123093919-123141441	CR_Ileum	GF_Ileum	0.743145	0.302424	-1.29707	1.28865	0.19752	0.652656	no
Timm8a2	chr14:122433895-122437644	CR_Ileum	GF_Ileum	0.040323	0.0164107	-1.29696	0.441268	0.659019	1	no
Srms	chr2:180940267-180947876	CR_Ileum	GF_Ileum	0.0882145	0.0359177	-1.29632	0.93922	0.347618	1	no
Kcnrg	chr14:62217062-62301298	CR_Ileum	GF_Ileum	0.314762	0.128308	-1.29465	0.31662	0.751532	0.999999	no
Emr4	chr17:55889248-55992927	CR_Ileum	GF_Ileum	0.00889121	0.00362501	-1.2944	0.441733	0.658682	1	no
Adamts10	chr17:33661140-33690727	CR_Ileum	GF_Ileum	0.248681	0.101457	-1.29343	1.12045	0.262524	1	no
Ttyh1	chr7:4025726-4088528	CR_Ileum	GF_Ileum	1.07268	0.437932	-1.29243	1.7572	0.0788843	0.386847	no
1700008O03Rik	chr7:51615414-51630400	CR_Ileum	GF_Ileum	0.0786692	0.0321306	-1.29185	0.603216	0.546365	1	no
Fezf1	chr6:23195046-23198264	CR_Ileum	GF_Ileum	0.093263	0.0380977	-1.2916	0.858877	0.390409	1	no
-	chr16:4681976-4682923	CR_Ileum	GF_Ileum	0.0952271	0.0389118	-1.29116	0.600561	0.548132	1	no
Col5a2	chr1:45431175-45560127	CR_Ileum	GF_Ileum	0.013674	0.00559171	-1.29008	0.625444	0.53168	1	no
Sox8	chr17:25702837-25707631	CR_Ileum	GF_Ileum	0.0208186	0.00851745	-1.28938	0.560649	0.575037	1	no
4933417A18Rik	chr13:35016277-35055678	CR_Ileum	GF_Ileum	0.136513	0.0558787	-1.28867	0.107353	0.914509	1	no
Ccdc46	chr11:108286579-108721929	CR_Ileum	GF_Ileum	0.151972	0.0622854	-1.28684	0.625678	0.531526	1	no
-	chr2:164340743-164342759	CR_Ileum	GF_Ileum	0.144657	0.0593044	-1.28643	1.00927	0.312843	1	no
Tnfsf14	chr17:57328914-57333609	CR_Ileum	GF_Ileum	0.0873856	0.0358559	-1.28518	0.757719	0.448619	1	no
Gpr55	chr1:87834825-87857660	CR_Ileum	GF_Ileum	1.9428	0.797361	-1.28483	2.04276	0.0410765	0.253969	no
4930562C15Rik	chr16:4835415-4867691	CR_Ileum	GF_Ileum	0.00801242	0.0032888	-1.28468	0.439204	0.660514	1	no
Casr	chr16:36493781-36562220	CR_Ileum	GF_Ileum	0.0599312	0.0246153	-1.28376	0.97337	0.33037	1	no
Edn1	chr13:42396638-42403358	CR_Ileum	GF_Ileum	4.22293	1.73513	-1.2832	2.01014	0.0444164	0.267378	no
-	chr11:53004291-53005892	CR_Ileum	GF_Ileum	0.144045	0.059236	-1.28197	0.840651	0.400544	1	no
-	chr16:98266831-98267921	CR_Ileum	GF_Ileum	0.0643784	0.0264772	-1.28182	0.573051	0.56661	1	no
Dio1	chr4:106964069-106979748	CR_Ileum	GF_Ileum	50.8852	20.9284	-1.28178	2.62315	0.00871206	0.0832388	no
-	chr1:164802070-164802660	CR_Ileum	GF_Ileum	0.215662	0.0887054	-1.28168	0.65199	0.514407	1	no
Fkbp1b	chr12:4839979-4848401	CR_Ileum	GF_Ileum	0.149709	0.0616085	-1.28096	0.798317	0.424687	1	no
Miat	chr5:112642247-112657968	CR_Ileum	GF_Ileum	0.11797	0.0485949	-1.27954	1.38592	0.16577	1	no
Gem	chr4:11631593-11642140	CR_Ileum	GF_Ileum	0.211919	0.0873074	-1.27934	1.11979	0.262802	1	no
Cyp2c66	chr19:39188387-39261246	CR_Ileum	GF_Ileum	0.822771	0.339475	-1.27719	1.34043	0.180106	0.622438	no
Efhc1	chr1:20941706-20980922	CR_Ileum	GF_Ileum	0.0495996	0.0204819	-1.27598	0.738479	0.460223	1	no
Fam20c	chr5:139231034-139286017	CR_Ileum	GF_Ileum	0.17366	0.0717419	-1.27537	1.2205	0.222276	1	no
-	chr16:8883842-8884530	CR_Ileum	GF_Ileum	0.115227	0.0476233	-1.27474	0.529906	0.596177	1	no
-	chr1:78591519-78593479	CR_Ileum	GF_Ileum	0.0652889	0.0270044	-1.27364	0.696736	0.485968	1	no
Ffar1	chr7:31645586-31646489	CR_Ileum	GF_Ileum	0.539414	0.223261	-1.27266	1.11071	0.266692	0.754099	no
-	chr11:62839721-62840601	CR_Ileum	GF_Ileum	0.227408	0.0941742	-1.27188	0.818428	0.413113	1	no
Rab9b	chrX:133392689-133403079	CR_Ileum	GF_Ileum	0.00929968	0.0038516	-1.27172	0.464602	0.642217	1	no
Padi2	chr4:140462274-140508501	CR_Ileum	GF_Ileum	0.827858	0.343023	-1.27108	1.41027	0.158459	0.580797	no
Tgfb3	chr12:87397692-87419991	CR_Ileum	GF_Ileum	0.0926307	0.0384074	-1.27011	0.970007	0.332043	1	no
-	chr2:4801436-4802411	CR_Ileum	GF_Ileum	0.0731089	0.0303298	-1.26931	0.56207	0.574068	1	no
Rasl10a	chr11:4954133-4965849	CR_Ileum	GF_Ileum	0.0942387	0.0391191	-1.26845	0.0595619	0.952505	1	no
-	chr8:25598024-25599849	CR_Ileum	GF_Ileum	0.0703849	0.0292268	-1.26797	0.699413	0.484294	1	no
-	chr16:3861472-3884568	CR_Ileum	GF_Ileum	0.422503	0.175569	-1.26692	0.222226	0.824138	0.999999	no
-	chr10:39896838-39898475	CR_Ileum	GF_Ileum	0.218358	0.0907778	-1.26628	0.944957	0.344681	1	no
3110062M04Rik	chr6:34813145-34828296	CR_Ileum	GF_Ileum	1.81279	0.755342	-1.26301	1.01093	0.312052	0.807861	no
Pramel4	chr4:143649028-143659221	CR_Ileum	GF_Ileum	0.0131369	0.00547611	-1.26241	0.433378	0.66474	1	no
Cd79b	chr11:106172654-106175843	CR_Ileum	GF_Ileum	0.669734	0.279381	-1.26136	1.24776	0.212121	0.676583	no
Daf2	chr1:132285104-132319576	CR_Ileum	GF_Ileum	1.2943	0.540269	-1.26042	1.37818	0.168147	0.599653	no
-	chr17:36248181-36248642	CR_Ileum	GF_Ileum	11.7761	4.91638	-1.2602	1.48115	0.138567	0.539415	no
-	chr2:60044261-60122763	CR_Ileum	GF_Ileum	0.477925	0.199549	-1.26004	0.0192532	0.984639	0.999999	no
Kirrel2	chr7:31232784-31242534	CR_Ileum	GF_Ileum	0.0293177	0.0122412	-1.26003	0.639169	0.522713	1	no
Cyp3a57	chr5:146106138-146151381	CR_Ileum	GF_Ileum	1.56304	0.652707	-1.25985	1.38429	0.166271	0.595917	no
9930111J21Rik1,9930111J21Rik2	chr11:48759616-48792900	CR_Ileum	GF_Ileum	1.57699	0.658792	-1.25928	1.36647	0.171792	0.606572	no
-	chr12:21834163-21840400	CR_Ileum	GF_Ileum	0.672099	0.281253	-1.25681	1.19741	0.231148	0.706009	no
Hist1h2bb	chr13:23838602-23839070	CR_Ileum	GF_Ileum	0.202081	0.0845945	-1.2563	0.556218	0.578062	1	no
-	chr2:128514187-128524396	CR_Ileum	GF_Ileum	0.163705	0.0685699	-1.25545	0.430135	0.667097	1	no
Col1a2	chr6:4455696-4491543	CR_Ileum	GF_Ileum	0.0115406	0.00483449	-1.25529	0.558668	0.576388	1	no
Cldn4	chr5:135420992-135477220	CR_Ileum	GF_Ileum	98.7128	41.3696	-1.25466	0.800331	0.423519	0.908076	no
Tctex1d2	chr16:32419787-32429141	CR_Ileum	GF_Ileum	1.60547	0.672947	-1.25443	0.931658	0.351513	0.849394	no
-	chr5:17527670-17529765	CR_Ileum	GF_Ileum	0.511731	0.214536	-1.25417	1.27736	0.201477	0.659624	no
-	chr14:70760525-70761294	CR_Ileum	GF_Ileum	0.499055	0.209279	-1.25377	0.999366	0.317617	0.814066	no
Sarm1	chr11:78285831-78311256	CR_Ileum	GF_Ileum	0.011754	0.00493282	-1.25266	0.357606	0.720638	1	no
Lgals7	chr7:29649404-29651303	CR_Ileum	GF_Ileum	0.138486	0.0581331	-1.25231	0.549955	0.58235	1	no
-	chr2:58228837-58231648	CR_Ileum	GF_Ileum	0.251884	0.105753	-1.25207	1.21719	0.223531	1	no
Med12l	chr3:58810899-59148178	CR_Ileum	GF_Ileum	0.0206712	0.00868306	-1.25134	0.405966	0.684768	1	no
-	chr8:10003423-10006008	CR_Ileum	GF_Ileum	0.340904	0.14332	-1.25012	1.29826	0.194198	0.647172	no
Trpc7	chr13:56866700-56996949	CR_Ileum	GF_Ileum	0.0189077	0.00794913	-1.2501	0.520891	0.602443	1	no
Ptpn14	chr1:191552146-191700572	CR_Ileum	GF_Ileum	0.10216	0.0429534	-1.24999	1.38553	0.165889	1	no
1700001J11Rik	chr9:39858142-39860610	CR_Ileum	GF_Ileum	0.0864831	0.0363644	-1.24989	0.888389	0.374332	1	no
-	chr12:103950905-103952401	CR_Ileum	GF_Ileum	0.402875	0.169476	-1.24925	1.16982	0.242073	0.720681	no
Kirrel3	chr9:34296315-34847462	CR_Ileum	GF_Ileum	0.513389	0.215999	-1.24903	0.344066	0.730796	0.999999	no
Erv3	chr2:131679413-131685483	CR_Ileum	GF_Ileum	0.0043449	0.00182974	-1.24768	0.297091	0.766397	1	no
-	chr5:65438242-65439245	CR_Ileum	GF_Ileum	0.173614	0.0732302	-1.24537	0.728991	0.466007	1	no
Gm7173	chrX:76727906-76762624	CR_Ileum	GF_Ileum	0.0411696	0.0173674	-1.2452	0.613895	0.539285	1	no
-	chr4:88359671-88361447	CR_Ileum	GF_Ileum	0.187876	0.0792652	-1.24502	0.992299	0.321052	1	no
Wwc2	chr8:48911387-49075944	CR_Ileum	GF_Ileum	0.859214	0.362797	-1.24386	1.5683	0.116812	0.488843	no
Pltp	chr2:164656229-164683208	CR_Ileum	GF_Ileum	0.43091	0.182033	-1.24319	0.128503	0.897751	0.999999	no
-	chr2:60423301-60425071	CR_Ileum	GF_Ileum	0.646394	0.273265	-1.24211	1.35093	0.176717	0.615928	no
Wnt9a	chr11:59120431-59147054	CR_Ileum	GF_Ileum	0.382952	0.161941	-1.2417	1.42427	0.154368	0.573073	no
Tril	chr6:53765461-53770819	CR_Ileum	GF_Ileum	0.010954	0.00463357	-1.24127	0.541946	0.587856	1	no
Hoxa3,Hoxa5,Hoxa6,Hoxa7	chr6:52119060-52172148	CR_Ileum	GF_Ileum	0.442576	0.187285	-1.24069	0.861312	0.389066	0.882242	no
Rpl13a	chr7:52380932-52384162	CR_Ileum	GF_Ileum	905.672	383.775	-1.23873	0.0473729	0.962216	0.999999	no
1810030J14Rik	chr1:176260648-176263008	CR_Ileum	GF_Ileum	16.6443	7.05833	-1.23763	1.9126	0.0557992	0.310645	no
Setbp1	chr18:78947116-79306130	CR_Ileum	GF_Ileum	0.164114	0.0696347	-1.23682	1.45592	0.145415	1	no
-	chr7:51741439-51742377	CR_Ileum	GF_Ileum	0.149956	0.0636389	-1.23656	0.682265	0.495071	1	no
Bank1	chr3:135716327-135989010	CR_Ileum	GF_Ileum	0.0531318	0.0225542	-1.23618	0.798807	0.424402	1	no
Steap4	chr5:7960471-7982213	CR_Ileum	GF_Ileum	0.0191075	0.00811109	-1.23617	0.545631	0.585319	1	no
Vmn2r25	chr6:123772831-123803208	CR_Ileum	GF_Ileum	0.0253282	0.0107532	-1.23599	0.560254	0.575306	1	no
-	chr14:63174590-63227369	CR_Ileum	GF_Ileum	0.0356268	0.0151282	-1.23572	0.480138	0.631129	1	no
Spnb1	chr12:77634422-77811534	CR_Ileum	GF_Ileum	0.233458	0.099149	-1.23549	0.514622	0.606817	1	no
-	chr9:51094730-51095707	CR_Ileum	GF_Ileum	0.142389	0.0605065	-1.23467	0.679364	0.496907	1	no
-	chr9:51174455-51190552	CR_Ileum	GF_Ileum	1.08998	0.463271	-1.23437	1.00839	0.313265	0.809227	no
Clec4a1	chr6:122871865-122884637	CR_Ileum	GF_Ileum	0.738974	0.314105	-1.23428	1.31002	0.190188	0.640228	no
Adam28	chr14:69224083-69273899	CR_Ileum	GF_Ileum	0.0500511	0.0212785	-1.23401	0.754027	0.450833	1	no
Stbd1	chr5:93032076-93035605	CR_Ileum	GF_Ileum	0.0313154	0.0133147	-1.23385	0.544257	0.586265	1	no
Ebi3	chr17:56092045-56096445	CR_Ileum	GF_Ileum	0.0571137	0.0243029	-1.23271	0.549726	0.582507	1	no
1700011A15Rik	chr15:101261843-101524736	CR_Ileum	GF_Ileum	0.0784003	0.0333746	-1.23211	0.155264	0.876613	1	no
Atp1a3	chr7:25763187-25790914	CR_Ileum	GF_Ileum	0.0617877	0.0263578	-1.22909	0.926429	0.354223	1	no
Gata1	chrX:7536385-7544941	CR_Ileum	GF_Ileum	0.0172976	0.00738778	-1.22736	0.405143	0.685373	1	no
Obox3	chr7:16210654-16225126	CR_Ileum	GF_Ileum	0.100484	0.0429177	-1.22733	0.730448	0.465117	1	no
-	chr9:98419755-98423622	CR_Ileum	GF_Ileum	0.533556	0.228089	-1.22604	1.20157	0.229531	0.703615	no
-	chr13:74699899-74701360	CR_Ileum	GF_Ileum	0.26415	0.112923	-1.22602	1.03039	0.302828	0.797224	no
-	chr12:52844393-52933803	CR_Ileum	GF_Ileum	0.141905	0.0607017	-1.22511	0.0104308	0.991678	1	no
Gm1337	chr2:118524838-118529699	CR_Ileum	GF_Ileum	0.0747641	0.0319848	-1.22496	0.974363	0.329877	1	no
-	chr8:22364336-22365040	CR_Ileum	GF_Ileum	0.638851	0.27358	-1.22352	1.00146	0.316603	0.812932	no
Cr2	chr1:196963004-197002909	CR_Ileum	GF_Ileum	0.0232301	0.00995088	-1.2231	0.717186	0.473259	1	no
B3galt5	chr16:96457407-96541465	CR_Ileum	GF_Ileum	0.290639	0.124506	-1.22302	0.945146	0.344584	0.842727	no
-	chr5:147008798-147010509	CR_Ileum	GF_Ileum	0.137832	0.0590681	-1.22246	0.888832	0.374093	1	no
-	chr8:22359728-22360918	CR_Ileum	GF_Ileum	0.583191	0.250204	-1.22086	1.17584	0.23966	0.717482	no
-	chr1:166505142-166510195	CR_Ileum	GF_Ileum	0.028691	0.0123097	-1.22081	0.723655	0.469277	1	no
Cyb5r2	chr7:114738564-114901546	CR_Ileum	GF_Ileum	0.0329219	0.0141477	-1.21849	0.091534	0.927068	1	no
Robo3	chr9:37223629-37240760	CR_Ileum	GF_Ileum	0.0245615	0.0105568	-1.21822	0.662293	0.507783	1	no
Cnr1	chr4:34011606-34035806	CR_Ileum	GF_Ileum	0.0306854	0.0132063	-1.21633	0.818467	0.413091	1	no
Tmem140	chr6:34813145-34828296	CR_Ileum	GF_Ileum	11.9531	5.14861	-1.21513	1.8989	0.0575782	0.317116	no
-	chr3:144447541-144512280	CR_Ileum	GF_Ileum	0.222879	0.0960498	-1.21441	0.0270665	0.978407	1	no
-	chr16:29807649-29808778	CR_Ileum	GF_Ileum	0.0588895	0.0253838	-1.2141	0.532361	0.594476	1	no
Pax6os1	chr2:105376236-105744664	CR_Ileum	GF_Ileum	0.0869414	0.0374761	-1.21407	0.172088	0.863368	1	no
Nfasc	chr1:134461266-134638374	CR_Ileum	GF_Ileum	0.310008	0.133785	-1.21239	1.30058	0.193403	0.645764	no
S100z	chr13:96247147-96249020	CR_Ileum	GF_Ileum	0.716764	0.309412	-1.21197	0.862911	0.388187	0.881355	no
-	chr6:72455635-72471847	CR_Ileum	GF_Ileum	27.8754	12.0343	-1.21184	1.63778	0.101468	0.451744	no
Hist1h4h	chr13:23622912-23714427	CR_Ileum	GF_Ileum	0.657358	0.283883	-1.21138	0.131607	0.895295	0.999999	no
Adh6a	chr3:137976249-137994098	CR_Ileum	GF_Ileum	18.1184	7.82971	-1.21043	2.27311	0.0230194	0.16969	no
Pnmal1	chr7:17545143-17547669	CR_Ileum	GF_Ileum	0.110764	0.0478672	-1.21038	0.748594	0.454102	1	no
Nckap5l	chr15:99252464-99288179	CR_Ileum	GF_Ileum	0.0837812	0.0362217	-1.20977	1.11318	0.265632	1	no
Ccl20	chr1:83113340-83115742	CR_Ileum	GF_Ileum	1.26249	0.545944	-1.20945	0.811212	0.417244	0.903504	no
Gda	chr19:21465796-21547151	CR_Ileum	GF_Ileum	126.173	54.6129	-1.20809	1.87467	0.0608379	0.32829	no
4930534B04Rik	chr12:92236907-92786285	CR_Ileum	GF_Ileum	0.292284	0.126514	-1.20807	0.461419	0.644498	0.999999	no
Ms4a4b	chr19:11518047-11538038	CR_Ileum	GF_Ileum	0.42675	0.184763	-1.20771	1.03548	0.300443	0.794668	no
Vmn2r26	chr6:123974775-124023123	CR_Ileum	GF_Ileum	1.38321	0.598888	-1.20766	0.886066	0.375582	0.870896	no
H2-M2	chr17:37617795-37620474	CR_Ileum	GF_Ileum	0.24854	0.107674	-1.2068	0.919217	0.357982	1	no
Tnip3	chr6:65527069-65601410	CR_Ileum	GF_Ileum	0.0235566	0.0102161	-1.20528	0.1649	0.869023	1	no
-	chr1:60882247-60885173	CR_Ileum	GF_Ileum	0.276027	0.119747	-1.20482	0.846176	0.397455	0.888806	no
St3gal2	chr8:113443764-113497224	CR_Ileum	GF_Ileum	0.282554	0.122597	-1.2046	1.35966	0.173938	0.610233	no
Nkain3	chr4:20170999-20705815	CR_Ileum	GF_Ileum	0.0149314	0.00647961	-1.20437	0.47519	0.634651	1	no
-	chr4:55553468-55554537	CR_Ileum	GF_Ileum	0.296144	0.128563	-1.20382	0.929152	0.35281	0.85043	no
8030462N17Rik	chr18:77870226-77952769	CR_Ileum	GF_Ileum	1.50048	0.651966	-1.20256	0.239332	0.810848	0.999999	no
-	chr6:22394909-22395638	CR_Ileum	GF_Ileum	0.499811	0.217294	-1.20174	0.942656	0.345857	0.844011	no
-	chr17:17096956-17099698	CR_Ileum	GF_Ileum	0.207553	0.0902462	-1.20154	1.11738	0.263832	1	no
Wdr76	chr2:121316362-121370595	CR_Ileum	GF_Ileum	0.0829361	0.0360728	-1.20109	0.0177962	0.985801	1	no
Tmem151b	chr17:45660382-45686626	CR_Ileum	GF_Ileum	0.0358217	0.0155866	-1.20053	0.835725	0.403309	1	no
-	chr1:194717436-194719414	CR_Ileum	GF_Ileum	0.192377	0.0837396	-1.19995	0.978488	0.327833	1	no
-	chr2:73651113-73652427	CR_Ileum	GF_Ileum	0.231688	0.100871	-1.19968	0.921519	0.356779	1	no
-	chr11:79854989-79857349	CR_Ileum	GF_Ileum	0.165362	0.0720365	-1.19883	1.0325	0.301836	1	no
2610528E23Rik	chr16:57302112-57606982	CR_Ileum	GF_Ileum	1670.4	728.577	-1.19704	0.024051	0.980812	0.999999	no
Mir5109	chr5:17282566-17282653	CR_Ileum	GF_Ileum	4991.12	2177.95	-1.19639	1.01376	0.310699	0.806423	no
-	chr6:120881496-121031627	CR_Ileum	GF_Ileum	0.360409	0.157315	-1.19598	0.306442	0.759268	0.999999	no
Icos	chr1:61034757-61057164	CR_Ileum	GF_Ileum	0.0178848	0.00780983	-1.19537	0.500374	0.616812	1	no
Mr1	chr1:156975007-156993910	CR_Ileum	GF_Ileum	0.0468048	0.020454	-1.19427	0.689156	0.490725	1	no
Capn3	chr2:120181044-120330711	CR_Ileum	GF_Ileum	0.512755	0.224085	-1.19422	0.0440104	0.964896	0.999999	no
C920021L13Rik	chr3:95666574-95695853	CR_Ileum	GF_Ileum	0.0533615	0.023328	-1.19373	0.0829245	0.933912	1	no
Sipa1	chr19:5651184-5663942	CR_Ileum	GF_Ileum	0.0653686	0.02859	-1.19309	0.658513	0.510209	1	no
-	chr2:143739778-143740860	CR_Ileum	GF_Ileum	0.15267	0.0667832	-1.19286	0.702575	0.482321	1	no
-	chr18:13107790-13107856	CR_Ileum	GF_Ileum	1309.87	573.279	-1.19211	0.400552	0.68875	0.999999	no
Ly6g6c	chr17:35204269-35206993	CR_Ileum	GF_Ileum	0.176582	0.0772914	-1.19196	0.708619	0.478561	1	no
-	chr10:8623760-8642894	CR_Ileum	GF_Ileum	0.292889	0.128201	-1.19195	0.362125	0.717258	0.999999	no
Art2a-ps	chr7:108698444-108709715	CR_Ileum	GF_Ileum	0.574306	0.25146	-1.19149	0.538686	0.590104	0.992909	no
Olfm1	chr2:28048612-28086256	CR_Ileum	GF_Ileum	0.424451	0.185854	-1.19143	0.847069	0.396957	0.888407	no
Slc4a8	chr15:100592177-100654402	CR_Ileum	GF_Ileum	0.403281	0.176594	-1.19135	1.56827	0.116818	0.488843	no
-	chr4:129488493-129489550	CR_Ileum	GF_Ileum	0.943873	0.413357	-1.1912	0.806295	0.420073	0.905503	no
Ffar3	chr7:31639331-31641197	CR_Ileum	GF_Ileum	2.8848	1.26412	-1.19034	1.6352	0.102007	0.453204	no
-	chr15:85869497-85870542	CR_Ileum	GF_Ileum	0.0953668	0.0417931	-1.19022	0.587637	0.556776	1	no
-	chr9:115233038-115234629	CR_Ileum	GF_Ileum	0.0489718	0.021466	-1.1899	0.569658	0.56891	1	no
Tcp11l1	chr2:104520136-104552319	CR_Ileum	GF_Ileum	0.0373941	0.0163924	-1.18978	0.751804	0.452169	1	no
N28178	chr4:42930122-42954479	CR_Ileum	GF_Ileum	0.00851746	0.00373574	-1.18903	0.404818	0.685611	1	no
Bag1	chr4:40867088-40895327	CR_Ileum	GF_Ileum	9.05132	3.9705	-1.18881	0.605863	0.544606	0.973773	no
Sult4a1	chr15:83906526-83936184	CR_Ileum	GF_Ileum	0.0749104	0.0328755	-1.18815	0.81853	0.413054	1	no
Tmem151a	chr19:5079336-5085477	CR_Ileum	GF_Ileum	0.505683	0.222091	-1.18708	1.45921	0.144508	0.552137	no
Entpd1	chr19:40734283-40816092	CR_Ileum	GF_Ileum	0.0887312	0.0389897	-1.18635	0.964522	0.334784	1	no
-	chr7:4397526-4398179	CR_Ileum	GF_Ileum	0.140726	0.0618654	-1.18569	0.56358	0.57304	1	no
Tmem27	chrX:160528118-160556791	CR_Ileum	GF_Ileum	0.363942	0.159998	-1.18565	0.988203	0.323053	0.820258	no
-	chr3:7690575-7691143	CR_Ileum	GF_Ileum	0.071102	0.0312651	-1.18534	0.397768	0.690801	1	no
Il1a	chr2:129123105-129135708	CR_Ileum	GF_Ileum	0.0553902	0.0243746	-1.18425	0.347615	0.728129	1	no
-	chr6:121092272-121093327	CR_Ileum	GF_Ileum	0.155489	0.068489	-1.18287	0.673937	0.500351	1	no
Nrip3	chr7:116901569-116925059	CR_Ileum	GF_Ileum	0.791964	0.348943	-1.18244	1.55132	0.120826	0.49838	no
Dlgap3	chr4:126846514-126914266	CR_Ileum	GF_Ileum	0.223623	0.098613	-1.18122	1.21594	0.224008	1	no
Pip4k2a	chr2:18763882-18919748	CR_Ileum	GF_Ileum	0.343469	0.151477	-1.18108	1.31409	0.188815	0.637662	no
Gm4952	chr19:12674473-12702106	CR_Ileum	GF_Ileum	0.350687	0.154675	-1.18094	0.822532	0.410774	0.898636	no
Fgd1	chrX:147481445-147531086	CR_Ileum	GF_Ileum	0.388441	0.171396	-1.18036	0.628008	0.529999	0.967294	no
4930513N10Rik	chr8:98243350-98345628	CR_Ileum	GF_Ileum	0.10113	0.044623	-1.18035	0.0057976	0.995374	1	no
Vmn2r97	chr17:19051285-19085035	CR_Ileum	GF_Ileum	0.0113098	0.00499117	-1.18012	0.398474	0.690281	1	no
-	chr12:14139978-14141594	CR_Ileum	GF_Ileum	0.199515	0.0880806	-1.1796	0.937276	0.348617	1	no
Myoz2	chr3:122709123-122737905	CR_Ileum	GF_Ileum	0.0560203	0.0247546	-1.17825	0.520022	0.603048	1	no
Apc2	chr10:79764564-79783293	CR_Ileum	GF_Ileum	0.00579283	0.00256245	-1.17674	0.068954	0.945026	1	no
Ankmy1	chr1:94766705-94799483	CR_Ileum	GF_Ileum	0.0198239	0.00877686	-1.17546	0.550589	0.581915	1	no
2310014L17Rik	chr7:13512764-13516421	CR_Ileum	GF_Ileum	0.274684	0.121621	-1.17538	1.22458	0.220732	0.68967	no
Crlf1	chr8:73017054-73027980	CR_Ileum	GF_Ileum	0.16067	0.0711826	-1.1745	0.933323	0.350653	1	no
Klf10	chr15:38224167-38230476	CR_Ileum	GF_Ileum	12.8728	5.70566	-1.17386	2.17533	0.0296056	0.202735	no
Gramd1a	chr7:31915142-31936185	CR_Ileum	GF_Ileum	1.95496	0.867924	-1.1715	1.43192	0.152166	0.568653	no
-	chr6:121098632-121100583	CR_Ileum	GF_Ileum	0.177101	0.0786295	-1.17143	0.968108	0.332991	1	no
Clec2i	chr6:128837631-128846866	CR_Ileum	GF_Ileum	0.249458	0.110774	-1.17118	0.731816	0.464281	1	no
-	chr2:83508704-83511678	CR_Ileum	GF_Ileum	0.251518	0.111719	-1.17078	1.08525	0.277812	1	no
Clu	chr14:66587319-66600382	CR_Ileum	GF_Ileum	2.05787	0.914511	-1.17008	1.31306	0.189162	0.638339	no
Gpr116	chr17:43526414-43596506	CR_Ileum	GF_Ileum	0.0548862	0.0244007	-1.16952	0.969674	0.332209	1	no
Cngb1	chr8:97762942-97830485	CR_Ileum	GF_Ileum	0.0675078	0.0300184	-1.16921	0.989354	0.32249	1	no
Hist1h1a	chr13:23855536-23856283	CR_Ileum	GF_Ileum	0.192952	0.0858221	-1.16882	0.668909	0.503553	1	no
Atf7ip2	chr16:10192998-10243144	CR_Ileum	GF_Ileum	0.362501	0.161238	-1.1688	1.11229	0.266013	0.753331	no
Ubash3b	chr9:40820774-40965710	CR_Ileum	GF_Ileum	0.449749	0.200168	-1.16791	0.808734	0.418668	0.904432	no
-	chr6:117837857-117838577	CR_Ileum	GF_Ileum	0.100587	0.0447767	-1.16763	0.515375	0.606291	1	no
-	chr4:137771449-137772434	CR_Ileum	GF_Ileum	0.45332	0.201819	-1.16747	0.972341	0.330881	0.828624	no
-	chr14:8587781-8624443	CR_Ileum	GF_Ileum	0.0733695	0.032673	-1.16708	0.274042	0.784052	1	no
-	chr17:6429259-6460353	CR_Ileum	GF_Ileum	0.591497	0.263499	-1.16658	0	1	1	no
-	chr4:55738007-55738766	CR_Ileum	GF_Ileum	0.161262	0.0718458	-1.16643	0.660254	0.509091	1	no
Pou2f3	chr9:42916735-43013838	CR_Ileum	GF_Ileum	3.86779	1.7235	-1.16617	1.43569	0.151089	0.566327	no
-	chr15:96671482-96675582	CR_Ileum	GF_Ileum	0.0164243	0.00732457	-1.16501	0.394497	0.693214	1	no
Armcx2	chrX:131338680-131343760	CR_Ileum	GF_Ileum	0.0187858	0.00838383	-1.16396	0.326247	0.744238	1	no
AF251705	chr11:114858082-114863194	CR_Ileum	GF_Ileum	0.0562742	0.0251178	-1.16377	0.512812	0.608083	1	no
-	chr5:146830079-146924859	CR_Ileum	GF_Ileum	0.312025	0.139273	-1.16374	0.965413	0.334338	0.832193	no
Olfr10	chr11:49131049-49131985	CR_Ileum	GF_Ileum	0.00608203	0.00271563	-1.16327	0.161208	0.871929	1	no
Usp27x	chrX:6949716-6952956	CR_Ileum	GF_Ileum	0.142224	0.0635252	-1.16277	1.05548	0.291204	1	no
Gm5934	chrX:24051433-24077886	CR_Ileum	GF_Ileum	0.0521481	0.0232931	-1.16271	0.663022	0.507317	1	no
-	chr17:48734606-48736386	CR_Ileum	GF_Ileum	0.117651	0.0525897	-1.16166	0.75079	0.452779	1	no
Ogdhl	chr14:33135204-33166464	CR_Ileum	GF_Ileum	1.03555	0.463182	-1.16074	1.33252	0.182688	0.626972	no
Ifrd1	chr12:40929715-40949780	CR_Ileum	GF_Ileum	38.7109	17.335	-1.15905	2.17943	0.0292998	0.201356	no
Trim69	chr2:121945843-122011925	CR_Ileum	GF_Ileum	0.292767	0.13112	-1.15887	0.0323149	0.974221	0.999999	no
Rhov	chr2:119094936-119096962	CR_Ileum	GF_Ileum	4.81589	2.15688	-1.15886	1.86128	0.0627051	0.334616	no
-	chr5:108540360-108541156	CR_Ileum	GF_Ileum	0.151027	0.0676463	-1.15872	0.650649	0.515273	1	no
-	chr10:74326158-74326258	CR_Ileum	GF_Ileum	3665.89	1642	-1.15871	1.42066	0.155417	0.574987	no
Mybpc2	chr7:51757068-51780039	CR_Ileum	GF_Ileum	0.05417	0.0242662	-1.15855	0.845157	0.398023	1	no
Uchl1	chr5:67067359-67078473	CR_Ileum	GF_Ileum	0.14008	0.0627631	-1.15827	0.771844	0.440207	1	no
-	chr11:121589983-121590904	CR_Ileum	GF_Ileum	0.307534	0.137848	-1.15767	0.852139	0.394137	0.886569	no
Slc23a1	chr18:35758289-35786881	CR_Ileum	GF_Ileum	1.90008	0.852046	-1.15706	0.454178	0.6497	0.999999	no
Gna14	chr19:16510156-16685308	CR_Ileum	GF_Ileum	0.263035	0.117968	-1.15686	1.16188	0.245286	0.725559	no
Tspan18	chr2:93041916-93174644	CR_Ileum	GF_Ileum	0.0149851	0.00672146	-1.15668	0.509563	0.610357	1	no
Casp12	chr9:5345475-5373034	CR_Ileum	GF_Ileum	0.354805	0.159173	-1.15643	1.03307	0.301573	0.795877	no
Gpr110	chr17:43407295-43463538	CR_Ileum	GF_Ileum	0.0511609	0.0229639	-1.15567	0.668645	0.503722	1	no
-	chr11:105938834-105939737	CR_Ileum	GF_Ileum	0.223	0.100109	-1.15547	0.713057	0.475811	1	no
Bcl7a	chr5:123792562-123824092	CR_Ileum	GF_Ileum	0.0765616	0.0343741	-1.1553	0.134858	0.892724	1	no
Shroom4	chrX:5977262-6210835	CR_Ileum	GF_Ileum	0.0649727	0.0291767	-1.15501	0.891082	0.372885	1	no
-	chrX:54170897-54174626	CR_Ileum	GF_Ileum	0.233724	0.10501	-1.15428	0.877953	0.379969	1	no
Snai1	chr2:167363726-167368311	CR_Ileum	GF_Ileum	0.0380622	0.0171057	-1.15388	0.509016	0.610741	1	no
-	chr4:128779629-128780945	CR_Ileum	GF_Ileum	0.259263	0.116534	-1.15366	0.860639	0.389437	0.882657	no
-	chr4:131736726-131738156	CR_Ileum	GF_Ileum	0.160794	0.0722878	-1.15339	0.836302	0.402985	1	no
Osm	chr11:4136787-4141029	CR_Ileum	GF_Ileum	0.0154713	0.00695884	-1.15268	0.385459	0.699897	1	no
Slfn10-ps	chr11:82841629-82854035	CR_Ileum	GF_Ileum	0.206391	0.0928643	-1.15219	1.08389	0.278412	1	no
Galnt13	chr2:54288797-54970155	CR_Ileum	GF_Ileum	0.00785602	0.00353485	-1.15215	0.502714	0.615165	1	no
-	chr10:82260844-82261575	CR_Ileum	GF_Ileum	0.167468	0.0753876	-1.15149	0.612635	0.540118	1	no
Itgb6	chr2:60436346-60560660	CR_Ileum	GF_Ileum	11.4159	5.1405	-1.15107	1.86612	0.0620251	0.332337	no
-	chr6:86447874-86448710	CR_Ileum	GF_Ileum	0.122583	0.0552035	-1.15092	0.5709	0.568067	1	no
Fam49a	chr12:12268944-12383167	CR_Ileum	GF_Ileum	1.59018	0.716976	-1.14919	1.55758	0.119334	0.495018	no
Plekhg3	chr12:77634422-77811534	CR_Ileum	GF_Ileum	0.198958	0.0897453	-1.14856	0.125579	0.900065	1	no
Ets1	chr9:32503626-32565405	CR_Ileum	GF_Ileum	1.85678	0.837621	-1.14843	1.74718	0.0806067	0.392054	no
Hsd17b6	chr10:127427986-127444703	CR_Ileum	GF_Ileum	4.16828	1.88041	-1.1484	1.32622	0.184766	0.630712	no
Gnat3	chr5:17468351-17527250	CR_Ileum	GF_Ileum	2.84078	1.28196	-1.14793	1.19716	0.231246	0.706064	no
-	chr2:30336883-30338237	CR_Ileum	GF_Ileum	0.102354	0.0461999	-1.14761	0.719545	0.471805	1	no
Psd2	chr18:36124488-36174369	CR_Ileum	GF_Ileum	0.0559141	0.0252388	-1.14757	0.897317	0.36955	1	no
Pgm2l1	chr7:107376116-107427382	CR_Ileum	GF_Ileum	1.64943	0.74503	-1.1466	1.27838	0.201116	0.659	no
-	chr2:58231962-58233952	CR_Ileum	GF_Ileum	0.192803	0.0871105	-1.14621	0.956264	0.338939	1	no
-	chr2:36111974-36114093	CR_Ileum	GF_Ileum	0.483332	0.2185	-1.14538	1.15231	0.249195	0.730997	no
-	chr17:35495929-35496575	CR_Ileum	GF_Ileum	0.989707	0.447596	-1.14481	1.06417	0.287253	0.780162	no
Fermt2	chr14:46078466-46149740	CR_Ileum	GF_Ileum	0.0173223	0.00783792	-1.14409	0.506406	0.612572	1	no
-	chr5:149777853-149778773	CR_Ileum	GF_Ileum	0.0359684	0.0162992	-1.14193	0.381866	0.702561	1	no
-	chr11:76903416-77273723	CR_Ileum	GF_Ileum	0.141815	0.0642696	-1.1418	0.113406	0.909708	1	no
Zfp677	chr17:21520709-21536230	CR_Ileum	GF_Ileum	1.33394	0.604802	-1.14116	1.27424	0.202579	0.661348	no
Fam154b	chr7:89781469-89797038	CR_Ileum	GF_Ileum	0.051152	0.0231977	-1.14081	0.550861	0.581729	1	no
-	chr3:28040742-28041465	CR_Ileum	GF_Ileum	0.147047	0.0667908	-1.13856	0.55645	0.577903	1	no
I830012O16Rik	chr19:34682446-34687891	CR_Ileum	GF_Ileum	0.964363	0.438498	-1.13701	1.37738	0.168394	0.600072	no
-	chr7:120321853-120457822	CR_Ileum	GF_Ileum	0.228913	0.104143	-1.13623	0.083744	0.93326	1	no
-	chr19:34954297-34955220	CR_Ileum	GF_Ileum	0.0881874	0.0401272	-1.13599	0.540579	0.588798	1	no
-	chr4:10892813-10901321	CR_Ileum	GF_Ileum	0.284376	0.129464	-1.13525	0.960849	0.336628	0.834661	no
-	chr17:22866212-22868216	CR_Ileum	GF_Ileum	0.137873	0.0627838	-1.13488	0.871997	0.38321	1	no
Egln3	chr12:55279967-55304861	CR_Ileum	GF_Ileum	60.109	27.3894	-1.13396	1.46041	0.144178	0.55159	no
Glce	chr9:61905053-61970545	CR_Ileum	GF_Ileum	13.9111	6.3445	-1.13266	1.91701	0.0552362	0.308696	no
Gpx7	chr4:108063981-108080894	CR_Ileum	GF_Ileum	2.96629	1.35331	-1.13217	1.01289	0.311114	0.806832	no
-	chr3:95454116-95455167	CR_Ileum	GF_Ileum	0.0909605	0.0415037	-1.132	0.560837	0.574909	1	no
Ank2	chr3:126624524-126701370	CR_Ileum	GF_Ileum	0.125015	0.0570764	-1.13114	1.04689	0.295149	1	no
Gm14391,Gm6710	chr2:175594788-176850107	CR_Ileum	GF_Ileum	0.467659	0.213517	-1.1311	0.319612	0.749263	0.999999	no
-	chr5:53408212-53409044	CR_Ileum	GF_Ileum	0.0811027	0.0370297	-1.13107	0.496528	0.619522	1	no
Slfn5	chr11:82765603-82778352	CR_Ileum	GF_Ileum	0.420941	0.192252	-1.13062	1.43139	0.152317	0.568891	no
Renbp	chrX:71167459-71176189	CR_Ileum	GF_Ileum	1.94865	0.890017	-1.13057	1.20688	0.227477	0.700384	no
-	chr3:96377306-96379437	CR_Ileum	GF_Ileum	0.209252	0.0956514	-1.12938	0.959149	0.337484	1	no
Trim38	chr13:23871118-23883596	CR_Ileum	GF_Ileum	4.91209	2.24646	-1.12869	1.67998	0.0929603	0.428001	no
Pla2g7	chr17:43705399-43749150	CR_Ileum	GF_Ileum	0.261372	0.119653	-1.12725	0.98322	0.325499	0.822809	no
-	chr16:48388677-48391266	CR_Ileum	GF_Ileum	0.569752	0.260835	-1.12719	1.28559	0.198587	0.654574	no
Tnc	chr4:63620818-63708049	CR_Ileum	GF_Ileum	0.0825026	0.037777	-1.12693	0.979511	0.327327	1	no
Fam19a1	chr6:96063147-96607191	CR_Ileum	GF_Ileum	0.0341796	0.0156512	-1.12686	0.57912	0.562508	1	no
-	chr9:70630706-70632321	CR_Ileum	GF_Ileum	0.109663	0.0502768	-1.12511	0.70232	0.48248	1	no
-	chr7:113472902-113473715	CR_Ileum	GF_Ileum	1.17176	0.537479	-1.1244	1.15338	0.248753	0.730553	no
Cd101	chr3:100796816-100833460	CR_Ileum	GF_Ileum	0.335494	0.153964	-1.12369	1.1195	0.262929	0.749391	no
Hist1h2ao	chr13:21902235-21902749	CR_Ileum	GF_Ileum	0.158577	0.0727776	-1.12362	0.492351	0.622471	1	no
Hist1h2ao	chr13:21924930-21925444	CR_Ileum	GF_Ileum	0.158577	0.0727776	-1.12362	0.492351	0.622471	1	no
-	chr19:56854017-56858991	CR_Ileum	GF_Ileum	0.353193	0.162142	-1.1232	1.35707	0.174759	0.61194	no
Skil	chr3:30993698-31021499	CR_Ileum	GF_Ileum	22.5554	10.3673	-1.12143	2.11879	0.0341079	0.223493	no
Akr1d1	chr6:37480172-37518815	CR_Ileum	GF_Ileum	0.0453446	0.0208937	-1.11786	0.64902	0.516325	1	no
Lpin1	chr12:16542323-16596577	CR_Ileum	GF_Ileum	2.52619	1.16428	-1.11753	1.63132	0.102823	0.455375	no
-	chr9:7925031-7925981	CR_Ileum	GF_Ileum	0.169885	0.0783013	-1.11745	0.661472	0.50831	1	no
Cd37	chr7:52471122-52494209	CR_Ileum	GF_Ileum	1.48231	0.683412	-1.11702	0.888758	0.374133	0.869536	no
Ncam2	chr16:81200941-81624532	CR_Ileum	GF_Ileum	0.11869	0.0547235	-1.11697	0.791366	0.42873	1	no
Ptprb	chr10:115738429-115826594	CR_Ileum	GF_Ileum	0.129151	0.059554	-1.11679	1.14301	0.253033	1	no
-	chr14:58689338-58731657	CR_Ileum	GF_Ileum	0.326478	0.150566	-1.11659	0.333713	0.738596	0.999999	no
1700119H24Rik	chr16:34785035-35002813	CR_Ileum	GF_Ileum	3.40618	1.5717	-1.11583	0.01814	0.985527	0.999999	no
Hist1h2bg	chr13:23622912-23714427	CR_Ileum	GF_Ileum	0.756647	0.349153	-1.11576	0.317438	0.750911	0.999999	no
E230025N22Rik	chr18:36844234-36855753	CR_Ileum	GF_Ileum	0.115185	0.0532505	-1.11309	0.597233	0.550352	1	no
Serpina10	chr12:104854884-104869615	CR_Ileum	GF_Ileum	0.127911	0.0591784	-1.11199	0.731888	0.464237	1	no
Spag4	chr2:155890948-155895235	CR_Ileum	GF_Ileum	0.0372785	0.017248	-1.11192	0.522176	0.601548	1	no
Pcyt1a	chr16:32431006-32475151	CR_Ileum	GF_Ileum	36.7487	17.0195	-1.1105	2.12509	0.0335788	0.221054	no
Rbpms	chr8:34891024-35040313	CR_Ileum	GF_Ileum	0.650721	0.301468	-1.11003	0.685688	0.49291	0.949052	no
-	chr16:48371083-48373367	CR_Ileum	GF_Ileum	0.1971	0.0913468	-1.1095	0.89524	0.370659	1	no
-	chr4:95156047-95156856	CR_Ileum	GF_Ileum	0.0414106	0.0191969	-1.10913	0.374925	0.707717	1	no
Havcr2	chr11:46268432-46294756	CR_Ileum	GF_Ileum	0.0989999	0.0459467	-1.10747	0.836203	0.403041	1	no
Foxb1	chr9:69605516-69608747	CR_Ileum	GF_Ileum	0.00922274	0.00428475	-1.10598	0.368095	0.712803	1	no
Vmn2r92	chr17:18288893-18322142	CR_Ileum	GF_Ileum	0.0107533	0.00499742	-1.10553	0.367975	0.712892	1	no
Klhl32	chr4:24544419-24778233	CR_Ileum	GF_Ileum	0.0122589	0.00570083	-1.10459	0.160392	0.872572	1	no
Ebf1	chr11:44431635-44818674	CR_Ileum	GF_Ileum	0.0125075	0.00581724	-1.10439	0.367595	0.713175	1	no
Gpx2-ps1	chr7:107376116-107427382	CR_Ileum	GF_Ileum	25.4418	11.856	-1.10158	1.659	0.0971151	0.439649	no
-	chr15:102999718-103000542	CR_Ileum	GF_Ileum	0.497394	0.231801	-1.1015	0.879418	0.379175	0.873644	no
-	chr18:30674433-30703451	CR_Ileum	GF_Ileum	0.194534	0.0907524	-1.10002	0.289249	0.772391	1	no
Zfp819	chr7:50834955-50873649	CR_Ileum	GF_Ileum	0.0115333	0.00538108	-1.09983	0.0905571	0.927845	1	no
Bcl6	chr16:23965137-23988698	CR_Ileum	GF_Ileum	4.88322	2.28039	-1.09855	2.00131	0.0453595	0.271301	no
Fam129a	chr1:153418502-153569085	CR_Ileum	GF_Ileum	0.724917	0.338539	-1.09849	1.42022	0.155544	0.575249	no
Chst3	chr10:59644275-59682008	CR_Ileum	GF_Ileum	0.0492561	0.0230035	-1.09845	0.896307	0.370089	1	no
Azgp1	chr5:138422748-138431460	CR_Ileum	GF_Ileum	0.0227209	0.0106128	-1.09821	0.362512	0.71697	1	no
-	chr14:49148583-49149609	CR_Ileum	GF_Ileum	0.0609948	0.0284913	-1.09817	0.470072	0.638304	1	no
Nuak1	chr10:83833738-83903216	CR_Ileum	GF_Ileum	0.483624	0.225946	-1.09791	0.763204	0.445342	0.923025	no
Gpr137b	chr13:13448191-13485898	CR_Ileum	GF_Ileum	0.31742	0.148334	-1.09754	0.79828	0.424708	0.908949	no
Siglech	chr7:63023547-63034203	CR_Ileum	GF_Ileum	0.230427	0.107711	-1.09714	0.994535	0.319962	1	no
Tbkbp1	chr11:96997484-97011026	CR_Ileum	GF_Ileum	0.0307734	0.0143853	-1.09708	0.626862	0.53075	1	no
-	chr13:58101886-58103089	CR_Ileum	GF_Ileum	0.125746	0.058848	-1.09545	0.635636	0.525013	1	no
-	chr2:147769750-147866268	CR_Ileum	GF_Ileum	0.0252953	0.0118394	-1.09528	0.136743	0.891234	1	no
-	chr13:100981572-101222880	CR_Ileum	GF_Ileum	0.326232	0.152716	-1.09505	0.0177358	0.98585	0.999999	no
-	chr5:106255105-106258924	CR_Ileum	GF_Ileum	0.234579	0.109846	-1.09459	1.09113	0.275216	1	no
Ctrb1	chr8:114210409-114214910	CR_Ileum	GF_Ileum	0.0364362	0.017065	-1.09433	0.370484	0.711022	1	no
Grhl3	chr4:135097802-135129535	CR_Ileum	GF_Ileum	0.0823419	0.0385703	-1.09414	0.814637	0.41528	1	no
Sh2d3c	chr2:32576585-32610514	CR_Ileum	GF_Ileum	0.679719	0.31859	-1.09324	1.00402	0.315367	0.811656	no
Msrb3	chr10:120218156-120336027	CR_Ileum	GF_Ileum	0.0145135	0.00680349	-1.09305	0.41237	0.680068	1	no
Irgm2	chr11:58028445-58036285	CR_Ileum	GF_Ileum	4.73969	2.22333	-1.09207	1.73553	0.0826465	0.398212	no
-	chr14:100019355-100020222	CR_Ileum	GF_Ileum	0.0748795	0.0351303	-1.09185	0.46737	0.640235	1	no
-	chr9:72378732-72379753	CR_Ileum	GF_Ileum	0.167397	0.0785565	-1.09147	0.729708	0.465569	1	no
Plcd3	chr11:102931609-102962972	CR_Ileum	GF_Ileum	0.0807395	0.0378976	-1.09117	0.765923	0.443722	1	no
H2-Eb2	chr17:34462619-34478355	CR_Ileum	GF_Ileum	0.0329856	0.0154844	-1.09102	0.617654	0.536803	1	no
-	chr9:31272201-31272703	CR_Ileum	GF_Ileum	0.349066	0.163952	-1.09023	0.678209	0.497639	0.951497	no
Gm684	chr9:51078362-51092923	CR_Ileum	GF_Ileum	0.643539	0.302267	-1.0902	0.985445	0.324406	0.821493	no
Ptpn5	chr7:54333169-54389054	CR_Ileum	GF_Ileum	0.0960931	0.0451402	-1.09002	0.770358	0.441087	1	no
Tshz3	chr7:37483136-37558476	CR_Ileum	GF_Ileum	0.0186611	0.00876624	-1.09	0.613672	0.539432	1	no
Ceacam10	chr7:25562222-25569674	CR_Ileum	GF_Ileum	3.96177	1.8618	-1.08945	1.50644	0.131955	0.524676	no
Gm13238	chr4:145427121-145427895	CR_Ileum	GF_Ileum	0.506925	0.238305	-1.08896	0.903962	0.366016	0.862152	no
Gpr151	chr18:42737673-42739306	CR_Ileum	GF_Ileum	0.0528058	0.024826	-1.08885	0.544635	0.586004	1	no
Acyp2	chr11:30405991-30549426	CR_Ileum	GF_Ileum	3.87029	1.81963	-1.0888	0.719018	0.47213	0.939501	no
Ifitm3	chr7:148195488-148196643	CR_Ileum	GF_Ileum	8.88229	4.17649	-1.08864	1.53685	0.124329	0.507021	no
-	chr15:58074365-58084935	CR_Ileum	GF_Ileum	0.0320713	0.015084	-1.08827	0.206718	0.83623	1	no
-	chr6:136741365-136742227	CR_Ileum	GF_Ileum	0.225716	0.106169	-1.08814	0.679746	0.496665	1	no
Cidec	chr6:113374605-113385749	CR_Ileum	GF_Ileum	19.1098	8.991	-1.08775	2.0073	0.0447181	0.268612	no
-	chr13:76002331-76003254	CR_Ileum	GF_Ileum	0.0345013	0.0162329	-1.08773	0.366892	0.7137	1	no
Svopl	chr6:37933738-37996996	CR_Ileum	GF_Ileum	0.0233509	0.0109891	-1.0874	0.47996	0.631256	1	no
-	chr7:136935324-136936495	CR_Ileum	GF_Ileum	0.15492	0.0729086	-1.08736	0.651985	0.514411	1	no
Kalrn	chr16:33969158-34514113	CR_Ileum	GF_Ileum	42.2264	19.8846	-1.08649	1.52615	0.126971	0.513479	no
Susd3	chr13:49326201-49343532	CR_Ileum	GF_Ileum	0.37897	0.178465	-1.08644	0.958132	0.337996	0.836053	no
Fzd10	chr5:129085004-129109968	CR_Ileum	GF_Ileum	0.0983418	0.0463189	-1.0862	0.873813	0.38222	1	no
Dcn	chr10:96942133-96980796	CR_Ileum	GF_Ileum	0.0948266	0.0446845	-1.08552	0.540467	0.588875	1	no
-	chr15:100995823-100997077	CR_Ileum	GF_Ileum	0.118864	0.0560414	-1.08475	0.63828	0.523291	1	no
Gm826	chr2:160137136-160183138	CR_Ileum	GF_Ileum	0.46975	0.221601	-1.08393	0.974571	0.329773	0.827425	no
-	chr15:101241353-101242463	CR_Ileum	GF_Ileum	0.347106	0.163755	-1.08384	0.888293	0.374383	0.869797	no
-	chr13:38690846-38691174	CR_Ileum	GF_Ileum	0.17529	0.0827089	-1.08363	0.367692	0.713103	1	no
Ramp3	chr11:6550150-6577478	CR_Ileum	GF_Ileum	0.0490009	0.0231304	-1.08302	0.411989	0.680347	1	no
Arhgap9	chr10:126758945-126778635	CR_Ileum	GF_Ileum	1.76868	0.835326	-1.08226	1.02445	0.305624	0.800674	no
-	chr8:10932033-10935408	CR_Ileum	GF_Ileum	0.100584	0.0475066	-1.08219	0.872505	0.382933	1	no
-	chr15:58341563-58497730	CR_Ileum	GF_Ileum	0.726878	0.343446	-1.08163	0.130868	0.89588	0.999999	no
Paqr8	chr1:20880637-20929736	CR_Ileum	GF_Ileum	1.08747	0.513866	-1.08151	1.38749	0.165294	0.594027	no
Slc1a2	chr2:102498839-102630941	CR_Ileum	GF_Ileum	0.0843015	0.039838	-1.08141	0.611982	0.54055	1	no
Fbxo32	chr15:58007433-58046447	CR_Ileum	GF_Ileum	4.26128	2.01403	-1.0812	2.10539	0.0352575	0.228659	no
Runx1	chr16:92601710-92831425	CR_Ileum	GF_Ileum	0.856405	0.404799	-1.08109	1.16712	0.243163	0.722297	no
Bmp8b	chr4:122782014-122817188	CR_Ileum	GF_Ileum	2.62484	1.24184	-1.07975	1.11069	0.266702	0.754108	no
-	chr11:48678750-48687614	CR_Ileum	GF_Ileum	0.12485	0.0590949	-1.07909	0.143024	0.886271	1	no
-	chr9:7209033-7210765	CR_Ileum	GF_Ileum	0.106742	0.0505262	-1.07903	0.7363	0.461548	1	no
Ngfr	chr11:95430139-95449012	CR_Ileum	GF_Ileum	0.00787131	0.00372644	-1.0788	0.363883	0.715946	1	no
-	chr5:93433028-93437971	CR_Ileum	GF_Ileum	0.139343	0.0659785	-1.07857	0.372881	0.709237	1	no
-	chr6:131245890-131303793	CR_Ileum	GF_Ileum	2.04305	0.967501	-1.07839	0.194217	0.846006	0.999999	no
1600029D21Rik	chr9:50296903-50319398	CR_Ileum	GF_Ileum	0.20213	0.0957669	-1.07769	0.826546	0.408495	1	no
Gm4956	chr1:21275326-21288393	CR_Ileum	GF_Ileum	0.129017	0.0611359	-1.07746	0.670954	0.50225	1	no
-	chr3:135092469-135093736	CR_Ileum	GF_Ileum	0.151922	0.072	-1.07726	0.757893	0.448515	1	no
-	chr9:7719703-7722649	CR_Ileum	GF_Ileum	2.32908	1.10509	-1.07559	1.68771	0.0914671	0.423797	no
-	chr1:139121874-139122649	CR_Ileum	GF_Ileum	0.190207	0.09025	-1.07557	0.664112	0.506618	1	no
-	chr6:121102924-121105352	CR_Ileum	GF_Ileum	0.30054	0.142606	-1.07553	1.0921	0.274791	0.764551	no
Lat	chr7:133507341-133513062	CR_Ileum	GF_Ileum	1.37101	0.650564	-1.07548	1.1047	0.269289	0.757592	no
Nxf7	chrX:132114109-132133233	CR_Ileum	GF_Ileum	2.74653	1.30399	-1.07468	1.34814	0.177612	0.617752	no
-	chr5:75389874-75390615	CR_Ileum	GF_Ileum	0.181404	0.0861731	-1.0739	0.583651	0.559455	1	no
Slc4a11	chr2:130509843-130523255	CR_Ileum	GF_Ileum	0.476331	0.226299	-1.07373	1.25227	0.210471	0.673781	no
Fbxo10	chr4:45047119-45097476	CR_Ileum	GF_Ileum	0.0919807	0.043702	-1.07363	0.977643	0.328251	1	no
-	chr18:21264616-21270195	CR_Ileum	GF_Ileum	1.16228	0.5528	-1.07213	0.686418	0.492449	0.948814	no
-	chr19:4626339-4627747	CR_Ileum	GF_Ileum	0.102935	0.0489867	-1.07127	0.633192	0.526609	1	no
A630095N17Rik	chr1:75216009-75228668	CR_Ileum	GF_Ileum	0.190954	0.0908795	-1.07119	0.739044	0.45988	1	no
1300014I06Rik	chr13:34719709-34744966	CR_Ileum	GF_Ileum	14.5201	6.91056	-1.07118	1.7684	0.0769945	0.380868	no
Tmem59l	chr8:73007769-73011257	CR_Ileum	GF_Ileum	0.019337	0.00920303	-1.07118	0.349852	0.72645	1	no
-	chr5:44621838-44622399	CR_Ileum	GF_Ileum	0.334403	0.159233	-1.07045	0.629612	0.528948	0.966772	no
-	chr11:69188089-69188472	CR_Ileum	GF_Ileum	0.126529	0.0602688	-1.06999	0.361561	0.71768	1	no
Hist1h1e,Hist1h2be,Hist1h2bf	chr13:23622912-23714427	CR_Ileum	GF_Ileum	1.19039	0.567011	-1.06999	0.444688	0.656545	0.999999	no
Cdkn1c	chr7:150644243-150647175	CR_Ileum	GF_Ileum	5.03792	2.40065	-1.0694	1.44895	0.14735	0.558308	no
Samd14	chr11:94871192-94887401	CR_Ileum	GF_Ileum	1.64321	0.783208	-1.06905	1.58261	0.113511	0.48084	no
-	chr3:95663770-95664558	CR_Ileum	GF_Ileum	0.185368	0.0883585	-1.06895	0.664238	0.506538	1	no
Esr1	chr10:5340925-5734679	CR_Ileum	GF_Ileum	0.320941	0.153071	-1.06811	0.940578	0.346921	0.845284	no
Rrh	chr3:129511492-129525423	CR_Ileum	GF_Ileum	0.0207777	0.00991075	-1.06797	0.35874	0.71979	1	no
St3gal6	chr16:58408647-58524840	CR_Ileum	GF_Ileum	14.8127	7.06732	-1.0676	1.48087	0.138642	0.539553	no
Emid1	chr11:5006268-5052225	CR_Ileum	GF_Ileum	0.291393	0.139033	-1.06754	0.980951	0.326617	0.824074	no
Irx4	chr13:73397944-73407068	CR_Ileum	GF_Ileum	0.114977	0.0548752	-1.06712	0.158888	0.873757	1	no
5830416P10Rik	chr19:53515701-53539286	CR_Ileum	GF_Ileum	0.0685988	0.0327509	-1.06665	0.471158	0.637528	1	no
-	chr7:139791445-139792239	CR_Ileum	GF_Ileum	0.18323	0.0875119	-1.0661	0.671889	0.501655	1	no
Tyrobp	chr7:31198806-31202598	CR_Ileum	GF_Ileum	2.38304	1.13838	-1.06581	1.11355	0.265474	0.752689	no
Actn3	chr19:4861222-4877884	CR_Ileum	GF_Ileum	0.0187881	0.00897676	-1.06555	0.466852	0.640606	1	no
-	chr15:38324729-38326219	CR_Ileum	GF_Ileum	0.221712	0.105984	-1.06484	0.880299	0.378697	1	no
B3gnt5	chr16:19760321-19772963	CR_Ileum	GF_Ileum	0.363594	0.1739	-1.06407	0.858368	0.390689	0.883783	no
Dazl	chr17:50418718-50432924	CR_Ileum	GF_Ileum	0.0363533	0.0173871	-1.06407	0.579519	0.562239	1	no
Adam23	chr1:63492477-63643089	CR_Ileum	GF_Ileum	0.045376	0.021704	-1.06397	0.530101	0.596042	1	no
Gm5077	chr6:124574642-124586103	CR_Ileum	GF_Ileum	0.0101072	0.00483805	-1.06288	0.359072	0.719541	1	no
Cxcl10	chr5:92760866-92843653	CR_Ileum	GF_Ileum	0.852821	0.408413	-1.06221	0.401364	0.688152	0.999999	no
-	chrX:54211969-54213335	CR_Ileum	GF_Ileum	1.02337	0.490253	-1.06173	0.711185	0.47697	0.942119	no
Six3	chr17:86020173-86025531	CR_Ileum	GF_Ileum	0.0140914	0.006752	-1.06143	0.460445	0.645197	1	no
Fer1l4	chr2:155844875-155878683	CR_Ileum	GF_Ileum	0.145772	0.0698582	-1.06121	1.0912	0.275183	1	no
Myl7	chr11:5796639-5798785	CR_Ileum	GF_Ileum	6.32487	3.03315	-1.06022	1.44433	0.148646	0.561384	no
Klk1b11	chr7:51251248-51255245	CR_Ileum	GF_Ileum	0.037013	0.0177533	-1.05995	0.359057	0.719552	1	no
Lars2	chr9:123276057-123371782	CR_Ileum	GF_Ileum	2729.98	1309.45	-1.05992	0.138761	0.889639	0.999999	no
-	chr11:20717370-20721810	CR_Ileum	GF_Ileum	0.356852	0.171186	-1.05976	1.19966	0.230271	0.70469	no
Nod2	chr8:91171245-91212373	CR_Ileum	GF_Ileum	0.0929316	0.0445818	-1.05971	0.913525	0.360967	1	no
Gpsm1	chr2:26171052-26216523	CR_Ileum	GF_Ileum	0.633645	0.304102	-1.05912	0.124031	0.901291	0.999999	no
E130012A19Rik	chr11:97488700-97491031	CR_Ileum	GF_Ileum	1.85868	0.893194	-1.05723	1.35483	0.175471	0.613259	no
-	chr10:107756094-107756800	CR_Ileum	GF_Ileum	0.239131	0.114948	-1.05682	0.625547	0.531612	1	no
Lztfl1	chr9:123599297-123626696	CR_Ileum	GF_Ileum	0.0797224	0.0383465	-1.05589	0.168733	0.866007	1	no
Bdnf	chr2:109514856-109567200	CR_Ileum	GF_Ileum	0.0797224	0.0383482	-1.05583	0.776253	0.4376	1	no
Gpr22	chr12:32339733-32635400	CR_Ileum	GF_Ileum	0.155665	0.0749091	-1.05523	0.145084	0.884644	1	no
-	chr5:149798477-149799774	CR_Ileum	GF_Ileum	0.111893	0.053875	-1.05443	0.619204	0.535782	1	no
Akna	chr4:63028161-63064479	CR_Ileum	GF_Ileum	1.23376	0.594194	-1.05406	1.42564	0.153971	0.572346	no
-	chr10:114769221-114770123	CR_Ileum	GF_Ileum	0.138522	0.0668326	-1.0515	0.569326	0.569135	1	no
-	chr4:149151034-149152085	CR_Ileum	GF_Ileum	0.0573448	0.0276691	-1.05139	0.464635	0.642193	1	no
Shh	chr5:28783379-29046651	CR_Ileum	GF_Ileum	0.08457	0.0408246	-1.05071	0.527779	0.597653	1	no
-	chr11:118917840-118918561	CR_Ileum	GF_Ileum	0.15895	0.0767387	-1.05054	0.593028	0.553162	1	no
Col8a1	chr16:57624368-57754850	CR_Ileum	GF_Ileum	0.0559536	0.0270436	-1.04894	0.825243	0.409234	1	no
Kcnj11	chr7:53352492-53356134	CR_Ileum	GF_Ileum	0.290024	0.140247	-1.0482	0.784603	0.432686	0.914517	no
H2-Oa	chr17:34229323-34232179	CR_Ileum	GF_Ileum	0.117453	0.0567985	-1.04816	0.646067	0.518236	1	no
-	chr14:102128228-102128841	CR_Ileum	GF_Ileum	0.0578584	0.0279809	-1.04809	0.352736	0.724287	1	no
Itga4	chr2:79095582-79269145	CR_Ileum	GF_Ileum	0.436183	0.211169	-1.04653	1.45387	0.145981	0.555341	no
-	chr19:5897134-5924816	CR_Ileum	GF_Ileum	0.0797224	0.0386414	-1.04484	0.0351801	0.971936	1	no
Trim30a	chr7:111557539-111613793	CR_Ileum	GF_Ileum	1.67812	0.813859	-1.044	1.34384	0.178999	0.620425	no
-	chr7:148843284-148845168	CR_Ileum	GF_Ileum	0.0754896	0.0366163	-1.04379	0.605965	0.544538	1	no
-	chr13:100981572-101222880	CR_Ileum	GF_Ileum	0.252391	0.122442	-1.04357	0.00949635	0.992423	1	no
AA792892	chr5:94806364-94813359	CR_Ileum	GF_Ileum	0.125108	0.0607377	-1.04251	0.664995	0.506054	1	no
Ccrl1	chr9:103966032-104029976	CR_Ileum	GF_Ileum	1.06595	0.517673	-1.04202	0.238324	0.81163	0.999999	no
4931406H21Rik	chr14:26278389-26486356	CR_Ileum	GF_Ileum	0.0362974	0.0176366	-1.04129	0.0336192	0.973181	1	no
Col4a4	chr1:82447297-82583424	CR_Ileum	GF_Ileum	0.0064709	0.00314443	-1.04117	0.459799	0.645661	1	no
-	chr5:110211240-110508391	CR_Ileum	GF_Ileum	0.481034	0.233802	-1.04085	0.261063	0.794044	0.999999	no
Prss16	chr13:22094044-22101610	CR_Ileum	GF_Ileum	0.17894	0.087074	-1.03916	0.841782	0.39991	1	no
Aoah	chr13:20885987-21116121	CR_Ileum	GF_Ileum	0.096563	0.0470239	-1.03808	0.823638	0.410145	1	no
Hist1h1d	chr13:23622912-23714427	CR_Ileum	GF_Ileum	0.438993	0.213878	-1.03741	0.374996	0.707664	0.999999	no
C3	chr17:57343395-57367559	CR_Ileum	GF_Ileum	0.534906	0.260645	-1.0372	1.37869	0.16799	0.599297	no
-	chr15:100880624-100909332	CR_Ileum	GF_Ileum	0.104045	0.0507229	-1.03649	0.119782	0.904656	1	no
Gbgt1	chr2:28352389-28361648	CR_Ileum	GF_Ileum	0.473564	0.230887	-1.03637	1.08757	0.276783	0.767058	no
Nrp2	chr1:62749325-62865266	CR_Ileum	GF_Ileum	0.233223	0.113733	-1.03605	0.761212	0.44653	1	no
-	chr4:141906295-141907174	CR_Ileum	GF_Ileum	0.0353803	0.0172616	-1.03538	0.347651	0.728102	1	no
Ccnj	chr19:40905069-40923060	CR_Ileum	GF_Ileum	5.58271	2.72377	-1.03536	1.58892	0.112078	0.4774	no
Mical1	chr10:41196000-41206836	CR_Ileum	GF_Ileum	18.0832	8.82638	-1.03476	1.91339	0.0556979	0.310275	no
Zfp105	chr9:122832195-122840146	CR_Ileum	GF_Ileum	0.217118	0.106004	-1.03436	0.948895	0.342674	1	no
1700016K19Rik	chr11:75813413-75817071	CR_Ileum	GF_Ileum	0.0923789	0.045103	-1.03434	0.404636	0.685745	1	no
C230081A13Rik	chr9:56048935-56266014	CR_Ileum	GF_Ileum	364.287	177.931	-1.03375	0.240481	0.809957	0.999999	no
-	chr12:78032766-78033672	CR_Ileum	GF_Ileum	0.219977	0.107454	-1.03363	0.723407	0.46943	1	no
-	chr13:6028314-6073699	CR_Ileum	GF_Ileum	0.0763971	0.0373205	-1.03355	0.115811	0.907803	1	no
Oas3	chr5:121203106-121227668	CR_Ileum	GF_Ileum	9.88552	4.83228	-1.03261	1.91445	0.0555629	0.309764	no
-	chr17:66977356-66979778	CR_Ileum	GF_Ileum	0.0656053	0.0321422	-1.02934	0.638156	0.523372	1	no
Btbd17	chr11:114651982-114657206	CR_Ileum	GF_Ileum	0.0246775	0.0120905	-1.02933	0.482984	0.629107	1	no
-	chr14:18487453-18488844	CR_Ileum	GF_Ileum	0.121926	0.0598071	-1.02762	0.677978	0.497786	1	no
Plec	chr15:76001403-76061808	CR_Ileum	GF_Ileum	0.632374	0.310195	-1.0276	1.382	0.166972	0.597253	no
-	chr12:103954176-103955645	CR_Ileum	GF_Ileum	0.257578	0.126351	-1.02758	0.894	0.371322	1	no
-	chr8:26221631-26222594	CR_Ileum	GF_Ileum	0.0941317	0.0461961	-1.02691	0.516982	0.605169	1	no
Paqr3	chr5:97426590-97540615	CR_Ileum	GF_Ileum	0.181265	0.0889803	-1.02654	0.12621	0.899566	1	no
Kcnip2	chr19:45868159-45890293	CR_Ileum	GF_Ileum	0.0510057	0.025056	-1.0255	0.164427	0.869395	1	no
-	chr3:101273950-101275020	CR_Ileum	GF_Ileum	0.247828	0.121839	-1.02436	0.716814	0.473489	1	no
Tubb4	chr17:57219488-57227205	CR_Ileum	GF_Ileum	0.0990313	0.0486919	-1.0242	0.781207	0.43468	1	no
Trnp1	chr4:133047014-133054465	CR_Ileum	GF_Ileum	0.0497595	0.0244711	-1.02389	0.513178	0.607827	1	no
-	chr16:13819369-13952170	CR_Ileum	GF_Ileum	0.184303	0.0906967	-1.02295	0.0481412	0.961604	1	no
-	chr3:144733228-144816879	CR_Ileum	GF_Ileum	0.289888	0.142697	-1.02254	0.297269	0.766261	0.999999	no
-	chr16:98242592-98244035	CR_Ileum	GF_Ileum	0.0579833	0.0285745	-1.02091	0.510848	0.609457	1	no
-	chr17:22334194-22451789	CR_Ileum	GF_Ileum	0.267038	0.131609	-1.02079	0.0956837	0.923772	0.999999	no
Hist1h2bp	chr13:21879356-21881082	CR_Ileum	GF_Ileum	0.0593835	0.0292848	-1.01991	0.342479	0.73199	1	no
Zfp37	chr4:61850576-61869866	CR_Ileum	GF_Ileum	1.78925	0.882493	-1.01969	1.22107	0.222058	0.691552	no
Kcne2	chr16:92292633-92298378	CR_Ileum	GF_Ileum	0.0160972	0.00794087	-1.01944	0.337884	0.735451	1	no
Gcnt1	chr19:17400630-17447334	CR_Ileum	GF_Ileum	4.89701	2.41662	-1.01891	1.73342	0.0830218	0.399508	no
Clec4n	chr6:123179860-123197042	CR_Ileum	GF_Ileum	0.0506329	0.0250129	-1.0174	0.389731	0.696735	1	no
H2-Gs10	chr17:35516561-35521619	CR_Ileum	GF_Ileum	26.3868	13.0426	-1.01659	2.04631	0.0407256	0.252468	no
-	chr2:128633984-128634921	CR_Ileum	GF_Ileum	0.208455	0.103095	-1.01576	0.671363	0.501989	1	no
B230217C12Rik	chr11:97702093-97704357	CR_Ileum	GF_Ileum	0.0685625	0.0339299	-1.01486	0.484852	0.627781	1	no
Nphp4	chr4:151852250-151937293	CR_Ileum	GF_Ileum	0.0241074	0.0119374	-1.01399	0.662135	0.507885	1	no
Sectm1b	chr11:120914736-120924883	CR_Ileum	GF_Ileum	223.462	110.656	-1.01395	1.82365	0.0682053	0.352986	no
-	chr14:51525379-51526483	CR_Ileum	GF_Ileum	0.131612	0.065185	-1.01368	0.590566	0.554812	1	no
-	chr17:87863438-87864262	CR_Ileum	GF_Ileum	0.130791	0.0647807	-1.01362	0.575311	0.565081	1	no
Amotl1	chr9:14346410-14419665	CR_Ileum	GF_Ileum	0.188387	0.0933462	-1.01304	1.11515	0.264784	1	no
-	chr6:70672556-70676954	CR_Ileum	GF_Ileum	11.589	5.74385	-1.01267	1.00138	0.316642	0.81298	no
Xaf1	chr11:72115098-72127235	CR_Ileum	GF_Ileum	6.74008	3.3409	-1.01253	0.471565	0.637237	0.999999	no
Plxdc1	chr11:97784550-97847760	CR_Ileum	GF_Ileum	0.0537104	0.0266401	-1.0116	0.526271	0.5987	1	no
2310014H01Rik	chr17:36002539-36012541	CR_Ileum	GF_Ileum	1.18218	0.586416	-1.01145	1.12761	0.259484	0.744606	no
4930578N16Rik	chr2:69596113-69627543	CR_Ileum	GF_Ileum	0.120311	0.0596827	-1.01138	0.730406	0.465142	1	no
[truncated: 24,902 more rows]

## Sheet: CV vs. GF ileum
Table S3: Genes differentially expressed in the presence and absence of microbiota (CV vs. GF ileum).
gene	locus	sample_1	sample_2	value_1	value_2	log2.fold_change.	test_stat	p_value	q_value	significant
Neurl3	chr1:36320748-36338794	GF_Ileum	CV_Ileum	49.3965	3.75575	-3.71724	2.86403	0.00418284	0.0473881	yes
Des	chr1:75356918-75364290	GF_Ileum	CV_Ileum	1.467	0.331603	-2.14534	3.22726	0.00124982	0.0179251	yes
Akp3	chr1:89021571-89025274	GF_Ileum	CV_Ileum	3.7543	36.6418	3.28687	-3.3126	0.000924324	0.0140448	yes
Gm15455	chr1:33892743-33895759	GF_Ileum	CV_Ileum	2.45736	0.682596	-1.84801	3.22334	0.00126707	0.0181292	yes
Npl	chr1:155350145-155396870	GF_Ileum	CV_Ileum	0.677077	5.25984	2.95763	-3.88002	0.000104448	0.00222232	yes
Ralgps2	chr1:158734219-158872202	GF_Ileum	CV_Ileum	1.36145	13.5794	3.31821	-3.83583	0.000125141	0.00260156	yes
B020018G12Rik	chr1:177892436-178205443	GF_Ileum	CV_Ileum	2.0537	0.2502	-3.03707	3.81275	0.000137429	0.0028232	yes
Sgk1	chr10:21601989-21719710	GF_Ileum	CV_Ileum	19.8614	218.842	3.46185	-5.02866	4.94e-07	1.93e-05	yes
Psap	chr10:59740374-59765348	GF_Ileum	CV_Ileum	29.3737	143.305	2.28649	-4.42825	9.5e-06	0.000272118	yes
Ank3	chr10:68996455-69490184	GF_Ileum	CV_Ileum	2.35398	22.1703	3.23546	-5.82632	5.67e-09	3.24e-07	yes
Ptprr	chr10:115455418-115711991	GF_Ileum	CV_Ileum	1.28397	24.6526	4.26305	-4.04938	5.14e-05	0.00120027	yes
Tcf3	chr10:79871909-79896722	GF_Ileum	CV_Ileum	3.89318	16.7127	2.10193	-3.20794	0.00133689	0.0189499	yes
Btg1	chr10:96074628-96085445	GF_Ileum	CV_Ileum	64.4802	0	-1.79769e+308	-1.79769e+308	0.00120342	0.0173933	yes
Csl	chr10:99220338-99222292	GF_Ileum	CV_Ileum	14.9959	0.245618	-5.93201	9.4562	0	0	yes
Lyz2	chr10:116714596-116719328	GF_Ileum	CV_Ileum	32.6775	1.92416	-4.086	7.34723	2.02e-13	2.27e-11	yes
Gm12070	chr11:26685107-26687859	GF_Ileum	CV_Ileum	184.396	45.3676	-2.02308	4.62659	3.72e-06	0.000118642	yes
Rtn4	chr11:29592897-29926033	GF_Ileum	CV_Ileum	9.90897	36.6678	1.88771	-3.54687	0.000389836	0.00684434	yes
Spag9	chr11:93857400-93987396	GF_Ileum	CV_Ileum	0.910078	12.2473	3.75033	-6.5799	4.71e-11	3.72e-09	yes
Nkiras2	chr11:100484268-100512007	GF_Ileum	CV_Ileum	38.8887	7.61333	-2.35275	4.16558	3.11e-05	0.000775558	yes
Eif5a	chr11:69730213-69735460	GF_Ileum	CV_Ileum	39.4846	158.406	2.00426	-3.64146	0.000271099	0.00502885	yes
Ccl5	chr11:83339280-83344020	GF_Ileum	CV_Ileum	6.93589	23.5032	1.7607	-3.0269	0.00247074	0.0312918	yes
-	chr11:101519567-101520265	GF_Ileum	CV_Ileum	2.38617	0.198452	-3.58784	3.47008	0.000520298	0.00873643	yes
Gm6682	chr12:4788975-4790318	GF_Ileum	CV_Ileum	12.8484	3.48125	-1.88391	3.60158	0.000316286	0.00574041	yes
Wdr89	chr12:76731580-76770524	GF_Ileum	CV_Ileum	137.374	35.4137	-1.95573	4.33172	1.48e-05	0.000401956	yes
-	chr12:33396942-33397299	GF_Ileum	CV_Ileum	0	12.0391	1.79769e+308	1.79769e+308	7.13e-05	0.00159478	yes
Hist1h2bj	chr13:22135098-22135479	GF_Ileum	CV_Ileum	0	7.44397	1.79769e+308	1.79769e+308	0.0017912	0.0241413	yes
Rnf44	chr13:54780759-54795349	GF_Ileum	CV_Ileum	3.02737	32.0845	3.40574	-5.17351	2.3e-07	9.58e-06	yes
Gzma	chr13:113884034-113891189	GF_Ileum	CV_Ileum	5.8024	22.1155	1.93033	-3.56315	0.000366431	0.00649399	yes
-	chr13:91400895-91401333	GF_Ileum	CV_Ileum	20.9441	3.18547	-2.71697	4.32601	1.52e-05	0.000411503	yes
-	chr13:108204256-108204812	GF_Ileum	CV_Ileum	0	28.1866	1.79769e+308	1.79769e+308	3.73e-08	1.83e-06	yes
D14Ertd449e	chr14:26742783-26747158	GF_Ileum	CV_Ileum	6.2615	17.3472	1.47012	-3.02992	0.00244617	0.0310426	yes
D14Ertd449e	chr14:26845641-26985331	GF_Ileum	CV_Ileum	6.2615	17.365	1.4716	-2.99086	0.00278196	0.0343196	yes
D14Ertd449e	chr14:27022152-27026527	GF_Ileum	CV_Ileum	6.2615	17.4005	1.47455	-3.04379	0.00233617	0.0299047	yes
Gm5801	chr14:56629128-56630317	GF_Ileum	CV_Ileum	0.653052	19.8752	4.92763	-7.24785	4.23e-13	4.52e-11	yes
Gzmb	chr14:56877694-56881097	GF_Ileum	CV_Ileum	1.36124	6.22501	2.19315	-3.58471	0.000337449	0.00606062	yes
Gm5088	chr14:90296030-90299254	GF_Ileum	CV_Ileum	10.8285	0	-1.79769e+308	-1.79769e+308	0.000615571	0.0100616	yes
-	chr14:43800320-43800705	GF_Ileum	CV_Ileum	0	5.32554	1.79769e+308	1.79769e+308	0.00029433	0.00539482	yes
Ly6e	chr15:74785474-74798604	GF_Ileum	CV_Ileum	1.18312	9.81015	3.05168	-4.09846	4.16e-05	0.00100007	yes
Eppk1	chr15:75931895-75956986	GF_Ileum	CV_Ileum	25.6305	0	-1.79769e+308	-1.79769e+308	0.000567724	0.00941393	yes
Gm5803	chr15:22643574-22644739	GF_Ileum	CV_Ileum	0.567927	7.53182	3.72922	-5.0927	3.53e-07	1.42e-05	yes
Plec	chr15:76001403-76061808	GF_Ileum	CV_Ileum	0.310195	64.7246	7.70499	-11.0156	0	0	yes
BC002163	chr16:42955692-42956192	GF_Ileum	CV_Ileum	54.8288	14.3721	-1.93166	3.77478	0.000160149	0.00321502	yes
Abi3bp	chr16:56477958-56690354	GF_Ileum	CV_Ileum	0.333765	5.54252	4.05364	-4.79086	1.66e-06	5.77e-05	yes
Filip1l	chr16:57302112-57606982	GF_Ileum	CV_Ileum	3492.45	185.059	-4.23818	5.0251	5.03e-07	1.96e-05	yes
Tmprss15	chr16:78953708-79091342	GF_Ileum	CV_Ileum	0.0440601	0.559977	3.66782	-2.85856	0.00425565	0.0480317	yes
App	chr16:84954670-85174004	GF_Ileum	CV_Ileum	42.4845	178.358	2.06976	-3.52405	0.000425003	0.00735653	yes
-	chr16:91534716-91534992	GF_Ileum	CV_Ileum	8.00707	0.792769	-3.3363	2.86362	0.00418832	0.0474285	yes
Dynlt1e	chr17:6600795-6610127	GF_Ileum	CV_Ileum	0.528754	11.5554	4.44982	-5.26442	1.41e-07	6.14e-06	yes
Tmem181c-ps	chr17:6635807-6644102	GF_Ileum	CV_Ileum	0.896531	6.21193	2.79262	-4.40799	1.04e-05	0.000295387	yes
Hmga1	chr17:27693218-27700617	GF_Ileum	CV_Ileum	1.23792	30.2535	4.61111	-4.94589	7.58e-07	2.85e-05	yes
Lbh	chr17:73267644-73291286	GF_Ileum	CV_Ileum	11.0965	4.39738	-1.33539	2.86418	0.00418084	0.0473797	yes
Dynlt1e	chr17:6648832-6655064	GF_Ileum	CV_Ileum	0.340382	7.8338	4.52448	-4.6799	2.87e-06	9.41e-05	yes
Tmem181d-ps	chr17:6817348-6825643	GF_Ileum	CV_Ileum	0.602377	6.39139	3.40739	-5.04083	4.64e-07	1.82e-05	yes
Dynlt1e	chr17:6851323-6860656	GF_Ileum	CV_Ileum	0.50641	5.73318	3.50096	-3.89978	9.63e-05	0.0020696	yes
Ntn3,Tbc1d24	chr17:24306746-24346332	GF_Ileum	CV_Ileum	0.360212	8.79524	4.6098	-6.8504	7.36e-12	6.51e-10	yes
Cyp4f14	chr17:33031225-33084337	GF_Ileum	CV_Ileum	74.4119	734.67	3.30349	-3.43944	0.00058292	0.00962353	yes
Hspa1a	chr17:35106303-35109101	GF_Ileum	CV_Ileum	5.15301	1.01072	-2.35003	3.86124	0.000112813	0.00237641	yes
Vegfa	chr17:46153939-46169394	GF_Ileum	CV_Ileum	12.7415	43.6	1.7748	-3.23784	0.00120437	0.0174036	yes
Tgif1	chr17:71193543-71202872	GF_Ileum	CV_Ileum	2.90889	13.0116	2.16126	-3.26906	0.00107906	0.0159349	yes
Eif2ak2	chr17:79249844-79281940	GF_Ileum	CV_Ileum	40.5562	13.8597	-1.54903	2.90758	0.00364231	0.0424888	yes
-	chr17:34674445-34674688	GF_Ileum	CV_Ileum	3.9691	27.0081	2.76651	-3.09598	0.00196165	0.0259494	yes
-	chr17:36368203-36368536	GF_Ileum	CV_Ileum	24.7635	2.83988	-3.12432	4.1913	2.77e-05	0.000701791	yes
-	chr17:39979939-39985779	GF_Ileum	CV_Ileum	1092.05	166.508	-2.71337	3.00702	0.00263818	0.0329152	yes
Bambi	chr18:3507954-3516402	GF_Ileum	CV_Ileum	1.5913	0.44737	-1.83067	3.08437	0.00203985	0.0267988	yes
Tcf7l2	chr19:55816225-56008305	GF_Ileum	CV_Ileum	1.10876	12.2431	3.46495	-5.1218	3.03e-07	1.23e-05	yes
Pnliprp2	chr19:58834212-58852024	GF_Ileum	CV_Ileum	76.8537	26.5809	-1.53173	3.58627	0.000335438	0.00602938	yes
Sipa1	chr19:5651184-5663942	GF_Ileum	CV_Ileum	0.02859	0.828925	4.85766	-3.02409	0.00249386	0.0315271	yes
Cyp2c67	chr19:39683348-39723532	GF_Ileum	CV_Ileum	3.57705	0.523598	-2.77224	3.76389	0.000167292	0.00333788	yes
Sorbs1	chr19:40366361-40588318	GF_Ileum	CV_Ileum	2.50596	14.849	2.56693	-3.888	0.000101073	0.00216025	yes
Gm13611	chr2:32127324-32127757	GF_Ileum	CV_Ileum	83.9559	14.1681	-2.56698	4.91699	8.79e-07	3.25e-05	yes
Dync1i2	chr2:71049762-71102462	GF_Ileum	CV_Ileum	12.3475	39.1593	1.66513	-3.23267	0.00122641	0.0176612	yes
Arhgap1	chr2:91482919-91514565	GF_Ileum	CV_Ileum	2.6648	36.0445	3.75768	-3.49372	0.000476338	0.00811236	yes
Casc4	chr2:121692705-121761995	GF_Ileum	CV_Ileum	0.265705	1.30925	2.30084	-3.20929	0.00133061	0.0188778	yes
Sema6d	chr2:124435166-124493737	GF_Ileum	CV_Ileum	0.48755	9.52278	4.28776	-5.02762	4.97e-07	1.94e-05	yes
Tpx2	chr2:152673699-152721057	GF_Ileum	CV_Ileum	0.19753	3.40345	4.10685	-3.91544	9.02e-05	0.00195709	yes
Myl9	chr2:156601199-156607393	GF_Ileum	CV_Ileum	1.99482	0.431317	-2.20944	2.97649	0.00291571	0.0355999	yes
1110008F13Rik	chr2:156688746-156712814	GF_Ileum	CV_Ileum	60.3934	19.9895	-1.59515	2.90025	0.00372864	0.0432753	yes
Pkig	chr2:163484121-163551894	GF_Ileum	CV_Ileum	7.51729	32.8299	2.12672	-3.44706	0.000566717	0.00939934	yes
Gnas	chr2:174106737-174172245	GF_Ileum	CV_Ileum	41.7031	200.345	2.26426	-4.62965	3.66e-06	0.000117122	yes
Gm14306,Gm14436	chr2:175295525-175308823	GF_Ileum	CV_Ileum	0.080351	3.34905	5.38129	-5.9384	2.88e-09	1.73e-07	yes
Gm14327	chr2:177631867-177662555	GF_Ileum	CV_Ileum	0.422829	2.6158	2.62911	-2.95908	0.00308556	0.0372378	yes
Arfgap1,Col20a1	chr2:180701572-180752599	GF_Ileum	CV_Ileum	3.53307	17.15	2.27921	-2.9239	0.00345676	0.0407285	yes
Rtel1	chr2:181054423-181091329	GF_Ileum	CV_Ileum	0.570982	2.7839	2.28559	-3.19222	0.00141183	0.019835	yes
Pfkfb3	chr2:11393039-11475556	GF_Ileum	CV_Ileum	0.036037	1.72076	5.57742	-3.53321	0.000410544	0.00714466	yes
Ctnnd1	chr2:84424711-84490922	GF_Ileum	CV_Ileum	13.5589	106.82	2.97787	-3.07931	0.00207482	0.0271826	yes
Cd44	chr2:102651298-102742004	GF_Ileum	CV_Ileum	0.268019	2.77482	3.37199	-3.89511	9.82e-05	0.00210598	yes
-	chr2:104660255-104661105	GF_Ileum	CV_Ileum	0	3.09322	1.79769e+308	1.79769e+308	5.59e-05	0.00129369	yes
-	chr2:118419986-118420404	GF_Ileum	CV_Ileum	0	6.26464	1.79769e+308	1.79769e+308	0.000152617	0.00308612	yes
Dclk1	chr3:55046445-55342990	GF_Ileum	CV_Ileum	0.562197	2.87314	2.35348	-3.7425	0.000182195	0.00358947	yes
Sprr2b	chr3:92120626-92122007	GF_Ileum	CV_Ileum	0.172114	93.8125	9.09027	-7.58454	3.33e-14	4.12e-12	yes
Pxmp3	chr3:5560089-5576867	GF_Ileum	CV_Ileum	3.35119	25.7811	2.94357	-3.94153	8.1e-05	0.00178067	yes
Car1	chr3:14766213-14808365	GF_Ileum	CV_Ileum	2.23141	20.371	3.19049	-4.99307	5.94e-07	2.29e-05	yes
Gm5148	chr3:37613111-37623282	GF_Ileum	CV_Ileum	103.388	17.9949	-2.52241	5.74691	9.09e-09	5.01e-07	yes
Pdlim5	chr3:141902548-142058660	GF_Ileum	CV_Ileum	6.46524	25.4541	1.97712	-3.75413	0.000173945	0.00345172	yes
Rabggtb	chr3:153520110-153575936	GF_Ileum	CV_Ileum	3.7291	15.9623	2.09777	-3.06254	0.00219466	0.0284489	yes
-	chr3:92092089-92093213	GF_Ileum	CV_Ileum	1.87286	104.947	5.80827	-9.78573	0	0	yes
Il11ra1	chr4:41707315-41721049	GF_Ileum	CV_Ileum	0.162884	3.93595	4.59479	-3.5367	0.000405161	0.00706649	yes
Pum1	chr4:130219215-130337479	GF_Ileum	CV_Ileum	2.84888	16.4888	2.53301	-4.62371	3.77e-06	0.000120129	yes
Asph	chr4:9196463-9596309	GF_Ileum	CV_Ileum	2.22177	12.6033	2.50402	-4.2164	2.48e-05	0.000637197	yes
4933409K07Rik	chr4:41763293-42104673	GF_Ileum	CV_Ileum	0.0119978	18.4671	10.588	-7.25073	4.15e-13	4.44e-11	yes
Rmrp	chr4:43505656-43505931	GF_Ileum	CV_Ileum	12.1518	0.792435	-3.93873	3.43755	0.000587006	0.00968019	yes
-	chr4:97187489-97190389	GF_Ileum	CV_Ileum	1.15989	11.7116	3.33588	-5.09683	3.45e-07	1.39e-05	yes
Fbxo6	chr4:147519824-147526249	GF_Ileum	CV_Ileum	2.4536	20.4207	3.05706	-4.65975	3.17e-06	0.000102577	yes
Tardbp	chr4:147976652-148006413	GF_Ileum	CV_Ileum	7.20614	20.8422	1.53221	-2.91316	0.0035779	0.0418804	yes
Abcb1b	chr5:8798146-8866314	GF_Ileum	CV_Ileum	7.33798	2.41344	-1.60429	3.19689	0.00138916	0.019566	yes
Fgfr3	chr5:34063434-34080073	GF_Ileum	CV_Ileum	1.70733	7.48876	2.13299	-3.06623	0.00216773	0.028164	yes
Uspl1	chr5:149996135-150027097	GF_Ileum	CV_Ileum	1.04769	4.68306	2.16024	-2.97972	0.00288508	0.0353119	yes
Gtf2i	chr5:134713701-134790616	GF_Ileum	CV_Ileum	0.744531	11.7218	3.97672	-6.16157	7.2e-10	4.72e-08	yes
Gtf2ird1	chr5:134833430-134932709	GF_Ileum	CV_Ileum	3.87682	14.4312	1.89624	-3.11915	0.00181374	0.0243918	yes
Gm8615	chr5:149931140-149995639	GF_Ileum	CV_Ileum	11.0187	3.54545	-1.63591	3.29344	0.000989678	0.0148469	yes
-	chr5:90561228-90562035	GF_Ileum	CV_Ileum	2.29916	28.3861	3.62601	-5.89206	3.81e-09	2.24e-07	yes
Tmem140	chr6:34813145-34828296	GF_Ileum	CV_Ileum	5.14861	0.154697	-5.05666	2.95557	0.00312093	0.0375647	yes
Gimap4	chr6:48634576-48642104	GF_Ileum	CV_Ileum	0.36127	2.02464	2.48652	-2.86568	0.00416114	0.0471928	yes
Gng12	chr6:66846390-66971415	GF_Ileum	CV_Ileum	9.82466	142.087	3.85422	-6.53899	6.19e-11	4.81e-09	yes
Reg1	chr6:78373640-78378660	GF_Ileum	CV_Ileum	8.95929	49.504	2.46609	-3.69886	0.000216569	0.00416651	yes
Hnrnpf	chr6:117850357-117875640	GF_Ileum	CV_Ileum	9.41205	134.434	3.83625	-6.54274	6.04e-11	4.7e-09	yes
Clec2i	chr6:128837631-128846866	GF_Ileum	CV_Ileum	0.110774	10.3387	6.54429	-4.51172	6.43e-06	0.000192926	yes
Gm8994	chr6:136277556-136280001	GF_Ileum	CV_Ileum	0.69236	0.0641651	-3.43166	3.42641	0.000611627	0.0100141	yes
Actg2	chr6:83462902-83486245	GF_Ileum	CV_Ileum	0.727914	0.103382	-2.81579	2.90648	0.00365523	0.0426193	yes
Wnk1	chr6:119873874-119988773	GF_Ileum	CV_Ileum	0.57678	9.77116	4.08244	-6.34858	2.17e-10	1.54e-08	yes
Gm6654	chr6:146591100-146599122	GF_Ileum	CV_Ileum	95.3756	16.164	-2.56084	4.44116	8.95e-06	0.000258018	yes
-	chr6:75732148-75732781	GF_Ileum	CV_Ileum	0.128903	12.3768	6.5852	-4.32146	1.55e-05	0.000419271	yes
-	chr6:135299087-135299799	GF_Ileum	CV_Ileum	0.721154	114.17	7.30666	-9.463	0	0	yes
Arhgef1	chr7:25687938-25711614	GF_Ileum	CV_Ileum	3.46194	18.7976	2.44089	-4.14948	3.33e-05	0.000824849	yes
9530053A07Rik	chr7:28914484-28949830	GF_Ileum	CV_Ileum	1.36526	0.183077	-2.89866	4.98277	6.27e-07	2.4e-05	yes
Gm2058	chr7:46843887-46847072	GF_Ileum	CV_Ileum	0.597534	2.4372	2.02813	-3.31296	0.000923145	0.0140307	yes
Htatip2	chr7:57014464-57029491	GF_Ileum	CV_Ileum	2.48515	20.2932	3.02959	-4.21171	2.53e-05	0.000648395	yes
Gpx2-ps1	chr7:107376116-107427382	GF_Ileum	CV_Ileum	11.856	1.63036	-2.86235	3.27594	0.00105311	0.0156306	yes
Gm4535	chr7:148592414-148593231	GF_Ileum	CV_Ileum	6.32531	1.06826	-2.56587	3.44213	0.000577147	0.00954074	yes
Fgf15	chr7:152082436-152086856	GF_Ileum	CV_Ileum	0.478416	9.70385	4.34222	-6.11892	9.42e-10	6.07e-08	yes
Gm6900	chr7:11241630-11242323	GF_Ileum	CV_Ileum	49.4427	10.1948	-2.27792	4.53505	5.76e-06	0.00017517	yes
Opa3	chr7:19812049-19833307	GF_Ileum	CV_Ileum	13.7891	1.8038	-2.93442	2.97408	0.00293868	0.0358257	yes
Saa1	chr7:53995868-53998350	GF_Ileum	CV_Ileum	1.84573	15.4351	3.06395	-4.29565	1.74e-05	0.000464209	yes
Arhgap17	chr7:130421735-130513429	GF_Ileum	CV_Ileum	2.89016	19.9058	2.78397	-4.87853	1.07e-06	3.87e-05	yes
-	chr7:113472902-113473715	GF_Ileum	CV_Ileum	0.537479	6.40625	3.5752	-4.21085	2.54e-05	0.000650466	yes
C330021F23Rik	chr8:3567997-3584776	GF_Ileum	CV_Ileum	13.4716	3.16379	-2.09019	4.09522	4.22e-05	0.00101242	yes
Defa-rs7	chr8:22194718-22195696	GF_Ileum	CV_Ileum	28.6571	1125.4	5.29541	-9.99633	0	0	yes
Defa-rs7	chr8:22331251-22332229	GF_Ileum	CV_Ileum	29.3519	1633.47	5.79834	-10.5695	0	0	yes
Gm15293	chr8:22341282-22342125	GF_Ileum	CV_Ileum	100.523	278.049	1.46781	-3.03762	0.00238453	0.0304058	yes
Defa3	chr8:22427087-22428056	GF_Ileum	CV_Ileum	72.2535	2361.86	5.03071	-9.62269	0	0	yes
Defa17	chr8:22766238-22767208	GF_Ileum	CV_Ileum	124.752	2424.74	4.2807	-7.92291	2.22e-15	3.24e-13	yes
Defa4,Gm15315	chr8:22776268-22777205	GF_Ileum	CV_Ileum	152.942	2236.83	3.8704	-3.85244	0.000116944	0.00245236	yes
Hmgb1-rs17	chr8:34594782-34596229	GF_Ileum	CV_Ileum	1.88262	0.363264	-2.37365	3.38191	0.000719826	0.0114563	yes
Gm16378	chr8:125365477-125366173	GF_Ileum	CV_Ileum	52.6789	19.1489	-1.45996	3.03286	0.00242246	0.0308076	yes
Defa-rs1	chr8:22465566-22466699	GF_Ileum	CV_Ileum	45.293	294.537	2.70109	-5.72495	1.03e-08	5.65e-07	yes
Gm7849	chr8:22565898-22566989	GF_Ileum	CV_Ileum	259.595	884.663	1.76887	-3.69411	0.000220662	0.00422989	yes
Gm7849	chr8:22703846-22704937	GF_Ileum	CV_Ileum	276.788	1154.34	2.06021	-4.16821	3.07e-05	0.000768474	yes
Ppib	chr9:65907975-65917538	GF_Ileum	CV_Ileum	236.051	73.2025	-1.68914	3.46162	0.000536936	0.00897307	yes
Cacna2d2	chr9:107302210-107431844	GF_Ileum	CV_Ileum	0.0362367	0.570299	3.9762	-3.30692	0.000943284	0.0142675	yes
Usp19	chr9:108393006-108404685	GF_Ileum	CV_Ileum	4.7623	17.6251	1.8879	-3.46869	0.000523011	0.00877536	yes
Lars2	chr9:123276057-123371782	GF_Ileum	CV_Ileum	1309.45	65.2562	-4.32671	6.23509	4.52e-10	3.05e-08	yes
Gm16379	chr9:14649687-14650215	GF_Ileum	CV_Ileum	2.97513	0.18643	-3.99625	3.45009	0.000560397	0.00931142	yes
C230081A13Rik	chr9:56048935-56266014	GF_Ileum	CV_Ileum	177.931	17.718	-3.32803	5.20891	1.9e-07	8.08e-06	yes
Senp8	chr9:59582065-59598456	GF_Ileum	CV_Ileum	0.0620789	1.02284	4.04233	-3.01342	0.00258325	0.0323826	yes
-	chr9:7751673-7751761	GF_Ileum	CV_Ileum	37204.2	903.377	-5.36399	5.86576	4.47e-09	2.59e-07	yes
Slc6a14	chrX:21292025-21319483	GF_Ileum	CV_Ileum	0.261738	2.39182	3.19192	-4.20249	2.64e-05	0.000672033	yes
-	chrX:122525361-122526306	GF_Ileum	CV_Ileum	8.39272	43.9608	2.38901	-2.85948	0.00424331	0.0479192	yes
Gm5643	chrX:138732047-138733780	GF_Ileum	CV_Ileum	1.19842	14.6326	3.60998	-6.10279	1.04e-09	6.68e-08	yes
Bcor	chrX:11613863-11737526	GF_Ileum	CV_Ileum	0.419641	3.1267	2.89741	-4.22796	2.36e-05	0.000609177	yes
Gm4987	chrX:43809017-43809523	GF_Ileum	CV_Ileum	2.52049	0.243139	-3.37385	3.0775	0.00208748	0.0273121	yes
Gm6222	chrX:100892752-101017327	GF_Ileum	CV_Ileum	24.9808	6.65949	-1.90733	3.46877	0.000522838	0.00877378	yes
Morf4l2	chrX:133267487-133337900	GF_Ileum	CV_Ileum	4.448	52.2153	3.55324	-5.68348	1.32e-08	7.06e-07	yes
-	chrX:121302012-121302921	GF_Ileum	CV_Ileum	1.78714	6.71902	1.91059	-2.93974	0.00328491	0.0391123	yes
-	chrX:121303040-121303311	GF_Ileum	CV_Ileum	12.4557	99.0814	2.99181	-4.76434	1.89e-06	6.49e-05	yes
Lypla1	chr1:4797973-4836816	GF_Ileum	CV_Ileum	99.2501	130.78	0.397999	-0.846831	0.397089	0.888553	no
Tcea1	chr1:4847774-4887990	GF_Ileum	CV_Ileum	28.0931	28.6497	0.0283064	-0.0606935	0.951603	0.999999	no
Atp6v1h	chr1:5073206-5152630	GF_Ileum	CV_Ileum	34.6192	29.9036	-0.211252	0.457626	0.647221	0.999999	no
Oprk1	chr1:5578573-5596214	GF_Ileum	CV_Ileum	0.268419	0.254436	-0.0771812	0.102568	0.918306	1	no
Rb1cc1	chr1:6199784-6266538	GF_Ileum	CV_Ileum	8.27428	10.8215	0	0	1	1	no
Fam150a	chr1:6349411-6384812	GF_Ileum	CV_Ileum	0	0	0	0	1	1	no
St18	chr1:6477700-6851021	GF_Ileum	CV_Ileum	0.234796	0.233017	-0.0109697	0.0121341	0.990319	1	no
Pcmtd1	chr1:7079000-7163709	GF_Ileum	CV_Ileum	5.22228	7.45214	0.512975	-0.95584	0.339153	0.83722	no
Rrs1	chr1:9535488-9537536	GF_Ileum	CV_Ileum	6.05773	4.36139	-0.473988	0.930613	0.352054	0.849699	no
Adhfe1	chr1:9538126-9621173	GF_Ileum	CV_Ileum	0.122325	0.152689	0.319879	-0.283283	0.77696	1	no
3110035E14Rik	chr1:9538126-9621173	GF_Ileum	CV_Ileum	0	0	0	0	1	1	no
1700034P13Rik	chr1:9708530-9761337	GF_Ileum	CV_Ileum	0.241861	3.28239	3.7625	-0.237281	0.812439	0.999999	no
Sgk3	chr1:9788210-9892649	GF_Ileum	CV_Ileum	2.01088	2.11111	0.0701769	-0.116736	0.907069	0.999999	no
6030422M02Rik	chr1:9898718-9931035	GF_Ileum	CV_Ileum	1.55325	1.62999	0.0695764	-0.119553	0.904837	0.999999	no
Cspp1	chr1:10028298-10127113	GF_Ileum	CV_Ileum	4.49193	6.07861	0.436405	-0.809032	0.418497	0.904379	no
Prex2	chr1:10983545-11293763	GF_Ileum	CV_Ileum	0.037458	0.0207041	-0.855354	0.701906	0.482738	1	no
A830018L16Rik	chr1:11404185-11965983	GF_Ileum	CV_Ileum	0.00276933	0.0123758	2.15991	-0.464192	0.64251	1	no
Sulf1	chr1:12682510-12850453	GF_Ileum	CV_Ileum	0	0	0	0	1	1	no
Xkr9	chr1:13658809-13697046	GF_Ileum	CV_Ileum	19.1202	20.8267	0.123334	-0.213389	0.831024	0.999999	no
Kcnb2	chr1:15302532-15704295	GF_Ileum	CV_Ileum	0.021099	0.0233314	0.145097	-0.108139	0.913886	1	no
Terf1	chr1:15795525-15833766	GF_Ileum	CV_Ileum	4.34755	4.42735	0.0262427	-0.0456934	0.963555	0.999999	no
Rdh10	chr1:16094619-16123802	GF_Ileum	CV_Ileum	5.84387	6.31523	0.111912	-0.196544	0.844184	0.999999	no
D030040B21Rik	chr1:16647632-16652359	GF_Ileum	CV_Ileum	0.163392	0.0938973	-0.799179	0.843046	0.399203	1	no
Tmem70	chr1:16655271-16668356	GF_Ileum	CV_Ileum	15.4371	13.8883	-0.152533	0.303028	0.761868	0.999999	no
Ly96	chr1:16678346-16699694	GF_Ileum	CV_Ileum	6.5944	8.52681	0.370763	-0.454978	0.649125	0.999999	no
Gdap1	chr1:17135453-17154351	GF_Ileum	CV_Ileum	0.00319414	0	-1.79769e+308	-1.79769e+308	0.288813	1	no
Pi15	chr1:17591981-17621020	GF_Ileum	CV_Ileum	0.277107	0.228476	-0.278402	0.416371	0.677138	1	no
Crispld1	chr1:17717497-17756288	GF_Ileum	CV_Ileum	4.02e-05	0	-1.79769e+308	-1.79769e+308	0.478051	1	no
Tcfap2d	chr1:19093102-19156413	GF_Ileum	CV_Ileum	0	0	0	0	1	1	no
Tcfap2b	chr1:19198994-19228815	GF_Ileum	CV_Ileum	0.00410786	0.00143523	-1.5171	0.198897	0.842343	1	no
Mir206	chr1:20669090-20669163	GF_Ileum	CV_Ileum	0	0	0	0	1	1	no
Mir133b	chr1:20672849-20672968	GF_Ileum	CV_Ileum	0	0	0	0	1	1	no
Il17a	chr1:20720985-20724577	GF_Ileum	CV_Ileum	0	0	0	0	1	1	no
Paqr8	chr1:20880637-20929736	GF_Ileum	CV_Ileum	0.513866	0.471836	-0.123107	0.16697	0.867394	0.999999	no
Efhc1	chr1:20941706-20980922	GF_Ileum	CV_Ileum	0.0204819	0.0484717	1.24279	-0.730722	0.464949	1	no
Tmem14a	chr1:21208685-21220248	GF_Ileum	CV_Ileum	4.88329	5.21686	0.0953275	-0.142469	0.88671	0.999999	no
Gsta3	chr1:21230669-21255640	GF_Ileum	CV_Ileum	6.31812	5.00665	-0.33565	0.550819	0.581758	0.989698	no
Khdc1a	chr1:21339757-21342280	GF_Ileum	CV_Ileum	0.00678934	0.00735766	0.115975	-0.0348559	0.972195	1	no
Khdc1c	chr1:21358411-21359824	GF_Ileum	CV_Ileum	0	0.00473057	1.79769e+308	1.79769e+308	0.358682	1	no
Khdc1b	chr1:21373636-21376465	GF_Ileum	CV_Ileum	0	0.00353613	1.79769e+308	1.79769e+308	0.293259	1	no
Mir30a	chr1:23279107-23279178	GF_Ileum	CV_Ileum	0	0	0	0	1	1	no
Mir30c-2	chr1:23298470-23301395	GF_Ileum	CV_Ileum	1.06595	1.36208	0.353674	-0.573651	0.566204	0.983814	no
-	chr1:23361174-23362068	GF_Ileum	CV_Ileum	0	0	0	0	1	1	no
B3gat2	chr1:23768764-23929128	GF_Ileum	CV_Ileum	0.722433	0.607194	-0.250707	0.0851839	0.932115	0.999999	no
Col9a1	chr1:24184448-24259577	GF_Ileum	CV_Ileum	0	0.0105646	1.79769e+308	1.79769e+308	0.11869	1	no
Lmbrd1	chr1:24685018-24823146	GF_Ileum	CV_Ileum	17.8926	18.8792	0.077438	-0.164536	0.86931	0.999999	no
Lgsn	chr1:31197922-31279501	GF_Ileum	CV_Ileum	0	0	0	0	1	1	no
4930521A18Rik	chr1:31279683-31281132	GF_Ileum	CV_Ileum	0	0	0	0	1	1	no
Gm4850	chr1:31321691-31324906	GF_Ileum	CV_Ileum	0	0	0	0	1	1	no
Khdrbs2	chr1:32229650-32714583	GF_Ileum	CV_Ileum	0	0	0	0	1	1	no
1700001G17Rik	chr1:33726668-33727557	GF_Ileum	CV_Ileum	0.034033	0.130949	1.94399	-0.893337	0.371677	1	no
Rab23	chr1:33776740-33799409	GF_Ileum	CV_Ileum	1.11702	0.911027	-0.294093	0.470615	0.637916	0.999999	no
Dst	chr1:34068669-34365724	GF_Ileum	CV_Ileum	10.4251	9.72671	-0.100039	0.180803	0.856522	0.999999	no
Imp4	chr1:34493514-34506196	GF_Ileum	CV_Ileum	13.6824	9.137	-0.582525	0.995595	0.319447	0.816119	no
Ptpn18	chr1:34516590-34530655	GF_Ileum	CV_Ileum	11.1713	10.3092	-0.115864	0.2049	0.83765	0.999999	no
Prss39	chr1:34555274-34559907	GF_Ileum	CV_Ileum	0	0	0	0	1	1	no
Cfc1	chr1:34592492-34601156	GF_Ileum	CV_Ileum	0	0	0	0	1	1	no
Fam123c	chr1:34636537-34647789	GF_Ileum	CV_Ileum	0	0	0	0	1	1	no
Arhgef4	chr1:34858515-34869842	GF_Ileum	CV_Ileum	0.241474	0.233866	-0.0461824	0.0457972	0.963472	1	no
Plekhb2	chr1:34906803-34936430	GF_Ileum	CV_Ileum	115.789	101.889	-0.184496	0.382927	0.701774	0.999999	no
Hs6st1	chr1:36125244-36163291	GF_Ileum	CV_Ileum	22.4398	18.6052	-0.270355	0.577057	0.563901	0.982739	no
Arid5a	chr1:36364577-36380874	GF_Ileum	CV_Ileum	0.462279	0.393167	-0.233624	0.316015	0.751991	0.999999	no
Cnnm4	chr1:36528441-36565621	GF_Ileum	CV_Ileum	99.4784	82.0266	-0.278291	0.436649	0.662366	0.999999	no
Cnnm3	chr1:36568609-36585188	GF_Ileum	CV_Ileum	4.01541	2.98796	-0.426387	0.783463	0.433355	0.915047	no
Cox5b	chr1:36748331-36750233	GF_Ileum	CV_Ileum	397.849	383.317	-0.05368	0.124467	0.900946	0.999999	no
4933424G06Rik	chr1:36771382-36814805	GF_Ileum	CV_Ileum	0.0127188	0.00939499	-0.437	0.119526	0.904859	1	no
Zap70	chr1:36818705-36839661	GF_Ileum	CV_Ileum	0.158427	0.391902	1.30667	-0.95057	0.341823	0.839899	no
-	chr1:37092295-37133840	GF_Ileum	CV_Ileum	0.118439	0.187762	0.664764	-0.622067	0.533898	1	no
-	chr1:37142121-37157658	GF_Ileum	CV_Ileum	0.147689	0.123267	-0.260774	0.0713252	0.943139	1	no
Cnga3	chr1:37276105-37320229	GF_Ileum	CV_Ileum	0.0429531	0.0344408	-0.318643	0.25568	0.798198	1	no
Inpp4a	chr1:37356737-37467580	GF_Ileum	CV_Ileum	8.85359	8.49553	-0.0595595	0.102496	0.918363	0.999999	no
Unc50	chr1:37487012-37495969	GF_Ileum	CV_Ileum	26.9705	24.4086	-0.143991	0.286255	0.774683	0.999999	no
2010300C02Rik	chr1:37668520-37776656	GF_Ileum	CV_Ileum	1.41902	0	-1.79769e+308	-1.79769e+308	0.415114	0.901964	no
Lipt1	chr1:37929050-37947256	GF_Ileum	CV_Ileum	1.71478	1.36748	-0.326503	0.260606	0.794397	0.999999	no
Mrpl30	chr1:37947279-37955378	GF_Ileum	CV_Ileum	49.1605	46.1024	-0.0926596	0.195488	0.845011	0.999999	no
Eif5b	chr1:38054854-38186511	GF_Ileum	CV_Ileum	8.70724	7.17571	-0.279092	0.549658	0.582554	0.989905	no
Nms	chr1:38995993-39007121	GF_Ileum	CV_Ileum	0	0	0	0	1	1	no
Pdcl3	chr1:39044622-39054081	GF_Ileum	CV_Ileum	31.9603	32.7932	0.037118	-0.0800342	0.93621	0.999999	no
Npas2	chr1:39250578-39420085	GF_Ileum	CV_Ileum	9.98766	10.0615	0.0106289	-0.0231192	0.981555	0.999999	no
Rpl31	chr1:39424695-39535592	GF_Ileum	CV_Ileum	243.13	190.608	-0.351118	0.696394	0.486182	0.946255	no
D1Bwg0212e	chr1:39592519-39603722	GF_Ileum	CV_Ileum	8.65904	7.5456	-0.198571	0.434537	0.663898	0.999999	no
Map4k4	chr1:39957600-40084729	GF_Ileum	CV_Ileum	13.0252	12.0506	-0.112207	0.193365	0.846673	0.999999	no
Il1r2	chr1:40133056-40182070	GF_Ileum	CV_Ileum	0.0103471	0.0636973	2.622	-0.552621	0.580523	1	no
Il1r1	chr1:40281924-40373039	GF_Ileum	CV_Ileum	0.00534164	0.0101856	0.931182	-0.224405	0.822442	1	no
Il1rl2	chr1:40381360-40424592	GF_Ileum	CV_Ileum	0.0174992	0.0116205	-0.590615	0.247146	0.804795	1	no
Il1rl1	chr1:40486257-40522259	GF_Ileum	CV_Ileum	0.0673451	0.0824746	0.292377	-0.278635	0.780525	1	no
Il18r1	chr1:40522396-40557743	GF_Ileum	CV_Ileum	0.20371	0.326805	0.681916	-0.503524	0.614596	0.999999	no
Il18rap	chr1:40572206-40606142	GF_Ileum	CV_Ileum	0.0104388	0.0229583	1.13706	-0.504466	0.613934	1	no
Slc9a4	chr1:40637071-40687576	GF_Ileum	CV_Ileum	0.115408	0.14128	0.291813	-0.332502	0.739511	1	no
Slc9a2	chr1:40737221-40826129	GF_Ileum	CV_Ileum	59.3788	57.8446	-0.037766	0.0775758	0.938165	0.999999	no
Tmem182	chr1:40862445-40913808	GF_Ileum	CV_Ileum	0.237317	0.222195	-0.0949938	0.108716	0.913428	1	no
Pou3f3	chr1:42753990-42757054	GF_Ileum	CV_Ileum	0	0	0	0	1	1	no
2900092D14Rik	chr1:42757180-42760021	GF_Ileum	CV_Ileum	0.0302124	0	-1.79769e+308	-1.79769e+308	0.16121	1	no
Mrps9	chr1:42908077-42962528	GF_Ileum	CV_Ileum	17.0669	14.7135	-0.214059	0.438737	0.660852	0.999999	no
Gpr45	chr1:43009716-43092294	GF_Ileum	CV_Ileum	0	0	0	0	1	1	no
AI597479	chr1:43155554-43172791	GF_Ileum	CV_Ileum	4.69213	5.00396	0.0928267	-0.197543	0.843402	0.999999	no
Nck2	chr1:43502595-43643381	GF_Ileum	CV_Ileum	17.9069	14.5479	-0.299709	0.614826	0.53867	0.971237	no
1500015O10Rik	chr1:43787446-43799409	GF_Ileum	CV_Ileum	0	0.0156619	1.79769e+308	1.79769e+308	0.267392	1	no
Tpp2	chr1:43989190-44059926	GF_Ileum	CV_Ileum	11.1704	10.7647	-0.0533763	0.114972	0.908467	0.999999	no
Bivm	chr1:44175632-44201827	GF_Ileum	CV_Ileum	3.57583	3.27165	-0.12826	0.22102	0.825077	0.999999	no
Ercc5	chr1:44204588-44238105	GF_Ileum	CV_Ileum	4.01916	3.77937	-0.0887478	0.170309	0.864767	0.999999	no
Gulp1	chr1:44608515-44853681	GF_Ileum	CV_Ileum	0.0200369	0	-1.79769e+308	-1.79769e+308	0.319154	1	no
Col3a1	chr1:45368382-45406551	GF_Ileum	CV_Ileum	0.0161805	0.00162665	-3.31428	1.16889	0.242447	1	no
Wdr75	chr1:45852345-45880474	GF_Ileum	CV_Ileum	5.51967	4.63793	-0.2511	0.361947	0.717391	0.999999	no
-	chr1:45964914-45985131	GF_Ileum	CV_Ileum	0	0.107149	1.79769e+308	1.79769e+308	0.425237	1	no
Dnahc7b	chr1:46123582-46430395	GF_Ileum	CV_Ileum	0.0634857	0.0723206	0.187975	-0.211567	0.832445	1	no
Tmeff2	chr1:50984366-51244114	GF_Ileum	CV_Ileum	0.0820698	0.185563	1.17698	-0.676243	0.498887	1	no
Sdpr	chr1:51345969-51359804	GF_Ileum	CV_Ileum	0	0.00987857	1.79769e+308	1.79769e+308	0.157356	1	no
Stat4	chr1:52065087-52164028	GF_Ileum	CV_Ileum	0.0788834	0.148104	0.908815	-0.877528	0.3802	1	no
Stat1	chr1:52176281-52218709	GF_Ileum	CV_Ileum	16.6717	15.6521	-0.0910426	0.173716	0.862089	0.999999	no
-	chr1:52328608-52332094	GF_Ileum	CV_Ileum	0.374607	0.790276	1.07698	-0.745617	0.455899	0.929881	no
Tmem194b	chr1:52687548-52708925	GF_Ileum	CV_Ileum	0.832516	1.12041	0.428478	-0.548616	0.583269	0.990231	no
-	chr1:52713006-52809005	GF_Ileum	CV_Ileum	0	0.0423359	1.79769e+308	1.79769e+308	0.473062	1	no
Hibch	chr1:52901889-53010169	GF_Ileum	CV_Ileum	6.39155	6.42118	0.00667198	-0.00816197	0.993488	0.999999	no
Mstn	chr1:53118506-53124923	GF_Ileum	CV_Ileum	0	0	0	0	1	1	no
Ormdl1	chr1:53353938-53367089	GF_Ileum	CV_Ileum	15.1926	12.3367	-0.300408	0.663876	0.50677	0.955761	no
Osgepl1	chr1:53370120-53383185	GF_Ileum	CV_Ileum	5.66342	5.01438	-0.175602	0.279717	0.779695	0.999999	no
Ccdc150	chr1:54307526-54425571	GF_Ileum	CV_Ileum	0.018414	0.0244262	0.407624	-0.268257	0.788501	1	no
Coq10b	chr1:55109613-55129546	GF_Ileum	CV_Ileum	18.9693	15.5877	-0.283253	0.553295	0.580061	0.98919	no
Hspe1	chr1:55134635-55148161	GF_Ileum	CV_Ileum	60.0625	52.8573	-0.18436	0.173454	0.862295	0.999999	no
Mobkl3	chr1:55188088-55292388	GF_Ileum	CV_Ileum	16.8186	17.6323	0.0681622	-0.148678	0.881808	0.999999	no
Rftn2	chr1:55188088-55292388	GF_Ileum	CV_Ileum	0.105638	0.0608242	-0.796415	0.0873034	0.93043	1	no
Mars2	chr1:55293848-55306138	GF_Ileum	CV_Ileum	4.02354	3.33341	-0.271463	0.435222	0.663401	0.999999	no
Plcl1	chr1:55462789-55811129	GF_Ileum	CV_Ileum	0.0424167	0.0226716	-0.903748	0.810055	0.417908	1	no
-	chr1:55943947-55979550	GF_Ileum	CV_Ileum	0.00150093	0	-1.79769e+308	-1.79769e+308	0.418661	1	no
-	chr1:56027369-56028951	GF_Ileum	CV_Ileum	0.342626	0.0517392	-2.72731	1.87447	0.0608661	1	no
9130024F11Rik	chr1:56850824-57038477	GF_Ileum	CV_Ileum	2.73169	3.57363	0.387595	-0.141377	0.887572	0.999999	no
-	chr1:56850824-57038477	GF_Ileum	CV_Ileum	0.0210238	0.0368693	0.810399	-0.0260278	0.979235	1	no
1700066M21Rik	chr1:57434463-57442470	GF_Ileum	CV_Ileum	1.32068	1.28374	-0.0409234	0.062281	0.950339	0.999999	no
9430016H08Rik	chr1:57445087-57472802	GF_Ileum	CV_Ileum	10.5305	10.8889	0.0482807	-0.0938297	0.925244	0.999999	no
Spats2l	chr1:57831704-58005480	GF_Ileum	CV_Ileum	6.44583	4.55701	-0.500279	1.02185	0.306851	0.802199	no
Sgol2	chr1:58042183-58083121	GF_Ileum	CV_Ileum	1.00879	1.15855	0.199683	-0.308442	0.757746	0.999999	no
Aox1	chr1:58086812-58163254	GF_Ileum	CV_Ileum	0.00571101	0.0025722	-1.15074	0.374626	0.707938	1	no
Aox3	chr1:58169979-58257296	GF_Ileum	CV_Ileum	0	0	0	0	1	1	no
Aox4	chr1:58267240-58325440	GF_Ileum	CV_Ileum	0.00250359	0	-1.79769e+308	-1.79769e+308	0.288813	1	no
Aox3l1	chr1:58335169-58436108	GF_Ileum	CV_Ileum	0	0.00190663	1.79769e+308	1.79769e+308	0.287998	1	no
Bzw1	chr1:58447725-58464253	GF_Ileum	CV_Ileum	70.5182	66.0675	-0.0940556	0.1817	0.855818	0.999999	no
Nif3l1	chr1:58487836-58561790	GF_Ileum	CV_Ileum	7.78191	6.40975	-0.279855	0.430338	0.66695	0.999999	no
Ndufb3	chr1:58643442-58652792	GF_Ileum	CV_Ileum	95.3148	97.0126	0.0254714	-0.0584304	0.953406	0.999999	no
Als2cr12	chr1:58709373-58752833	GF_Ileum	CV_Ileum	10.7248	50.0374	2.22206	-0.105282	0.916152	0.999999	no
Cflar	chr1:58769030-58815844	GF_Ileum	CV_Ileum	16.8741	19.8717	0.235903	-0.359467	0.719246	0.999999	no
Casp8	chr1:58852217-58915525	GF_Ileum	CV_Ileum	75.085	73.0355	-0.0399268	0.0790999	0.936953	0.999999	no
Stradb	chr1:59030388-59052166	GF_Ileum	CV_Ileum	11.6997	10.6936	-0.12972	0.253776	0.799668	0.999999	no
Cdk15	chr1:59313750-59409213	GF_Ileum	CV_Ileum	0	0	0	0	1	1	no
Fzd7	chr1:59538867-59546620	GF_Ileum	CV_Ileum	5.03433	4.37989	-0.200904	0.405659	0.684993	0.999999	no
Gm973	chr1:59573107-59691353	GF_Ileum	CV_Ileum	0.0140578	0.0074064	-0.924532	0.44232	0.658258	1	no
Nop58	chr1:59741817-59768364	GF_Ileum	CV_Ileum	18.5188	14.9469	-0.309147	0.647922	0.517035	0.960803	no
Snord70	chr1:59741817-59768364	GF_Ileum	CV_Ileum	0	0	0	0	1	1	no
Snord11	chr1:59741817-59768364	GF_Ileum	CV_Ileum	0	0	0	0	1	1	no
Bmpr2	chr1:59820237-59934648	GF_Ileum	CV_Ileum	3.08405	3.80414	0.302746	-0.667324	0.504565	0.954708	no
Fam117b	chr1:59969849-60042190	GF_Ileum	CV_Ileum	12.0022	10.0852	-0.251055	0.519579	0.603357	0.996841	no
Carf	chr1:60132905-60210878	GF_Ileum	CV_Ileum	0.601849	0.813165	0.434147	-0.422479	0.672675	0.999999	no
Nbeal1	chr1:60237442-60395159	GF_Ileum	CV_Ileum	4.41409	6.55032	0	0	1	1	no
Cyp20a1	chr1:60399929-60445028	GF_Ileum	CV_Ileum	3.82153	2.46496	-0.632588	0.88774	0.374681	0.870214	no
Abi2	chr1:60466462-60539693	GF_Ileum	CV_Ileum	0.826048	1.50497	0.865436	-1.44653	0.148029	0.559901	no
Cd28	chr1:60803231-60830203	GF_Ileum	CV_Ileum	0.0292983	0.0146895	-0.996032	0.657536	0.510837	1	no
Ctla4	chr1:60965868-60972674	GF_Ileum	CV_Ileum	0.0068632	0.0158345	1.20612	-0.406434	0.684424	1	no
Icos	chr1:61034757-61057164	GF_Ileum	CV_Ileum	0.00780983	0.010568	0.436345	-0.180653	0.85664	1	no
9530026F06Rik	chr1:61435275-61452748	GF_Ileum	CV_Ileum	1.54028	1.26188	-0.28761	0.406026	0.684723	0.999999	no
Pard3b	chr1:61685397-62688858	GF_Ileum	CV_Ileum	3.37233	4.11486	0.287096	-0.672041	0.501558	0.953139	no
Nrp2	chr1:62749325-62865266	GF_Ileum	CV_Ileum	0.113733	0.107085	-0.0868988	0.0889055	0.929157	1	no
Ino80d	chr1:63094374-63171517	GF_Ileum	CV_Ileum	0.535171	0.671322	0	0	1	1	no
Eef1b2	chr1:63223404-63227060	GF_Ileum	CV_Ileum	149.418	111.162	-0.426687	0.958651	0.337735	0.835777	no
Snora41	chr1:63223404-63227060	GF_Ileum	CV_Ileum	0	0	0	0	1	1	no
Zdbf2	chr1:63319842-63361149	GF_Ileum	CV_Ileum	0	0	0	0	1	1	no
Adam23	chr1:63492477-63643089	GF_Ileum	CV_Ileum	0.021704	0.0139393	-0.638804	0.365721	0.714573	1	no
Fastkd2	chr1:63777198-63799959	GF_Ileum	CV_Ileum	4.11629	3.79877	-0.115809	0.200388	0.841177	0.999999	no
Gm13749	chr1:64011300-64015573	GF_Ileum	CV_Ileum	0	0	0	0	1	1	no
Creb1	chr1:64579158-64651327	GF_Ileum	CV_Ileum	5.0784	5.38548	0.0847015	-0.171729	0.863651	0.999999	no
Ccnyl1	chr1:64737518-64772388	GF_Ileum	CV_Ileum	12.8333	15.836	0.303313	-0.635191	0.525304	0.965236	no
Fzd5	chr1:64777131-64784324	GF_Ileum	CV_Ileum	7.73516	0	-1.79769e+308	-1.79769e+308	0.107673	0.467193	no
Pikfyve	chr1:65233250-65325270	GF_Ileum	CV_Ileum	2.53905	2.74944	0.114852	-0.247517	0.804508	0.999999	no
Pth2r	chr1:65357830-65435818	GF_Ileum	CV_Ileum	0	0	0	0	1	1	no
Crygf	chr1:65973095-65974878	GF_Ileum	CV_Ileum	0	0	0	0	1	1	no
Mtap2	chr1:66221902-66489157	GF_Ileum	CV_Ileum	0.18625	0.165605	-0.169494	0.225671	0.821457	1	no
Unc80	chr1:66515020-66745722	GF_Ileum	CV_Ileum	0.0300981	0.0165563	-0.862291	0.89735	0.369532	1	no
Rpe	chr1:66747420-66864169	GF_Ileum	CV_Ileum	12.798	14.1795	0.147886	-0.309926	0.756617	0.999999	no
Cps1	chr1:67158361-67277839	GF_Ileum	CV_Ileum	90.4029	63.8667	-0.501306	1.02426	0.305711	0.800785	no
Spag16	chr1:69873561-70771706	GF_Ileum	CV_Ileum	0	0	0	0	1	1	no
Vwc2l	chr1:70772288-70931971	GF_Ileum	CV_Ileum	0	0	0	0	1	1	no
Atic	chr1:71603729-71625977	GF_Ileum	CV_Ileum	15.7265	11.0644	-0.50728	1.12644	0.259979	0.745479	no
Apol7d	chr1:71699908-71709417	GF_Ileum	CV_Ileum	0	0	0	0	1	1	no
Gm8883	chr1:71934685-71937778	GF_Ileum	CV_Ileum	0	0	0	0	1	1	no
Tmem169	chr1:72330946-72349569	GF_Ileum	CV_Ileum	0.130126	0.0841583	-0.628728	0.585784	0.558021	1	no
Xrcc5	chr1:72353994-72441527	GF_Ileum	CV_Ileum	5.76365	4.60132	-0.324937	0.642617	0.520473	0.9626	no
Smarcal1	chr1:72629824-72683364	GF_Ileum	CV_Ileum	1.6859	1.38701	-0.281543	0.512977	0.607968	0.998392	no
Rpl37a	chr1:72757833-72760387	GF_Ileum	CV_Ileum	480.513	375.211	-0.356874	0.660079	0.509203	0.956998	no
Igfbp2	chr1:72871076-72899045	GF_Ileum	CV_Ileum	0	0	0	0	1	1	no
1700027A15Rik	chr1:73062609-73072082	GF_Ileum	CV_Ileum	0	0	0	0	1	1	no
D530049I02Rik	chr1:73437958-73477353	GF_Ileum	CV_Ileum	0	0	0	0	1	1	no
Rufy4	chr1:74172114-74194804	GF_Ileum	CV_Ileum	0	0	0	0	1	1	no
Cxcr2	chr1:74200567-74207820	GF_Ileum	CV_Ileum	0.605272	0.641814	0.0845698	-0.128606	0.89767	0.999999	no
Arpc2	chr1:74282877-74314792	GF_Ileum	CV_Ileum	260.274	266.954	0.0365593	-0.0727096	0.942037	0.999999	no
Gpbar1	chr1:74325173-74326163	GF_Ileum	CV_Ileum	0.112195	0.0519281	-1.11142	0.672862	0.501035	1	no
Pnkd	chr1:74331607-74400266	GF_Ileum	CV_Ileum	27.8889	28.0437	0.0079838	-0.00478425	0.996183	0.999999	no
Gm216	chr1:74408681-74415895	GF_Ileum	CV_Ileum	0.0250175	0.0318389	0.347855	-0.185193	0.853078	1	no
Slc11a1	chr1:74421776-74432625	GF_Ileum	CV_Ileum	0.0169659	0.0360906	1.08899	-0.55023	0.582161	1	no
Ctdsp1	chr1:74438182-74443926	GF_Ileum	CV_Ileum	70.5719	69.9289	-0.0132062	0.0289056	0.97694	0.999999	no
Mir26b	chr1:74438182-74443926	GF_Ileum	CV_Ileum	0	98.4841	1.79769e+308	1.79769e+308	0.481814	0.944578	no
Vil1	chr1:74449292-74634802	GF_Ileum	CV_Ileum	1076.03	973.48	-0.144495	0.163191	0.870368	0.999999	no
Rqcd1	chr1:74449292-74634802	GF_Ileum	CV_Ileum	18.804	15.4126	-0.286927	0.00815897	0.99349	0.999999	no
Plcd4	chr1:74449292-74634802	GF_Ileum	CV_Ileum	0	0	0	0	1	1	no
Bcs1l	chr1:74634849-74639327	GF_Ileum	CV_Ileum	3.54305	2.3401	-0.598421	0.875814	0.381131	0.875361	no
Stk36	chr1:74640325-74683467	GF_Ileum	CV_Ileum	0.107773	0.0899111	-0.261429	0.0815675	0.934991	1	no
Ttll4	chr1:74708226-74748613	GF_Ileum	CV_Ileum	3.92298	3.30391	-0.247778	0.519848	0.603169	0.996835	no
Cyp27a1	chr1:74759730-74784616	GF_Ileum	CV_Ileum	35.875	36.3176	0.0176909	-0.0334564	0.973311	0.999999	no
Wnt6	chr1:74798876-74831893	GF_Ileum	CV_Ileum	1.24826	1.29344	0.0512962	-0.0554832	0.955753	0.999999	no
Wnt10a	chr1:74838592-74850749	GF_Ileum	CV_Ileum	0.00674729	0.0176877	1.39037	-0.463104	0.64329	1	no
Cdk5r2	chr1:74901602-74904306	GF_Ileum	CV_Ileum	0.115181	0.0698249	-0.722086	0.707051	0.479535	1	no
Fam134a	chr1:75131788-75144483	GF_Ileum	CV_Ileum	62.2053	46.3566	-0.424263	0.679505	0.496818	0.951034	no
Zfand2b	chr1:75165219-75168200	GF_Ileum	CV_Ileum	43.0485	32.5338	-0.404024	0.871936	0.383243	0.87728	no
Ankzf1	chr1:75177432-75207353	GF_Ileum	CV_Ileum	19.7591	12.9872	-0.605426	0.513829	0.607371	0.998158	no
Stk16	chr1:75207403-75215828	GF_Ileum	CV_Ileum	34.0198	26.3219	-0.370109	0.470806	0.637779	0.999999	no
Dnajb2	chr1:75232997-75242271	GF_Ileum	CV_Ileum	6.63099	14.9155	1.16951	-1.46048	0.144159	0.551563	no
Speg	chr1:75371871-75439751	GF_Ileum	CV_Ileum	0.00247116	0.0363221	3.87759	-0.0378855	0.969779	1	no
Gmppa	chr1:75371871-75439751	GF_Ileum	CV_Ileum	38.7625	28.9571	-0.420745	0.781704	0.434389	0.915753	no
Accn4	chr1:75447084-75470915	GF_Ileum	CV_Ileum	0	0.00392703	1.79769e+308	1.79769e+308	0.293259	1	no
Tmem198	chr1:75476106-75482268	GF_Ileum	CV_Ileum	0.332126	0.325097	-0.0308588	0.0391685	0.968756	0.999999	no
Inha	chr1:75503651-75506929	GF_Ileum	CV_Ileum	0.0932574	0.110907	0.250057	-0.198976	0.842281	1	no
Stk11ip	chr1:75518103-75533910	GF_Ileum	CV_Ileum	4.48589	3.39615	-0.401497	0.83314	0.404766	0.894356	no
Slc4a3	chr1:75542840-75556006	GF_Ileum	CV_Ileum	0.0390936	0.0188535	-1.0521	0.80302	0.421963	1	no
Gm17751	chr1:76485707-76498603	GF_Ileum	CV_Ileum	0	0	0	0	1	1	no
Sgpp2	chr1:78306075-78416922	GF_Ileum	CV_Ileum	46.1855	41.1928	-0.165047	0.352112	0.724755	0.999999	no
Mogat1	chr1:78507634-78534748	GF_Ileum	CV_Ileum	0	0.0388535	1.79769e+308	1.79769e+308	0.121577	1	no
Acsl3,Utp14b	chr1:78654388-78704318	GF_Ileum	CV_Ileum	7.99987	9.12517	0.189875	-0.344593	0.7304	0.999999	no
Kcne4	chr1:78813523-78816600	GF_Ileum	CV_Ileum	0.0105213	0	-1.79769e+308	-1.79769e+308	0.236268	1	no
Mrpl44	chr1:79772592-79778020	GF_Ileum	CV_Ileum	12.5431	9.64634	-0.378838	0.789647	0.429734	0.912445	no
1700016L21Rik	chr1:80442506-80472235	GF_Ileum	CV_Ileum	0	0	0	0	1	1	no
9430031J16Rik	chr1:81073891-81268226	GF_Ileum	CV_Ileum	0	0	0	0	1	1	no
Rhbdd1	chr1:82313153-82442013	GF_Ileum	CV_Ileum	6.23281	5.6836	-0.133078	0.267125	0.789373	0.999999	no
Col4a3	chr1:82583495-82718634	GF_Ileum	CV_Ileum	0.0330186	0.0525951	0.671653	-0.717216	0.473241	1	no
Mff	chr1:82721328-82765031	GF_Ileum	CV_Ileum	22.9743	26.0006	0.178524	-0.151482	0.879596	0.999999	no
Agfg1	chr1:82835993-82905118	GF_Ileum	CV_Ileum	20.693	21.2175	0.0361122	-0.0676597	0.946057	0.999999	no
Ccl20	chr1:83113340-83115742	GF_Ileum	CV_Ileum	0.545944	0.806615	0.563127	-0.416893	0.676756	0.999999	no
Wdr69	chr1:83156336-83207147	GF_Ileum	CV_Ileum	0	0	0	0	1	1	no
Mir5126	chr1:84366413-84692796	GF_Ileum	CV_Ileum	0	0	0	0	1	1	no
Fbxo36	chr1:84836415-84897061	GF_Ileum	CV_Ileum	3.95279	2.83601	-0.479008	0.7826	0.433862	0.915384	no
Gm7609	chr1:85196185-85210337	GF_Ileum	CV_Ileum	1.96206	4.27758	1.12442	-1.81131	0.070093	0.359315	no
Sp140	chr1:87344098-87541670	GF_Ileum	CV_Ileum	0.119229	0.422787	1.8262	-1.42605	0.153854	0.572084	no
Sp100	chr1:87546542-87606576	GF_Ileum	CV_Ileum	4.15449	5.10537	0.297344	-0.416762	0.676853	0.999999	no
Cab39	chr1:87690008-87761187	GF_Ileum	CV_Ileum	98.3208	104.906	0.0935358	-0.176771	0.859689	0.999999	no
Itm2c	chr1:87784195-87805273	GF_Ileum	CV_Ileum	18.6533	13.1433	-0.505105	1.12874	0.259009	0.7439	no
4933407L21Rik	chr1:87825057-87828331	GF_Ileum	CV_Ileum	0.0124416	0.0400543	1.68679	-0.587616	0.55679	1	no
Spata3	chr1:87918516-87926533	GF_Ileum	CV_Ileum	0	0	0	0	1	1	no
2810459M11Rik	chr1:87942416-87957768	GF_Ileum	CV_Ileum	4.28773	4.80964	0.165717	-0.314781	0.752928	0.999999	no
Psmd1	chr1:87961193-88035870	GF_Ileum	CV_Ileum	39.4404	29.7707	-0.405784	0.652543	0.514051	0.959544	no
Armc9	chr1:88051354-88177363	GF_Ileum	CV_Ileum	0.495231	0.381841	-0.37513	0.409565	0.682125	0.999999	no
B3gnt7	chr1:88177465-88203880	GF_Ileum	CV_Ileum	8.22536	5.48198	-0.585382	1.11374	0.265393	0.752594	no
C130036L24Rik	chr1:88238548-88264539	GF_Ileum	CV_Ileum	0.314904	0.260688	0	0	1	1	no
1700019O17Rik	chr1:88322903-88324624	GF_Ileum	CV_Ileum	0	0	0	0	1	1	no
Ptma	chr1:88423310-88427273	GF_Ileum	CV_Ileum	326.913	307.037	-0.0904983	0.194246	0.845983	0.999999	no
Cops7b	chr1:88479415-88503398	GF_Ileum	CV_Ileum	7.5588	5.93724	-0.348366	0.665128	0.505969	0.95552	no
Dis3l2	chr1:88600378-88946721	GF_Ileum	CV_Ileum	6.50354	4.9932	-0.381259	0.712162	0.476364	0.941692	no
1700027L20Rik	chr1:89080067-89084979	GF_Ileum	CV_Ileum	0	0	0	0	1	1	no
Chrnd	chr1:89087226-89096645	GF_Ileum	CV_Ileum	0.0043978	5.63e-05	-6.28668	0.247961	0.804164	1	no
Chrng	chr1:89102385-89108410	GF_Ileum	CV_Ileum	0	0	0	0	1	1	no
Eif4e2	chr1:89110374-89137063	GF_Ileum	CV_Ileum	46.7018	39.8533	-0.228781	0.3405	0.73348	0.999999	no
Efhd1	chr1:89160938-89207413	GF_Ileum	CV_Ileum	1.0796	1.33436	0.305655	-0.358017	0.720331	0.999999	no
Gigyf2	chr1:89223572-89347385	GF_Ileum	CV_Ileum	15.1037	14.6846	-0.0405935	0.0887676	0.929267	0.999999	no
3110079O15Rik	chr1:89366838-89372034	GF_Ileum	CV_Ileum	0	0.0701202	1.79769e+308	1.79769e+308	0.220895	1	no
Neu2	chr1:89470601-89494415	GF_Ileum	CV_Ileum	0.810832	0.634805	-0.353091	0.366502	0.71399	0.999999	no
Inpp5d	chr1:89504321-89617083	GF_Ileum	CV_Ileum	0.999178	1.22979	0.299594	-0.392586	0.694625	0.999999	no
Atg16l1	chr1:89652585-89689003	GF_Ileum	CV_Ileum	9.22573	5.99899	-0.620944	1.19797	0.230929	0.70567	no
Scarna6	chr1:89652585-89689003	GF_Ileum	CV_Ileum	0.33941	0.470814	0.472127	-0.0322445	0.974277	0.999999	no
Sag	chr1:89700254-89741732	GF_Ileum	CV_Ileum	0.0598809	0.0619383	0.0487353	-0.0347435	0.972284	1	no
Dgkd	chr1:89749858-89905128	GF_Ileum	CV_Ileum	66.0748	66.1041	0.000640455	-0.00108468	0.999135	0.999999	no
Ugt1a1,Ugt1a10,Ugt1a2,Ugt1a5,Ugt1a6a,Ugt1a6b,Ugt1a7c,Ugt1a9	chr1:89951985-90116577	GF_Ileum	CV_Ileum	45.1221	91.5985	1.02149	-1.8192	0.0688809	0.355224	no
Heatr7b1	chr1:90123594-90174235	GF_Ileum	CV_Ileum	0.247087	0.145241	-0.766572	0.0575517	0.954106	1	no
Trpm8	chr1:90203286-90285426	GF_Ileum	CV_Ileum	0	0	0	0	1	1	no
Spp2	chr1:90303593-90323013	GF_Ileum	CV_Ileum	0.0349765	0.0160835	-1.1208	0.364879	0.715202	1	no
Gm19589	chr1:90448091-90458741	GF_Ileum	CV_Ileum	0.0613192	0.0428768	-0.516144	0.409625	0.682081	1	no
2410088K16Rik	chr1:90651464-90652308	GF_Ileum	CV_Ileum	0.0411283	0.185614	2.1741	-0.778019	0.436558	1	no
1700067G17Rik	chr1:90912687-90918785	GF_Ileum	CV_Ileum	0.111179	0.021909	-2.34329	0.766524	0.443365	1	no
Sh3bp4	chr1:90952065-91051695	GF_Ileum	CV_Ileum	5.41759	4.37392	-0.308723	0.595886	0.551252	0.977045	no
Agap1	chr1:91351385-91802269	GF_Ileum	CV_Ileum	9.74119	7.51636	-0.374064	0.745414	0.456021	0.929886	no
Cxcr7	chr1:92100577-92112863	GF_Ileum	CV_Ileum	0.109773	0.096896	-0.180016	0.174885	0.86117	1	no
Cops8	chr1:92499999-92509916	GF_Ileum	CV_Ileum	14.6331	11.0343	-0.407247	0.7291	0.46594	0.936362	no
Mlph	chr1:92811654-92847961	GF_Ileum	CV_Ileum	13.2442	9.19717	-0.526097	1.15698	0.24728	0.728427	no
Prlh	chr1:92849684-92850589	GF_Ileum	CV_Ileum	0	0.156148	1.79769e+308	1.79769e+308	0.267392	1	no
Lrrfip1	chr1:92895303-93027168	GF_Ileum	CV_Ileum	12.0381	14.6257	0.2809	-0.4583	0.646737	0.999999	no
Rbm44	chr1:93041679-93067372	GF_Ileum	CV_Ileum	0.00326907	0.00477883	0.547778	-0.172879	0.862746	1	no
Ramp1	chr1:93076398-93121773	GF_Ileum	CV_Ileum	10.1065	5.38732	-0.90764	1.21285	0.225186	0.696799	no
Scly,Ube2f	chr1:93146889-93217657	GF_Ileum	CV_Ileum	31.3505	23.5772	-0.411093	0.714934	0.47465	0.940823	no
Espnl	chr1:93218651-93244880	GF_Ileum	CV_Ileum	0.0202099	0.00509078	-1.9891	1.06331	0.287643	1	no
Klhl30	chr1:93247649-93258981	GF_Ileum	CV_Ileum	0	0.00978611	1.79769e+308	1.79769e+308	0.170805	1	no
Fam132b	chr1:93263006-93272260	GF_Ileum	CV_Ileum	3.47493	2.39036	-0.539756	0.892562	0.372092	0.86798	no
Traf3ip1	chr1:93391224-93425884	GF_Ileum	CV_Ileum	2.26676	2.14415	-0.0802256	0.141298	0.887635	0.999999	no
Asb1	chr1:93437141-93456331	GF_Ileum	CV_Ileum	1.07029	0.972726	-0.137899	0.24367	0.807487	0.999999	no
Twist2	chr1:93698053-93744604	GF_Ileum	CV_Ileum	0	0	0	0	1	1	no
Ndufa10	chr1:94326784-94378140	GF_Ileum	CV_Ileum	71.9972	17.7129	-2.02314	1.35666	0.174888	0.612224	no
Olfr1413	chr1:94469701-94470783	GF_Ileum	CV_Ileum	0	0	0	0	1	1	no
Olfr1412	chr1:94484908-94485874	GF_Ileum	CV_Ileum	0	0	0	0	1	1	no
Olfr1411	chr1:94493097-94494069	GF_Ileum	CV_Ileum	0	0	0	0	1	1	no
Olfr1410	chr1:94504415-94505384	GF_Ileum	CV_Ileum	0	0	0	0	1	1	no
Olfr12	chr1:94516457-94517578	GF_Ileum	CV_Ileum	0	0	0	0	1	1	no
Gpc1	chr1:94728262-94756773	GF_Ileum	CV_Ileum	0.148986	0.161772	0.11879	-0.144726	0.884927	1	no
Mir149	chr1:94728262-94756773	GF_Ileum	CV_Ileum	0	0	0	0	1	1	no
Dusp28	chr1:94803565-94805197	GF_Ileum	CV_Ileum	3.37665	2.3063	-0.550015	0.945917	0.344191	0.842299	no
Rnpepl1	chr1:94805494-94821015	GF_Ileum	CV_Ileum	60.0182	46.5438	-0.366812	0.780759	0.434944	0.916247	no
Capn10	chr1:94830119-94886078	GF_Ileum	CV_Ileum	14.8203	14.0423	0	0	1	1	no
Gpr35	chr1:94830119-94886078	GF_Ileum	CV_Ileum	6.22676	4.8018	0	0	1	1	no
Aqp12	chr1:94902910-94908846	GF_Ileum	CV_Ileum	0.0532414	0.0124282	-2.09893	0.291093	0.77098	1	no
Agxt	chr1:95031852-95041998	GF_Ileum	CV_Ileum	0.417735	0.184401	-1.17974	1.2326	0.217726	0.685028	no
Sned1	chr1:95132419-95202595	GF_Ileum	CV_Ileum	0.965474	0.992114	0.0392689	-0.04536	0.96382	0.999999	no
Ppp1r7	chr1:95205387-95268644	GF_Ileum	CV_Ileum	8.28567	8.00267	-0.0501362	0.0994152	0.920809	0.999999	no
Ano7	chr1:95270318-95375385	GF_Ileum	CV_Ileum	16.995	16.2101	-0.0682145	0.0333569	0.97339	0.999999	no
2014-09-02	chr1:95375569-95406309	GF_Ileum	CV_Ileum	27.7841	26.9235	-0.045394	0.0987781	0.921314	0.999999	no
Farp2	chr1:95408669-95551824	GF_Ileum	CV_Ileum	8.6698	8.26617	-0.0687787	0.047621	0.962018	0.999999	no
Bok	chr1:95582270-95592474	GF_Ileum	CV_Ileum	13.5459	13.3524	-0.02075	0.0346857	0.97233	0.999999	no
Atg4b	chr1:95601964-95686106	GF_Ileum	CV_Ileum	18.5221	12.2965	-0.591001	0.93121	0.351745	0.849553	no
Ing5	chr1:95700150-95718677	GF_Ileum	CV_Ileum	4.68122	3.94927	-0.245299	0.453346	0.6503	0.999999	no
D2hgdh	chr1:95721816-95753573	GF_Ileum	CV_Ileum	9.08123	7.01283	-0.37289	0.664514	0.506361	0.955632	no
-	chr1:95753881-95755181	GF_Ileum	CV_Ileum	4.33783	3.98899	-0.120949	0.146	0.883921	0.999999	no
Gal3st2	chr1:95757920-95773071	GF_Ileum	CV_Ileum	144.461	147.499	0.0300264	-0.0608284	0.951496	0.999999	no
-	chr1:95786657-95796583	GF_Ileum	CV_Ileum	1.89952	1.259	-0.593358	0.780891	0.434867	0.91624	no
Gm9994	chr1:95815013-95913854	GF_Ileum	CV_Ileum	27.2218	29.0479	0.0936707	-0.173927	0.861923	0.999999	no
Gm6086	chr1:95815013-95913854	GF_Ileum	CV_Ileum	3.05743	2.00971	-0.605335	0.667366	0.504539	0.954694	no
-	chr1:95815013-95913854	GF_Ileum	CV_Ileum	9.04461	11.6377	0.363681	-0.124486	0.900931	0.999999	no
-	chr1:95815013-95913854	GF_Ileum	CV_Ileum	0.948263	0.371304	-1.35269	0.129964	0.896595	0.999999	no
Neu4	chr1:95917069-95924907	GF_Ileum	CV_Ileum	0.00277292	0	-1.79769e+308	-1.79769e+308	0.288813	1	no
4930440C22Rik	chr1:96694018-96699049	GF_Ileum	CV_Ileum	0	0	0	0	1	1	no
Fam174a	chr1:97210204-97231861	GF_Ileum	CV_Ileum	4.44779	4.64736	0.0633237	-0.124182	0.901172	0.999999	no
-	chr1:98768853-98775638	GF_Ileum	CV_Ileum	0.150137	0.0571106	-1.39445	1.04839	0.294459	1	no
Gin1	chr1:99602622-99689808	GF_Ileum	CV_Ileum	4.28602	5.18228	0.273949	-0.081485	0.935056	0.999999	no
1810006J02Rik	chr1:100028043-100041232	GF_Ileum	CV_Ileum	0.115465	0.0942663	-0.292645	0.232857	0.815872	1	no
Slco6d1	chr1:100317700-100405957	GF_Ileum	CV_Ileum	0	0	0	0	1	1	no
Cntnap5b	chr1:101669341-102382519	GF_Ileum	CV_Ileum	0	0	0	0	1	1	no
Gm20268	chr1:103052344-103071779	GF_Ileum	CV_Ileum	0	0	0	0	1	1	no
Cdh20	chr1:106665395-106910309	GF_Ileum	CV_Ileum	0.487655	0.403616	-0.272878	0.037636	0.969978	0.999999	no
2310035C23Rik	chr1:107560404-107651763	GF_Ileum	CV_Ileum	12.0244	14.5988	0.279883	-0.616862	0.537326	0.970628	no
Tnfrsf11a	chr1:107677284-107753002	GF_Ileum	CV_Ileum	13.4837	13.2021	-0.0304526	0.0648871	0.948264	0.999999	no
-	chr1:107760313-107774872	GF_Ileum	CV_Ileum	0.0740274	0.180924	1.28925	-0.87471	0.381732	1	no
Zcchc2	chr1:107876084-107930954	GF_Ileum	CV_Ileum	3.17339	2.87529	-0.142318	0.26912	0.787837	0.999999	no
Phlpp1	chr1:108068445-108290822	GF_Ileum	CV_Ileum	1.88213	1.34396	-0.485881	0.951148	0.341529	0.839744	no
Serpinb5	chr1:108757713-108779925	GF_Ileum	CV_Ileum	2.60483	2.61279	0.00440466	-0.00737986	0.994112	0.999999	no
Serpinb12	chr1:108831025-108853657	GF_Ileum	CV_Ileum	0	0	0	0	1	1	no
Serpinb13	chr1:108877560-108897772	GF_Ileum	CV_Ileum	0	0	0	0	1	1	no
Serpinb11	chr1:109258890-109277052	GF_Ileum	CV_Ileum	0	0	0	0	1	1	no
Serpinb7	chr1:109319265-109349266	GF_Ileum	CV_Ileum	0	0	0	0	1	1	no
Serpinb2	chr1:109407999-109422177	GF_Ileum	CV_Ileum	0	0	0	0	1	1	no
Serpinb10-ps	chr1:109425579-109445848	GF_Ileum	CV_Ileum	0	0	0	0	1	1	no
Serpinb8	chr1:109486582-109505555	GF_Ileum	CV_Ileum	0.0124402	0.00748423	-0.733089	0.254222	0.799324	1	no
Cdh7	chr1:111880313-112035578	GF_Ileum	CV_Ileum	0	0	0	0	1	1	no
Cntnap5a	chr1:117581713-118477251	GF_Ileum	CV_Ileum	0.00321298	0.00234827	-0.452312	0.123714	0.901542	1	no
Mki67ip	chr1:120218419-120230408	GF_Ileum	CV_Ileum	7.31039	6.09535	-0.262239	0.538828	0.590006	0.992907	no
Clasp1	chr1:120285634-120508173	GF_Ileum	CV_Ileum	3.84913	3.82359	-0.00960216	0.0194663	0.984469	0.999999	no
Tcfcp2l1	chr1:120524521-120581746	GF_Ileum	CV_Ileum	9.50415	12.6395	0.41131	-0.751411	0.452405	0.92747	no
Tmem185b	chr1:121416676-121434161	GF_Ileum	CV_Ileum	5.00986	6.3691	0.346321	-0.542728	0.587317	0.991978	no
Sctr	chr1:121903556-121970609	GF_Ileum	CV_Ileum	0.0496369	0.00506282	-3.2934	0.25789	0.796492	1	no
Sctr	chr1:121903556-121970609	GF_Ileum	CV_Ileum	1.72449	0	-1.79769e+308	-1.79769e+308	0.427806	0.910853	no
3110009E18Rik	chr1:122017763-122086341	GF_Ileum	CV_Ileum	1.11308	1.09813	-0.0195104	0.0192503	0.984641	0.999999	no
C1ql2	chr1:122237158-122239751	GF_Ileum	CV_Ileum	0	0	0	0	1	1	no
En1	chr1:122499063-122504568	GF_Ileum	CV_Ileum	0	0	0	0	1	1	no
B230209K01Rik	chr1:122983981-123017552	GF_Ileum	CV_Ileum	0	0	0	0	1	1	no
Ccdc93	chr1:123327643-123403037	GF_Ileum	CV_Ileum	13.7308	13.1574	-0.0615316	0.13116	0.895649	0.999999	no
Slc35f5	chr1:127457036-127492325	GF_Ileum	CV_Ileum	73.9511	71.3386	-0.0518881	0.11401	0.90923	0.999999	no
Gpr39	chr1:127573540-127808791	GF_Ileum	CV_Ileum	2.29497	1.00143	-1.19641	1.72429	0.0846557	0.404602	no
Mgat5	chr1:129101468-129384919	GF_Ileum	CV_Ileum	18.8978	15.9471	-0.244918	0.515457	0.606234	0.997812	no
Acmsd	chr1:129625989-129664141	GF_Ileum	CV_Ileum	0.0452637	0.0475481	0.0710337	-0.0471234	0.962415	1	no
Ccnt2	chr1:129670676-129704677	GF_Ileum	CV_Ileum	12.3194	13.9337	0.177649	-0.341773	0.732522	0.999999	no
Rab3gap1	chr1:129765349-129840453	GF_Ileum	CV_Ileum	9.85279	10.0651	0.0307639	-0.069868	0.944299	0.999999	no
R3hdm1	chr1:129999879-130134318	GF_Ileum	CV_Ileum	9.61231	7.92043	-0.279304	0.53921	0.589742	0.992732	no
Mir128-1	chr1:129999879-130134318	GF_Ileum	CV_Ileum	0	0	0	0	1	1	no
Ubxn4	chr1:130140497-130175954	GF_Ileum	CV_Ileum	19.2935	16.0486	-0.265664	0.588845	0.555965	0.979271	no
Thsd7b	chr1:131169880-132115855	GF_Ileum	CV_Ileum	0	0	0	0	1	1	no
Yod1	chr1:132585619-132625830	GF_Ileum	CV_Ileum	2.29507	3.49549	0.606952	-0.366621	0.713901	0.999999	no
AA986860	chr1:132628552-132660945	GF_Ileum	CV_Ileum	64.589	57.9907	-0.155468	0.311789	0.755201	0.999999	no
Fcamr	chr1:132697478-132717568	GF_Ileum	CV_Ileum	0.167648	0.562208	1.74567	-0.417112	0.676596	0.999999	no
Pigr	chr1:132723260-132748826	GF_Ileum	CV_Ileum	380.845	535.48	0.491629	-0.721066	0.470869	0.939003	no
Faim3	chr1:132762353-132777367	GF_Ileum	CV_Ileum	0	0.0166771	1.79769e+308	1.79769e+308	0.190018	1	no
Il10	chr1:132916421-132921547	GF_Ileum	CV_Ileum	0	0.0194702	1.79769e+308	1.79769e+308	0.190018	1	no
Eif2d	chr1:133049783-133141755	GF_Ileum	CV_Ileum	13.8434	11.0369	-0.326868	0.63731	0.523923	0.964465	no
Rassf5	chr1:133049783-133141755	GF_Ileum	CV_Ileum	0.586846	0.366698	-0.67839	0.422911	0.67236	0.999999	no
Fam72a	chr1:133424565-133436449	GF_Ileum	CV_Ileum	0.429747	0.224104	-0.939322	1.15311	0.248864	0.730673	no
Avpr1b	chr1:133495690-133508577	GF_Ileum	CV_Ileum	0.0595891	0.0473696	-0.331088	0.312248	0.754852	1	no
Ctse	chr1:133534890-133572084	GF_Ileum	CV_Ileum	0.00619296	0.139242	4.49082	-1.69054	0.0909255	1	no
5430435G22Rik	chr1:133585271-133610041	GF_Ileum	CV_Ileum	0	0.00375416	1.79769e+308	1.79769e+308	0.287998	1	no
Slc26a9	chr1:133640598-133666982	GF_Ileum	CV_Ileum	0	0	0	0	1	1	no
Pm20d1	chr1:133693971-133714692	GF_Ileum	CV_Ileum	31.263	28.7891	-0.118933	0.278848	0.780362	0.999999	no
Slc41a1	chr1:133724588-133745440	GF_Ileum	CV_Ileum	1.70335	0.989664	-0.783361	1.39593	0.162735	0.588866	no
Rab7l1	chr1:133763820-133769838	GF_Ileum	CV_Ileum	3.44853	3.72154	0.109917	-0.159371	0.873377	0.999999	no
Nucks1	chr1:133807034-133832898	GF_Ileum	CV_Ileum	9.95231	7.7522	-0.360425	0.79392	0.427242	0.910554	no
Slc45a3	chr1:133859542-133879770	GF_Ileum	CV_Ileum	0.221231	0.157177	-0.493162	0.441526	0.658832	1	no
Elk4	chr1:133904181-133964639	GF_Ileum	CV_Ileum	13.7862	14.3703	0.0598594	-0.0948024	0.924472	0.999999	no
Lemd1	chr1:134088012-134153959	GF_Ileum	CV_Ileum	0	0	0	0	1	1	no
Mir135b	chr1:134088012-134153959	GF_Ileum	CV_Ileum	0	0	0	0	1	1	no
Klhdc8a	chr1:134195090-134203934	GF_Ileum	CV_Ileum	0.931258	0.512965	-0.860321	1.25947	0.20786	0.669821	no
Nuak2	chr1:134212701-134230109	GF_Ileum	CV_Ileum	37.0699	35.1518	-0.0766465	0.160625	0.872389	0.999999	no
Dstyk	chr1:134314029-134363751	GF_Ileum	CV_Ileum	1.8943	2.29563	0.277225	-0.527092	0.59813	0.995465	no
Rbbp5,Tmem81	chr1:134373943-134405216	GF_Ileum	CV_Ileum	8.04847	7.61535	-0.0798057	0.15464	0.877105	0.999999	no
Lrrn2	chr1:134776931-134836582	GF_Ileum	CV_Ileum	0.00732097	0.00319336	-1.19696	0.36982	0.711517	1	no
Pik3c2b	chr1:134942251-135005288	GF_Ileum	CV_Ileum	24.5284	20.4464	-0.262607	0.48857	0.625146	0.999999	no
Ppp1r15b	chr1:135027603-135036377	GF_Ileum	CV_Ileum	45.9871	46.51	0.0163135	-0.0337064	0.973111	0.999999	no
Plekha6	chr1:135060302-135200032	GF_Ileum	CV_Ileum	24.0215	23.6756	-0.0209237	0.0345006	0.972478	0.999999	no
Golt1a,Kiss1	chr1:135206025-135226299	GF_Ileum	CV_Ileum	95.1547	74.4577	-0.353855	0.653415	0.513488	0.959227	no
Ren1,Ren2	chr1:135247142-135256900	GF_Ileum	CV_Ileum	0.00968635	0.00736461	-0.395344	0.042976	0.965721	1	no
Etnk2	chr1:135260148-135276939	GF_Ileum	CV_Ileum	0.375402	0.275138	-0.44828	0.426876	0.66947	1	no
Fmod	chr1:135934091-135944854	GF_Ileum	CV_Ileum	0	0.00315806	1.79769e+308	1.79769e+308	0.293259	1	no
Btg2	chr1:135971441-135983899	GF_Ileum	CV_Ileum	2.52554	0.0387325	-6.02691	0.857495	0.391171	0.884228	no
Chit1	chr1:136007818-136048013	GF_Ileum	CV_Ileum	0	0	0	0	1	1	no
Chi3l1	chr1:136078980-136086608	GF_Ileum	CV_Ileum	0.0478036	0.0255452	-0.904066	0.480291	0.631021	1	no
Mybph	chr1:136090024-136132008	GF_Ileum	CV_Ileum	0	0	0	0	1	1	no
Myog	chr1:136186580-136189125	GF_Ileum	CV_Ileum	0	0	0	0	1	1	no
Ppfia4	chr1:136192617-136229505	GF_Ileum	CV_Ileum	0.0779397	0	-1.79769e+308	-1.79769e+308	0.480232	1	no
4933406M09Rik	chr1:136282516-136287560	GF_Ileum	CV_Ileum	0	0	0	0	1	1	no
Cyb5r1	chr1:136302225-136308316	GF_Ileum	CV_Ileum	8.32416	5.93146	-0.488919	0.849374	0.395673	0.887692	no
Adipor1	chr1:136312043-136328918	GF_Ileum	CV_Ileum	86.3625	77.8071	-0.150505	0.326579	0.743986	0.999999	no
Klhl12	chr1:136352105-136387591	GF_Ileum	CV_Ileum	4.27827	4.3236	0.0152057	-0.0302037	0.975905	0.999999	no
Rabif	chr1:136391168-136405516	GF_Ileum	CV_Ileum	15.7151	14.4667	-0.119418	0.250347	0.802319	0.999999	no
Kdm5b	chr1:136456754-136529502	GF_Ileum	CV_Ileum	7.46226	6.80616	-0.132772	0.294745	0.768189	0.999999	no
Syt2	chr1:136543257-136649724	GF_Ileum	CV_Ileum	1.1239	0.78796	-0.512323	0.955068	0.339543	0.837658	no
Ube2t	chr1:136859153-136870714	GF_Ileum	CV_Ileum	2.42815	2.05791	-0.238675	0.247222	0.804736	0.999999	no
Ptpn7	chr1:137029301-137041897	GF_Ileum	CV_Ileum	0.0441473	0.11002	1.31737	-1.15971	0.246167	1	no
Arl8a	chr1:137043392-137052847	GF_Ileum	CV_Ileum	46.9804	41.419	-0.181768	0.395951	0.692141	0.999999	no
-	chr1:137077803-137081574	GF_Ileum	CV_Ileum	0.507075	0.270874	-0.904576	1.19532	0.231964	0.707005	no
Lmod1	chr1:137221389-137264642	GF_Ileum	CV_Ileum	0.0224006	0	-1.79769e+308	-1.79769e+308	0.103846	1	no
Csrp1	chr1:137625773-137648806	GF_Ileum	CV_Ileum	10.5677	6.49805	-0.70158	1.4608	0.14407	0.551325	no
Phlda3	chr1:137662661-137665711	GF_Ileum	CV_Ileum	0.20724	0.249944	0.270303	-0.282981	0.777191	1	no
Tnni1	chr1:137695997-137707566	GF_Ileum	CV_Ileum	1.00272	0.638196	-0.651847	0.867194	0.385836	0.879555	no
Lad1	chr1:137715174-137729918	GF_Ileum	CV_Ileum	139.055	114.065	-0.285801	0.491887	0.622799	0.999999	no
Tnnt2	chr1:137732794-137748838	GF_Ileum	CV_Ileum	0.0508699	0.655815	3.68841	-1.75423	0.0793908	0.388388	no
Tmem9	chr1:137904795-137931607	GF_Ileum	CV_Ileum	3.44407	2.33356	-0.561581	0.902525	0.366778	0.862904	no
Cacna1s	chr1:137949477-138016399	GF_Ileum	CV_Ileum	0.00598912	0.00560127	-0.0965899	0.0285168	0.97725	1	no
Kif21b	chr1:138027955-138077026	GF_Ileum	CV_Ileum	10.5256	11.8759	0.174132	-0.371538	0.710237	0.999999	no
-	chr1:138077956-138105579	GF_Ileum	CV_Ileum	0.539351	0.41193	-0.388826	0.105701	0.91582	0.999999	no
Ddx59	chr1:138308492-138336797	GF_Ileum	CV_Ileum	0.755759	0.725652	-0.0586498	0.0802921	0.936005	0.999999	no
Kif14	chr1:138362951-138428088	GF_Ileum	CV_Ileum	0.70929	0.627291	-0.17724	0.293463	0.769168	0.999999	no
Zfp281	chr1:138521477-138553536	GF_Ileum	CV_Ileum	1.83006	2.09356	0.19407	-0.341343	0.732846	0.999999	no
Gm16880	chr1:138592787-138622305	GF_Ileum	CV_Ileum	0	0	0	0	1	1	no
-	chr1:138890086-138914183	GF_Ileum	CV_Ileum	0	0	0	0	1	1	no
Mir181a-1	chr1:139863031-139863118	GF_Ileum	CV_Ileum	0	0	0	0	1	1	no
Mir181b-1	chr1:139863215-139863295	GF_Ileum	CV_Ileum	0	0	0	0	1	1	no
Atp6v1g3	chr1:140170314-140186039	GF_Ileum	CV_Ileum	0	0	0	0	1	1	no
Dennd1b	chr1:140856752-141072872	GF_Ileum	CV_Ileum	6.42762	7.7875	0.276875	-0.571898	0.567391	0.98419	no
4933436E23Rik	chr1:141276028-141299429	GF_Ileum	CV_Ileum	0	0	0	0	1	1	no
Zbtb41	chr1:141318774-141349700	GF_Ileum	CV_Ileum	2.2922	2.17394	-0.0764161	0.150233	0.88058	0.999999	no
Aspm	chr1:141351349-141390665	GF_Ileum	CV_Ileum	1.12121	1.11701	-0.00540556	0.0108196	0.991367	0.999999	no
F13b	chr1:141398283-141420333	GF_Ileum	CV_Ileum	0	0.00494043	1.79769e+308	1.79769e+308	0.267392	1	no
Kcnt2	chr1:142142833-142552979	GF_Ileum	CV_Ileum	0	0.00431998	1.79769e+308	1.79769e+308	0.271406	1	no
-	chr1:145402579-145422536	GF_Ileum	CV_Ileum	0	0	0	0	1	1	no
B3galt2	chr1:145445642-145549954	GF_Ileum	CV_Ileum	0.0115516	0.00822945	-0.489221	0.0342759	0.972657	1	no
Glrx2	chr1:145586478-145596808	GF_Ileum	CV_Ileum	5.47709	5.18691	-0.0785333	0.146114	0.883832	0.999999	no
Uchl5	chr1:145624394-145654596	GF_Ileum	CV_Ileum	12.0572	12.2226	0.019662	-0.0385361	0.96926	0.999999	no
Fam5c	chr1:148342795-148749602	GF_Ileum	CV_Ileum	0	0	0	0	1	1	no
Ptgs2	chr1:151947253-151955142	GF_Ileum	CV_Ileum	0.00302639	0.0476861	3.9779	-1.48603	0.137272	1	no
Pdc	chr1:152166546-152193901	GF_Ileum	CV_Ileum	0	0	0	0	1	1	no
Tpr	chr1:152208440-152313295	GF_Ileum	CV_Ileum	12.5587	11.2275	-0.161648	0.335812	0.737013	0.999999	no
C730036E19Rik	chr1:152985163-152991225	GF_Ileum	CV_Ileum	0.0384931	0.15588	2.01776	-1.40421	0.160255	1	no
Ivns1abp	chr1:153191001-153211637	GF_Ileum	CV_Ileum	144.488	143.072	-0.0142124	0.0228588	0.981763	0.999999	no
1190005F20Rik	chr1:153275777-153305313	GF_Ileum	CV_Ileum	21.6812	20.4125	-0.0869921	0.163014	0.870507	0.999999	no
Fam129a	chr1:153418502-153569085	GF_Ileum	CV_Ileum	0.338539	0.495964	0.550912	-0.822509	0.410787	0.898647	no
Edem3	chr1:153602480-153669520	GF_Ileum	CV_Ileum	15.9551	16.5104	0.0493568	-0.113276	0.909812	0.999999	no
Glt25d2	chr1:154246996-154357825	GF_Ileum	CV_Ileum	0.00309596	0	-1.79769e+308	-1.79769e+308	0.288813	1	no
Apobec4	chr1:154597680-154604674	GF_Ileum	CV_Ileum	0.0086767	0	-1.79769e+308	-1.79769e+308	0.288813	1	no
Arpc5	chr1:154613671-154622710	GF_Ileum	CV_Ileum	131.474	156.52	0.25156	-0.543429	0.586835	0.991903	no
Ncf2	chr1:154654821-154750304	GF_Ileum	CV_Ileum	3.1371	2.63055	-0.254065	0.233935	0.815036	0.999999	no
Nmnat2	chr1:154802230-154966391	GF_Ileum	CV_Ileum	0.0585033	0.0731977	0.32328	-0.316675	0.75149	1	no
1700012A16Rik	chr1:155272338-155299704	GF_Ileum	CV_Ileum	0.0128853	0.0100941	-0.352206	0.132281	0.894762	1	no
Rgs8	chr1:155500166-155544795	GF_Ileum	CV_Ileum	0.00639872	0.00460791	-0.473669	0.204167	0.838223	1	no
Rgs16	chr1:155587482-155592598	GF_Ileum	CV_Ileum	0.258963	0.157637	-0.716136	0.812423	0.416549	1	no
Rnasel	chr1:155596555-155616858	GF_Ileum	CV_Ileum	92.2275	82.4136	-0.162314	0.279062	0.780197	0.999999	no
Gm5531	chr1:155721474-155724001	GF_Ileum	CV_Ileum	0.0574653	0.0869512	0.597513	-0.422552	0.672622	1	no
Teddm1	chr1:155738775-155740190	GF_Ileum	CV_Ileum	0	0.00717184	1.79769e+308	1.79769e+308	0.287998	1	no
Glul	chr1:155747074-155756844	GF_Ileum	CV_Ileum	24.4123	16.8006	-0.5391	1.24181	0.214306	0.679688	no
Zfp648	chr1:156048316-156052804	GF_Ileum	CV_Ileum	0	0.00641762	1.79769e+308	1.79769e+308	0.267392	1	no
Stx6	chr1:157005832-157050647	GF_Ileum	CV_Ileum	7.80738	5.89784	-0.404651	0.870045	0.384276	0.878356	no
Xpr1	chr1:157122738-157264574	GF_Ileum	CV_Ileum	2.13931	0.00251446	-9.73269	0.420612	0.674039	0.999999	no
Acbd6	chr1:157394821-157534363	GF_Ileum	CV_Ileum	10.696	7.87694	-0.441368	0.697572	0.485445	0.945805	no
Tor1aip2	chr1:157851728-157916311	GF_Ileum	CV_Ileum	49.5508	74.9747	0	0	1	1	no
Nphs2	chr1:158240865-158258166	GF_Ileum	CV_Ileum	0.0115791	0	-1.79769e+308	-1.79769e+308	0.218314	1	no
Abl2	chr1:158488917-158579909	GF_Ileum	CV_Ileum	1.35505	1.36318	0.00863189	-0.0165085	0.986829	0.999999	no
Angptl1	chr1:158734219-158872202	GF_Ileum	CV_Ileum	0.0537946	0.0279295	-0.945674	0.0952774	0.924095	1	no
2810025M15Rik	chr1:159065313-159350367	GF_Ileum	CV_Ileum	1.65197	1.52125	-0.118934	0.0982463	0.921737	0.999999	no
BC026585	chr1:159382672-159418888	GF_Ileum	CV_Ileum	1.63484	1.31174	-0.317675	0.350584	0.7259	0.999999	no
-	chr1:159421313-159422711	GF_Ileum	CV_Ileum	0.0116665	0.07033	2.59177	-0.945174	0.34457	1	no
Sec16b	chr1:159436926-159498555	GF_Ileum	CV_Ileum	20.9364	19.465	-0.10513	0.216379	0.828692	0.999999	no
Astn1	chr1:160292434-160621917	GF_Ileum	CV_Ileum	0	0	0	0	1	1	no
Mir488	chr1:160292434-160621917	GF_Ileum	CV_Ileum	0	0	0	0	1	1	no
Rfwd2	chr1:161162149-161281055	GF_Ileum	CV_Ileum	20.2777	23.217	0.195281	-0.3588	0.719745	0.999999	no
Scarna3a	chr1:161162149-161281055	GF_Ileum	CV_Ileum	0	0	0	0	1	1	no
-	chr1:161281414-161284956	GF_Ileum	CV_Ileum	0.301443	0.310857	0.0443657	-0.0590529	0.95291	0.999999	no
Tnr	chr1:161453899-161855053	GF_Ileum	CV_Ileum	0.0101079	0.00750008	-0.430513	0.235172	0.814075	1	no
4930523C07Rik	chr1:161974510-162008770	GF_Ileum	CV_Ileum	0.347011	0.279749	-0.310848	0.315304	0.752531	0.999999	no
Mrps14	chr1:162125368-162131437	GF_Ileum	CV_Ileum	11.623	9.75102	-0.253362	0.43055	0.666796	0.999999	no
Rc3h1	chr1:162836541-162905107	GF_Ileum	CV_Ileum	5.55771	5.69966	0.0363831	-0.0849998	0.932262	0.999999	no
Serpinc1	chr1:162908736-162933145	GF_Ileum	CV_Ileum	0.221886	0.133648	-0.731381	0.802953	0.422002	1	no
Gas5,Mir5117	chr1:162933326-162968805	GF_Ileum	CV_Ileum	53.04	53.1017	0.00167492	-0.00214808	0.998286	0.999999	no
Snord47	chr1:162933326-162968805	GF_Ileum	CV_Ileum	0	2880.72	1.79769e+308	1.79769e+308	0.426785	0.910227	no
Cenpl	chr1:162968942-163016646	GF_Ileum	CV_Ileum	6.23453	6.43344	0.0453105	-0.0552783	0.955917	0.999999	no
Ankrd45	chr1:163072842-163100638	GF_Ileum	CV_Ileum	0	0.00753235	1.79769e+308	1.79769e+308	0.164304	1	no
Tnfsf4	chr1:163325568-163348337	GF_Ileum	CV_Ileum	0	0	0	0	1	1	no
Tnfsf18	chr1:163424787-163435421	GF_Ileum	CV_Ileum	0	0	0	0	1	1	no
Pigc	chr1:163872219-163909767	GF_Ileum	CV_Ileum	9.2721	7.98028	-0.216457	0.433853	0.664395	0.999999	no
2810442N19Rik	chr1:163917432-164408165	GF_Ileum	CV_Ileum	0	0.0611736	1.79769e+308	1.79769e+308	0.118132	1	no
Dnm3os	chr1:163917432-164408165	GF_Ileum	CV_Ileum	0	0	0	0	1	1	no
Vamp4	chr1:164500714-164529209	GF_Ileum	CV_Ileum	4.28548	5.15983	0.267868	-0.448724	0.653631	0.999999	no
Myoc	chr1:164569280-164588350	GF_Ileum	CV_Ileum	0	0.0103619	1.79769e+308	1.79769e+308	0.242575	1	no
Kifap3	chr1:165709741-165847530	GF_Ileum	CV_Ileum	1.75534	1.59478	-0.138401	0.233043	0.815728	0.999999	no
Scyl3	chr1:165859859-165924912	GF_Ileum	CV_Ileum	9.17759	8.91909	-0.0412187	0.0736321	0.941303	0.999999	no
2810422O20Rik	chr1:165925010-165927374	GF_Ileum	CV_Ileum	1.52061	1.20662	-0.333673	0.421184	0.673621	0.999999	no
Sele	chr1:165978364-165987808	GF_Ileum	CV_Ileum	0	0	0	0	1	1	no
Sell	chr1:165992206-166010916	GF_Ileum	CV_Ileum	0.0177269	0.0601884	1.76355	-0.63766	0.523695	1	no
Selp	chr1:166045394-166150405	GF_Ileum	CV_Ileum	0	0	0	0	1	1	no
F5	chr1:166045394-166150405	GF_Ileum	CV_Ileum	0.0182571	0.0363093	0.991881	-0.716564	0.473643	1	no
Slc19a2	chr1:166179185-166195605	GF_Ileum	CV_Ileum	4.66722	4.64659	-0.00639097	0.0119225	0.990487	0.999999	no
4930455F23Rik	chr1:166205728-166217978	GF_Ileum	CV_Ileum	3.60986	3.27525	-0.140337	0.238403	0.811569	0.999999	no
Nme7	chr1:166237805-166388486	GF_Ileum	CV_Ileum	22.3171	21.823	-0.0322961	0.00144246	0.998849	0.999999	no
Dpt	chr1:166726862-166754397	GF_Ileum	CV_Ileum	0.0412911	0.0435483	0.0767869	-0.0423108	0.966251	1	no
LOC433374	chr1:166788637-166801657	GF_Ileum	CV_Ileum	0.278757	0.375614	0.430244	-0.534061	0.5933	0.993826	no
Gpr161	chr1:167225896-167251982	GF_Ileum	CV_Ileum	0.057063	0.0207649	-1.45841	0.866754	0.386077	1	no
Brp44	chr1:167390987-167411345	GF_Ileum	CV_Ileum	63.0043	67.5067	0.099581	-0.222942	0.823581	0.999999	no
Adcy10	chr1:167415313-167506904	GF_Ileum	CV_Ileum	0.00477098	0.00388928	-0.294782	0.111297	0.911381	1	no
Creg1	chr1:167693910-167705441	GF_Ileum	CV_Ileum	26.3951	25.4591	-0.0520893	0.116834	0.906992	0.999999	no
Cd247	chr1:167718811-167932765	GF_Ileum	CV_Ileum	0.547604	2.5708	2.23101	-0.431972	0.665762	0.999999	no
Gpa33	chr1:168060590-168096641	GF_Ileum	CV_Ileum	310.68	260.714	-0.252959	0.500167	0.616957	0.999999	no
Ildr2	chr1:168184269-168246963	GF_Ileum	CV_Ileum	0.0261274	0.0162219	-0.687625	0.580259	0.56174	1	no
Tada1	chr1:168309297-168339959	GF_Ileum	CV_Ileum	10.9534	8.35503	-0.390659	0.690822	0.489678	0.947949	no
Fam78b	chr1:168931547-169021433	GF_Ileum	CV_Ileum	4.41e-07	0	-1.79769e+308	-1.79769e+308	0.499988	1	no
Tmco1	chr1:169238319-169264109	GF_Ileum	CV_Ileum	17.7581	17.5136	-0.0199993	0.0296063	0.976381	0.999999	no
Aldh9a1	chr1:169280121-169298661	GF_Ileum	CV_Ileum	227.61	201.412	-0.176412	0.338909	0.734678	0.999999	no
Rxrg	chr1:169528492-169569754	GF_Ileum	CV_Ileum	0	0	0	0	1	1	no
Lmx1a	chr1:169619688-169778864	GF_Ileum	CV_Ileum	0.157997	0.126903	-0.316179	0.367635	0.713146	1	no
Rgs5	chr1:171585631-171623657	GF_Ileum	CV_Ileum	0.0295147	0	-1.79769e+308	-1.79769e+308	0.185921	1	no
1700084C01Rik	chr1:171859069-171864784	GF_Ileum	CV_Ileum	0.160231	0.17641	0.138783	-0.127402	0.898622	1	no
3110045C21Rik	chr1:171899529-172019075	GF_Ileum	CV_Ileum	0.9514	0.837308	-0.184295	0.170707	0.864454	0.999999	no
Sh2d1b2	chr1:172163001-172181718	GF_Ileum	CV_Ileum	0	0.0451724	1.79769e+308	1.79769e+308	0.284745	1	no
Sh2d1b1	chr1:172207454-172215793	GF_Ileum	CV_Ileum	0.0288034	0.126991	2.14041	-1.13414	0.256737	1	no
1700015E13Rik	chr1:172225475-172519980	GF_Ileum	CV_Ileum	0.720263	1.1558	0.682297	-0.551804	0.581083	0.989451	no
Olfml2b	chr1:172574662-172612920	GF_Ileum	CV_Ileum	0.00954564	0.021113	1.14522	-0.545496	0.585412	1	no
Atf6	chr1:172631453-172798090	GF_Ileum	CV_Ileum	2.71769	0	0	0	1	1	no
-	chr1:172909767-172917963	GF_Ileum	CV_Ileum	2.62767	2.7309	0.0555938	-0.0757646	0.939606	0.999999	no
Fcgr4	chr1:172949056-172959892	GF_Ileum	CV_Ileum	0.0312691	0	-1.79769e+308	-1.79769e+308	0.218314	1	no
1700009P17Rik	chr1:173051791-173057098	GF_Ileum	CV_Ileum	0.665393	0.645931	-0.0428262	0.0530585	0.957685	0.999999	no
Mpz	chr1:173080843-173091254	GF_Ileum	CV_Ileum	0.0497362	0.0101865	-2.28765	1.05172	0.292928	1	no
Nr1i3	chr1:173144100-173152989	GF_Ileum	CV_Ileum	5.11919	3.90389	-0.391004	0.361303	0.717873	0.999999	no
Apoa2	chr1:173153459-173156510	GF_Ileum	CV_Ileum	1.06422	0.40335	-1.39969	1.05557	0.291165	0.784321	no
Adamts4	chr1:173180552-173190053	GF_Ileum	CV_Ileum	0.00343588	0.00502361	0.548045	-0.172964	0.86268	1	no
B4galt3	chr1:173200458-173211475	GF_Ileum	CV_Ileum	19.6322	16.9268	-0.213909	0.333355	0.738866	0.999999	no
Dedd	chr1:173259275-173275787	GF_Ileum	CV_Ileum	13.2211	11.24	-0.234196	0.356919	0.721153	0.999999	no
Pfdn2	chr1:173275829-173288301	GF_Ileum	CV_Ileum	22.2698	17.7967	-0.323479	0.640849	0.521621	0.963273	no
Pvrl4	chr1:173299085-173318418	GF_Ileum	CV_Ileum	0.18321	0.214631	0.228359	-0.17635	0.860019	1	no
Arhgap30	chr1:173319090-173348873	GF_Ileum	CV_Ileum	0.138478	0.323416	1.22373	-0.0415634	0.966847	0.999999	no
Usf1	chr1:173319090-173348873	GF_Ileum	CV_Ileum	0.317055	0.80929	1.35192	-0.149792	0.880929	0.999999	no
Usf1	chr1:173319090-173348873	GF_Ileum	CV_Ileum	16.889	17.1645	0.0233502	-0.052524	0.958111	0.999999	no
Tstd1	chr1:173349163-173350483	GF_Ileum	CV_Ileum	124.032	111.77	-0.150188	0.349461	0.726743	0.999999	no
F11r	chr1:173367691-173394724	GF_Ileum	CV_Ileum	123.357	102.513	-0.267032	0.586553	0.557504	0.979913	no
Refbp2	chr1:173433608-173434881	GF_Ileum	CV_Ileum	3.4029	2.97596	-0.193408	0.332991	0.739141	0.999999	no
Cd244	chr1:173475510-173517589	GF_Ileum	CV_Ileum	0.722928	0.702162	-0.0420493	0.0539723	0.956957	0.999999	no
Cd48	chr1:173612185-173635388	GF_Ileum	CV_Ileum	0.150234	0.531861	1.82383	-1.46806	0.142088	0.547063	no
Slamf1	chr1:173697262-173731315	GF_Ileum	CV_Ileum	0	0.0148407	1.79769e+308	1.79769e+308	0.124978	1	no
Cd84	chr1:173769827-173820849	GF_Ileum	CV_Ileum	0.484124	0.709065	0.550541	-0.820931	0.411685	0.899292	no
Slamf6	chr1:173847667-173873999	GF_Ileum	CV_Ileum	0.00530722	0.032671	2.62198	-0.947866	0.343198	1	no
Copa	chr1:173996143-174052545	GF_Ileum	CV_Ileum	119.469	80.1363	-0.576111	0.762713	0.445634	0.923193	no
Pex19	chr1:174056885-174066628	GF_Ileum	CV_Ileum	45.0449	39.2918	-0.197135	0.332816	0.739273	0.999999	no
Dcaf8	chr1:174078145-174136912	GF_Ileum	CV_Ileum	18.5201	17.3037	-0.0980096	0.199224	0.842087	0.999999	no
Dcaf8	chr1:174078145-174136912	GF_Ileum	CV_Ileum	0.873447	0	-1.79769e+308	-1.79769e+308	0.464883	0.935533	no
Igsf8	chr1:174241907-174249972	GF_Ileum	CV_Ileum	10.316	7.62913	-0.435293	0.837585	0.402264	0.892428	no
Kcnj10	chr1:174271340-174304216	GF_Ileum	CV_Ileum	0.00780854	0.0139608	0.838261	-0.45036	0.652451	1	no
Pigm	chr1:174306661-174314230	GF_Ileum	CV_Ileum	6.5815	6.80011	0.0471414	-0.109374	0.912906	0.999999	no
Slamf9	chr1:174405490-174408540	GF_Ileum	CV_Ileum	0.389174	0.336117	-0.211448	0.223655	0.823026	0.999999	no
Igsf9	chr1:174411816-174437506	GF_Ileum	CV_Ileum	115.136	109.062	-0.0781894	0.0868188	0.930816	0.999999	no
Tagln2	chr1:174411816-174437506	GF_Ileum	CV_Ileum	296.192	234.613	-0.33625	0.368454	0.712535	0.999999	no
Ccdc19	chr1:174451260-174480937	GF_Ileum	CV_Ileum	0.297421	0.354436	0.25302	-0.0739979	0.941012	0.999999	no
Vsig8	chr1:174486068-174493848	GF_Ileum	CV_Ileum	0.129149	0.0636793	-1.02013	0.739091	0.459852	1	no
Crp	chr1:174628186-174630097	GF_Ileum	CV_Ileum	0.0158398	0.00581908	-1.44469	0.43521	0.66341	1	no
Olfr16	chr1:174886898-174887948	GF_Ileum	CV_Ileum	0	0	0	0	1	1	no
Olfr218	chr1:175133488-175134430	GF_Ileum	CV_Ileum	0	0	0	0	1	1	no
Olfr1404	chr1:175145737-175146771	GF_Ileum	CV_Ileum	0	0	0	0	1	1	no
Olfr418-ps1	chr1:175200277-175201268	GF_Ileum	CV_Ileum	0	0.0110061	1.79769e+308	1.79769e+308	0.287998	1	no
Aim2	chr1:175349140-175396274	GF_Ileum	CV_Ileum	3.75511	5.21937	0.47502	-0.615107	0.538484	0.971179	no
Pyhin1	chr1:175560989-175578059	GF_Ileum	CV_Ileum	0.0209525	0.10666	2.34782	-1.52767	0.126594	1	no
Pydc3	chr1:175603810-175628523	GF_Ileum	CV_Ileum	0.176583	0.198201	0.16662	-0.198182	0.842902	1	no
Olfr433	chr1:175972063-175973067	GF_Ileum	CV_Ileum	0	0	0	0	1	1	no
Olfr432	chr1:175980505-175981444	GF_Ileum	CV_Ileum	0	0	0	0	1	1	no
Olfr430	chr1:175999430-176000384	GF_Ileum	CV_Ileum	0	0	0	0	1	1	no
Olfr429	chr1:176019168-176020111	GF_Ileum	CV_Ileum	0	0	0	0	1	1	no
Olfr426	chr1:176029590-176030541	GF_Ileum	CV_Ileum	0	0	0	0	1	1	no
Olfr424	chr1:176066876-176067824	GF_Ileum	CV_Ileum	0	0	0	0	1	1	no
Olfr421	chr1:176081611-176082661	GF_Ileum	CV_Ileum	0	0	0	0	1	1	no
Olfr420	chr1:176088852-176089898	GF_Ileum	CV_Ileum	0	0	0	0	1	1	no
Spna1	chr1:176102906-176178580	GF_Ileum	CV_Ileum	0.0043741	0.00184329	-1.2467	0.487372	0.625995	1	no
1810030J14Rik	chr1:176260648-176263008	GF_Ileum	CV_Ileum	7.05833	3.61575	-0.965031	1.57756	0.114666	0.483722	no
Olfr417	chr1:176299049-176299979	GF_Ileum	CV_Ileum	0	0	0	0	1	1	no
Olfr248	chr1:176321176-176322186	GF_Ileum	CV_Ileum	0	0	0	0	1	1	no
Olfr414	chr1:176360560-176361515	GF_Ileum	CV_Ileum	0	0	0	0	1	1	no
Olfr220	chr1:176378755-176379733	GF_Ileum	CV_Ileum	0	0	0	0	1	1	no
Fmn2	chr1:176431955-176752860	GF_Ileum	CV_Ileum	0.0297465	0.0352407	0.244522	-0.22386	0.822866	1	no
Kmo	chr1:177562323-177590984	GF_Ileum	CV_Ileum	0.0673535	0.133282	0.984656	-0.791441	0.428686	1	no
Wdr64	chr1:177628723-177745864	GF_Ileum	CV_Ileum	0	0	0	0	1	1	no
Exo1	chr1:177810831-177841692	GF_Ileum	CV_Ileum	0.766173	0.593836	-0.367607	0.531031	0.595397	0.994531	no
Sdccag8	chr1:178744942-179178999	GF_Ileum	CV_Ileum	5.56129	5.55848	-0.000729276	0.00113024	0.999098	0.999999	no
Zfp238	chr1:179372420-179380897	GF_Ileum	CV_Ileum	17.531	18.7286	0.0953374	-0.186328	0.852188	0.999999	no
-	chr1:179542904-179546843	GF_Ileum	CV_Ileum	0.0872721	0.221579	1.34423	-0.89686	0.369794	1	no
1700016C15Rik	chr1:179659944-179726640	GF_Ileum	CV_Ileum	7.8033	6.93378	-0.170441	0.0478802	0.961812	0.999999	no
Gm16432	chr1:179913732-180000858	GF_Ileum	CV_Ileum	0.626086	0.611692	-0.0335551	0.0136185	0.989134	0.999999	no
-	chr1:180028641-180034158	GF_Ileum	CV_Ileum	0	0.0614669	1.79769e+308	1.79769e+308	0.126505	1	no
Pppde1	chr1:180117547-180182728	GF_Ileum	CV_Ileum	10.082	9.29516	-0.117237	0.259019	0.79562	0.999999	no
Fam36a	chr1:180248484-180268012	GF_Ileum	CV_Ileum	58.4711	61.4848	0.0725071	-0.0303507	0.975787	0.999999	no
Efcab2	chr1:180335750-180415335	GF_Ileum	CV_Ileum	0.854093	1.00531	0.235175	-0.300849	0.763529	0.999999	no
Kif26b	chr1:180459255-180862988	GF_Ileum	CV_Ileum	0.133363	0.0859611	-0.633606	0.828394	0.407448	1	no
Cnst	chr1:181458186-181557617	GF_Ileum	CV_Ileum	13.4155	13.0093	-0.0443641	0.0886406	0.929368	0.999999	no
Sccpdh	chr1:181598361-181617315	GF_Ileum	CV_Ileum	19.3521	19.8617	0.0375012	-0.0849614	0.932292	0.999999	no
Cdc42bpa	chr1:181890118-182126151	GF_Ileum	CV_Ileum	3.12012	2.8741	-0.118493	0.164598	0.869261	0.999999	no
-	chr1:182186571-182195688	GF_Ileum	CV_Ileum	0.388456	0.447467	0.20403	-0.139595	0.88898	0.999999	no
Itpkb	chr1:182257099-182354925	GF_Ileum	CV_Ileum	0.75052	0.666841	-0.170548	0.249936	0.802636	0.999999	no
Parp1	chr1:182499072-182531385	GF_Ileum	CV_Ileum	7.42415	4.90262	-0.598672	1.23735	0.215958	0.682131	no
Lin9	chr1:182571464-182620818	GF_Ileum	CV_Ileum	2.17599	2.20426	0.0186208	-0.0229457	0.981694	0.999999	no
Acbd3	chr1:182655949-182689421	GF_Ileum	CV_Ileum	20.3144	19.6563	0	0	1	1	no
-	chr1:182707267-182721899	GF_Ileum	CV_Ileum	0.321331	0.419241	0.383721	-0.334662	0.73788	0.999999	no
BC031781	chr1:182781281-182798245	GF_Ileum	CV_Ileum	6.22246	5.50203	-0.177522	0.384568	0.700558	0.999999	no
Lefty2	chr1:182823249-182829233	GF_Ileum	CV_Ileum	0.000181558	0.0360387	7.63297	-0.565708	0.571592	1	no
Pycr2	chr1:182834399-182838219	GF_Ileum	CV_Ileum	6.16584	4.07587	-0.597188	1.05933	0.289449	0.782365	no
Lefty1	chr1:182850928-182868532	GF_Ileum	CV_Ileum	0.421721	0.451891	0.099688	-0.0867241	0.930891	0.999999	no
Tmem63a	chr1:182872594-182905235	GF_Ileum	CV_Ileum	13.7519	8.68636	-0.66281	1.46707	0.142356	0.547637	no
9130409I23Rik	chr1:182981367-182990798	GF_Ileum	CV_Ileum	0	0.00633818	1.79769e+308	1.79769e+308	0.267392	1	no
Cnih4	chr1:183076373-183142346	GF_Ileum	CV_Ileum	16.3634	18.1706	0.151131	-0.178852	0.858054	0.999999	no
Cnih4	chr1:183076373-183142346	GF_Ileum	CV_Ileum	1.80003	1.607	-0.16365	0.0911843	0.927346	0.999999	no
-	chr1:183215691-183230962	GF_Ileum	CV_Ileum	6.23004	8.04363	0.368607	-0.393825	0.69371	0.999999	no
Cnih3	chr1:183282758-183390772	GF_Ileum	CV_Ileum	2.25e-06	0.00798124	11.7928	-0.000673443	0.999463	1	no
Srp9	chr1:184054867-184062546	GF_Ileum	CV_Ileum	36.625	31.4703	-0.218839	0.504254	0.614083	0.999999	no
-	chr1:184185557-184193295	GF_Ileum	CV_Ileum	0.118765	0.242551	1.03018	-0.447257	0.65469	1	no
1700047M11Rik	chr1:184230964-184233420	GF_Ileum	CV_Ileum	0	0	0	0	1	1	no
Trp53bp2	chr1:184339274-184392567	GF_Ileum	CV_Ileum	10.4286	9.25451	-0.172319	0.389096	0.697205	0.999999	no
Capn8	chr1:184495118-184567719	GF_Ileum	CV_Ileum	7.45217	7.11483	-0.0668319	0.0956954	0.923763	0.999999	no
Susd4	chr1:184694396-184825871	GF_Ileum	CV_Ileum	0.00647731	0.00446692	-0.536116	0.0680456	0.945749	1	no
Tlr5	chr1:184884918-184906175	GF_Ileum	CV_Ileum	0.958318	0.594824	-0.68804	0.904976	0.365478	0.861872	no
Dusp10	chr1:185858339-185899515	GF_Ileum	CV_Ileum	1.2489	1.04946	-0.251009	0.353996	0.723342	0.999999	no
4930488B22Rik	chr1:186536375-186542868	GF_Ileum	CV_Ileum	0	0	0	0	1	1	no
Rab3gap2	chr1:187027994-187153280	GF_Ileum	CV_Ileum	9.05548	8.11137	-0.158846	0.22718	0.820284	0.999999	no
Mir664,Snora36b	chr1:187027994-187153280	GF_Ileum	CV_Ileum	0	0	0	0	1	1	no
Mir215	chr1:187027994-187153280	GF_Ileum	CV_Ileum	3.46259	3.81644	0.140376	-0.0115783	0.990762	0.999999	no
Mir194-1	chr1:187027994-187153280	GF_Ileum	CV_Ileum	0	0	0	0	1	1	no
Bpnt1	chr1:187156037-187181648	GF_Ileum	CV_Ileum	91.9663	75.3705	-0.287105	0.65008	0.51564	0.960219	no
Eprs	chr1:187186929-187252235	GF_Ileum	CV_Ileum	16.4737	12.7133	-0.373828	0.76834	0.442285	0.921185	no
Slc30a10	chr1:187253235-187292650	GF_Ileum	CV_Ileum	3.21244	5.03705	0.648908	-1.11842	0.263388	0.75019	no
5033404E19Rik	chr1:187308817-187326776	GF_Ileum	CV_Ileum	0	0	0	0	1	1	no
-	chr1:187308817-187326776	GF_Ileum	CV_Ileum	0	0	0	0	1	1	no
-	chr1:187435381-187468887	GF_Ileum	CV_Ileum	0.290035	0.323585	0.157919	-0.164424	0.869397	0.999999	no
D1Pas1	chr1:188791294-188794506	GF_Ileum	CV_Ileum	0.00395909	0	-1.79769e+308	-1.79769e+308	0.288813	1	no
1700007P06Rik	chr1:188868356-189175573	GF_Ileum	CV_Ileum	0.747934	0.376422	-0.990559	0.271289	0.786169	0.999999	no
Gpatch2	chr1:188868356-189175573	GF_Ileum	CV_Ileum	8.02184	7.98624	-0.00641652	0.00776829	0.993802	0.999999	no
Esrrg	chr1:189432934-190038763	GF_Ileum	CV_Ileum	0.627623	0.386071	-0.701032	1.04565	0.295724	0.789462	no
Ush2a	chr1:190086716-190788918	GF_Ileum	CV_Ileum	0.00189812	0.00222514	0.229325	-0.101514	0.919143	1	no
Ptpn14	chr1:191552146-191700572	GF_Ileum	CV_Ileum	0.0429534	0.074547	0.795377	-0.934304	0.350147	1	no
Angel2	chr1:192748986-192770897	GF_Ileum	CV_Ileum	23.0557	27.5348	0.256136	-0.476544	0.633687	0.999999	no
A230020J21Rik	chr1:192829710-192853660	GF_Ileum	CV_Ileum	0.0927021	4.96772	5.74384	-0.119955	0.904518	0.999999	no
1700022P22Rik	chr1:192860700-192866820	GF_Ileum	CV_Ileum	0.233689	0.155932	-0.583675	0.323031	0.746672	1	no
Tatdn3	chr1:192867435-192886811	GF_Ileum	CV_Ileum	1.25126	1.44362	0.206315	-0.293287	0.769303	0.999999	no
Nsl1	chr1:192886899-192908437	GF_Ileum	CV_Ileum	2.18661	1.54214	-0.503759	0.783519	0.433323	0.915047	no
Batf3	chr1:192922292-192932822	GF_Ileum	CV_Ileum	0.0784136	0.0169792	-2.20733	0.756426	0.449394	1	no
-	chr1:193048224-193049728	GF_Ileum	CV_Ileum	1.2618	1.28074	0.0214959	-0.0216521	0.982725	0.999999	no
Tmem206	chr1:193149843-193220920	GF_Ileum	CV_Ileum	1.2571	0.779706	-0.689096	0.300924	0.763472	0.999999	no
Ints7	chr1:193399491-193447568	GF_Ileum	CV_Ileum	5.61569	4.34873	0	0	1	1	no
Lpgat1	chr1:193541902-193608134	GF_Ileum	CV_Ileum	24.2147	27.5036	0.183737	-0.391898	0.695133	0.999999	no
Nek2	chr1:193645294-193656928	GF_Ileum	CV_Ileum	5.06585	4.54814	-0.15553	0.308234	0.757904	0.999999	no
Slc30a1	chr1:193717950-193737126	GF_Ileum	CV_Ileum	18.6347	16.3117	-0.192085	0.441015	0.659202	0.999999	no
Rd3	chr1:193801253-193812163	GF_Ileum	CV_Ileum	0.0034614	0.0109075	1.65589	-0.244849	0.806573	1	no
Gm10516	chr1:193922435-193975951	GF_Ileum	CV_Ileum	5.17197	5.17893	0.00193817	-0.00205037	0.998364	0.999999	no
Kcnh1	chr1:194014753-194334040	GF_Ileum	CV_Ileum	0.0121991	0.0207656	0.767427	-0.423976	0.671584	1	no
1700065J18Rik	chr1:194667898-194668933	GF_Ileum	CV_Ileum	0	0	0	0	1	1	no
Irf6	chr1:194979305-194998229	GF_Ileum	CV_Ileum	47.6126	47.2629	-0.0106344	0.0240538	0.98081	0.999999	no
A130010J15Rik	chr1:194999662-195027740	GF_Ileum	CV_Ileum	4.11542	3.10556	-0.406187	0.75319	0.451336	0.926774	no
Lamb3	chr1:195128187-195170075	GF_Ileum	CV_Ileum	80.9746	55.0873	-0.55575	1.14063	0.254023	0.736995	no
Plxna2	chr1:196446022-196643062	GF_Ileum	CV_Ileum	5.08338	5.57884	0.134177	-0.303091	0.76182	0.999999	no
Cd34	chr1:196765014-196803153	GF_Ileum	CV_Ileum	0.110416	0.0196571	-2.48983	0.969738	0.332177	1	no
A330023F24Rik,Mir29b-2,Mir29c	chr1:196843342-196918449	GF_Ileum	CV_Ileum	47.6613	0.499087	-6.57738	0.732844	0.463654	0.93472	no
Xkr4	chr1:3204562-3661615	GF_Ileum	CV_Ileum	0.0316333	0.0227867	-0.473248	0.148912	0.881623	1	no
Rp1	chr1:4280926-4399322	GF_Ileum	CV_Ileum	0	0	0	0	1	1	no
Sox17	chr1:4481008-4486494	GF_Ileum	CV_Ileum	0	0	0	0	1	1	no
Mrpl15	chr1:4754636-4775818	GF_Ileum	CV_Ileum	49.8985	47.0361	-0.0852259	0.1142	0.909079	0.999999	no
Rgs20	chr1:4899656-5060366	GF_Ileum	CV_Ileum	0.00809641	0.029428	1.86183	-0.310028	0.75654	1	no
Npbwr1	chr1:5903787-5907479	GF_Ileum	CV_Ileum	0	0	0	0	1	1	no
Sntg1	chr1:8352741-9289811	GF_Ileum	CV_Ileum	0	0	0	0	1	1	no
2610203C22Rik	chr1:9538126-9621173	GF_Ileum	CV_Ileum	0.0226068	0.0166725	-0.439291	0.0948223	0.924456	1	no
Mybl1	chr1:9657507-9690290	GF_Ileum	CV_Ileum	0.188481	0.368927	0.968919	-0.977709	0.328218	0.825784	no
Vcpip1	chr1:9708530-9761337	GF_Ileum	CV_Ileum	9.87447	10.2405	0.0525051	-0.104224	0.916992	0.999999	no
Snhg6	chr1:9932048-9934224	GF_Ileum	CV_Ileum	14.6861	18.9089	0.364616	-0.512298	0.608442	0.998488	no
Snord87	chr1:9932048-9934224	GF_Ileum	CV_Ileum	296.215	0	-1.79769e+308	-1.79769e+308	0.438393	0.918666	no
-	chr1:9950271-9957574	GF_Ileum	CV_Ileum	0.258332	0.229602	-0.170089	0.224189	0.82261	1	no
Lrrc67	chr1:9958706-9999211	GF_Ileum	CV_Ileum	0	0.0264792	1.79769e+308	1.79769e+308	0.191436	1	no
Cops5	chr1:10014911-10028233	GF_Ileum	CV_Ileum	43.6741	35.6882	-0.291329	0.626936	0.530701	0.96768	no
Arfgef1	chr1:10127387-10226162	GF_Ileum	CV_Ileum	29.6072	33.1549	0.16327	-0.318053	0.750445	0.999999	no
Cpa6	chr1:10314807-10710024	GF_Ileum	CV_Ileum	0	0	0	0	1	1	no
Slco5a1	chr1:12856630-12981216	GF_Ileum	CV_Ileum	0.00431841	0.0192505	2.15632	-1.14484	0.252275	1	no
Prdm14	chr1:13103508-13117244	GF_Ileum	CV_Ileum	0.0744796	0.0533777	-0.480607	0.408421	0.682964	1	no
Ncoa2	chr1:13129201-13364164	GF_Ileum	CV_Ileum	8.17878	8.68762	0.0870754	-0.18102	0.856352	0.999999	no
Tram1	chr1:13554782-13579985	GF_Ileum	CV_Ileum	44.5779	37.4733	-0.250466	0.540999	0.588508	0.992458	no
Lactb2	chr1:13614848-13650776	GF_Ileum	CV_Ileum	12.2606	12.8259	0.0650303	-0.119084	0.905209	0.999999	no
Gm5523	chr1:13775765-13777010	GF_Ileum	CV_Ileum	4.966	1.8268	-1.44277	2.47104	0.0134721	0.115241	no
Eya1	chr1:14159038-14300280	GF_Ileum	CV_Ileum	0	0.00201855	1.79769e+308	1.79769e+308	0.293259	1	no
Msc	chr1:14743428-14746047	GF_Ileum	CV_Ileum	0.00783191	0	-1.79769e+308	-1.79769e+308	0.288813	1	no
Trpa1	chr1:14862728-14908943	GF_Ileum	CV_Ileum	0.00881647	0.0138841	0.655161	-0.321494	0.747836	1	no
Gm106	chr1:15843942-15882803	GF_Ileum	CV_Ileum	0.00467574	0.0135301	1.53291	-0.528942	0.596846	1	no
4930444P10Rik	chr1:16056059-16083122	GF_Ileum	CV_Ileum	0	0	0	0	1	1	no
Rpl7	chr1:16091375-16094514	GF_Ileum	CV_Ileum	563.785	461.734	-0.288084	0.610609	0.541459	0.972207	no
Stau2	chr1:16218890-16509383	GF_Ileum	CV_Ileum	2.86825	2.46968	-0.215847	0.34805	0.727803	0.999999	no
Ube2w	chr1:16558079-16609367	GF_Ileum	CV_Ileum	7.35058	6.61139	-0.152904	0.300847	0.763531	0.999999	no
Tceb1	chr1:16631671-16647190	GF_Ileum	CV_Ileum	24.7305	28.629	0.211184	-0.380457	0.703606	0.999999	no
Jph1	chr1:16985020-17087970	GF_Ileum	CV_Ileum	0.0254659	0.037609	0.562513	-0.428168	0.668529	1	no
Crisp4	chr1:18105271-18127132	GF_Ileum	CV_Ileum	0	0	0	0	1	1	no
Defb44-ps	chr1:18200133-18213645	GF_Ileum	CV_Ileum	0	0	0	0	1	1	no
Defb18	chr1:18226553-18227524	GF_Ileum	CV_Ileum	0	0	0	0	1	1	no
Defb41,Gm15386	chr1:18241058-18255219	GF_Ileum	CV_Ileum	0	0	0	0	1	1	no
Pkhd1	chr1:20047859-20608138	GF_Ileum	CV_Ileum	0.250188	0.311824	0.317719	-0.413798	0.679022	0.999999	no
Il17f	chr1:20767229-20774351	GF_Ileum	CV_Ileum	0	0.00782795	1.79769e+308	1.79769e+308	0.293259	1	no
Mcm3	chr1:20793072-20810349	GF_Ileum	CV_Ileum	6.80673	4.35076	-0.645696	1.21594	0.224008	0.695047	no
6720483E21Rik	chr1:20878730-20880554	GF_Ileum	CV_Ileum	0	0	0	0	1	1	no
Tram2	chr1:20986383-21069306	GF_Ileum	CV_Ileum	4.9911	5.02217	0.00895396	-0.0203994	0.983725	0.999999	no
Gm4956	chr1:21275326-21288393	GF_Ileum	CV_Ileum	0.0611359	0.10061	0.718685	-0.451724	0.651468	1	no
Kcnq5	chr1:21388483-21952023	GF_Ileum	CV_Ileum	0.00501513	0.00129777	-1.95025	0.270516	0.786763	1	no
Rims1	chr1:22278502-22812563	GF_Ileum	CV_Ileum	0	0	0	0	1	1	no
4933415F23Rik	chr1:23107312-23109092	GF_Ileum	CV_Ileum	0	0	0	0	1	1	no
Ogfrl1	chr1:23373262-23390014	GF_Ileum	CV_Ileum	0.147291	0.111533	-0.401197	0.456292	0.64818	1	no
Smap1	chr1:23768764-23929128	GF_Ileum	CV_Ileum	37.3208	37.4762	0.00599144	-0.0132586	0.989422	0.999999	no
1110058L19Rik	chr1:24002777-24012479	GF_Ileum	CV_Ileum	10.9479	11.6711	0.0922852	-0.169849	0.865129	0.999999	no
Fam135a	chr1:24017596-24107180	GF_Ileum	CV_Ileum	12.0694	15.7069	0.380045	-0.728092	0.466557	0.936694	no
Col19a1	chr1:24264521-24594276	GF_Ileum	CV_Ileum	0	0	0	0	1	1	no
Bai3	chr1:25124320-25886552	GF_Ileum	CV_Ileum	0.0226106	0.0118536	-0.931673	0.516764	0.605321	1	no
Gm20172	chr1:25124320-25886552	GF_Ileum	CV_Ileum	0.21607	0.0837757	-1.36689	1.09085	0.275341	1	no
4931408C20Rik	chr1:26738645-26744305	GF_Ileum	CV_Ileum	0	0	0	0	1	1	no
Gm597	chr1:28832966-28837097	GF_Ileum	CV_Ileum	0	0	0	0	1	1	no
Phf3	chr1:30859186-30930751	GF_Ileum	CV_Ileum	8.35687	8.47572	0.0203728	-0.0405687	0.96764	0.999999	no
Ptp4a1	chr1:30997147-31006928	GF_Ileum	CV_Ileum	60.6045	55.2196	-0.134244	0.246437	0.805344	0.999999	no
4931428L18Rik	chr1:31197922-31279501	GF_Ileum	CV_Ileum	0.072489	0.0212491	-1.77036	0.672037	0.50156	1	no
Gm9839	chr1:32229650-32714583	GF_Ileum	CV_Ileum	0.000743716	0.000674242	-0.141485	0.00196327	0.998434	1	no
Gm5415	chr1:32229650-32714583	GF_Ileum	CV_Ileum	0.0180695	0	-1.79769e+308	-1.79769e+308	0.158989	1	no
Prim2	chr1:33510655-33726605	GF_Ileum	CV_Ileum	2.9991	2.21286	-0.438614	0.771322	0.440516	0.920172	no
Bag2	chr1:33802328-33814595	GF_Ileum	CV_Ileum	0.772285	0.597193	-0.370937	0.52157	0.60197	0.996558	no
Zfp451	chr1:33818366-33871398	GF_Ileum	CV_Ileum	2.77225	2.57443	-0.106804	0.132333	0.894721	0.999999	no
Bend6	chr1:33908896-33964466	GF_Ileum	CV_Ileum	0	0.00416828	1.79769e+308	1.79769e+308	0.287998	1	no
Mir5103	chr1:34485919-34490292	GF_Ileum	CV_Ileum	0.127884	0.273583	1.09714	-1.372	0.170064	1	no
Ccdc115	chr1:34493514-34506196	GF_Ileum	CV_Ileum	4.83964	4.79609	-0.0130424	0.0130036	0.989625	0.999999	no
Prss40	chr1:34609176-34617788	GF_Ileum	CV_Ileum	0	0	0	0	1	1	no
AA619741	chr1:34690379-34693055	GF_Ileum	CV_Ileum	0	0	0	0	1	1	no
Fam168b	chr1:34870062-34899895	GF_Ileum	CV_Ileum	31.1858	25.269	-0.303524	0.677495	0.498092	0.951641	no
Uggt1	chr1:36196822-36301147	GF_Ileum	CV_Ileum	12.4112	10.511	-0.239744	0.543107	0.587056	0.991912	no
Neurl3	chr1:36320748-36338794	GF_Ileum	CV_Ileum	101.281	101.983	0.00996551	-0.0164494	0.986876	0.999999	no
4632411B12Rik	chr1:36392569-36426026	GF_Ileum	CV_Ileum	24.0328	23.4794	-0.0336119	0.0653604	0.947887	0.999999	no
Lman2l	chr1:36475658-36502086	GF_Ileum	CV_Ileum	6.42504	5.30996	-0.275005	0.472328	0.636693	0.999999	no
Ankrd23,Ankrd39	chr1:36587033-36604101	GF_Ileum	CV_Ileum	1.57515	1.56369	-0.0105373	0.0119136	0.990495	0.999999	no
Sema4c	chr1:36605486-36615256	GF_Ileum	CV_Ileum	0.390946	0.225783	-0.792033	0.828596	0.407333	0.896068	no
Fam178b	chr1:36619540-36740028	GF_Ileum	CV_Ileum	0.0661196	0.0657959	-0.00708054	0.00341228	0.997277	1	no
Actr1b	chr1:36754956-36766854	GF_Ileum	CV_Ileum	40.408	35.4827	-0.187525	0.400545	0.688755	0.999999	no
Tmem131	chr1:36849033-36996476	GF_Ileum	CV_Ileum	49.8707	50.3965	0.0151311	-0.014642	0.988318	0.999999	no
6330578E17Rik	chr1:37473929-37486948	GF_Ileum	CV_Ileum	31.9044	26.9883	-0.241419	0.55786	0.57694	0.987844	no
Mgat4a	chr1:37496110-37597884	GF_Ileum	CV_Ileum	74.8501	79.2627	0.0826367	-0.141529	0.887452	0.999999	no
4930594C11Rik	chr1:37496110-37597884	GF_Ileum	CV_Ileum	0.21604	0.126371	-0.773633	0.044509	0.964499	1	no
2010300C02Rik	chr1:37668520-37776656	GF_Ileum	CV_Ileum	27.1785	22.5018	-0.272423	0.4129	0.67968	0.999999	no
Tsga10	chr1:37811620-37921924	GF_Ileum	CV_Ileum	0.772494	0.750679	-0.0413272	0.0494319	0.960575	0.999999	no
Mitd1	chr1:37929050-37947256	GF_Ileum	CV_Ileum	9.89602	9.52749	-0.0547518	0.0823974	0.934331	0.999999	no
Lyg2	chr1:37962767-37973338	GF_Ileum	CV_Ileum	0	0	0	0	1	1	no
Lyg1	chr1:38003582-38014604	GF_Ileum	CV_Ileum	0	0	0	0	1	1	no
Txndc9	chr1:38040483-38054395	GF_Ileum	CV_Ileum	10.6929	10.5752	-0.0159641	0.0331393	0.973564	0.999999	no
Rev1	chr1:38054854-38186511	GF_Ileum	CV_Ileum	3.81888	3.5283	-0.114175	0.104862	0.916485	0.999999	no
Aff3	chr1:38234171-38721800	GF_Ileum	CV_Ileum	0.018903	0.0170653	-0.147545	0.101889	0.918845	1	no
Lonrf2	chr1:38851353-38878060	GF_Ileum	CV_Ileum	0	0	0	0	1	1	no
Chst10	chr1:38920717-38955005	GF_Ileum	CV_Ileum	0.013916	0.0124587	-0.159594	0.0807892	0.93561	1	no
Tbc1d8	chr1:39424695-39535592	GF_Ileum	CV_Ileum	6.95375	6.20541	-0.164264	0.135961	0.891852	0.999999	no
Snord89	chr1:39604445-39606239	GF_Ileum	CV_Ileum	2.36506	2.17977	-0.117702	0.0787736	0.937213	0.999999	no
Rnf149	chr1:39608143-39652627	GF_Ileum	CV_Ileum	26.7774	25.4673	-0.0723675	0.155735	0.876242	0.999999	no
Creg2	chr1:39675250-39708027	GF_Ileum	CV_Ileum	0.0183707	0.00192166	-3.25698	1.25345	0.210041	1	no
Rfx8	chr1:39722145-39777834	GF_Ileum	CV_Ileum	0	0	0	0	1	1	no
Gm3646	chr1:39860985-39862177	GF_Ileum	CV_Ileum	0	0	0	0	1	1	no
1700066B17Rik	chr1:39899272-39904175	GF_Ileum	CV_Ileum	0	0	0	0	1	1	no
LOC100047133	chr1:40133056-40182070	GF_Ileum	CV_Ileum	0	0	0	0	1	1	no
Mfsd9	chr1:40828884-40847527	GF_Ileum	CV_Ileum	16.0804	17.0998	0.0886796	-0.189325	0.849838	0.999999	no
4930448I06Rik	chr1:41224404-41238097	GF_Ileum	CV_Ileum	0	0	0	0	1	1	no
2610017I09Rik	chr1:42705044-42751670	GF_Ileum	CV_Ileum	0	0	0	0	1	1	no
Tgfbrap1	chr1:43104007-43155467	GF_Ileum	CV_Ileum	8.20063	7.7261	-0.0859936	0.160195	0.872727	0.999999	no
Fhl2	chr1:43179914-43220806	GF_Ileum	CV_Ileum	19.2256	18.4317	-0.0608462	0.110401	0.912091	0.999999	no
Nck2	chr1:43502595-43643381	GF_Ileum	CV_Ileum	1.4747	1.34974	-0.127743	0.107598	0.914314	0.999999	no
Uxs1	chr1:43802093-43884700	GF_Ileum	CV_Ileum	7.3946	6.90308	-0.0992311	0.153904	0.877685	0.999999	no
A530098C11Rik	chr1:44066252-44076851	GF_Ileum	CV_Ileum	0	0.0265857	1.79769e+308	1.79769e+308	0.170805	1	no
1700029F09Rik	chr1:44143461-44159311	GF_Ileum	CV_Ileum	6.48312	4.56768	-0.505228	0.72795	0.466644	0.936772	no
Kdelc1	chr1:44163390-44175618	GF_Ileum	CV_Ileum	2.86636	2.41098	-0.2496	0.458144	0.646849	0.999999	no
4832428D23Rik	chr1:44260914-44275776	GF_Ileum	CV_Ileum	0.0200002	1.74e-06	-13.4882	0.0368458	0.970608	1	no
4930521E06Rik	chr1:44608515-44853681	GF_Ileum	CV_Ileum	0	0	0	0	1	1	no
Col5a2	chr1:45431175-45560127	GF_Ileum	CV_Ileum	0.00559171	0.00136023	-2.03943	0.652195	0.514276	1	no
Slc40a1	chr1:45964914-45985131	GF_Ileum	CV_Ileum	8.85058	10.5903	0.258899	-0.542567	0.587428	0.991978	no
Gm3852	chr1:46068391-46069108	GF_Ileum	CV_Ileum	0.031035	0.00419295	-2.88786	0.496955	0.619221	1	no
Gm4776	chr1:46077259-46087282	GF_Ileum	CV_Ileum	0.0188565	0.010801	-0.803889	0.343135	0.731497	1	no
Dnahc7b	chr1:46123582-46430395	GF_Ileum	CV_Ileum	0.31428	0.164944	-0.930071	0.675536	0.499335	1	no
Slc39a10	chr1:46864388-46910435	GF_Ileum	CV_Ileum	1.03689	0.923418	-0.167211	0.267721	0.788914	0.999999	no
Obfc2a	chr1:51521661-51535243	GF_Ileum	CV_Ileum	3.62296	3.53125	-0.036987	0.0612732	0.951142	0.999999	no
Myo1b	chr1:51806609-51972818	GF_Ileum	CV_Ileum	3.75297	3.29668	-0.187022	0.364516	0.715473	0.999999	no
Gls	chr1:52220289-52290076	GF_Ileum	CV_Ileum	152.49	183.193	0	0	1	1	no
-	chr1:52305802-52315060	GF_Ileum	CV_Ileum	0.197741	0.323	0.707922	-0.547538	0.584009	0.990581	no
Nab1	chr1:52512692-52557349	GF_Ileum	CV_Ileum	8.88219	8.98554	0.0166894	-0.0345759	0.972418	0.999999	no
Mfsd6	chr1:52713006-52809005	GF_Ileum	CV_Ileum	26.7048	24.9993	-0.0952094	0.186124	0.852348	0.999999	no
Inpp1	chr1:52842282-52874600	GF_Ileum	CV_Ileum	5.30415	5.43735	0.0357806	-0.0559437	0.955387	0.999999	no
1700019D03Rik	chr1:52901889-53010169	GF_Ileum	CV_Ileum	6.51671	7.52914	0.208342	-0.170326	0.864754	0.999999	no
1700019A02Rik	chr1:53215420-53244461	GF_Ileum	CV_Ileum	0	0.0203425	1.79769e+308	1.79769e+308	0.287998	1	no
Pms1	chr1:53245985-53353840	GF_Ileum	CV_Ileum	1.04183	0.89283	-0.222669	0.347258	0.728398	0.999999	no
Asnsd1	chr1:53401482-53409543	GF_Ileum	CV_Ileum	20.6107	20.0931	-0.0366906	0.0506602	0.959596	0.999999	no
Stk17b	chr1:53812355-53842059	GF_Ileum	CV_Ileum	56.0166	58.6995	0.0674925	-0.138862	0.889559	0.999999	no
Hecw2	chr1:53863717-54251878	GF_Ileum	CV_Ileum	0.00895072	0.0454327	2.34365	-1.68306	0.0923639	1	no
Gtf3c3	chr1:54452781-54495856	GF_Ileum	CV_Ileum	3.71692	4.24934	0.193131	-0.357025	0.721073	0.999999	no
Pgap1	chr1:54520079-54614526	GF_Ileum	CV_Ileum	3.14065	3.95479	0.332536	-0.697093	0.485745	0.945927	no
Ankrd44	chr1:54702183-54983231	GF_Ileum	CV_Ileum	0.870078	0.967758	0.153502	-0.217181	0.828068	0.999999	no
Sf3b1	chr1:55042012-55084337	GF_Ileum	CV_Ileum	43.1985	46.8222	0.116211	-0.220731	0.825302	0.999999	no
Hspd1	chr1:55134635-55148161	GF_Ileum	CV_Ileum	86.0082	68.1006	-0.336808	0.673942	0.500348	0.952719	no
Rftn2	chr1:55188088-55292388	GF_Ileum	CV_Ileum	0.700656	0.852553	0.283082	-0.0348278	0.972217	0.999999	no
Boll	chr1:55356912-55420313	GF_Ileum	CV_Ileum	0.0688017	0.0431	-0.674757	0.282682	0.777421	1	no
-	chr1:55943947-55979550	GF_Ileum	CV_Ileum	0	0	0	0	1	1	no
-	chr1:56068948-56077043	GF_Ileum	CV_Ileum	0	0.0273893	1.79769e+308	1.79769e+308	0.350011	1	no
Hsfy2	chr1:56692892-56694295	GF_Ileum	CV_Ileum	0	0	0	0	1	1	no
Satb2	chr1:56850824-57038477	GF_Ileum	CV_Ileum	12.109	8.36873	-0.533002	0.931771	0.351455	0.849343	no
BC055402	chr1:57257488-57271840	GF_Ileum	CV_Ileum	0	0	0	0	1	1	no
4930558J18Rik	chr1:57416065-57434388	GF_Ileum	CV_Ileum	0.0834221	0.0744568	-0.164027	0.113173	0.909893	1	no
1110034B05Rik	chr1:57445087-57472802	GF_Ileum	CV_Ileum	1.8903	3.14185	0.733001	-0.504102	0.614189	0.999999	no
Kctd18	chr1:58011834-58026985	GF_Ileum	CV_Ileum	1.64849	2.00376	0.281569	-0.400828	0.688547	0.999999	no
Clk1	chr1:58468831-58480932	GF_Ileum	CV_Ileum	81.0206	71.8206	-0.173891	0.305953	0.75964	0.999999	no
Ppil3	chr1:58487836-58561790	GF_Ileum	CV_Ileum	6.87497	6.29662	-0.126775	0.102829	0.918099	0.999999	no
Orc2	chr1:58487836-58561790	GF_Ileum	CV_Ileum	2.82539	2.44858	-0.206508	0.167827	0.866719	0.999999	no
Fam126b	chr1:58579570-58643177	GF_Ileum	CV_Ileum	4.32718	6.45946	0.577986	-1.20309	0.228943	0.702666	no
Als2cr12	chr1:58709373-58752833	GF_Ileum	CV_Ileum	4.10062	4.37561	0.0936409	-0.1237	0.901553	0.999999	no
Cflar	chr1:58769030-58815844	GF_Ileum	CV_Ileum	4.69608	0	-1.79769e+308	-1.79769e+308	0.191411	0.642238	no
-	chr1:58942544-58947837	GF_Ileum	CV_Ileum	18.2841	13.1346	-0.477217	0.875639	0.381227	0.875479	no
Trak2	chr1:58957293-59030326	GF_Ileum	CV_Ileum	12.2761	11.115	-0.143344	0.289935	0.771866	0.999999	no
Als2cr11	chr1:59107349-59151744	GF_Ileum	CV_Ileum	0	0	0	0	1	1	no
Als2,Als2cr4,Mpp4	chr1:59157436-59296193	GF_Ileum	CV_Ileum	13.1139	14.1037	0.104978	-0.135272	0.892397	0.999999	no
Sumo1	chr1:59696277-59727678	GF_Ileum	CV_Ileum	74.28	82.2238	0.146581	-0.306184	0.759464	0.999999	no
Ica1l	chr1:60045911-60099931	GF_Ileum	CV_Ileum	0.0863892	0.117751	0.446812	-0.473242	0.63604	1	no
Wdr12	chr1:60132905-60210878	GF_Ileum	CV_Ileum	2.18037	1.5608	-0.482284	0.659923	0.509304	0.957068	no
Raph1	chr1:60540017-60623609	GF_Ileum	CV_Ileum	12.024	14.0164	0.221197	-0.467634	0.640046	0.999999	no
-	chr1:60628336-60636971	GF_Ileum	CV_Ileum	0.999905	2.00545	1.00406	-1.10425	0.269483	0.757796	no
-	chr1:60882247-60885173	GF_Ileum	CV_Ileum	0.119747	0.144355	0.26963	-0.193133	0.846855	1	no
4930487H11Rik	chr1:62749325-62865266	GF_Ileum	CV_Ileum	0	0	0	0	1	1	no
Ino80d	chr1:63094374-63171517	GF_Ileum	CV_Ileum	4.69955	4.49547	0	0	1	1	no
Ndufs1	chr1:63190165-63223396	GF_Ileum	CV_Ileum	46.8956	45.6764	-0.038005	0.0826805	0.934106	0.999999	no
Gpr1	chr1:63229267-63260783	GF_Ileum	CV_Ileum	0	0	0	0	1	1	no
Dytn	chr1:63669424-63733501	GF_Ileum	CV_Ileum	0	0	0	0	1	1	no
Mdh1b	chr1:63745400-63776892	GF_Ileum	CV_Ileum	0.00785243	0.0115377	0.555141	-0.175203	0.86092	1	no
Klf7	chr1:64076029-64168858	GF_Ileum	CV_Ileum	2.25894	2.60732	0.206921	-0.399578	0.689467	0.999999	no
Mettl21a	chr1:64652930-64663778	GF_Ileum	CV_Ileum	2.10211	2.05108	-0.0354536	0.0519148	0.958597	0.999999	no
2810408I11Rik	chr1:64726442-64737233	GF_Ileum	CV_Ileum	2.51332	2.57963	0.0375703	-0.0551283	0.956036	0.999999	no
Fzd5	chr1:64777131-64784324	GF_Ileum	CV_Ileum	23.5777	28.402	0.268572	-0.556447	0.577905	0.988174	no
Plekhm3	chr1:64835694-65003398	GF_Ileum	CV_Ileum	1.55507	1.45456	-0.0963999	0.192335	0.84748	0.999999	no
Akr1cl	chr1:65059659-65079322	GF_Ileum	CV_Ileum	0	0	0	0	1	1	no
Cryge	chr1:65095130-65097737	GF_Ileum	CV_Ileum	0	0	0	0	1	1	no
Crygd	chr1:65108411-65110014	GF_Ileum	CV_Ileum	0	0	0	0	1	1	no
Crygc	chr1:65118105-65120095	GF_Ileum	CV_Ileum	0	0	0	0	1	1	no
Crygb	chr1:65126800-65128841	GF_Ileum	CV_Ileum	0	0	0	0	1	1	no
Cryga	chr1:65146962-65149937	GF_Ileum	CV_Ileum	0.0278509	0	-1.79769e+308	-1.79769e+308	0.288813	1	no
D630023F18Rik	chr1:65153886-65169767	GF_Ileum	CV_Ileum	0.265351	0.157761	-0.75016	0.849894	0.395384	1	no
Idh1	chr1:65205189-65233053	GF_Ileum	CV_Ileum	163.339	136.154	-0.262627	0.53789	0.590653	0.99312	no
1110028C15Rik	chr1:66747420-66864169	GF_Ileum	CV_Ileum	0.690751	1.20579	0.803741	-0.458386	0.646675	0.999999	no
Acadl	chr1:66877426-66909962	GF_Ileum	CV_Ileum	69.427	63.2379	-0.134705	0.292127	0.770189	0.999999	no
Myl1	chr1:66970869-66991630	GF_Ileum	CV_Ileum	0	0	0	0	1	1	no
Lancl1	chr1:67047090-67085454	GF_Ileum	CV_Ileum	4.61512	3.64287	-0.341293	0.462295	0.643869	0.999999	no
Erbb4	chr1:68086539-69154633	GF_Ileum	CV_Ileum	0	0	0	0	1	1	no
Ikzf2	chr1:69577783-69733810	GF_Ileum	CV_Ileum	0.139811	0.264184	0.918061	-1.17544	0.239818	1	no
Bard1	chr1:71074108-71149546	GF_Ileum	CV_Ileum	1.03049	1.08695	0.0769564	-0.119935	0.904535	0.999999	no
Abca12	chr1:71288713-71461484	GF_Ileum	CV_Ileum	0.0890936	0.147944	0.731657	-0.784672	0.432646	1	no
Fn1	chr1:71632096-71699779	GF_Ileum	CV_Ileum	0.0102563	0.00673752	-0.606215	0.307244	0.758658	1	no
4933417E11Rik	chr1:72005571-72051769	GF_Ileum	CV_Ileum	0.0131949	0	-1.79769e+308	-1.79769e+308	0.288813	1	no
Mreg	chr1:72205806-72258881	GF_Ileum	CV_Ileum	3.94602	4.59015	0.218142	-0.435215	0.663406	0.999999	no
Pecr	chr1:72305746-72330888	GF_Ileum	CV_Ileum	16.1579	10.1412	-0.672017	1.24542	0.212977	0.677804	no
2014-03-04	chr1:72473685-72583138	GF_Ileum	CV_Ileum	0.101164	0.0578236	-0.806966	0.873985	0.382127	1	no
Ankar	chr1:72689553-72747138	GF_Ileum	CV_Ileum	0.00546244	0.00852095	0.64147	-0.272472	0.785259	1	no
Igfbp5	chr1:72904638-72921439	GF_Ileum	CV_Ileum	0.0721016	0.0363131	-0.989541	1.06193	0.288269	1	no
Tnp1	chr1:73061648-73062473	GF_Ileum	CV_Ileum	0	0	0	0	1	1	no
Pinc	chr1:73437958-73477353	GF_Ileum	CV_Ileum	0	0	0	0	1	1	no
Tns1	chr1:73956804-74171021	GF_Ileum	CV_Ileum	0.00612673	0.00598067	-0.0348098	0.019234	0.984654	1	no
Cxcr1	chr1:74238359-74241205	GF_Ileum	CV_Ileum	0	0	0	0	1	1	no
Aamp	chr1:74326413-74331312	GF_Ileum	CV_Ileum	68.2168	52.2727	-0.384069	0.8555	0.392274	0.885105	no
Tmbim1	chr1:74331607-74400266	GF_Ileum	CV_Ileum	78.9528	69.6629	-0.180599	0.388573	0.697592	0.999999	no
Usp37	chr1:74449292-74634802	GF_Ileum	CV_Ileum	15.3929	14.6825	-0.0681709	0.0149633	0.988061	0.999999	no
Zfp142	chr1:74449292-74634802	GF_Ileum	CV_Ileum	2.03657	1.32513	-0.620014	0.0028106	0.997757	0.999999	no
Rnf25	chr1:74640325-74683467	GF_Ileum	CV_Ileum	12.6677	10.7362	-0.23867	0.444845	0.656431	0.999999	no
Prkag3	chr1:74785242-74796026	GF_Ileum	CV_Ileum	1.83473	1.58653	-0.209689	0.309318	0.75708	0.999999	no
Fev	chr1:74927954-74932002	GF_Ileum	CV_Ileum	0.466015	0.127233	-1.8729	1.71717	0.0859488	0.408105	no
Cryba2	chr1:74936517-74939709	GF_Ileum	CV_Ileum	0.699013	0.480094	-0.542002	0.565294	0.571874	0.986201	no
Mir375	chr1:74946132-74947295	GF_Ileum	CV_Ileum	0.15746	0.139013	-0.179767	0.145983	0.883935	1	no
Ccdc108	chr1:74948653-74982173	GF_Ileum	CV_Ileum	0.0964191	0.0815264	-0.242051	0.29507	0.76794	1	no
Ihh	chr1:74991891-74999270	GF_Ileum	CV_Ileum	45.9388	38.4167	-0.257981	0.491549	0.623038	0.999999	no
Nhej1	chr1:75013749-75121815	GF_Ileum	CV_Ileum	6.73736	5.60324	-0.265921	0.415006	0.678137	0.999999	no
Slc23a3	chr1:75122115-75131011	GF_Ileum	CV_Ileum	0.924445	1.04588	0.178061	-0.179861	0.857262	0.999999	no
1810031K17Rik	chr1:75131788-75144483	GF_Ileum	CV_Ileum	44.5046	36.4039	-0.289862	0.400066	0.689108	0.999999	no
Abcb6	chr1:75168204-75176965	GF_Ileum	CV_Ileum	39.3602	25.4606	-0.628469	1.26161	0.207089	0.668646	no
Atg9a	chr1:75177432-75207353	GF_Ileum	CV_Ileum	68.4829	49.5563	-0.466675	0.867437	0.385702	0.879455	no
Glb1l	chr1:75177432-75207353	GF_Ileum	CV_Ileum	1.56907	3.75954	1.26064	-0.176433	0.859954	0.999999	no
Tuba4a	chr1:75207403-75215828	GF_Ileum	CV_Ileum	86.8668	60.1167	-0.531038	0.846606	0.397215	0.888682	no
A630095N17Rik	chr1:75216009-75228668	GF_Ileum	CV_Ileum	0.0908795	0.251688	1.46961	-0.976534	0.3288	1	no
Ptprn	chr1:75243339-75260783	GF_Ileum	CV_Ileum	0.565191	0.368475	-0.617171	0.712072	0.47642	0.941704	no
Resp18	chr1:75268776-75274973	GF_Ileum	CV_Ileum	1.99932	1.2663	-0.658894	0.75219	0.451937	0.927091	no
Dnpep	chr1:75305137-75314212	GF_Ileum	CV_Ileum	86.3732	65.5982	-0.396927	0.836953	0.402619	0.892698	no
Gm15179	chr1:75364784-75371590	GF_Ileum	CV_Ileum	0	0	0	0	1	1	no
Speg	chr1:75371871-75439751	GF_Ileum	CV_Ileum	2.31917	1.31101	-0.822933	0.478811	0.632073	0.999999	no
Chpf	chr1:75471143-75476046	GF_Ileum	CV_Ileum	1.96711	1.11669	-0.816846	1.34687	0.178022	0.61848	no
Obsl1	chr1:75482399-75503027	GF_Ileum	CV_Ileum	0.0352506	0.0163209	-1.11093	0.917978	0.358631	1	no
Epha4	chr1:77363759-77511663	GF_Ileum	CV_Ileum	0.749	0.78396	0.0658151	-0.117131	0.906756	0.999999	no
Pax3	chr1:78097841-78193711	GF_Ileum	CV_Ileum	0.0037556	0	-1.79769e+308	-1.79769e+308	0.407355	1	no
Sgpp2	chr1:78306075-78416922	GF_Ileum	CV_Ileum	1.07833	0	-1.79769e+308	-1.79769e+308	0.401379	0.891757	no
Farsb	chr1:78421410-78485428	GF_Ileum	CV_Ileum	19.4512	14.0521	-0.469078	0.988044	0.323131	0.820341	no
Scg2	chr1:79431243-79436724	GF_Ileum	CV_Ileum	2.23577	1.77021	-0.336849	0.500346	0.616832	0.999999	no
Ap1s3	chr1:79603011-79668643	GF_Ileum	CV_Ileum	3.47049	4.0264	0.214351	-0.381601	0.702758	0.999999	no
Wdfy1	chr1:79698836-79758344	GF_Ileum	CV_Ileum	10.307	11.9179	0.209503	-0.27912	0.780153	0.999999	no
Serpine2	chr1:79790895-79855240	GF_Ileum	CV_Ileum	0.0599476	0.0380801	-0.654664	0.453479	0.650204	1	no
Fam124b	chr1:80195273-80210519	GF_Ileum	CV_Ileum	0	0.00303735	1.79769e+308	1.79769e+308	0.293259	1	no
Cul3	chr1:80261429-80337481	GF_Ileum	CV_Ileum	31.6132	32.6969	0.0486268	-0.101823	0.918897	0.999999	no
Dock10	chr1:80497647-80755128	GF_Ileum	CV_Ileum	0.0454617	0.280587	2.62573	-2.48117	0.0130953	0.112773	no
Irs1	chr1:82229679-82288014	GF_Ileum	CV_Ileum	0.0968086	0.0748202	-0.371708	0.226371	0.820913	1	no
Col4a4	chr1:82447297-82583424	GF_Ileum	CV_Ileum	0.00314443	0.00904345	1.52408	-0.691076	0.489518	1	no
Tm4sf20	chr1:82721328-82765031	GF_Ileum	CV_Ileum	96.3411	97.4157	0.0160024	-0.0299203	0.976131	0.999999	no
Slc19a3	chr1:83009097-83035023	GF_Ileum	CV_Ileum	0.0042969	0.115854	4.75287	-1.79095	0.0733006	1	no
Sphkap	chr1:83252355-83404775	GF_Ileum	CV_Ileum	0.0529493	0.0191639	-1.46622	1.30531	0.191787	1	no
Pid1	chr1:84032867-84281220	GF_Ileum	CV_Ileum	0.0887255	0.0293977	-1.59365	1.2039	0.228627	1	no
Dner	chr1:84366413-84692796	GF_Ileum	CV_Ileum	0.154336	0.0514616	-1.58451	1.629	0.103312	1	no
Trip12	chr1:84717763-84836284	GF_Ileum	CV_Ileum	18.944	19.9662	0.0758221	-0.146454	0.883563	0.999999	no
Slc16a14	chr1:84903279-84931658	GF_Ileum	CV_Ileum	0	0	0	0	1	1	no
A530032D15Rik	chr1:85084713-85106428	GF_Ileum	CV_Ileum	0.0153519	0.00928663	-0.725189	0.257381	0.796885	1	no
C130026I21Rik	chr1:85242918-85267141	GF_Ileum	CV_Ileum	0.030908	0.0542447	0.811499	-0.414884	0.678227	1	no
Sp110	chr1:87344098-87541670	GF_Ileum	CV_Ileum	0	0.208766	1.79769e+308	1.79769e+308	0.329127	1	no
Sp110	chr1:87344098-87541670	GF_Ileum	CV_Ileum	0.428326	0.635228	0.568564	-0.609358	0.542287	0.972505	no
A630001G21Rik	chr1:87613657-87633197	GF_Ileum	CV_Ileum	0.132754	0.173751	0.388261	-0.272453	0.785274	1	no
Cab39	chr1:87690008-87761187	GF_Ileum	CV_Ileum	280.886	7.92406	-5.1476	0.984655	0.324793	0.821941	no
Gpr55	chr1:87834825-87857660	GF_Ileum	CV_Ileum	0.797361	0.879533	0.141504	-0.22509	0.821909	0.999999	no
Htr2b	chr1:87961193-88035870	GF_Ileum	CV_Ileum	0	0.0238211	1.79769e+308	1.79769e+308	0.437565	1	no
B3gnt7	chr1:88177465-88203880	GF_Ileum	CV_Ileum	0	0.0093794	1.79769e+308	1.79769e+308	0.404504	1	no
Ncl	chr1:88238548-88264539	GF_Ileum	CV_Ileum	50.1154	45.3076	0	0	1	1	no
Snora75	chr1:88238548-88264539	GF_Ileum	CV_Ileum	0	12.537	0	0	1	1	no
Snord82	chr1:88238548-88264539	GF_Ileum	CV_Ileum	0	0	0	0	1	1	no
Nmur1	chr1:88282899-88284716	GF_Ileum	CV_Ileum	0	0	0	0	1	1	no
Pde6d	chr1:88439589-88479341	GF_Ileum	CV_Ileum	13.7496	12.5648	-0.13	0.246769	0.805087	0.999999	no
Nppc	chr1:88562867-88567148	GF_Ileum	CV_Ileum	0.0952343	0.0246112	-1.95217	0.87415	0.382036	1	no
Alppl2	chr1:88983265-88986503	GF_Ileum	CV_Ileum	1.6538	1.17167	-0.497213	0.813057	0.416185	0.902898	no
Alpi	chr1:88994573-88998214	GF_Ileum	CV_Ileum	278.889	263.939	-0.0794887	0.147063	0.883082	0.999999	no
Ecel1	chr1:89044229-89051602	GF_Ileum	CV_Ileum	0.0194806	0.00779857	-1.32076	0.600215	0.548363	1	no
Kcnj13	chr1:89223572-89347385	GF_Ileum	CV_Ileum	0.829248	1.34881	0.701816	-0.0723111	0.942354	0.999999	no
Ngef	chr1:89373399-89470445	GF_Ileum	CV_Ileum	26.4573	20.8056	-0.346697	0.600028	0.548488	0.97561	no
Usp40	chr1:89749858-89905128	GF_Ileum	CV_Ileum	6.27295	6.13033	-0.0331809	0.0120949	0.99035	0.999999	no
Dnajb3	chr1:89951985-90116577	GF_Ileum	CV_Ileum	1.47699	2.1894	0.567877	-0.043089	0.965631	0.999999	no
Ugt1a10	chr1:89951985-90116577	GF_Ileum	CV_Ileum	1.33069	1.97159	0.567186	-0.165376	0.868648	0.999999	no
A730008H23Rik,Hjurp	chr1:90123594-90174235	GF_Ileum	CV_Ileum	66.0703	58.5067	-0.1754	0.261556	0.793664	0.999999	no
Glrp1	chr1:90396445-90406641	GF_Ileum	CV_Ileum	0	0.00612518	1.79769e+308	1.79769e+308	0.267392	1	no
Arl4c	chr1:90594800-90598766	GF_Ileum	CV_Ileum	0.0697017	0.139169	0.997577	-1.01544	0.309894	1	no
-	chr1:90876376-90878586	GF_Ileum	CV_Ileum	0.43355	0.375886	-0.205904	0.241953	0.808816	0.999999	no
-	chr1:90897763-90912670	GF_Ileum	CV_Ileum	1.52954	1.85083	0.275068	-0.221617	0.824612	0.999999	no
C030007H22Rik	chr1:91256916-91302708	GF_Ileum	CV_Ileum	0	0	0	0	1	1	no
4933400F21Rik	chr1:91351385-91802269	GF_Ileum	CV_Ileum	0.0443826	0.0102716	-2.11133	0.171534	0.863804	1	no
Gbx2	chr1:91824536-91827751	GF_Ileum	CV_Ileum	0	0	0	0	1	1	no
Asb18	chr1:91849252-91911152	GF_Ileum	CV_Ileum	0	0	0	0	1	1	no
Iqca	chr1:91938706-92049976	GF_Ileum	CV_Ileum	0	0	0	0	1	1	no
Col6a3	chr1:92663434-92740548	GF_Ileum	CV_Ileum	0.0040687	0.000921436	-2.14261	0.31246	0.754691	1	no
Rab17	chr1:92854706-92866364	GF_Ileum	CV_Ileum	65.6749	57.1115	-0.201561	0.421544	0.673358	0.999999	no
Ilkap	chr1:93272346-93295400	GF_Ileum	CV_Ileum	23.1623	18.1983	-0.34797	0.675925	0.499088	0.952181	no
1700020N18Rik	chr1:93301456-93302606	GF_Ileum	CV_Ileum	0	0	0	0	1	1	no
Hes6	chr1:93308059-93355905	GF_Ileum	CV_Ileum	51.1545	36.5739	-0.484049	0.615703	0.538091	0.971027	no
Per2	chr1:93308059-93355905	GF_Ileum	CV_Ileum	9.83667	10.1775	0.0491339	-0.0705523	0.943754	0.999999	no
Hdac4	chr1:93825354-94076857	GF_Ileum	CV_Ileum	4.44263	3.37841	-0.39507	0.846338	0.397364	0.888759	no
Ndufa10	chr1:94326784-94378140	GF_Ileum	CV_Ileum	80.8675	73.5322	-0.137184	0.268316	0.788456	0.999999	no
Olfr1416	chr1:94326784-94378140	GF_Ileum	CV_Ileum	0	0	0	0	1	1	no
Olfr1415	chr1:94387394-94388330	GF_Ileum	CV_Ileum	0	0	0	0	1	1	no
Olfr1414	chr1:94407624-94415092	GF_Ileum	CV_Ileum	0	0	0	0	1	1	no
Myeov2	chr1:94533721-94538562	GF_Ileum	CV_Ileum	70.5537	76.2942	0.112851	-0.242879	0.808099	0.999999	no
Otos	chr1:94540794-94545418	GF_Ileum	CV_Ileum	0	0	0	0	1	1	no
Ankmy1	chr1:94766705-94799483	GF_Ileum	CV_Ileum	0.00877686	0.0121349	0.467387	-0.208769	0.834629	1	no
9430060I03Rik	chr1:94830119-94886078	GF_Ileum	CV_Ileum	0.147712	0.143979	0	0	1	1	no
Kif1a	chr1:94912032-94998442	GF_Ileum	CV_Ileum	0.0822879	0.0537393	-0.614701	0.733969	0.462967	1	no
2310007B03Rik	chr1:95047931-95057525	GF_Ileum	CV_Ileum	9.05238	7.6473	-0.243345	0.452403	0.650979	0.999999	no
Mterfd2	chr1:95132419-95202595	GF_Ileum	CV_Ileum	3.39592	3.14241	-0.11193	0.165293	0.868714	0.999999	no
Pask	chr1:95205387-95268644	GF_Ileum	CV_Ileum	1.10824	1.14102	0.0420584	-0.0201851	0.983896	0.999999	no
Hdlbp	chr1:95270318-95375385	GF_Ileum	CV_Ileum	79.348	66.262	-0.260012	0.445999	0.655598	0.999999	no
Farp2	chr1:95408669-95551824	GF_Ileum	CV_Ileum	6.97564	8.62661	0.306468	-0.200445	0.841132	0.999999	no
Stk25	chr1:95408669-95551824	GF_Ileum	CV_Ileum	119.512	121.096	0.0189988	-0.0216329	0.982741	0.999999	no
Thap4	chr1:95601964-95686106	GF_Ileum	CV_Ileum	41.1964	32.7555	-0.330782	0.398595	0.690192	0.999999	no
Dtymk	chr1:95687750-95698511	GF_Ileum	CV_Ileum	19.623	14.152	-0.471542	0.647485	0.517318	0.961019	no
Pdcd1	chr1:95934881-95949130	GF_Ileum	CV_Ileum	0.0137343	0.0411831	1.58427	-0.713872	0.475307	1	no
St8sia4	chr1:97484258-97564171	GF_Ileum	CV_Ileum	0.0588526	0.134521	1.19265	-1.12992	0.25851	1	no
4930598F16Rik	chr1:97597760-97613095	GF_Ileum	CV_Ileum	0	0	0	0	1	1	no
1700063A18Rik	chr1:97887235-97918335	GF_Ileum	CV_Ileum	0	0	0	0	1	1	no
4930533P14Rik	chr1:98508633-98559150	GF_Ileum	CV_Ileum	0	0	0	0	1	1	no
Slco4c1	chr1:98715360-98768748	GF_Ileum	CV_Ileum	0	0.00490438	1.79769e+308	1.79769e+308	0.267392	1	no
Slco6b1	chr1:98802752-98894137	GF_Ileum	CV_Ileum	0	0	0	0	1	1	no
Slco6c1	chr1:98956025-99024880	GF_Ileum	CV_Ileum	0	0	0	0	1	1	no
D1Ertd622e	chr1:99540478-99558595	GF_Ileum	CV_Ileum	26.8396	27.0948	0.0136499	-0.0296114	0.976377	0.999999	no
Ppip5k2	chr1:99602622-99689808	GF_Ileum	CV_Ileum	23.6826	28.7653	0.280499	-0.597832	0.549952	0.976393	no
Pam	chr1:99717645-99992210	GF_Ileum	CV_Ileum	9.48549	7.95935	-0.253071	0.496269	0.619705	0.999999	no
B230216N24Rik	chr1:99717645-99992210	GF_Ileum	CV_Ileum	0.610239	0.695377	0.188422	-0.0466898	0.96276	0.999999	no
Cdh20	chr1:106665395-106910309	GF_Ileum	CV_Ileum	6.62255	7.91765	0.257685	-0.483271	0.628903	0.999999	no
-	chr1:106924841-107054452	GF_Ileum	CV_Ileum	7.79407	11.0883	0.508589	-0.717987	0.472765	0.939769	no
-	chr1:106924841-107054452	GF_Ileum	CV_Ileum	0.877613	1.37022	0.642746	-0.148951	0.881592	0.999999	no
Rnf152	chr1:107173493-107253287	GF_Ileum	CV_Ileum	22.4103	33.1433	0.564553	-1.22921	0.218994	0.686877	no
Pign	chr1:107410490-107560355	GF_Ileum	CV_Ileum	4.80241	5.08127	0.0814306	-0.143052	0.886249	0.999999	no
Tnfrsf11a	chr1:107677284-107753002	GF_Ileum	CV_Ileum	0.491021	0	-1.79769e+308	-1.79769e+308	0.22679	0.699285	no
-	chr1:107876084-107930954	GF_Ileum	CV_Ileum	0.354562	0.206416	-0.780481	0.118558	0.905625	1	no
LOC626049	chr1:108049201-108068101	GF_Ileum	CV_Ileum	0.270959	0.0497268	-2.44598	1.12622	0.260074	1	no
Bcl2	chr1:108434755-108610867	GF_Ileum	CV_Ileum	3.05607	2.48089	-0.300818	0.501341	0.616131	0.999999	no
Kdsr	chr1:108616986-108656319	GF_Ileum	CV_Ileum	5.67002	4.57303	-0.310204	0.607138	0.543759	0.973334	no
Vps4b	chr1:108666129-108695817	GF_Ileum	CV_Ileum	47.8276	49.5923	0.0522732	-0.104755	0.91657	0.999999	no
Serpinb3a	chr1:108942163-108948880	GF_Ileum	CV_Ileum	0	0	0	0	1	1	no
Serpinb3d	chr1:108974769-108980057	GF_Ileum	CV_Ileum	0	0	0	0	1	1	no
Serpinb3b	chr1:109050537-109057691	GF_Ileum	CV_Ileum	0	0	0	0	1	1	no
Serpinb3c	chr1:109167777-109174948	GF_Ileum	CV_Ileum	0	0	0	0	1	1	no
-	chr1:110471732-110489413	GF_Ileum	CV_Ileum	0.670011	0.714286	0.0923176	-0.089711	0.928517	0.999999	no
Cdh19	chr1:112785771-112873949	GF_Ileum	CV_Ileum	0	0	0	0	1	1	no
Dsel	chr1:113755278-113761495	GF_Ileum	CV_Ileum	0.40942	0.421469	0.0418452	-0.0490087	0.960912	0.999999	no
Tsn	chr1:120189128-120207880	GF_Ileum	CV_Ileum	19.3527	16.2328	-0.253622	0.367487	0.713256	0.999999	no
2900060B14Rik	chr1:120285634-120508173	GF_Ileum	CV_Ileum	0.0290724	0.0490519	0.754658	-0.0349452	0.972123	1	no
Clasp1	chr1:120285634-120508173	GF_Ileum	CV_Ileum	0.699834	0	-1.79769e+308	-1.79769e+308	0.163332	0.590109	no
Tcfcp2l1	chr1:120524521-120581746	GF_Ileum	CV_Ileum	7.16224	0	-1.79769e+308	-1.79769e+308	0.00984717	0.0912772	no
Gli2	chr1:120730637-120950196	GF_Ileum	CV_Ileum	0	0.00165268	1.79769e+308	1.79769e+308	0.267392	1	no
Inhbb	chr1:121312041-121318825	GF_Ileum	CV_Ileum	0.0117784	0.00533603	-1.1423	0.479903	0.631296	1	no
Ralb	chr1:121366843-121401359	GF_Ileum	CV_Ileum	44.4006	36.2203	-0.29378	0.636563	0.52441	0.964787	no
Tmem185b	chr1:121416676-121434161	GF_Ileum	CV_Ileum	2.85043	0.0918356	-4.95598	0.700582	0.483564	0.944993	no
Epb4.1l5	chr1:121441609-121545577	GF_Ileum	CV_Ileum	6.1441	6.05833	-0.0202816	0.038412	0.969359	0.999999	no
Ptpn4	chr1:121549041-121733986	GF_Ileum	CV_Ileum	1.16408	1.44436	0.311246	-0.609521	0.542179	0.972438	no
Tmem177	chr1:121793589-121809745	GF_Ileum	CV_Ileum	3.76482	1.80843	-1.05784	0.668935	0.503537	0.954125	no
Gm101	chr1:121820095-121891787	GF_Ileum	CV_Ileum	0	0	0	0	1	1	no
Tmem37	chr1:121903556-121970609	GF_Ileum	CV_Ileum	31.2272	17.5053	-0.835013	1.53954	0.123672	0.505331	no
Dbi	chr1:122004027-122017673	GF_Ileum	CV_Ileum	567.033	616.427	0.120498	-0.252558	0.80061	0.999999	no
3110009E18Rik	chr1:122017763-122086341	GF_Ileum	CV_Ileum	0.100926	0.132825	0.396226	-0.235654	0.813701	1	no
Steap3	chr1:122122992-122167659	GF_Ileum	CV_Ileum	7.91779	4.21642	-0.909079	1.75932	0.0785227	0.385704	no
Marco	chr1:122371114-122401661	GF_Ileum	CV_Ileum	0	0	0	0	1	1	no
Insig2	chr1:123200929-123233949	GF_Ileum	CV_Ileum	21.3788	22.9963	0.105225	-0.235109	0.814124	0.999999	no
Htr5b	chr1:123406349-123425042	GF_Ileum	CV_Ileum	0	0	0	0	1	1	no
Ddx18	chr1:123450366-123464557	GF_Ileum	CV_Ileum	8.67403	6.83757	-0.34322	0.728548	0.466278	0.936549	no
Dpp10	chr1:125228714-125942136	GF_Ileum	CV_Ileum	0.00937033	0	-1.79769e+308	-1.79769e+308	0.218314	1	no
Actr3	chr1:127289481-127332304	GF_Ileum	CV_Ileum	179.311	211.227	0.236334	-0.441111	0.659132	0.999999	no
Lypd1	chr1:127573540-127808791	GF_Ileum	CV_Ileum	0.0602961	1.67007	4.7917	-0.469485	0.638723	0.999999	no
Nckap5	chr1:127810110-128727209	GF_Ileum	CV_Ileum	3.06849	3.46349	0.174696	-0.311566	0.75537	0.999999	no
Tmem163	chr1:129386918-129574598	GF_Ileum	CV_Ileum	0.0434215	0.0658216	0.600151	-0.44987	0.652804	1	no
Ysk4	chr1:129711847-129736867	GF_Ileum	CV_Ileum	0	0	0	0	1	1	no
Zranb3	chr1:129850762-129998985	GF_Ileum	CV_Ileum	0.728181	0.532889	-0.450463	0.647937	0.517026	0.960798	no
Lct	chr1:130181340-130224895	GF_Ileum	CV_Ileum	1.94306	3.67408	0.91905	-1.76633	0.0773398	0.381946	no
Mcm6	chr1:130228166-130256276	GF_Ileum	CV_Ileum	18.6173	10.7943	-0.786368	1.76255	0.0779758	0.38398	no
Dars	chr1:130260283-130313993	GF_Ileum	CV_Ileum	16.1974	15.148	-0.096627	0.219914	0.825938	0.999999	no
Cxcr4	chr1:130484775-130488876	GF_Ileum	CV_Ileum	0.0147121	0.0416096	1.49992	-0.677724	0.497947	1	no
Daf2	chr1:132285104-132319576	GF_Ileum	CV_Ileum	0.540269	0.341093	-0.663514	0.782251	0.434067	0.915546	no
Cd55	chr1:132320313-132359324	GF_Ileum	CV_Ileum	23.625	28.0241	0.246355	-0.36813	0.712776	0.999999	no
Zp3r	chr1:132473282-132526183	GF_Ileum	CV_Ileum	0	0	0	0	1	1	no
C4bp	chr1:132531452-132558235	GF_Ileum	CV_Ileum	1.56912	0.996749	-0.654655	0.753774	0.450985	0.926527	no
C4bp-ps1	chr1:132566778-132578148	GF_Ileum	CV_Ileum	2.62086	1.37623	-0.92932	0.90232	0.366887	0.862986	no
Pfkfb2	chr1:132585619-132625830	GF_Ileum	CV_Ileum	16.3315	16.2772	-0.00479866	0.00850145	0.993217	0.999999	no
AA986860	chr1:132628552-132660945	GF_Ileum	CV_Ileum	3.91603	4.28478	0.129831	-0.0694551	0.944627	0.999999	no
Fcamr	chr1:132697478-132717568	GF_Ileum	CV_Ileum	0.737377	1.03417	0.488002	-0.228633	0.819155	0.999999	no
Il24	chr1:132778650-132783988	GF_Ileum	CV_Ileum	0	0	0	0	1	1	no
Il20	chr1:132803768-132807873	GF_Ileum	CV_Ileum	0	0	0	0	1	1	no
Il19	chr1:132829232-132835818	GF_Ileum	CV_Ileum	0	0	0	0	1	1	no
Mapkapk2	chr1:132950276-133010348	GF_Ileum	CV_Ileum	33.0312	25.5259	-0.371868	0.811047	0.417338	0.903547	no
Dyrk3	chr1:133025017-133034811	GF_Ileum	CV_Ileum	0.663624	0.437923	-0.59969	0.848326	0.396257	0.88797	no
Rassf5	chr1:133049783-133141755	GF_Ileum	CV_Ileum	0.737916	0.876016	0.247501	-0.118267	0.905856	0.999999	no
Ikbke	chr1:133151076-133176359	GF_Ileum	CV_Ileum	40.9877	34.4625	-0.250164	0.360595	0.718402	0.999999	no
Srgap2	chr1:133181827-133423938	GF_Ileum	CV_Ileum	1.19983	1.07988	-0.151966	0.196576	0.844159	0.999999	no
Mfsd4	chr1:133904181-133964639	GF_Ileum	CV_Ileum	5.44578	8.77376	0.688058	-0.525572	0.599186	0.995836	no
Cdk18	chr1:134010123-134036288	GF_Ileum	CV_Ileum	53.0509	48.7165	-0.122968	0.263711	0.792002	0.999999	no
Tmcc2	chr1:134252891-134287858	GF_Ileum	CV_Ileum	0.00371605	0.00902024	1.2794	-0.431127	0.666376	1	no
Cntn2	chr1:134406001-134439517	GF_Ileum	CV_Ileum	1.12e-05	0.00115275	6.69189	-0.256208	0.79779	1	no
Nfasc	chr1:134461266-134638374	GF_Ileum	CV_Ileum	0.133785	0.128447	-0.0587448	0.0676463	0.946067	1	no
Mdm4	chr1:134859710-134921953	GF_Ileum	CV_Ileum	20.8211	24.6286	0	0	1	1	no
Gm19461	chr1:135060302-135200032	GF_Ileum	CV_Ileum	0.122224	0.0873575	-0.484528	0.0433203	0.965446	1	no
Plekha6	chr1:135060302-135200032	GF_Ileum	CV_Ileum	8.51362	0	-1.79769e+308	-1.79769e+308	0.142444	0.547819	no
Sox13	chr1:135278784-135321065	GF_Ileum	CV_Ileum	51.5695	40.6792	-0.342226	0.629188	0.529226	0.966947	no
Snrpe	chr1:135500447-135506857	GF_Ileum	CV_Ileum	82.2693	70.1671	-0.22956	0.511713	0.608852	0.998583	no
Zbed6,Zc3h11a	chr1:135516394-135557959	GF_Ileum	CV_Ileum	38.186	35.6794	-0.0979492	0.178739	0.858142	0.999999	no
Lax1	chr1:135575605-135586685	GF_Ileum	CV_Ileum	0.02741	0.149119	2.44369	-1.29885	0.193997	1	no
Atp2b4	chr1:135599650-135697319	GF_Ileum	CV_Ileum	0.0301111	0.0850438	1.49791	-1.35713	0.17474	1	no
Optc	chr1:135793770-135804576	GF_Ileum	CV_Ileum	0.0250332	0	-1.79769e+308	-1.79769e+308	0.29119	1	no
Prelp	chr1:135806877-135817978	GF_Ileum	CV_Ileum	2.81514	1.20112	-1.22883	2.23312	0.0255411	0.182886	no
-	chr1:135956497-135966638	GF_Ileum	CV_Ileum	1.48213	1.15944	-0.354233	0.290454	0.771469	0.999999	no
Btg2	chr1:135971441-135983899	GF_Ileum	CV_Ileum	38.3406	33.1503	-0.209852	0.448129	0.65406	0.999999	no
Adora1	chr1:136090024-136132008	GF_Ileum	CV_Ileum	0.263447	0.242011	-0.122442	0.140424	0.888325	1	no
Ppfia4	chr1:136192617-136229505	GF_Ileum	CV_Ileum	0.422031	0.479122	0.183044	-0.188758	0.850283	0.999999	no
Tmem183a	chr1:136242601-136258604	GF_Ileum	CV_Ileum	63.8002	64.5883	0.0177108	-0.0339698	0.972901	0.999999	no
4931440L10Rik	chr1:136437521-136443599	GF_Ileum	CV_Ileum	0	0	0	0	1	1	no
Ppp1r12b	chr1:136651208-136852517	GF_Ileum	CV_Ileum	4.27441	4.3126	0.0128345	-0.0180961	0.985562	0.999999	no
Lgr6	chr1:136882929-137001853	GF_Ileum	CV_Ileum	0	0.00279419	1.79769e+308	1.79769e+308	0.293259	1	no
Ptprv	chr1:137005074-137029152	GF_Ileum	CV_Ileum	0	0.00927067	1.79769e+308	1.79769e+308	0.0822638	1	no
Gpr37l1	chr1:137056826-137064258	GF_Ileum	CV_Ileum	0.0115895	0.0137362	0.245167	-0.0993265	0.920879	1	no
Elf3	chr1:137150150-137155049	GF_Ileum	CV_Ileum	126.259	87.0968	-0.535697	1.05247	0.292584	0.785953	no
Rnpep	chr1:137159275-137183755	GF_Ileum	CV_Ileum	96.313	68.3139	-0.495552	0.886922	0.375121	0.87069	no
Timm17a	chr1:137198111-137215724	GF_Ileum	CV_Ileum	36.6838	35.1159	-0.0630198	0.141893	0.887165	0.999999	no
Shisa4	chr1:137268032-137271640	GF_Ileum	CV_Ileum	0.0492581	0	-1.79769e+308	-1.79769e+308	0.145087	1	no
Ipo9	chr1:137278663-137327068	GF_Ileum	CV_Ileum	3.88897	3.09448	-0.329689	0.649907	0.515752	0.960255	no
Nav1	chr1:137331156-137481932	GF_Ileum	CV_Ileum	0.533627	0.407889	-0.387654	0.632221	0.527243	0.966374	no
Pkp1	chr1:137767971-137815895	GF_Ileum	CV_Ileum	7.59384	4.79629	-0.66291	1.33029	0.183424	0.628188	no
Igfn1	chr1:137850154-137902919	GF_Ileum	CV_Ileum	0.00418805	0.00101823	-2.04021	0.292728	0.76973	1	no
-	chr1:138077956-138105579	GF_Ileum	CV_Ileum	4.21299	3.61184	-0.222109	0.150291	0.880535	0.999999	no
5730559C18Rik	chr1:138110044-138130857	GF_Ileum	CV_Ileum	41.0349	30.6633	-0.420339	0.766118	0.443606	0.921978	no
Gpr25	chr1:138155490-138157450	GF_Ileum	CV_Ileum	0	0.00854911	1.79769e+308	1.79769e+308	0.293259	1	no
Camsap1l1	chr1:138164699-138242695	GF_Ileum	CV_Ileum	0.477539	0.360267	-0.406552	0.543878	0.586525	0.991797	no
9230116N13Rik	chr1:138308492-138336797	GF_Ileum	CV_Ileum	0.119756	0.0602284	-0.991584	0.47282	0.636342	1	no
Nr5a2	chr1:138739127-138857345	GF_Ileum	CV_Ileum	13.4278	12.8116	-0.0677722	0.139647	0.888939	0.999999	no
Ptprc	chr1:139959437-140072290	GF_Ileum	CV_Ileum	0.912505	2.00347	1.13459	-1.76243	0.0779966	0.384046	no
Nek7	chr1:140380408-140516339	GF_Ileum	CV_Ileum	2.24852	2.9265	0.380201	-0.703546	0.481715	0.944532	no
Gm5833	chr1:140536671-140578652	GF_Ileum	CV_Ileum	0	0	0	0	1	1	no
Lhx9	chr1:140721762-140744156	GF_Ileum	CV_Ileum	0.00898973	0.00247223	-1.86246	0.313976	0.753539	1	no
2310009B15Rik	chr1:140748555-140753431	GF_Ileum	CV_Ileum	5.07734	5.70439	0.168	-0.269371	0.787644	0.999999	no
Crb1	chr1:141094830-141273653	GF_Ileum	CV_Ileum	0.00265322	0.022931	3.11148	-1.15064	0.249879	1	no
Cfhr1	chr1:141443640-141456799	GF_Ileum	CV_Ileum	0.00774586	0.0168273	1.11931	-0.376406	0.706615	1	no
Gm4788	chr1:141594495-141677816	GF_Ileum	CV_Ileum	0	0	0	0	1	1	no
Cfhr2	chr1:141706868-141755276	GF_Ileum	CV_Ileum	0	0.0105718	1.79769e+308	1.79769e+308	0.220895	1	no
Cfh	chr1:141982431-142079988	GF_Ileum	CV_Ileum	0.00286711	0.00209469	-0.452866	0.123865	0.901422	1	no
4930590L20Rik	chr1:142142833-142552979	GF_Ileum	CV_Ileum	0	0.0247183	1.79769e+308	1.79769e+308	0.377235	1	no
Cdc73	chr1:145445642-145549954	GF_Ileum	CV_Ileum	9.80694	8.14816	-0.267329	0.471974	0.636945	0.999999	no
Trove2	chr1:145597920-145624181	GF_Ileum	CV_Ileum	0.722301	0.895303	0.309775	-0.57545	0.564987	0.983219	no
Rgs2	chr1:145846467-145851279	GF_Ileum	CV_Ileum	18.0917	12.0951	-0.580908	1.25373	0.209939	0.673015	no
Rgs13	chr1:145984290-146024502	GF_Ileum	CV_Ileum	4.67573	7.3054	0.643772	-1.02999	0.303015	0.797482	no
Rgs1	chr1:146091798-146096234	GF_Ileum	CV_Ileum	0.296011	0.919982	1.63596	-1.6346	0.102133	0.453574	no
Rgs18	chr1:146599970-146622551	GF_Ileum	CV_Ileum	0	0.0117421	1.79769e+308	1.79769e+308	0.201721	1	no
Pla2g4a	chr1:151676751-151808414	GF_Ileum	CV_Ileum	2.86973	2.08721	-0.459337	0.762995	0.445466	0.923108	no
7530420F21Rik	chr1:151923790-151946896	GF_Ileum	CV_Ileum	0	0	0	0	1	1	no
2310030A07Rik	chr1:152166546-152193901	GF_Ileum	CV_Ileum	0	0	0	0	1	1	no
BC003331	chr1:152208440-152313295	GF_Ileum	CV_Ileum	7.31949	8.94957	0.290076	-0.294133	0.768656	0.999999	no
Prg4	chr1:152208440-152313295	GF_Ileum	CV_Ileum	0.168974	0.428992	1.34415	-0.15579	0.876198	0.999999	no
Hmcn1	chr1:152409631-152840565	GF_Ileum	CV_Ileum	0.00182365	0.00109674	-0.733609	0.17257	0.862989	1	no
1200016B10Rik	chr1:153214828-153275565	GF_Ileum	CV_Ileum	5.01473	5.88748	0.231479	-0.503151	0.614858	0.999999	no
Rnf2	chr1:153316535-153347953	GF_Ileum	CV_Ileum	5.91882	5.82926	-0.0219979	0.0467519	0.962711	0.999999	no
1700025G04Rik	chr1:153731653-153937450	GF_Ileum	CV_Ileum	4.33618	3.57093	-0.280126	0.6203	0.535061	0.969594	no
Tsen15	chr1:154217865-154233812	GF_Ileum	CV_Ileum	3.6776	2.93027	-0.327731	0.420816	0.673889	0.999999	no
Rgl1	chr1:154364659-154472241	GF_Ileum	CV_Ileum	0.112264	0.0269886	-2.05647	1.95129	0.0510228	1	no
Smg7	chr1:154654821-154750304	GF_Ileum	CV_Ileum	9.9956	10.2385	0.0346345	-0.0708741	0.943498	0.999999	no
Lamc2	chr1:154969885-155033577	GF_Ileum	CV_Ileum	6.42463	4.82211	-0.413947	0.933347	0.350641	0.848704	no
Lamc1	chr1:155066051-155179916	GF_Ileum	CV_Ileum	1.41556	0.892019	-0.666224	1.30625	0.191469	0.642291	no
E330020D12Rik	chr1:155251315-155261363	GF_Ileum	CV_Ileum	6.16318	7.88499	0.355433	-0.765368	0.444052	0.922097	no
Dhx9	chr1:155302887-155334805	GF_Ileum	CV_Ileum	35.1282	32.0892	-0.130542	0.282115	0.777856	0.999999	no
Rgsl1	chr1:155626516-155691271	GF_Ileum	CV_Ileum	0.00693738	0.00566312	-0.292794	0.110547	0.911976	1	no
5830403L16Rik	chr1:155696671-155698325	GF_Ileum	CV_Ileum	0	0	0	0	1	1	no
Gm5531	chr1:155721474-155724001	GF_Ileum	CV_Ileum	0.505385	0	-1.79769e+308	-1.79769e+308	0.35952	0.856224	no
4930452N14Rik	chr1:156088650-156104036	GF_Ileum	CV_Ileum	0	0	0	0	1	1	no
Cacna1e	chr1:156237886-156573050	GF_Ileum	CV_Ileum	0.00285766	0.00982392	1.78146	-0.680714	0.496053	1	no
-	chr1:156910095-156930540	GF_Ileum	CV_Ileum	0.650562	0.946108	0.540319	-0.589616	0.555448	0.97892	no
Ier5	chr1:156930785-156946766	GF_Ileum	CV_Ileum	27.7661	28.7875	0.0521156	-0.072375	0.942303	0.999999	no
Mr1	chr1:156975007-156993910	GF_Ileum	CV_Ileum	0.020454	0.0468443	1.19549	-0.699357	0.484329	1	no
Xpr1	chr1:157122738-157264574	GF_Ileum	CV_Ileum	12.9902	16.3656	0.333244	-0.691207	0.489435	0.947803	no
-	chr1:157274017-157285615	GF_Ileum	CV_Ileum	0.155916	0.153392	-0.0235489	0.0146013	0.98835	1	no
Lhx4	chr1:157548823-157589157	GF_Ileum	CV_Ileum	0	0	0	0	1	1	no
Qsox1	chr1:157625284-157660029	GF_Ileum	CV_Ileum	47.3519	27.0286	-0.808936	1.64425	0.100125	0.448079	no
Cep350	chr1:157692089-157820385	GF_Ileum	CV_Ileum	9.29987	9.31327	0.00207751	-0.00421911	0.996634	0.999999	no
Tor1aip1	chr1:157851728-157916311	GF_Ileum	CV_Ileum	8.83183	7.93078	0	0	1	1	no
Tor1aip2	chr1:157851728-157916311	GF_Ileum	CV_Ileum	20.3827	0	0	0	1	1	no
Fam163a	chr1:157923095-158135156	GF_Ileum	CV_Ileum	0	0	0	0	1	1	no
Tdrd5	chr1:158185425-158233479	GF_Ileum	CV_Ileum	0.00735456	0.00559648	-0.394119	0.148023	0.882325	1	no
Soat1	chr1:158354678-158404593	GF_Ileum	CV_Ileum	2.52307	1.8243	-0.467836	0.797162	0.425357	0.909244	no
Tor3a	chr1:158583693-158604470	GF_Ileum	CV_Ileum	3.63161	3.06387	-0.245251	0.493249	0.621837	0.999999	no
Fam20b	chr1:158608672-158649226	GF_Ileum	CV_Ileum	44.8724	41.9014	-0.0988304	0.192026	0.847722	0.999999	no
1700057K13Rik	chr1:159029278-159038776	GF_Ileum	CV_Ileum	0	0	0	0	1	1	no
Rasal2	chr1:159065313-159350367	GF_Ileum	CV_Ileum	0.776748	0.787335	0.0195297	-0.0348256	0.972219	0.999999	no
Fam5b	chr1:160175399-160286391	GF_Ileum	CV_Ileum	0	0	0	0	1	1	no
Pappa2	chr1:160641861-160887569	GF_Ileum	CV_Ileum	0.0104871	0.00323148	-1.69835	0.899686	0.368287	1	no
4930562F07Rik	chr1:161974510-162008770	GF_Ileum	CV_Ileum	0.131383	0.130303	-0.0119109	0.00255552	0.997961	1	no
Tnn	chr1:162015162-162083706	GF_Ileum	CV_Ileum	0.00426202	0.00737629	0.791358	-0.340741	0.733299	1	no
Cacybp	chr1:162132497-162143023	GF_Ileum	CV_Ileum	10.0365	10.8449	0.111758	-0.242944	0.808049	0.999999	no
Rabgap1l	chr1:162149302-162723588	GF_Ileum	CV_Ileum	6.61653	7.6757	0.214224	-0.386754	0.698938	0.999999	no
Gpr52	chr1:162149302-162723588	GF_Ileum	CV_Ileum	0.0797842	0.17616	1.14272	-0.115842	0.907778	1	no
Zbtb37	chr1:162933326-162968805	GF_Ileum	CV_Ileum	0.645267	0.880594	0.44858	-0.443159	0.65765	0.999999	no
Dars2	chr1:162968942-163016646	GF_Ileum	CV_Ileum	5.20261	4.24319	-0.294084	0.47926	0.631754	0.999999	no
Klhl20	chr1:163018508-163061610	GF_Ileum	CV_Ileum	3.18238	3.14408	-0.0174696	0.0323955	0.974157	0.999999	no
4930469G21Rik	chr1:163072842-163100638	GF_Ileum	CV_Ileum	0	0	0	0	1	1	no
Prdx6	chr1:163170242-163181326	GF_Ileum	CV_Ileum	56.7515	37.7331	-0.588827	1.25434	0.209717	0.672762	no
-	chr1:163692526-163697294	GF_Ileum	CV_Ileum	0.612476	1.28721	1.07152	-0.437862	0.661486	0.999999	no
Fasl	chr1:163710822-163718626	GF_Ileum	CV_Ileum	0.0749049	0.177364	1.24358	-0.897199	0.369613	1	no
AI848100	chr1:163746242-163807060	GF_Ileum	CV_Ileum	7.57621	7.80501	0.0429235	-0.0767081	0.938856	0.999999	no
4930558K02Rik	chr1:163872219-163909767	GF_Ileum	CV_Ileum	0	0	0	0	1	1	no
Dnm3	chr1:163917432-164408165	GF_Ileum	CV_Ileum	0.0108701	0.0173563	0.675096	-0.263829	0.791912	1	no
Mettl13	chr1:164462316-164478645	GF_Ileum	CV_Ileum	1.95946	1.2146	-0.689981	0.996236	0.319135	0.815745	no
7420461P10Rik	chr1:164569280-164588350	GF_Ileum	CV_Ileum	0	0	0	0	1	1	no
Prrc2c	chr1:164601000-164670687	GF_Ileum	CV_Ileum	11.9007	13.6668	0.199632	-0.406544	0.684343	0.999999	no
Fmo4	chr1:164721979-164744188	GF_Ileum	CV_Ileum	29.8877	30.4897	0.0287689	-0.0480944	0.961641	0.999999	no
Fmo1	chr1:164759691-164796679	GF_Ileum	CV_Ileum	0.589311	0.59204	0.00666479	-0.00945417	0.992457	0.999999	no
Fmo2	chr1:164804485-164828869	GF_Ileum	CV_Ileum	0.557244	0.510131	-0.127442	0.169732	0.865221	0.999999	no
Fmo6	chr1:164846681-164867356	GF_Ileum	CV_Ileum	0	0	0	0	1	1	no
Fmo3	chr1:164883930-164914622	GF_Ileum	CV_Ileum	0	0	0	0	1	1	no
4921528O07Rik	chr1:164954432-165015801	GF_Ileum	CV_Ileum	0	0	0	0	1	1	no
Prrx1	chr1:165175249-165243781	GF_Ileum	CV_Ileum	0.150969	0.355767	1.23668	-1.46969	0.141646	0.545999	no
Gorab	chr1:165314928-165333917	GF_Ileum	CV_Ileum	3.77195	3.83151	0.0226004	-0.0359116	0.971353	0.999999	no
Mettl11b	chr1:165633123-165655363	GF_Ileum	CV_Ileum	0	0	0	0	1	1	no
BC055324	chr1:165859859-165924912	GF_Ileum	CV_Ileum	1.43728	1.2102	-0.248097	0.170185	0.864864	0.999999	no
Gm16548	chr1:166045394-166150405	GF_Ileum	CV_Ileum	0	0	0	0	1	1	no
Blzf1	chr1:166219930-166237649	GF_Ileum	CV_Ileum	3.5747	3.98485	0.156705	-0.272867	0.784955	0.999999	no
Atp1b1	chr1:166237805-166388486	GF_Ileum	CV_Ileum	876.204	851.719	-0.0408901	0.0497953	0.960285	0.999999	no
-	chr1:166635191-166642685	GF_Ileum	CV_Ileum	0.833633	0.96052	0.204404	-0.227897	0.819727	0.999999	no
-	chr1:166788637-166801657	GF_Ileum	CV_Ileum	0.0479665	0.263846	2.4596	-0.208914	0.834515	1	no
-	chr1:166811888-166815341	GF_Ileum	CV_Ileum	0.384742	0.583329	0.600419	-0.595502	0.551508	0.977179	no
Xcl1	chr1:166861778-166865641	GF_Ileum	CV_Ileum	0.357225	0.575089	0.686953	-0.556578	0.577816	0.98816	no
4930568G15Rik	chr1:166996747-167022061	GF_Ileum	CV_Ileum	0	0	0	0	1	1	no
Tbx19	chr1:167067983-167090904	GF_Ileum	CV_Ileum	0	0	0	0	1	1	no
Sft2d2	chr1:167104233-167124796	GF_Ileum	CV_Ileum	49.878	48.9304	-0.0276723	0.0568797	0.954641	0.999999	no
Tiprl	chr1:167142416-167167089	GF_Ileum	CV_Ileum	6.51992	6.82007	0.0649326	-0.142496	0.886688	0.999999	no
Dcaf6	chr1:167259631-167390679	GF_Ileum	CV_Ileum	10.6633	9.06174	-0.23479	0.345072	0.73004	0.999999	no
Mpzl1	chr1:167522311-167564672	GF_Ileum	CV_Ileum	14.2927	12.7372	-0.166237	0.325294	0.744958	0.999999	no
Rcsd1	chr1:167579075-167639403	GF_Ileum	CV_Ileum	0.102408	0.247912	1.2755	-1.13216	0.257566	1	no
Pou2f1	chr1:167718811-167932765	GF_Ileum	CV_Ileum	2.32582	1.83196	-0.344349	0.398585	0.690199	0.999999	no
-	chr1:167974674-167979639	GF_Ileum	CV_Ileum	0.0734977	0.126324	0.781359	-0.79853	0.424563	1	no
Dusp27	chr1:168028278-168058029	GF_Ileum	CV_Ileum	0.0247229	0.0289633	0.228379	-0.125664	0.899998	1	no
Mael	chr1:168131515-168168875	GF_Ileum	CV_Ileum	0	0	0	0	1	1	no
Pogk	chr1:168309297-168339959	GF_Ileum	CV_Ileum	1.57745	1.27548	-0.30656	0.434363	0.664025	0.999999	no
Gm4846	chr1:168413743-168427719	GF_Ileum	CV_Ileum	0	0	0	0	1	1	no
Gm4847	chr1:168559101-168577824	GF_Ileum	CV_Ileum	0	0.00402594	1.79769e+308	1.79769e+308	0.26205	1	no
Fmo9	chr1:168592185-168611976	GF_Ileum	CV_Ileum	0	0	0	0	1	1	no
Gm16701	chr1:168904153-168929861	GF_Ileum	CV_Ileum	0	0	0	0	1	1	no
Uck2	chr1:169153024-169215262	GF_Ileum	CV_Ileum	14.8769	8.55785	-0.797754	1.33833	0.18079	0.623609	no
Mgst3	chr1:169302514-169323928	GF_Ileum	CV_Ileum	460.652	362.262	-0.346644	0.794471	0.426921	0.910297	no
Lrrc52	chr1:169375805-169396911	GF_Ileum	CV_Ileum	0	0	0	0	1	1	no
Pbx1	chr1:170049494-170362389	GF_Ileum	CV_Ileum	9.47955	8.50679	-0.156204	0.28986	0.771923	0.999999	no
Nuf2	chr1:171428064-171461612	GF_Ileum	CV_Ileum	4.05011	3.75459	-0.109305	0.175249	0.860884	0.999999	no
Rgs4	chr1:171671607-171677773	GF_Ileum	CV_Ileum	0.217683	0.136065	-0.677934	0.792973	0.427794	1	no
Hsd17b7	chr1:171879667-171899336	GF_Ileum	CV_Ileum	18.293	16.1978	-0.175498	0.379853	0.704054	0.999999	no
Ddr2	chr1:171899529-172019075	GF_Ileum	CV_Ileum	0.00887232	0.00975339	0.136592	-0.0521381	0.958419	1	no
Uap1	chr1:172072083-172105099	GF_Ileum	CV_Ileum	76.8591	70.7278	-0.119939	0.225639	0.821482	0.999999	no
Uhmk1	chr1:172123404-172145618	GF_Ileum	CV_Ileum	20.4997	19.2281	-0.0923878	0.183903	0.854089	0.999999	no
Gm7694,Nos1ap	chr1:172225475-172519980	GF_Ileum	CV_Ileum	21.4676	23.5434	0.133166	-0.153036	0.87837	0.999999	no
Atf6	chr1:172631453-172798090	GF_Ileum	CV_Ileum	11.8433	13.3753	0	0	1	1	no
Dusp12	chr1:172803305-172816808	GF_Ileum	CV_Ileum	28.2585	26.3564	-0.100529	0.164992	0.86895	0.999999	no
Fcrlb	chr1:172837403-172843072	GF_Ileum	CV_Ileum	0.0109024	0.0203718	0.901923	-0.288579	0.772903	1	no
Fcrla	chr1:172847724-172857714	GF_Ileum	CV_Ileum	0.0291035	0.0193355	-0.58994	0.176414	0.859969	1	no
Fcgr2b	chr1:172890688-172906202	GF_Ileum	CV_Ileum	0.166802	0.148338	-0.169248	0.0849805	0.932277	1	no
Fcgr3	chr1:172981299-172989534	GF_Ileum	CV_Ileum	0.0549154	0.117755	1.10051	-0.729835	0.465491	1	no
Sdhc	chr1:173059287-173080734	GF_Ileum	CV_Ileum	134.372	144.718	0.107013	-0.249749	0.802781	0.999999	no
Pcp4l1	chr1:173103394-173126399	GF_Ileum	CV_Ileum	0.080801	0.046346	-0.801928	0.563262	0.573257	1	no
Tomm40l	chr1:173144100-173152989	GF_Ileum	CV_Ileum	5.28065	4.79043	-0.140559	0.20793	0.835284	0.999999	no
Fcer1g	chr1:173159702-173164480	GF_Ileum	CV_Ileum	1.02542	1.35219	0.399083	-0.476753	0.633538	0.999999	no
Ndufs2	chr1:173164990-173177243	GF_Ileum	CV_Ileum	143.72	113.258	-0.343653	0.787048	0.431254	0.913471	no
Ppox	chr1:173200458-173211475	GF_Ileum	CV_Ileum	12.2619	10.5514	-0.216747	0.262603	0.792856	0.999999	no
Usp21	chr1:173212083-173218126	GF_Ileum	CV_Ileum	10.4227	7.90039	-0.399726	0.772434	0.439857	0.919774	no
Ufc1	chr1:173218694-173225113	GF_Ileum	CV_Ileum	52.6134	50.2583	-0.0660674	0.152863	0.878506	0.999999	no
Nit1	chr1:173259275-173275787	GF_Ileum	CV_Ileum	30.6098	30.2865	-0.0153185	0.0235917	0.981178	0.999999	no
Klhdc9	chr1:173288579-173290929	GF_Ileum	CV_Ileum	1.07172	0.95191	-0.171031	0.255454	0.798372	0.999999	no
Itln1	chr1:173448254-173465425	GF_Ileum	CV_Ileum	845.771	349.879	-1.27341	2.44708	0.014402	0.120868	no
Ly9	chr1:173518743-173537491	GF_Ileum	CV_Ileum	0.0711145	0.125003	0.81375	-0.699302	0.484363	1	no
Slamf7	chr1:173562533-173583168	GF_Ileum	CV_Ileum	0.0246824	0.105446	2.09495	-1.62576	0.104001	1	no
Vangl2	chr1:173931137-173957414	GF_Ileum	CV_Ileum	0.137741	0.224616	0.705497	-0.728844	0.466097	1	no
Nhlh1	chr1:173982422-173987727	GF_Ileum	CV_Ileum	0.0225259	0.0383515	0.767697	-0.481165	0.630399	1	no
Ncstn	chr1:173996143-174052545	GF_Ileum	CV_Ileum	82.5832	60.8164	-0.441388	0.496922	0.619244	0.999999	no
Pea15a	chr1:174078145-174136912	GF_Ileum	CV_Ileum	2.3826	2.13007	-0.161636	0.0829907	0.933859	0.999999	no
Casq1	chr1:174140024-174150026	GF_Ileum	CV_Ileum	0.0503156	0.0116369	-2.1123	0.974686	0.329716	1	no
Atp1a4	chr1:174153638-174188555	GF_Ileum	CV_Ileum	0	0	0	0	1	1	no
Atp1a2	chr1:174201839-174228195	GF_Ileum	CV_Ileum	0.0258125	0.0149396	-0.788931	0.569038	0.56933	1	no
Kcnj9	chr1:174251163-174259394	GF_Ileum	CV_Ileum	0.00388466	0.00634562	0.707971	-0.227387	0.820123	1	no
Tagln2	chr1:174411816-174437506	GF_Ileum	CV_Ileum	141.111	0	-1.79769e+308	-1.79769e+308	0.198082	0.653704	no
4933439K11Rik	chr1:174451260-174480937	GF_Ileum	CV_Ileum	0.320018	0.373198	0.221786	-0.168394	0.866273	0.999999	no
Slamf8	chr1:174511507-174520699	GF_Ileum	CV_Ileum	0.00671548	0.01688	1.32975	-0.464955	0.641964	1	no
Fcrl6	chr1:174526770-174532682	GF_Ileum	CV_Ileum	0.328204	0.340737	0.0540663	-0.0647861	0.948344	0.999999	no
Dusp23	chr1:174560899-174563132	GF_Ileum	CV_Ileum	4.80114	3.61463	-0.409527	0.71729	0.473195	0.939968	no
Apcs	chr1:174824091-174825185	GF_Ileum	CV_Ileum	0	0	0	0	1	1	no
Olfr1408	chr1:175060413-175061346	GF_Ileum	CV_Ileum	0	0	0	0	1	1	no
Olfr1406	chr1:175113572-175114635	GF_Ileum	CV_Ileum	0	0	0	0	1	1	no
Fcer1a	chr1:175151401-175157360	GF_Ileum	CV_Ileum	0	0	0	0	1	1	no
Gm11062	chr1:175204591-175207887	GF_Ileum	CV_Ileum	19.3421	37.4857	0.954592	-1.89943	0.0575076	0.316876	no
Darc	chr1:175262016-175263634	GF_Ileum	CV_Ileum	0	0.0294245	1.79769e+308	1.79769e+308	0.157356	1	no
Cadm3	chr1:175264384-175297826	GF_Ileum	CV_Ileum	0	0.00440724	1.79769e+308	1.79769e+308	0.214505	1	no
BC094916	chr1:175451441-175466088	GF_Ileum	CV_Ileum	0.00226372	0.00408299	0.850933	-0.128392	0.897839	1	no
Pydc4	chr1:175522087-175529405	GF_Ileum	CV_Ileum	0.0457397	0.014055	-1.70237	0.772439	0.439854	1	no
AI607873	chr1:175653558-175671940	GF_Ileum	CV_Ileum	0.0036338	0.0197356	2.44125	-0.88652	0.375338	1	no
Ifi204	chr1:175677424-175697050	GF_Ileum	CV_Ileum	0	0.0101313	1.79769e+308	1.79769e+308	0.191089	1	no
Mndal	chr1:175787350-175810318	GF_Ileum	CV_Ileum	0.276862	0.838829	1.59921	-1.36779	0.171379	0.605791	no
Mnda	chr1:175826485-175843053	GF_Ileum	CV_Ileum	0.00135927	0.0071211	2.38927	-0.34873	0.727292	1	no
Ifi203	chr1:175850533-175872623	GF_Ileum	CV_Ileum	0.100593	0.283587	1.49526	-1.50314	0.132804	0.526763	no
Ifi202b	chr1:175892699-175912975	GF_Ileum	CV_Ileum	0	0	0	0	1	1	no
Ifi205	chr1:175942128-175961886	GF_Ileum	CV_Ileum	0.00149671	0.0252291	4.07522	-0.6291	0.529284	1	no
Olfr231	chr1:176047221-176048178	GF_Ileum	CV_Ileum	0	0	0	0	1	1	no
Olfr419	chr1:176180019-176181107	GF_Ileum	CV_Ileum	0	0	0	0	1	1	no
Grem2	chr1:176763915-176851950	GF_Ileum	CV_Ileum	0.0033664	0.00246082	-0.452066	0.123646	0.901595	1	no
Rgs7	chr1:176989206-177422676	GF_Ileum	CV_Ileum	0.134986	0.113068	-0.255624	0.247365	0.804626	1	no
Fh1	chr1:177531508-177555766	GF_Ileum	CV_Ileum	51.8844	42.8403	-0.276333	0.586097	0.55781	0.979937	no
Chml,Opn3	chr1:177592558-177622801	GF_Ileum	CV_Ileum	1.98448	1.85457	-0.0976759	0.126105	0.899649	0.999999	no
Pld5	chr1:177892436-178205443	GF_Ileum	CV_Ileum	0.0038881	0.0300268	2.94911	-0.362875	0.716698	1	no
Cep170	chr1:178663783-178737255	GF_Ileum	CV_Ileum	0.0851371	0.084151	-0.0168071	0.0201765	0.983903	1	no
Mir350	chr1:178663783-178737255	GF_Ileum	CV_Ileum	0	0	0	0	1	1	no
Hmga2-ps1	chr1:178744942-179178999	GF_Ileum	CV_Ileum	0.0592282	0.0387153	-0.613381	0.0992915	0.920907	1	no
Akt3	chr1:178744942-179178999	GF_Ileum	CV_Ileum	0.0904857	0.126721	0.4859	-0.0820375	0.934617	1	no
2310043L19Rik	chr1:179571672-179573074	GF_Ileum	CV_Ileum	0	0.0857885	1.79769e+308	1.79769e+308	0.10159	1	no
Adss	chr1:179659944-179726640	GF_Ileum	CV_Ileum	56.7638	55.5432	-0.0313624	0.0581571	0.953624	0.999999	no
Hnrnpu	chr1:180248484-180268012	GF_Ileum	CV_Ileum	65.0858	58.9741	-0.14226	0.242472	0.808414	0.999999	no
Smyd3	chr1:180885169-181448150	GF_Ileum	CV_Ileum	3.07543	2.34253	-0.392723	0.42452	0.671186	0.999999	no
Tfb2m	chr1:181458186-181557617	GF_Ileum	CV_Ileum	8.9449	9.02892	0.013487	-0.0104058	0.991698	0.999999	no
Ahctf1	chr1:181675034-181734146	GF_Ileum	CV_Ileum	5.7106	5.86921	0.0395219	-0.0910265	0.927472	0.999999	no
Adck3	chr1:181890118-182126151	GF_Ileum	CV_Ileum	11.1774	7.10146	-0.654394	1.01506	0.310078	0.805773	no
Psen2	chr1:182154429-182186431	GF_Ileum	CV_Ileum	11.1331	8.34128	-0.41651	0.645037	0.518904	0.961756	no
Gm5069	chr1:182257099-182354925	GF_Ileum	CV_Ileum	1.41358	0.52029	-1.44197	1.73583	0.0825935	0.398051	no
6330403A02Rik	chr1:182362503-182413635	GF_Ileum	CV_Ileum	0.00188087	0.00169194	-0.152716	0.043877	0.965002	1	no
Mixl1	chr1:182623178-182627165	GF_Ileum	CV_Ileum	0.00569561	0	-1.79769e+308	-1.79769e+308	0.288813	1	no
-	chr1:182692765-182698729	GF_Ileum	CV_Ileum	0.23285	0.282382	0.278246	-0.281377	0.778422	0.999999	no
H3f3a	chr1:182732698-182743734	GF_Ileum	CV_Ileum	268.895	385.129	0.518298	-1.12848	0.259119	0.744004	no
Lefty1	chr1:182850928-182868532	GF_Ileum	CV_Ileum	0.17023	0.116881	-0.542444	0.26582	0.790378	1	no
Ephx1	chr1:182919683-182947651	GF_Ileum	CV_Ileum	3.21649	2.52492	-0.349251	0.524582	0.599874	0.996041	no
Nvl	chr1:183020857-183076190	GF_Ileum	CV_Ileum	6.48215	7.09156	0.129632	-0.228799	0.819025	0.999999	no
Cnih4	chr1:183076373-183142346	GF_Ileum	CV_Ileum	0.257084	0.307315	0.257477	-0.0430889	0.965631	0.999999	no
Wdr26	chr1:183076373-183142346	GF_Ileum	CV_Ileum	15.9083	19.3465	0.282298	-0.455193	0.648971	0.999999	no
Ccdc121	chr1:183439763-183441582	GF_Ileum	CV_Ileum	0	0	0	0	1	1	no
Lbr	chr1:183743609-183772532	GF_Ileum	CV_Ileum	18.8475	16.0136	-0.235069	0.527568	0.597799	0.99538	no
Enah	chr1:183834575-183950111	GF_Ileum	CV_Ileum	0	0.00265384	1.79769e+308	1.79769e+308	0.404358	1	no
Vmn1r1	chr1:184087308-184088229	GF_Ileum	CV_Ileum	0	0	0	0	1	1	no
Degs1	chr1:184205900-184212890	GF_Ileum	CV_Ileum	5.88239	5.18365	-0.182435	0.36395	0.715895	0.999999	no
Fbxo28	chr1:184243232-184271737	GF_Ileum	CV_Ileum	5.88611	5.74464	-0.0350985	0.0738993	0.941091	0.999999	no
Capn2	chr1:184397384-184447614	GF_Ileum	CV_Ileum	2.31474	2.33778	0.0142886	-0.0245306	0.980429	0.999999	no
4922505E12Rik	chr1:184677256-184679311	GF_Ileum	CV_Ileum	0	0	0	0	1	1	no
1700056E22Rik	chr1:185856910-185857877	GF_Ileum	CV_Ileum	0.352031	0.25352	-0.473604	0.480659	0.630759	1	no
1700112H15Rik	chr1:186351719-186381570	GF_Ileum	CV_Ileum	0	0	0	0	1	1	no
Hlx	chr1:186551023-186556372	GF_Ileum	CV_Ileum	0	0.00552701	1.79769e+308	1.79769e+308	0.267392	1	no
Mosc1	chr1:186610645-186635192	GF_Ileum	CV_Ileum	0.0209281	0.121353	2.53569	-1.56249	0.118172	1	no
Mosc2	chr1:186636946-186669778	GF_Ileum	CV_Ileum	128.1	103.546	-0.307004	0.63159	0.527655	0.966609	no
Mir1981	chr1:186636946-186669778	GF_Ileum	CV_Ileum	212.861	128.619	-0.726807	0.0183769	0.985338	0.999999	no
C130074G19Rik	chr1:186695804-186706915	GF_Ileum	CV_Ileum	66.7435	58.305	-0.195008	0.423373	0.672023	0.999999	no
Mark1	chr1:186720302-186823428	GF_Ileum	CV_Ileum	0.0223939	0.00892625	-1.32698	0.603953	0.545875	1	no
Iars2	chr1:187027994-187153280	GF_Ileum	CV_Ileum	24.7605	21.1188	-0.229512	0.393066	0.694271	0.999999	no
9630028B13Rik	chr1:187253235-187292650	GF_Ileum	CV_Ileum	0.0846935	0.166449	0.974756	-0.223278	0.823319	1	no
Gm2061	chr1:187253235-187292650	GF_Ileum	CV_Ileum	2.08079	2.83183	0.444608	-0.30689	0.758927	0.999999	no
-	chr1:187362413-187365317	GF_Ileum	CV_Ileum	0.143836	0.219875	0.612262	-0.397784	0.690789	1	no
Lyplal1	chr1:187911610-187941189	GF_Ileum	CV_Ileum	2.25537	2.27631	0.0133321	-0.0211678	0.983112	0.999999	no
Tgfb2	chr1:188447064-188529871	GF_Ileum	CV_Ileum	0.0205996	0.019707	-0.063903	0.0442067	0.96474	1	no
Rrp15	chr1:188544964-188573237	GF_Ileum	CV_Ileum	3.68068	3.38348	-0.121467	0.210115	0.833578	0.999999	no
-	chr1:188859795-188861667	GF_Ileum	CV_Ileum	0.0295084	0.0699689	1.24559	-0.558456	0.576533	1	no
Spata17	chr1:188868356-189175573	GF_Ileum	CV_Ileum	0.126251	0.190229	0.591443	-0.0701186	0.944099	1	no
9330162B11Rik	chr1:189432934-190038763	GF_Ileum	CV_Ileum	0	0	0	0	1	1	no
Kctd3	chr1:190794971-190831749	GF_Ileum	CV_Ileum	12.3126	10.6677	-0.206887	0.415803	0.677554	0.999999	no
Kcnk2	chr1:191031808-191168071	GF_Ileum	CV_Ileum	0.0180147	0.0216645	0.266157	-0.141636	0.887368	1	no
Cenpf	chr1:191464334-191511965	GF_Ileum	CV_Ileum	1.68568	1.83586	0.123127	-0.24628	0.805465	0.999999	no
Smyd2	chr1:191704370-191746250	GF_Ileum	CV_Ileum	15.8547	10.2537	-0.628771	1.17425	0.240293	0.718204	no
Prox1	chr1:191941920-191994593	GF_Ileum	CV_Ileum	0.885218	0.807177	-0.133148	0.201002	0.840697	0.999999	no
Rps6kc1	chr1:192596726-192735677	GF_Ileum	CV_Ileum	9.54637	8.54169	-0.16043	0.345352	0.72983	0.999999	no
Vash2	chr1:192771524-192803175	GF_Ileum	CV_Ileum	0.0921801	0.0658508	-0.485255	0.484465	0.628056	1	no
Mfsd7b	chr1:192829710-192853660	GF_Ileum	CV_Ileum	19.8188	21.8272	0.139257	-0.287799	0.773501	0.999999	no
Tatdn3	chr1:192867435-192886811	GF_Ileum	CV_Ileum	4.35222	3.95708	-0.137314	0.137513	0.890626	0.999999	no
Fam71a	chr1:192986462-192988696	GF_Ileum	CV_Ileum	0	0.00428702	1.79769e+308	1.79769e+308	0.287998	1	no
Atf3	chr1:192994175-193007212	GF_Ileum	CV_Ileum	10.6973	8.88146	-0.268382	0.428738	0.668114	0.999999	no
Nenf	chr1:193130675-193141997	GF_Ileum	CV_Ileum	6.86456	6.44498	-0.0909927	0.155722	0.876252	0.999999	no
Ppp2r5a	chr1:193149843-193220920	GF_Ileum	CV_Ileum	32.5796	35.4988	0.123802	-0.271557	0.785963	0.999999	no
-	chr1:193222041-193227094	GF_Ileum	CV_Ileum	0.242762	0.291141	0.262177	-0.330602	0.740945	0.999999	no
Dtl	chr1:193361185-193399413	GF_Ileum	CV_Ileum	2.49553	1.94589	-0.358913	0.635741	0.524945	0.965073	no
1700034H15Rik	chr1:193717950-193737126	GF_Ileum	CV_Ileum	0.30319	0.336908	0.152136	-0.0224661	0.982076	0.999999	no
Traf5	chr1:193821087-193916445	GF_Ileum	CV_Ileum	0.528418	0.413773	-0.35284	0.46663	0.640765	0.999999	no
Mir3473c	chr1:193821087-193916445	GF_Ileum	CV_Ileum	0	0	0	0	1	1	no
Rcor3	chr1:193922435-193975951	GF_Ileum	CV_Ileum	9.07327	9.49788	0.0659831	-0.100692	0.919795	0.999999	no
Hhat	chr1:194336709-194597413	GF_Ileum	CV_Ileum	0.665366	0.466571	-0.512051	0.683578	0.494242	0.949763	no
Sertad4	chr1:194670681-194681946	GF_Ileum	CV_Ileum	0.107145	0.121492	0.181289	-0.174927	0.861137	1	no
Syt14	chr1:194723500-194861892	GF_Ileum	CV_Ileum	0	0.0778134	1.79769e+308	1.79769e+308	0.0273813	1	no
Diexf	chr1:194930596-194956445	GF_Ileum	CV_Ileum	2.24564	1.64972	-0.444903	0.606908	0.543912	0.973479	no
Traf3ip3	chr1:194999662-195027740	GF_Ileum	CV_Ileum	0.0445194	0.414346	3.21833	-0.662508	0.507645	0.956226	no
Hsd11b1	chr1:195047834-195090239	GF_Ileum	CV_Ileum	0.0206222	0.0697511	1.75801	-0.511713	0.608852	1	no
G0s2	chr1:195098353-195099382	GF_Ileum	CV_Ileum	0.0182055	0.123014	2.75638	-1.00777	0.313563	1	no
Camk1g	chr1:195172539-195196476	GF_Ileum	CV_Ileum	0.0452485	0.0630738	0.47917	-0.360003	0.718845	1	no
Mir205	chr1:195333656-195333724	GF_Ileum	CV_Ileum	0	0	0	0	1	1	no
4930503O07Rik	chr1:196038380-196048953	GF_Ileum	CV_Ileum	0	0	0	0	1	1	no
Gm16897	chr1:196765014-196803153	GF_Ileum	CV_Ileum	0.0155903	0.06635	2.08945	-0.751991	0.452056	1	no
Cd46	chr1:196843342-196918449	GF_Ileum	CV_Ileum	0.459705	0.456091	-0.0113857	0.00283608	0.997737	0.999999	no
Cr1l	chr1:196922369-196957829	GF_Ileum	CV_Ileum	35.5332	37.8674	0.091785	-0.176073	0.860237	0.999999	no
Cr2	chr1:196963004-197002909	GF_Ileum	CV_Ileum	0.00995088	0.0306948	1.6251	-0.982502	0.325853	1	no
-	chr1:3190179-3190683	GF_Ileum	CV_Ileum	0.0375272	0	-1.79769e+308	-1.79769e+308	0.288813	1	no
-	chr1:4839301-4841634	GF_Ileum	CV_Ileum	0.350119	0.419674	0.261423	-0.337424	0.735797	0.999999	no
-	chr1:4843916-4845604	GF_Ileum	CV_Ileum	0.176086	0.1934	0.135305	-0.13696	0.891063	1	no
-	chr1:5252922-5253375	GF_Ileum	CV_Ileum	2.24756	0.212811	-3.40071	2.66706	0.00765191	0.0755132	no
-	chr1:6185258-6186324	GF_Ileum	CV_Ileum	0.0746077	0.042089	-0.82588	0.459447	0.645913	1	no
-	chr1:7506310-7507421	GF_Ileum	CV_Ileum	0.122784	0.164401	0.421096	-0.324248	0.74575	1	no
-	chr1:13609267-13610370	GF_Ileum	CV_Ileum	0.299408	0.38484	0.362146	-0.370421	0.711069	0.999999	no
-	chr1:16530955-16531650	GF_Ileum	CV_Ileum	0	0.174084	1.79769e+308	1.79769e+308	0.0406848	1	no
-	chr1:31054706-31055309	GF_Ileum	CV_Ileum	0	0.215473	1.79769e+308	1.79769e+308	0.06618	1	no
-	chr1:34515400-34516502	GF_Ileum	CV_Ileum	0.091203	0.0642905	-0.504477	0.32091	0.748279	1	no
-	chr1:37033467-37035211	GF_Ileum	CV_Ileum	0.0384313	0.0112914	-1.76706	0.747208	0.454938	1	no
-	chr1:37035527-37035932	GF_Ileum	CV_Ileum	0	0	0	0	1	1	no
-	chr1:37083060-37083431	GF_Ileum	CV_Ileum	0.0640899	0	-1.79769e+308	-1.79769e+308	0.288813	1	no
-	chr1:37084554-37087124	GF_Ileum	CV_Ileum	0.0506523	0.0264234	-0.938809	0.651812	0.514523	1	no
-	chr1:37243380-37243893	GF_Ileum	CV_Ileum	0.0364995	0	-1.79769e+308	-1.79769e+308	0.288813	1	no
-	chr1:39655508-39656641	GF_Ileum	CV_Ileum	0.391051	0.282915	-0.466986	0.491561	0.62303	0.999999	no
-	chr1:39659343-39660306	GF_Ileum	CV_Ileum	0.192084	0.0814158	-1.23836	0.875864	0.381104	1	no
-	chr1:42548324-42549195	GF_Ileum	CV_Ileum	0.0430398	0.078296	0.863266	-0.404888	0.68556	1	no
-	chr1:42549277-42549614	GF_Ileum	CV_Ileum	0	0.237622	1.79769e+308	1.79769e+308	0.136641	1	no
-	chr1:42550686-42551349	GF_Ileum	CV_Ileum	0	0.0608314	1.79769e+308	1.79769e+308	0.157356	1	no
-	chr1:45914541-45914683	GF_Ileum	CV_Ileum	87.7889	123.928	0.497395	-0.567859	0.570131	0.985377	no
-	chr1:52825327-52825654	GF_Ileum	CV_Ileum	0.0832656	0	-1.79769e+308	-1.79769e+308	0.288813	1	no
-	chr1:52826858-52827658	GF_Ileum	CV_Ileum	0.136344	0.214578	0.65425	-0.420211	0.674331	1	no
-	chr1:53805686-53805823	GF_Ileum	CV_Ileum	3.44659	6.24757	0.858125	-0.269585	0.78748	0.999999	no
-	chr1:54614788-54615750	GF_Ileum	CV_Ileum	0.176912	0.0548028	-1.69071	1.06889	0.285118	1	no
-	chr1:54619763-54621478	GF_Ileum	CV_Ileum	0.0589147	0.0677887	0.202417	-0.144655	0.884983	1	no
-	chr1:55108186-55109295	GF_Ileum	CV_Ileum	0.181531	0.0951277	-0.932278	0.678036	0.497749	1	no
-	chr1:55188088-55292388	GF_Ileum	CV_Ileum	0.440772	0.37999	-0.214069	0.0572271	0.954364	0.999999	no
-	chr1:55307011-55307722	GF_Ileum	CV_Ileum	0.0227712	0.23726	3.38119	-1.25556	0.209276	1	no
-	chr1:55943947-55979550	GF_Ileum	CV_Ileum	0	0	0	0	1	1	no
-	chr1:55990650-55993297	GF_Ileum	CV_Ileum	0	0.0111469	1.79769e+308	1.79769e+308	0.16148	1	no
-	chr1:55993416-55995624	GF_Ileum	CV_Ileum	0	0	0	0	1	1	no
-	chr1:56017340-56018755	GF_Ileum	CV_Ileum	0.0244635	0	-1.79769e+308	-1.79769e+308	0.218314	1	no
-	chr1:56029722-56030504	GF_Ileum	CV_Ileum	0	0	0	0	1	1	no
-	chr1:56066621-56068409	GF_Ileum	CV_Ileum	0	0	0	0	1	1	no
-	chr1:57039031-57039852	GF_Ileum	CV_Ileum	0.0565047	0.045373	-0.316536	0.139045	0.889414	1	no
-	chr1:57040623-57043032	GF_Ileum	CV_Ileum	0.035229	0.055815	0.663891	-0.467164	0.640382	1	no
-	chr1:59774374-59775763	GF_Ileum	CV_Ileum	0.144389	0.253187	0.810247	-0.71776	0.472905	1	no
-	chr1:59819121-59820179	GF_Ileum	CV_Ileum	0.164684	0.141895	-0.214881	0.158053	0.874415	1	no
-	chr1:60126935-60128119	GF_Ileum	CV_Ileum	0.335559	0.16945	-0.985704	0.977192	0.328474	1	no
-	chr1:60130008-60131280	GF_Ileum	CV_Ileum	0.25926	0.155301	-0.739326	0.692733	0.488477	1	no
-	chr1:63174948-63176285	GF_Ileum	CV_Ileum	0.390219	0.32448	-0.266153	0.292507	0.769899	0.999999	no
-	chr1:64577113-64578717	GF_Ileum	CV_Ileum	0.216449	0.140089	-0.627688	0.622683	0.533493	1	no
-	chr1:64665440-64666321	GF_Ileum	CV_Ileum	0.051636	0.128259	1.31261	-0.673294	0.50076	1	no
-	chr1:66995085-66995239	GF_Ileum	CV_Ileum	37.5578	1.18989	-4.98022	1.82319	0.0682748	0.353206	no
-	chr1:74798876-74831893	GF_Ileum	CV_Ileum	0.197342	0.227672	0.206262	-0.105909	0.915655	1	no
-	chr1:78304067-78304734	GF_Ileum	CV_Ileum	0.145126	0.191443	0.39961	-0.258687	0.795877	1	no
-	chr1:78556146-78557083	GF_Ileum	CV_Ileum	0.0159309	0.0292372	0.875981	-0.285513	0.775251	1	no
-	chr1:78578748-78579203	GF_Ileum	CV_Ileum	0.0443152	0.0747111	0.753522	-0.241097	0.80948	1	no
-	chr1:78591519-78593479	GF_Ileum	CV_Ileum	0.0270044	0.0496057	0.877314	-0.481031	0.630495	1	no
-	chr1:79597864-79599265	GF_Ileum	CV_Ileum	0.0197074	0.0668306	1.76177	-0.807157	0.419576	1	no
-	chr1:81793887-81793972	GF_Ileum	CV_Ileum	0	0	0	0	1	1	no
-	chr1:82905203-82910798	GF_Ileum	CV_Ileum	0.563109	0.769026	0.449618	-0.741987	0.458095	0.931215	no
-	chr1:87667266-87669750	GF_Ileum	CV_Ileum	0.305192	0.355689	0.220898	-0.283126	0.77708	0.999999	no
-	chr1:87669849-87671691	GF_Ileum	CV_Ileum	0.0943927	0.297711	1.65717	-1.49684	0.134434	0.530306	no
-	chr1:87671963-87673473	GF_Ileum	CV_Ileum	0.172652	0.189989	0.138047	-0.125002	0.900522	1	no
-	chr1:87673619-87674952	GF_Ileum	CV_Ileum	0.114936	0.262951	1.19397	-1.02158	0.306978	1	no
-	chr1:87935981-87937223	GF_Ileum	CV_Ileum	0.0340064	0.117687	1.79108	-0.938093	0.348196	1	no
-	chr1:88177465-88203880	GF_Ileum	CV_Ileum	0	0	0	0	1	1	no
-	chr1:88177465-88203880	GF_Ileum	CV_Ileum	0	0	0	0	1	1	no
-	chr1:88207383-88208738	GF_Ileum	CV_Ileum	0	0.00715248	1.79769e+308	1.79769e+308	0.293259	1	no
-	chr1:88208831-88209766	GF_Ileum	CV_Ileum	0.0319466	0	-1.79769e+308	-1.79769e+308	0.236268	1	no
-	chr1:88369123-88369511	GF_Ileum	CV_Ileum	0	0	0	0	1	1	no
-	chr1:88384412-88384821	GF_Ileum	CV_Ileum	0.416214	0.175272	-1.24773	0.719792	0.471653	0.93926	no
-	chr1:88400212-88400982	GF_Ileum	CV_Ileum	0.0614278	0.0457734	-0.424384	0.18362	0.854311	1	no
-	chr1:88967887-88968969	GF_Ileum	CV_Ileum	0.273021	0.343136	0.329772	-0.329091	0.742087	0.999999	no
-	chr1:89504321-89617083	GF_Ileum	CV_Ileum	0.0920077	0.0485365	-0.922684	0.172442	0.86309	1	no
-	chr1:90887372-90888565	GF_Ileum	CV_Ileum	0.112879	0.316791	1.48876	-1.21176	0.225605	0.697457	no
-	chr1:94830119-94886078	GF_Ileum	CV_Ileum	0.373482	0.333643	0	0	1	1	no
-	chr1:94886426-94887138	GF_Ileum	CV_Ileum	0.022728	0.0169792	-0.4207	0.115067	0.908392	1	no
-	chr1:95268708-95270060	GF_Ileum	CV_Ileum	1.49066	1.10721	-0.42903	0.650298	0.5155	0.960153	no
-	chr1:95757015-95757558	GF_Ileum	CV_Ileum	0.955566	1.44856	0.600191	-0.662651	0.507554	0.956215	no
-	chr1:95797582-95798787	GF_Ileum	CV_Ileum	0.587056	0.619256	0.0770382	-0.0907317	0.927706	0.999999	no
-	chr1:95798990-95800535	GF_Ileum	CV_Ileum	1.6642	1.00403	-0.729022	1.07497	0.28239	0.773794	no
-	chr1:99992673-99993617	GF_Ileum	CV_Ileum	0.211061	0.124172	-0.76532	0.557006	0.577523	1	no
-	chr1:100084302-100085180	GF_Ileum	CV_Ileum	0.034573	0.128871	1.89821	-0.870976	0.383767	1	no
-	chr1:106665395-106910309	GF_Ileum	CV_Ileum	1.58918	2.78448	0.809123	-0.127257	0.898737	0.999999	no
-	chr1:106923816-106924646	GF_Ileum	CV_Ileum	0.890235	1.98378	1.15599	-1.47084	0.141335	0.545202	no
-	chr1:106924841-107054452	GF_Ileum	CV_Ileum	0.257371	0.522133	1.02057	-0.3111	0.755725	0.999999	no
-	chr1:106924841-107054452	GF_Ileum	CV_Ileum	0.313521	2.15583	2.7816	-0.340252	0.733667	0.999999	no
-	chr1:106924841-107054452	GF_Ileum	CV_Ileum	0.396589	0.908816	1.19634	-0.572162	0.567212	0.98415	no
-	chr1:106924841-107054452	GF_Ileum	CV_Ileum	0.617857	0.58341	-0.082763	0.0269508	0.978499	0.999999	no
-	chr1:106924841-107054452	GF_Ileum	CV_Ileum	1.12811	1.355	0.264378	-0.0849206	0.932325	0.999999	no
-	chr1:106924841-107054452	GF_Ileum	CV_Ileum	0.605551	0.475936	-0.347481	0.0708829	0.943491	0.999999	no
-	chr1:106924841-107054452	GF_Ileum	CV_Ileum	0.568142	1.42936	1.33104	-0.692046	0.488909	0.947543	no
-	chr1:106924841-107054452	GF_Ileum	CV_Ileum	1.05067	1.77507	0.756566	-0.787242	0.43114	0.913396	no
-	chr1:106924841-107054452	GF_Ileum	CV_Ileum	0.355073	0.889939	1.32559	-0.216225	0.828812	0.999999	no
-	chr1:106924841-107054452	GF_Ileum	CV_Ileum	0.228941	0.568214	1.31146	-0.2107	0.833121	0.999999	no
-	chr1:106924841-107054452	GF_Ileum	CV_Ileum	0.48119	0.931959	0.95366	-0.423059	0.672253	0.999999	no
-	chr1:106924841-107054452	GF_Ileum	CV_Ileum	0.321757	1.13934	1.82415	-0.555699	0.578417	0.988481	no
-	chr1:107119199-107120064	GF_Ileum	CV_Ileum	0.0704672	0.117601	0.738874	-0.403104	0.686872	1	no
-	chr1:107120187-107120756	GF_Ileum	CV_Ileum	0.0311838	0.140521	2.17192	-0.774398	0.438695	1	no
-	chr1:107141123-107141746	GF_Ileum	CV_Ileum	0.240765	0.393869	0.710089	-0.549061	0.582964	0.990071	no
-	chr1:107876084-107930954	GF_Ileum	CV_Ileum	0.0945243	0.0143447	-2.72017	0.201514	0.840296	1	no
-	chr1:107876084-107930954	GF_Ileum	CV_Ileum	0.0653811	0.156988	1.26371	-0.334403	0.738075	1	no
-	chr1:110461920-110464486	GF_Ileum	CV_Ileum	0.619592	1.42899	1.2056	-1.82427	0.0681111	0.352725	no
-	chr1:110467240-110470201	GF_Ileum	CV_Ileum	0.0847627	0.226463	1.41777	-1.44784	0.147661	1	no
-	chr1:120284471-120285462	GF_Ileum	CV_Ileum	0.46659	0.575128	0.301729	-0.335962	0.7369	0.999999	no
-	chr1:123237454-123238826	GF_Ileum	CV_Ileum	0.0100944	0.0813937	3.01136	-1.09727	0.272525	1	no
-	chr1:123239871-123242827	GF_Ileum	CV_Ileum	0.052675	0.220216	2.06373	-1.75747	0.0788374	1	no
-	chr1:123324247-123325028	GF_Ileum	CV_Ileum	0.089367	0.0911749	0.0288941	-0.0168034	0.986593	1	no
-	chr1:127350544-127353145	GF_Ileum	CV_Ileum	0.0679781	0.104172	0.615818	-0.515859	0.605953	1	no
-	chr1:127354272-127355392	GF_Ileum	CV_Ileum	0	0.0401051	1.79769e+308	1.79769e+308	0.124978	1	no
-	chr1:127357368-127358125	GF_Ileum	CV_Ileum	0	0.0304536	1.79769e+308	1.79769e+308	0.217664	1	no
-	chr1:127358894-127360008	GF_Ileum	CV_Ileum	0	0.0303514	1.79769e+308	1.79769e+308	0.159401	1	no
-	chr1:132721611-132722456	GF_Ileum	CV_Ileum	0.062786	0.0539574	-0.218622	0.109679	0.912664	1	no
-	chr1:132752584-132753183	GF_Ileum	CV_Ileum	0.0578525	0.0207252	-1.481	0.445135	0.656222	1	no
-	chr1:132943864-132944810	GF_Ileum	CV_Ileum	0.234479	0.168149	-0.479718	0.400087	0.689092	1	no
-	chr1:132945243-132946411	GF_Ileum	CV_Ileum	0.231349	0.132165	-0.807725	0.733314	0.463367	1	no
-	chr1:133719019-133720754	GF_Ileum	CV_Ileum	0.163065	0.204657	0.327762	-0.330676	0.740889	1	no
-	chr1:134859710-134921953	GF_Ileum	CV_Ileum	0.376671	0.609639	0	0	1	1	no
-	chr1:135024336-135027511	GF_Ileum	CV_Ileum	1.70705	2.04566	0.26106	-0.474772	0.634949	0.999999	no
-	chr1:135039861-135040547	GF_Ileum	CV_Ileum	0.262973	0.0850618	-1.62833	0.972289	0.330907	1	no
-	chr1:135060302-135200032	GF_Ileum	CV_Ileum	0.125203	0.0271254	-2.20655	0.0489556	0.960955	1	no
-	chr1:135060302-135200032	GF_Ileum	CV_Ileum	0.44519	0.170291	-1.38642	0.0376308	0.969982	0.999999	no
-	chr1:135060302-135200032	GF_Ileum	CV_Ileum	0	0.0467111	1.79769e+308	1.79769e+308	0.472839	1	no
-	chr1:135060302-135200032	GF_Ileum	CV_Ileum	0	0.0444819	1.79769e+308	1.79769e+308	0.474151	1	no
-	chr1:135206025-135226299	GF_Ileum	CV_Ileum	1.15192	1.28512	0.157866	-0.044874	0.964208	0.999999	no
-	chr1:135864563-135865356	GF_Ileum	CV_Ileum	0.175304	0.115886	-0.597146	0.41026	0.681615	1	no
-	chr1:137082827-137083746	GF_Ileum	CV_Ileum	0	0.0991091	1.79769e+308	1.79769e+308	0.0621247	1	no
-	chr1:137140660-137141262	GF_Ileum	CV_Ileum	0.137835	0.0205705	-2.7443	0.901828	0.367148	1	no
-	chr1:137146054-137147132	GF_Ileum	CV_Ileum	0.0333915	0	-1.79769e+308	-1.79769e+308	0.218314	1	no
-	chr1:137503734-137504474	GF_Ileum	CV_Ileum	0.0215821	0.0812019	1.91168	-0.674233	0.500163	1	no
-	chr1:137684094-137684716	GF_Ileum	CV_Ileum	0	0.0205823	1.79769e+308	1.79769e+308	0.287998	1	no
-	chr1:137685234-137685806	GF_Ileum	CV_Ileum	0	0.029014	1.79769e+308	1.79769e+308	0.267392	1	no
-	chr1:137688136-137691803	GF_Ileum	CV_Ileum	0.0244403	0.0257976	0.0779719	-0.0535679	0.957279	1	no
-	chr1:137691912-137693032	GF_Ileum	CV_Ileum	0	0.0368943	1.79769e+308	1.79769e+308	0.134962	1	no
-	chr1:138022987-138024360	GF_Ileum	CV_Ileum	0.19197	0.192058	0.000662238	-0.000623484	0.999503	1	no
-	chr1:138077956-138105579	GF_Ileum	CV_Ileum	0.258279	0.372802	0.529479	-0.180791	0.856531	0.999999	no
-	chr1:139117666-139118878	GF_Ileum	CV_Ileum	0.134139	0.226984	0.758863	-0.623348	0.533056	1	no
-	chr1:139119084-139121264	GF_Ileum	CV_Ileum	0.226687	0.180965	-0.324991	0.371006	0.710633	1	no
-	chr1:139121874-139122649	GF_Ileum	CV_Ileum	0.09025	0.168378	0.899702	-0.567118	0.570634	1	no
-	chr1:141078059-141079021	GF_Ileum	CV_Ileum	0.10793	0.126651	0.230768	-0.146861	0.883242	1	no
-	chr1:143511194-143511665	GF_Ileum	CV_Ileum	0.310641	0.0321871	-3.2707	1.15401	0.248496	1	no
-	chr1:144990978-144991102	GF_Ileum	CV_Ileum	0	0	0	0	1	1	no
-	chr1:153087313-153094117	GF_Ileum	CV_Ileum	0.281713	0.537503	0.932045	-1.48126	0.138537	0.539379	no
-	chr1:153094335-153094891	GF_Ileum	CV_Ileum	0.0322752	0.254481	2.97906	-1.0929	0.274437	1	no
-	chr1:153094941-153095463	GF_Ileum	CV_Ileum	0.071053	0.266251	1.90582	-0.876996	0.380489	1	no
-	chr1:153570027-153570762	GF_Ileum	CV_Ileum	0	0	0	0	1	1	no
-	chr1:155744298-155745332	GF_Ileum	CV_Ileum	0.154345	0.119605	-0.367885	0.272154	0.785504	1	no
-	chr1:155764464-155765103	GF_Ileum	CV_Ileum	0	0.0188357	1.79769e+308	1.79769e+308	0.293259	1	no
-	chr1:157054336-157054688	GF_Ileum	CV_Ileum	0.156012	0.109273	-0.513716	0.196143	0.844499	1	no
-	chr1:157622412-157622851	GF_Ileum	CV_Ileum	0.0470928	0.0361473	-0.381617	0.104377	0.91687	1	no
-	chr1:162907450-162908461	GF_Ileum	CV_Ileum	0	0.0622265	1.79769e+308	1.79769e+308	0.0893284	1	no
-	chr1:163154163-163155767	GF_Ileum	CV_Ileum	0.0297152	0.137495	2.21011	-1.34894	0.177355	1	no
-	chr1:163160524-163161893	GF_Ileum	CV_Ileum	0.01012	0.0594507	2.55449	-0.929226	0.352772	1	no
-	chr1:164538210-164538657	GF_Ileum	CV_Ileum	0.15075	0.0667913	-1.17443	0.486506	0.626609	1	no
-	chr1:164539126-164540457	GF_Ileum	CV_Ileum	0.0836433	0.248368	1.57016	-1.10457	0.269347	1	no
-	chr1:164802070-164802660	GF_Ileum	CV_Ileum	0.0887054	0.369232	2.05743	-1.08157	0.279443	0.770009	no
-	chr1:166393067-166393650	GF_Ileum	CV_Ileum	0.763632	1.42663	0.901661	-0.913718	0.360865	0.857554	no
-	chr1:166441940-166444964	GF_Ileum	CV_Ileum	0.036458	0.0183674	-0.989086	0.614808	0.538682	1	no
-	chr1:166499102-166501830	GF_Ileum	CV_Ileum	0.0526388	0.0429018	-0.295088	0.221198	0.824938	1	no
-	chr1:166501980-166504922	GF_Ileum	CV_Ileum	0.0284481	0.0559912	0.976867	-0.699047	0.484522	1	no
-	chr1:166505142-166510195	GF_Ileum	CV_Ileum	0.0123097	0.0388179	1.65693	-1.00067	0.316985	1	no
-	chr1:166635191-166642685	GF_Ileum	CV_Ileum	0.17731	0.214281	0.273229	-0.110608	0.911927	1	no
-	chr1:166803786-166808362	GF_Ileum	CV_Ileum	0.189214	0.338576	0.839461	-1.1546	0.248256	0.72983	no
-	chr1:166808545-166811369	GF_Ileum	CV_Ileum	0.149364	0.277769	0.895047	-1.0168	0.309249	1	no
-	chr1:169237714-169238139	GF_Ileum	CV_Ileum	0.212939	0.257216	0.272536	-0.161088	0.872024	1	no
-	chr1:169617902-169618657	GF_Ileum	CV_Ileum	0.361656	0.109035	-1.72983	1.28675	0.198181	1	no
-	chr1:172221624-172222553	GF_Ileum	CV_Ileum	0.0644083	0.230969	1.84238	-1.0545	0.291653	1	no
-	chr1:173250741-173254749	GF_Ileum	CV_Ileum	0.172327	0.203994	0.243379	-0.314285	0.753304	1	no
-	chr1:173257436-173258368	GF_Ileum	CV_Ileum	0.0962247	0.165713	0.784209	-0.493643	0.621558	1	no
-	chr1:179357890-179358244	GF_Ileum	CV_Ileum	0.140773	0.110611	-0.347876	0.128221	0.897974	1	no
-	chr1:179358304-179360478	GF_Ileum	CV_Ileum	0.27317	0.279315	0.0320931	-0.0393283	0.968629	0.999999	no
-	chr1:179390083-179391329	GF_Ileum	CV_Ileum	0.231501	0.394706	0.769757	-0.738282	0.460343	0.932733	no
-	chr1:179450642-179451444	GF_Ileum	CV_Ileum	0.172816	0.257793	0.576976	-0.446164	0.655479	1	no
-	chr1:180415749-180417834	GF_Ileum	CV_Ileum	0.116882	0.287467	1.29835	-1.2354	0.216683	0.683452	no
-	chr1:180417944-180419991	GF_Ileum	CV_Ileum	0.155264	0.243762	0.650746	-0.685929	0.492758	1	no
-	chr1:181795360-181796664	GF_Ileum	CV_Ileum	0.026826	0.00975276	-1.45975	0.490921	0.623482	1	no
-	chr1:182232619-182233222	GF_Ileum	CV_Ileum	0.480838	0.592798	0.301991	-0.280411	0.779162	0.999999	no
-	chr1:182850928-182868532	GF_Ileum	CV_Ileum	0.016507	0.0462772	1.48722	-0.44273	0.657961	1	no
-	chr1:182850928-182868532	GF_Ileum	CV_Ileum	0.0264964	0.0445661	0.750149	-0.100148	0.920227	1	no
-	chr1:182850928-182868532	GF_Ileum	CV_Ileum	0.0367331	0.0594715	0.695116	-0.150111	0.880677	1	no
-	chr1:183017271-183020511	GF_Ileum	CV_Ileum	0.831972	0.930618	0.161654	-0.264564	0.791345	0.999999	no
-	chr1:183076373-183142346	GF_Ileum	CV_Ileum	0.2351	0.577097	1.29554	-0.127871	0.898251	0.999999	no
-	chr1:183157533-183158346	GF_Ileum	CV_Ileum	0.0953735	0.0587411	-0.699219	0.35502	0.722574	1	no
-	chr1:183215691-183230962	GF_Ileum	CV_Ileum	3.83448	4.68228	0.288178	-0.344144	0.730738	0.999999	no
-	chr1:183236097-183237106	GF_Ileum	CV_Ileum	0.217508	0.369906	0.766089	-0.705042	0.480784	0.94406	no
-	chr1:184908673-184910768	GF_Ileum	CV_Ileum	0.440802	0.252238	-0.805342	1.0158	0.309724	0.805565	no
-	chr1:186675736-186676578	GF_Ileum	CV_Ileum	0.33497	0.125725	-1.41375	1.16016	0.245982	1	no
-	chr1:186677549-186678254	GF_Ileum	CV_Ileum	0.125024	0.194259	0.635778	-0.424782	0.670996	1	no
-	chr1:186691681-186693288	GF_Ileum	CV_Ileum	0.080536	0.155299	0.947342	-0.749587	0.453504	1	no
-	chr1:187308817-187326776	GF_Ileum	CV_Ileum	0	0	0	0	1	1	no
-	chr1:187308817-187326776	GF_Ileum	CV_Ileum	0	0	0	0	1	1	no
-	chr1:187435381-187468887	GF_Ileum	CV_Ileum	0.0711998	0.117743	0.725695	-0.273644	0.784359	1	no
-	chr1:188573365-188574128	GF_Ileum	CV_Ileum	0.15421	0.172208	0.159258	-0.111919	0.910888	1	no
-	chr1:192824361-192825032	GF_Ileum	CV_Ileum	0.232053	0.214509	-0.113415	0.0837878	0.933225	1	no
-	chr1:193920875-193921391	GF_Ileum	CV_Ileum	0.0723386	0.344309	2.25087	-1.05234	0.292643	0.786044	no
-	chr1:194717436-194719414	GF_Ileum	CV_Ileum	0.0837396	0.162069	0.952625	-0.817145	0.413846	1	no
-	chr1:194719468-194720658	GF_Ileum	CV_Ileum	0	0.0982223	1.79769e+308	1.79769e+308	0.0339519	1	no
-	chr1:196922369-196957829	GF_Ileum	CV_Ileum	0.679728	0.899154	0.40361	-0.133234	0.894008	0.999999	no
-	chr1:197067761-197067982	GF_Ileum	CV_Ileum	2.20165	2.27223	0.0455199	-0.0346636	0.972348	0.999999	no
Cnksr3	chr10:3134303-3227479	GF_Ileum	CV_Ileum	12.8888	12.6568	-0.0262086	0.0602018	0.951995	0.999999	no
Ipcef1	chr10:3308331-3557940	GF_Ileum	CV_Ileum	0.0557017	0.143842	1.3687	-1.36168	0.173298	1	no
Rgs17	chr10:4424140-4520877	GF_Ileum	CV_Ileum	0.113108	0.0960541	-0.235777	0.259877	0.794959	1	no
Mtrf1l	chr10:4522208-4536849	GF_Ileum	CV_Ileum	2.80797	3.1289	0.156128	-0.250433	0.802253	0.999999	no
Fbxo5	chr10:4540618-4547383	GF_Ileum	CV_Ileum	4.49601	4.38775	-0.0351666	0.0571984	0.954387	0.999999	no
Syne1	chr10:4623277-5009592	GF_Ileum	CV_Ileum	0	0.00158589	1.79769e+308	1.79769e+308	0.350011	1	no
Syne1	chr10:5151762-5326342	GF_Ileum	CV_Ileum	1.01483	1.01788	0.00433074	-0.00707752	0.994353	0.999999	no
Rmnd1	chr10:5914188-5945028	GF_Ileum	CV_Ileum	6.42707	8.00483	0	0	1	1	no
Zbtb2	chr10:5958432-5979501	GF_Ileum	CV_Ileum	4.38608	4.41257	0.00868619	-0.0162389	0.987044	0.999999	no
H60c	chr10:7078435-7090333	GF_Ileum	CV_Ileum	0.0143978	0.043996	1.61153	-0.581643	0.560807	1	no
Lrp11	chr10:7309597-7345275	GF_Ileum	CV_Ileum	0.191177	0.108931	-0.8115	0.960539	0.336784	1	no
Pcmt1	chr10:7347513-7385952	GF_Ileum	CV_Ileum	1.04225	1.08253	0.0547072	-0.0551275	0.956037	0.999999	no
A630066F11Rik	chr10:7347513-7385952	GF_Ileum	CV_Ileum	0.118097	2.5943	4.4573	-0.0778311	0.937962	0.999999	no
Nup43	chr10:7387301-7398684	GF_Ileum	CV_Ileum	3.56189	2.38485	-0.578745	0.94401	0.345165	0.843316	no
Lats1	chr10:7398768-7436259	GF_Ileum	CV_Ileum	10.08	13.3305	0.403229	-0.81262	0.416436	0.903024	no
Katna1	chr10:7445797-7482948	GF_Ileum	CV_Ileum	19.7169	18.6276	-0.0819897	0.184127	0.853914	0.999999	no
-	chr10:7487744-7502497	GF_Ileum	CV_Ileum	0.0443079	0.0437617	-0.0178956	0.000262115	0.999791	1	no
Ppil4	chr10:7512691-7543223	GF_Ileum	CV_Ileum	7.66623	8.34284	0.12202	-0.24214	0.808672	0.999999	no
Zc3h12d	chr10:7552267-7590195	GF_Ileum	CV_Ileum	7.06237	5.46788	-0.369171	0.791487	0.42866	0.911535	no
Mir5104	chr10:7552267-7590195	GF_Ileum	CV_Ileum	0	0	0	0	1	1	no
-	chr10:8623760-8642894	GF_Ileum	CV_Ileum	0.0477214	0.0585476	0.294975	-0.195112	0.845305	1	no
Gm6150	chr10:9404519-9411707	GF_Ileum	CV_Ileum	0	0	0	0	1	1	no
Gm5177	chr10:10325742-10336111	GF_Ileum	CV_Ileum	1.0665	1.26773	0.249356	-0.392121	0.694969	0.999999	no
Shprh	chr10:10869227-10937371	GF_Ileum	CV_Ileum	2.087	2.44021	0.225579	-0.426087	0.670045	0.999999	no
Fbxo30	chr10:11001127-11017767	GF_Ileum	CV_Ileum	2.62277	2.69546	0.0394422	-0.0811536	0.93532	0.999999	no
Epm2a	chr10:11063166-11179316	GF_Ileum	CV_Ileum	0.328386	0.232129	-0.500468	0.655209	0.512333	1	no
Sf3b5	chr10:12728255-12728989	GF_Ileum	CV_Ileum	34.9144	27.1131	-0.364829	0.780764	0.434941	0.916247	no
Plagl1	chr10:12810593-12851501	GF_Ileum	CV_Ileum	0.350684	0.393888	0.167611	-0.221033	0.825067	0.999999	no
Fuca2	chr10:13220830-13238840	GF_Ileum	CV_Ileum	46.2627	45.6444	-0.0194117	0.0402983	0.967855	0.999999	no
Adat2	chr10:13243647-13283182	GF_Ileum	CV_Ileum	1.50676	1.41559	-0.0900455	0.0648328	0.948307	0.999999	no
Hivep2	chr10:13685856-13871184	GF_Ileum	CV_Ileum	3.98556	4.2643	0.0975238	-0.166581	0.8677	0.999999	no
Nmbr	chr10:14480094-14490362	GF_Ileum	CV_Ileum	0.0474325	0	-1.79769e+308	-1.79769e+308	0.171222	1	no
Cited2	chr10:17443033-17445480	GF_Ileum	CV_Ileum	46.4914	57.2578	0.300508	-0.700249	0.483772	0.945088	no
Txlnb	chr10:17516024-17565469	GF_Ileum	CV_Ileum	0.0102326	0.00662574	-0.627013	0.299991	0.764184	1	no
Reps1	chr10:17775352-17845020	GF_Ileum	CV_Ileum	5.93061	5.05779	-0.229673	0.413704	0.679091	0.999999	no
Nhsl1	chr10:18038430-18254773	GF_Ileum	CV_Ileum	22.3992	22.0373	-0.0235008	0.0514809	0.958942	0.999999	no
Perp	chr10:18564876-18576878	GF_Ileum	CV_Ileum	135.768	152.929	0.171724	-0.367093	0.713549	0.999999	no
Gm20139	chr10:18861554-18927753	GF_Ileum	CV_Ileum	0.040046	0.012925	-1.63149	0.982729	0.325741	1	no
Olig3	chr10:19076344-19078410	GF_Ileum	CV_Ileum	0	0.00979963	1.79769e+308	1.79769e+308	0.217664	1	no
Ifngr1	chr10:19311763-19330050	GF_Ileum	CV_Ileum	145.538	134.494	-0.113851	0.24042	0.810005	0.999999	no
Il22ra2	chr10:19341833-19354487	GF_Ileum	CV_Ileum	0.119993	0.316136	1.39759	-1.43007	0.152696	0.569684	no
Il20ra	chr10:19432392-19479859	GF_Ileum	CV_Ileum	0	0	0	0	1	1	no
Map3k5	chr10:19654331-19863027	GF_Ileum	CV_Ileum	4.87045	3.88911	-0.324616	0.535847	0.592064	0.993568	no
Mtap7	chr10:19868725-20001396	GF_Ileum	CV_Ileum	42.2246	42.9732	0.0253539	-0.0524027	0.958208	0.999999	no
Gm6251	chr10:19868725-20001396	GF_Ileum	CV_Ileum	3.23121	0.983656	-1.71585	0.313539	0.753871	0.999999	no
Bclaf1	chr10:20030345-20062788	GF_Ileum	CV_Ileum	15.0158	16.8877	0.169491	-0.325958	0.744456	0.999999	no
Fam54a	chr10:20067624-20081475	GF_Ileum	CV_Ileum	1.21193	0.987395	-0.295612	0.38941	0.696973	0.999999	no
Ahi1	chr10:20672352-20811827	GF_Ileum	CV_Ileum	0.150063	0.143893	-0.0605675	0.0207359	0.983456	1	no
Hbs1l	chr10:21015784-21088697	GF_Ileum	CV_Ileum	24.4591	23.49	0	0	1	1	no
Aldh8a1	chr10:21097105-21116384	GF_Ileum	CV_Ileum	0.0174687	0.0344921	0.981494	-0.495414	0.620308	1	no
-	chr10:21279245-21295152	GF_Ileum	CV_Ileum	1.06277	1.02503	-0.0521664	0.0346268	0.972377	0.999999	no
1700020N01Rik	chr10:21312950-21342181	GF_Ileum	CV_Ileum	0.248087	0.496949	1.00225	-0.958119	0.338003	0.836053	no
-	chr10:21820366-21822776	GF_Ileum	CV_Ileum	0	0	0	0	1	1	no
Raet1a,Raet1b,Raet1c,Raet1d,Raet1e	chr10:21824138-22094436	GF_Ileum	CV_Ileum	0.414046	0.869704	1.07073	-0.307793	0.75824	0.999999	no
H60b	chr10:21824138-22094436	GF_Ileum	CV_Ileum	0	0.00899055	1.79769e+308	1.79769e+308	0.439013	1	no
C920009B18Rik	chr10:21824138-22094436	GF_Ileum	CV_Ileum	0.0398193	0.0149743	-1.41098	0.295977	0.767248	1	no
Gm10825	chr10:22122618-22127276	GF_Ileum	CV_Ileum	0.00549458	0.0109197	0.990848	-0.431774	0.665906	1	no
Slc2a12	chr10:22364816-22451726	GF_Ileum	CV_Ileum	0.211505	0.201783	-0.0678854	0.0322035	0.97431	1	no
1110021L09Rik	chr10:23516791-23547774	GF_Ileum	CV_Ileum	21.1534	23.5549	0.155134	-0.328909	0.742224	0.999999	no
Vnn3	chr10:23571267-23589831	GF_Ileum	CV_Ileum	0.170591	0.140508	-0.279884	0.202364	0.839632	1	no
Vnn1	chr10:23614487-23626114	GF_Ileum	CV_Ileum	55.966	72.3512	0.370465	-0.817132	0.413853	0.900878	no
Taar1	chr10:23640211-23641210	GF_Ileum	CV_Ileum	0	0.0134822	1.79769e+308	1.79769e+308	0.267392	1	no
Taar2	chr10:23658377-23661389	GF_Ileum	CV_Ileum	0	0	0	0	1	1	no
Taar3	chr10:23669363-23670395	GF_Ileum	CV_Ileum	0	0	0	0	1	1	no
Taar4	chr10:23680299-23681343	GF_Ileum	CV_Ileum	0	0	0	0	1	1	no
Taar5	chr10:23690511-23691525	GF_Ileum	CV_Ileum	0.0144518	0	-1.79769e+308	-1.79769e+308	0.288813	1	no
Taar7b	chr10:23719744-23720821	GF_Ileum	CV_Ileum	0	0	0	0	1	1	no
Taar7d	chr10:23747027-23748104	GF_Ileum	CV_Ileum	0	0	0	0	1	1	no
Taar7e	chr10:23757419-23758496	GF_Ileum	CV_Ileum	0	0	0	0	1	1	no
Taar7f	chr10:23769315-23770392	GF_Ileum	CV_Ileum	0	0	0	0	1	1	no
Taar8a	chr10:23796305-23797340	GF_Ileum	CV_Ileum	0	0	0	0	1	1	no
Stx7	chr10:23869095-23910026	GF_Ileum	CV_Ileum	36.26	43.8717	0.274909	-0.58838	0.556277	0.979379	no
Moxd1	chr10:23943322-24022589	GF_Ileum	CV_Ileum	0.0817799	0.0578061	-0.500525	0.462595	0.643655	1	no
Ctgf	chr10:24315247-24318488	GF_Ileum	CV_Ileum	0.026812	0	-1.79769e+308	-1.79769e+308	0.166673	1	no
Med23	chr10:24589754-24633335	GF_Ileum	CV_Ileum	5.40378	5.1448	-0.0708552	0.14861	0.881862	0.999999	no
Epb4.1l2	chr10:25079603-25243408	GF_Ileum	CV_Ileum	10.2112	10.5459	0.0465259	-0.101228	0.919369	0.999999	no
Gm9767	chr10:25710991-25799253	GF_Ileum	CV_Ileum	0	0	0	0	1	1	no
Samd3	chr10:25949512-25991978	GF_Ileum	CV_Ileum	0	0.029703	1.79769e+308	1.79769e+308	0.103902	1	no
Arhgap18	chr10:26492317-26638454	GF_Ileum	CV_Ileum	27.5145	30.2692	0.137657	-0.305619	0.759894	0.999999	no
Ptprk	chr10:27794249-28317326	GF_Ileum	CV_Ileum	17.4829	14.8263	-0.237784	0.447779	0.654313	0.999999	no
Themis	chr10:28388200-28602555	GF_Ileum	CV_Ileum	0.00315712	0.0749008	4.5683	-1.72052	0.0853375	1	no
6330407J23Rik	chr10:28863801-28919434	GF_Ileum	CV_Ileum	0.100736	0.0191184	-2.39754	1.96802	0.0490661	1	no
9330159F19Rik	chr10:28931448-28950585	GF_Ileum	CV_Ileum	0.015371	0.0122746	-0.324535	0.19772	0.843264	1	no
Echdc1	chr10:29032827-29082531	GF_Ileum	CV_Ileum	4.63173	11.4178	1.30167	-1.73875	0.0820784	0.396558	no
Hddc2	chr10:31033210-31047994	GF_Ileum	CV_Ileum	7.51692	7.07801	-0.0867969	0.114486	0.908852	0.999999	no
Trdn	chr10:32803288-33196515	GF_Ileum	CV_Ileum	0	0	0	0	1	1	no
Sult3a1	chr10:33577527-33599281	GF_Ileum	CV_Ileum	0	0	0	0	1	1	no
Rsph4a	chr10:33624916-33635827	GF_Ileum	CV_Ileum	0.0416865	0.0231289	-0.849885	0.604019	0.545831	1	no
Bet3l	chr10:33757402-33829621	GF_Ileum	CV_Ileum	0	0	0	0	1	1	no
Tspyl1	chr10:34001995-34004691	GF_Ileum	CV_Ileum	14.9657	14.6749	-0.0283101	0.0648966	0.948256	0.999999	no
Tspyl4	chr10:34017226-34021126	GF_Ileum	CV_Ileum	0.116001	0.123324	0.0883215	-0.101311	0.919304	1	no
Col10a1	chr10:34023413-34138365	GF_Ileum	CV_Ileum	0	0.00275714	1.79769e+308	1.79769e+308	0.447377	1	no
Frk	chr10:34203205-34331344	GF_Ileum	CV_Ileum	36.3082	32.5484	-0.157707	0.308915	0.757386	0.999999	no
Hs3st5	chr10:36226612-36554200	GF_Ileum	CV_Ileum	0	0	0	0	1	1	no
Hdac2	chr10:36694349-36721694	GF_Ileum	CV_Ileum	15.621	13.1695	-0.246287	0.538557	0.590192	0.992909	no
Lama4	chr10:38685320-38829994	GF_Ileum	CV_Ileum	0.0203089	0.0143301	-0.503062	0.375002	0.707659	1	no
Tube1	chr10:38853826-38883600	GF_Ileum	CV_Ileum	1.11583	0.796195	-0.486927	0.598535	0.549483	0.976146	no
Fyn	chr10:39089604-39285180	GF_Ileum	CV_Ileum	0.93953	1.06406	0.179574	-0.263361	0.792273	0.999999	no
Traf3ip2	chr10:39315670-39451813	GF_Ileum	CV_Ileum	10.7117	8.95978	-0.257655	0.488405	0.625263	0.999999	no
Rev3l	chr10:39451932-39595011	GF_Ileum	CV_Ileum	5.23418	5.08752	-0.0410029	0.0587518	0.95315	0.999999	no
2010001E11Rik,G630090E17Rik	chr10:39633977-39706452	GF_Ileum	CV_Ileum	1.21354	0.0183507	0	0	1	1	no
Cdk19	chr10:40069113-40203624	GF_Ileum	CV_Ileum	4.6857	5.00958	0.0964271	-0.21055	0.833238	0.999999	no
Slc22a16	chr10:40290167-40323938	GF_Ileum	CV_Ileum	0	0	0	0	1	1	no
Ddo	chr10:40349816-40369737	GF_Ileum	CV_Ileum	0.0599658	0.0323996	-0.888163	0.688451	0.491169	1	no
9030224M15Rik	chr10:40403087-40530889	GF_Ileum	CV_Ileum	0.105896	0.0616314	-0.780909	0.593864	0.552603	1	no
Wasf1	chr10:40603339-40658375	GF_Ileum	CV_Ileum	0.0645565	0.0730279	0.177886	-0.145487	0.884327	1	no
Zbtb24	chr10:41170201-41185421	GF_Ileum	CV_Ileum	9.1478	9.03111	-0.0185214	0.0334855	0.973287	0.999999	no
Mical1	chr10:41196000-41206836	GF_Ileum	CV_Ileum	8.82638	10.6583	0.272086	-0.5493	0.5828	0.989983	no
Ppil6	chr10:41210244-41234094	GF_Ileum	CV_Ileum	2.39682	1.53699	-0.641014	0.683036	0.494584	0.949851	no
Cd164	chr10:41239256-41252684	GF_Ileum	CV_Ileum	125.601	130.807	0.0585909	-0.121502	0.903294	0.999999	no
Sesn1	chr10:41530379-41628242	GF_Ileum	CV_Ileum	59.8364	61.9429	0.049916	-0.107759	0.914187	0.999999	no
Foxo3	chr10:41898550-41996548	GF_Ileum	CV_Ileum	8.70523	5.02798	-0.791904	0.93274	0.350954	0.848881	no
Snx3	chr10:42221859-42255175	GF_Ileum	CV_Ileum	89.9733	80.3131	-0.163861	0.385291	0.700022	0.999999	no
Ostm1	chr10:42398721-42422268	GF_Ileum	CV_Ileum	8.05499	10.0207	0.315024	-0.586275	0.55769	0.979931	no
Sec63	chr10:42481301-42563441	GF_Ileum	CV_Ileum	24.8574	23.8294	-0.0609333	0.106084	0.915516	0.999999	no
Scml4	chr10:42580317-42683386	GF_Ileum	CV_Ileum	7.41937	6.72037	-0.142757	0.282084	0.777879	0.999999	no
9030612E09Rik	chr10:42894509-42896368	GF_Ileum	CV_Ileum	0.00715833	0.00574082	-0.318368	0.0858628	0.931576	1	no
Pdss2	chr10:42940171-43184688	GF_Ileum	CV_Ileum	10.013	9.09842	-0.138181	0.208057	0.835185	0.999999	no
Bend3	chr10:43198945-43235223	GF_Ileum	CV_Ileum	1.27008	1.22225	-0.0553796	0.106499	0.915187	0.999999	no
-	chr10:43238384-43243910	GF_Ileum	CV_Ileum	0.806377	0.733582	-0.136496	0.189523	0.849683	0.999999	no
Cd24a	chr10:43298974-43304071	GF_Ileum	CV_Ileum	73.2904	57.7861	-0.342903	0.799793	0.423831	0.908254	no
F830002L21Rik	chr10:43313232-43350719	GF_Ileum	CV_Ileum	0	0.0397819	1.79769e+308	1.79769e+308	0.0617245	1	no
1700027J07Rik	chr10:43465963-43485642	GF_Ileum	CV_Ileum	0	0	0	0	1	1	no
Rtn4ip1	chr10:43593995-43668984	GF_Ileum	CV_Ileum	7.10633	5.17123	-0.458596	0.748152	0.454369	0.928666	no
Speer5-ps1	chr10:43890252-43939391	GF_Ileum	CV_Ileum	0.00960882	0.0195539	1.02502	-0.1963	0.844375	1	no
Atg5	chr10:43988155-44084103	GF_Ileum	CV_Ileum	17.2571	17.23	-0.00226594	0.00458409	0.996342	0.999999	no
Mir1929	chr10:43988155-44084103	GF_Ileum	CV_Ileum	0	0	0	0	1	1	no
Prep	chr10:44787019-44878801	GF_Ileum	CV_Ileum	18.9709	13.8723	-0.451577	1.0441	0.296439	0.79036	no
Popdc3	chr10:45009110-45038256	GF_Ileum	CV_Ileum	0	0	0	0	1	1	no
Bves	chr10:45055567-45089514	GF_Ileum	CV_Ileum	0	0.00619462	1.79769e+308	1.79769e+308	0.287998	1	no
Hace1	chr10:45297634-45432151	GF_Ileum	CV_Ileum	5.72815	6.27349	0.131198	-0.247625	0.804424	0.999999	no
D030045P18Rik	chr10:45527509-45571824	GF_Ileum	CV_Ileum	0	0	0	0	1	1	no
Ascc3	chr10:50312474-50571072	GF_Ileum	CV_Ileum	3.97547	4.93082	0.3107	-0.645087	0.518871	0.96173	no
Sim1	chr10:50615456-50708958	GF_Ileum	CV_Ileum	0.00167154	0.00243919	0.54522	-0.172072	0.863381	1	no
Gp49a	chr10:51200484-51206025	GF_Ileum	CV_Ileum	0.042571	0.0735091	0.78805	-0.434357	0.664029	1	no
Lilrb4	chr10:51210780-51216417	GF_Ileum	CV_Ileum	0.0468504	0.130246	1.47511	-0.979667	0.32725	1	no
Rfx6	chr10:51397565-51450235	GF_Ileum	CV_Ileum	0.579938	0.45199	-0.359608	0.394948	0.692882	0.999999	no
Vgll2	chr10:51742491-51748277	GF_Ileum	CV_Ileum	0	0	0	0	1	1	no
Dcbld1	chr10:51953395-52041183	GF_Ileum	CV_Ileum	15.601	14.0631	-0.149716	0.338409	0.735055	0.999999	no
Nepn	chr10:52111413-52124410	GF_Ileum	CV_Ileum	0	0	0	0	1	1	no
Nus1	chr10:52137352-52159998	GF_Ileum	CV_Ileum	26.5814	25.5028	-0.0597589	0.129609	0.896876	0.999999	no
Slc35f1	chr10:52410306-52831428	GF_Ileum	CV_Ileum	0.000218332	1.06e-05	-4.35917	0.0816934	0.934891	1	no
Gm19395	chr10:52997886-53099657	GF_Ileum	CV_Ileum	0	0	0	0	1	1	no
Pln	chr10:52997886-53099657	GF_Ileum	CV_Ileum	0.00552736	0	-1.79769e+308	-1.79769e+308	0.410832	1	no
Asf1a	chr10:53256088-53350245	GF_Ileum	CV_Ileum	3.9973	4.45705	0.157064	-0.21175	0.832302	0.999999	no
Gm16998	chr10:53795727-53800887	GF_Ileum	CV_Ileum	0.0458624	0.221681	2.2731	-1.32442	0.185365	1	no
Msl3l2	chr10:55734099-55948622	GF_Ileum	CV_Ileum	0.0994806	0.0855891	-0.216988	0.063485	0.94938	1	no
Gja1	chr10:56097105-56110225	GF_Ileum	CV_Ileum	0.0123124	0.00278135	-2.14626	0.673363	0.500716	1	no
Hsf2	chr10:57206190-57232949	GF_Ileum	CV_Ileum	1.16182	1.23873	0.0924708	-0.104449	0.916813	0.999999	no
Pkib	chr10:57351786-57460918	GF_Ileum	CV_Ileum	0	0.0184948	1.79769e+308	1.79769e+308	0.0670557	1	no
Fabp7	chr10:57504728-57508256	GF_Ileum	CV_Ileum	0	0	0	0	1	1	no
Smpdl3a	chr10:57514349-57531636	GF_Ileum	CV_Ileum	42.144	59.2266	0.490918	-1.05195	0.292822	0.786203	no
Gcc2	chr10:57718198-57768348	GF_Ileum	CV_Ileum	16.1172	17.9222	0.153149	-0.329198	0.742006	0.999999	no
Lims1	chr10:57786213-57887439	GF_Ileum	CV_Ileum	10.1034	10.7092	0.0839995	-0.17028	0.86479	0.999999	no
Ranbp2	chr10:57909380-57958046	GF_Ileum	CV_Ileum	9.87762	11.8232	0.259379	-0.59073	0.554701	0.978602	no
Ccdc138	chr10:57960662-58038992	GF_Ileum	CV_Ileum	1.89084	2.05984	0.123499	-0.16366	0.869999	0.999999	no
BB019430	chr10:58159492-58167025	GF_Ileum	CV_Ileum	0	0	0	0	1	1	no
Sh3rf3	chr10:58276106-58601664	GF_Ileum	CV_Ileum	0.00712024	0.00155661	-2.19352	0.717531	0.473046	1	no
Ankrd57	chr10:58604374-58689279	GF_Ileum	CV_Ileum	7.45736	8.45774	0.181608	-0.37557	0.707237	0.999999	no
P4ha1	chr10:58786043-58836052	GF_Ileum	CV_Ileum	1.07992	0.832944	-0.374633	0.529526	0.596441	0.994853	no
Pla2g12b	chr10:58866083-58884805	GF_Ileum	CV_Ileum	53.4845	56.7142	0.0845885	-0.177467	0.859142	0.999999	no
-	chr10:58884864-58909193	GF_Ileum	CV_Ileum	0.264568	0.494851	0.903353	-0.921637	0.356718	0.853811	no
Cbara1	chr10:59165285-59326875	GF_Ileum	CV_Ileum	94.6341	78.9352	-0.26169	0.548549	0.583315	0.990233	no
Dnajb12	chr10:59342234-59363321	GF_Ileum	CV_Ileum	30.2352	27.8936	-0.116296	0.222742	0.823736	0.999999	no
Ascc1	chr10:59449879-59562738	GF_Ileum	CV_Ileum	13.0416	9.34946	-0.480164	0.493163	0.621897	0.999999	no
Spock2	chr10:59569001-59597943	GF_Ileum	CV_Ileum	0.236943	0.115026	-1.04257	1.41583	0.156826	1	no
4632428N05Rik	chr10:59766021-60159238	GF_Ileum	CV_Ileum	0.0796047	0.184128	1.20979	-1.29586	0.195025	1	no
Gm17455	chr10:59766021-60159238	GF_Ileum	CV_Ileum	0	0	0	0	1	1	no
4930565A17	chr10:60494050-60500828	GF_Ileum	CV_Ileum	0	0	0	0	1	1	no
Pcbd1	chr10:60544900-60610413	GF_Ileum	CV_Ileum	58.3628	46.4654	-0.328893	0.271081	0.786329	0.999999	no
Tbata	chr10:60634711-60651589	GF_Ileum	CV_Ileum	0	0	0	0	1	1	no
Prf1	chr10:60760583-60767011	GF_Ileum	CV_Ileum	0.0269873	0.0655222	1.2797	-0.827382	0.408021	1	no
Nodal	chr10:60876583-60915675	GF_Ileum	CV_Ileum	0	0	0	0	1	1	no
Lrrc20	chr10:60938566-61045532	GF_Ileum	CV_Ileum	3.34681	2.58652	-0.371772	0.622173	0.533828	0.968949	no
Npffr1	chr10:61058231-61089133	GF_Ileum	CV_Ileum	0	0	0	0	1	1	no
Ppa1	chr10:61111368-61136913	GF_Ileum	CV_Ileum	73.3385	55.9348	-0.390827	0.918994	0.358099	0.855036	no
Sar1a	chr10:61143062-61156047	GF_Ileum	CV_Ileum	30.8336	25.8006	-0.257102	0.586843	0.557309	0.979811	no
Tysnd1	chr10:61158261-61165538	GF_Ileum	CV_Ileum	35.9869	23.0122	-0.64507	1.14679	0.251469	0.734116	no
Aifm2	chr10:61178010-61246612	GF_Ileum	CV_Ileum	7.48949	5.6311	-0.411451	0.657801	0.510666	0.957657	no
Mir5108	chr10:61178010-61246612	GF_Ileum	CV_Ileum	0	0	0	0	1	1	no
Gm5424	chr10:61533769-61535319	GF_Ileum	CV_Ileum	1.30891	0.472035	-1.4714	2.08881	0.0367244	0.235172	no
Neurog3	chr10:61570403-61602527	GF_Ileum	CV_Ileum	0.901296	0.912771	0.018253	-0.00692308	0.994476	0.999999	no
Tacr2	chr10:61715185-61728738	GF_Ileum	CV_Ileum	0	0	0	0	1	1	no
2210417K05Rik	chr10:61731602-61842812	GF_Ileum	CV_Ileum	0.0321885	0.172522	2.42216	-0.160127	0.872781	1	no
Supv3l1	chr10:61892008-61914101	GF_Ileum	CV_Ileum	3.31146	0	-1.79769e+308	-1.79769e+308	0.18439	0.629986	no
4930507D05Rik	chr10:61892008-61914101	GF_Ileum	CV_Ileum	0.0607554	0.333853	2.45813	-0.155201	0.876663	0.999999	no
Slc25a16	chr10:62383380-62409246	GF_Ileum	CV_Ileum	8.74153	8.42041	-0.053995	0.117177	0.90672	0.999999	no
Dna2	chr10:62409763-62436936	GF_Ileum	CV_Ileum	2.97013	2.51139	-0.24204	0.346446	0.729008	0.999999	no
Rufy2	chr10:62442970-62486705	GF_Ileum	CV_Ileum	1.62245	2.14394	0	0	1	1	no
Pbld1,Pbld2	chr10:62487259-62540842	GF_Ileum	CV_Ileum	92.8681	87.2892	-0.0893797	0.169605	0.865321	0.999999	no
Atoh7	chr10:62562903-62563353	GF_Ileum	CV_Ileum	0	0	0	0	1	1	no
Herc4	chr10:62706544-62801913	GF_Ileum	CV_Ileum	17.1315	18.5498	0.114751	-0.173748	0.862064	0.999999	no
Dnajc12	chr10:62845190-62871588	GF_Ileum	CV_Ileum	0.987603	0.579637	-0.768781	1.0502	0.293627	0.787135	no
Ctnna3	chr10:62892845-64466415	GF_Ileum	CV_Ileum	0.00451369	0.0073791	0.709137	-0.139292	0.889219	1	no
Jmjd1c	chr10:66471936-66719074	GF_Ileum	CV_Ileum	12.1064	16.866	0.478345	-0.392948	0.694358	0.999999	no
Egr2	chr10:67000616-67004936	GF_Ileum	CV_Ileum	0.120492	0.0403423	-1.57857	1.42906	0.152986	1	no
Rtkn2	chr10:67442345-67506612	GF_Ileum	CV_Ileum	0.0880833	0.0831247	-0.0835909	0.0873819	0.930368	1	no
Tmem26	chr10:68186493-68245402	GF_Ileum	CV_Ileum	0.00246244	0	-1.79769e+308	-1.79769e+308	0.288813	1	no
-	chr10:68613986-68637190	GF_Ileum	CV_Ileum	0.236218	0.456435	0.950291	-0.638025	0.523458	0.964276	no
Rhobtb1	chr10:68675404-68754532	GF_Ileum	CV_Ileum	0.780789	0.620273	-0.33203	0.508737	0.610936	0.99911	no
Ccdc6	chr10:69559868-69655948	GF_Ileum	CV_Ileum	16.7033	15.0021	-0.154969	0.346747	0.728782	0.999999	no
2310015B20Rik	chr10:69667414-69682459	GF_Ileum	CV_Ileum	0	0.0674424	1.79769e+308	1.79769e+308	0.217664	1	no
Slc16a9	chr10:69708023-69748720	GF_Ileum	CV_Ileum	0.042573	0.216776	2.34819	-1.7366	0.0824576	1	no
Fam13c	chr10:69903415-70062039	GF_Ileum	CV_Ileum	0	0	0	0	1	1	no
Ipmk	chr10:70810517-70848643	GF_Ileum	CV_Ileum	114.352	116.303	0.0244129	-0.0452553	0.963904	0.999999	no
Zwint	chr10:72117609-72137716	GF_Ileum	CV_Ileum	16.4978	11.9362	-0.466929	0.930795	0.35196	0.849675	no
Pcdh15	chr10:73284614-74112477	GF_Ileum	CV_Ileum	0	0	0	0	1	1	no
Gnaz	chr10:74420221-74495331	GF_Ileum	CV_Ileum	0.101211	0.0430629	-1.23285	1.01358	0.310782	1	no
Rab36	chr10:74499833-74516845	GF_Ileum	CV_Ileum	0.0728506	0.0612103	-0.251165	0.220486	0.825492	1	no
Bcr	chr10:74523338-74647668	GF_Ileum	CV_Ileum	23.2252	20.4627	-0.182691	0.321042	0.748179	0.999999	no
Specc1l	chr10:74674817-74775145	GF_Ileum	CV_Ileum	43.0597	38.061	-0.178025	0.344325	0.730602	0.999999	no
Adora2a	chr10:74779687-74797533	GF_Ileum	CV_Ileum	0.195134	0.254643	0.384005	-0.456532	0.648007	1	no
Gm5779	chr10:74814799-74815706	GF_Ileum	CV_Ileum	0.315464	0.129228	-1.28756	1.00925	0.312854	1	no
Upb1	chr10:74869778-74902940	GF_Ileum	CV_Ileum	1.67812	1.66254	-0.0134569	0.0160374	0.987205	0.999999	no
Snrpd3	chr10:74969014-74998185	GF_Ileum	CV_Ileum	25.3613	0	-1.79769e+308	-1.79769e+308	0.135242	0.532205	no
Snrpd3	chr10:74969014-74998185	GF_Ileum	CV_Ileum	60.0424	52.5503	-0.192281	0.150072	0.880708	0.999999	no
Ggt1	chr10:75026852-75048940	GF_Ileum	CV_Ileum	411.078	328.484	-0.32359	0.529044	0.596775	0.994949	no
Ggt5	chr10:75052125-75079713	GF_Ileum	CV_Ileum	0.0289251	0.0232599	-0.314476	0.22596	0.821233	1	no
Derl3	chr10:75356142-75358686	GF_Ileum	CV_Ileum	0.44589	0.310447	-0.522341	0.616723	0.537417	0.970689	no
Chchd10	chr10:75398317-75400493	GF_Ileum	CV_Ileum	103.903	88.6912	-0.22838	0.500026	0.617057	0.999999	no
Vpreb3	chr10:75411056-75412391	GF_Ileum	CV_Ileum	0.0287183	0	-1.79769e+308	-1.79769e+308	0.288813	1	no
Gm5134	chr10:75417258-75472334	GF_Ileum	CV_Ileum	0	3.28e-06	1.79769e+308	1.79769e+308	0.498706	1	no
Zfp280b	chr10:75495319-75505789	GF_Ileum	CV_Ileum	5.42943	5.53405	0.0275352	-0.0594552	0.95259	0.999999	no
Slc5a4a	chr10:75610195-75652144	GF_Ileum	CV_Ileum	31.0107	21.9149	-0.500856	0.966263	0.333913	0.831753	no
S100b	chr10:75716580-75724064	GF_Ileum	CV_Ileum	0	0.0570888	1.79769e+308	1.79769e+308	0.0427823	1	no
1700094J05Rik	chr10:75813854-75906075	GF_Ileum	CV_Ileum	0	0.200427	1.79769e+308	1.79769e+308	0.331655	1	no
2610028H24Rik	chr10:75911825-75978604	GF_Ileum	CV_Ileum	0	0.0069255	1.79769e+308	1.79769e+308	0.460152	1	no
Mcm3ap	chr10:75911825-75978604	GF_Ileum	CV_Ileum	9.5722	7.76746	-0.301408	0.606849	0.543951	0.973488	no
Lss	chr10:75994352-76019884	GF_Ileum	CV_Ileum	31.2349	17.5526	-0.831474	1.5153	0.129697	0.519723	no
1700027D21Rik	chr10:76024571-76032945	GF_Ileum	CV_Ileum	0.43822	0.0939384	-2.22187	1.88854	0.0589539	0.321804	no
Ftcd	chr10:76038392-76053083	GF_Ileum	CV_Ileum	0.0424389	0.00428659	-3.30749	1.26541	0.205724	1	no
Slc19a1	chr10:76495483-76513177	GF_Ileum	CV_Ileum	10.5196	6.77066	-0.635709	1.20479	0.228284	0.701476	no
Pofut2	chr10:76722044-76732331	GF_Ileum	CV_Ileum	10.6609	7.34062	-0.538354	1.00821	0.313352	0.809288	no
Gm17769	chr10:76881120-76883684	GF_Ileum	CV_Ileum	0.00503732	0	-1.79769e+308	-1.79769e+308	0.288813	1	no
Itgb2	chr10:76993092-77028419	GF_Ileum	CV_Ileum	0.159264	0.431097	1.43659	-1.72409	0.0846909	0.404691	no
Pttg1ip	chr10:77044511-77061479	GF_Ileum	CV_Ileum	154.82	139.847	-0.146739	0.280091	0.779408	0.999999	no
Sumo3	chr10:77068978-77081076	GF_Ileum	CV_Ileum	35.3238	27.9686	-0.336831	0.725678	0.468036	0.937489	no
Ube2g2	chr10:77085065-77108735	GF_Ileum	CV_Ileum	13.5168	8.13033	-0.733366	1.53399	0.125033	0.50891	no
Mir1930	chr10:77085065-77108735	GF_Ileum	CV_Ileum	0	0	0	0	1	1	no
Gm10272	chr10:77169331-77169731	GF_Ileum	CV_Ileum	0	0	0	0	1	1	no
Gm10024	chr10:77174201-77174754	GF_Ileum	CV_Ileum	0	0	0	0	1	1	no
Gm10142	chr10:77178551-77178914	GF_Ileum	CV_Ileum	0	0	0	0	1	1	no
Krtap12-1	chr10:77183330-77184001	GF_Ileum	CV_Ileum	0	0	0	0	1	1	no
Gm10100	chr10:77189230-77189593	GF_Ileum	CV_Ileum	0	0	0	0	1	1	no
Gm2696	chr10:77277426-77278149	GF_Ileum	CV_Ileum	0	0	0	0	1	1	no
Krtap10-10	chr10:77298691-77299996	GF_Ileum	CV_Ileum	0	0	0	0	1	1	no
Gm10318	chr10:77315603-77316533	GF_Ileum	CV_Ileum	0	0	0	0	1	1	no
Gm3285	chr10:77324719-77325383	GF_Ileum	CV_Ileum	0	0	0	0	1	1	no
1700009J07Rik	chr10:77356164-77358856	GF_Ileum	CV_Ileum	0	0.0121895	1.79769e+308	1.79769e+308	0.287998	1	no
1810043G02Rik	chr10:77441390-77449505	GF_Ileum	CV_Ileum	0.880741	0.685268	-0.362049	0.455022	0.649093	0.999999	no
Dnmt3l	chr10:77492775-77526360	GF_Ileum	CV_Ileum	0	0	0	0	1	1	no
Icosl	chr10:77532062-77542270	GF_Ileum	CV_Ileum	5.49033	5.24705	-0.0653854	0.119055	0.905232	0.999999	no
Cstb	chr10:77888414-77890367	GF_Ileum	CV_Ileum	61.2746	68.7553	0.166182	-0.375601	0.707213	0.999999	no
Ilvbl	chr10:78037244-78047247	GF_Ileum	CV_Ileum	82.7741	60.3665	-0.45543	1.00801	0.313452	0.809385	no
Olfr1357	chr10:78056580-78091842	GF_Ileum	CV_Ileum	1.04747	1.16919	0.158599	-0.109298	0.912966	0.999999	no
Slc1a6	chr10:78243240-78277570	GF_Ileum	CV_Ileum	0	0.00569684	1.79769e+308	1.79769e+308	0.267392	1	no
Olfr1355	chr10:78338293-78342851	GF_Ileum	CV_Ileum	0	0	0	0	1	1	no
Olfr1354	chr10:78379586-78380681	GF_Ileum	CV_Ileum	0	0	0	0	1	1	no
Olfr8	chr10:78417951-78418884	GF_Ileum	CV_Ileum	0	0	0	0	1	1	no
Olfr1353	chr10:78426053-78433357	GF_Ileum	CV_Ileum	0	0	0	0	1	1	no
Olfr1352	chr10:78443794-78447466	GF_Ileum	CV_Ileum	0	0	0	0	1	1	no
Olfr1351	chr10:78480068-78481028	GF_Ileum	CV_Ileum	0	0	0	0	1	1	no
Olfr57	chr10:78497467-78498547	GF_Ileum	CV_Ileum	0	0	0	0	1	1	no
Vmn2r80	chr10:78611560-78657678	GF_Ileum	CV_Ileum	0	0	0	0	1	1	no
Vmn2r81	chr10:78710521-78757280	GF_Ileum	CV_Ileum	0	0	0	0	1	1	no
Vmn2r82	chr10:78819335-78859511	GF_Ileum	CV_Ileum	0	0	0	0	1	1	no
Vmn2r83	chr10:78931702-78954899	GF_Ileum	CV_Ileum	0.00497254	0.0191214	1.94313	-0.688948	0.490856	1	no
Madcam1	chr10:79127318-79131281	GF_Ileum	CV_Ileum	0	0.00762706	1.79769e+308	1.79769e+308	0.293259	1	no
Gm16517	chr10:79132154-79138871	GF_Ileum	CV_Ileum	15.8421	14.0381	-0.174415	0.337645	0.735631	0.999999	no
Cdc34	chr10:79144939-79198853	GF_Ileum	CV_Ileum	37.761	32.8582	-0.200645	0.113607	0.909549	0.999999	no
Bsg	chr10:79144939-79198853	GF_Ileum	CV_Ileum	441.026	415.666	-0.0854377	0.156275	0.875816	0.999999	no
Gzmm	chr10:79144939-79198853	GF_Ileum	CV_Ileum	0.148592	0.098499	-0.59318	0.0203975	0.983726	1	no
Hcn2	chr10:79144939-79198853	GF_Ileum	CV_Ileum	2.6641	1.88707	-0.497503	0.0339154	0.972945	0.999999	no
Fgf22	chr10:79217863-79219706	GF_Ileum	CV_Ileum	0	0	0	0	1	1	no
Fstl3	chr10:79240018-79251730	GF_Ileum	CV_Ileum	1.52557	0.156386	-3.28616	2.0995	0.035773	0.231037	no
Palm	chr10:79256316-79283651	GF_Ileum	CV_Ileum	7.78286	6.08059	-0.356087	0.670074	0.50281	0.953798	no
9130017N09Rik	chr10:79283765-79293197	GF_Ileum	CV_Ileum	227.797	180.363	-0.336845	0.630253	0.528529	0.966637	no
Ptbp1	chr10:79314121-79337379	GF_Ileum	CV_Ileum	77.9451	61.335	-0.345747	0.730561	0.465047	0.935657	no
Prtn3	chr10:79342411-79345917	GF_Ileum	CV_Ileum	0	0	0	0	1	1	no
Elane	chr10:79349056-79350961	GF_Ileum	CV_Ileum	0	0	0	0	1	1	no
Cfd	chr10:79353597-79355401	GF_Ileum	CV_Ileum	0.142018	0.0494222	-1.52284	0.908642	0.363539	1	no
Kiss1r	chr10:79379715-79386789	GF_Ileum	CV_Ileum	0.133804	0.10199	-0.391701	0.483648	0.628635	1	no
Arid3a	chr10:79389816-79417757	GF_Ileum	CV_Ileum	0.507281	0.386458	-0.392473	0.45617	0.648268	0.999999	no
Wdr18	chr10:79422888-79432854	GF_Ileum	CV_Ileum	10.4297	6.20105	-0.75011	0.814017	0.415635	0.902356	no
Grin3b	chr10:79433468-79447075	GF_Ileum	CV_Ileum	0.289564	0.217418	-0.413412	0.0709482	0.943439	1	no
Cnn2	chr10:79451344-79458145	GF_Ileum	CV_Ileum	2.181	2.32486	0.092156	-0.153829	0.877745	0.999999	no
Abca7	chr10:79459208-79478320	GF_Ileum	CV_Ileum	15.7167	12.763	-0.300336	0.552903	0.58033	0.989192	no
Hmha1	chr10:79479416-79494216	GF_Ileum	CV_Ileum	0.483253	0.89896	0.895478	-1.12245	0.261673	0.74744	no
Gpx4	chr10:79516254-79519184	GF_Ileum	CV_Ileum	315.495	254.451	-0.310226	0.672105	0.501517	0.953095	no
Stk11	chr10:79578366-79602112	GF_Ileum	CV_Ileum	39.0245	30.4804	-0.356499	0.688631	0.491056	0.948388	no
Atp5d	chr10:79605059-79608563	GF_Ileum	CV_Ileum	390.909	296.79	-0.397392	0.86392	0.387632	0.880809	no
Midn	chr10:79610729-79621234	GF_Ileum	CV_Ileum	43.6812	36.9352	-0.242015	0.508574	0.611051	0.999142	no
1600002K03Rik,Cirbp	chr10:79630532-79637864	GF_Ileum	CV_Ileum	29.3543	31.8479	0.11763	-0.192838	0.847086	0.999999	no
Efna2	chr10:79642226-79652755	GF_Ileum	CV_Ileum	0.0984117	0.0286752	-1.77903	1.23744	0.215925	1	no
Mum1	chr10:79689342-79707889	GF_Ileum	CV_Ileum	9.00977	8.03782	-0.164686	0.238819	0.811246	0.999999	no
Ndufs7	chr10:79712196-79719537	GF_Ileum	CV_Ileum	133.958	91.7391	-0.546167	1.2398	0.215051	0.68092	no
Dazap1	chr10:79727248-79751158	GF_Ileum	CV_Ileum	40.6951	37.6006	-0.1141	0.222997	0.823538	0.999999	no
Rps15	chr10:79755175-79756859	GF_Ileum	CV_Ileum	713.414	571.204	-0.320733	0.724322	0.468868	0.937912	no
Apc2	chr10:79764564-79783293	GF_Ileum	CV_Ileum	0.00256245	0.00209566	-0.290123	0.0161644	0.987103	1	no
Reep6	chr10:79792889-79799186	GF_Ileum	CV_Ileum	114.329	85.935	-0.411877	0.903558	0.36623	0.862363	no
Plk5	chr10:79819203-79828234	GF_Ileum	CV_Ileum	4.48896	3.93175	-0.191208	0.328971	0.742178	0.999999	no
Onecut3	chr10:79957650-79980005	GF_Ileum	CV_Ileum	0.103746	0.0547358	-0.922493	1.04298	0.296956	1	no
Adat3,Scamp4	chr10:80065624-80078530	GF_Ileum	CV_Ileum	44.1759	27.582	-0.679532	1.34494	0.178644	0.6197	no
[truncated: 24,902 more rows]

## Sheet: CR vs. CV ileum
Table S3: Genes differentially expressed in the presence and absence of microbiota (CR vs. CV ileum).
gene	locus	sample_1	sample_2	value_1	value_2	log2.fold_change.	test_stat	p_value	q_value	significant
U90926	chr5:92638601-92653063	CR_Ileum	CV_Ileum	12.4787	0.0604572	-7.68933	3.38249	0.000718324	0.0114349	yes
Fn1	chr1:71632096-71699779	CR_Ileum	CV_Ileum	0.968316	0.00673752	-7.16711	4.81629	1.46255e-06	5.13805e-05	yes
9530053A07Rik	chr7:28914484-28949830	CR_Ileum	CV_Ileum	17.1683	0.183077	-6.55115	12.8951	0	0	yes
Csl	chr10:99220338-99222292	CR_Ileum	CV_Ileum	20.6747	0.245618	-6.39531	10.9985	0	0	yes
Tmem140	chr6:34813145-34828296	CR_Ileum	CV_Ileum	11.9531	0.154697	-6.27179	3.72292	0.000196935	0.00383867	yes
[truncated: 26,895 more rows]

## Sheet: CR vs. GF colon
Table S3: Genes differentially expressed in the presence and absence of microbiota (CR vs. GF colon).
[truncated: 26,901 more rows]

[truncated: 2 more sheets: CV vs. GF colon, CR vs. CV colon]
