# Supplementary material for: Microbiota modulate transcription in the intestinal epithelium without remodeling the accessible chromatin landscape
Source: HighWire-hosted journal article supplement (doi:10.1101/gr.165845.113), 2014-06-24
Supplement: Supplemental_TableS4.xlsx [file Supplemental_TableS4.xlsx]

## Sheet: Cluster1
Table S4: Hierarchical clustering of genes differentially regulated in the presence or absence of microbiota; Cluster 1
Category	Term	Count	%	PValue	Genes	List Total	Pop Hits	Pop Total	Fold Enrichment	Bonferroni	Benjamini	FDR
GOTERM_BP_FAT	GO:0007263~nitric oxide mediated signal transduction	2	4.34783	0.00558555	MT2, MT1	39	2	13588	348.41	0.874123	0.874123	7.43316
GOTERM_BP_FAT	GO:0010273~detoxification of copper ion	2	4.34783	0.00836693	MT2, MT1	39	3	13588	232.274	0.955345	0.788683	10.9403
GOTERM_BP_FAT	GO:0048878~chemical homeostasis	5	10.8696	0.0184133	UGT8A, MT2, MT1, CACNA1E, ATP12A	39	365	13588	4.77274	0.998968	0.89895	22.6076
GOTERM_BP_FAT	GO:0046688~response to copper ion	2	4.34783	0.0194169	MT2, MT1	39	7	13588	99.5458	0.999293	0.836955	23.6916
GOTERM_BP_FAT	GO:0006882~cellular zinc ion homeostasis	2	4.34783	0.0194169	MT2, MT1	39	7	13588	99.5458	0.999293	0.836955	23.6916
GOTERM_BP_FAT	GO:0055069~zinc ion homeostasis	2	4.34783	0.0221606	MT2, MT1	39	8	13588	87.1026	0.999749	0.809542	26.5838
GOTERM_BP_FAT	GO:0050801~ion homeostasis	4	8.69565	0.0480936	UGT8A, MT2, MT1, ATP12A	39	293	13588	4.75645	1	0.952139	49.3219
GOTERM_BP_FAT	GO:0016042~lipid catabolic process	3	6.52174	0.0538784	NCEH1, AKR1C18, PLA2G2F	39	134	13588	7.80023	1	0.946467	53.4076
GOTERM_BP_FAT	GO:0009611~response to wounding	4	8.69565	0.0722807	THBD, SAA2, SAA1, GJA1	39	347	13588	4.01626	1	0.968882	64.4628
GOTERM_BP_FAT	GO:0008202~steroid metabolic process	3	6.52174	0.074336	HMGCS2, AKR1C18, SAA1	39	161	13588	6.49212	1	0.95823	65.5332
GOTERM_BP_FAT	GO:0009636~response to toxin	2	4.34783	0.0780815	MT2, MT1	39	29	13588	24.0283	1	0.950612	67.4074
GOTERM_BP_FAT	GO:0042592~homeostatic process	5	10.8696	0.0788783	UGT8A, MT2, MT1, CACNA1E, ATP12A	39	584	13588	2.98296	1	0.93694	67.7937
GOTERM_BP_FAT	GO:0006953~acute-phase response	2	4.34783	0.0806653	SAA2, SAA1	39	30	13588	23.2274	1	0.925222	68.6447
GOTERM_BP_FAT	GO:0055080~cation homeostasis	3	6.52174	0.0934099	MT2, MT1, ATP12A	39	184	13588	5.6806	1	0.938645	74.1352
GOTERM_CC_FAT	GO:0005576~extracellular region	11	23.913	0.0115022	GCG, BMP3, CHGA, THBD, BMPER, SAA2, SAA1, CXCL12, CHGB, CPN2, PLA2G2F	35	1680	12504	2.33918	0.589672	0.589672	11.4903
GOTERM_CC_FAT	GO:0034703~cation channel complex	3	6.52174	0.0273699	CACNA1E, SCNN1G, SCNN1A	35	95	12504	11.2818	0.881975	0.656452	25.3824
GOTERM_CC_FAT	GO:0034706~sodium channel complex	2	4.34783	0.0347941	SCNN1G, SCNN1A	35	13	12504	54.9626	0.934576	0.597055	31.1773
GOTERM_CC_FAT	GO:0034364~high-density lipoprotein particle	2	4.34783	0.0426551	SAA2, SAA1	35	16	12504	44.6571	0.965145	0.567917	36.8664
GOTERM_CC_FAT	GO:0005615~extracellular space	5	10.8696	0.0485477	BMP3, THBD, SAA2, SAA1, CXCL12	35	511	12504	3.49567	0.978333	0.535314	40.8479
GOTERM_CC_FAT	GO:0005922~connexon complex	2	4.34783	0.0504539	GJA1, GJB5	35	19	12504	37.606	0.981433	0.485416	42.0863
GOTERM_CC_FAT	GO:0034702~ion channel complex	3	6.52174	0.0684207	CACNA1E, SCNN1G, SCNN1A	35	158	12504	6.78336	0.995735	0.541417	52.6575
GOTERM_CC_FAT	GO:0034358~plasma lipoprotein particle	2	4.34783	0.0709504	SAA2, SAA1	35	27	12504	26.4635	0.996541	0.507536	53.9964
GOTERM_CC_FAT	GO:0005921~gap junction	2	4.34783	0.0709504	GJA1, GJB5	35	27	12504	26.4635	0.996541	0.507536	53.9964
GOTERM_CC_FAT	GO:0032994~protein-lipid complex	2	4.34783	0.0709504	SAA2, SAA1	35	27	12504	26.4635	0.996541	0.507536	53.9964
GOTERM_CC_FAT	GO:0000267~cell fraction	5	10.8696	0.0766307	CYP2D10, NCEH1, AKR1C18, SCNN1G, SCNN1A	35	596	12504	2.99712	0.997843	0.494446	56.8788
GOTERM_MF_FAT	GO:0050699~WW domain binding	2	4.34783	0.0214725	SCNN1G, SCNN1A	33	9	13288	89.4815	0.933682	0.933682	22.1989
GOTERM_MF_FAT	GO:0043167~ion binding	16	34.7826	0.0290051	EGR1, CYP2D10, CYP2C65, NCEH1, ADH5, SOBP, ATP12A, CHGA, THBD, MT2, MT1, CACNA1E, SCNN1G, SCNN1A, CAR1, PLA2G2F	33	3934	13288	1.63769	0.974758	0.841123	28.8499
GOTERM_MF_FAT	GO:0046872~metal ion binding	15	32.6087	0.0531869	EGR1, CYP2D10, CYP2C65, ADH5, SOBP, ATP12A, CHGA, THBD, MT2, MT1, CACNA1E, SCNN1G, SCNN1A, CAR1, PLA2G2F	33	3850	13288	1.56883	0.998921	0.897432	46.8483
GOTERM_MF_FAT	GO:0015267~channel activity	4	8.69565	0.0566978	GJA1, CACNA1E, SCNN1G, SCNN1A	33	365	13288	4.41279	0.999322	0.838624	49.0834
GOTERM_MF_FAT	GO:0022803~passive transmembrane transporter activity	4	8.69565	0.0566978	GJA1, CACNA1E, SCNN1G, SCNN1A	33	365	13288	4.41279	0.999322	0.838624	49.0834
GOTERM_MF_FAT	GO:0043169~cation binding	15	32.6087	0.0570073	EGR1, CYP2D10, CYP2C65, ADH5, SOBP, ATP12A, CHGA, THBD, MT2, MT1, CACNA1E, SCNN1G, SCNN1A, CAR1, PLA2G2F	33	3885	13288	1.5547	0.999349	0.76948	49.2763
GOTERM_MF_FAT	GO:0005272~sodium channel activity	2	4.34783	0.0653464	SCNN1G, SCNN1A	33	28	13288	28.7619	0.999786	0.755344	54.2279
GOTERM_MF_FAT	GO:0031420~alkali metal ion binding	3	6.52174	0.0876255	SCNN1G, ATP12A, SCNN1A	33	206	13288	5.86408	0.999989	0.805551	65.3712
INTERPRO	IPR001819:Chromogranin A/B	2	4.34783	0.0048358	CHGA, CHGB	44	2	17763	403.705	0.487759	0.487759	5.54547
INTERPRO	IPR018054:Chromogranin, conserved site	2	4.34783	0.00724513	CHGA, CHGB	44	3	17763	269.136	0.633394	0.39452	8.20202
INTERPRO	IPR001990:Chromogranin/secretogranin	2	4.34783	0.00724513	CHGA, CHGB	44	3	17763	269.136	0.633394	0.39452	8.20202
INTERPRO	IPR018064:Metallothionein, vertebrate, metal binding site	2	4.34783	0.00964876	MT2, MT1	44	4	17763	201.852	0.737629	0.359815	10.784
INTERPRO	IPR003019:Metallothionein superfamily, eukaryotic	2	4.34783	0.00964876	MT2, MT1	44	4	17763	201.852	0.737629	0.359815	10.784
INTERPRO	IPR000006:Metallothionein, vertebrate	2	4.34783	0.00964876	MT2, MT1	44	4	17763	201.852	0.737629	0.359815	10.784
INTERPRO	IPR000096:Serum amyloid A protein	2	4.34783	0.0120467	SAA2, SAA1	44	5	17763	161.482	0.81223	0.341727	13.2935
INTERPRO	IPR004724:Epithelial sodium channel	2	4.34783	0.014439	SCNN1G, SCNN1A	44	6	17763	134.568	0.865623	0.330632	15.7325
INTERPRO	IPR001873:Na+ channel, amiloride-sensitive	2	4.34783	0.0192066	SCNN1G, SCNN1A	44	8	17763	100.926	0.931182	0.359847	20.4071
INTERPRO	IPR013092:Connexin, N-terminal	2	4.34783	0.0450283	GJA1, GJB5	44	19	17763	42.4952	0.998267	0.596794	41.8562
INTERPRO	IPR000500:Connexins	2	4.34783	0.0450283	GJA1, GJB5	44	19	17763	42.4952	0.998267	0.596794	41.8562
INTERPRO	IPR019570:Gap junction protein, cysteine-rich domain	2	4.34783	0.0450283	GJA1, GJB5	44	19	17763	42.4952	0.998267	0.596794	41.8562
INTERPRO	IPR017991:Connexin region	2	4.34783	0.0450283	GJA1, GJB5	44	19	17763	42.4952	0.998267	0.596794	41.8562
INTERPRO	IPR018170:Aldo/keto reductase, conserved site	2	4.34783	0.0450283	AKR1C18, AKR1C19	44	19	17763	42.4952	0.998267	0.596794	41.8562
INTERPRO	IPR017990:Connexin, conserved site	2	4.34783	0.0450283	GJA1, GJB5	44	19	17763	42.4952	0.998267	0.596794	41.8562
INTERPRO	IPR001395:Aldo/keto reductase	2	4.34783	0.0519546	AKR1C18, AKR1C19	44	22	17763	36.7004	0.999366	0.601616	46.6301
KEGG_PATHWAY	mmu00982:Drug metabolism	3	6.52174	0.0249699	CYP2D10, CYP2C65, ADH5	20	75	5738	11.476	0.671305	0.671305	21.0676
PIR_SUPERFAMILY	PIRSF006832:human amiloride-sensitive sodium channel protein	2	4.34783	0.0117545	SCNN1G, SCNN1A	33	3	8136	164.364	0.354347	0.354347	10.0729
PIR_SUPERFAMILY	PIRSF002472:amyloid protein, SAA type	2	4.34783	0.0156428	SAA2, SAA1	33	4	8136	123.273	0.44198	0.252992	13.2005
PIR_SUPERFAMILY	PIRSF002564:metallothionein	2	4.34783	0.0156428	MT2, MT1	33	4	8136	123.273	0.44198	0.252992	13.2005
PIR_SUPERFAMILY	PIRSF002472:Serum_amyloid_A	2	4.34783	0.0195164	SAA2, SAA1	33	5	8136	98.6182	0.517727	0.215792	16.2198
PIR_SUPERFAMILY	PIRSF002292:gap junction protein	2	4.34783	0.0462205	GJA1, GJB5	33	12	8136	41.0909	0.82639	0.354504	34.6177
SMART	SM00197:SAA	2	4.34783	0.011449	SAA2, SAA1	22	5	9131	166.018	0.258731	0.258731	9.01108
SMART	SM00037:CNX	2	4.34783	0.0428459	GJA1, GJB5	22	19	9131	43.689	0.679721	0.434068	30.1709
SP_PIR_KEYWORDS	acetylated amino end	3	6.52174	0.00126938	ADH5, MT2, MT1	44	22	17854	55.3326	0.148975	0.148975	1.46225
SP_PIR_KEYWORDS	Secreted	10	21.7391	0.00590803	GCG, BMP3, CHGA, BMPER, SAA2, SAA1, CXCL12, CHGB, CPN2, PLA2G2F	44	1420	17854	2.85755	0.528834	0.313585	6.6411
SP_PIR_KEYWORDS	glycoprotein	17	36.9565	0.00725508	BMP3, NCEH1, UGT8A, SLC6A14, CPN2, CHGA, BMPER, THBD, ST3GAL5, LRRTM1, CACNA1E, SCNN1G, MFAP3L, CNTN3, SCNN1A, CHGB, PLA2G2F	44	3600	17854	1.91615	0.603371	0.265269	8.09771
SP_PIR_KEYWORDS	signal	15	32.6087	0.00779297	BMP3, UGT8A, CXCL12, CPN2, GCG, CHGA, BMPER, THBD, SAA2, SAA1, LRRTM1, MFAP3L, CNTN3, CHGB, PLA2G2F	44	2970	17854	2.04936	0.629753	0.219949	8.67353
SP_PIR_KEYWORDS	metal-thiolate cluster	2	4.34783	0.00959975	MT2, MT1	44	4	17854	202.886	0.706259	0.217305	10.5837
SP_PIR_KEYWORDS	metal binding	2	4.34783	0.0119856	MT2, MT1	44	5	17854	162.309	0.78376	0.22526	13.05
SP_PIR_KEYWORDS	cleavage on pair of basic residues	4	8.69565	0.0195095	GCG, BMP3, CHGA, CHGB	44	238	17854	6.81971	0.918095	0.300547	20.4265
SP_PIR_KEYWORDS	amyloid	2	4.34783	0.02853	SAA2, SAA1	44	12	17854	67.6288	0.974676	0.368401	28.5145
SP_PIR_KEYWORDS	hdl	2	4.34783	0.0401814	SAA2, SAA1	44	17	17854	47.738	0.99453	0.439379	37.8492
SP_PIR_KEYWORDS	gap junction	2	4.34783	0.0539831	GJA1, GJB5	44	23	17854	35.2846	0.999131	0.505785	47.459
SP_PIR_KEYWORDS	acute phase	2	4.34783	0.0562644	SAA2, SAA1	44	24	17854	33.8144	0.99936	0.487569	48.9098
SP_PIR_KEYWORDS	disulfide bond	11	23.913	0.0649253	BMP3, CHGA, THBD, ST3GAL5, GJA1, CACNA1E, CNTN3, MFAP3L, CXCL12, CHGB, PLA2G2F	44	2469	17854	1.80782	0.999802	0.508575	54.0905
SP_PIR_KEYWORDS	sodium channel	2	4.34783	0.0653362	SCNN1G, SCNN1A	44	28	17854	28.9838	0.999812	0.483196	54.3239
SP_PIR_KEYWORDS	amidation	2	4.34783	0.0920435	GCG, CHGA	44	40	17854	20.2886	0.999995	0.583524	67.3654
SP_PIR_KEYWORDS	Taste	2	4.34783	0.0964216	SCNN1G, SCNN1A	44	42	17854	19.3225	0.999997	0.576184	69.1445
UP_SEQ_FEATURE	region of interest:Alpha	2	4.34783	0.00765827	MT2, MT1	42	3	16021	254.302	0.718741	0.718741	8.90947
UP_SEQ_FEATURE	region of interest:Beta	2	4.34783	0.00765827	MT2, MT1	42	3	16021	254.302	0.718741	0.718741	8.90947
UP_SEQ_FEATURE	metal ion-binding site:Divalent metal cation; cluster A	2	4.34783	0.0101983	MT2, MT1	42	4	16021	190.726	0.815731	0.570734	11.6996
UP_SEQ_FEATURE	metal ion-binding site:Divalent metal cation; cluster B	2	4.34783	0.0101983	MT2, MT1	42	4	16021	190.726	0.815731	0.570734	11.6996
UP_SEQ_FEATURE	signal peptide	15	32.6087	0.0124834	BMP3, UGT8A, CXCL12, CPN2, GCG, CHGA, BMPER, THBD, SAA2, SAA1, LRRTM1, MFAP3L, CNTN3, CHGB, PLA2G2F	42	2963	16021	1.93108	0.874157	0.498879	14.1425
UP_SEQ_FEATURE	topological domain:Cytoplasmic	13	28.2609	0.0413693	NCEH1, SLC6A14, GJA1, MAL, GJB5, ATP12A, THBD, ST3GAL5, LRRTM1, CACNA1E, MFAP3L, SCNN1G, SCNN1A	42	2780	16021	1.78377	0.999061	0.824968	40.1205
UP_SEQ_FEATURE	glycosylation site:N-linked (GlcNAc...)	15	32.6087	0.042344	BMP3, NCEH1, UGT8A, SLC6A14, CPN2, BMPER, THBD, ST3GAL5, LRRTM1, CACNA1E, SCNN1G, MFAP3L, CNTN3, SCNN1A, PLA2G2F	42	3444	16021	1.66138	0.999206	0.760164	40.8554
UP_SEQ_FEATURE	topological domain:Lumenal	4	8.69565	0.0888997	NCEH1, ST3GAL5, LRRTM1, ATP12A	42	414	16021	3.68553	1	0.922719	67.7001

## Sheet: Cluster2
Table S4: Hierarchical clustering of genes differentially regulated in the presence or absence of microbiota; Cluster 2
Category	Term	Count	%	PValue	Genes	List Total	Pop Hits	Pop Total	Fold Enrichment	Bonferroni	Benjamini	FDR
GOTERM_BP_FAT	GO:0000184~nuclear-transcribed mRNA catabolic process, nonsense-mediated decay	2	5	0.0486216	B020018G12RIK, GM8994	27	26	13588	38.7123	0.999965	0.967372	46.6213
GOTERM_BP_FAT	GO:0000956~nuclear-transcribed mRNA catabolic process	2	5	0.0613185	B020018G12RIK, GM8994	27	33	13588	30.5006	0.999998	0.886117	54.931
GOTERM_BP_FAT	GO:0006091~generation of precursor metabolites and energy	3	7.5	0.0883788	BC002163, CSL, GM12070	27	261	13588	5.78459	1	0.879719	68.8199
GOTERM_BP_FAT	GO:0006396~RNA processing	4	10	0.0496871	B020018G12RIK, GM8994, NPM3-PS1, TRMT12	27	437	13588	4.60649	0.999972	0.927534	47.3693
GOTERM_BP_FAT	GO:0006401~RNA catabolic process	2	5	0.0879799	B020018G12RIK, GM8994	27	48	13588	20.9691	1	0.90665	68.6476
GOTERM_BP_FAT	GO:0006402~mRNA catabolic process	2	5	0.0774039	B020018G12RIK, GM8994	27	42	13588	23.9647	1	0.906601	63.7478
GOTERM_BP_FAT	GO:0006412~translation	8	20	1.6492e-06	GM6900, GM12034, WDR89, GM5148, GM13611, GM4987, GM6654, EIF2AK2, GM16378	27	319	13588	12.6209	0.000339677	0.000339677	0.00207708
GOTERM_BP_FAT	GO:0034470~ncRNA processing	3	7.5	0.0363847	GM8994, NPM3-PS1, TRMT12	27	158	13588	9.55556	0.999517	0.978017	37.2992
GOTERM_BP_FAT	GO:0034660~ncRNA metabolic process	3	7.5	0.0565958	GM8994, NPM3-PS1, TRMT12	27	202	13588	7.47415	0.999994	0.909312	51.9903
GOTERM_CC_FAT	GO:0005739~mitochondrion	7	17.5	0.0350624	OPA3, BC002163, GM6222, HSPA1A, HSPA1B, CSL, GM12070, 1110008F13RIK	25	1322	12504	2.64835	0.92345	0.474	31.0307
GOTERM_CC_FAT	GO:0005840~ribosome	6	15	2.71641e-05	GM12034, WDR89, GM5148, GM13611, GM4987, GM6654	25	192	12504	15.63	0.00195393	0.000977442	0.0282708
GOTERM_CC_FAT	GO:0015935~small ribosomal subunit	2	5	0.0542511	GM12034, GM5148	25	29	12504	34.4938	0.981976	0.552109	44.0428
GOTERM_CC_FAT	GO:0030529~ribonucleoprotein complex	8	20	1.7994e-05	B020018G12RIK, GM12034, GM8994, WDR89, GM5148, GM13611, GM4987, GM6654	25	462	12504	8.66078	0.00129474	0.00129474	0.018728
GOTERM_CC_FAT	GO:0031974~membrane-enclosed lumen	6	15	0.068365	B020018G12RIK, GM4535, GM8994, NPM3-PS1, PPIB, HSPA1A, HSPA1B	25	1174	12504	2.55618	0.993895	0.471297	52.1495
GOTERM_CC_FAT	GO:0043228~non-membrane-bounded organelle	11	27.5	0.00175311	GM6682, GM12034, GM12657, EPPK1, NPM3-PS1, WDR89, GM5148, MFAP1B, GM13611, GM4987, GM6654	25	1919	12504	2.86699	0.11868	0.0412371	1.80979
GOTERM_CC_FAT	GO:0043232~intracellular non-membrane-bounded organelle	11	27.5	0.00175311	GM6682, GM12034, GM12657, EPPK1, NPM3-PS1, WDR89, GM5148, MFAP1B, GM13611, GM4987, GM6654	25	1919	12504	2.86699	0.11868	0.0412371	1.80979
GOTERM_CC_FAT	GO:0043233~organelle lumen	6	15	0.0609142	B020018G12RIK, GM4535, GM8994, NPM3-PS1, PPIB, HSPA1A, HSPA1B	25	1136	12504	2.64169	0.989166	0.476093	48.0129
GOTERM_CC_FAT	GO:0070013~intracellular organelle lumen	6	15	0.0603476	B020018G12RIK, GM4535, GM8994, NPM3-PS1, PPIB, HSPA1A, HSPA1B	25	1133	12504	2.64868	0.988685	0.526187	47.6855
GOTERM_MF_FAT	GO:0000166~nucleotide binding	12	30	0.00159357	GM6682, HSPA1A, UBE2H, HSPA1B, RRAGC, B020018G12RIK, HSPH1, GM8994, GM5088, GM13034, EIF2AK2, GM12070, NKIRAS2	27	2183	13288	2.70535	0.119783	0.0416373	1.6812
GOTERM_MF_FAT	GO:0001882~nucleoside binding	7	17.5	0.0758448	HSPH1, GM8994, GM13034, HSPA1A, HSPA1B, UBE2H, EIF2AK2, RRAGC	27	1558	13288	2.21119	0.998182	0.594012	56.7657
GOTERM_MF_FAT	GO:0001883~purine nucleoside binding	7	17.5	0.0739585	HSPH1, GM8994, GM13034, HSPA1A, HSPA1B, UBE2H, EIF2AK2, RRAGC	27	1548	13288	2.22548	0.99786	0.641018	55.8183
GOTERM_MF_FAT	GO:0003735~structural constituent of ribosome	6	15	9.62068e-06	GM12034, WDR89, GM5148, GM13611, GM4987, GM6654	27	151	13288	19.5556	0.000769362	0.000769362	0.0102274
GOTERM_MF_FAT	GO:0005198~structural molecule activity	7	17.5	0.000188586	GM6682, GM12034, WDR89, GM5148, GM13611, GM4987, GM6654	27	450	13288	7.65564	0.014975	0.00751577	0.200307
GOTERM_MF_FAT	GO:0017076~purine nucleotide binding	9	22.5	0.0226114	HSPH1, GM6682, GM8994, GM13034, HSPA1A, HSPA1B, UBE2H, EIF2AK2, NKIRAS2, RRAGC	27	1871	13288	2.36736	0.839535	0.306452	21.5842
GOTERM_MF_FAT	GO:0032553~ribonucleotide binding	9	22.5	0.0179827	HSPH1, GM6682, GM8994, GM13034, HSPA1A, HSPA1B, UBE2H, EIF2AK2, NKIRAS2, RRAGC	27	1796	13288	2.46622	0.76583	0.304363	17.545
GOTERM_MF_FAT	GO:0032555~purine ribonucleotide binding	9	22.5	0.0179827	HSPH1, GM6682, GM8994, GM13034, HSPA1A, HSPA1B, UBE2H, EIF2AK2, NKIRAS2, RRAGC	27	1796	13288	2.46622	0.76583	0.304363	17.545
INTERPRO	IPR001023:Heat shock protein Hsp70	2	5	0.0202526	HSPH1, HSPA1A, HSPA1B	34	11	17763	94.9893	0.859733	0.859733	20.1764
INTERPRO	IPR013126:Heat shock protein 70	2	5	0.0202526	HSPH1, HSPA1A, HSPA1B	34	11	17763	94.9893	0.859733	0.859733	20.1764
INTERPRO	IPR018181:Heat shock protein 70, conserved site	2	5	0.0238919	HSPH1, HSPA1A, HSPA1B	34	13	17763	80.3756	0.901871	0.686744	23.3821
KEGG_PATHWAY	mmu03010:Ribosome	5	12.5	6.47957e-05	GM12034, WDR89, GM5148, GM13611, GM6654	16	89	5738	20.1475	0.00148924	0.00148924	0.0513479
KEGG_PATHWAY	mmu03040:Spliceosome	3	7.5	0.0404824	B020018G12RIK, GM8994, HSPA1A, HSPA1B	16	124	5738	8.67641	0.61344	0.37826	27.9316
SP_PIR_KEYWORDS	acetylation	17	42.5	1.55133e-07	GM6682, GM12034, GM6654, UBE2H, GM6900, B020018G12RIK, GM8994, GM12657, NPM3-PS1, GM13034, WDR89, GM5148, MFAP1B, GM13611, EIF2AK2, GM12070, GM16379, GM16378	31	2325	17854	4.21114	1.31862e-05	1.31862e-05	0.000166903
SP_PIR_KEYWORDS	atp-binding	6	15	0.0610983	HSPH1, GM8994, GM13034, HSPA1A, HSPA1B, UBE2H, EIF2AK2	31	1287	17854	2.68501	0.995293	0.488213	49.251
SP_PIR_KEYWORDS	cytoplasm	10	25	0.0555607	HSPH1, B020018G12RIK, GM4535, GM8994, EPPK1, HSPA1A, HSPA1B, GM12070, GM16379, NKIRAS2, RRAGC	31	3029	17854	1.9014	0.992241	0.500492	45.9365
SP_PIR_KEYWORDS	gtp-binding	3	7.5	0.0967159	GM6682, NKIRAS2, RRAGC	31	313	17854	5.52015	0.999824	0.513493	66.5246
SP_PIR_KEYWORDS	Initiation factor	2	5	0.0884732	GM6900, EIF2AK2, GM16378	31	55	17854	20.9431	0.999619	0.54497	63.0878
SP_PIR_KEYWORDS	mRNA transport	2	5	0.09613	B020018G12RIK, GM8994	31	60	17854	19.1978	0.999814	0.542049	66.2902
SP_PIR_KEYWORDS	nonsense-mediated mrna decay	2	5	0.0411983	B020018G12RIK, GM8994	31	25	17854	46.0748	0.972014	0.448992	36.4047
SP_PIR_KEYWORDS	nucleotide-binding	9	22.5	0.00447892	HSPH1, GM6682, GM8994, GM13034, HSPA1A, HSPA1B, UBE2H, EIF2AK2, NKIRAS2, RRAGC	31	1631	17854	3.17806	0.317207	0.0909823	4.7148
SP_PIR_KEYWORDS	phosphoprotein	17	42.5	0.0328918	GM6682, GM12034, EPPK1, GM6654, RRAGC, GM6900, HSPH1, B020018G12RIK, GM8994, NPM3-PS1, GM12657, GM13034, WDR89, MFAP1B, EIF2AK2, GM12070, GM16379, GM16378	31	6311	17854	1.5514	0.941739	0.433661	30.2201
SP_PIR_KEYWORDS	ribonucleoprotein	5	12.5	0.000973009	GM12034, WDR89, GM5148, GM13611, GM6654	31	266	17854	10.8259	0.0794151	0.0272051	1.04188
SP_PIR_KEYWORDS	ribosomal protein	6	15	1.05481e-05	GM12034, WDR89, GM5148, GM13611, GM4987, GM6654	31	177	17854	19.5232	0.000896193	0.000448197	0.0113478
SP_PIR_KEYWORDS	stress response	2	5	0.072971	HSPH1, HSPA1A, HSPA1B	31	45	17854	25.5971	0.998404	0.511106	55.7446
UP_SEQ_FEATURE	nucleotide phosphate-binding region:GTP	3	7.5	0.0875105	GM6682, NKIRAS2, RRAGC	30	274	16021	5.84708	1	1	66.8662

## Sheet: Cluster3
Table S4: Hierarchical clustering of genes differentially regulated in the presence or absence of microbiota; Cluster 3
Category	Term	Count	%	PValue	Genes	List Total	Pop Hits	Pop Total	Fold Enrichment	Bonferroni	Benjamini	FDR
GOTERM_BP_FAT	GO:0006955~immune response	5	12.8205	0.00533582	PGLYRP1, TGTP2, GBP3, GBP2, TGFB1	22	471	13588	6.55665	0.929229	0.929229	7.40499
GOTERM_BP_FAT	GO:0042127~regulation of cell proliferation	5	12.8205	0.00850286	LAMA5, IFITM3, PLCD3, TGFB1, SLFN2	22	538	13588	5.74011	0.985403	0.87918	11.5555
GOTERM_BP_FAT	GO:0051129~negative regulation of cellular component organization	3	7.69231	0.00894235	CAPG, SPNA1, TGFB1	22	93	13588	19.9238	0.988279	0.772845	12.1175
GOTERM_BP_FAT	GO:0033043~regulation of organelle organization	3	7.69231	0.0232742	CAPG, SPNA1, TGFB1	22	154	13588	12.0319	0.999991	0.945754	28.7261
GOTERM_BP_FAT	GO:0032535~regulation of cellular component size	3	7.69231	0.0252814	CAPG, SPNA1, TGFB1	22	161	13588	11.5088	0.999997	0.920741	30.8037
GOTERM_BP_FAT	GO:0051693~actin filament capping	2	5.12821	0.0289782	CAPG, SPNA1	22	19	13588	65.0144	1	0.911612	34.4833
GOTERM_BP_FAT	GO:0030835~negative regulation of actin filament depolymerization	2	5.12821	0.0319816	CAPG, SPNA1	22	21	13588	58.8225	1	0.899591	37.3378
GOTERM_BP_FAT	GO:0030834~regulation of actin filament depolymerization	2	5.12821	0.0364701	CAPG, SPNA1	22	24	13588	51.4697	1	0.899617	41.3888
GOTERM_BP_FAT	GO:0030837~negative regulation of actin filament polymerization	2	5.12821	0.0379618	CAPG, SPNA1	22	25	13588	49.4109	1	0.880992	42.6802
GOTERM_BP_FAT	GO:0031333~negative regulation of protein complex assembly	2	5.12821	0.0409387	CAPG, SPNA1	22	27	13588	45.7508	1	0.873703	45.1787
GOTERM_BP_FAT	GO:0032272~negative regulation of protein polymerization	2	5.12821	0.0409387	CAPG, SPNA1	22	27	13588	45.7508	1	0.873703	45.1787
GOTERM_BP_FAT	GO:0008285~negative regulation of cell proliferation	3	7.69231	0.0462601	IFITM3, TGFB1, SLFN2	22	224	13588	8.27192	1	0.881328	49.3941
GOTERM_BP_FAT	GO:0043242~negative regulation of protein complex disassembly	2	5.12821	0.0527589	CAPG, SPNA1	22	35	13588	35.2935	1	0.893095	54.1329
GOTERM_BP_FAT	GO:0043244~regulation of protein complex disassembly	2	5.12821	0.0644402	CAPG, SPNA1	22	43	13588	28.7273	1	0.920842	61.6286
GOTERM_BP_FAT	GO:0030833~regulation of actin filament polymerization	2	5.12821	0.067339	CAPG, SPNA1	22	45	13588	27.4505	1	0.91498	63.3033
GOTERM_BP_FAT	GO:0014031~mesenchymal cell development	2	5.12821	0.0702293	LAMA5, TGFB1	22	47	13588	26.2824	1	0.909551	64.9052
GOTERM_BP_FAT	GO:0051494~negative regulation of cytoskeleton organization	2	5.12821	0.0716712	CAPG, SPNA1	22	48	13588	25.7348	1	0.899821	65.6798
GOTERM_BP_FAT	GO:0048762~mesenchymal cell differentiation	2	5.12821	0.073111	LAMA5, TGFB1	22	49	13588	25.2096	1	0.890371	66.4373
GOTERM_BP_FAT	GO:0008064~regulation of actin polymerization or depolymerization	2	5.12821	0.0745487	CAPG, SPNA1	22	50	13588	24.7055	1	0.881225	67.1782
GOTERM_BP_FAT	GO:0060485~mesenchyme development	2	5.12821	0.0745487	LAMA5, TGFB1	22	50	13588	24.7055	1	0.881225	67.1782
GOTERM_BP_FAT	GO:0030832~regulation of actin filament length	2	5.12821	0.0759842	CAPG, SPNA1	22	51	13588	24.221	1	0.872398	67.9028
GOTERM_BP_FAT	GO:0032271~regulation of protein polymerization	2	5.12821	0.0845531	CAPG, SPNA1	22	57	13588	21.6715	1	0.887689	71.9274
GOTERM_BP_FAT	GO:0032956~regulation of actin cytoskeleton organization	2	5.12821	0.0888091	CAPG, SPNA1	22	60	13588	20.5879	1	0.88833	73.7469
GOTERM_BP_FAT	GO:0032970~regulation of actin filament-based process	2	5.12821	0.0902236	CAPG, SPNA1	22	61	13588	20.2504	1	0.880867	74.3269
GOTERM_BP_FAT	GO:0010639~negative regulation of organelle organization	2	5.12821	0.0916359	CAPG, SPNA1	22	62	13588	19.9238	1	0.873619	74.8941
GOTERM_BP_FAT	GO:0048585~negative regulation of response to stimulus	2	5.12821	0.0958606	NT5E, TGFB1	22	65	13588	19.0042	1	0.874872	76.5219
GOTERM_BP_FAT	GO:0043254~regulation of protein complex assembly	2	5.12821	0.0958606	CAPG, SPNA1	22	65	13588	19.0042	1	0.874872	76.5219
GOTERM_CC_FAT	GO:0005576~extracellular region	11	28.2051	0.00178634	NOV, RETNLB, EPHB6, CEACAM10, LAMA5, REG4, CAPG, PGLYRP1, EXPI, COL8A1, TGFB1	28	1680	12504	2.92398	0.104929	0.104929	1.78811
GOTERM_CC_FAT	GO:0031225~anchored to membrane	4	10.2564	0.00976065	LY6A, BST2, CD177, NT5E	28	207	12504	8.6294	0.455634	0.262188	9.42424
GOTERM_CC_FAT	GO:0044421~extracellular region part	6	15.3846	0.0232267	CEACAM10, LAMA5, REG4, PGLYRP1, COL8A1, TGFB1	28	774	12504	3.46179	0.767076	0.384722	21.1133
GOTERM_CC_FAT	GO:0005615~extracellular space	4	10.2564	0.0962166	CEACAM10, REG4, PGLYRP1, TGFB1	28	511	12504	3.49567	0.998112	0.791552	63.9734
GOTERM_MF_FAT	GO:0003924~GTPase activity	5	12.8205	8.88291e-05	IRGM2, IIGP1, TGTP2, GBP3, GBP2	26	128	13288	19.9639	0.00699325	0.00699325	0.0941601
GOTERM_MF_FAT	GO:0005525~GTP binding	5	12.8205	0.00402235	IRGM2, IIGP1, TGTP2, GBP3, GBP2	26	354	13288	7.2186	0.272693	0.147177	4.18412
GOTERM_MF_FAT	GO:0019001~guanyl nucleotide binding	5	12.8205	0.00439867	IRGM2, IIGP1, TGTP2, GBP3, GBP2	26	363	13288	7.03963	0.294086	0.109602	4.56734
GOTERM_MF_FAT	GO:0032561~guanyl ribonucleotide binding	5	12.8205	0.00439867	IRGM2, IIGP1, TGTP2, GBP3, GBP2	26	363	13288	7.03963	0.294086	0.109602	4.56734
GOTERM_MF_FAT	GO:0000166~nucleotide binding	9	23.0769	0.0413445	EPHB6, IRGM2, IIGP1, SLFN5, TGTP2, NT5E, GBP3, GBP2, SLFN2	26	2183	13288	2.10705	0.964409	0.565654	36.0946
GOTERM_MF_FAT	GO:0032555~purine ribonucleotide binding	8	20.5128	0.0430244	EPHB6, IRGM2, IIGP1, SLFN5, TGTP2, GBP3, GBP2, SLFN2	26	1796	13288	2.27651	0.969014	0.500847	37.2722
GOTERM_MF_FAT	GO:0032553~ribonucleotide binding	8	20.5128	0.0430244	EPHB6, IRGM2, IIGP1, SLFN5, TGTP2, GBP3, GBP2, SLFN2	26	1796	13288	2.27651	0.969014	0.500847	37.2722
GOTERM_MF_FAT	GO:0005178~integrin binding	2	5.12821	0.0460288	LAMA5, ITGA5	26	25	13288	40.8862	0.97583	0.462291	39.3294
GOTERM_MF_FAT	GO:0017076~purine nucleotide binding	8	20.5128	0.0520671	EPHB6, IRGM2, IIGP1, SLFN5, TGTP2, GBP3, GBP2, SLFN2	26	1871	13288	2.18526	0.985364	0.453086	43.2802
GOTERM_MF_FAT	GO:0005509~calcium ion binding	5	12.8205	0.0695819	ITGA5, PLCD3, SPNA1, TRPV6, S100A14	26	840	13288	3.04212	0.996646	0.509435	53.4583
INTERPRO	IPR007743:Interferon-inducible GTPase	3	7.69231	0.000300354	IRGM2, IIGP1, TGTP2	34	14	17763	111.952	0.0333754	0.0333754	0.340501
INTERPRO	IPR003191:Guanylate-binding protein, C-terminal	2	5.12821	0.0166001	GBP3, GBP2	34	9	17763	116.098	0.849164	0.611624	17.3095
INTERPRO	IPR007421:ATPase associated with various cellular activities, AAA-4	2	5.12821	0.0166001	SLFN5, SLFN2	34	9	17763	116.098	0.849164	0.611624	17.3095
INTERPRO	IPR015894:Guanylate-binding protein, N-terminal	2	5.12821	0.0238919	GBP3, GBP2	34	13	17763	80.3756	0.934948	0.597819	24.0101
INTERPRO	IPR001526:CD59 antigen	2	5.12821	0.0613218	LY6A, CD177	34	34	17763	30.7318	0.999216	0.832661	51.2531
INTERPRO	IPR011992:EF-Hand type	3	7.69231	0.0662775	PLCD3, SPNA1, S100A14	34	227	17763	6.90451	0.999569	0.787713	54.0967
PIR_SUPERFAMILY	PIRSF005691:mouse GTP-binding protein IRG-47	3	7.69231	0.000173569	IRGM2, IIGP1, TGTP2	25	7	8136	139.474	0.00450301	0.00450301	0.142251
PIR_SUPERFAMILY	PIRSF005552:guanine nucleotide-binding protein 1	2	5.12821	0.0233666	GBP3, GBP2	25	8	8136	81.36	0.459219	0.264622	17.6258
SP_PIR_KEYWORDS	Secreted	11	28.2051	0.000166011	NOV, RETNLB, EPHB6, CEACAM10, LAMA5, REG4, CAPG, PGLYRP1, EXPI, COL8A1, TGFB1	34	1420	17854	4.06781	0.0154851	0.0154851	0.181961
SP_PIR_KEYWORDS	signal	15	38.4615	0.000418643	RETNLB, CEACAM10, SELM, REG4, PGLYRP1, TGFB1, NOV, LY6A, EPHB6, LAMA5, ITGA5, CD177, EXPI, COL8A1, NT5E	34	2970	17854	2.65211	0.0385961	0.0194879	0.458289
SP_PIR_KEYWORDS	gpi-anchor	4	10.2564	0.00153219	LY6A, BST2, CD177, NT5E	34	124	17854	16.9393	0.13423	0.0469095	1.66802
SP_PIR_KEYWORDS	glycoprotein	14	35.8974	0.00872046	CEACAM10, BST2, REG4, GPRC5A, TGFB1, NOV, LY6A, EPHB6, LAMA5, ITGA5, CD177, TRPV6, FUT2, NT5E	34	3600	17854	2.04212	0.561027	0.186028	9.16105
SP_PIR_KEYWORDS	blocked carboxyl end	2	5.12821	0.0146942	LY6A, NT5E	34	8	17854	131.279	0.751298	0.24293	14.989
SP_PIR_KEYWORDS	lipoprotein	5	12.8205	0.0224878	LY6A, BST2, CD177, NT5E, GBP2	34	589	17854	4.4577	0.882108	0.299759	22.0814
SP_PIR_KEYWORDS	phosphatidylinositol linkage	2	5.12821	0.0237715	LY6A, NT5E	34	13	17854	80.7873	0.895806	0.276078	23.1965
SP_PIR_KEYWORDS	actin capping	2	5.12821	0.0291789	CAPG, SPNA1	34	16	17854	65.6397	0.938186	0.293868	27.7365
SP_PIR_KEYWORDS	cell membrane	8	20.5128	0.0342164	LY6A, EPHB6, BST2, CD177, TRPV6, GPRC5A, NT5E, GBP2	34	1713	17854	2.45239	0.962094	0.304851	31.7452
SP_PIR_KEYWORDS	calcium	5	12.8205	0.044531	ITGA5, PLCD3, SPNA1, TRPV6, S100A14	34	731	17854	3.59178	0.986185	0.348318	39.3294
SP_PIR_KEYWORDS	basement membrane	2	5.12821	0.0610185	LAMA5, COL8A1	34	34	17854	30.8893	0.99731	0.416095	49.8754
SP_PIR_KEYWORDS	disulfide bond	9	23.0769	0.0761451	LY6A, NOV, RETNLB, LAMA5, ITGA5, REG4, PGLYRP1, NT5E, TGFB1	34	2469	17854	1.91416	0.999416	0.462272	58.0553
SP_PIR_KEYWORDS	golgi apparatus	4	10.2564	0.0813121	SELM, BST2, IIGP1, FUT2	34	553	17854	3.79832	0.999655	0.458403	60.5582
SP_PIR_KEYWORDS	membrane protein	2	5.12821	0.0833816	SPNA1, NT5E	34	47	17854	22.3454	0.999721	0.442656	61.5219
SP_PIR_KEYWORDS	cytoplasm	10	25.641	0.0938214	SELM, GSDMC, CAPG, PLCD3, PGLYRP1, SPNA1, IIGP1, IFI44, GBP3, S100A14	34	3029	17854	1.73363	0.999905	0.460647	66.0656
UP_SEQ_FEATURE	signal peptide	15	38.4615	0.000589224	RETNLB, CEACAM10, SELM, REG4, PGLYRP1, TGFB1, NOV, LY6A, EPHB6, LAMA5, ITGA5, CD177, EXPI, COL8A1, NT5E	32	2963	16021	2.53454	0.103833	0.103833	0.727306
UP_SEQ_FEATURE	propeptide:Removed in mature form	5	12.8205	0.000813781	LY6A, BST2, CD177, NT5E, GBP2	32	220	16021	11.3786	0.140518	0.0729172	1.0032
UP_SEQ_FEATURE	glycosylation site:N-linked (GlcNAc...)	13	33.3333	0.0220306	CEACAM10, BST2, REG4, GPRC5A, TGFB1, NOV, EPHB6, LAMA5, ITGA5, CD177, TRPV6, FUT2, NT5E	32	3444	16021	1.88982	0.984133	0.748715	24.1109
UP_SEQ_FEATURE	domain:EF-hand 1	3	7.69231	0.0385804	PLCD3, SPNA1, S100A14	32	161	16021	9.329	0.999337	0.839508	38.5702
UP_SEQ_FEATURE	nucleotide phosphate-binding region:GTP	3	7.69231	0.0980595	IIGP1, GBP3, GBP2	32	274	16021	5.48164	1	0.978491	72.1463
UP_SEQ_FEATURE	binding site:Substrate	3	7.69231	0.0986624	CBR2, PLCD3, NT5E	32	275	16021	5.4617	1	0.96005	72.376

## Sheet: Cluster4
Table S4: Hierarchical clustering of genes differentially regulated in the presence or absence of microbiota; Cluster 4
Category	Term	Count	%	PValue	Genes	List Total	Pop Hits	Pop Total	Fold Enrichment	Bonferroni	Benjamini	FDR
GOTERM_BP_FAT	GO:0006955~immune response	6	3.01508	1.90373e-05	C3, ANG4, OASL2, TAP1, OAS3, MX2	12	471	13588	14.4246	0.00231988	0.00231988	0.0219167
GOTERM_BP_FAT	GO:0032020~ISG15-protein conjugation	2	1.00503	0.00323458	USP18, ISG15	12	4	13588	566.167	0.326494	0.179326	3.66151
GOTERM_BP_FAT	GO:0006952~defense response	4	2.01005	0.00482074	C3, ANG4, TAP1, MX2	12	448	13588	10.1101	0.445424	0.178413	5.41191
GOTERM_BP_FAT	GO:0006959~humoral immune response	2	1.00503	0.0428721	C3, ANG4	12	54	13588	41.9383	0.995232	0.737225	39.6198
GOTERM_BP_FAT	GO:0009615~response to virus	2	1.00503	0.0598542	ISG15, MX2	12	76	13588	29.7982	0.999463	0.778199	50.8664
GOTERM_BP_FAT	GO:0045087~innate immune response	2	1.00503	0.0833188	C3, MX2	12	107	13588	21.1651	0.999975	0.829481	63.2723
GOTERM_MF_FAT	GO:0017076~purine nucleotide binding	7	3.51759	0.0033325	GM12250, FMO1, OASL2, TAP1, OAS3, CAMK2B, MX2	13	1871	13288	3.8242	0.200405	0.200405	3.36568
GOTERM_MF_FAT	GO:0000166~nucleotide binding	7	3.51759	0.00734417	GM12250, FMO1, OASL2, TAP1, OAS3, CAMK2B, MX2	13	2183	13288	3.27763	0.389743	0.21881	7.28148
GOTERM_MF_FAT	GO:0032555~purine ribonucleotide binding	6	3.01508	0.015588	GM12250, OASL2, TAP1, OAS3, CAMK2B, MX2	13	1796	13288	3.41477	0.650979	0.295928	14.8823
GOTERM_MF_FAT	GO:0032553~ribonucleotide binding	6	3.01508	0.015588	GM12250, OASL2, TAP1, OAS3, CAMK2B, MX2	13	1796	13288	3.41477	0.650979	0.295928	14.8823
GOTERM_MF_FAT	GO:0030554~adenyl nucleotide binding	5	2.51256	0.0410189	FMO1, OASL2, TAP1, OAS3, CAMK2B	13	1535	13288	3.32949	0.939567	0.504187	34.9214
GOTERM_MF_FAT	GO:0001883~purine nucleoside binding	5	2.51256	0.0421459	FMO1, OASL2, TAP1, OAS3, CAMK2B	13	1548	13288	3.30153	0.944145	0.43842	35.7015
GOTERM_MF_FAT	GO:0001882~nucleoside binding	5	2.51256	0.0430254	FMO1, OASL2, TAP1, OAS3, CAMK2B	13	1558	13288	3.28034	0.94748	0.388042	36.3045
INTERPRO	IPR006117:2-5-oligoadenylate synthetase, conserved site	2	1.00503	0.00673701	OASL2, OAS3	16	8	17763	277.547	0.351198	0.351198	6.63681
INTERPRO	IPR018952:2'-5'-oligoadenylate synthetase 1, domain 2/C-terminal	2	1.00503	0.0109261	OASL2, OAS3	16	13	17763	170.798	0.504961	0.29641	10.5606
INTERPRO	IPR006116:2-5-oligoadenylate synthetase, ubiquitin-like region	2	1.00503	0.0117619	OASL2, OAS3	16	14	17763	158.598	0.531034	0.223073	11.3255
INTERPRO	IPR000626:Ubiquitin	2	1.00503	0.0389776	ISG15, OASL2	16	47	17763	47.242	0.921486	0.470658	33.2288
INTERPRO	IPR019955:Ubiquitin supergroup	2	1.00503	0.0414167	ISG15, OASL2	16	50	17763	44.4075	0.933272	0.418082	34.9306
SMART	SM00213:UBQ	2	1.00503	0.0404594	ISG15, OASL2	9	47	9131	43.1726	0.338342	0.338342	21.9638
SP_PIR_KEYWORDS	Antiviral defense	2	1.00503	0.039271	ISG15, MX2	15	51	17854	46.6771	0.954263	0.954263	34.4716

## Sheet: Cluster5
Table S4: Hierarchical clustering of genes differentially regulated in the presence or absence of microbiota; Cluster 5
Category	Term	Count	%	PValue	Genes	List Total	Pop Hits	Pop Total	Fold Enrichment	Bonferroni	Benjamini	FDR
GOTERM_BP_FAT	GO:0007169~transmembrane receptor protein tyrosine kinase signaling pathway	3	25	0.00669851	SORBS1, VEGFA, CLEC2I	10	192	13588	21.2312	0.821039	0.821039	8.3908
GOTERM_BP_FAT	GO:0007167~enzyme linked receptor protein signaling pathway	3	25	0.0131904	SORBS1, VEGFA, CLEC2I	10	273	13588	14.9319	0.9666	0.817245	15.898
GOTERM_BP_FAT	GO:0006952~defense response	3	25	0.0334889	DEFA24, DEFA-RS7, DEFA3, GM7849, GM15284, DEFA17, DEFA-RS1	10	448	13588	9.09911	0.999837	0.945343	35.8634
GOTERM_BP_FAT	GO:0042742~defense response to bacterium	2	16.6667	0.0693209	DEFA24, DEFA-RS7, DEFA3, GM15284, DEFA17	10	108	13588	25.163	1	0.989926	60.8105
GOTERM_BP_FAT	GO:0009617~response to bacterium	2	16.6667	0.099338	DEFA24, DEFA-RS7, DEFA3, GM15284, DEFA17	10	157	13588	17.3096	1	0.995284	74.4428
GOTERM_CC_FAT	GO:0044421~extracellular region part	5	41.6667	0.00142796	DEFA24, DEFA-RS7, VEGFA, DEFA3, GM7849, GM15284, DEFA17, ABI3BP, DEFA-RS1	10	774	12504	8.07752	0.0676247	0.0676247	1.36076
GOTERM_CC_FAT	GO:0005615~extracellular space	4	33.3333	0.00473929	DEFA24, DEFA-RS7, VEGFA, DEFA3, GM7849, GM15284, DEFA17, DEFA-RS1	10	511	12504	9.78787	0.20767	0.109871	4.45264
GOTERM_CC_FAT	GO:0005576~extracellular region	5	41.6667	0.023352	DEFA24, DEFA-RS7, VEGFA, DEFA3, GM7849, GM15284, DEFA17, ABI3BP, DEFA-RS1	10	1680	12504	3.72143	0.68583	0.320189	20.2724
GOTERM_MF_FAT	GO:0030246~carbohydrate binding	3	25	0.00798648	VEGFA, ABI3BP, CLEC2I	7	317	13288	17.9648	0.220089	0.220089	6.6567
GOTERM_MF_FAT	GO:0008201~heparin binding	2	16.6667	0.0369039	VEGFA, ABI3BP	7	83	13288	45.7418	0.688284	0.441685	27.605
GOTERM_MF_FAT	GO:0005539~glycosaminoglycan binding	2	16.6667	0.0503928	VEGFA, ABI3BP	7	114	13288	33.3033	0.798691	0.413923	35.8667
GOTERM_MF_FAT	GO:0030247~polysaccharide binding	2	16.6667	0.0564328	VEGFA, ABI3BP	7	128	13288	29.6607	0.83482	0.362486	39.2876
GOTERM_MF_FAT	GO:0001871~pattern binding	2	16.6667	0.0564328	VEGFA, ABI3BP	7	128	13288	29.6607	0.83482	0.362486	39.2876
GOTERM_MF_FAT	GO:0042803~protein homodimerization activity	2	16.6667	0.0840578	DEFA24, DEFA-RS7, VEGFA, DEFA3, DEFA17	7	193	13288	19.6714	0.934248	0.419794	52.9657
INTERPRO	IPR002366:Defensin propeptide	3	25	2.38798e-05	DEFA24, DEFA-RS7, DEFA3, GM7849, GM15284, DEFA17, DEFA-RS1	10	15	17763	355.26	0.000525223	0.000525223	0.0186876
INTERPRO	IPR016327:Alpha-defensin	3	25	2.38798e-05	DEFA24, DEFA-RS7, DEFA3, GM7849, GM15284, DEFA17, DEFA-RS1	10	15	17763	355.26	0.000525223	0.000525223	0.0186876
INTERPRO	IPR006081:Alpha defensin	2	16.6667	0.00253107	DEFA24, DEFA-RS7, DEFA3, GM15284, DEFA17	10	5	17763	710.52	0.0542285	0.0274921	1.96388
INTERPRO	IPR006080:Mammalian defensin	2	16.6667	0.00606501	DEFA24, DEFA-RS7, DEFA3, GM15284, DEFA17	10	12	17763	296.05	0.125267	0.0436317	4.64957
PIR_SUPERFAMILY	PIRSF001875:alpha-defensin	3	25	3.16273e-05	DEFA24, DEFA-RS7, DEFA3, GM7849, GM15284, DEFA17, DEFA-RS1	6	15	8136	271.2	0.000126503	0.000126503	0.012075
SMART	SM00048:DEFSN	2	16.6667	0.00916624	DEFA24, DEFA-RS7, DEFA3, GM15284, DEFA17	8	12	9131	190.229	0.062426	0.062426	4.63638
SP_PIR_KEYWORDS	defensin	3	25	0.000221555	DEFA24, DEFA-RS7, DEFA3, GM7849, GM15284, DEFA17, DEFA-RS1	9	51	17854	116.693	0.0105794	0.0105794	0.211243
SP_PIR_KEYWORDS	Antimicrobial	3	25	0.000394338	DEFA24, DEFA-RS7, DEFA3, GM7849, GM15284, DEFA17, DEFA-RS1	9	68	17854	87.5196	0.0187539	0.00942132	0.375706
SP_PIR_KEYWORDS	Secreted	4	33.3333	0.0207434	DEFA24, DEFA-RS7, VEGFA, DEFA3, GM7849, GM15284, DEFA17, DEFA-RS1	9	1420	17854	5.58811	0.634378	0.284937	18.1309
SP_PIR_KEYWORDS	antibiotic	2	16.6667	0.0252618	DEFA24, DEFA-RS7, DEFA3, GM15284, DEFA17	9	57	17854	69.6062	0.707165	0.264376	21.6658
SP_PIR_KEYWORDS	disulfide bond	4	33.3333	0.0864002	DEFA24, DEFA-RS7, VEGFA, DEFA3, GM15284, DEFA17, CLEC2I	9	2469	17854	3.2139	0.98693	0.579992	57.7845
SP_PIR_KEYWORDS	sh3 domain	2	16.6667	0.0878515	SORBS1, ABI3	9	204	17854	19.4488	0.98789	0.520792	58.4202

## Sheet: Cluster6
Table S4: Hierarchical clustering of genes differentially regulated in the presence or absence of microbiota; Cluster 6
Category	Term	Count	%	PValue	Genes	List Total	Pop Hits	Pop Total	Fold Enrichment	Bonferroni	Benjamini	FDR
GOTERM_BP_FAT	GO:0048729~tissue morphogenesis	6	6.31579	0.00955696	FGFR3, LY6E, CD44, CTNND1, TGIF1, TPM1	75	238	13588	4.56739	0.999483	0.999483	13.6803
GOTERM_BP_FAT	GO:0006397~mRNA processing	6	6.31579	0.014036	APP, GM5643, TARDBP, HNRNPF, CELF2, HNRNPC	75	262	13588	4.14901	0.999985	0.996187	19.4707
GOTERM_BP_FAT	GO:0045597~positive regulation of cell differentiation	5	5.26316	0.0152086	FGFR3, BTG1, TGIF1, GNAS, ACIN1	75	175	13588	5.17638	0.999994	0.982145	20.9254
GOTERM_BP_FAT	GO:0060429~epithelium development	6	6.31579	0.0160286	FGFR3, CD44, PSAP, SPRR2B, CTNND1, TGIF1	75	271	13588	4.01122	0.999997	0.958548	21.9281
GOTERM_BP_FAT	GO:0006417~regulation of translation	4	4.21053	0.0171977	APP, PUM1, EIF5A, PUM2	75	100	13588	7.24693	0.999999	0.935037	23.3372
GOTERM_BP_FAT	GO:0040007~growth	5	5.26316	0.020991	APP, LY6E, PSAP, AKP3, DCLK1	75	193	13588	4.69361	1	0.938343	27.747
GOTERM_BP_FAT	GO:0030182~neuron differentiation	7	7.36842	0.0213974	APP, FGFR3, ANK3, PTPRR, WHRN, DCLK1, NTN3	75	399	13588	3.17848	1	0.912392	28.2051
GOTERM_BP_FAT	GO:0008380~RNA splicing	5	5.26316	0.0239411	GM5643, TARDBP, HNRNPF, CELF2, HNRNPC	75	201	13588	4.5068	1	0.908084	31.0113
GOTERM_BP_FAT	GO:0016071~mRNA metabolic process	6	6.31579	0.0243169	APP, GM5643, TARDBP, HNRNPF, CELF2, HNRNPC	75	302	13588	3.59947	1	0.884143	31.4172
GOTERM_BP_FAT	GO:0043009~chordate embryonic development	7	7.36842	0.0269634	LY6E, PTPRR, TGIF1, GNAS, AKP3, TPM1, TCF7L2	75	421	13588	3.01238	1	0.883968	34.2124
GOTERM_BP_FAT	GO:0009792~embryonic development ending in birth or egg hatching	7	7.36842	0.02807	LY6E, PTPRR, TGIF1, GNAS, AKP3, TPM1, TCF7L2	75	425	13588	2.98403	1	0.869919	35.3493
GOTERM_BP_FAT	GO:0050808~synapse organization	3	3.15789	0.0291807	APP, ANK3, CACNA2D2	75	49	13588	11.0922	1	0.856972	36.4719
GOTERM_BP_FAT	GO:0051094~positive regulation of developmental process	5	5.26316	0.0292494	FGFR3, BTG1, TGIF1, GNAS, ACIN1	75	214	13588	4.23302	1	0.834603	36.5407
GOTERM_BP_FAT	GO:0014706~striated muscle tissue development	4	4.21053	0.0319712	APP, LY6E, CACNA2D2, TPM1	75	127	13588	5.70625	1	0.839412	39.2124
GOTERM_BP_FAT	GO:0060537~muscle tissue development	4	4.21053	0.0379961	APP, LY6E, CACNA2D2, TPM1	75	136	13588	5.32863	1	0.869316	44.7571
GOTERM_BP_FAT	GO:0010608~posttranscriptional regulation of gene expression	4	4.21053	0.0468666	APP, PUM1, EIF5A, PUM2	75	148	13588	4.89658	1	0.905959	52.066
GOTERM_BP_FAT	GO:0006357~regulation of transcription from RNA polymerase II promoter	8	8.42105	0.0499614	ABLIM2, APP, HTATIP2, PKIG, TGIF1, BCOR, TCF7L2, TCF3	75	616	13588	2.3529	1	0.907051	54.3957
GOTERM_BP_FAT	GO:0010604~positive regulation of macromolecule metabolic process	8	8.42105	0.0562916	ABLIM2, APP, FGFR3, HTATIP2, EIF5A, TCF7L2, HMGA1, TCF3	75	633	13588	2.28971	1	0.920849	58.8351
GOTERM_BP_FAT	GO:0019941~modification-dependent protein catabolic process	7	7.36842	0.05811	CUEDC2, USP19, USPL1, GM5801, FBXO6, SENP8, GM2058, UBE2H	75	508	13588	2.49648	1	0.916499	60.0337
GOTERM_BP_FAT	GO:0043632~modification-dependent macromolecule catabolic process	7	7.36842	0.05811	CUEDC2, USP19, USPL1, GM5801, FBXO6, SENP8, GM2058, UBE2H	75	508	13588	2.49648	1	0.916499	60.0337
GOTERM_BP_FAT	GO:0007409~axonogenesis	4	4.21053	0.0592594	APP, ANK3, DCLK1, NTN3	75	163	13588	4.44597	1	0.909903	60.7744
GOTERM_BP_FAT	GO:0015931~nucleobase, nucleoside, nucleotide and nucleic acid transport	3	3.15789	0.0614744	SLC29A1, GM5643, EIF5A	75	74	13588	7.34486	1	0.907515	62.1656
GOTERM_BP_FAT	GO:0048588~developmental cell growth	2	2.10526	0.0634543	APP, DCLK1	75	12	13588	30.1956	1	0.904453	63.3701
GOTERM_BP_FAT	GO:0032268~regulation of cellular protein metabolic process	5	5.26316	0.0663022	APP, FGFR3, PUM1, EIF5A, PUM2	75	280	13588	3.23524	1	0.904667	65.0397
GOTERM_BP_FAT	GO:0002009~morphogenesis of an epithelium	4	4.21053	0.0682944	FGFR3, CD44, CTNND1, TGIF1	75	173	13588	4.18898	1	0.90198	66.1652
GOTERM_BP_FAT	GO:0010557~positive regulation of macromolecule biosynthetic process	7	7.36842	0.0684418	ABLIM2, APP, HTATIP2, EIF5A, TCF7L2, HMGA1, TCF3	75	530	13588	2.39286	1	0.892972	66.2471
GOTERM_BP_FAT	GO:0002763~positive regulation of myeloid leukocyte differentiation	2	2.10526	0.0685593	GNAS, ACIN1	75	13	13588	27.8728	1	0.883811	66.3123
GOTERM_BP_FAT	GO:0051603~proteolysis involved in cellular protein catabolic process	7	7.36842	0.0704294	CUEDC2, USP19, USPL1, GM5801, FBXO6, SENP8, GM2058, UBE2H	75	534	13588	2.37493	1	0.881337	67.3337
GOTERM_BP_FAT	GO:0007517~muscle organ development	4	4.21053	0.0711212	APP, LY6E, CACNA2D2, TPM1	75	176	13588	4.11758	1	0.874606	67.7041
GOTERM_BP_FAT	GO:0048812~neuron projection morphogenesis	4	4.21053	0.0711212	APP, ANK3, DCLK1, NTN3	75	176	13588	4.11758	1	0.874606	67.7041
GOTERM_BP_FAT	GO:0044257~cellular protein catabolic process	7	7.36842	0.071942	CUEDC2, USP19, USPL1, GM5801, FBXO6, SENP8, GM2058, UBE2H	75	537	13588	2.36166	1	0.868497	68.1386
GOTERM_BP_FAT	GO:0048666~neuron development	5	5.26316	0.0748415	APP, ANK3, WHRN, DCLK1, NTN3	75	292	13588	3.10228	1	0.870398	69.6299
GOTERM_BP_FAT	GO:0021915~neural tube development	3	3.15789	0.0750971	TGIF1, AKP3, TCF7L2	75	83	13588	6.54843	1	0.862537	69.7582
GOTERM_BP_FAT	GO:0048667~cell morphogenesis involved in neuron differentiation	4	4.21053	0.076931	APP, ANK3, DCLK1, NTN3	75	182	13588	3.98183	1	0.860719	70.6639
GOTERM_BP_FAT	GO:0055010~ventricular cardiac muscle morphogenesis	2	2.10526	0.0786869	LY6E, TPM1	75	15	13588	24.1564	1	0.858717	71.5072
GOTERM_BP_FAT	GO:0031328~positive regulation of cellular biosynthetic process	7	7.36842	0.079788	ABLIM2, APP, HTATIP2, EIF5A, TCF7L2, HMGA1, TCF3	75	552	13588	2.29749	1	0.854438	72.0245
GOTERM_BP_FAT	GO:0030163~protein catabolic process	7	7.36842	0.0819596	CUEDC2, USP19, USPL1, GM5801, FBXO6, SENP8, GM2058, UBE2H	75	556	13588	2.28096	1	0.854166	73.0189
GOTERM_BP_FAT	GO:0009891~positive regulation of biosynthetic process	7	7.36842	0.0825077	ABLIM2, APP, HTATIP2, EIF5A, TCF7L2, HMGA1, TCF3	75	557	13588	2.27686	1	0.848152	73.2647
GOTERM_BP_FAT	GO:0051146~striated muscle cell differentiation	3	3.15789	0.0846631	APP, CACNA2D2, NTN3	75	89	13588	6.10697	1	0.848023	74.2108
GOTERM_BP_FAT	GO:0006396~RNA processing	6	6.31579	0.0895154	APP, GM5643, TARDBP, HNRNPF, CELF2, HNRNPC	75	437	13588	2.48751	1	0.856965	76.2275
GOTERM_BP_FAT	GO:0043087~regulation of GTPase activity	3	3.15789	0.0912358	ARFGAP1, TBC1D24, ARHGAP1	75	93	13588	5.8443	1	0.855289	76.9064
GOTERM_BP_FAT	GO:0048732~gland development	4	4.21053	0.0923328	LY6E, CD44, PSAP, CTNND1	75	197	13588	3.67865	1	0.851695	77.3298
GOTERM_BP_FAT	GO:0060415~muscle tissue morphogenesis	2	2.10526	0.093675	LY6E, TPM1	75	18	13588	20.1304	1	0.848985	77.838
GOTERM_BP_FAT	GO:0055008~cardiac muscle tissue morphogenesis	2	2.10526	0.093675	LY6E, TPM1	75	18	13588	20.1304	1	0.848985	77.838
GOTERM_BP_FAT	GO:0030030~cell projection organization	5	5.26316	0.0959828	APP, ANK3, WHRN, DCLK1, NTN3	75	319	13588	2.83971	1	0.849412	78.6869
GOTERM_BP_FAT	GO:0048858~cell projection morphogenesis	4	4.21053	0.0977325	APP, ANK3, DCLK1, NTN3	75	202	13588	3.58759	1	0.848123	79.3102
GOTERM_CC_FAT	GO:0000267~cell fraction	11	11.5789	0.000425762	APP, ANK3, CYP2C29, PKIG, WNK1, CTNND1, CELF2, GNAS, ARHGAP17, PCDHA1, PLEC	60	596	12504	3.84631	0.058278	0.058278	0.501827
GOTERM_CC_FAT	GO:0042995~cell projection	10	10.5263	0.00138692	RTN4, APP, GTF2I, ANK3, PXMP3, ARHGAP1, DYNLT1E, CTNND1, GNAS, DYNLT1F, WHRN	60	575	12504	3.62435	0.177735	0.0932115	1.62625
GOTERM_CC_FAT	GO:0005626~insoluble fraction	9	9.47368	0.00318717	APP, ANK3, CYP2C29, WNK1, CTNND1, GNAS, ARHGAP17, PCDHA1, PLEC	60	528	12504	3.55227	0.362442	0.139323	3.70103
GOTERM_CC_FAT	GO:0043292~contractile fiber	4	4.21053	0.0101592	ABLIM2, PDLIM5, TPM1, PLEC	60	95	12504	8.77474	0.763018	0.302284	11.364
GOTERM_CC_FAT	GO:0005624~membrane fraction	7	7.36842	0.0324662	APP, ANK3, CYP2C29, WNK1, CTNND1, GNAS, PCDHA1	60	510	12504	2.86039	0.990474	0.605738	32.2883
GOTERM_CC_FAT	GO:0043232~intracellular non-membrane-bounded organelle	15	15.7895	0.0595608	ABLIM2, MRPS28, EPPK1, TPX2, WHRN, HMGA1, TPM1, APP, SPRR2B, DYNLT1E, ACIN1, DYNLT1F, TCF3, DYNC1I2, OXR1, PLEC	60	1919	12504	1.62897	0.999826	0.763804	51.5899
GOTERM_CC_FAT	GO:0043228~non-membrane-bounded organelle	15	15.7895	0.0595608	ABLIM2, MRPS28, EPPK1, TPX2, WHRN, HMGA1, TPM1, APP, SPRR2B, DYNLT1E, ACIN1, DYNLT1F, TCF3, DYNC1I2, OXR1, PLEC	60	1919	12504	1.62897	0.999826	0.763804	51.5899
GOTERM_CC_FAT	GO:0048471~perinuclear region of cytoplasm	4	4.21053	0.0597016	SPAG9, APP, FGFR3, TPD52	60	189	12504	4.41058	0.99983	0.710602	51.6754
GOTERM_CC_FAT	GO:0030016~myofibril	3	3.15789	0.0686314	ABLIM2, PDLIM5, TPM1	60	91	12504	6.87033	0.999956	0.714394	56.8272
GOTERM_CC_FAT	GO:0005856~cytoskeleton	10	10.5263	0.0787142	ABLIM2, APP, EPPK1, SPRR2B, DYNLT1E, TPX2, DYNLT1F, WHRN, TPM1, DYNC1I2, PLEC	60	1122	12504	1.8574	0.99999	0.723192	62.0366
GOTERM_CC_FAT	GO:0005625~soluble fraction	3	3.15789	0.079406	PKIG, WNK1, CELF2	60	99	12504	6.31515	0.999991	0.68857	62.372
GOTERM_CC_FAT	GO:0031252~cell leading edge	3	3.15789	0.0979367	ARHGAP1, CTNND1, GNAS	60	112	12504	5.58214	1	0.733179	70.4075
GOTERM_MF_FAT	GO:0019901~protein kinase binding	5	5.26316	0.000555085	SPAG9, GTF2I, TPX2, PTPRR, TGIF1	72	71	13288	12.9969	0.0930991	0.0930991	0.679032
GOTERM_MF_FAT	GO:0019900~kinase binding	5	5.26316	0.0010936	SPAG9, GTF2I, TPX2, PTPRR, TGIF1	72	85	13288	10.8562	0.175171	0.0917988	1.33374
GOTERM_MF_FAT	GO:0019899~enzyme binding	7	7.36842	0.00138127	SPAG9, GTF2I, BTG1, TPX2, PTPRR, CTNND1, TGIF1	72	229	13288	5.64144	0.215942	0.0778899	1.68186
GOTERM_MF_FAT	GO:0005096~GTPase activator activity	6	6.31579	0.00360035	ARFGAP1, TBC1D24, ARHGEF1, SIPA1, ARHGAP1, ARHGAP17	72	192	13288	5.76736	0.469961	0.146749	4.32952
GOTERM_MF_FAT	GO:0008047~enzyme activator activity	6	6.31579	0.0105903	ARFGAP1, TBC1D24, ARHGEF1, SIPA1, ARHGAP1, ARHGAP17	72	249	13288	4.44712	0.846467	0.312551	12.2475
GOTERM_MF_FAT	GO:0008432~JUN kinase binding	2	2.10526	0.0106582	SPAG9, TGIF1	72	2	13288	184.556	0.848309	0.269713	12.3213
GOTERM_MF_FAT	GO:0030695~GTPase regulator activity	7	7.36842	0.0125439	ARFGAP1, TBC1D24, RALGPS2, ARHGEF1, SIPA1, ARHGAP1, ARHGAP17	72	361	13288	3.57864	0.891575	0.271949	14.3502
GOTERM_MF_FAT	GO:0060589~nucleoside-triphosphatase regulator activity	7	7.36842	0.0135173	ARFGAP1, TBC1D24, RALGPS2, ARHGEF1, SIPA1, ARHGAP1, ARHGAP17	72	367	13288	3.52013	0.908852	0.258743	15.3805
GOTERM_MF_FAT	GO:0003723~RNA binding	8	8.42105	0.0668441	GM5643, TARDBP, HNRNPF, PUM1, EIF5A, CELF2, HNRNPC, PUM2	72	672	13288	2.19709	0.999995	0.741514	57.2141
INTERPRO	IPR000504:RNA recognition motif, RNP-1	6	6.31579	0.00349788	GM5643, TARDBP, HNRNPF, CELF2, HNRNPC, ACIN1	86	212	17763	5.84566	0.527567	0.527567	4.34339
INTERPRO	IPR012677:Nucleotide-binding, alpha-beta plait	6	6.31579	0.00356871	GM5643, TARDBP, HNRNPF, CELF2, HNRNPC, ACIN1	86	213	17763	5.81821	0.534699	0.31787	4.42952
INTERPRO	IPR016659:Transcription factor II-I	2	2.10526	0.00954783	GTF2I, GTF2IRD1	86	2	17763	206.547	0.871657	0.495582	11.4478
INTERPRO	IPR004212:GTF2I-like repeat	2	2.10526	0.0142879	GTF2I, GTF2IRD1	86	3	17763	137.698	0.954025	0.536948	16.6709
INTERPRO	IPR006571:TLDc	2	2.10526	0.0190056	TBC1D24, OXR1	86	4	17763	103.273	0.983532	0.560126	21.5862
INTERPRO	IPR001313:Pumilio RNA-binding region	2	2.10526	0.0190056	PUM1, PUM2	86	4	17763	103.273	0.983532	0.560126	21.5862
INTERPRO	IPR011989:Armadillo-like helical	4	4.21053	0.024487	PUM1, CTNND1, PUM2, ARMCX1	86	130	17763	6.35528	0.995036	0.586972	26.9612
INTERPRO	IPR001101:Plectin repeat	2	2.10526	0.033025	EPPK1, PLEC	86	7	17763	59.0133	0.999243	0.641802	34.6612
KEGG_PATHWAY	mmu05414:Dilated cardiomyopathy	3	3.15789	0.0780861	GNAS, CACNA2D2, TPM1	30	92	5738	6.23696	0.974233	0.974233	53.4482
PIR_SUPERFAMILY	PIRSF016441:TF_II-I	2	2.10526	0.00956463	GTF2I, GTF2IRD1	40	2	8136	203.4	0.381546	0.381546	8.84094
SMART	SM00360:RRM	6	6.31579	0.0124924	GM5643, TARDBP, HNRNPF, CELF2, HNRNPC, ACIN1	61	212	9131	4.23647	0.563815	0.563815	12.0614
SMART	SM00584:TLDc	2	2.10526	0.0260304	TBC1D24, OXR1	61	4	9131	74.8443	0.824613	0.581208	23.6369
SMART	SM00025:Pumilio	2	2.10526	0.0260304	PUM1, PUM2	61	4	9131	74.8443	0.824613	0.581208	23.6369
SMART	SM00250:PLEC	2	2.10526	0.0451148	EPPK1, PLEC	61	7	9131	42.7681	0.952491	0.637819	37.6247
SP_PIR_KEYWORDS	alternative splicing	54	56.8421	7.74178e-13	RTN4, USPL1, HTATIP2, PDLIM5, ARHGAP17, PCDHA1, TPD52, USP19, APP, CD44, ANK3, PXMP3, PUM1, SMOX, PUM2, ACIN1, RTEL1, OXR1, SGK1, GM5643, ARHGEF1, PTPRR, WNK1, HMGA1, SPAG9, GTF2I, GTF2IRD1, TGIF1, CELF2, GNAS, NFE2L1, ARFGAP1, ABLIM2, RALGPS2, FGFR3, CTNND1, TPM1, TCF7L2, SLC29A1, HNRNPF, UBAP2L, HNRNPC, BCOR, TCF3, DCLK1, PLEC, PSAP, CASC4, WHRN, CACNA2D2, TBC1D24, RNF44, SEMA6D, COL20A1	87	4481	17854	2.47306	1.37026e-10	1.37026e-10	9.50895e-10
SP_PIR_KEYWORDS	phosphoprotein	54	56.8421	5.91356e-07	RTN4, HTATIP2, PDLIM5, MORF4L2, EIF5A, ARHGAP17, TPD52, USP19, APP, CD44, PXMP3, TARDBP, ARHGAP1, PUM1, PUM2, ASPH, ACIN1, OXR1, SGK1, GM5643, ARHGEF1, PTPRR, WNK1, HMGA1, SPAG9, GTF2I, GTF2IRD1, GNAS, NFE2L1, DYNC1I2, ARFGAP1, ABLIM2, RALGPS2, FGFR3, SIPA1, CTNND1, GNG12, TPM1, RABGGTB, SLC29A1, HNRNPF, FBXO6, UBAP2L, HNRNPC, BCOR, AKP3, TCF3, DCLK1, PLEC, EPPK1, CASC4, ZFP775, SEMA6D, REPIN1	87	6311	17854	1.75595	0.000104665	5.23337e-05	0.000726355
SP_PIR_KEYWORDS	acetylation	26	27.3684	6.62481e-05	RTN4, ARFGAP1, PDLIM5, SENP8, EIF5A, ARHGAP17, GNG12, TPM1, HNRNPF, ARHGAP1, UBAP2L, HNRNPC, PUM2, BCOR, PLEC, MRPS28, GM5643, CYP2C29, UBE2H, HMGA1, TBC1D24, SPAG9, GTF2I, DYNLT1E, CELF2, GM2058, DYNLT1F, REPIN1	87	2325	17854	2.29492	0.0116578	0.00390114	0.0813415
SP_PIR_KEYWORDS	GTPase activation	6	6.31579	0.000506093	ARFGAP1, TBC1D24, ARHGEF1, SIPA1, ARHGAP1, ARHGAP17	87	136	17854	9.05375	0.0857042	0.0221513	0.619857
SP_PIR_KEYWORDS	ubl conjugation	10	10.5263	0.000933809	SGK1, GM5643, GTF2I, TARDBP, HNRNPF, GNAS, HNRNPC, ACIN1, TPM1, TCF7L2	87	524	17854	3.91638	0.152413	0.0325314	1.14097
SP_PIR_KEYWORDS	cytoplasm	27	28.4211	0.00166513	CUEDC2, ARFGAP1, ABLIM2, RALGPS2, HTATIP2, CTNND1, EIF5A, ARHGAP17, TPM1, PXMP3, ARHGAP1, SPRR2B, FBXO6, PUM1, SMOX, PUM2, PLEC, SGK1, GM5643, ARHGEF1, EPPK1, WNK1, PTPRR, WHRN, SPAG9, GTF2I, CELF2	87	3029	17854	1.82928	0.255449	0.0479734	2.02616
SP_PIR_KEYWORDS	isopeptide bond	7	7.36842	0.00220142	GM5643, HNRNPF, GNAS, HNRNPC, ACIN1, TPM1, TCF7L2	87	277	17854	5.18602	0.322998	0.0542015	2.67065
SP_PIR_KEYWORDS	rna-binding	8	8.42105	0.0088798	GM5643, TARDBP, HNRNPF, PUM1, EIF5A, CELF2, HNRNPC, PUM2	87	485	17854	3.38505	0.793766	0.179091	10.3769
SP_PIR_KEYWORDS	mrna processing	5	5.26316	0.0287176	GM5643, TARDBP, HNRNPF, CELF2, HNRNPC	87	240	17854	4.27538	0.994244	0.436195	30.0856
SP_PIR_KEYWORDS	nucleus	26	27.3684	0.0558149	CUEDC2, HTATIP2, MORF4L2, SIPA1, EIF5A, CTNND1, TCF7L2, TARDBP, HNRNPF, SMOX, HNRNPC, ACIN1, BCOR, TCF3, RTEL1, OXR1, SGK1, GM5643, ZFP775, HMGA1, GTF2I, GTF2IRD1, CELF2, TGIF1, NFE2L1, REPIN1	87	3808	17854	1.40118	0.999962	0.638165	50.6111
SP_PIR_KEYWORDS	protein kinase inhibitor	2	2.10526	0.0563121	PKIG, WNK1	87	12	17854	34.2031	0.999965	0.606481	50.9296
SP_PIR_KEYWORDS	mrna splicing	4	4.21053	0.0647685	GM5643, TARDBP, HNRNPF, HNRNPC	87	191	17854	4.29777	0.999993	0.627559	56.0658
SP_PIR_KEYWORDS	iron	5	5.26316	0.0693767	CYP2C66, APP, CYP2C29, ASPH, RTEL1	87	321	17854	3.19655	0.999997	0.624296	58.6521
SP_PIR_KEYWORDS	ubl conjugation pathway	6	6.31579	0.084219	CUEDC2, USP19, GM5801, FBXO6, SENP8, GM2058, UBE2H	87	484	17854	2.54403	1	0.671196	66.0617
UP_SEQ_FEATURE	splice variant	51	53.6842	5.75934e-10	RTN4, USPL1, HTATIP2, PDLIM5, ARHGAP17, PCDHA1, TPD52, USP19, APP, CD44, PXMP3, PUM1, SMOX, PUM2, ACIN1, RTEL1, OXR1, SGK1, GM5643, ARHGEF1, PTPRR, HMGA1, SPAG9, GTF2I, GTF2IRD1, TGIF1, CELF2, GNAS, NFE2L1, ARFGAP1, ABLIM2, RALGPS2, FGFR3, CTNND1, TPM1, TCF7L2, SLC29A1, HNRNPF, UBAP2L, HNRNPC, BCOR, TCF3, DCLK1, PLEC, CASC4, WHRN, CACNA2D2, TBC1D24, RNF44, SEMA6D, COL20A1	84	4448	16021	2.18683	2.6493e-07	2.6493e-07	8.19641e-07
UP_SEQ_FEATURE	short sequence motif:Nuclear localization signal	8	8.42105	0.000744824	SGK1, GTF2I, GTF2IRD1, CTNND1, NFE2L1, HNRNPC, TCF7L2, RTEL1	84	289	16021	5.27962	0.290182	0.157493	1.05479
UP_SEQ_FEATURE	repeat:Plectin 12	2	2.10526	0.0103349	EPPK1, PLEC	84	2	16021	190.726	0.991594	0.796671	13.7436
UP_SEQ_FEATURE	repeat:GTF2I-like 3	2	2.10526	0.0103349	GTF2I, GTF2IRD1	84	2	16021	190.726	0.991594	0.796671	13.7436
UP_SEQ_FEATURE	repeat:Pumilio 8	2	2.10526	0.0103349	PUM1, PUM2	84	2	16021	190.726	0.991594	0.796671	13.7436
UP_SEQ_FEATURE	repeat:Plectin 16	2	2.10526	0.0103349	EPPK1, PLEC	84	2	16021	190.726	0.991594	0.796671	13.7436
UP_SEQ_FEATURE	repeat:Plectin 29	2	2.10526	0.0103349	EPPK1, PLEC	84	2	16021	190.726	0.991594	0.796671	13.7436
UP_SEQ_FEATURE	repeat:Plectin 23	2	2.10526	0.0103349	EPPK1, PLEC	84	2	16021	190.726	0.991594	0.796671	13.7436
UP_SEQ_FEATURE	repeat:Plectin 30	2	2.10526	0.0103349	EPPK1, PLEC	84	2	16021	190.726	0.991594	0.796671	13.7436
UP_SEQ_FEATURE	repeat:Plectin 26	2	2.10526	0.0103349	EPPK1, PLEC	84	2	16021	190.726	0.991594	0.796671	13.7436
UP_SEQ_FEATURE	repeat:Plectin 27	2	2.10526	0.0103349	EPPK1, PLEC	84	2	16021	190.726	0.991594	0.796671	13.7436
UP_SEQ_FEATURE	repeat:Plectin 20	2	2.10526	0.0103349	EPPK1, PLEC	84	2	16021	190.726	0.991594	0.796671	13.7436
UP_SEQ_FEATURE	repeat:Plectin 31	2	2.10526	0.0103349	EPPK1, PLEC	84	2	16021	190.726	0.991594	0.796671	13.7436
UP_SEQ_FEATURE	repeat:Pumilio 7	2	2.10526	0.0103349	PUM1, PUM2	84	2	16021	190.726	0.991594	0.796671	13.7436
UP_SEQ_FEATURE	repeat:Plectin 28	2	2.10526	0.0103349	EPPK1, PLEC	84	2	16021	190.726	0.991594	0.796671	13.7436
UP_SEQ_FEATURE	repeat:GTF2I-like 6	2	2.10526	0.0103349	GTF2I, GTF2IRD1	84	2	16021	190.726	0.991594	0.796671	13.7436
UP_SEQ_FEATURE	repeat:Plectin 18	2	2.10526	0.0103349	EPPK1, PLEC	84	2	16021	190.726	0.991594	0.796671	13.7436
UP_SEQ_FEATURE	repeat:Plectin 19	2	2.10526	0.0103349	EPPK1, PLEC	84	2	16021	190.726	0.991594	0.796671	13.7436
UP_SEQ_FEATURE	repeat:Plectin 24	2	2.10526	0.0103349	EPPK1, PLEC	84	2	16021	190.726	0.991594	0.796671	13.7436
UP_SEQ_FEATURE	repeat:Plectin 25	2	2.10526	0.0103349	EPPK1, PLEC	84	2	16021	190.726	0.991594	0.796671	13.7436
UP_SEQ_FEATURE	repeat:Plectin 21	2	2.10526	0.0103349	EPPK1, PLEC	84	2	16021	190.726	0.991594	0.796671	13.7436
UP_SEQ_FEATURE	repeat:GTF2I-like 4	2	2.10526	0.0103349	GTF2I, GTF2IRD1	84	2	16021	190.726	0.991594	0.796671	13.7436
UP_SEQ_FEATURE	repeat:Plectin 22	2	2.10526	0.0103349	EPPK1, PLEC	84	2	16021	190.726	0.991594	0.796671	13.7436
UP_SEQ_FEATURE	repeat:GTF2I-like 5	2	2.10526	0.0103349	GTF2I, GTF2IRD1	84	2	16021	190.726	0.991594	0.796671	13.7436
UP_SEQ_FEATURE	repeat:Plectin 13	2	2.10526	0.0103349	EPPK1, PLEC	84	2	16021	190.726	0.991594	0.796671	13.7436
UP_SEQ_FEATURE	repeat:Plectin 32	2	2.10526	0.0103349	EPPK1, PLEC	84	2	16021	190.726	0.991594	0.796671	13.7436
UP_SEQ_FEATURE	repeat:Plectin 14	2	2.10526	0.0103349	EPPK1, PLEC	84	2	16021	190.726	0.991594	0.796671	13.7436
UP_SEQ_FEATURE	repeat:Plectin 33	2	2.10526	0.0103349	EPPK1, PLEC	84	2	16021	190.726	0.991594	0.796671	13.7436
UP_SEQ_FEATURE	repeat:Plectin 17	2	2.10526	0.0103349	EPPK1, PLEC	84	2	16021	190.726	0.991594	0.796671	13.7436
UP_SEQ_FEATURE	repeat:Plectin 15	2	2.10526	0.0103349	EPPK1, PLEC	84	2	16021	190.726	0.991594	0.796671	13.7436
UP_SEQ_FEATURE	domain:RRM 1	4	4.21053	0.0107255	GM5643, TARDBP, HNRNPF, CELF2	84	88	16021	8.66937	0.99299	0.710643	14.2269
UP_SEQ_FEATURE	cross-link:Glycyl lysine isopeptide (Lys-Gly) (interchain with G-Cter in SUMO)	4	4.21053	0.0107255	GM5643, HNRNPF, HNRNPC, TCF7L2	84	88	16021	8.66937	0.99299	0.710643	14.2269
UP_SEQ_FEATURE	domain:RRM 2	4	4.21053	0.0107255	GM5643, TARDBP, HNRNPF, CELF2	84	88	16021	8.66937	0.99299	0.710643	14.2269
UP_SEQ_FEATURE	domain:PUM-HD	2	2.10526	0.0154627	PUM1, PUM2	84	3	16021	127.151	0.999229	0.76157	19.8906
UP_SEQ_FEATURE	repeat:GTF2I-like 2	2	2.10526	0.0154627	GTF2I, GTF2IRD1	84	3	16021	127.151	0.999229	0.76157	19.8906
UP_SEQ_FEATURE	repeat:Plectin 8	2	2.10526	0.0154627	EPPK1, PLEC	84	3	16021	127.151	0.999229	0.76157	19.8906
UP_SEQ_FEATURE	repeat:GTF2I-like 1	2	2.10526	0.0154627	GTF2I, GTF2IRD1	84	3	16021	127.151	0.999229	0.76157	19.8906
UP_SEQ_FEATURE	repeat:Plectin 9	2	2.10526	0.0154627	EPPK1, PLEC	84	3	16021	127.151	0.999229	0.76157	19.8906
UP_SEQ_FEATURE	repeat:Plectin 11	2	2.10526	0.0154627	EPPK1, PLEC	84	3	16021	127.151	0.999229	0.76157	19.8906
UP_SEQ_FEATURE	repeat:Plectin 10	2	2.10526	0.0154627	EPPK1, PLEC	84	3	16021	127.151	0.999229	0.76157	19.8906
UP_SEQ_FEATURE	repeat:Plectin 6	2	2.10526	0.0205642	EPPK1, PLEC	84	4	16021	95.3631	0.999929	0.796691	25.5998
UP_SEQ_FEATURE	repeat:Plectin 3	2	2.10526	0.0205642	EPPK1, PLEC	84	4	16021	95.3631	0.999929	0.796691	25.5998
UP_SEQ_FEATURE	repeat:Pumilio 1	2	2.10526	0.0205642	PUM1, PUM2	84	4	16021	95.3631	0.999929	0.796691	25.5998
UP_SEQ_FEATURE	repeat:Pumilio 5	2	2.10526	0.0205642	PUM1, PUM2	84	4	16021	95.3631	0.999929	0.796691	25.5998
UP_SEQ_FEATURE	repeat:Pumilio 6	2	2.10526	0.0205642	PUM1, PUM2	84	4	16021	95.3631	0.999929	0.796691	25.5998
UP_SEQ_FEATURE	repeat:Pumilio 4	2	2.10526	0.0205642	PUM1, PUM2	84	4	16021	95.3631	0.999929	0.796691	25.5998
UP_SEQ_FEATURE	repeat:Pumilio 3	2	2.10526	0.0205642	PUM1, PUM2	84	4	16021	95.3631	0.999929	0.796691	25.5998
UP_SEQ_FEATURE	repeat:Plectin 4	2	2.10526	0.0205642	EPPK1, PLEC	84	4	16021	95.3631	0.999929	0.796691	25.5998
UP_SEQ_FEATURE	domain:TLD	2	2.10526	0.0205642	TBC1D24, OXR1	84	4	16021	95.3631	0.999929	0.796691	25.5998
UP_SEQ_FEATURE	repeat:Pumilio 2	2	2.10526	0.0205642	PUM1, PUM2	84	4	16021	95.3631	0.999929	0.796691	25.5998
UP_SEQ_FEATURE	repeat:Plectin 5	2	2.10526	0.0205642	EPPK1, PLEC	84	4	16021	95.3631	0.999929	0.796691	25.5998
UP_SEQ_FEATURE	repeat:Plectin 7	2	2.10526	0.0205642	EPPK1, PLEC	84	4	16021	95.3631	0.999929	0.796691	25.5998
UP_SEQ_FEATURE	compositionally biased region:Ala-rich	4	4.21053	0.0208755	PUM1, CELF2, GNAS, PUM2	84	113	16021	6.75137	0.999939	0.750011	25.9356
UP_SEQ_FEATURE	repeat:Plectin 1	2	2.10526	0.0256397	EPPK1, PLEC	84	5	16021	76.2905	0.999994	0.775417	30.9024
UP_SEQ_FEATURE	repeat:Plectin 2	2	2.10526	0.0256397	EPPK1, PLEC	84	5	16021	76.2905	0.999994	0.775417	30.9024
UP_SEQ_FEATURE	sequence variant	6	6.31579	0.0397704	CD44, DYNLT1E, UBAP2L, GNAS, DYNLT1F, CACNA2D2, TCF3	84	362	16021	3.16121	1	0.874347	43.8731
UP_SEQ_FEATURE	compositionally biased region:Ser-rich	6	6.31579	0.0472867	ABLIM2, GTF2IRD1, PUM1, PUM2, ACIN1, ASPH	84	380	16021	3.01147	1	0.892289	49.8119

## Sheet: Cluster7
Table S4: Hierarchical clustering of genes differentially regulated in the presence or absence of microbiota; Cluster 7
Category	Term	Count	%	PValue	Genes	List Total	Pop Hits	Pop Total	Fold Enrichment	Bonferroni	Benjamini	FDR
BIOCARTA	m_ctlPathway:CTL mediated immune response against target cells	3	4.47761	0.00591784	CD3G, GZMB, ITGB2	14	11	1171	22.8117	0.168062	0.168062	4.97121
BIOCARTA	m_setPathway:Granzyme A mediated Apoptosis Pathway	2	2.98507	0.0959044	GZMA, GZMB	14	9	1171	18.5873	0.956082	0.790433	57.9424
GOTERM_BP_FAT	GO:0019886~antigen processing and presentation of exogenous peptide antigen via MHC class II	6	8.95522	2.8511e-09	H2-EB1, H2-AA, H2-DMB1, H2-AB1, CD74, H2-DMB2	53	16	13588	96.1415	1.84181e-06	1.84181e-06	4.25341e-06
GOTERM_BP_FAT	GO:0002495~antigen processing and presentation of peptide antigen via MHC class II	6	8.95522	2.8511e-09	H2-EB1, H2-AA, H2-DMB1, H2-AB1, CD74, H2-DMB2	53	16	13588	96.1415	1.84181e-06	1.84181e-06	4.25341e-06
GOTERM_BP_FAT	GO:0002504~antigen processing and presentation of peptide or polysaccharide antigen via MHC class II	6	8.95522	7.52441e-09	H2-EB1, H2-AA, H2-DMB1, H2-AB1, CD74, H2-DMB2	53	19	13588	80.9613	4.86076e-06	2.43038e-06	1.12253e-05
GOTERM_BP_FAT	GO:0002478~antigen processing and presentation of exogenous peptide antigen	6	8.95522	2.15241e-08	H2-EB1, H2-AA, H2-DMB1, H2-AB1, CD74, H2-DMB2	53	23	13588	66.8811	1.39045e-05	4.63485e-06	3.21107e-05
GOTERM_BP_FAT	GO:0019884~antigen processing and presentation of exogenous antigen	6	8.95522	6.19655e-08	H2-EB1, H2-AA, H2-DMB1, H2-AB1, CD74, H2-DMB2	53	28	13588	54.938	4.00289e-05	1.00074e-05	9.24432e-05
GOTERM_BP_FAT	GO:0006955~immune response	13	19.403	1.52924e-07	CIITA, IL1RL1, H2-DMB1, H2-AB1, CCL5, CD74, H2-DMB2, ADA, APOA4, TNFSF13B, H2-EB1, H2-AA, CD7	53	471	13588	7.07623	9.87839e-05	1.97576e-05	0.000228139
GOTERM_BP_FAT	GO:0048002~antigen processing and presentation of peptide antigen	6	8.95522	2.00587e-07	H2-EB1, H2-AA, H2-DMB1, H2-AB1, CD74, H2-DMB2	53	35	13588	43.9504	0.000129571	2.15963e-05	0.000299245
GOTERM_BP_FAT	GO:0019882~antigen processing and presentation	6	8.95522	1.96512e-05	H2-EB1, H2-AA, H2-DMB1, H2-AB1, CD74, H2-DMB2	53	87	13588	17.6812	0.0126145	0.0018119	0.0293126
GOTERM_BP_FAT	GO:0006952~defense response	9	13.4328	0.000275884	APOA4, CIITA, IL1RL1, H2-AA, ITGB2, ALOX5, CCL5, CD74, FN1	53	448	13588	5.15044	0.163263	0.0220344	0.410789
GOTERM_BP_FAT	GO:0051085~chaperone mediated protein folding requiring cofactor	3	4.47761	0.000925086	H2-DMB1, CD74, H2-DMB2	53	12	13588	64.0943	0.450025	0.0642728	1.37124
GOTERM_BP_FAT	GO:0006458~'de novo' protein folding	3	4.47761	0.00126926	H2-DMB1, CD74, H2-DMB2	53	14	13588	54.938	0.559773	0.0787708	1.87691
GOTERM_BP_FAT	GO:0051084~'de novo' posttranslational protein folding	3	4.47761	0.00126926	H2-DMB1, CD74, H2-DMB2	53	14	13588	54.938	0.559773	0.0787708	1.87691
GOTERM_BP_FAT	GO:0050870~positive regulation of T cell activation	4	5.97015	0.00204094	TNFSF13B, H2-AA, CD74, ADA	53	66	13588	15.538	0.73281	0.113063	3.00191
GOTERM_BP_FAT	GO:0051251~positive regulation of lymphocyte activation	4	5.97015	0.00554594	TNFSF13B, H2-AA, CD74, ADA	53	94	13588	10.9097	0.972475	0.258728	7.96188
GOTERM_BP_FAT	GO:0002696~positive regulation of leukocyte activation	4	5.97015	0.00640321	TNFSF13B, H2-AA, CD74, ADA	53	99	13588	10.3587	0.984232	0.27328	9.13847
GOTERM_BP_FAT	GO:0045582~positive regulation of T cell differentiation	3	4.47761	0.00662047	H2-AA, CD74, ADA	53	32	13588	24.0354	0.986309	0.263984	9.43441
GOTERM_BP_FAT	GO:0050867~positive regulation of cell activation	4	5.97015	0.00676703	TNFSF13B, H2-AA, CD74, ADA	53	101	13588	10.1536	0.987554	0.253548	9.63355
GOTERM_BP_FAT	GO:0045621~positive regulation of lymphocyte differentiation	3	4.47761	0.00745166	H2-AA, CD74, ADA	53	34	13588	22.6215	0.992028	0.260652	10.5584
GOTERM_BP_FAT	GO:0050863~regulation of T cell activation	4	5.97015	0.00813632	TNFSF13B, H2-AA, CD74, ADA	53	108	13588	9.49546	0.994895	0.266879	11.4744
GOTERM_BP_FAT	GO:0006935~chemotaxis	4	5.97015	0.00834427	DOCK2, RAC2, ITGB2, CCL5	53	109	13588	9.40834	0.995542	0.259717	11.7509
GOTERM_BP_FAT	GO:0042330~taxis	4	5.97015	0.00834427	DOCK2, RAC2, ITGB2, CCL5	53	109	13588	9.40834	0.995542	0.259717	11.7509
GOTERM_BP_FAT	GO:0051094~positive regulation of developmental process	5	7.46269	0.00897557	GATA4, H2-AA, ITGB2, CD74, ADA	53	214	13588	5.99013	0.997045	0.264016	12.5853
GOTERM_BP_FAT	GO:0006954~inflammatory response	5	7.46269	0.0106516	CIITA, ITGB2, ALOX5, CCL5, FN1	53	225	13588	5.69727	0.99901	0.292411	14.765
GOTERM_BP_FAT	GO:0045580~regulation of T cell differentiation	3	4.47761	0.0144814	H2-AA, CD74, ADA	53	48	13588	16.0236	0.999919	0.361563	19.5569
GOTERM_BP_FAT	GO:0002636~positive regulation of germinal center formation	2	2.98507	0.0152216	TNFSF13B, ADA	53	4	13588	128.189	0.99995	0.362627	20.4536
GOTERM_BP_FAT	GO:0007160~cell-matrix adhesion	3	4.47761	0.0156506	ITGB7, ITGB2, FN1	53	50	13588	15.3826	0.999962	0.357927	20.9689
GOTERM_BP_FAT	GO:0051249~regulation of lymphocyte activation	4	5.97015	0.0176455	TNFSF13B, H2-AA, CD74, ADA	53	144	13588	7.12159	0.99999	0.38072	23.325
GOTERM_BP_FAT	GO:0002634~regulation of germinal center formation	2	2.98507	0.0189914	TNFSF13B, ADA	53	5	13588	102.551	0.999996	0.390708	24.8774
GOTERM_BP_FAT	GO:0031589~cell-substrate adhesion	3	4.47761	0.0200473	ITGB7, ITGB2, FN1	53	57	13588	13.4935	0.999998	0.395383	26.0747
GOTERM_BP_FAT	GO:0045619~regulation of lymphocyte differentiation	3	4.47761	0.0207131	H2-AA, CD74, ADA	53	58	13588	13.2609	0.999999	0.393945	26.8204
GOTERM_BP_FAT	GO:0002694~regulation of leukocyte activation	4	5.97015	0.0210459	TNFSF13B, H2-AA, CD74, ADA	53	154	13588	6.65915	0.999999	0.387827	27.1905
GOTERM_BP_FAT	GO:0050865~regulation of cell activation	4	5.97015	0.0217662	TNFSF13B, H2-AA, CD74, ADA	53	156	13588	6.57378	0.999999	0.387506	27.9857
GOTERM_BP_FAT	GO:0045597~positive regulation of cell differentiation	4	5.97015	0.0292803	GATA4, H2-AA, CD74, ADA	53	175	13588	5.86005	1	0.472664	35.8112
GOTERM_BP_FAT	GO:0045059~positive thymic T cell selection	2	2.98507	0.030216	DOCK2, CD74	53	8	13588	64.0943	1	0.472376	36.728
GOTERM_BP_FAT	GO:0045060~negative thymic T cell selection	2	2.98507	0.0339294	DOCK2, CD74	53	9	13588	56.9727	1	0.501843	40.2477
GOTERM_BP_FAT	GO:0046649~lymphocyte activation	4	5.97015	0.036545	DOCK2, ITGB2, CD74, ADA	53	191	13588	5.36916	1	0.517511	42.6163
GOTERM_BP_FAT	GO:0043383~negative T cell selection	2	2.98507	0.037629	DOCK2, CD74	53	10	13588	51.2755	1	0.517488	43.5719
GOTERM_BP_FAT	GO:0043368~positive T cell selection	2	2.98507	0.037629	DOCK2, CD74	53	10	13588	51.2755	1	0.517488	43.5719
GOTERM_BP_FAT	GO:0009611~response to wounding	5	7.46269	0.0433684	CIITA, ITGB2, ALOX5, CCL5, FN1	53	347	13588	3.6942	1	0.558833	48.3893
GOTERM_BP_FAT	GO:0002684~positive regulation of immune system process	4	5.97015	0.0441223	TNFSF13B, H2-AA, CD74, ADA	53	206	13588	4.9782	1	0.55503	48.9927
GOTERM_BP_FAT	GO:0045321~leukocyte activation	4	5.97015	0.0512763	DOCK2, ITGB2, CD74, ADA	53	219	13588	4.68269	1	0.601092	54.4006
GOTERM_BP_FAT	GO:0048566~embryonic gut development	2	2.98507	0.0522886	GATA4, ADA	53	14	13588	36.6253	1	0.598677	55.1211
GOTERM_BP_FAT	GO:0045061~thymic T cell selection	2	2.98507	0.0559191	DOCK2, CD74	53	15	13588	34.1836	1	0.614477	57.6187
GOTERM_BP_FAT	GO:0007155~cell adhesion	6	8.95522	0.06246	CD96, SIGLEC5, ITGB7, CYFIP2, ITGB2, FN1	53	561	13588	2.742	1	0.647113	61.7942
GOTERM_BP_FAT	GO:0022610~biological adhesion	6	8.95522	0.0628432	CD96, SIGLEC5, ITGB7, CYFIP2, ITGB2, FN1	53	562	13588	2.73712	1	0.640357	62.0264
GOTERM_BP_FAT	GO:0045766~positive regulation of angiogenesis	2	2.98507	0.0631393	GATA4, ITGB2	53	17	13588	30.162	1	0.63328	62.2051
GOTERM_BP_FAT	GO:0009395~phospholipid catabolic process	2	2.98507	0.0631393	ENPP7, PLA2G4C	53	17	13588	30.162	1	0.63328	62.2051
GOTERM_BP_FAT	GO:0045087~innate immune response	3	4.47761	0.0631612	APOA4, CIITA, IL1RL1	53	107	13588	7.18815	1	0.624756	62.2183
GOTERM_BP_FAT	GO:0007626~locomotory behavior	4	5.97015	0.0633132	DOCK2, RAC2, ITGB2, CCL5	53	239	13588	4.29083	1	0.617216	62.3096
GOTERM_BP_FAT	GO:0001775~cell activation	4	5.97015	0.0678117	DOCK2, ITGB2, CD74, ADA	53	246	13588	4.16874	1	0.635072	64.9216
GOTERM_BP_FAT	GO:0030098~lymphocyte differentiation	3	4.47761	0.0705488	DOCK2, CD74, ADA	53	114	13588	6.74677	1	0.642076	66.4272
GOTERM_BP_FAT	GO:0042110~T cell activation	3	4.47761	0.0727097	DOCK2, ITGB2, CD74	53	116	13588	6.63045	1	0.645684	67.5729
GOTERM_BP_FAT	GO:0045058~T cell selection	2	2.98507	0.0774176	DOCK2, CD74	53	21	13588	24.4169	1	0.661914	69.9441
GOTERM_BP_FAT	GO:0030890~positive regulation of B cell proliferation	2	2.98507	0.0809537	TNFSF13B, ADA	53	22	13588	23.307	1	0.671412	71.6176
GOTERM_BP_FAT	GO:0002252~immune effector process	3	4.47761	0.0838271	TNFSF13B, H2-AA, CD74	53	126	13588	6.10422	1	0.677337	72.913
GOTERM_BP_FAT	GO:0019835~cytolysis	2	2.98507	0.0844765	GZMA, GZMB	53	23	13588	22.2937	1	0.673051	73.1981
GOTERM_BP_FAT	GO:0006457~protein folding	3	4.47761	0.0849662	H2-DMB1, CD74, H2-DMB2	53	127	13588	6.05616	1	0.668159	73.4112
GOTERM_BP_FAT	GO:0010741~negative regulation of protein kinase cascade	2	2.98507	0.0914825	IL1RL1, SOCS1	53	25	13588	20.5102	1	0.689445	76.1001
GOTERM_BP_FAT	GO:0008284~positive regulation of cell proliferation	4	5.97015	0.0946533	FGF15, TNFSF13B, RAC2, ADA	53	284	13588	3.61095	1	0.695646	77.3148
GOTERM_BP_FAT	GO:0050778~positive regulation of immune response	3	4.47761	0.0954275	TNFSF13B, H2-AA, ADA	53	136	13588	5.65538	1	0.692101	77.6025
GOTERM_BP_FAT	GO:0006508~proteolysis	8	11.9403	0.0975046	GZMA, MCPT1, SOCS1, UBD, GZMB, MCPT2, PCSK6, PMEPA1	53	1034	13588	1.98358	1	0.693785	78.3576
GOTERM_BP_FAT	GO:0046456~icosanoid biosynthetic process	2	2.98507	0.0984358	ALOX5, CD74	53	27	13588	18.9909	1	0.690997	78.6883
GOTERM_CC_FAT	GO:0042613~MHC class II protein complex	5	7.46269	2.27533e-08	H2-EB1, H2-AA, H2-DMB1, H2-AB1, H2-DMB2	43	10	12504	145.395	2.07055e-06	2.07055e-06	2.48055e-05
GOTERM_CC_FAT	GO:0042611~MHC protein complex	5	7.46269	2.64839e-05	H2-EB1, H2-AA, H2-DMB1, H2-AB1, H2-DMB2	43	52	12504	27.9606	0.00240717	0.00120431	0.0288688
GOTERM_CC_FAT	GO:0044459~plasma membrane part	16	23.8806	0.000159186	CD3G, IL1RL1, H2-DMB1, ITGB2, H2-AB1, H2-DMB2, CD74, LAPTM5, ITGB7, H2-EB1, CYFIP2, H2-AA, MSN, SLC28A2, KCTD12, FN1	43	1633	12504	2.84914	0.0143827	0.00481739	0.173407
GOTERM_CC_FAT	GO:0005771~multivesicular body	3	4.47761	0.000390648	H2-AB1, CD74, H2-DMB2	43	9	12504	96.9302	0.0349312	0.00884958	0.425058
GOTERM_CC_FAT	GO:0005886~plasma membrane	21	31.3433	0.00045417	ITK, CD3G, IL1RL1, H2-DMB1, H2-AB1, ITGB2, H2-DMB2, CD74, LAPTM5, TNFSF13B, SLC2A2, ITGB7, H2-EB1, CYFIP2, H2-AA, MSN, SLC30A10, SLC28A2, PMEPA1, KCTD12, FN1	43	2906	12504	2.10138	0.0404961	0.00823369	0.49402
GOTERM_CC_FAT	GO:0005764~lysosome	5	7.46269	0.00291428	LAPTM5, H2-AA, H2-DMB1, CD74, H2-DMB2	43	178	12504	8.16828	0.233244	0.043299	3.13167
GOTERM_CC_FAT	GO:0000323~lytic vacuole	5	7.46269	0.00297369	LAPTM5, H2-AA, H2-DMB1, CD74, H2-DMB2	43	179	12504	8.12265	0.237391	0.0379757	3.19458
GOTERM_CC_FAT	GO:0005773~vacuole	5	7.46269	0.00474225	LAPTM5, H2-AA, H2-DMB1, CD74, H2-DMB2	43	204	12504	7.12722	0.351161	0.0526355	5.05027
GOTERM_CC_FAT	GO:0005770~late endosome	3	4.47761	0.00952973	H2-AB1, CD74, H2-DMB2	43	44	12504	19.8266	0.581619	0.092279	9.91266
GOTERM_CC_FAT	GO:0005768~endosome	5	7.46269	0.00989162	SLC2A2, H2-DMB1, H2-AB1, CD74, H2-DMB2	43	252	12504	5.76966	0.595304	0.0864908	10.2708
GOTERM_CC_FAT	GO:0009986~cell surface	5	7.46269	0.0187648	IL1RL1, H2-AA, H2-AB1, ITGB2, CD74	43	305	12504	4.76706	0.821617	0.145049	18.6587
GOTERM_CC_FAT	GO:0043235~receptor complex	3	4.47761	0.0315759	CD3G, ITGB7, ITGB2	43	83	12504	10.5105	0.946053	0.215973	29.5164
GOTERM_CC_FAT	GO:0005887~integral to plasma membrane	6	8.95522	0.0316004	LAPTM5, ITGB7, ITGB2, SLC28A2, CD74, KCTD12	43	531	12504	3.28577	0.946177	0.201303	29.5358
GOTERM_CC_FAT	GO:0009897~external side of plasma membrane	4	5.97015	0.0316033	IL1RL1, H2-AA, H2-AB1, CD74	43	206	12504	5.64642	0.946192	0.188392	29.5381
GOTERM_CC_FAT	GO:0031226~intrinsic to plasma membrane	6	8.95522	0.0364686	LAPTM5, ITGB7, ITGB2, SLC28A2, CD74, KCTD12	43	552	12504	3.16077	0.965975	0.201785	33.3029
GOTERM_CC_FAT	GO:0000267~cell fraction	6	8.95522	0.048123	ME1, RAC2, CYP3A11, CYFIP2, ITGB2, CYP2B10	43	596	12504	2.92742	0.988758	0.244597	41.5896
GOTERM_CC_FAT	GO:0005765~lysosomal membrane	2	2.98507	0.0588038	LAPTM5, H2-DMB2	43	18	12504	32.3101	0.995974	0.277045	48.3509
GOTERM_CC_FAT	GO:0019898~extrinsic to membrane	5	7.46269	0.0727556	DOCK2, CYP3A11, MSN, ALOX5, CYP2B10	43	472	12504	3.08041	0.998966	0.317428	56.1112
GOTERM_CC_FAT	GO:0005774~vacuolar membrane	2	2.98507	0.0899996	LAPTM5, H2-DMB2	43	28	12504	20.7708	0.999813	0.363453	64.2336
GOTERM_CC_FAT	GO:0008305~integrin complex	2	2.98507	0.0899996	ITGB7, ITGB2	43	28	12504	20.7708	0.999813	0.363453	64.2336
GOTERM_CC_FAT	GO:0005624~membrane fraction	5	7.46269	0.0907216	RAC2, CYP3A11, CYFIP2, ITGB2, CYP2B10	43	510	12504	2.85089	0.999826	0.35126	64.5418
GOTERM_CC_FAT	GO:0005626~insoluble fraction	5	7.46269	0.0999243	RAC2, CYP3A11, CYFIP2, ITGB2, CYP2B10	43	528	12504	2.7537	0.999931	0.366312	68.2639
GOTERM_MF_FAT	GO:0004252~serine-type endopeptidase activity	5	7.46269	0.00548225	GZMA, MCPT1, GZMB, MCPT2, PCSK6	51	189	13288	6.89283	0.607236	0.607236	6.48671
GOTERM_MF_FAT	GO:0008236~serine-type peptidase activity	5	7.46269	0.00817715	GZMA, MCPT1, GZMB, MCPT2, PCSK6	51	212	13288	6.14502	0.752373	0.502378	9.53164
GOTERM_MF_FAT	GO:0017171~serine hydrolase activity	5	7.46269	0.00831087	GZMA, MCPT1, GZMB, MCPT2, PCSK6	51	213	13288	6.11617	0.757984	0.376818	9.68033
GOTERM_MF_FAT	GO:0046983~protein dimerization activity	5	7.46269	0.0385889	IKZF3, CD3G, GZMA, ITGB2, CREB3L3	51	340	13288	3.8316	0.998757	0.812225	38.128
GOTERM_MF_FAT	GO:0042605~peptide antigen binding	2	2.98507	0.0514344	H2-AA, H2-AB1	51	14	13288	37.2213	0.999874	0.83393	47.492
GOTERM_MF_FAT	GO:0042287~MHC protein binding	2	2.98507	0.0656476	H2-AA, CD74	51	18	13288	28.9499	0.99999	0.85396	56.3247
GOTERM_MF_FAT	GO:0004175~endopeptidase activity	5	7.46269	0.0731581	GZMA, MCPT1, GZMB, MCPT2, PCSK6	51	421	13288	3.09441	0.999998	0.841981	60.4201
GOTERM_MF_FAT	GO:0046982~protein heterodimerization activity	3	4.47761	0.075938	IKZF3, CD3G, ITGB2	51	121	13288	6.45989	0.999999	0.813298	61.8443
GOTERM_MF_FAT	GO:0017048~Rho GTPase binding	2	2.98507	0.0865767	FMNL1, DOCK10	51	24	13288	21.7124	1	0.819225	66.8712
INTERPRO	IPR014745:MHC class II, alpha/beta chain, N-terminal	5	7.46269	1.56542e-08	H2-EB1, H2-AA, H2-DMB1, H2-AB1, H2-DMB2	62	9	17763	159.167	2.95864e-06	2.95864e-06	1.94391e-05
INTERPRO	IPR000353:MHC class II, beta chain, N-terminal	4	5.97015	1.33557e-06	H2-EB1, H2-DMB1, H2-AB1, H2-DMB2	62	7	17763	163.714	0.000252391	0.000126203	0.00165847
INTERPRO	IPR003597:Immunoglobulin C1-set	5	7.46269	0.000188844	H2-EB1, H2-AA, H2-DMB1, H2-AB1, H2-DMB2	62	83	17763	17.259	0.0350654	0.0118278	0.23425
INTERPRO	IPR003006:Immunoglobulin/major histocompatibility complex, conserved site	5	7.46269	0.000357251	H2-EB1, H2-AA, H2-DMB1, H2-AB1, H2-DMB2	62	98	17763	14.6173	0.0653026	0.0167414	0.442723
INTERPRO	IPR007110:Immunoglobulin-like	9	13.4328	0.00102622	CD96, SIGLEC5, IL1RL1, H2-EB1, H2-AA, H2-DMB1, H2-AB1, H2-DMB2, CD7	62	604	17763	4.26904	0.176388	0.0380677	1.2669
INTERPRO	IPR013783:Immunoglobulin-like fold	9	13.4328	0.00154466	CD3G, SIGLEC5, IL1RL1, H2-EB1, H2-AA, H2-DMB1, H2-AB1, H2-DMB2, CD7	62	644	17763	4.00388	0.253355	0.0475278	1.9013
INTERPRO	IPR001314:Peptidase S1A, chymotrypsin	4	5.97015	0.0130838	GZMA, MCPT1, GZMB, MCPT2	62	143	17763	8.01399	0.917021	0.299244	15.0871
INTERPRO	IPR018114:Peptidase S1/S6, chymotrypsin/Hap, active site	4	5.97015	0.015128	GZMA, MCPT1, GZMB, MCPT2	62	151	17763	7.5894	0.943924	0.302415	17.2455
INTERPRO	IPR001254:Peptidase S1 and S6, chymotrypsin/Hap	4	5.97015	0.0173431	GZMA, MCPT1, GZMB, MCPT2	62	159	17763	7.20755	0.96336	0.307468	19.5273
INTERPRO	IPR014836:Integrin beta subunit, cytoplasmic	2	2.98507	0.0204314	ITGB7, ITGB2	62	6	17763	95.5	0.979789	0.323046	22.6122
INTERPRO	IPR012012:Integrin beta subunit, subgroup	2	2.98507	0.0271502	ITGB7, ITGB2	62	8	17763	71.625	0.994496	0.376832	28.9514
INTERPRO	IPR012896:Integrin beta subunit, tail	2	2.98507	0.0271502	ITGB7, ITGB2	62	8	17763	71.625	0.994496	0.376832	28.9514
INTERPRO	IPR002369:Integrin beta subunit, N-terminal	2	2.98507	0.0304925	ITGB7, ITGB2	62	9	17763	63.6667	0.997128	0.385983	31.9238
INTERPRO	IPR001169:Integrin beta subunit, C-terminal	2	2.98507	0.0338236	ITGB7, ITGB2	62	10	17763	57.3	0.998501	0.393622	34.7721
INTERPRO	IPR015812:Integrin beta subunit	2	2.98507	0.0338236	ITGB7, ITGB2	62	10	17763	57.3	0.998501	0.393622	34.7721
INTERPRO	IPR013032:EGF-like region, conserved site	4	5.97015	0.0906132	9530053A07RIK, ITGB7, ITGB2, FN1	62	310	17763	3.69677	1	0.7226	69.2568
KEGG_PATHWAY	mmu04672:Intestinal immune network for IgA production	7	10.4478	1.14522e-06	TNFSF13B, ITGB7, H2-EB1, H2-AA, H2-DMB1, H2-AB1, H2-DMB2	39	54	5738	19.0722	7.67266e-05	7.67266e-05	0.00117456
KEGG_PATHWAY	mmu04612:Antigen processing and presentation	7	10.4478	2.47361e-05	CIITA, H2-EB1, H2-AA, H2-DMB1, H2-AB1, CD74, H2-DMB2	39	91	5738	11.3176	0.00165596	0.000828325	0.0253672
KEGG_PATHWAY	mmu05416:Viral myocarditis	7	10.4478	2.9782e-05	RAC2, H2-EB1, H2-AA, H2-DMB1, H2-AB1, ITGB2, H2-DMB2	39	94	5738	10.9564	0.00199343	0.00066492	0.0305411
KEGG_PATHWAY	mmu05330:Allograft rejection	6	8.95522	3.44473e-05	H2-EB1, H2-AA, H2-DMB1, GZMB, H2-AB1, H2-DMB2	39	58	5738	15.2202	0.00230535	0.000576836	0.0353246
KEGG_PATHWAY	mmu05332:Graft-versus-host disease	6	8.95522	3.44473e-05	H2-EB1, H2-AA, H2-DMB1, GZMB, H2-AB1, H2-DMB2	39	58	5738	15.2202	0.00230535	0.000576836	0.0353246
KEGG_PATHWAY	mmu04940:Type I diabetes mellitus	6	8.95522	5.15856e-05	H2-EB1, H2-AA, H2-DMB1, GZMB, H2-AB1, H2-DMB2	39	63	5738	14.0122	0.00345036	0.000691026	0.0528951
KEGG_PATHWAY	mmu05310:Asthma	5	7.46269	5.83263e-05	H2-EB1, H2-AA, H2-DMB1, H2-AB1, H2-DMB2	39	33	5738	22.2922	0.00390035	0.000651118	0.0598051
KEGG_PATHWAY	mmu05320:Autoimmune thyroid disease	6	8.95522	9.83353e-05	H2-EB1, H2-AA, H2-DMB1, GZMB, H2-AB1, H2-DMB2	39	72	5738	12.2607	0.00656713	0.000940813	0.10081
KEGG_PATHWAY	mmu04514:Cell adhesion molecules (CAMs)	7	10.4478	0.000459778	ITGB7, H2-EB1, H2-AA, H2-DMB1, H2-AB1, ITGB2, H2-DMB2	39	154	5738	6.68765	0.0303424	0.00384412	0.470561
KEGG_PATHWAY	mmu04810:Regulation of actin cytoskeleton	7	10.4478	0.00273239	FGF15, RAC2, ITGB7, CYFIP2, ITGB2, MSN, FN1	39	217	5738	4.74607	0.167499	0.0201629	2.76725
KEGG_PATHWAY	mmu05322:Systemic lupus erythematosus	5	7.46269	0.00452394	H2-EB1, H2-AA, H2-DMB1, H2-AB1, H2-DMB2	39	103	5738	7.14215	0.261985	0.0299224	4.54394
KEGG_PATHWAY	mmu04640:Hematopoietic cell lineage	4	5.97015	0.0176618	CD3G, H2-EB1, H2-AA, CD7	39	84	5738	7.00611	0.696968	0.102855	16.7035
KEGG_PATHWAY	mmu04670:Leukocyte transendothelial migration	4	5.97015	0.043357	ITK, RAC2, ITGB2, MSN	39	119	5738	4.94549	0.948685	0.219235	36.5305
PIR_SUPERFAMILY	PIRSF001991:class II histocompatibility antigen	5	7.46269	6.6534e-08	H2-EB1, H2-AA, H2-DMB1, H2-AB1, H2-DMB2	37	10	8136	109.946	2.72789e-06	2.72789e-06	6.12292e-05
PIR_SUPERFAMILY	PIRSF002512:integrin, beta subunit	2	2.98507	0.0305764	ITGB7, ITGB2	37	7	8136	62.8263	0.720066	0.470912	24.857
PIR_SUPERFAMILY	PIRSF002512:Integrin_B	2	2.98507	0.0348696	ITGB7, ITGB2	37	8	8136	54.973	0.766641	0.384339	27.8644
PIR_SUPERFAMILY	PIRSF001135:trypsin	3	4.47761	0.0361291	GZMA, GZMB, MCPT2	37	68	8136	9.70111	0.778806	0.314206	28.7261
SMART	SM00407:IGc1	5	7.46269	0.000452201	H2-EB1, H2-AA, H2-DMB1, H2-AB1, H2-DMB2	41	83	9131	13.4161	0.0192611	0.0192611	0.420028
SMART	SM00020:Tryp_SPc	4	5.97015	0.0319925	GZMA, MCPT1, GZMB, MCPT2	41	159	9131	5.6027	0.75295	0.502959	26.1097
SMART	SM00187:INB	2	2.98507	0.038759	ITGB7, ITGB2	41	9	9131	49.4905	0.817279	0.432547	30.779
SP_PIR_KEYWORDS	mhc ii	5	7.46269	3.73582e-08	H2-EB1, H2-AA, H2-DMB1, H2-AB1, H2-DMB2	61	11	17854	133.04	5.19277e-06	5.19277e-06	4.40235e-05
SP_PIR_KEYWORDS	heterodimer	5	7.46269	9.61967e-06	ITGB7, H2-EB1, H2-AA, H2-AB1, ITGB2	61	40	17854	36.5861	0.00133625	0.000668347	0.0113354
SP_PIR_KEYWORDS	transmembrane protein	8	11.9403	0.000232932	CD3G, CYP3A11, H2-EB1, H2-AA, H2-DMB1, H2-AB1, CYP2B10, CD74	61	370	17854	6.3284	0.0318626	0.0107357	0.274146
SP_PIR_KEYWORDS	immune response	6	8.95522	0.000380018	H2-EB1, H2-AA, H2-DMB1, H2-AB1, CD74, CD7	61	184	17854	9.54419	0.0514611	0.0131213	0.446903
SP_PIR_KEYWORDS	signal	21	31.3433	0.00117949	9930013L23RIK, CD3G, FGF15, GZMA, IL1RL1, MCPT1, H2-DMB1, MCPT2, H2-AB1, ITGB2, GZMB, CCL5, H2-DMB2, APOA4, CD96, SIGLEC5, ITGB7, H2-EB1, H2-AA, FN1, CD7	61	2970	17854	2.06951	0.151297	0.0322768	1.38113
SP_PIR_KEYWORDS	cell adhesion	7	10.4478	0.00169808	CD96, SIGLEC5, ITGB7, CYFIP2, ITGB2, ADA, FN1	61	380	17854	5.39163	0.210404	0.0386072	1.98282
SP_PIR_KEYWORDS	Serine protease	5	7.46269	0.00224347	GZMA, MCPT1, GZMB, MCPT2, PCSK6	61	164	17854	8.92343	0.268159	0.0436189	2.61199
SP_PIR_KEYWORDS	disulfide bond	18	26.8657	0.00247705	CD3G, GZMA, IL1RL1, MCPT1, MCPT2, H2-AB1, ITGB2, GZMB, CCL5, CD74, CD96, TNFSF13B, SIGLEC5, ITGB7, H2-EB1, H2-AA, FN1, CD7	61	2469	17854	2.13382	0.291594	0.0421769	2.88033
SP_PIR_KEYWORDS	membrane	29	43.2836	0.0071799	ITGB2, ADA, CD74, TMEM140, CD96, DOCK2, LAPTM5, RAC2, SLC2A2, ITGB7, MSN, CREB3L3, SLC28A2, CD7, ITK, CD3G, IL1RL1, CYP3A11, H2-DMB1, H2-AB1, CYP2B10, TNFSF13B, SIGLEC5, H2-EB1, H2-AA, ALOX5, SLC30A10, FILIP1L, PMEPA1	61	5507	17854	1.54131	0.632711	0.10532	8.14091
SP_PIR_KEYWORDS	duplication	4	5.97015	0.00766957	APOA4, ITGB7, UBD, ITGB2	61	120	17854	9.75628	0.657053	0.10149	8.67338
SP_PIR_KEYWORDS	glycoprotein	21	31.3433	0.0115348	9930013L23RIK, CD3G, GZMA, IL1RL1, MCPT1, H2-DMB1, MCPT2, H2-AB1, ITGB2, GZMB, CD74, CD96, TNFSF13B, SIGLEC5, SLC2A2, ITGB7, H2-EB1, H2-AA, CREB3L3, FN1, CD7	61	3600	17854	1.70735	0.800644	0.136365	12.7784
SP_PIR_KEYWORDS	metalloprotein	3	4.47761	0.0152244	CYP3A11, CYP2B10, ADA	61	56	17854	15.6797	0.881455	0.162811	16.5386
SP_PIR_KEYWORDS	polyprotein	2	2.98507	0.0166923	H2-AA, UBD	61	5	17854	117.075	0.903654	0.164717	17.9929
SP_PIR_KEYWORDS	zymogen	4	5.97015	0.0293416	GZMA, MCPT1, GZMB, MCPT2	61	199	17854	5.88319	0.984069	0.255974	29.5975
SP_PIR_KEYWORDS	cytolysis	2	2.98507	0.0460507	GZMA, GZMB	61	14	17854	41.8126	0.998574	0.353947	42.625
SP_PIR_KEYWORDS	Immunoglobulin domain	5	7.46269	0.0615569	CD96, CD3G, SIGLEC5, IL1RL1, CD7	61	443	17854	3.30348	0.999854	0.42417	52.7012
SP_PIR_KEYWORDS	electron transfer	2	2.98507	0.0869413	CYP3A11, CYP2B10	61	27	17854	21.6806	0.999997	0.524644	65.7619
SP_PIR_KEYWORDS	Protease	5	7.46269	0.0916057	GZMA, MCPT1, GZMB, MCPT2, PCSK6	61	509	17854	2.87513	0.999998	0.523804	67.7672
SP_PIR_KEYWORDS	T-cell	2	2.98507	0.0991727	GZMA, GZMB	61	31	17854	18.8831	1	0.534235	70.7929
UP_SEQ_FEATURE	region of interest:Beta-1	3	4.47761	3.46391e-05	H2-EB1, H2-DMB1, H2-AB1	56	3	16021	286.089	0.00937775	0.00937775	0.0455866
UP_SEQ_FEATURE	region of interest:Beta-2	3	4.47761	3.46391e-05	H2-EB1, H2-DMB1, H2-AB1	56	3	16021	286.089	0.00937775	0.00937775	0.0455866
UP_SEQ_FEATURE	domain:Ig-like C1-type	4	5.97015	8.34659e-05	H2-EB1, H2-AA, H2-DMB1, H2-AB1	56	25	16021	45.7743	0.0224479	0.0112877	0.109812
UP_SEQ_FEATURE	region of interest:Connecting peptide	4	5.97015	0.000118021	H2-EB1, H2-AA, H2-DMB1, H2-AB1	56	28	16021	40.8699	0.0315936	0.0106441	0.155241
UP_SEQ_FEATURE	signal peptide	21	31.3433	0.0013296	9930013L23RIK, CD3G, FGF15, GZMA, IL1RL1, MCPT1, H2-DMB1, MCPT2, H2-AB1, ITGB2, GZMB, CCL5, H2-DMB2, APOA4, CD96, SIGLEC5, ITGB7, H2-EB1, H2-AA, FN1, CD7	56	2963	16021	2.02763	0.303642	0.086501	1.7361
UP_SEQ_FEATURE	disulfide bond	18	26.8657	0.001914	CD3G, GZMA, IL1RL1, MCPT1, MCPT2, H2-AB1, ITGB2, GZMB, CCL5, CD74, CD96, TNFSF13B, SIGLEC5, ITGB7, H2-EB1, H2-AA, FN1, CD7	56	2379	16021	2.16461	0.406136	0.098974	2.49031
UP_SEQ_FEATURE	propeptide:Activation peptide	4	5.97015	0.0024279	GZMA, MCPT1, GZMB, MCPT2	56	78	16021	14.6712	0.483765	0.104344	3.14913
UP_SEQ_FEATURE	topological domain:Extracellular	16	23.8806	0.0053544	CD3G, IL1RL1, ITGB2, H2-AB1, CD74, TMEM140, CD96, TNFSF13B, SIGLEC5, ITGB7, SLC2A2, H2-EB1, H2-AA, SLC30A10, PMEPA1, CD7	56	2174	16021	2.10553	0.767835	0.188293	6.82311
UP_SEQ_FEATURE	domain:Peptidase S1	4	5.97015	0.00653755	GZMA, MCPT1, GZMB, MCPT2	56	111	16021	10.3095	0.832044	0.19989	8.27155
UP_SEQ_FEATURE	glycosylation site:N-linked (GlcNAc...)	21	31.3433	0.00819822	9930013L23RIK, CD3G, GZMA, IL1RL1, MCPT1, H2-DMB1, MCPT2, H2-AB1, ITGB2, GZMB, CD74, CD96, TNFSF13B, SIGLEC5, SLC2A2, ITGB7, H2-EB1, H2-AA, CREB3L3, FN1, CD7	56	3444	16021	1.74445	0.893446	0.220256	10.2695
UP_SEQ_FEATURE	topological domain:Cytoplasmic	18	26.8657	0.00977956	CD3G, IL1RL1, H2-DMB1, ITGB2, H2-AB1, CD74, TMEM140, CD96, TNFSF13B, SIGLEC5, SLC2A2, ITGB7, H2-EB1, H2-AA, CREB3L3, SLC30A10, PMEPA1, CD7	56	2780	16021	1.85238	0.930964	0.234567	12.1346
UP_SEQ_FEATURE	region of interest:Cysteine-rich tandem repeats	2	2.98507	0.0271421	ITGB7, ITGB2	56	8	16021	71.5223	0.999438	0.493599	30.3867
UP_SEQ_FEATURE	active site:Charge relay system	4	5.97015	0.0304972	GZMA, MCPT1, GZMB, MCPT2	56	198	16021	5.77958	0.999781	0.504422	33.4815
UP_SEQ_FEATURE	domain:DHR-2	2	2.98507	0.0371328	DOCK2, DOCK10	56	11	16021	52.0162	0.999966	0.546937	39.2311
UP_SEQ_FEATURE	domain:DHR-1	2	2.98507	0.0371328	DOCK2, DOCK10	56	11	16021	52.0162	0.999966	0.546937	39.2311
UP_SEQ_FEATURE	repeat:IV	2	2.98507	0.069713	ITGB7, ITGB2	56	21	16021	27.2466	1	0.754375	61.3723
UP_SEQ_FEATURE	repeat:I	2	2.98507	0.069713	ITGB7, ITGB2	56	21	16021	27.2466	1	0.754375	61.3723
UP_SEQ_FEATURE	repeat:II	2	2.98507	0.069713	ITGB7, ITGB2	56	21	16021	27.2466	1	0.754375	61.3723
UP_SEQ_FEATURE	repeat:III	2	2.98507	0.069713	ITGB7, ITGB2	56	21	16021	27.2466	1	0.754375	61.3723
UP_SEQ_FEATURE	transmembrane region	20	29.8507	0.0904947	CD3G, IL1RL1, H2-DMB1, H2-AB1, ITGB2, CD74, TMEM140, CD96, LAPTM5, TNFSF13B, SIGLEC5, SLC2A2, ITGB7, H2-EB1, H2-AA, CREB3L3, SLC30A10, SLC28A2, PMEPA1, CD7	56	4113	16021	1.39115	1	0.820939	71.3091

## Sheet: Cluster8
Table S4: Hierarchical clustering of genes differentially regulated in the presence or absence of microbiota; Cluster 8
Category	Term	Count	%	PValue	Genes	List Total	Pop Hits	Pop Total	Fold Enrichment	Bonferroni	Benjamini	FDR
BIOCARTA	m_nuclearRsPathway:Nuclear Receptors in Lipid Metabolism and Toxicity	2	11.7647	0.0555913	ABCB1B, CYP4B1	3	33	1171	23.6566	0.204501	0.204501	19.618
GOTERM_CC_FAT	GO:0000267~cell fraction	3	17.6471	0.0938307	DES, ANPEP, CYP4B1	12	596	12504	5.24497	0.997777	0.997777	63.002
SP_PIR_KEYWORDS	muscle protein	3	17.6471	0.00078848	ACTG2, DES, MYL9	16	50	17854	66.9525	0.0552103	0.0552103	0.817672

## Sheet: Cluster9
Table S4: Hierarchical clustering of genes differentially regulated in the presence or absence of microbiota; Cluster 9
Category	Term	Count	%	PValue	Genes	List Total	Pop Hits	Pop Total	Fold Enrichment	Bonferroni	Benjamini	FDR
BIOCARTA	m_ace2Pathway:Angiotensin-converting enzyme 2 regulates heart function	2	2.89855	0.0136227	ACE, ACE2	3	8	1171	97.5833	0.0403138	0.0403138	4.22589
GOTERM_BP_FAT	GO:0006952~defense response	9	13.0435	0.000275884	REG3A, GM14851, PNLIPRP2, AY761184, LYZ1, DEFA22, DEFA21, DEFA20, EPHX2, VNN1, GM15308	53	448	13588	5.15044	0.112123	0.112123	0.388281
GOTERM_BP_FAT	GO:0042742~defense response to bacterium	4	5.7971	0.00813632	LYZ1, DEFA22, DEFA21, DEFA20, GM15308	53	108	13588	9.49546	0.970433	0.828049	10.8801
GOTERM_BP_FAT	GO:0006641~triglyceride metabolic process	3	4.34783	0.0083275	MOGAT2, APOC3, MTTP	53	36	13588	21.3648	0.97279	0.699225	11.122
GOTERM_BP_FAT	GO:0006869~lipid transport	4	5.7971	0.0105968	APOC3, NPC1L1, SLC27A4, MTTP	53	119	13588	8.61773	0.989863	0.682697	13.947
GOTERM_BP_FAT	GO:0006639~acylglycerol metabolic process	3	4.34783	0.0117345	MOGAT2, APOC3, MTTP	53	43	13588	17.8868	0.993826	0.638501	15.3317
GOTERM_BP_FAT	GO:0006814~sodium ion transport	4	5.7971	0.0121017	SLC5A4B, SLC13A1, SLC10A2, SLC34A2	53	125	13588	8.20408	0.99474	0.582976	15.7742
GOTERM_BP_FAT	GO:0006638~neutral lipid metabolic process	3	4.34783	0.0128027	MOGAT2, APOC3, MTTP	53	45	13588	17.0918	0.996126	0.547682	16.6129
GOTERM_BP_FAT	GO:0006662~glycerol ether metabolic process	3	4.34783	0.0128027	MOGAT2, APOC3, MTTP	53	45	13588	17.0918	0.996126	0.547682	16.6129
GOTERM_BP_FAT	GO:0010876~lipid localization	4	5.7971	0.012898	APOC3, NPC1L1, SLC27A4, MTTP	53	128	13588	8.01179	0.996284	0.503117	16.7264
GOTERM_BP_FAT	GO:0046486~glycerolipid metabolic process	4	5.7971	0.01317	MOGAT2, LRAT, APOC3, MTTP	53	129	13588	7.94969	0.9967	0.470004	17.0493
GOTERM_BP_FAT	GO:0018904~organic ether metabolic process	3	4.34783	0.0144814	MOGAT2, APOC3, MTTP	53	48	13588	16.0236	0.99814	0.466722	18.5901
GOTERM_BP_FAT	GO:0009617~response to bacterium	4	5.7971	0.0221314	LYZ1, DEFA22, DEFA21, DEFA20, GM15308	53	157	13588	6.53191	0.999935	0.583925	27.061
GOTERM_BP_FAT	GO:0008202~steroid metabolic process	4	5.7971	0.0236259	CUBN, APOC3, NPC1L1, FABP6	53	161	13588	6.36962	0.999967	0.576309	28.6171
GOTERM_BP_FAT	GO:0042953~lipoprotein transport	2	2.89855	0.0264885	CUBN, MTTP	53	7	13588	73.2507	0.999991	0.58936	31.5119
GOTERM_BP_FAT	GO:0008203~cholesterol metabolic process	3	4.34783	0.0293962	CUBN, APOC3, NPC1L1	53	70	13588	10.9876	0.999997	0.600903	34.3404
GOTERM_BP_FAT	GO:0016125~sterol metabolic process	3	4.34783	0.0350202	CUBN, APOC3, NPC1L1	53	77	13588	9.98873	1	0.640948	39.5057
GOTERM_BP_FAT	GO:0002526~acute inflammatory response	3	4.34783	0.0384067	REG3A, EPHX2, VNN1	53	81	13588	9.49546	1	0.651798	42.4312
GOTERM_BP_FAT	GO:0006508~proteolysis	9	13.0435	0.041469	ACE, BMP1, CNDP2, MEP1A, ACE2, MME, ENPEP, PRSS23, XPNPEP2	53	1034	13588	2.23152	1	0.658286	44.9628
GOTERM_BP_FAT	GO:0046942~carboxylic acid transport	3	4.34783	0.055072	SLC10A2, SLC6A19, SLC27A4	53	99	13588	7.76901	1	0.742406	55.0081
GOTERM_BP_FAT	GO:0001676~long-chain fatty acid metabolic process	2	2.89855	0.0559191	EPHX2, SLC27A4	53	15	13588	34.1836	1	0.728916	55.5735
GOTERM_BP_FAT	GO:0015849~organic acid transport	3	4.34783	0.0560616	SLC10A2, SLC6A19, SLC27A4	53	100	13588	7.69132	1	0.711573	55.6679
GOTERM_BP_FAT	GO:0015718~monocarboxylic acid transport	2	2.89855	0.0703054	SLC10A2, SLC27A4	53	19	13588	26.9871	1	0.776013	64.2221
GOTERM_BP_FAT	GO:0010817~regulation of hormone levels	3	4.34783	0.0861102	ACE, LRAT, TBX3	53	128	13588	6.00884	1	0.828654	71.9054
GOTERM_BP_FAT	GO:0006820~anion transport	3	4.34783	0.0884122	SLC13A1, SLC10A2, SLC34A2	53	130	13588	5.9164	1	0.823535	72.8869
GOTERM_BP_FAT	GO:0016042~lipid catabolic process	3	4.34783	0.0930712	PNLIPRP2, APOC3, SLC27A4	53	134	13588	5.73979	1	0.826985	74.7766
GOTERM_BP_FAT	GO:0055092~sterol homeostasis	2	2.89855	0.0949657	NPC1L1, MTTP	53	26	13588	19.7213	1	0.820978	75.5094
GOTERM_BP_FAT	GO:0042632~cholesterol homeostasis	2	2.89855	0.0949657	NPC1L1, MTTP	53	26	13588	19.7213	1	0.820978	75.5094
GOTERM_BP_FAT	GO:0007586~digestion	2	2.89855	0.0949657	MOGAT2, PNLIPRP2	53	26	13588	19.7213	1	0.820978	75.5094
GOTERM_BP_FAT	GO:0001501~skeletal system development	4	5.7971	0.0954119	OSR2, BMP1, TBX3, SOX6	53	285	13588	3.59828	1	0.810291	75.6792
GOTERM_CC_FAT	GO:0005903~brush border	5	7.24638	1.08108e-05	SIS, CUBN, ENPEP, SLC27A4, SLC34A2	51	35	12504	35.0252	0.000756474	0.000756474	0.0111877
GOTERM_CC_FAT	GO:0005576~extracellular region	16	23.1884	0.00175852	PXDN, PNLIPRP2, DEFA22, BMP1, DEFA21, DEFA20, SPINK3, REG3A, ACE, GM14851, AY761184, TGFBI, APOC3, ACE2, VNN1, PRAP1, PRSS23, GM15308	51	1680	12504	2.33501	0.115917	0.0597433	1.80503
GOTERM_CC_FAT	GO:0045177~apical part of cell	5	7.24638	0.00209313	CUBN, ENPEP, SLC10A2, AMN, SLC34A2	51	136	12504	9.01384	0.136423	0.047715	2.14514
GOTERM_CC_FAT	GO:0005615~extracellular space	8	11.5942	0.00397296	GM14851, AY761184, BMP1, DEFA22, DEFA21, DEFA20, APOC3, TGFBI, VNN1, GM15308	51	511	12504	3.83838	0.243204	0.0672941	4.03615
GOTERM_CC_FAT	GO:0016324~apical plasma membrane	4	5.7971	0.00720851	CUBN, ENPEP, SLC10A2, SLC34A2	51	99	12504	9.90612	0.397353	0.0963242	7.21378
GOTERM_CC_FAT	GO:0005783~endoplasmic reticulum	9	13.0435	0.0171928	MOGAT2, RDH7, LRAT, CUBN, CYP3A13, BCHE, CYP2D26, SLC27A4, MTTP	51	838	12504	2.63316	0.702981	0.183172	16.4294
GOTERM_CC_FAT	GO:0005792~microsome	4	5.7971	0.0331599	RDH7, CYP3A13, CYP2D26, IYD	51	176	12504	5.57219	0.905632	0.286249	29.4604
GOTERM_CC_FAT	GO:0044421~extracellular region part	8	11.5942	0.0331845	GM14851, AY761184, BMP1, DEFA22, DEFA21, DEFA20, APOC3, TGFBI, VNN1, GM15308	51	774	12504	2.53412	0.9058	0.255685	29.4789
GOTERM_CC_FAT	GO:0042598~vesicular fraction	4	5.7971	0.0360876	RDH7, CYP3A13, CYP2D26, IYD	51	182	12504	5.38849	0.923682	0.248641	31.6399
GOTERM_MF_FAT	GO:0008237~metallopeptidase activity	8	11.5942	3.81846e-06	ACE, BMP1, CNDP2, MEP1A, ACE2, MME, ENPEP, XPNPEP2	48	187	13288	11.8431	0.000595504	0.000595504	0.00459071
GOTERM_MF_FAT	GO:0008238~exopeptidase activity	5	7.24638	0.000106167	ACE, CNDP2, ACE2, ENPEP, XPNPEP2	48	70	13288	19.7738	0.0164265	0.00824728	0.127566
GOTERM_MF_FAT	GO:0070011~peptidase activity, acting on L-amino acid peptides	9	13.0435	0.00112561	ACE, BMP1, CNDP2, MEP1A, ACE2, MME, ENPEP, PRSS23, XPNPEP2	48	603	13288	4.13184	0.161125	0.0568827	1.34492
GOTERM_MF_FAT	GO:0015293~symporter activity	5	7.24638	0.00119222	SLC13A1, SLC10A2, SLC28A1, SLC6A19, SLC34A2	48	132	13288	10.4861	0.169807	0.0454586	1.42398
GOTERM_MF_FAT	GO:0008233~peptidase activity	9	13.0435	0.00147524	ACE, BMP1, CNDP2, MEP1A, ACE2, MME, ENPEP, PRSS23, XPNPEP2	48	629	13288	3.96105	0.205711	0.0450168	1.75928
GOTERM_MF_FAT	GO:0004180~carboxypeptidase activity	3	4.34783	0.00676405	ACE, CNDP2, ACE2	48	35	13288	23.7286	0.65312	0.16177	7.83577
GOTERM_MF_FAT	GO:0008289~lipid binding	6	8.69565	0.00719252	APOC3, RBP2, VNN1, FABP2, FABP6, MTTP	48	345	13288	4.81449	0.6757	0.148597	8.31263
GOTERM_MF_FAT	GO:0008241~peptidyl-dipeptidase activity	2	2.89855	0.0105744	ACE, ACE2	48	3	13288	184.556	0.809554	0.187223	11.9979
GOTERM_MF_FAT	GO:0015370~solute:sodium symporter activity	3	4.34783	0.0114796	SLC10A2, SLC28A1, SLC6A19	48	46	13288	18.0543	0.834895	0.181376	12.9609
GOTERM_MF_FAT	GO:0046906~tetrapyrrole binding	4	5.7971	0.016194	PXDN, CUBN, CYP3A13, CYP2D26	48	151	13288	7.33333	0.921679	0.224847	17.8225
GOTERM_MF_FAT	GO:0015294~solute:cation symporter activity	3	4.34783	0.0274444	SLC10A2, SLC28A1, SLC6A19	48	73	13288	11.3767	0.986979	0.326086	28.4352
GOTERM_MF_FAT	GO:0043169~cation binding	21	30.4348	0.0352457	PXDN, CUBN, BMP1, CYP3A13, CNDP2, EPHX2, MME, ENPEP, SLC3A1, SLC10A2, XPNPEP2, SLC34A2, ACE, OSR2, GATA5, MEP1A, ACE2, SLC13A1, CYP2D26, DPYD, MYLK	48	3885	13288	1.4964	0.996293	0.372784	35.0398
GOTERM_MF_FAT	GO:0043167~ion binding	21	30.4348	0.0399727	PXDN, CUBN, BMP1, CYP3A13, CNDP2, EPHX2, MME, ENPEP, SLC3A1, SLC10A2, XPNPEP2, SLC34A2, ACE, OSR2, GATA5, MEP1A, ACE2, SLC13A1, CYP2D26, DPYD, MYLK	48	3934	13288	1.47776	0.998277	0.387081	38.7647
GOTERM_MF_FAT	GO:0031402~sodium ion binding	3	4.34783	0.0513305	SLC13A1, SLC10A2, SLC34A2	48	103	13288	8.06311	0.999731	0.444102	46.9286
GOTERM_MF_FAT	GO:0046872~metal ion binding	20	28.9855	0.0609758	PXDN, BMP1, CUBN, CYP3A13, CNDP2, EPHX2, MME, ENPEP, SLC10A2, XPNPEP2, SLC34A2, ACE, OSR2, GATA5, MEP1A, ACE2, SLC13A1, CYP2D26, DPYD, MYLK	48	3850	13288	1.4381	0.999945	0.480197	53.0643
GOTERM_MF_FAT	GO:0004222~metalloendopeptidase activity	3	4.34783	0.0614319	BMP1, MEP1A, MME	48	114	13288	7.28509	0.999949	0.461059	53.3377
GOTERM_MF_FAT	GO:0019842~vitamin binding	3	4.34783	0.0681856	CUBN, PRLR, RBP2	48	121	13288	6.86364	0.999984	0.476939	57.2183
GOTERM_MF_FAT	GO:0015103~inorganic anion transmembrane transporter activity	2	2.89855	0.0815914	SLC13A1, SLC34A2	48	24	13288	23.0694	0.999998	0.521761	64.0587
GOTERM_MF_FAT	GO:0020037~heme binding	3	4.34783	0.091949	PXDN, CYP3A13, CYP2D26	48	144	13288	5.76736	1	0.547037	68.6401
GOTERM_MF_FAT	GO:0004177~aminopeptidase activity	2	2.89855	0.0945411	ENPEP, XPNPEP2	48	28	13288	19.7738	1	0.539132	69.6996
GOTERM_MF_FAT	GO:0004601~peroxidase activity	2	2.89855	0.0945411	PXDN, IYD	48	28	13288	19.7738	1	0.539132	69.6996
GOTERM_MF_FAT	GO:0016684~oxidoreductase activity, acting on peroxide as acceptor	2	2.89855	0.0945411	PXDN, IYD	48	28	13288	19.7738	1	0.539132	69.6996
INTERPRO	IPR006025:Peptidase M, neutral zinc metallopeptidases, zinc-binding site	6	8.69565	1.30364e-05	ACE, BMP1, MEP1A, ACE2, MME, ENPEP	63	87	17763	19.445	0.00244787	0.00244787	0.016173
INTERPRO	IPR016327:Alpha-defensin	4	5.7971	1.7882e-05	GM14851, AY761184, DEFA22, DEFA21, DEFA20, GM15308	63	15	17763	75.1873	0.0033562	0.00167951	0.0221837
INTERPRO	IPR002366:Defensin propeptide	4	5.7971	1.7882e-05	GM14851, AY761184, DEFA22, DEFA21, DEFA20, GM15308	63	15	17763	75.1873	0.0033562	0.00167951	0.0221837
INTERPRO	IPR006080:Mammalian defensin	3	4.34783	0.000773528	DEFA22, DEFA21, DEFA20, GM15308	63	12	17763	70.4881	0.135392	0.0473362	0.955485
INTERPRO	IPR000463:Cytosolic fatty-acid binding	3	4.34783	0.00122234	RBP2, FABP2, FABP6	63	15	17763	56.3905	0.205419	0.055864	1.50601
INTERPRO	IPR001855:Beta defensin	3	4.34783	0.00427389	DEFA22, DEFA21, DEFA20, GM15308	63	28	17763	30.2092	0.553007	0.148744	5.17521
INTERPRO	IPR001548:Peptidase M2, peptidyl-dipeptidase A	2	2.89855	0.0104353	ACE, ACE2	63	3	17763	187.968	0.860841	0.280134	12.2036
INTERPRO	IPR000566:Lipocalin-related protein and Bos/Can/Equ allergen	3	4.34783	0.0126869	RBP2, FABP2, FABP6	63	49	17763	17.2624	0.909318	0.290301	14.6502
INTERPRO	IPR001506:Peptidase M12A, astacin	2	2.89855	0.0207634	BMP1, MEP1A	63	6	17763	93.9841	0.980641	0.389256	22.9196
INTERPRO	IPR006209:EGF	3	4.34783	0.0736595	BMP1, CUBN, MEP1A	63	128	17763	6.60826	0.999999	0.797756	61.2985
INTERPRO	IPR006026:Peptidase, metallopeptidases	2	2.89855	0.0933301	BMP1, MEP1A	63	28	17763	20.1395	1	0.841494	70.3464
KEGG_PATHWAY	mmu04614:Renin-angiotensin system	4	5.7971	2.0544e-05	ACE, ACE2, MME, ENPEP	19	18	5738	67.1111	0.00055454	0.00055454	0.0170191
KEGG_PATHWAY	mmu03320:PPAR signaling pathway	4	5.7971	0.00176614	APOC3, FABP2, FABP6, SLC27A4	19	79	5738	15.2911	0.0466068	0.0235814	1.45383
KEGG_PATHWAY	mmu00770:Pantothenate and CoA biosynthesis	2	2.89855	0.0460904	VNN1, DPYD	19	15	5738	40.2667	0.720298	0.346019	32.3573
PIR_SUPERFAMILY	PIRSF001875:alpha-defensin	4	5.7971	3.79451e-05	GM14851, AY761184, DEFA22, DEFA21, DEFA20, GM15308	38	15	8136	57.0947	0.00147879	0.00147879	0.0345017
PIR_SUPERFAMILY	PIRSF500199:intracellular lipid-binding protein	3	4.34783	0.00152099	RBP2, FABP2, FABP6	38	13	8136	49.4089	0.0576359	0.0292456	1.37469
PIR_SUPERFAMILY	PIRSF002390:lipid binding protein, FABP type	3	4.34783	0.00152099	RBP2, FABP2, FABP6	38	13	8136	49.4089	0.0576359	0.0292456	1.37469
SMART	SM00048:DEFSN	3	4.34783	0.000505655	DEFA22, DEFA21, DEFA20, GM15308	27	12	9131	84.5463	0.015557	0.015557	0.433568
SMART	SM00235:ZnMc	2	2.89855	0.0768473	BMP1, MEP1A	27	28	9131	24.1561	0.916154	0.710439	49.6881
SMART	SM00408:IGc2	3	4.34783	0.0984488	PXDN, TMIGD1, MYLK	27	187	9131	5.42543	0.959756	0.65731	58.9485
SP_PIR_KEYWORDS	signal	29	42.029	8.83474e-08	PXDN, DEFA22, DEFA21, DEFA20, TMIGD1, SPINK3, AMN, REG3A, GM14851, ACE, BCHE, APOC3, TGFBI, VNN1, NPC1L1, PRAP1, GM15308, PNLIPRP2, BMP1, CUBN, LYZ1, IYD, ANKRD43, MTTP, AY761184, PRLR, ITPRIPL2, MEP1A, ACE2, PRSS23, SLC46A3	62	2970	17854	2.81181	1.2987e-05	1.2987e-05	0.000105133
SP_PIR_KEYWORDS	metalloprotease	7	10.1449	1.0343e-05	ACE, BMP1, CNDP2, MEP1A, ACE2, MME, ENPEP	62	146	17854	13.8067	0.00151928	0.000759929	0.0123074
SP_PIR_KEYWORDS	disulfide bond	22	31.8841	3.85745e-05	PXDN, PNLIPRP2, LYZ1, DEFA22, BMP1, CUBN, DEFA21, DEFA20, TMIGD1, MME, SPINK3, ENPEP, MTTP, SLC34A2, REG3A, ACE, PRLR, BCHE, TGFBI, MEP1A, ACE2, PRSS23, GM15308	62	2469	17854	2.56593	0.00565452	0.0018884	0.0458937
SP_PIR_KEYWORDS	Antimicrobial	5	7.24638	8.5278e-05	GM14851, AY761184, LYZ1, DEFA22, DEFA21, DEFA20, GM15308	62	68	17854	21.1741	0.0124581	0.00312919	0.101433
SP_PIR_KEYWORDS	Secreted	15	21.7391	0.000244454	PXDN, PNLIPRP2, DEFA22, DEFA21, DEFA20, SPINK3, REG3A, ACE, GM14851, AY761184, BCHE, TGFBI, APOC3, ACE2, PRAP1, PRSS23, GM15308	62	1420	17854	3.04191	0.035301	0.00716205	0.290511
SP_PIR_KEYWORDS	hydrolase	15	21.7391	0.00042902	SIS, BMP1, LYZ1, PNLIPRP2, CNDP2, EPHX2, MME, ENPEP, XPNPEP2, ACE, BCHE, ACE2, MEP1A, VNN1, PRSS23	62	1500	17854	2.87968	0.0611311	0.0104582	0.509338
SP_PIR_KEYWORDS	defensin	4	5.7971	0.000703181	GM14851, AY761184, DEFA22, DEFA21, DEFA20, GM15308	62	51	17854	22.5857	0.0982374	0.0146634	0.83358
SP_PIR_KEYWORDS	lipid metabolism	5	7.24638	0.00120104	MOGAT2, CUBN, NPC1L1, SLC27A4, MTTP	62	136	17854	10.587	0.161935	0.0218404	1.41991
SP_PIR_KEYWORDS	Protease	8	11.5942	0.0016934	ACE, BMP1, CNDP2, MEP1A, ACE2, MME, ENPEP, PRSS23	62	509	17854	4.52602	0.220529	0.0273026	1.99663
SP_PIR_KEYWORDS	transport	14	20.2899	0.00215464	OSTB, OSTA, CUBN, RBP2, SLC10A2, SLC6A19, SLC34A2, MTTP, SLC5A4B, APOC3, SLC13A1, FABP2, SLC27A4, FABP6	62	1571	17854	2.56623	0.271723	0.03121	2.53411
SP_PIR_KEYWORDS	cholesterol metabolism	3	4.34783	0.00469663	CUBN, NPC1L1, MTTP	62	30	17854	28.7968	0.499442	0.0609739	5.44809
SP_PIR_KEYWORDS	carboxypeptidase	3	4.34783	0.00533183	ACE, CNDP2, ACE2	62	32	17854	26.997	0.54428	0.0633913	6.16367
SP_PIR_KEYWORDS	Symport	4	5.7971	0.00616151	SLC13A1, SLC10A2, SLC6A19, SLC34A2	62	109	17854	10.5676	0.596889	0.0675017	7.09087
SP_PIR_KEYWORDS	Sodium transport	4	5.7971	0.00647894	SLC5A4B, SLC13A1, SLC10A2, SLC34A2	62	111	17854	10.3772	0.615381	0.0659733	7.44339
SP_PIR_KEYWORDS	glycoprotein	22	31.8841	0.00651616	PXDN, PNLIPRP2, CUBN, OSTA, BMP1, TMIGD1, MME, ENPEP, AMN, SLC10A2, SLC6A19, SLC34A2, ACE, PRLR, BCHE, MEP1A, ACE2, SLC13A1, VNN1, NPC1L1, PRSS23, SLC46A3	62	3600	17854	1.7598	0.617494	0.0620582	7.48464
SP_PIR_KEYWORDS	steroid metabolism	3	4.34783	0.0078444	CUBN, NPC1L1, MTTP	62	39	17854	22.1514	0.685784	0.069799	8.94584
SP_PIR_KEYWORDS	antibiotic	3	4.34783	0.0162449	DEFA22, DEFA21, DEFA20, GM15308	62	57	17854	15.1562	0.90997	0.132053	17.7084
SP_PIR_KEYWORDS	metal-binding	16	23.1884	0.0335674	PXDN, BMP1, CYP3A13, CNDP2, EPHX2, MME, ENPEP, XPNPEP2, ACE, OSR2, GATA5, MEP1A, ACE2, CYP2D26, DPYD, MYLK	62	2682	17854	1.71793	0.99339	0.243339	33.3894
SP_PIR_KEYWORDS	carboxylic ester hydrolase	2	2.89855	0.0336538	PNLIPRP2, BCHE	62	10	17854	57.5935	0.993476	0.232684	33.4603
SP_PIR_KEYWORDS	membrane	27	39.1304	0.0342036	OSTB, OSTA, TMIGD1, MME, ENPEP, AMN, SLC5A4B, ACE, VNN1, NPC1L1, MOGAT2, CUBN, CYP3A13, SLC10A2, SLC6A19, IYD, SLC34A2, LHFPL2, LRAT, PRLR, ITPRIPL2, MEP1A, ACE2, SLC13A1, CYP2D26, SLC46A3, SLC27A4	62	5507	17854	1.41186	0.994	0.2257	33.9094
SP_PIR_KEYWORDS	lipid-binding	3	4.34783	0.0387195	FABP2, FABP6, MTTP	62	91	17854	9.49344	0.996987	0.241508	37.4945
SP_PIR_KEYWORDS	oxidoreductase	6	8.69565	0.0454649	RDH7, PXDN, CYP3A13, CYP2D26, DPYD, IYD	62	572	17854	3.02064	0.99893	0.267221	42.5188
SP_PIR_KEYWORDS	microsome	3	4.34783	0.0459043	RDH7, CYP3A13, CYP2D26	62	100	17854	8.63903	0.999	0.259431	42.833
SP_PIR_KEYWORDS	Sodium	3	4.34783	0.0484006	SLC13A1, SLC10A2, SLC34A2	62	103	17854	8.38741	0.99932	0.262042	44.5877
SP_PIR_KEYWORDS	fmn	2	2.89855	0.0500605	DPYD, IYD	62	15	17854	38.3957	0.999474	0.260646	45.727
SP_PIR_KEYWORDS	Aminopeptidase	2	2.89855	0.0789048	ENPEP, XPNPEP2	62	24	17854	23.9973	0.999994	0.371677	62.3966
SP_PIR_KEYWORDS	endoplasmic reticulum	6	8.69565	0.0814628	MOGAT2, RDH7, LRAT, CYP3A13, CYP2D26, MTTP	62	678	17854	2.54839	0.999996	0.370375	63.6207
SP_PIR_KEYWORDS	heme	3	4.34783	0.0848512	PXDN, CYP3A13, CYP2D26	62	142	17854	6.08383	0.999998	0.372185	65.1859
SP_PIR_KEYWORDS	nadp	3	4.34783	0.0848512	RDH7, DPYD, IYD	62	142	17854	6.08383	0.999998	0.372185	65.1859
SP_PIR_KEYWORDS	alternative promoter usage	2	2.89855	0.0945553	MYLK, MTTP	62	29	17854	19.8598	1	0.395586	69.3338
SP_PIR_KEYWORDS	iron	4	5.7971	0.0969508	PXDN, CYP3A13, CYP2D26, DPYD	62	321	17854	3.58838	1	0.393283	70.2854
UP_SEQ_FEATURE	signal peptide	29	42.029	5.60127e-07	PXDN, DEFA22, DEFA21, DEFA20, TMIGD1, SPINK3, AMN, REG3A, GM14851, ACE, BCHE, APOC3, TGFBI, VNN1, NPC1L1, PRAP1, GM15308, PNLIPRP2, BMP1, CUBN, LYZ1, IYD, ANKRD43, MTTP, AY761184, PRLR, ITPRIPL2, MEP1A, ACE2, PRSS23, SLC46A3	61	2963	16021	2.57055	0.000142822	0.000142822	0.000729923
UP_SEQ_FEATURE	disulfide bond	20	28.9855	0.000765866	PXDN, PNLIPRP2, LYZ1, DEFA22, BMP1, CUBN, DEFA21, DEFA20, TMIGD1, MME, SPINK3, SLC34A2, REG3A, ACE, PRLR, BCHE, TGFBI, MEP1A, ACE2, PRSS23, GM15308	61	2379	16021	2.20798	0.17747	0.0930658	0.993447
UP_SEQ_FEATURE	metal ion-binding site:Zinc; catalytic	5	7.24638	0.000992171	BMP1, MEP1A, ACE2, MME, ENPEP	61	118	16021	11.1288	0.223633	0.0809148	1.28525
UP_SEQ_FEATURE	topological domain:Extracellular	16	23.1884	0.0124522	OSTB, TMIGD1, MME, ENPEP, AMN, SLC10A2, SLC6A19, IYD, SLC34A2, ACE, PRLR, ITPRIPL2, MEP1A, ACE2, NPC1L1, SLC46A3	61	2174	16021	1.93295	0.959044	0.550137	15.0654
UP_SEQ_FEATURE	glycosylation site:N-linked (GlcNAc...)	21	30.4348	0.022656	PXDN, PNLIPRP2, OSTA, BMP1, CUBN, TMIGD1, MME, ENPEP, AMN, SLC10A2, SLC6A19, SLC34A2, ACE, PRLR, BCHE, MEP1A, ACE2, SLC13A1, VNN1, PRSS23, SLC46A3	61	3444	16021	1.60146	0.997102	0.689244	25.8171
UP_SEQ_FEATURE	domain:CUB 5	2	2.89855	0.0259277	BMP1, CUBN	61	7	16021	75.0398	0.998768	0.672564	28.9888
UP_SEQ_FEATURE	domain:CUB 4	2	2.89855	0.0259277	BMP1, CUBN	61	7	16021	75.0398	0.998768	0.672564	28.9888
UP_SEQ_FEATURE	region of interest:Metalloprotease	2	2.89855	0.0332134	BMP1, MEP1A	61	9	16021	58.3643	0.999818	0.707843	35.6072
UP_SEQ_FEATURE	domain:CUB 3	2	2.89855	0.0440416	BMP1, CUBN	61	12	16021	43.7732	0.99999	0.762046	44.3978
UP_SEQ_FEATURE	metal ion-binding site:Iron (heme axial ligand)	3	4.34783	0.0530832	PXDN, CYP3A13, CYP2D26	61	99	16021	7.95877	0.999999	0.786777	50.8743
UP_SEQ_FEATURE	repeat:2-3	2	2.89855	0.0547505	GM14851, AY761184, MYLK	61	15	16021	35.0186	0.999999	0.762078	51.9896
UP_SEQ_FEATURE	domain:VWFC	2	2.89855	0.0618242	PXDN, AMN	61	17	16021	30.8987	1	0.772229	56.4664
UP_SEQ_FEATURE	transmembrane region	22	31.8841	0.0688597	OSTB, MOGAT2, OSTA, TMIGD1, MME, ENPEP, AMN, SLC10A2, SLC6A19, SLC34A2, IYD, LHFPL2, ACE, LRAT, PRLR, ITPRIPL2, MEP1A, SLC13A1, ACE2, NPC1L1, SLC46A3, SLC27A4	61	4113	16021	1.40483	1	0.780431	60.534
UP_SEQ_FEATURE	repeat:2-1	2	2.89855	0.0792814	GM14851, AY761184, MYLK	61	22	16021	23.8763	1	0.80215	65.9182
UP_SEQ_FEATURE	repeat:2-2	2	2.89855	0.0792814	GM14851, AY761184, MYLK	61	22	16021	23.8763	1	0.80215	65.9182
UP_SEQ_FEATURE	repeat:1-2	2	2.89855	0.0827343	GM14851, AY761184, MYLK	61	23	16021	22.8382	1	0.792568	67.5467
UP_SEQ_FEATURE	repeat:1-1	2	2.89855	0.0827343	GM14851, AY761184, MYLK	61	23	16021	22.8382	1	0.792568	67.5467
UP_SEQ_FEATURE	domain:Ig-like C2-type 1	3	4.34783	0.0853233	PXDN, TMIGD1, MYLK	61	130	16021	6.06091	1	0.780442	68.7203
UP_SEQ_FEATURE	topological domain:Cytoplasmic	16	23.1884	0.0854773	OSTB, TMIGD1, MME, ENPEP, AMN, SLC10A2, SLC6A19, IYD, SLC34A2, ACE, PRLR, ITPRIPL2, MEP1A, ACE2, NPC1L1, SLC46A3	61	2780	16021	1.51159	1	0.759266	68.7889
UP_SEQ_FEATURE	domain:Ig-like C2-type 2	3	4.34783	0.0864442	PXDN, TMIGD1, MYLK	61	131	16021	6.01464	1	0.742352	69.2162
UP_SEQ_FEATURE	binding site:Substrate; via carbonyl oxygen	2	2.89855	0.0930168	CNDP2, ACE2	61	26	16021	20.203	1	0.749203	71.9807

## Sheet: Cluster10
Table S4: Hierarchical clustering of genes differentially regulated in the presence or absence of microbiota; Cluster 10
Category	Term	Count	%	PValue	Genes	List Total	Pop Hits	Pop Total	Fold Enrichment	Bonferroni	Benjamini	FDR
GOTERM_BP_FAT	GO:0008610~lipid biosynthetic process	3	30	0.0112917	ALDH1A1, SCD1, APOA1	9	285	13588	15.8924	0.774092	0.774092	12.4032
GOTERM_BP_FAT	GO:0010817~regulation of hormone levels	2	20	0.0729404	ALDH1A1, APOA1	9	128	13588	23.5903	0.999951	0.75765	58.6543
GOTERM_BP_FAT	GO:0034754~cellular hormone metabolic process	2	20	0.030216	ALDH1A1, APOA1	9	52	13588	58.0684	0.982035	0.738096	30.0782
GOTERM_BP_FAT	GO:0042445~hormone metabolic process	2	20	0.0517887	ALDH1A1, APOA1	9	90	13588	33.5506	0.999057	0.824756	46.2124
GOTERM_BP_FAT	GO:0043086~negative regulation of catalytic activity	2	20	0.0579546	APOA1, ANGPTL4	9	101	13588	29.8966	0.999599	0.728417	50.1526
GOTERM_BP_FAT	GO:0044092~negative regulation of molecular function	2	20	0.0751427	APOA1, ANGPTL4	9	132	13588	22.8754	0.999964	0.721725	59.7853
GOTERM_BP_FAT	GO:0051346~negative regulation of hydrolase activity	2	20	0.0128827	APOA1, ANGPTL4	9	22	13588	137.253	0.817061	0.572287	14.033
GOTERM_BP_FAT	GO:0055114~oxidation reduction	3	30	0.0560787	ALDH1A1, SCD1, HSD17B13	9	672	13588	6.74008	0.999479	0.779546	48.9828
GOTERM_CC_FAT	GO:0005576~extracellular region	3	30	0.0898565	APOA1, HSD17B13, ANGPTL4	5	1680	12504	4.46571	0.676914	0.676914	45.4335
GOTERM_MF_FAT	GO:0004364~glutathione transferase activity	2	20	0.0136195	GSTA1, GM3776	8	26	13288	127.769	0.460487	0.460487	12.0993
GOTERM_MF_FAT	GO:0016765~transferase activity, transferring alkyl or aryl (other than methyl) groups	2	20	0.0275942	GSTA1, GM3776	8	53	13288	62.6792	0.716117	0.467194	23.1376
INTERPRO	IPR003080:Glutathione S-transferase, alpha class	2	20	0.00303661	GSTA1, GM3776	10	6	17763	592.1	0.11723	0.11723	2.75994
INTERPRO	IPR004045:Glutathione S-transferase, N-terminal	2	20	0.0136003	GSTA1, GM3776	10	27	17763	131.578	0.429612	0.24476	11.8401
INTERPRO	IPR004046:Glutathione S-transferase, C-terminal	2	20	0.0141008	GSTA1, GM3776	10	28	17763	126.879	0.441359	0.17641	12.2509
INTERPRO	IPR010987:Glutathione S-transferase, C-terminal-like	2	20	0.0151012	GSTA1, GM3776	10	30	17763	118.42	0.464135	0.144414	13.067
INTERPRO	IPR012335:Thioredoxin fold	2	20	0.0524544	GSTA1, GM3776	10	106	17763	33.5151	0.890199	0.308008	39.0943
INTERPRO	IPR017933:Glutathione S-transferase/chloride channel, C-terminal	2	20	0.0170993	GSTA1, GM3776	10	34	17763	104.488	0.506946	0.131882	14.6765
KEGG_PATHWAY	mmu03320:PPAR signaling pathway	3	30	0.00182211	SCD1, APOA1, ANGPTL4	6	79	5738	36.3165	0.01628	0.01628	1.0441
PIR_SUPERFAMILY	PIRSF000503:glutathione transferase	2	20	0.0139345	GSTA1, GM3776	7	19	8136	122.346	0.0935574	0.0935574	6.97876
SP_PIR_KEYWORDS	nad	2	20	0.0820534	ALDH1A1, HSD17B13	10	169	17854	21.129	0.987303	0.887321	56.3185
SP_PIR_KEYWORDS	oxidoreductase	3	30	0.0317697	ALDH1A1, SCD1, HSD17B13	10	572	17854	9.36399	0.807286	0.807286	26.8258
UP_SEQ_FEATURE	active site:Proton acceptor	3	30	0.0404516	ALDH1A1, HSD17B13, PRKG2	9	662	16021	8.06697	0.908825	0.698047	33.6903
UP_SEQ_FEATURE	nucleotide phosphate-binding region:NAD	2	20	0.0358838	ALDH1A1, HSD17B13	9	73	16021	48.7702	0.879911	0.879911	30.4819
