# Supplementary material for: Microbiota modulate transcription in the intestinal epithelium without remodeling the accessible chromatin landscape
Source: HighWire-hosted journal article supplement (doi:10.1101/gr.165845.113), 2014-06-24
Supplement: Supplemental_TableS5.xlsx [file Supplemental_TableS5.xlsx]

## Sheet: duodenum-specific
Table S5: Differential DHS along the length of the intestine; duodenum-specific
chrom	start	stop	duodenum_value	ileum_value	colon_value	feature	nearest_gene
chr1	10310285	10310696	131.1	24.99	19.16	intergenic	Cpa6
chr1	12864414	12864829	196.19	40.1	32.82	intronic	Slco5a1
chr1	15823461	15823711	87.31	15.96	19.93	exonic	Terf1
chr1	16300275	16300525	82.8	22.43	21.95	intronic	Stau2
chr1	23891867	23892117	94.58	24.23	27.31	intronic	Smap1
chr1	24130971	24131221	151.72	18.66	12.71	intergenic	Fam135a
chr1	34173315	34173565	134.28	34.77	32.02	intronic	Dst
chr1	35447281	35447531	223.16	38.5	60.15	intergenic	AK003327
chr1	35932118	35932567	339.05	81.54	54.84	intergenic	AK003327
chr1	37462713	37463363	373.25	74.05	53.25	intronic	Inpp4a
chr1	38011117	38011367	138.63	31.34	21.05	intronic	Lyg1
chr1	39072522	39072772	102.57	27.65	26.34	intergenic	Pdcl3
chr1	39159091	39159541	255.4	42.39	20.98	intergenic	Npas2
chr1	39240516	39240965	165.37	33.1	30.95	intergenic	Npas2
chr1	39491422	39491672	191.32	34.53	29.66	intronic	Tbc1d8
chr1	39572030	39572680	519.58	58.96	36.52	intergenic	D1Bwg0212e
chr1	43542062	43542507	176.56	41.88	29.61	intronic	Nck2
chr1	45966761	45967287	185.79	28.7	20.92	intronic	Slc40a1
chr1	51871760	51872203	449.85	79.76	108.11	intronic	Myo1b
chr1	52199638	52200084	268.53	65.94	60.71	promoter	Stat1
chr1	53381931	53382181	70.39	18.9	13.74	intronic	Osgepl1
chr1	54571807	54572057	54.23	6.26	4.52	intronic	Pgap1
chr1	54685223	54685673	165.43	41.97	37.71	intergenic	Ankrd44
chr1	55425881	55426322	137.48	24.52	14.16	intergenic	Boll
chr1	55740332	55740582	102.99	27.84	24.57	intronic	Plcl1
chr1	58364211	58364461	68.72	15.86	20.07	exonic	Aox3l1
chr1	59378936	59379186	250.22	68.31	44.41	intronic	Cdk15
chr1	59590238	59590488	77.36	21.3	20.6	intronic	AK006768
chr1	59632794	59633044	100.27	23.91	18.06	intronic	Gm973
chr1	59795780	59796030	99.95	21.99	15.44	intergenic	Bmpr2
chr1	59796374	59797218	553.79	118.24	117.69	intergenic	Bmpr2
chr1	60756231	60756481	85.45	28.38	14.6	intergenic	AK217854
chr1	60998781	60999224	282.45	47.11	29.48	intergenic	Ctla4
chr1	61654651	61654901	56.23	10.6	10.41	intergenic	Pard3b
chr1	61655033	61655283	63.82	13.28	13.98	intergenic	Pard3b
chr1	62088164	62088414	77.85	21.14	21.97	intronic	Pard3b
chr1	64144390	64144640	314.26	82.38	53.82	intronic	Klf7
chr1	64384441	64384891	447.85	95.69	61.07	intergenic	Creb1
chr1	66158198	66158448	90.75	20.81	14.31	intergenic	Mtap2
chr1	67034052	67034902	462.52	91.44	79.64	intergenic	Lancl1
chr1	71052561	71052992	263.15	25.33	27.81	intergenic	Bard1
chr1	71670246	71670696	242.6	47	41.71	exonic	Fn1
chr1	72711896	72712331	115.17	9.68	11.87	intronic	Ankar
chr1	72889107	72889357	111.46	19.92	12.52	intronic	Igfbp2
chr1	72889465	72889894	168.24	34.13	24.75	intronic	Igfbp2
chr1	73623719	73623969	98.34	23.57	28.32	intergenic	AK079660
chr1	74680254	74680504	129.76	29.42	29.89	intronic	Stk36
chr1	74732033	74732283	90	26.34	17.3	intronic	Ttll4
chr1	75095293	75095543	70.2	16.83	13.35	intronic	Nhej1
chr1	78529413	78529851	164.68	26.53	22.45	intronic	Mogat1
chr1	78931299	78931949	237.62	30.34	40.37	intergenic	Kcne4
chr1	79678680	79679130	255.84	35.45	33.36	intergenic	Ap1s3
chr1	80298192	80298442	71.6	12.75	10.92	intronic	Cul3
chr1	82889764	82890014	65.91	10.12	15.17	exonic	Agfg1
chr1	82943293	82943543	87.64	28.82	18.12	intergenic	Agfg1
chr1	83011890	83012140	105.6	29.49	27.34	intronic	Slc19a3
chr1	84125212	84125462	85.81	23.63	17.33	intronic	Pid1
chr1	84237823	84238073	76.12	23.59	10.71	intronic	Pid1
chr1	84238803	84239249	257.27	28.72	28.66	intronic	Pid1
chr1	84306750	84307000	83.94	25.22	17.63	intronic	Pid1
chr1	84336467	84336917	117.32	24.63	21.54	intronic	Pid1
chr1	88344140	88344390	204.34	49.49	27.19	intergenic	1700019O17Rik
chr1	89001536	89001962	153.03	24.6	16.61	intergenic	Alpi
chr1	90498457	90498707	177.91	33.7	35.56	intergenic	AK030268
chr1	91578574	91578824	221.7	54.16	26.22	intronic	4933400F21Rik
chr1	92833569	92833819	99.06	33.67	17.6	intronic	Mlph
chr1	92963293	92963543	168.11	36.63	20.92	intronic	Lrrfip1
chr1	96105157	96105872	242.1	62.99	35.24	intergenic	Pdcd1
chr1	96109180	96109430	88.23	18.36	18.67	intergenic	Pdcd1
chr1	99216401	99216651	94.35	8.98	16.94	intergenic	Slco6c1
chr1	99684163	99684525	74.19	11.18	20.26	intronic	Gin1
chr1	104457873	104458291	105.08	12.7	10.95	intergenic	AK076805
chr1	106858466	106858716	85.77	19.61	17.59	intronic	Cdh20
chr1	107590853	107591103	87.77	17.32	19.56	intronic	2310035C23Rik
chr1	108413717	108414152	253	35.64	63.48	intergenic	Bcl2
chr1	108414272	108414522	126.49	23.55	39.22	intergenic	Bcl2
chr1	109669544	109669954	158.26	30.59	17.38	intergenic	AK085943
chr1	120231996	120232446	237.03	39.62	37.5	intergenic	Mki67ip
chr1	120342914	120343164	102.73	24.01	19.3	intronic	Clasp1
chr1	127434239	127434489	88.52	13.82	6.41	intergenic	Slc35f5
chr1	127634208	127634640	171.03	27.47	24.05	intronic	Gpr39
chr1	127659207	127659630	134.05	29.05	29.59	intronic	Gpr39
chr1	129954007	129954422	185.14	30.32	38.75	intronic	Zranb3
chr1	129975129	129975379	60.84	12.21	11.15	intronic	Zranb3
chr1	129980241	129980491	91.47	19.27	8.53	intronic	Zranb3
chr1	130234267	130234707	338.08	57.76	33.99	exonic	Mcm6
chr1	131804953	131805441	192.59	38.6	24.84	intronic	Thsd7b
chr1	131865649	131866211	197.6	37.21	35.7	intronic	Thsd7b
chr1	132195816	132196066	87.44	17.28	23.3	intergenic	Thsd7b
chr1	132324003	132324253	105.38	30.1	24.69	intergenic	Daf2
chr1	132754324	132754719	178.89	60.39	30.34	intergenic	Pigr
chr1	132906963	132907213	99.75	23.49	19.78	intergenic	Il10
chr1	132941660	132941910	156.4	35.89	23.28	intergenic	Mapkapk2
chr1	132942260	132942510	126.39	37.27	22.58	intergenic	Mapkapk2
chr1	133104681	133104931	109.87	25.65	18.61	intronic	Rassf5
chr1	137242896	137243146	234.34	50.81	28.03	intronic	Lmod1
chr1	138900850	138901300	196.2	30.2	27.91	intergenic	Nr5a2
chr1	142163521	142163771	72.32	10.27	12.25	intronic	Kcnt2
chr1	151705445	151705851	201.4	19.6	20.87	intronic	Pla2g4a
chr1	152933841	152934091	70.23	16.75	13.51	intergenic	Hmcn1
chr1	152976082	152976332	82.67	26.01	13.85	intergenic	Hmcn1
chr1	155729855	155730278	195.05	35.48	24.29	intronic	5830403L16Rik
chr1	156029598	156029848	167.33	23.78	20.22	intergenic	AK019628
chr1	157229079	157229444	86.96	13.08	8.17	intronic	Xpr1
chr1	157346690	157346940	99.97	12.24	11.72	intergenic	AK147021
chr1	157474865	157475310	317.28	18.64	32.67	intronic	Acbd6
chr1	157483639	157484247	578.62	68.35	39.58	intronic	Acbd6
chr1	157484830	157485153	69.71	16.22	16.26	intronic	Acbd6
chr1	158313545	158313962	195.04	38.47	29.05	intronic	9430070O13Rik
chr1	159206836	159207086	76.77	11.74	9.46	intronic	Rasal2
chr1	159295522	159295918	115.85	26.96	35.51	intronic	Rasal2
chr1	161987387	161987637	86.98	20.12	20.03	intronic	4930523C07Rik
chr1	162456576	162456932	82.31	21.87	25.33	intronic	Rabgap1l
chr1	162827292	162827542	90.49	23.11	13.75	intergenic	Rc3h1
chr1	163326529	163326779	124.23	32.53	31.15	intronic	Tnfsf4
chr1	163840295	163840725	175.41	37.37	26.25	intergenic	AK135878
chr1	164462386	164462810	151.3	32.91	31.03	intergenic	Mettl13
chr1	166050416	166050862	345.36	77.8	58.59	intronic	Selp
chr1	166343133	166343383	97.65	13.12	24.6	intronic	Nme7
chr1	166461093	166461343	69.64	14.13	12.44	intergenic	Atp1b1
chr1	166523776	166524026	85.61	14.5	17.69	intergenic	Atp1b1
chr1	167772711	167772961	115.88	37.41	16.13	intronic	Cd247
chr1	169156069	169156507	153.32	48.81	29.91	exonic	Uck2
chr1	171665472	171665722	101.09	13.64	7.46	intergenic	Rgs4
chr1	172701699	172702148	190.3	38.45	46.79	intronic	Atf6
chr1	173484863	173485239	96.96	20.6	19.97	intergenic	Cd244
chr1	174191761	174192011	71.54	19.89	15.92	promoter	Igsf8
chr1	174582542	174582792	127.89	32.8	19.79	intergenic	Dusp23
chr1	174585616	174585866	84.92	20	16.36	intergenic	Dusp23
chr1	174636328	174636763	277.25	23.52	27	intergenic	Crp
chr1	174640062	174640497	365.16	63.49	59.61	intergenic	Crp
chr1	174919833	174920683	552.86	53.39	77.39	intergenic	Olfr16
chr1	174920833	174921083	69.81	12.78	20.88	intergenic	Olfr16
chr1	176197946	176198392	173.16	41.58	40.27	intergenic	Olfr419
chr1	177631360	177631808	192.36	33.67	37.9	intronic	Wdr64
chr1	177643640	177644240	247.61	34.4	53.07	intronic	Wdr64
chr1	178975142	178975392	72.92	20.09	15.36	intronic	Akt3
chr1	179456551	179456801	131.4	33.75	12.09	intergenic	AK156859
chr1	180984814	180985244	413.71	63.43	35.55	intronic	Smyd3
chr1	182065114	182065514	222.5	42.39	33.01	intronic	Cdc42bpa
chr1	184179314	184179564	84.86	19.69	15.05	intergenic	Degs1
chr1	184205293	184205543	92.88	19.07	8.64	intergenic	Degs1
chr1	185586120	185586525	242.53	15.53	18.19	intergenic	1700056E22Rik
chr1	185603971	185604221	126.81	24.82	24.1	intergenic	1700056E22Rik
chr1	185643700	185643950	80.57	23.58	12.66	intergenic	1700056E22Rik
chr1	187299916	187300166	113.95	22.35	12.59	intergenic	Slc30a10
chr1	187411413	187412399	473.64	109.55	74.12	intergenic	5033404E19Rik
chr1	189426550	189426999	150.91	36.17	26.72	intergenic	Esrrg
chr1	189632401	189632651	166.51	48.55	26.55	intronic	Esrrg
chr1	189696245	189696495	133.46	29.36	31.26	intronic	Esrrg
chr1	189696611	189696861	82.54	19.66	18.41	intronic	Esrrg
chr1	192867251	192867501	195.27	45.9	17.2	intergenic	1700022P22Rik
chr1	193927903	193928267	154.82	38.88	33.77	intronic	Rcor3
chr1	194281889	194282139	231.07	40.06	41.19	intronic	Kcnh1
chr1	194495085	194495335	132.35	28.96	19.47	intronic	Hhat
chr1	194909209	194909845	763.99	117.95	142.2	intergenic	AA408296
chr10	3147927	3148365	148.12	41.25	18.6	intronic	Cnksr3
chr10	5877512	5877962	256.21	32	22.75	intergenic	1700052N19Rik
chr10	6784670	6785107	169.36	31.57	28.52	intergenic	Iyd
chr10	8526839	8527246	115.56	26.51	27.96	intronic	Sash1
chr10	8528195	8528445	123.44	25.84	18.45	intronic	Sash1
chr10	9419177	9419427	111.85	16.59	28.93	intergenic	AK139890
chr10	9426138	9426554	191.64	47.18	23.36	intergenic	AK139890
chr10	9549568	9549818	81.19	21.91	20.69	intronic	Stxbp5
chr10	12421457	12421707	62.58	12.37	12.92	intronic	Utrn
chr10	12424234	12424664	235.79	59.34	47.49	intronic	Utrn
chr10	12701425	12701675	107.31	29.82	22.93	intergenic	Stx11
chr10	12960300	12960745	197.56	39.89	32.06	intronic	Phactr2
chr10	13666570	13666977	139.25	15.11	24.47	intergenic	Hivep2
chr10	13733401	13733651	111.17	38.17	20.11	intronic	Hivep2
chr10	14716216	14716466	95.92	32.82	15	intergenic	Nmbr
chr10	16484275	16484525	68.66	14.07	10.23	intergenic	AK029503
chr10	16884594	16885015	152.51	24.36	16.66	intergenic	AK029503
chr10	17140390	17140806	202.73	21.32	14.08	intergenic	Cited2
chr10	17320640	17320890	195.34	54.96	33.73	intergenic	Cited2
chr10	17554660	17555091	329.02	34.1	28.55	intronic	Txlnb
chr10	18135774	18136024	74.06	18.4	12.98	intronic	Nhsl1
chr10	19278728	19279212	147.53	32.05	26.39	intergenic	Ifngr1
chr10	19362718	19363119	160.49	30.41	19.68	intergenic	Il22ra2
chr10	19573326	19573576	133.6	13.15	12.19	intergenic	Slc35d3
chr10	19763935	19764185	94.45	23.59	25.76	intronic	Map3k5
chr10	19790350	19790800	414.38	68.63	55.7	intronic	Map3k5
chr10	19791150	19791600	232.29	55.68	43.85	intronic	Map3k5
chr10	20233640	20234079	251.8	54.58	35.45	intronic	Pde7b
chr10	20309452	20310086	174.4	26.93	27.46	intronic	Pde7b
chr10	20747505	20747755	87.48	26.01	18.25	intronic	Ahi1
chr10	21115020	21115604	352.36	72.89	63.19	exonic	Aldh8a1
chr10	21133719	21133969	248.26	35.04	19.19	intergenic	AK006189
chr10	21342433	21342683	62.15	18.66	11.29	intergenic	1700020N01Rik
chr10	21552153	21552701	243.02	36.96	38.1	intergenic	Sgk1
chr10	21695305	21695555	217.99	51.67	26.43	intronic	Sgk1
chr10	23800597	23801017	102.53	28.02	26.72	intergenic	Taar8a
chr10	23937876	23938126	98.51	29.37	13.9	intergenic	Moxd1
chr10	24625721	24625971	85.58	18.06	24.33	exonic	Med23
chr10	24791438	24791865	158.85	29.16	36.15	intergenic	Akap7
chr10	24864010	24864260	155.39	38.16	21.76	intergenic	Akap7
chr10	25103686	25104268	241.75	35.75	36.1	intronic	Epb4.1l2
chr10	25191110	25191360	115.62	25.23	32.55	exonic	Epb4.1l2
chr10	25315677	25316263	349.82	50.24	28.64	intergenic	2010003K15Rik
chr10	25319657	25320057	98.24	24.69	20.27	intergenic	2010003K15Rik
chr10	25672683	25672933	168.06	26	15.03	intergenic	Tmem200a
chr10	25679231	25679656	171.89	36.58	28.58	intergenic	Tmem200a
chr10	26213456	26213706	52.89	8.6	10.64	intergenic	L3mbtl3
chr10	30422415	30422796	140.19	21.92	29.78	intronic	Ncoa7
chr10	34309574	34309824	100.76	28.58	18.94	intronic	Frk
chr10	34333613	34333863	171.41	16.43	24.42	intergenic	Frk
chr10	36274827	36275077	63.29	10.37	11.35	intronic	Hs3st5
chr10	37011873	37012123	120.56	35	20.03	intergenic	AK040320
chr10	37013242	37013600	86.46	20.38	25.11	intergenic	AK040320
chr10	39174656	39174906	86.86	20.24	15.57	exonic	Fyn
chr10	39562191	39562607	135.72	36.47	22.75	exonic	Rev3l
chr10	40512671	40513088	133.4	33.56	23.75	intronic	9030224M15Rik
chr10	40779771	40780201	221.95	43.41	31.56	intergenic	Gpr6
chr10	40954526	40954776	73.04	16.46	20.82	intronic	Fig4
chr10	41336491	41336906	228.85	52.23	41.5	intergenic	Ccdc162
chr10	41374468	41374718	78.02	12.08	15.54	intergenic	Cep57l1
chr10	41543741	41543991	78.41	24.09	17.63	intronic	Sesn1
chr10	41544505	41544755	61.69	10.72	13.87	intronic	Sesn1
chr10	43159919	43160169	202.28	46.97	44.68	exonic	Pdss2
chr10	44099883	44100133	125.41	23.99	20.07	intergenic	Atg5
chr10	44582531	44582781	85.35	19.79	24.51	intergenic	Prep
chr10	44734273	44734523	74.71	22.17	17.17	intergenic	Prep
chr10	44849726	44849976	124.52	27.6	16.22	intronic	Prep
chr10	51429701	51429951	82.08	10.72	25.48	intronic	Rfx6
chr10	53646161	53646411	161.11	25.71	26.72	intronic	Man1a
chr10	53726734	53726984	74.19	20.17	13.82	intronic	Man1a
chr10	55901490	55901940	210.59	33.98	46.26	intronic	D630037F22Rik
chr10	58002570	58003019	198.65	42.59	27.22	intronic	Ccdc138
chr10	58003565	58003815	94.71	9.61	14.39	exonic	Ccdc138
chr10	59062847	59063097	129.83	43.01	20.62	intronic	Ccdc109a
chr10	59544856	59545106	118.15	29.26	24.9	intronic	Ascc1
chr10	59791612	59792042	232.56	63.17	34.87	intronic	Cdh23
chr10	61103119	61103369	77.59	18.95	19.56	intergenic	Ppa1
chr10	61885946	61886196	87.48	20.68	19.28	promoter	Hkdc1
chr10	62292062	62292312	72.49	18.79	9.68	intronic	Tet1
chr10	66393155	66393580	186.63	38.82	20.54	intergenic	AK079018
chr10	66617584	66617834	92.84	33.82	14.51	intronic	Jmjd1c
chr10	67732361	67732798	118.9	26.48	11.4	intronic	Arid5b
chr10	68335080	68335330	62.51	14.75	10.71	intergenic	Tmem26
chr10	69613987	69614237	123.32	23.59	21.21	intronic	Ccdc6
chr10	69656636	69656886	170.34	26.28	13.11	intergenic	Ccdc6
chr10	69687277	69687527	166.64	37.43	44.04	intergenic	AK009351
chr10	69689854	69690293	185.72	42.44	51.55	intergenic	AK009351
chr10	75405434	75405859	208.73	46.66	32.52	intergenic	AK144847
chr10	75464296	75464746	296.47	35.01	25.27	intronic	Gm5134
chr10	75717379	75717629	71.08	20.2	12.86	intronic	S100b
chr10	75794132	75794382	104.14	34.7	16.12	intronic	Dip2a
chr10	76304951	76305201	92.84	21.97	12.93	intronic	Pcbp3
chr10	77433842	77434092	81.16	19.23	18.89	promoter	Trpm2
chr10	77721621	77721871	132.55	19.48	11.58	intergenic	Agpat3
chr10	82938692	82938942	80.6	19.64	24.66	promoter	AB349855
chr10	82943611	82943861	86.17	23.29	10.71	intergenic	AB349855
chr10	83036369	83036619	69.21	21.23	11.42	exonic	A230046K03Rik
chr10	83036683	83037090	222.34	52.05	26.86	intronic	A230046K03Rik
chr10	83406612	83406862	105.44	23.21	22.3	intergenic	AK082148
chr10	84355742	84355992	80.48	20.06	21.13	intronic	Rfx4
chr10	85360600	85360850	94.94	20.15	17.52	intronic	Prdm4
chr10	86277050	86277500	183.49	36.86	40.82	intronic	Nt5dc3
chr10	87985585	87985996	263.01	20.43	18.96	exonic	Mybpc1
chr10	87986068	87986318	59.99	13.52	9.82	intronic	Mybpc1
chr10	88895372	88895982	254.25	61.21	32.62	intronic	Gas2l3
chr10	92664682	92664932	107.74	26.65	19.03	intronic	Cdk17
chr10	92665082	92665332	66.99	13.88	13.27	intronic	Cdk17
chr10	93685136	93685386	152.86	29.74	22.5	intergenic	Ndufa12
chr10	93685688	93685938	117.33	25.09	21.92	intergenic	Ndufa12
chr10	93712297	93712737	386.49	102.19	62.42	intergenic	Ndufa12
chr10	93952022	93952672	528.13	85.63	65.38	intergenic	Tmcc3
chr10	94744124	94744374	100.15	23.49	16.13	intronic	Cradd
chr10	94893039	94893289	90.88	16.66	22.19	intergenic	AK017586
chr10	96498258	96498508	96.05	20.02	29.62	intergenic	Btg1
chr10	98087610	98088013	193.77	33.64	32.35	intergenic	Atp2b1
chr10	98526477	98526917	336.82	61.03	50.36	intergenic	Atp2b1
chr10	99120854	99121104	59.73	13.17	10.47	intergenic	AK039362
chr10	99550435	99550841	105.35	24.68	29.57	exonic	Kitl
chr10	99726679	99727045	131.13	38.75	23.19	intergenic	Gm4301
chr10	104657524	104657929	138.3	36.02	35.39	intronic	Tmtc2
chr10	105282504	105282754	56.36	6.51	5.21	exonic	Ccdc59
chr10	110248177	110248803	310.81	70.36	69.63	intronic	AK006160
chr10	110974280	110974896	184.77	31.71	26.53	intergenic	Phlda1
chr10	112239507	112239957	148.09	40.8	27.19	intergenic	AK005834
chr10	116167930	116168367	143.25	43.21	36.29	promoter	AK006570
chr10	116612001	116612251	102.01	24.61	20.83	intergenic	AK015188
chr10	117321536	117321786	118.53	27.35	25.74	intergenic	Rap1b
chr10	118283667	118283917	127.3	29.78	16.72	intergenic	Dyrk2
chr10	118284027	118284457	305.86	53.05	30.35	intergenic	Dyrk2
chr10	118558587	118559037	343.72	45.79	44.34	intergenic	Cand1
chr10	126670689	126670939	86.53	24.91	17.78	exonic	Kif5a
chr10	128441056	128441497	196.71	47.18	40.79	intergenic	Olfr763
chr10	129809554	129810190	334.56	64.75	39.86	intergenic	5830405N20Rik
chr11	3457940	3458369	123.05	43.6	25.84	intergenic	Smtn
chr11	3908706	3908956	135.56	41.1	26.39	intergenic	Gal3st1
chr11	4346283	4346857	222.35	37.65	39.81	intergenic	Hormad2
chr11	5852385	5852835	162.62	43.4	37.44	intergenic	Gck
chr11	6086804	6087254	180.55	39.58	35.62	intronic	Nudcd3
chr11	6333542	6333792	87.18	19.17	12.71	exonic	H2afv
chr11	11744533	11744783	99.62	23.79	29.63	intronic	Ddc
chr11	11750987	11751613	353.91	52.12	45.13	intronic	Ddc
chr11	11829885	11830135	101.55	25.65	14.63	intergenic	Grb10
chr11	20092204	20092620	96.87	27.42	15.8	intergenic	Rab1
chr11	20096756	20097006	65.94	12.08	14.8	intergenic	Rab1
chr11	20480818	20481251	221.38	39.61	37.96	intronic	Sertad2
chr11	21156743	21157193	140.33	16.71	18.77	intronic	Vps54
chr11	22031634	22031884	62.54	10.44	12.81	intronic	Ehbp1
chr11	22276004	22276446	141.24	19.95	28.62	intergenic	Ehbp1
chr11	22682533	22683181	601.79	95.06	137.89	intergenic	AK078949
chr11	23359660	23360054	244.39	57.02	32	intronic	Usp34
chr11	24354572	24355016	104.85	31.4	26.68	intronic	AK148130
chr11	24440371	24440621	79.79	23.99	12.26	intronic	AK148130
chr11	30900523	30900773	68.46	14.7	17.65	intronic	Asb3
chr11	31677092	31677510	144.35	19.72	20.49	intergenic	AK158188
chr11	32050245	32050883	245.16	48.47	32.96	intergenic	Il9r
chr11	32581260	32581510	88.2	19.71	20.54	intronic	Fbxw11
chr11	35549233	35549483	76.22	18.06	13.12	intergenic	Slit3
chr11	40006964	40007340	142.2	28.93	26.54	intergenic	Mat2b
chr11	40151730	40152100	110.19	30.09	30.25	intergenic	Mat2b
chr11	40242420	40242670	160.56	23.45	21.28	intergenic	Mat2b
chr11	40242969	40243402	268.9	64.94	31	intergenic	Mat2b
chr11	40270163	40270413	69.48	17.09	12.51	intergenic	Mat2b
chr11	42836577	42837014	166.61	39.85	23.51	intergenic	Atp10b
chr11	42880630	42880993	90.2	23.53	19.37	intergenic	Atp10b
chr11	51545620	51545870	82.25	16.51	12.4	intronic	Sec24a
chr11	51741517	51741767	72.16	18.79	11.54	intergenic	Cdkn2aipnl
chr11	53605047	53605297	91.27	24.17	9.54	intronic	Gm12216
chr11	54014968	54015218	92.39	18.92	19.84	intergenic	Csf2
chr11	54123013	54123647	416.99	100.04	84.17	intronic	Acsl6
chr11	54128546	54128796	157.48	38.43	37.23	exonic	Acsl6
chr11	54143976	54144410	392.77	75.2	42.54	intronic	Acsl6
chr11	55247579	55247995	182.87	41.26	22.72	intergenic	Atox1
chr11	55810612	55811026	178.46	34.92	32.16	intergenic	Nmur2
chr11	55909668	55910318	424	99.95	59.98	intergenic	Nmur2
chr11	55929246	55929664	193.9	42.78	21.39	intergenic	Nmur2
chr11	57402744	57403194	180.94	15.57	24.81	intergenic	AK016898
chr11	57482702	57482952	122.62	20.96	17.86	intronic	Galnt10
chr11	57941027	57941434	139.87	22.62	22.75	intronic	Gemin5
chr11	58007297	58007547	121.05	20.36	19.03	intergenic	Gm12250
chr11	58384070	58384320	81.59	23.7	18.75	intergenic	Olfr224
chr11	58390020	58390448	248.36	61.13	37.95	intergenic	Olfr325
chr11	58392682	58393052	165.96	42.46	48.47	promoter	Olfr325
chr11	58692174	58692548	132.34	31.91	30.18	exonic	2810021J22Rik
chr11	59878145	59878545	152.14	33.23	19.82	intergenic	Pemt
chr11	60830075	60830325	122.66	20.89	24.82	intergenic	Kcnj12
chr11	61546077	61546527	218.44	47.98	42.96	intronic	Prpsap2
chr11	61675818	61676068	76.74	17.12	20.21	intergenic	AK040705
chr11	61853816	61854266	167.29	10.63	11.72	intronic	Specc1
chr11	61916829	61917079	128.19	28	20.8	intronic	Specc1
chr11	61975763	61976192	99.95	20.4	20.4	intronic	Specc1
chr11	62222993	62223430	231.73	45.73	30.05	intronic	Ncor1
chr11	68354216	68354466	121.32	23.37	20.12	intronic	Pik3r6
chr11	68578098	68578526	128.48	32.17	19.06	intronic	Myh10
chr11	68601711	68602120	117	21.37	14.54	intronic	Myh10
chr11	69103362	69103612	85.51	18.75	12.04	intergenic	Cntrob
chr11	70526761	70527211	164.97	40.64	32.56	intronic	Kif1c
chr11	72237266	72237673	179.11	34.88	22.79	intergenic	Ggt6
chr11	74498763	74499213	177.7	39.28	21.36	intronic	Pafah1b1
chr11	75623993	75624243	231.99	43.47	20.73	intergenic	Doc2b
chr11	76260070	76260320	168.15	31.97	26.91	intronic	Abr
chr11	78102660	78103310	368.27	78.29	55.76	promoter	BC048862
chr11	78281025	78281475	206.08	42.47	43.28	intronic	Slc46a1
chr11	78531173	78531423	95.53	31.3	17.24	intronic	AK136065
chr11	78638640	78639090	193.54	47.25	29.5	promoter	1810012P15Rik
chr11	79929094	79929544	126.55	37.12	24.68	intronic	Atad5
chr11	80483338	80483588	189.58	19.72	19.26	intronic	Myo1d
chr11	80670387	80670637	76.02	14.79	15.43	promoter	Spaca3
chr11	80739463	80739713	147.17	41.61	30.86	intronic	Accn1
chr11	82121333	82121763	283.52	55.44	53.01	intergenic	Tmem132e
chr11	83413798	83414048	170.04	31.69	19.12	intronic	E230016K23Rik
chr11	83455600	83456050	240.18	29.21	31.29	intergenic	Ccl3
chr11	83458064	83458314	194.23	38.51	19.5	intergenic	Ccl3
chr11	84186623	84187055	314.68	35.8	29.3	intronic	Acaca
chr11	84350882	84351330	174.14	41.69	37.77	intergenic	AK018772
chr11	84416122	84416372	303.87	72.89	53.7	intergenic	AK018772
chr11	84920885	84921135	86.82	17.12	21.06	intronic	Usp32
chr11	85054420	85054670	88.23	19.45	8.96	intergenic	D630032N06Rik
chr11	85120120	85120370	130.05	28.33	20.74	intergenic	Ppm1d
chr11	86265340	86265790	218.65	34.65	34.21	intergenic	Rnft1
chr11	86685743	86685993	72.91	14.92	16.15	intergenic	Ypel2
chr11	86780704	86780954	171.03	48.46	33.37	intronic	Ypel2
chr11	87123219	87123469	154.5	42.88	32.98	intronic	Ppm1e
chr11	87549133	87549583	227.81	65.21	43.29	promoter	Supt4h1
chr11	88093695	88093945	73.86	10.18	6.86	intergenic	1700106J16Rik
chr11	88499748	88499998	134.15	30.86	22.73	intronic	Msi2
chr11	90866745	90867161	228.69	40.9	35.71	intergenic	AK147079
chr11	93228964	93229414	240.86	42.91	42.83	intronic	Car10
chr11	93476189	93476439	194.29	36.06	42.82	intergenic	Car10
chr11	93502284	93502534	108.19	14.34	21.83	intergenic	Car10
chr11	93519175	93519581	135.62	27.35	31.95	intergenic	Car10
chr11	94765946	94766196	77.4	16.38	8.25	intronic	AK079763
chr11	95311573	95311823	69.97	19.24	13.5	intronic	Spop
chr11	97698462	97698712	218.65	48.4	41.19	exonic	Lasp1
chr11	99483426	99483676	95.99	21.66	13.43	intergenic	Krtap4-1
chr11	99498671	99499086	166.38	36.66	38.09	intergenic	Krtap4-2
chr11	99618341	99618591	59.7	11.29	14.56	intergenic	Gm11595
chr11	99736938	99737339	182.62	42.61	35.36	intergenic	Krtap9-1
chr11	99943052	99943302	173.98	26.37	13.31	intronic	AK028798
chr11	100036035	100036475	239.43	56.34	51.55	intergenic	Krt9
chr11	103184409	103184659	65.97	19.38	7.75	intergenic	Arhgap27
chr11	103545685	103545935	65.13	18.42	10.13	intronic	Gosr2
chr11	103677336	103677786	236.25	51.69	60.78	exonic	Wnt3
chr11	106288519	106288881	118.89	31.26	23.23	intronic	Ern1
chr11	106818275	106818725	382.37	104.52	69.38	intergenic	Kpna2
chr11	109331879	109332129	125.56	16.75	23.56	intronic	Slc16a6
chr11	109364215	109364465	137.78	32.22	25.73	intronic	Arsg
chr11	109418757	109419159	174.57	47.46	26.2	intronic	Arsg
chr11	109603093	109603343	90.16	17.78	30.43	intergenic	Fam20a
chr11	111460705	111461289	202.29	34.76	40.62	intergenic	Kcnj2
chr11	113216890	113217140	129.24	29.84	29.63	intronic	Slc39a11
chr11	115918816	115919066	179.05	49.27	27.67	intronic	Unk
chr11	118588611	118588861	133.26	24.43	16.89	intronic	Rbfox3
chr11	121144248	121144693	141.57	27.26	30.81	intronic	Foxk2
chr12	4046028	4046473	300.03	68.27	27.08	intergenic	Efr3b
chr12	7964734	7964984	74.75	15.04	6.93	intergenic	AK146888
chr12	10343928	10344178	112.45	30.3	21.2	intergenic	Nt5c1b
chr12	10344328	10344778	216.28	47.42	54.39	intergenic	Nt5c1b
chr12	11207570	11207989	248.49	41.33	39.78	intergenic	AK020565
chr12	12523760	12524328	292.01	73.74	46.33	intergenic	Fam49a
chr12	17342216	17342466	83.52	16.39	11.83	intergenic	Atp6v1c2
chr12	17650980	17651230	204.11	17.79	16.53	intergenic	Hpcal1
chr12	17749563	17750213	365.06	105.13	60.43	intronic	Hpcal1
chr12	25540992	25541242	117.03	31.4	15.79	intronic	Mboat2
chr12	30420069	30420319	102.96	14.14	10.7	intronic	Myt1l
chr12	32212159	32212593	213.21	48.35	49.46	intronic	Slc26a4
chr12	32378028	32378616	176.72	19.1	21.42	intronic	Cog5
chr12	33313500	33313750	128.12	39.35	21.89	intergenic	Nampt
chr12	36788492	36788920	183.75	34.48	31.46	intergenic	Tspan13
chr12	37090572	37090979	160.78	18.89	24.46	intergenic	Ispd
chr12	37543224	37543474	99.03	18.01	21.73	intergenic	Ispd
chr12	37544706	37545156	163.53	40.62	24.82	intergenic	Ispd
chr12	40502613	40503018	425.03	51.48	34.68	intergenic	Arl4a
chr12	40934138	40934565	97	20.28	12.03	intronic	Ifrd1
chr12	41235348	41235790	108.92	24.24	26.15	intronic	Dock4
chr12	41264389	41264639	140.26	39.52	21.16	intronic	Dock4
chr12	41289083	41289498	248.35	45.17	27.87	intronic	Dock4
chr12	41295770	41296206	251.59	54.86	41.22	intronic	Dock4
chr12	41418439	41418889	182.75	22.23	15.15	intronic	Dock4
chr12	41862241	41862631	105.51	17.99	24.51	intronic	Immp2l
chr12	42239341	42239591	84.11	17.98	8.72	intronic	Immp2l
chr12	46097880	46098330	141.15	31.43	28.8	intronic	Stxbp6
chr12	51378997	51379247	77.79	13.58	5.61	intergenic	Prkd1
chr12	51674984	51675411	94.12	19.7	21.24	intronic	Prkd1
chr12	52101168	52101818	298.23	69.33	36.92	intronic	AK131776
chr12	52149500	52149750	109.99	34.9	18.65	intergenic	AK131776
chr12	52206529	52206779	79.95	17.45	14.33	intergenic	AK131776
chr12	52297864	52298114	182.51	36.17	28.57	intergenic	G2e3
chr12	52338166	52338416	63.75	12.05	11.74	intergenic	G2e3
chr12	52346827	52347077	65.72	8.55	7.98	intergenic	G2e3
chr12	52379498	52379748	81.49	16.88	25.41	intergenic	G2e3
chr12	57775165	57775415	56.75	10.05	16.87	intergenic	Pax9
chr12	59639212	59639609	112.78	39.45	24.51	intergenic	Clec14a
chr12	59715628	59715878	60.9	12.51	8.37	intergenic	Sec23a
chr12	59716028	59716278	77.56	12.41	12.06	intergenic	Sec23a
chr12	60225890	60226325	100.44	18.5	24.62	intergenic	Ctage5
chr12	66351141	66351391	101.42	18.89	22.99	intergenic	Wdr20b
chr12	73929970	73930419	468.85	69.64	50.34	intergenic	Ppm1a
chr12	73930965	73931215	63.85	12.99	9.51	intergenic	Ppm1a
chr12	75044331	75044815	128.91	15.17	17.32	intronic	AK048798
chr12	76581131	76581381	152.15	31.74	27.81	intronic	Ppp2r5e
chr12	77195238	77195488	126.16	31.06	26.74	intronic	Syne2
chr12	77571049	77571299	105.05	18.38	9.21	intergenic	Gm10451
chr12	78256836	78257086	129.14	21.77	28.2	intergenic	Fut8
chr12	79087586	79088030	290.89	31.25	26.17	intergenic	Gphn
chr12	80040317	80040967	450.17	104.48	89	intergenic	Tmem229b
chr12	80070065	80070315	153.39	30.18	22.53	intronic	Tmem229b
chr12	80072208	80072458	138.56	31.9	13.06	intronic	Tmem229b
chr12	80077942	80078382	159.21	30.35	36.66	intronic	Tmem229b
chr12	80540422	80540841	223.75	32.74	28.14	intronic	Rad51l1
chr12	80793519	80793969	317.93	59.25	33.29	intronic	Rad51l1
chr12	81091211	81091461	77.24	15	8.07	intergenic	AK020496
chr12	81379854	81380291	213.41	30.31	32.46	intergenic	Actn1
chr12	82134680	82135530	889.49	79.54	104	intronic	Smoc1
chr12	82289242	82289674	154.6	34.08	24.45	intergenic	Smoc1
chr12	82301888	82302138	138.5	27.67	25.33	intronic	Slc8a3
chr12	82335486	82335865	134.86	29.51	17.34	intronic	AK046721
chr12	82380461	82381284	406.2	75.73	61.12	intronic	Slc8a3
chr12	82391739	82391989	76.94	18.61	19.09	intronic	Slc8a3
chr12	82417397	82417647	134.57	24.97	20.8	intronic	Slc8a3
chr12	82937836	82938086	57.31	12.21	8.01	intergenic	Pcnx
chr12	83990791	83991200	90.29	17.97	15.42	intronic	Rgs6
chr12	84654636	84655116	109.47	13.43	20.91	intronic	Dpf3
chr12	85425567	85425817	105.54	31.4	20.68	intergenic	Acot5
chr12	85976218	85976468	124.85	36.98	19.13	intergenic	Vrtn
chr12	86981805	86982252	331.95	70.5	62.89	intergenic	Jdp2
chr12	90752141	90752529	182.85	32.29	60.37	intronic	Nrxn3
chr12	90957641	90958079	240.11	43.06	29.32	intronic	Nrxn3
chr12	91050443	91051293	1105.01	224.06	179.85	promoter	Nrxn3
chr12	91176018	91176622	292.83	60.77	42.2	intronic	Nrxn3
chr12	91536529	91536779	86.59	19.83	9.82	intronic	Nrxn3
chr12	92494779	92495172	141.54	39.4	31.05	intronic	4930534B04Rik
chr12	92800108	92800538	139.74	9.48	14.52	intronic	Gtf2a1
chr12	92991363	92991613	161.34	41.61	29.73	intronic	Ston2
chr12	99739603	99740207	411.03	84.55	55.77	intronic	Kcnk10
chr12	99759525	99759961	181.37	55.79	34.41	intronic	Kcnk10
chr12	100004396	100004646	78.64	26.68	13.94	intronic	Zc3h14
chr12	100354755	100355005	186.8	44.74	31.64	intergenic	AK019719
chr12	100863481	100863731	63.52	17.58	10.96	intergenic	AK006884
chr12	101068995	101069437	197.38	50.17	42.08	intronic	2610021K21Rik
chr12	101946101	101946351	75.7	15.72	7.71	intronic	Rps6ka5
chr12	101971165	101971594	203.07	40.14	35.36	intergenic	Rps6ka5
chr12	103142316	103142718	136.43	29.42	24.72	intronic	Trip11
chr12	104452649	104452899	162.25	41.98	26.83	intronic	Prima1
chr12	105979320	105979570	147.86	27.42	18.39	intronic	Dicer1
chr12	106293529	106293779	84.37	17.82	18.73	intergenic	Glrx5
chr12	106761997	106762247	368.89	108.4	53.69	intergenic	AK139027
chr12	109063188	109063838	298.82	76.84	60.49	intergenic	Bcl11b
chr12	109851946	109852196	145.63	35.09	31.64	intronic	Evl
chr12	110628677	110628927	369.71	51.22	24.15	intergenic	Dlk1
chr12	110759545	110759995	216.71	35.37	29.21	intergenic	Meg3
chr12	111698781	111699031	116.81	33.13	26.86	intronic	Ppp2r5c
chr12	112109471	112109721	101.16	25.41	24.5	intergenic	Cinp
chr12	112340703	112341088	123.35	19.16	22.59	intronic	Rcor1
chr12	114982627	114982877	169.75	46.44	31.94	intronic	abParts
chr12	115225937	115226187	58.06	13.3	9.26	intronic	abParts
chr12	119015143	119015393	120.37	29	19.04	intergenic	Rapgef5
chr12	119015743	119015993	61.56	13.88	14.78	intergenic	Rapgef5
chr12	119173119	119173729	269.17	53.78	28.11	promoter	Dnahc11
chr12	119201198	119201628	220.35	30.63	14.8	intronic	Dnahc11
chr12	120338484	120338734	138.66	17.49	16.66	intergenic	Itgb8
chr13	3580408	3580658	101.26	21.29	15.23	intronic	BC016423
chr13	6000077	6000327	159.7	28.24	40.39	intergenic	Klf6
chr13	8978642	8978892	72.03	12.3	12.77	exonic	Gtpbp4
chr13	9090420	9090670	74.52	18.92	18.39	intergenic	Larp4b
chr13	9444864	9445114	76.98	23.27	14.4	intronic	Dip2c
chr13	12406486	12406736	146.84	40.94	21.35	intronic	Actn2
chr13	18549295	18549545	125.77	33.31	32.7	intergenic	Pou6f2
chr13	19761422	19761672	65.68	10.67	9.84	intronic	Txndc3
chr13	19837637	19838041	125.41	27.23	29.18	intergenic	Gpr141
chr13	19862078	19862447	87.12	20.31	18.25	intronic	Gpr141
chr13	19974796	19975208	197.67	43.26	34.53	intergenic	Gpr141
chr13	20392823	20393073	94.25	32.46	15.59	intronic	Elmo1
chr13	22155321	22155571	75.01	20.84	9.95	intergenic	Hist1h2bj
chr13	22334253	22334503	79.26	27.15	11.92	promoter	Vmn1r194
chr13	23360389	23360639	78.58	18.33	26.04	intergenic	Vmn1r223
chr13	25118411	25118789	121.54	26.3	25.52	intergenic	Mrs2
chr13	28364499	28364749	54.95	9.59	8.3	intergenic	Prl5a1
chr13	29793302	29793552	99.36	25.72	24.43	intronic	Cdkal1
chr13	29800817	29801397	293.03	54.61	37.64	exonic	Cdkal1
chr13	30007899	30008149	106.13	30.2	13.78	intronic	E2f3
chr13	30558834	30559084	126.62	25.83	15.62	intergenic	Uqcrfs1
chr13	31174576	31174826	73.08	17.96	19.7	intergenic	EG432743
chr13	31264241	31264847	187.68	49.4	40.61	intergenic	AK137190
chr13	31300998	31301448	211.61	31.72	34.64	intergenic	AK137190
chr13	31317513	31317956	258.63	55.43	49.47	intergenic	AK137190
chr13	31432350	31432600	71.11	17.35	17.11	intergenic	AK137190
chr13	31531756	31532200	324.68	61.04	51.64	intergenic	AK143085
chr13	31532532	31532976	122.37	28.06	21.49	intergenic	AK143085
chr13	31673106	31673356	68.99	13.83	19	intronic	AK142058
chr13	31711465	31711715	178.12	44.44	35.47	intronic	AK142058
chr13	31999083	31999333	63.55	15.25	16.39	intronic	Gmds
chr13	34916044	34916544	165.73	26.94	20.94	intergenic	Prpf4b
chr13	34919820	34920428	582.58	67.76	55.63	intergenic	Prpf4b
chr13	35270018	35270443	145.07	30.14	20.91	intergenic	AK005856
chr13	35282882	35283325	229.16	48.27	46.7	intergenic	AK005856
chr13	35435967	35436217	103.54	20.35	26.53	intergenic	AK005856
chr13	35859880	35860130	131.33	24.8	22.48	intronic	Cdyl
chr13	36032814	36033064	239.46	58.53	42.21	intergenic	Ppp1r3g
chr13	36092842	36093092	109.87	21.2	13.52	intronic	Lyrm4
chr13	36179294	36179732	128.65	36.36	27.52	intronic	Lyrm4
chr13	36223594	36223844	100.93	31.93	14.85	intronic	Fars2
chr13	36604081	36604502	149.1	27.96	19.84	intronic	Fars2
chr13	37592424	37592874	228.33	42.06	24.02	intergenic	AK155516
chr13	37639836	37640232	113.43	34.67	26.51	exonic	AK155516
chr13	37771635	37772040	102.96	33.35	22.95	intergenic	BC048601
chr13	37796608	37797058	167.69	22.24	28.28	intronic	BC048601
chr13	37851396	37851646	151.69	35.93	19.53	intergenic	BC048601
chr13	38031723	38031973	121.02	25.76	21.06	intronic	Rreb1
chr13	42216399	42217045	459.02	81.82	87.32	intronic	Hivep1
chr13	43998384	43998811	135.32	36.21	48.04	intergenic	Cd83
chr13	44357583	44357833	117.29	36.41	22.98	intergenic	AK136877
chr13	44452201	44452845	741.15	130.37	118.89	intergenic	AK006512
chr13	44525748	44526198	268.22	41.43	32.12	intergenic	AK006512
chr13	44644136	44644586	227.96	27.85	24.81	intergenic	AK006512
chr13	44898523	44898773	68.23	22.18	8.09	intronic	Jarid2
chr13	46137458	46137908	192.66	37.98	44.23	intergenic	Atxn1
chr13	46645840	46646090	122.47	27.34	17.55	intronic	Cap2
chr13	46684878	46685128	142.29	38.19	28.91	intronic	Cap2
chr13	47295786	47296036	130.77	37.26	25.16	intronic	Rnf144b
chr13	49488875	49489125	245.25	47.13	66.56	intergenic	Bicd2
chr13	52364636	52364886	118.73	21.53	18.4	intergenic	AK014969
chr13	52787656	52788093	486.53	96.32	56.64	intergenic	BB123696
chr13	55347210	55347598	123.58	20.68	28.77	exonic	Nsd1
chr13	55379170	55379420	66.99	14.98	16.1	intronic	Nsd1
chr13	55988529	55988779	147.4	33.17	28.64	intergenic	Pitx1
chr13	56126287	56126537	81.13	19.54	19.76	intronic	AK043531
chr13	56152852	56153302	333.98	45.82	33.24	intronic	AK043531
chr13	58689800	58690050	138.23	34.57	26.98	intronic	Slc28a3
chr13	60005811	60006061	213.15	38.05	43.31	intergenic	Zcchc6
chr13	60420569	60421016	125.84	24.19	38.78	intergenic	EG328264
chr13	60421357	60421804	188.18	26.33	51.25	intergenic	EG328264
chr13	60422145	60422395	110.22	16.28	12.44	intergenic	EG328264
chr13	63031074	63031324	85.88	24.69	15.33	intergenic	2010111I01Rik
chr13	63177841	63178091	111.04	15.21	11.7	intronic	2010111I01Rik
chr13	63207369	63207809	173.75	24.52	17.98	intronic	2010111I01Rik
chr13	63414665	63414915	142.59	41.24	28.55	intronic	Fancc
chr13	63427367	63427617	213.23	30.41	14.72	intronic	Fancc
chr13	64332939	64333491	283.37	47.74	32.4	intronic	Cdc14b
chr13	64487191	64487633	225.75	65.11	48.91	intergenic	Ctsl
chr13	74209098	74209348	69.94	14.85	8.69	intergenic	Cep72
chr13	74462443	74462693	103.87	16.94	12.49	intronic	Sdha
chr13	75199521	75199924	165.75	35.34	30.35	intergenic	Pcsk1
chr13	76045805	76046055	143.11	32.5	36.57	intronic	Rhobtb3
chr13	76099029	76099446	107.11	23.72	13.6	intergenic	Spata9
chr13	77849486	77849736	92.19	25.61	17.62	intronic	Fam172a
chr13	90499714	90499964	82.43	20.22	21.49	intergenic	AK144747
chr13	91751510	91751760	125.15	22.64	23.94	intronic	Ssbp2
chr13	92121451	92121701	89.6	25.05	14.92	intronic	Rasgrf2
chr13	92121791	92122041	169.81	30.61	17.64	intronic	Rasgrf2
chr13	92837751	92838001	112.38	35.03	19.6	intronic	Rasgrf2
chr13	93018122	93018372	74.19	21.85	16.43	intronic	Msh3
chr13	93931572	93931822	98.31	28.91	17.12	intronic	Papd4
chr13	94863843	94864293	240.6	53.98	37.78	intronic	Lhfpl2
chr13	94881996	94882407	147.27	48.08	27.24	intronic	Lhfpl2
chr13	95268953	95269203	179.57	42.92	31.83	intronic	Ap3b1
chr13	95818702	95818952	235.66	57.02	44.17	intronic	Pde8b
chr13	96089217	96089467	166.64	21.51	27.86	intergenic	Zbed3
chr13	96400602	96401162	217.04	24.77	25.81	intronic	Iqgap2
chr13	96501255	96501505	135.16	24.88	15.04	exonic	Iqgap2
chr13	97755790	97756232	225.29	31.09	22.31	intergenic	Gcnt4
chr13	98612823	98613467	338.76	62.94	69.54	intergenic	Rgnef
chr13	99767223	99767473	132.64	26	22.96	intergenic	AK020854
chr13	101207347	101207775	249.28	43.65	27.39	intronic	Naip5
chr13	102577696	102578318	396.15	34.72	28.02	intergenic	Pik3r1
chr13	102580856	102581106	86.3	21.9	24.75	intergenic	Pik3r1
chr13	102722632	102722882	126.69	34.29	15.82	intergenic	AK043460
chr13	102767593	102767843	83.16	18.56	18.73	intergenic	AK043460
chr13	103640536	103640966	198.48	63.04	37.24	intronic	Mast4
chr13	103734991	103735428	127.83	30.43	28.8	intronic	Mast4
chr13	103735552	103735989	243.68	36.25	29.28	intronic	Mast4
chr13	104671283	104671733	126.32	26.23	41.85	intronic	Erbb2ip
chr13	105924598	105924848	107.7	27.66	27.89	intronic	Rnf180
chr13	107861909	107862159	67.55	13	12.05	intronic	AK172672
chr13	109116526	109116972	182.08	43.45	27.12	intronic	Depdc1b
chr13	109931206	109931456	58.94	9.9	7.94	intronic	Pde4d
chr13	110095638	110095888	74.32	16.62	12.95	intronic	Pde4d
chr13	110680267	110680673	204.63	58.81	39.26	intronic	Pde4d
chr13	111141166	111141540	120.82	26.04	26	intergenic	Gapt
chr13	111930543	111930963	114.28	19.29	14.18	intergenic	Actbl2
chr13	112085334	112085584	91.73	29.68	20.1	intergenic	Actbl2
chr13	112086200	112086607	277.91	51.82	52.97	intergenic	Actbl2
chr13	112424248	112424698	372.68	93.4	49.63	intergenic	Mier3
chr13	112446628	112446878	75.6	12.14	16.88	intergenic	Mier3
chr13	112719113	112719743	269.18	50.79	39.9	intergenic	AK134426
chr13	112773283	112773721	126.33	31.55	41.62	intergenic	AK134426
chr13	112884105	112884741	389.74	48.28	44.15	intergenic	Ankrd55
chr13	112968497	112968860	79.69	16.21	11.16	intergenic	Ankrd55
chr13	113553346	113553596	99.39	15.88	23.72	intergenic	Slc38a9
chr13	113643889	113644139	169.88	47.77	23.47	intronic	Ppap2a
chr13	114295020	114295270	66.86	11.84	15.82	intergenic	Snx18
chr13	114317175	114317586	135.68	37.51	29.25	intergenic	Snx18
chr13	114326488	114326738	66.82	14.29	15.63	intergenic	Snx18
chr13	114515711	114516120	249.54	45.9	35.58	intergenic	Hspb3
chr13	114738472	114738722	105.51	24.08	30.82	intronic	Arl15
chr13	115187094	115187497	97.56	28.92	21.61	intergenic	Ndufs4
chr13	116177739	116178343	187.39	24.34	26.1	intergenic	Itga1
chr13	118534009	118534431	209.82	20.34	20.85	intronic	Hcn1
chr13	118685283	118685634	77.66	12.82	11.06	intronic	Hcn1
chr13	118686824	118687223	98.41	11.64	18.7	intronic	Hcn1
chr13	118687672	118688071	99.07	9.27	5.05	intronic	Hcn1
chr13	119061757	119062198	223.46	10.81	12.24	intergenic	Mrps30
chr13	120045210	120045460	121.19	32.99	30.85	intergenic	Nnt
chr13	120057056	120057706	298.2	70.04	64.09	intergenic	Nnt
chr14	8672315	8672764	183.99	52.73	26.02	intronic	Flnb
chr14	9116187	9116637	248.26	51.39	44.06	intergenic	Fam107a
chr14	9291630	9291880	73.11	12.74	11.78	intronic	4930452B06Rik
chr14	12893757	12894178	159.64	40.04	28.82	intronic	Ptprg
chr14	12914736	12914986	96.8	31.97	17.1	intronic	Ptprg
chr14	15431942	15432192	102.7	24.53	18.76	intergenic	Slc4a7
chr14	15517941	15518191	77.6	16.71	24.03	intergenic	Slc4a7
chr14	18718712	18719078	89.64	20.39	20.37	intronic	Thrb
chr14	19168904	19169346	151.69	45.84	36.45	intergenic	Ube2e1
chr14	19586386	19586960	278.31	34.19	64.41	intronic	Ube2e2
chr14	19587068	19587318	99.78	17.15	23.63	intronic	Ube2e2
chr14	19590443	19590693	66.14	13.44	16.32	intronic	Ube2e2
chr14	20003341	20003778	254.68	54.74	51.69	intergenic	DQ557218
chr14	21445525	21445951	258.1	52.41	23.29	intergenic	Usp54
chr14	21819060	21819310	87.78	27.09	19.63	intronic	Vcl
chr14	22198117	22198545	356.67	18.14	25.28	intronic	Adk
chr14	22254128	22254378	60.44	12.69	16.12	intronic	Adk
chr14	22342354	22342797	245.77	55.26	55.73	intronic	Myst4
chr14	22428384	22428823	126.49	26.48	24.27	intronic	Myst4
chr14	22573826	22574076	101.87	27.7	11.86	intronic	Samd8
chr14	23562493	23562743	101.45	25.25	17.57	intronic	1700112E06Rik
chr14	23642015	23642441	87.71	21.74	25.47	intronic	1700112E06Rik
chr14	23660299	23660663	103.68	21.83	27.25	intronic	1700112E06Rik
chr14	23980114	23980364	88.99	18.25	16.5	intergenic	Gm10248
chr14	26602640	26602890	76.91	18.98	13.3	intergenic	Zcchc24
chr14	27172328	27172970	409.16	82.4	49.53	intergenic	AK087762
chr14	27239678	27240056	99.46	15.64	13.59	intronic	Slmap
chr14	28350621	28350871	76.09	23.08	16.36	intergenic	Ccdc66
chr14	28842164	28842414	60.54	12	9.87	intronic	Erc2
chr14	29263828	29264078	81.94	23.46	17.39	intronic	Erc2
chr14	31154485	31155531	730.09	119.21	110.02	intronic	Cacna1d
chr14	31254607	31255241	342.08	37.54	45.69	intronic	Cacna1d
chr14	32692667	32693069	166.12	21.02	28.27	intergenic	Ankrd28
chr14	32908845	32909276	285.34	33.59	22.07	intronic	Oxnad1
chr14	33039892	33040142	70.95	20.25	10.25	intronic	Parg
chr14	33289942	33290192	141.08	43.89	17.83	intronic	AK049621
chr14	35336056	35336306	96.7	30.28	18.66	promoter	9230112D13Rik
chr14	45901981	45902231	78.93	8.06	19.11	intergenic	Ero1l
chr14	46238630	46238880	91.7	13.86	15.5	intronic	Ddhd1
chr14	47159568	47160018	510.42	102.76	34.07	intergenic	Bmp4
chr14	47522525	47522775	86.5	24.65	16.18	intronic	Samd4
chr14	47619970	47620389	133.13	32.09	42.17	promoter	Samd4
chr14	47860258	47860666	128.98	28.87	24.98	exonic	Wdhd1
chr14	53646630	53646880	76.68	17.2	17.02	intronic	M21205
chr14	53900321	53900571	106.85	32.75	23.56	intronic	Gm16980
chr14	53921395	53921645	74.22	12.29	21.82	promoter	100042579
chr14	53950848	53951098	78.41	16.46	11.17	intronic	TCRA
chr14	54179141	54179391	81.72	23.96	14.66	intronic	Gm13980
chr14	54282703	54282953	106.62	18.79	20.82	intronic	Gm13980
chr14	54303018	54303441	158.43	46.96	35.09	promoter	Gm10902
chr14	54343161	54343598	344.51	50.56	31.09	intronic	Gm13980
chr14	54953527	54953976	246.59	58.12	34.68	intergenic	Oxa1l
chr14	55428258	55428696	234.72	52.6	34.13	intergenic	Slc7a8
chr14	55754222	55754637	218.91	44.86	20.75	intergenic	Jph4
chr14	57037469	57037973	149.33	28.32	33.19	intronic	Rnf17
chr14	57038981	57039231	99.03	12.75	11.25	intronic	Rnf17
chr14	57071110	57071360	141.24	26.01	17.27	intronic	Rnf17
chr14	57114935	57115531	200.81	31.78	33.99	intronic	Rnf17
chr14	60438783	60439033	109.11	24.65	25.86	intronic	Atp8a2
chr14	60597494	60597744	175.61	45.13	20.35	intronic	Atp8a2
chr14	60987140	60987390	130.94	24.52	22.53	intergenic	Fam123a
chr14	61016426	61016676	156.14	41.56	23.59	intergenic	Fam123a
chr14	61060077	61060426	82.21	25.07	20.3	intergenic	Fam123a
chr14	61226694	61227100	286.2	80.04	56.56	intergenic	Spata13
chr14	61303327	61303577	101.22	14.05	8.14	intronic	Spata13
chr14	61446763	61447013	156.04	30.98	30.34	intronic	Mipep
chr14	61830309	61830559	195.77	37.41	46.37	intronic	Sacs
chr14	62009417	62009784	83.84	19.17	29.35	intronic	Kpna3
chr14	62230749	62230999	62.02	14.87	11.42	exonic	Kcnrg
chr14	62787495	62787745	73.86	19.16	17.76	intergenic	Dleu7
chr14	63645989	63646239	90.75	19.82	24.29	intergenic	Defb30
chr14	63724384	63724976	330.37	42.74	27.03	intergenic	Ctsb
chr14	63768887	63769329	235.57	44.4	26.97	intronic	Fdft1
chr14	63826555	63826805	85.12	26.13	18.93	intronic	Gata4
chr14	63890653	63890903	100.44	26.4	20.33	promoter	Gata4
chr14	64752675	64752925	154.4	37.33	22.01	intronic	Msra
chr14	64812681	64813109	291.13	30.68	26.71	intronic	Msra
chr14	65839417	65839837	148.74	33.16	22.37	intronic	Fzd3
chr14	66733252	66733661	186.54	50.23	37.71	intronic	Ephx2
chr14	66860249	66860499	190.2	47.6	36.22	intronic	Ptk2b
chr14	67705370	67705817	202.21	48.25	21.13	intergenic	Ppp2r2a
chr14	68561576	68561826	74.72	17.02	15.85	intergenic	Dock5
chr14	68988970	68989220	58.84	9.24	12.44	intergenic	Adam7
chr14	69981636	69982286	537.73	125.49	96.85	exonic	AK086749
chr14	70234908	70235158	56.06	11.69	6.46	intergenic	Pebp4
chr14	70754335	70754585	118.11	19.94	13.1	intergenic	Slc39a14
chr14	72516654	72516904	109.99	17.69	22.42	intergenic	AK015316
chr14	72549340	72549590	135.22	26.51	44.54	intergenic	AK015316
chr14	72571726	72571976	168.51	18.13	18.47	intergenic	AK015316
chr14	72572326	72572576	122.56	12.67	21.09	intergenic	AK015316
chr14	72572726	72572976	102.89	26.36	23.72	intergenic	AK015316
chr14	72604788	72605038	109.93	19.27	16.1	intergenic	AK015316
chr14	72692459	72692709	137.87	28.84	39.33	intergenic	Fndc3a
chr14	73649812	73650062	140.36	13.37	30.21	intronic	Rb1
chr14	73860414	73860664	116.4	30.02	26.34	intergenic	Med4
chr14	75226053	75226703	381.36	53.44	63.6	exonic	Lrch1
chr14	75281771	75282196	224.4	42.49	25.51	intronic	Lrch1
chr14	76828783	76829033	101.32	28.99	17.8	intronic	Tsc22d1
chr14	77254674	77254924	79.69	16.63	5.94	intergenic	1700108F19Rik
chr14	79317999	79318374	142.56	35.85	39.26	intronic	1300010F03Rik
chr14	79757744	79758172	316.43	69.29	77.82	intronic	Naa16
chr14	80000483	80001007	117.45	19.2	20.1	intronic	Sugt1
chr14	80021087	80021337	59.2	11.33	16.41	intronic	Sugt1
chr14	86873495	86873745	143.64	38.85	17.78	intergenic	Diap3
chr14	90007293	90007723	135.22	10.45	18.61	intergenic	Gm5088
chr14	98380053	98380303	135.97	31.48	26.43	intronic	Dach1
chr14	98523690	98523940	70.16	7.98	12.44	intronic	Dach1
chr14	99652543	99652793	121.55	24.01	24.22	intronic	Pibf1
chr14	99762035	99762285	160.19	27.18	31.85	intergenic	Klf5
chr14	99919726	99920324	480.68	40.73	40.64	intergenic	Klf5
chr14	100270668	100271098	265.84	26.6	14.56	exonic	Klf12
chr14	101958277	101958527	52.79	10.26	10.87	intronic	Tbc1d4
chr14	104331853	104332103	63.91	6.29	7.77	intergenic	AK015289
chr14	104339325	104339575	143.6	41.02	28.72	intergenic	AK015289
chr14	105637142	105637392	135.23	33.41	14.34	intergenic	Ndfip2
chr14	105786457	105786883	328.31	47.17	82.63	intergenic	Ndfip2
chr14	105971406	105972038	444.63	50.9	67.43	intergenic	FJ744746
chr14	118893416	118893666	111.37	25.8	25.75	intronic	Abcc4
chr14	122407939	122408189	139.77	37.56	18.89	exonic	Ubac2
chr14	122961597	122962041	163.28	23.85	19.64	exonic	Pcca
chr14	123032646	123032896	91.41	27.2	14.8	intronic	Pcca
chr15	5356694	5356944	64.24	14.71	12.88	intergenic	BC023070
chr15	5531622	5531872	75.44	16.06	18.34	intronic	BC023070
chr15	5532346	5532596	81	18	24.49	exonic	BC023070
chr15	5535561	5535968	138.53	24.24	11.87	intronic	BC023070
chr15	7231327	7231577	67.09	16.72	8.09	intronic	Egflam
chr15	7992893	7993143	61.56	11.72	17.01	intronic	Wdr70
chr15	8611858	8612308	214.63	39.23	39.68	intronic	Slc1a3
chr15	8730430	8730877	122.04	19.47	16.65	intergenic	Slc1a3
chr15	26603378	26603828	136.54	30.28	51.4	intronic	Fbxl7
chr15	26815903	26816153	83.58	13.95	15.67	intronic	Fbxl7
chr15	27297477	27297727	82.27	10.64	11.8	intergenic	Mir297-1
chr15	32046571	32046821	79.79	18.24	23.74	intergenic	Tas2r119
chr15	32631355	32631605	69.84	15.27	14.91	intergenic	Sema5a
chr15	33282320	33282570	93.82	21.65	19.01	intronic	Pgcp
chr15	34299331	34299581	183.72	36.57	30.45	intronic	Matn2
chr15	34495784	34496234	298.56	49.1	59.12	intergenic	Nipal2
chr15	34505187	34505437	99.62	27.42	18.04	exonic	Nipal2
chr15	34561203	34561642	155.39	31.17	41.19	intronic	Nipal2
chr15	34575998	34576248	84.63	9.24	12.5	intronic	Nipal2
chr15	35150204	35150454	175.09	24.4	32.71	intergenic	Stk3
chr15	37278739	37279162	154.7	37.73	43.41	intronic	Grhl2
chr15	38956685	38956935	74.94	22.25	16.99	intronic	Dcaf13
chr15	38957604	38957985	109.93	13.91	7.9	intronic	Dcaf13
chr15	41656965	41657215	135.02	35.58	20.53	intronic	Oxr1
chr15	47573263	47573649	82.08	8.63	7.46	intronic	Csmd3
chr15	47592228	47592770	216.02	13.49	20.31	intronic	Csmd3
chr15	51664542	51664983	102.69	21.43	16.53	intronic	Eif3h
chr15	53079941	53080191	55.31	12.29	6.15	intronic	Ext1
chr15	54427637	54427887	122.98	23.02	17.36	intronic	Mal2
chr15	54877998	54878248	171.38	33.79	20.07	promoter	Taf2
chr15	54879797	54880227	154.99	32.11	29.89	exonic	Taf2
chr15	57441243	57441893	209.05	48.68	30.79	intergenic	Zhx2
chr15	57442043	57442293	61.33	14.72	10.57	intergenic	Zhx2
chr15	57773004	57773254	72	20.6	16.33	intronic	Wdr67
chr15	57784308	57784558	122.4	29.75	14.5	exonic	Wdr67
chr15	58380603	58380853	116.8	20.97	10.34	intergenic	D15Ertd621e
chr15	58499341	58499591	113.4	27.92	30.6	intergenic	Tmem65
chr15	58751706	58752137	134.02	17.5	17.15	intronic	Tatdn1
chr15	60978630	60978880	100.27	28.13	16.97	intergenic	EU234017
chr15	61651167	61651417	117.03	29.36	25.14	intergenic	AK163289
chr15	61759701	61759951	97.69	18.69	24.25	intergenic	Myc
chr15	61908184	61908434	92.03	27	19.1	intronic	Pvt1
chr15	61908568	61908818	79.23	18.88	22.23	intronic	Pvt1
chr15	63532842	63533092	94.09	19.58	22.85	intergenic	AK015428
chr15	67916467	67916717	121.28	25.57	27.4	intronic	Zfat
chr15	73094442	73094692	166.81	37.87	19.87	exonic	Ptk2
chr15	73153294	73153544	107.27	18.03	35.74	intronic	Ptk2
chr15	73414106	73414556	283.71	68.2	38.67	intronic	Slc45a4
chr15	75222423	75222673	84.76	23.2	12.41	intergenic	9030619P08Rik
chr15	76973305	76973755	229.49	32.21	28.27	intronic	Rbfox2
chr15	80661600	80662050	230.44	73.42	43.37	intronic	Tnrc6b
chr15	80741254	80741904	606.24	88.51	67.04	intronic	Tnrc6b
chr15	81309777	81310027	81.98	22.08	10.54	intergenic	Rbx1
chr15	82253584	82253834	79.85	17.19	18.05	intergenic	Cyp2d10
chr15	86269936	86270186	120.1	32.43	29.41	intronic	Tbc1d22a
chr15	89307779	89308029	167.13	19.69	21.29	promoter	Arsa
chr15	94631759	94632202	388.67	92.7	54.37	intronic	Tmem117
chr15	94803291	94803541	133.22	22.21	11.62	intronic	Tmem117
chr15	96626354	96627150	526.1	57.53	67.17	intergenic	Slc38a2
chr15	96787285	96787705	142.69	29.66	22.97	intergenic	Slc38a4
chr15	99888665	99888915	130.25	40.47	23.1	intronic	Dip2b
chr15	100350860	100351301	167.26	28.28	37.45	exonic	Tcfcp2
chr16	4044139	4044389	117.1	30.75	19.53	intronic	Trap1
chr16	4087361	4087611	105.77	24.73	27.07	intronic	Crebbp
chr16	4100341	4100790	388.85	23.9	24.17	intronic	Crebbp
chr16	4117048	4117298	90.56	16.49	19.99	exonic	Crebbp
chr16	5523629	5523879	92.48	26.13	16.73	intergenic	Fam86
chr16	5524429	5524679	147.66	36	29.12	intergenic	Fam86
chr16	6502394	6502644	116.15	23.32	34.07	intronic	Rbfox1
chr16	6503780	6504221	223.59	39.31	72.13	intronic	Rbfox1
chr16	6509056	6509437	112.26	15.77	22.73	intronic	Rbfox1
chr16	6583468	6583718	68.33	11.97	14.11	intronic	Rbfox1
chr16	6584744	6585170	238.54	19.72	23.96	intronic	Rbfox1
chr16	6585272	6585522	64.24	5.98	13.69	intronic	Rbfox1
chr16	10830981	10831231	95.11	17.51	6.78	intergenic	A630055G03Rik
chr16	11788511	11788761	102.27	25.82	17.12	intergenic	AK014704
chr16	11884215	11884465	63.98	17.46	8.4	exonic	Cpped1
chr16	12071478	12071728	122.07	25.5	25.6	intronic	Shisa9
chr16	13040880	13041130	99.65	11.78	13.81	intergenic	Ercc4
chr16	13575284	13575534	112.67	18.06	26.84	intronic	Parn
chr16	16368428	16368878	199.27	36.26	46.23	intergenic	Dnm1l
chr16	18187034	18187484	404.94	57.02	41.05	intergenic	4933432I09Rik
chr16	18955208	18955458	113.69	24.15	17.04	intronic	Hira
chr16	18960513	18960763	197.8	51.04	31.48	intronic	Hira
chr16	18967089	18967339	84.7	19.21	15.29	intronic	Hira
chr16	20348871	20349294	142.81	30.04	30.39	intronic	Abcc5
chr16	20357052	20357658	376.15	116.27	56.06	exonic	Abcc5
chr16	20810361	20810611	99.88	22.98	16.54	intergenic	Chrd
chr16	20875285	20875732	189.39	50.77	48.13	intergenic	Chrd
chr16	21369851	21370101	121.71	23.28	23.73	intergenic	Vps8
chr16	21370231	21370671	524.58	68.49	43.66	intergenic	Vps8
chr16	21478356	21478798	377.06	75.65	66.2	exonic	Vps8
chr16	21814152	21814402	66.89	10.72	11.97	intergenic	AK031500
chr16	24254558	24255208	238.91	20.78	38.45	intergenic	AK039760
chr16	24255358	24255608	123.87	25.6	34.58	intergenic	AK039760
chr16	24347303	24347553	126.3	29.72	15.68	intergenic	AK039760
chr16	24501571	24501994	231.11	60.27	30.37	intronic	Lpp
chr16	24515251	24515678	198.26	29.96	30.04	intronic	Lpp
chr16	24586461	24586866	167.2	31.83	25.81	intronic	Lpp
chr16	25069610	25069860	69.71	17.34	16.76	intergenic	AK053957
chr16	25295527	25296125	426.54	30.27	28.16	intronic	Tprg
chr16	25629710	25630316	276.6	52.64	34.65	intergenic	Trp63
chr16	26755357	26755969	241.85	33.55	34.03	promoter	AK050069
chr16	28106002	28106252	183.76	39.55	23.56	intergenic	AK046130
chr16	29595626	29596016	124.1	23.18	20.15	intronic	Opa1
chr16	29607340	29607590	141.45	39.27	28.64	intronic	Opa1
chr16	29851465	29851715	94.49	17.63	19.62	intergenic	AK144120
chr16	31329420	31329847	188.51	47.8	47.35	intergenic	Apod
chr16	31799394	31799833	122.99	15.98	16.63	intronic	Dlg1
chr16	32284283	32284533	104.95	25.43	32.48	intronic	Rnf168
chr16	32379634	32380222	355.79	30.33	31.27	intronic	Ubxn7
chr16	34270656	34270906	166.05	39.31	38.25	intronic	Kalrn
chr16	35067316	35067703	101.65	22.43	22.6	intronic	Ptplb
chr16	37345108	37345358	71.87	16.99	17.76	exonic	Stxbp5l
chr16	37920175	37920425	96.81	13.66	28.74	intronic	Gpr156
chr16	38188361	38188611	76.15	19.3	14.64	intronic	Gsk3b
chr16	38752510	38753120	307.13	41.83	32.89	exonic	B4galt4
chr16	39285626	39285876	70.75	19.9	12.53	intergenic	Igsf11
chr16	45251141	45251537	77.63	11.95	20.17	exonic	Btla
chr16	45378488	45379128	231.41	44	50	intergenic	Cd200
chr16	46922537	46922942	89.38	15.56	16.14	intergenic	Pvrl3
chr16	47398878	47399128	77.95	23.6	18.4	intergenic	Dppa4
chr16	48437866	48438116	62.84	10.39	18.96	intronic	Morc1
chr16	48902894	48903223	76.16	15.61	22.78	intergenic	Dzip3
chr16	49887573	49887823	67.88	20.72	11.43	intronic	Cd47
chr16	49903411	49903807	170.08	34.56	34.98	intronic	Cd47
chr16	49959254	49959504	91.7	22.76	18.91	intergenic	AK076728
chr16	50000629	50000879	86.72	24.2	21.62	intergenic	AK045242
chr16	52242196	52242446	61.89	14.49	13.81	intergenic	Alcam
chr16	54308974	54309424	137.85	22.44	16.27	intergenic	Zpld1
chr16	55555695	55555945	100.4	29.68	21.01	intergenic	DQ687660
chr16	55735943	55736342	177.83	32.13	32.49	intergenic	Nfkbiz
chr16	55893610	55893860	136.89	26.78	20.43	intronic	Fam55c
chr16	57186770	57187198	191.75	18.31	28.87	exonic	Tbc1d23
chr16	57446857	57447107	95.36	19.51	23.94	intronic	2610528E23Rik
chr16	57472030	57472280	269.2	41.48	24.56	intronic	2610528E23Rik
chr16	58590882	58591132	68.76	14.8	14.79	intergenic	Gm813
chr16	58815154	58815547	87.51	14	11.01	intergenic	Olfr175-ps1
chr16	63277950	63278356	245.86	29.17	29.17	intergenic	Epha3
chr16	76320453	76320703	91.53	29.47	19.16	intronic	Nrip1
chr16	76482199	76482607	109.41	22.9	16.05	intergenic	Nrip1
chr16	76974579	76975165	189.78	48.75	38.54	intergenic	AK077115
chr16	77103846	77104096	85.06	19.1	19.02	intronic	Usp25
chr16	77469534	77469975	277.49	49.42	25.91	intronic	AK051166
chr16	78338298	78338548	84.89	14.22	27.02	exonic	Cxadr
chr16	79059287	79059716	147.69	16.56	18.72	promoter	Tmprss15
chr16	79143269	79143519	64.27	2.41	5.3	intergenic	Tmprss15
chr16	85391769	85392219	202.91	22.52	21.85	intergenic	Cyyr1
chr16	85630006	85630411	108.88	14.4	14.55	intergenic	Cyyr1
chr16	85648852	85649102	74.71	13.26	13.61	intergenic	Cyyr1
chr16	87631403	87632009	293.72	39	28.3	intergenic	ORF63
chr16	87818473	87818723	135.92	16.65	14.09	intergenic	Grik1
chr16	87891976	87892544	145.7	30.33	36.93	intergenic	Grik1
chr16	87961909	87962507	347.16	52.17	30.41	intronic	Grik1
chr16	87963216	87963666	170.11	30.3	25.12	intronic	Grik1
chr16	87970348	87970781	139.81	42.85	26.34	intronic	Grik1
chr16	88347004	88347254	83.94	23.4	22.21	intergenic	Grik1
chr16	91590855	91591298	153.91	22.68	14.11	intronic	Tmem50b
chr16	91678694	91679208	193.02	49.01	34.32	exonic	Son
chr16	91772293	91772739	151.46	39.72	30.35	intronic	Itsn1
chr16	92070679	92071128	223.82	54.95	44.08	intronic	Mrps6
chr16	93209943	93210733	354.72	67.04	55.8	intergenic	AK007854
chr16	93219967	93220417	130.09	25.6	24.99	intergenic	AK007854
chr16	93326097	93326347	156.93	46.66	26.35	intergenic	AK007854
chr16	95582930	95583180	181.76	33.54	43.44	exonic	Erg
chr16	95660874	95661124	189.29	36.44	29.64	intronic	Erg
chr16	96535131	96535381	112.97	26.66	19.72	intronic	B3galt5
chr16	96748625	96748875	343.49	58.47	58.18	intergenic	Igsf5
chr16	96755440	96755690	198.44	31.74	37.33	intergenic	Igsf5
chr16	98019507	98019949	195.67	61.31	29.27	intronic	Prdm15
chr17	3266182	3266579	153.22	31.72	21.5	intronic	AK049769
chr17	4177531	4177781	153.59	30.07	48.99	intergenic	AK019751
chr17	5195840	5196090	68.2	8.04	11.56	intronic	Arid1b
chr17	5755480	5755902	194.43	42.78	27.65	intergenic	Zdhhc14
chr17	6018414	6018664	166.9	45.85	32.1	intronic	Synj2
chr17	6989853	6990103	113.56	33.69	24.8	intergenic	Ezr
chr17	7114354	7114604	314.36	79.46	59.55	exonic	Rsph3b
chr17	7194450	7194700	126.79	29.22	13.13	intronic	Rnaset2b
chr17	7550257	7550507	161.8	39.29	25.25	intergenic	Tcp10a
chr17	8329069	8329503	192.92	49.26	29.19	intronic	Rnaset2b
chr17	8845554	8846001	342.17	62.5	78.23	intronic	Pde10a
chr17	9036782	9037232	188.46	34.72	33.28	intronic	Pde10a
chr17	9056230	9056480	86.72	18.33	16.85	intronic	Pde10a
chr17	10610410	10610660	116.81	23.42	21.75	intronic	Pacrg
chr17	13128613	13129063	302.76	60.12	25.42	intronic	Acat3
chr17	13275471	13275721	165.79	47.33	30.88	intronic	Gm9880
chr17	13570020	13570270	150.25	43.3	30.09	exonic	Gm9880
chr17	15593514	15593914	179.84	42.6	23.77	intergenic	Psmb1
chr17	16032897	16033147	62.51	15.85	16.88	intergenic	Rgmb
chr17	16446187	16446604	106.56	20.1	13.73	intergenic	Rgmb
chr17	16620976	16621375	121.65	25.2	21.49	intergenic	Zfp960
chr17	16957050	16957500	241.41	37.42	33	intergenic	Zfp960
chr17	16957650	16957900	91.37	19.68	23.3	intergenic	Zfp960
chr17	18112408	18112658	58.06	12.38	10.6	intergenic	Fpr3
chr17	26514474	26514724	131.59	33.43	16.57	intergenic	Neurl1b
chr17	27905834	27906272	409.03	94.58	76.4	intronic	D17Wsu92e
chr17	29649771	29650021	73.93	17.78	14.91	intergenic	Tmem217
chr17	29729639	29730066	214.63	30.65	22.42	intronic	AK002805
chr17	30380535	30380785	126.23	35.13	28.18	intronic	Btbd9
chr17	30425086	30425336	117.29	22.79	26.04	intronic	Btbd9
chr17	30650437	30650687	66.7	10.01	20.53	exonic	Btbd9
chr17	32965201	32965451	66.53	10.16	13.01	intronic	Zfp799
chr17	43218132	43218564	322.15	78.61	49.31	intronic	Tnfrsf21
chr17	43412116	43412566	145.34	27.39	16.73	intronic	Gpr110
chr17	46946135	46946913	346.32	47.86	43.46	exonic	BC032203
chr17	47848961	47849211	235.7	36.8	28.76	intergenic	Frs3
chr17	48396398	48396648	129.59	35.09	17.75	intronic	Trem3
chr17	49136899	49137149	72.03	16.16	14.92	intronic	Lrfn2
chr17	49370696	49370946	117.36	28.05	30.6	intergenic	LOC100415784
chr17	49443996	49444246	140.37	39.57	23.71	exonic	LOC100415784
chr17	49485415	49485800	167.72	32.1	35.82	intergenic	LOC100415784
chr17	50123562	50123812	130.02	25.45	31.09	intergenic	Rftn1
chr17	50123962	50124212	139.09	21.01	14.75	intergenic	Rftn1
chr17	50564460	50564710	83.32	25.81	18.28	intergenic	Plcl2
chr17	51072675	51073096	99.65	8.14	15	intronic	Tbc1d5
chr17	56513035	56513485	206.38	34.96	34.06	intronic	Kdm4b
chr17	63869799	63870228	129.63	28.04	26.59	intergenic	Fbxl17
chr17	64196437	64196687	100.18	26.38	22.44	intergenic	Fert2
chr17	64548593	64549043	706.08	132.5	94.03	intergenic	AK019598
chr17	64557514	64558128	293	72.57	42.53	intergenic	AK019598
chr17	65030831	65031081	94.74	27.02	19.02	exonic	Man2a1
chr17	65887917	65888323	135	21.92	28.78	intronic	Tmem232
chr17	65906085	65906335	80.64	15.38	29.3	intergenic	Tmem232
chr17	66024077	66024489	245.02	68.51	45.71	promoter	Rab31
chr17	66356770	66357219	198.36	17.68	15.4	intronic	Ankrd12
chr17	67230254	67230704	409.99	33.16	40.54	intronic	Ptprm
chr17	67230854	67231104	285.69	23.78	44.91	intronic	Ptprm
chr17	67282905	67283341	128.75	22.36	26.25	intronic	Ptprm
chr17	67542754	67543204	553.92	119.01	87.8	intronic	Ptprm
chr17	67612596	67612846	83.98	17.34	18.09	intronic	Ptprm
chr17	67640774	67641216	279.95	47.09	35.79	intronic	Ptprm
chr17	67654030	67654280	125.44	24.08	16.03	intronic	Ptprm
chr17	67654426	67654676	158.26	26.31	18.69	intronic	Ptprm
chr17	67673472	67673915	191.94	40.37	31.19	intronic	Ptprm
chr17	67951831	67952681	403.55	64.31	76.14	intergenic	Lrrc30
chr17	71009738	71009988	62.05	14.68	14.41	intronic	Dlgap1
chr17	71383894	71384262	119.85	24.03	33.25	exonic	Myom1
chr17	71450445	71450695	65.68	9.83	13.07	exonic	Myom1
chr17	72747546	72747996	129.07	36.27	30.34	intronic	Alk
chr17	72748674	72749524	882.87	63.29	92.62	intronic	Alk
chr17	74342083	74342333	69.87	12.69	19.99	intergenic	Srd5a2
chr17	74346070	74346320	147.57	32.7	18.33	intergenic	Srd5a2
chr17	76955923	76956343	188.96	50.48	40.63	intergenic	Gm4710
chr17	78969729	78969979	84.66	27.01	11.25	intronic	Vit
chr17	79241698	79241948	179.14	28.21	22.75	intronic	Ccdc75
chr17	79244421	79244671	99.98	11.76	8.09	exonic	Ccdc75
chr17	80915297	80915547	73.4	17.42	15.96	intergenic	Cdkl4
chr17	83731770	83732020	77.11	20.69	7.88	intergenic	Eml4
chr17	83966520	83967570	857.52	92.94	83.23	intergenic	Kcng3
chr17	85046918	85047168	73.63	10.77	6.98	exonic	Dync2li1
chr17	86327788	86328238	363.1	60.13	62.31	intergenic	Srbd1
chr17	86584882	86585286	172.3	50.14	44.19	intronic	Prkce
chr17	86891766	86892016	109.73	20.3	17.36	intronic	Prkce
chr17	86894008	86894258	101.09	23.36	29.75	intronic	Prkce
chr17	87335204	87335454	106.3	34.28	16.86	intergenic	Atp6v1e2
chr17	87393687	87394106	121.91	20.58	22.84	exonic	Rhoq
chr17	88081037	88081472	383.32	46.77	34.97	intronic	Msh2
chr17	88449642	88450005	126.1	24.99	20.21	intronic	Fbxo11
chr17	88778567	88778817	76.19	18.04	17.44	intergenic	Foxn2
chr17	88778875	88779125	199.14	31.37	17.5	intergenic	Foxn2
chr17	88858819	88859069	90.81	22.65	23.36	intronic	Foxn2
chr17	88865881	88866292	273.2	73.48	44.14	intronic	Foxn2
chr17	88906460	88906710	97.13	16.14	13.28	intergenic	Foxn2
chr18	3270905	3271155	77.66	21.81	17.96	intronic	Crem
chr18	5650868	5651118	120.95	13.56	17.35	intronic	Zeb1
chr18	6312517	6312767	146.54	13.41	6.27	intergenic	AK020087
chr18	6312917	6313167	145.76	32.72	15.64	intergenic	AK020087
chr18	6313317	6313567	129.95	24.03	21.45	intergenic	AK020087
chr18	6408942	6409375	145.9	31.27	24.97	intergenic	Epc1
chr18	8880288	8880538	75.5	14.71	9.04	intergenic	Fzd8
chr18	11009311	11009561	302.22	62.55	35.54	intergenic	AK033147
chr18	11110078	11110328	74.22	21.83	11.85	intergenic	Gata6
chr18	11348208	11348626	126.09	27.14	33.59	intergenic	Gata6
chr18	11400236	11400838	373.54	83.61	68.38	intergenic	Gata6
chr18	11462661	11462911	131.36	32.66	28.34	intergenic	Rbbp8
chr18	11640850	11641100	67.61	6.86	9.4	intergenic	Rbbp8
chr18	11752306	11752755	152.21	39.46	26.39	intergenic	Rbbp8
chr18	12240238	12240645	157.88	47.67	34.03	intronic	6030446N20Rik
chr18	13000574	13000991	217.62	31.17	32.1	intronic	Osbpl1a
chr18	13051687	13051937	86.85	15.58	18.4	intronic	Osbpl1a
chr18	14389074	14389324	137.22	22.53	44.48	intergenic	Zfp521
chr18	14421067	14421317	56.55	12.29	11.56	intergenic	Zfp521
chr18	15544994	15545444	256.51	29.61	48.12	intergenic	Aqp4
chr18	21335661	21335911	67.58	16.4	16.77	intronic	Fam59a
chr18	24402612	24402862	92.64	20.96	22.9	intronic	Galnt1
chr18	29762083	29762792	193.22	26.25	36.34	intergenic	AK132929
chr18	30444483	30444973	125.74	18.4	17.27	intronic	Pik3c3
chr18	31856741	31856991	141.9	31.43	35.8	intronic	Sap130
chr18	34301932	34302345	92	21.87	10.53	intergenic	AK160850
chr18	35648443	35648833	117.45	27.88	23.11	intronic	Sil1
chr18	36257399	36257744	87.22	16.73	15.03	intronic	Nrg2
chr18	38934584	38934834	206.63	46.92	20.35	intergenic	Fgf1
chr18	39159863	39160240	78.84	17.31	13.66	intronic	Arhgap26
chr18	39384758	39385008	78.81	14.5	9.8	intronic	Arhgap26
chr18	39672906	39673156	69.18	18.9	12.15	intergenic	Nr3c1
chr18	40187853	40188103	59.66	12.73	14.66	intergenic	Yipf5
chr18	41913964	41914214	78.58	15.23	16.92	intergenic	Prelid2
chr18	42729459	42729709	56.78	4.03	6.33	intronic	Tcerg1
chr18	42904487	42904921	296.01	71.54	47.76	intronic	Ppp2r2b
chr18	43062590	43062840	64.21	10.76	18.4	intronic	Ppp2r2b
chr18	43063730	43064180	140.85	12.7	14.8	intronic	Ppp2r2b
chr18	43899567	43899960	143.67	36.55	16.83	intergenic	Spink3
chr18	45011304	45011754	159.83	31.54	40.63	intronic	Ythdc2
chr18	46663446	46663696	69.12	11.31	18.31	intergenic	Fem1c
chr18	46939933	46940183	49.91	3.75	6.79	intronic	Ap3s1
chr18	47287805	47288249	298.72	66.71	37.09	intergenic	Commd10
chr18	47323967	47324414	187.53	54	38.05	intergenic	Commd10
chr18	50187916	50188166	103.22	23.09	26.81	intronic	Tnfaip8
chr18	52780643	52780893	95.17	26.43	13.15	intronic	Zfp474
chr18	52826177	52826549	149.92	30.72	45.16	intergenic	1700034E13Rik
chr18	53602445	53603095	543.92	72.89	65.69	intergenic	Prdm6
chr18	53937510	53937760	111.95	23.49	21.42	intergenic	Cep120
chr18	53999486	53999736	62.54	15.91	12.4	intergenic	Csnk1g3
chr18	54337748	54338352	164.12	36.39	31.58	intergenic	Csnk1g3
chr18	54693539	54693789	124.03	36.34	23.69	intergenic	AK036466
chr18	54718653	54718903	54.03	10.02	9.49	intergenic	AK036466
chr18	54856122	54856740	250.59	51.81	43.83	intergenic	Zfp608
chr18	55929178	55929428	52.17	7.13	7.64	intergenic	Gramd3
chr18	56552259	56552509	101.52	24.91	11.01	intergenic	Gramd3
chr18	56645812	56646262	235.13	36.83	15.9	intronic	Gramd3
chr18	57964173	57964604	132.74	27.84	21.63	intergenic	AK036854
chr18	57974805	57975431	493.41	37.84	34.15	intergenic	AK036854
chr18	58624083	58624333	117.95	30.18	28.25	intergenic	Slc27a6
chr18	61435394	61435844	218.55	33.95	29.08	intronic	Pde6a
chr18	61514011	61514261	84.04	30.73	12.62	intronic	Ppargc1b
chr18	61580508	61580758	77.56	20.25	9.36	intergenic	Ppargc1b
chr18	61602365	61602615	68.56	18.78	13.98	intergenic	AK032118
chr18	62378520	62378947	187.88	50.88	51.01	intergenic	Gm9949
chr18	64060566	64060816	91.18	19.61	19.3	intronic	Wdr7
chr18	64137166	64137416	85.06	20.06	16.95	intronic	Wdr7
chr18	64266564	64266992	169.17	41.79	22.21	intergenic	BC048666
chr18	64290165	64290614	316.46	50.26	33.31	intergenic	BC048666
chr18	64551967	64552217	79.2	16.69	20.68	exonic	Onecut2
chr18	64561160	64561410	74.71	16.58	21.89	intergenic	Onecut2
chr18	65312525	65312775	253	54.86	35.42	intronic	Nedd4l
chr18	70426433	70427395	509.82	62.81	65.27	intergenic	2310002L13Rik
chr18	73922986	73923236	96.9	23.38	15.77	intergenic	Me2
chr18	74576271	74576899	194.46	23.81	25.95	intergenic	Myo5b
chr18	75110767	75111217	370.01	67.98	38.8	intronic	Lipg
chr18	75582436	75582875	264.13	55.26	76.91	intergenic	Gm672
chr18	76616089	76616339	122.62	21.61	12.37	intergenic	DQ548994
chr18	77943410	77943660	142.91	44.99	25.16	intronic	8030462N17Rik
chr18	78191712	78192154	439.43	52.81	42.09	intronic	5430411K18Rik
chr18	78300026	78300276	85.02	21.94	22.71	intronic	Slc14a1
chr18	78300424	78300873	323.67	49.83	41.21	exonic	Slc14a1
chr18	80349922	80350371	123.08	26.25	18.37	promoter	Adnp2
chr18	82198354	82198604	160.75	40.76	21.66	intergenic	AK046168
chr18	82617368	82617792	102.46	22.68	18.58	intergenic	Mbp
chr18	82856926	82857176	84.53	15.51	7.69	intronic	Zfp236
chr18	82980075	82980525	530.16	78.13	44.01	intergenic	AK015395
chr18	84551917	84552167	78.41	18.08	23.99	intronic	Zfp407
chr18	85100790	85101108	65.78	5.37	8.86	intergenic	Fbxo15
chr18	85166575	85166955	126.33	19.49	19.95	intergenic	Fbxo15
chr18	85168548	85168998	275.75	60.39	76.87	intergenic	Fbxo15
chr18	85169348	85170198	782.18	106.9	113.97	intergenic	Fbxo15
chr18	86864697	86865099	173.26	19.04	20.74	intergenic	Cbln2
chr18	86879986	86880236	213.01	42.86	57.72	promoter	Cbln2
chr19	6888840	6889290	229.64	53.96	44.27	intergenic	Rps6ka4
chr19	8673602	8674038	291.26	79.47	42.67	intronic	Slc22a8
chr19	10605217	10605467	97.17	29.1	15.33	intronic	Cpsf7
chr19	10712854	10713104	111.96	29.96	16.05	intronic	Vwce
chr19	12050223	12050473	106.37	18.01	13.99	promoter	Osbp
chr19	12682868	12683254	123.44	33.02	21.76	intronic	Gm4952
chr19	14407545	14407795	84.37	20.65	16.58	intergenic	AK083177
chr19	14448442	14448865	123.87	25.16	28.25	intergenic	AK083177
chr19	14463374	14463624	76.06	14.49	16.69	intergenic	AK083177
chr19	14607098	14607348	70.75	20.58	15.59	intronic	Tle4
chr19	16762394	16762768	89.84	17.17	27.16	exonic	Vps13a
chr19	18040001	18040366	74.72	15.65	19.02	intergenic	Pcsk5
chr19	18047140	18047390	127.4	34.14	20.67	intergenic	Pcsk5
chr19	18274719	18274969	86.46	11.32	18.31	intergenic	Pcsk5
chr19	26408062	26408442	100.57	27	17.63	intergenic	Smarca2
chr19	26550162	26550412	162.09	27.71	17.62	intergenic	Smarca2
chr19	26730476	26730726	84.8	18.01	19.29	intronic	Smarca2
chr19	26747130	26747380	96.48	25.36	26.25	exonic	Smarca2
chr19	27375073	27375495	236.42	23.63	26.18	intergenic	Kcnv2
chr19	27375589	27375839	159.48	15.28	12.81	intergenic	Kcnv2
chr19	27472063	27472313	67.78	14.95	12.41	intronic	D19Bwg1357e
chr19	27955694	27956119	120.44	14.77	24.14	intronic	Rfx3
chr19	28286119	28286569	396.93	41.48	34.73	intergenic	Glis3
chr19	28541519	28541769	100.38	23.58	22.97	intronic	Glis3
chr19	28642553	28642803	65.13	15.17	11.61	intronic	Glis3
chr19	29544005	29544655	293.23	72.5	49.38	exonic	A930007I19Rik
chr19	29825581	29825939	86.4	8.67	14.28	intronic	9930021J03Rik
chr19	30199725	30200175	267.57	31.8	28.74	intronic	Gldc
chr19	31936712	31936962	100.99	22.86	21.03	intergenic	A1cf
chr19	32606662	32606912	71.31	19.2	14.32	intergenic	Minpp1
chr19	32615207	32615827	298.78	50.2	63.25	intergenic	Minpp1
chr19	32636127	32636577	141.09	21.03	20.39	intergenic	Papss2
chr19	34137994	34138244	83	23	19.35	intergenic	Lipn
chr19	34199096	34199634	155.12	30.28	21.6	intronic	Ankrd22
chr19	34615249	34615739	155.62	17.92	11.41	intergenic	Ifit2
chr19	34753044	34753294	83.22	24.32	11.17	intronic	Slc16a12
chr19	34793055	34793489	153.55	32.04	29.04	intronic	Slc16a12
chr19	34923948	34924198	138.47	34.3	26.04	intronic	Pank1
chr19	35200281	35200531	80.96	18.74	26	intergenic	Kif20b
chr19	35281597	35282018	146.32	21.21	29.82	intergenic	Kif20b
chr19	35318645	35319243	466.74	58.41	69.43	intergenic	Kif20b
chr19	36403058	36403308	97.2	30.6	21.56	intergenic	Pcgf5
chr19	37317189	37317616	219.51	26.93	12.62	intergenic	DQ693081
chr19	37743873	37744295	263.08	79.98	37.46	intronic	Exoc6
chr19	38324013	38324263	70	17.35	11.23	intergenic	Lgi1
chr19	38324571	38324821	69.87	10.04	11.17	intergenic	Lgi1
chr19	38668876	38669126	52.69	8.97	8.95	intronic	Plce1
chr19	38759968	38760218	76.81	21.84	13.8	intronic	Plce1
chr19	39095978	39096228	104.89	24.77	26.31	intronic	Cyp2c55
chr19	39180806	39181187	130.74	18.64	28.76	intergenic	Cyp2c66
chr19	39303549	39303950	131.34	26.49	24.13	promoter	Cyp2c29
chr19	39345962	39346212	138.46	31.47	24.79	intronic	Cyp2c29
chr19	39357220	39357650	124.88	24.25	22.16	intronic	Cyp2c29
chr19	39504969	39505463	231.63	36.61	64.43	intronic	Cyp2c38
chr19	39537482	39537932	138.07	28.62	20.75	promoter	Cyp2c38
chr19	40307093	40307343	230.84	44.13	30.26	intronic	Pdlim1
chr19	40463530	40463980	549.03	104.93	41.18	intronic	Sorbs1
chr19	41095607	41096257	335.99	73.12	52.95	intergenic	AK082813
chr19	41394628	41394878	142.36	28.54	23.63	intronic	Pik3ap1
chr19	42035934	42036384	144.16	33.18	27.64	intronic	Mms19
chr19	42036538	42036979	137.19	31.03	22.26	intronic	Mms19
chr19	42536082	42536332	129.04	24.45	39.01	intergenic	Crtac1
chr19	42561840	42562090	90.75	21.81	19.03	intergenic	D19Ertd386e
chr19	43527609	43528059	263.36	76.44	43.24	intronic	Cnnm1
chr19	43895803	43896053	91.3	27.44	21.17	intronic	Abcc2
chr19	44048166	44048416	69.25	19.59	15.39	intronic	Cpn1
chr19	44088268	44088518	113.13	19.2	33.87	intronic	Cyp2c44
chr19	44110599	44110849	86.75	20.78	27.47	exonic	Erlin1
chr19	44974398	44974648	170.8	43.19	25.31	intergenic	Fam178a
chr19	46282562	46282812	72.59	20.64	14.29	intronic	Gbf1
chr19	47934980	47935230	88.2	22.56	17.36	intronic	D19Ertd652e
chr19	53478630	53478880	71.28	17.48	12.42	intergenic	Smndc1
chr19	53648562	53648952	130.94	31.86	40.75	intergenic	Smc3
chr19	53650458	53650901	199.43	38.26	30.4	intergenic	Smc3
chr19	53787782	53788203	166.97	32.54	32.23	intronic	Rbm20
chr19	54239928	54240326	152.31	25.77	34.15	intergenic	Adra2a
chr19	54488958	54489208	157.48	24.72	17.86	intergenic	Adra2a
chr19	54496530	54496980	491.33	46.15	47.54	intergenic	Adra2a
chr19	54806153	54806578	221.72	46.95	32.08	intergenic	Gpam
chr19	55515942	55516592	207.88	26.29	30.63	intronic	Vti1a
chr19	55624645	55624895	83.94	24.64	14.44	intronic	Vti1a
chr19	55672819	55673069	70.17	14.56	12.87	intronic	Vti1a
chr19	55743531	55743781	116.54	17.98	15.9	intergenic	Vti1a
chr19	55966147	55966565	250.65	22.97	27.93	intronic	Tcf7l2
chr19	56579994	56580244	167.99	35.55	13.88	intergenic	9930023K05Rik
chr19	56674556	56674806	152.48	25.11	23.25	promoter	BC055806
chr19	56791983	56792233	79	13.06	9.2	intergenic	Adrb1
chr19	56941667	56942117	196.03	60.46	31.31	intronic	Tdrd1
chr19	57404164	57404613	115.39	19.31	27.06	intronic	AK045643
chr19	57784611	57784861	56.16	9.68	16.32	intronic	Atrnl1
chr19	57868693	57868943	114.64	21.15	36.56	intronic	Atrnl1
chr19	58017820	58018171	94.02	16.66	19.81	intronic	Atrnl1
chr19	58856356	58856606	126.82	29.62	16.58	intergenic	1700019N19Rik
chr19	58985236	58985486	86.85	23.44	21.82	intronic	Hspa12a
chr19	60640581	60641026	237.56	48.01	33.39	intronic	2700078E11Rik
chr2	3258819	3259069	98.05	20.59	17.19	intergenic	Olah
chr2	3507891	3508141	156.79	40.46	23.54	intergenic	Cdnf
chr2	3805129	3805379	184.6	21.32	39.09	intergenic	Fam107b
chr2	3968819	3969069	65.13	13.42	19.78	intergenic	AK048013
chr2	4499905	4500155	101.97	21.89	17.02	intronic	Frmd4a
chr2	4858796	4859046	99.06	16.07	18.23	exonic	Phyh
chr2	4859090	4859487	206.76	38.97	16.39	exonic	Phyh
chr2	5093687	5094247	174.53	33.27	37.96	intronic	Ccdc3
chr2	5242262	5242704	214.72	44.35	40.43	intronic	Camk1d
chr2	5286039	5286469	161.32	28.4	18.89	intronic	Camk1d
chr2	5768855	5769105	73.99	20.46	8.94	intronic	Nudt5
chr2	5891321	5891692	82.8	19.1	11.4	intronic	Upf2
chr2	11258075	11258325	232.78	53.95	45.21	intergenic	AK140161
chr2	11284675	11284925	84.6	15.85	30.7	intergenic	AK140161
chr2	12895508	12895758	210.43	63.75	32.85	intronic	Pter
chr2	13514410	13514660	77.03	16.29	11.62	intergenic	Vim
chr2	14061123	14061373	128.88	38.27	25.05	intronic	Stam
chr2	14152395	14152806	232.06	47.69	33.9	intronic	Mrc1
chr2	17445282	17445694	173.18	29.01	36.68	intronic	Nebl
chr2	17453460	17453896	204.34	38.4	47.01	intronic	Nebl
chr2	20463672	20464278	313.97	36.1	30.88	intronic	Etl4
chr2	20851998	20852248	54.82	9.76	11.29	intronic	Arhgap21
chr2	25498603	25498853	122.92	36.6	22.22	intergenic	Lcn8
chr2	25514102	25514552	327.29	49.18	39.88	intronic	Lcn5
chr2	27059499	27059928	159.41	39.92	41.22	intronic	Sardh
chr2	29111637	29112056	161.86	28.06	24.7	intergenic	Ntng2
chr2	29557374	29557800	134.67	37.7	40.82	promoter	Rapgef1
chr2	31358640	31358890	101.68	25.5	19.83	intronic	Ass1
chr2	34275331	34275581	109.92	16.42	13.04	intronic	Mapkap1
chr2	35502340	35502590	173.9	26.93	13.98	intronic	Dab2ip
chr2	37873786	37874036	108.26	27.65	22.31	promoter	AK052627
chr2	38479435	38479685	108.03	23.02	23.05	intronic	Psmb7
chr2	38649107	38649357	77.43	21.08	21.02	intronic	Nr6a1
chr2	39032294	39032738	178.73	33.05	23.9	intronic	Scai
chr2	42397941	42398421	127.08	24.94	17.41	intronic	Lrp1b
chr2	44557003	44557440	121.68	25.82	20.25	intronic	Gtdc1
chr2	44890243	44890493	145.56	23.25	20.29	intronic	Zeb2
chr2	45078401	45078651	70.95	12.6	13.17	intergenic	U09772
chr2	48027261	48027705	178.42	39.06	22.95	intergenic	Acvr2a
chr2	48047177	48047427	88.56	15.85	9.94	intergenic	Acvr2a
chr2	48193702	48194081	98.61	29.67	19.53	intergenic	Acvr2a
chr2	48260187	48260437	206.14	43.22	21.61	intergenic	Acvr2a
chr2	49403890	49404500	390.68	86.38	51.28	exonic	Epc2
chr2	51421447	51421873	209.22	41.63	36.6	intergenic	Tas2r134
chr2	51455212	51455462	67.15	17.65	15.22	intergenic	Tas2r134
chr2	51485714	51485964	100.64	25.42	26.79	intergenic	Tas2r134
chr2	51499477	51499727	85.71	20.28	17.04	intergenic	Tas2r134
chr2	51502287	51502537	172.24	38.06	36.21	intergenic	Tas2r134
chr2	51537190	51537640	171.26	35.46	36.75	intergenic	Tas2r134
chr2	51538938	51539188	64.86	15.93	18.75	intergenic	Tas2r134
chr2	51581441	51582091	377.88	48.53	52.89	intergenic	Tas2r134
chr2	51599966	51600413	286.53	36.21	28.05	intergenic	Tas2r134
chr2	51706922	51707172	117.13	16.47	18.52	intergenic	Rbm43
chr2	51708238	51708629	127.04	22.28	29.91	intergenic	Rbm43
chr2	52341757	52342200	237.56	51.21	38.02	intronic	Cacnb4
chr2	52750778	52751028	74.42	19.74	17.07	intronic	Fmnl2
chr2	52811260	52811697	188.96	38.32	32.47	intronic	Fmnl2
chr2	57063648	57063898	139.12	42.04	23.1	intergenic	AK044432
chr2	58275596	58275846	86.66	17.91	17.26	intergenic	Acvr1
chr2	58498511	58498961	214.29	47.23	38.51	intronic	Upp2
chr2	59100061	59100311	71.96	14.89	20.61	intronic	Pkp4
chr2	59289626	59290431	416.64	48.05	46.56	intergenic	Dapl1
chr2	59889153	59889403	76.62	14.34	16.66	intronic	Baz2b
chr2	59964907	59965157	76.54	17.28	18.2	promoter	Baz2b
chr2	60191194	60191444	91.24	15.46	19.44	intronic	AK050909
chr2	60194832	60195282	142.66	28.88	36.4	intronic	Ly75
chr2	60274299	60274549	65.91	18.41	13.09	intronic	Pla2r1
chr2	60282739	60283149	109.63	22.3	19.91	intronic	Pla2r1
chr2	60489603	60489853	115.66	28	22.2	intronic	Itgb6
chr2	61672537	61672787	61.46	6.92	5.09	intergenic	Tbr1
chr2	62538171	62538421	109.11	24.12	28.22	intergenic	Kcnh7
chr2	62928487	62928737	77.66	10.86	17.63	intronic	Kcnh7
chr2	68030617	68031049	177.93	45.51	47.94	intergenic	Stk39
chr2	68079811	68080061	56.65	13.23	13.93	intronic	Stk39
chr2	68547304	68547744	140.56	28.57	23	intronic	4932414N04Rik
chr2	68584064	68584445	92.65	14.04	14.7	intronic	4932414N04Rik
chr2	68851412	68851862	110.81	23.88	20.23	intronic	Lass6
chr2	69181076	69181326	91.53	25.48	24.03	promoter	Abcb11
chr2	70320599	70320971	90.03	17.47	10.23	intergenic	Sp5
chr2	70573539	70573952	195.22	29.98	32.86	intronic	Tlk1
chr2	70602832	70603082	109.83	26.71	29.95	intronic	Tlk1
chr2	71139470	71139720	218.44	15.91	11.87	intronic	Slc25a12
chr2	71892067	71892917	534.45	87.66	113.41	promoter	Rapgef4
chr2	72791017	72791405	89.31	19.5	23.09	intronic	Sp3
chr2	72872069	72872319	65.36	13.97	10.53	intergenic	AK010824
chr2	73197957	73198499	358.97	62.08	60.21	intronic	Gpr155
chr2	73338867	73339302	496.32	83.51	46.84	intronic	Wipf1
chr2	73837244	73837691	187.53	20.9	20.48	intergenic	Atp5g3
chr2	77402015	77402265	66.92	11.13	12.72	intronic	Zfp385b
chr2	84236398	84236770	77.7	10.83	10.13	intronic	Calcrl
chr2	90440532	90440982	176.63	34.08	19.32	intergenic	Ptprj
chr2	91228921	91229171	78.93	9.74	10.79	intronic	1110051M20Rik
chr2	91700573	91700823	123.21	29.39	27.07	intronic	Ambra1
chr2	101588007	101588257	124.85	24.47	22.75	intronic	Prr5l
chr2	101601076	101601501	256.32	40.94	22.11	intronic	Prr5l
chr2	102664935	102665185	90.95	33.92	14.95	intronic	Cd44
chr2	103282322	103282572	93.6	29.35	18.73	intronic	Elf5
chr2	103881127	103881527	110.85	21.09	24.93	intronic	Fbxo3
chr2	103972220	103972470	88.95	19.84	22.19	intergenic	A930018P22Rik
chr2	104423360	104423610	76.51	16.98	15.29	intergenic	Cstf3
chr2	106602667	106603517	299.65	66.77	63.62	intronic	Mpped2
chr2	106723743	106723993	105.25	22.16	17.02	intergenic	Mpped2
chr2	109110784	109111142	90.78	21.99	15.99	intronic	Mett5d1
chr2	110165162	110165412	87.02	23.75	20.31	intergenic	Bbox1
chr2	112376583	112376833	122.66	22.87	45.23	intronic	Aven
chr2	112490623	112491233	341.2	53.3	69.67	intronic	Ryr3
chr2	112497118	112497546	103.94	20.11	27.12	intronic	Ryr3
chr2	112513910	112514715	602.33	87.1	95.05	intronic	Ryr3
chr2	114406464	114406714	88.85	30.37	16.43	intronic	Atpbd4
chr2	115144583	115144833	56.91	5.47	8.35	intergenic	AK019710
chr2	115807064	115807492	303.47	49.17	46.46	intronic	Meis2
chr2	115841316	115841566	90.58	21.15	24.54	intronic	Meis2
chr2	115875364	115875614	74.19	14.36	22.69	intronic	Meis2
chr2	115878779	115879029	61.62	13.96	6.97	intronic	Meis2
chr2	118126583	118127033	213.08	22.89	27.29	intronic	Gpr176
chr2	118885928	118886250	73.41	12.75	11.96	intronic	Casc5
chr2	120482568	120482818	169.1	25	26.51	intergenic	Stard9
chr2	121174308	121174754	175.25	44.67	32.97	exonic	Ppip5k1
chr2	122547669	122547919	66.79	16.01	13.94	intergenic	AK166060
chr2	124365426	124365762	77.14	16.72	17.12	intronic	Sema6d
chr2	124382561	124382967	105.25	21.65	21.64	intronic	Sema6d
chr2	124754461	124754893	141.77	44.71	25.46	intergenic	Slc24a5
chr2	124952537	124952907	132.02	27.5	46.43	intergenic	Myef2
chr2	125646338	125646588	77.96	17.96	21.23	intergenic	Cops2
chr2	126197352	126197802	106.2	26.54	34.24	exonic	Atp8b4
chr2	127687167	127687417	75.17	18.29	19.19	intronic	Acoxl
chr2	127687836	127688286	224.9	41.58	21.03	intronic	Acoxl
chr2	127995481	127996109	207.16	47.42	38.07	intergenic	Bcl2l11
chr2	130677554	130678004	209.35	27.64	37.13	intergenic	4930402H24Rik
chr2	132058135	132058385	123.74	24.71	19.82	intergenic	5730494N06Rik
chr2	133242859	133243294	240.76	35.12	43.43	intergenic	AK040035
chr2	134815428	134815862	365.61	77.61	62.3	intronic	Plcb1
chr2	136777971	136778421	246.91	62.6	63.91	intronic	2210009G21Rik
chr2	137140218	137140639	466.83	80.83	50.82	intergenic	Jag1
chr2	139825652	139825902	87.64	18.22	19.52	intronic	Tasp1
chr2	140973985	140974435	130.03	14.72	16.62	intronic	Macrod2
chr2	141164751	141165001	82.05	19.81	13.92	intronic	Macrod2
chr2	144117353	144117803	226.4	48.05	23.43	intergenic	8430406I07Rik
chr2	144318123	144318573	108.82	25.61	23.73	intronic	6330439K17Rik
chr2	144370630	144370880	117.22	31.84	17.35	intronic	Rbbp9
chr2	146268353	146268603	122.95	24.83	29.26	intronic	Ralgapa2
chr2	146525719	146526369	227.84	50.39	26.58	intergenic	Plk1s1
chr2	147849966	147850390	359.85	26.53	23.72	intergenic	Foxa2
chr2	148661839	148662089	78.97	15.67	9.01	intronic	Cst9
chr2	152375919	152376169	123.25	35.76	24.32	intergenic	Defb29
chr2	152797499	152797749	100.34	21.2	23.84	intronic	Ttll9
chr2	152965019	152965269	109.96	27.05	26.27	intronic	Hck
chr2	153634679	153635125	292.6	78.78	46.85	intergenic	Efcab8
chr2	154173908	154174294	75.5	21.53	16.32	intronic	Cdk5rap1
chr2	155717177	155717691	126.22	26.92	23.06	intronic	Uqcc
chr2	156624120	156624570	169.59	55.46	25.9	intergenic	Myl9
chr2	158144352	158144602	162.2	33.96	23.17	intronic	Lbp
chr2	158677764	158678014	93.14	23.15	23.13	intronic	Dhx35
chr2	160624139	160624389	72.55	11.35	14.97	intronic	Zhx3
chr2	160658187	160658437	123.48	29.5	17.66	promoter	Zhx3
chr2	160682867	160683250	95.59	29.48	27.48	intronic	Zhx3
chr2	160830015	160830437	299.11	38.06	56.09	intronic	Chd6
chr2	162517671	162518321	271.27	57.64	38.61	intergenic	9430021M05Rik
chr2	162708006	162708445	317.7	80.82	47.51	intergenic	Srsf6
chr2	163167898	163168148	274.28	35.96	29.3	intronic	Jph2
chr2	164526189	164526769	334.49	43.47	37.31	exonic	Spint4
chr2	164544676	164544926	84.7	18.95	18.49	intergenic	Gm14316
chr2	166071908	166072358	342.36	47.59	30.46	intergenic	Gm11468
chr2	166113397	166113835	231.77	41.13	42.61	intronic	Gm11468
chr2	166786226	166786656	278.63	66.95	58.08	intronic	Stau1
chr2	167216956	167217206	68.86	14.96	6.2	intergenic	Slc9a8
chr2	169893361	169893611	156.36	33.73	13.85	intronic	A630075F10Rik
chr2	173618104	173618354	163.56	40.35	19.43	intergenic	Vapb
chr2	173876567	173876817	144.23	33.93	27.08	intergenic	Stx16
chr2	173985918	173986168	180.81	49.11	29.98	intergenic	Npepl1
chr2	173987308	173987758	180.87	46.65	34.74	intergenic	Npepl1
chr2	178882672	178883115	314.67	62.25	42.26	intergenic	AK019836
chr2	179886909	179887159	93.76	18.78	18.9	intronic	Osbpl2
chr2	179887309	179887559	67.45	12.81	10.15	intronic	Osbpl2
chr3	15089021	15089433	115.62	16.94	22.18	intergenic	AK020793
chr3	15098146	15098796	371.33	46.92	36.78	intergenic	AK020793
chr3	15107293	15107701	169.04	27.57	40.02	intergenic	AK020793
chr3	15157753	15158196	237.36	26.52	38.15	intergenic	Gm9733
chr3	15163519	15163769	92.81	10.16	12.19	intergenic	Gm9733
chr3	17687284	17687534	72.91	12.81	20.07	intergenic	2610100L16Rik
chr3	19347882	19348132	163.4	28.59	36.95	intergenic	Dnajc5b
chr3	19849465	19849915	178.13	23.63	34.74	intergenic	Cp
chr3	19865396	19865646	62.51	8.83	7.03	intronic	Cp
chr3	20964577	20964978	103.45	7.4	13.63	intergenic	AB345949
chr3	21193615	21194157	281.38	58.6	48.54	intergenic	AK080657
chr3	21333367	21333617	165.39	20.82	20.97	intergenic	AK080657
chr3	21548843	21549293	160.79	43.3	34.71	intergenic	AK080657
chr3	24452770	24453020	107.21	8.23	9.79	intergenic	Naaladl2
chr3	24820348	24820719	114.74	20.02	23.87	intergenic	Nlgn1
chr3	26867805	26868377	175.18	32.04	27.18	intronic	Spata16
chr3	27059501	27059882	105.7	18.02	16.84	intergenic	Ect2
chr3	27306131	27306554	137.52	18.47	31.58	intergenic	Fndc3b
chr3	27314714	27315136	205.03	62.31	35.84	exonic	Fndc3b
chr3	27323261	27323511	89.84	17.97	17.62	intronic	Fndc3b
chr3	27369551	27369801	246.49	55.06	27.66	intronic	Fndc3b
chr3	27668449	27668699	153.56	29.81	28.49	intergenic	Fndc3b
chr3	28095721	28095971	165.26	37.93	22.13	intergenic	Pld1
chr3	28108331	28108721	155.98	28.19	17	intergenic	Tnik
chr3	28624245	28624495	63.49	11.59	12.56	intronic	Slc2a2
chr3	28624607	28625038	116.7	29.7	26.89	intronic	Slc2a2
chr3	28636097	28636347	138.43	33.7	16.64	intergenic	AK007174
chr3	28676201	28676451	86.53	25.78	13.74	intronic	AK007174
chr3	29733805	29734255	160.98	25.45	29.37	intergenic	AK147070
chr3	29962388	29962638	66.89	11.07	4.88	intronic	Mecom
chr3	30456865	30457115	123.21	33.9	15.55	intergenic	Mecom
chr3	30626225	30626475	179.08	47.47	33.34	intergenic	Samd7
chr3	31802331	31802781	336.72	59.53	40.92	intronic	Kcnmb2
chr3	33751979	33752414	120.86	20.41	34.32	intergenic	Ccdc39
chr3	33759738	33759988	77.86	15.4	21.24	intergenic	Ccdc39
chr3	33770715	33770965	176.66	29.1	37.99	intergenic	Ccdc39
chr3	33773575	33774019	495.12	56.61	36.18	intergenic	Ccdc39
chr3	33774351	33774601	113.14	31.46	28.11	intergenic	Ccdc39
chr3	33777114	33777364	64.63	16.12	12.94	intergenic	Ccdc39
chr3	33793173	33793423	69.55	16.55	14.64	intergenic	Ccdc39
chr3	33804317	33804753	166.15	33.02	37.73	intergenic	Ccdc39
chr3	37100034	37100284	134.47	19.73	16.95	intergenic	Il21
chr3	38361039	38361489	179.01	30.63	41.15	intronic	Ankrd50
chr3	40847940	40848390	296.53	35.68	36.39	intergenic	Larp1b
chr3	40904183	40904433	139.18	36.84	22.2	intergenic	Pgrmc2
chr3	40989722	40989972	133.07	27.48	26.41	intergenic	AY512943
chr3	41079271	41079897	309.99	33.67	33.13	intergenic	AY512943
chr3	41080023	41080273	103.29	18.19	24.31	intergenic	AY512943
chr3	41214812	41215062	63.85	19.54	9.61	intergenic	AK006766
chr3	51174361	51174611	102.11	32.07	14.5	intergenic	AK042136
chr3	52044688	52045523	567.3	92.93	85.51	intergenic	Foxo1
chr3	52396046	52396296	76.52	19.29	22.41	intergenic	AK040671
chr3	54923244	54923694	421.6	65.93	82.27	intronic	Spg20
chr3	54950275	54950657	103.58	29.96	30.17	intronic	A730037C10Rik
chr3	57278029	57278279	77.2	12.08	23.81	intronic	Wwtr1
chr3	57278403	57278840	334.38	30.03	44.02	intronic	Wwtr1
chr3	57310823	57311073	65.06	13.87	16.8	intronic	Wwtr1
chr3	57387592	57388042	203.07	35.43	32.37	intergenic	Wwtr1
chr3	57407771	57408221	160.49	34.37	36.37	intergenic	AK040865
chr3	57415774	57416024	103.68	24.03	17.55	intergenic	AK040865
chr3	57429117	57429367	89.67	17.89	23.56	intronic	AK040865
chr3	59861524	59861774	112.74	29.36	26.14	intergenic	Aadac
chr3	60562496	60562932	182.35	37.2	42.42	intergenic	Ube2v1
chr3	60592124	60592374	90.22	21.9	27.6	intergenic	Ube2v1
chr3	60855770	60856020	62.64	9.97	6.4	intergenic	P2ry1
chr3	62203380	62203810	91.01	23.08	14.47	intronic	Arhgef26
chr3	63043703	63043953	61.27	9.21	14.5	intergenic	Mme
chr3	63097757	63098007	74.42	11.34	13.34	promoter	Mme
chr3	65200854	65201104	84.24	22.37	20.32	intergenic	Ssr3
chr3	65223656	65223906	114.77	28.18	14.3	intergenic	Ssr3
chr3	68362617	68363048	147.3	34.45	28.5	intronic	Iqcj-schip1
chr3	69067210	69067638	269.51	54.52	54.49	intergenic	Arl14
chr3	69084172	69084422	96.19	20.66	8.91	intergenic	Ppm1l
chr3	69125267	69125807	222.54	36.03	36.74	intronic	Ppm1l
chr3	69137705	69138147	143.64	30.43	31.25	intronic	Ppm1l
chr3	69478021	69478271	115.65	16.47	26.94	intergenic	Nmd3
chr3	69577313	69577563	106.75	24.23	28.87	intergenic	Nmd3
chr3	69678310	69678560	86.89	18.69	11.48	intergenic	1110032A04Rik
chr3	78966906	78967156	83.68	19.91	17.45	intronic	Rapgef2
chr3	79321138	79321388	69.42	7.76	14.85	intronic	Fnip2
chr3	79342335	79342585	90.91	27.54	19.54	intronic	Fnip2
chr3	80649448	80649698	56.25	8.77	9.66	intronic	Glrb
chr3	82731758	82732160	191.35	61.23	29.18	intergenic	AK015378
chr3	82737876	82738126	132.77	35.83	21.2	intergenic	AK015378
chr3	82754646	82755055	91.44	24.13	25.84	intergenic	AK015378
chr3	83657178	83657808	246.3	27.65	28.74	intergenic	Tlr2
chr3	86252909	86253280	96.45	16.23	18.44	intronic	Lrba
chr3	97055383	97055633	122.07	36.67	24.97	intergenic	Bcl9
chr3	100351524	100351774	402.54	103.04	82.44	intergenic	Man1a2
chr3	101452339	101452589	153.78	35.11	36.16	intergenic	Atp1a1
chr3	103139187	103139437	70.95	20.28	17.94	intronic	Trim33
chr3	104893006	104893438	183.07	43.49	36.98	intergenic	Cttnbp2nl
chr3	105562987	105563237	65.94	16.97	10.43	intronic	Rap1a
chr3	107752546	107752796	65.16	18.78	8.54	intergenic	Gstm6
chr3	107764840	107765171	76.12	9.52	2.41	intergenic	Gstm3
chr3	107785667	107786117	197.99	29.35	28.39	intronic	Gstm2
chr3	108540668	108541158	166.05	51.82	27.13	promoter	Aknad1
chr3	108613681	108613931	126.91	30.88	32	intronic	Stxbp3a
chr3	108730206	108730630	93.24	21.4	16.66	intergenic	4921515J06Rik
chr3	108933397	108933847	215.67	30.85	30.8	intronic	Slc25a24
chr3	116239120	116239770	400.12	45.89	55.77	intronic	Dbt
chr3	118332990	118333377	155.68	33.85	41.91	intronic	Dpyd
chr3	121203822	121204072	175.51	38.88	43.15	intronic	Slc44a3
chr3	121810476	121810726	88.13	23.36	24.1	intronic	Abca4
chr3	122361732	122362165	95.1	15.84	15.97	intergenic	Fnbp1l
chr3	122471793	122472043	97.1	9.53	7.79	intronic	Pde5a
chr3	126151971	126152397	292.05	18.6	19.23	intergenic	Arsj
chr3	127942946	127943380	175.38	31.27	29.42	intergenic	AK050844
chr3	129439507	129439757	90.1	20.3	23.27	exonic	Egf
chr3	129605343	129605987	254.25	56.46	42.29	intronic	Casp6
chr3	129922620	129922870	67.02	21.35	9.56	intronic	Col25a1
chr3	130118967	130119356	111.69	31.97	20.9	intronic	Col25a1
chr3	130652329	130652979	391.91	60.59	47.56	intergenic	Lef1
chr3	130675044	130675294	184.44	45.49	38.58	intergenic	Lef1
chr3	130675410	130675843	220.18	33.29	39.5	intergenic	Lef1
chr3	131255056	131255306	111.41	30.2	25.16	intronic	Papss1
chr3	134951023	134951822	470.47	107.84	52.34	exonic	Bdh2
chr3	135176800	135177050	94.64	22.87	15.86	intronic	Manba
chr3	136344705	136345321	373.96	49.22	39.07	intronic	Ppp3ca
chr3	136609938	136610188	85.91	20.83	15.83	intergenic	Ppp3ca
chr3	137641276	137641526	81.35	22.95	16.54	intronic	Dapp1
chr3	138036569	138037014	135.58	31.33	25.79	promoter	Adh6-ps1
chr3	138440928	138441178	80.8	21.52	9.18	intronic	Tspan5
chr3	141964713	141965083	99.07	20.48	20.58	exonic	Pdlim5
chr3	142104078	142104479	126.03	32.17	22.72	intergenic	Pdlim5
chr3	142160939	142161189	74.39	14.38	21.95	intronic	Gbp5
chr3	142741395	142741821	184.67	19.91	18.04	intergenic	AK043679
chr3	143949155	143949405	72.88	15.28	25.59	intergenic	Lmo4
chr3	144037500	144037750	116.35	34.27	18.81	intergenic	Hs2st1
chr3	144174875	144175125	116.09	21.44	30.7	intronic	Hs2st1
chr3	145753917	145754167	95	25.04	20.39	intronic	Wdr63
chr3	145967438	145968288	473.61	54.81	60.65	intergenic	Lpar3
chr3	147900285	147900535	70.69	20.96	11.41	intergenic	Lphn2
chr3	148737766	148738016	104.59	28.32	26.54	intergenic	Lphn2
chr3	148768154	148768604	133.56	24.48	16.94	intergenic	Lphn2
chr3	148831140	148831390	111.5	23.97	24.44	intergenic	AK133793
chr4	3444612	3444862	213.41	61.43	30.79	intergenic	Tmem68
chr4	5672732	5673119	86.43	13.97	20.9	intronic	Fam110b
chr4	8038971	8039221	109.08	23.22	23.26	intergenic	Car8
chr4	8039349	8039599	77.3	11.73	12.24	intergenic	Car8
chr4	8208232	8208482	82.31	18.84	22.77	intergenic	Car8
chr4	8450470	8450894	256.38	36.08	49.56	intergenic	Rab2a
chr4	9007116	9007366	172.1	27.75	24.98	intergenic	Clvs1
chr4	10787844	10788294	245.96	24.44	30.42	intergenic	2610301B20Rik
chr4	10849134	10849540	137.09	29.55	22.08	intergenic	2610301B20Rik
chr4	11301938	11302388	222.12	59.49	48.93	intronic	Esrp1
chr4	11573961	11574211	109.7	30.26	17.53	intergenic	Rad54b
chr4	13389035	13389414	102.53	10.55	10.85	intergenic	AK002417
chr4	14949326	14949770	603.59	27	72.77	intronic	Necab1
chr4	15248807	15249365	250.91	24.13	37.62	intergenic	Tmem64
chr4	19418383	19418957	235.93	47.92	37.61	intronic	Cngb3
chr4	19607914	19608164	67.32	5.95	9.95	intronic	Wwp1
chr4	23527193	23527443	71.08	16.67	15.02	intergenic	AK136028
chr4	29019566	29019932	103.38	27.56	21.21	intergenic	Epha7
chr4	29347494	29347744	74.29	10.12	16.77	intergenic	Epha7
chr4	32979042	32979292	194	44.48	41.83	intronic	Ankrd6
chr4	34815122	34815372	77.17	19.6	17.25	intronic	Zfp292
chr4	40334526	40334954	164.05	43.54	36.73	intergenic	Tmem215
chr4	45409616	45409962	78.84	11.83	9.94	exonic	Mcart1
chr4	46416831	46417081	85.22	21.87	10.52	promoter	Hemgn
chr4	46417591	46417841	166.22	40.88	39.43	promoter	Hemgn
chr4	48193196	48193446	65.06	10.21	11.14	intronic	Stx17
chr4	48208012	48208411	128.84	26.08	33.59	intronic	Erp44
chr4	48629166	48629416	79.03	19.27	22.28	intronic	Tmeff1
chr4	53062160	53062410	79.3	17.93	11.03	intronic	Abca1
chr4	53295283	53295683	122.33	24.5	23.58	intergenic	AI427809
chr4	55116546	55116796	292.81	22.3	20.96	intergenic	Zfp462
chr4	55294580	55294830	166.93	39.02	42.1	intergenic	Rad23b
chr4	56519042	56519292	109.57	22.6	16.36	intergenic	Actl7b
chr4	58021188	58021638	116.84	22.71	27.49	intronic	Txndc8
chr4	58521789	58522224	193.48	44.46	31.7	intronic	Lpar1
chr4	58574383	58574633	106.92	15.55	12.66	intergenic	Lpar1
chr4	58625843	58626264	173.68	40.38	36.16	intergenic	Lpar1
chr4	58978043	58978492	314.11	57.81	74.98	exonic	Ptgr1
chr4	59477483	59477896	102.56	28.46	25.75	intergenic	Rod1
chr4	59845739	59846173	282.5	63.34	54.11	intronic	Snx30
chr4	62724422	62724854	123.47	27.65	30.88	intronic	Zfp618
chr4	63359086	63359336	58.16	8.13	8.44	intergenic	Tnfsf15
chr4	70952819	70953069	115.91	35.96	24.51	intergenic	Megf9
chr4	75587583	75587833	263.08	41.44	17.49	exonic	Ptprd
chr4	76587626	76588055	104.56	13	25.76	intronic	Ptprd
chr4	81639271	81639637	140.3	31.47	23.68	intergenic	Nfib
chr4	82086528	82086778	101.15	19.19	11.49	intronic	Nfib
chr4	82239562	82239812	142.13	27.32	40.38	intergenic	Nfib
chr4	82287041	82287291	229.24	33.34	43.59	intergenic	Nfib
chr4	82289438	82289866	287.91	47.11	44.13	intergenic	Nfib
chr4	82340972	82341222	145.01	19.53	15.44	intergenic	Zdhhc21
chr4	82897950	82898388	179.8	26.19	43.59	intronic	Ttc39b
chr4	83301272	83301679	192.34	42.96	33.71	exonic	4930473A06Rik
chr4	86226336	86226719	102.1	23.54	33.71	intergenic	Haus6
chr4	86318303	86318736	130.58	31.31	17.73	intergenic	Plin2
chr4	87521037	87521287	82.86	15.87	13.11	promoter	Mllt3
chr4	87637544	87637955	259.64	52.07	31.23	intronic	Mllt3
chr4	88554295	88554545	78.31	25.75	11.26	intergenic	Mir31
chr4	94419963	94420213	261.05	43.99	27.15	intronic	Tek
chr4	95022785	95023227	167.95	27.02	50.15	intergenic	AK157456
chr4	95264027	95264277	117.71	28.03	21.91	intronic	Fggy
chr4	96386186	96386436	80.61	16.39	21.16	intergenic	Gm12695
chr4	98662593	98663043	189.1	27.54	43.06	intronic	Dock7
chr4	98943080	98943676	410.82	45.24	44.75	intergenic	Atg4c
chr4	100919882	100920132	86.63	29.1	16.74	intronic	Jak1
chr4	101952134	101952569	126.12	12.46	13.64	intronic	Pde4b
chr4	102060677	102061113	125.28	33.6	23.37	intronic	Pde4b
chr4	102098279	102098714	281.67	53.21	34.77	intronic	Pde4b
chr4	104448290	104448540	111.53	31.2	24.06	intronic	C8b
chr4	104464591	104464841	98.08	24.06	9.76	intronic	C8b
chr4	104488912	104489486	262.13	44.09	38.71	exonic	C8a
chr4	104511119	104511369	166.93	32.83	14.49	intronic	C8a
chr4	104518121	104518371	69.21	16.13	13.91	intronic	C8a
chr4	104536247	104536682	134.41	25.77	23.58	intronic	C8a
chr4	105835912	105836354	197.97	54.67	34.16	intergenic	Usp24
chr4	105925324	105925574	89.47	24.54	16.54	intergenic	Usp24
chr4	106104927	106105290	83.71	19.03	20.61	intronic	Usp24
chr4	106539535	106539785	351.35	82.9	75.67	intergenic	Ssbp3
chr4	106611155	106611405	109.21	34.68	22.76	intronic	Ssbp3
chr4	106714012	106714262	116.76	36.63	24.01	intronic	Ssbp3
chr4	111092133	111092383	133.12	32.39	32.31	intronic	Bend5
chr4	111125032	111125282	203.94	40.16	35.87	intronic	Bend5
chr4	111156024	111156274	56.71	7.86	12.33	intronic	Agbl4
chr4	111203107	111203557	152.67	26	48.04	intronic	Agbl4
chr4	115183404	115183839	127.01	24.27	30.91	intergenic	Cyp4a10
chr4	115186677	115186927	100.7	26.91	23.02	intergenic	Cyp4a10
chr4	115190602	115191052	243.67	46.51	62.11	promoter	Cyp4a10
chr4	115236057	115236307	74.26	12.99	24.65	promoter	Cyp4a10
chr4	115255669	115256072	134.6	36.58	33.22	promoter	Gm12839
chr4	115273179	115273729	310.27	34.09	52.28	promoter	Cyp4a32
chr4	117703707	117703957	127.35	29.37	18.16	intronic	St3gal3
chr4	120361922	120362172	304.05	63.03	28.9	intergenic	Kcnq4
chr4	122770415	122770856	322.91	63.18	86.71	intergenic	Bmp8b
chr4	126037330	126037738	202.92	20.83	15.06	intronic	Eif2c3
chr4	126160231	126160626	198.45	41.09	36.73	intergenic	Eif2c4
chr4	128386720	128386970	292.34	62.8	54.41	promoter	Phc2
chr4	133460007	133460410	154.93	26.58	15.23	intergenic	Rps6ka1
chr4	133495092	133495342	69.97	10.93	10.67	intergenic	Hmgn2
chr4	134185210	134185460	71.74	18.56	13.81	intronic	Man1c1
chr4	134916094	134916467	94.32	30.49	16.15	intergenic	Srrm1
chr4	136830311	136830561	194.88	30.67	30.6	intergenic	Wnt4
chr4	136832348	136832598	181.89	41.96	42.79	promoter	Wnt4
chr4	137528784	137529213	226.66	40.7	26.28	intergenic	Ece1
chr4	137533034	137533474	219.82	33.62	20.79	intergenic	Ece1
chr4	137537259	137537681	247.64	33.27	23.02	intergenic	Eif4g3
chr4	141069552	141069802	83.09	25.67	18.21	intronic	Spen
chr4	144649126	144649376	78.67	17.67	20.95	intronic	Vps13d
chr4	148119961	148120392	108.2	22.95	14.63	intergenic	Casz1
chr4	148980845	148981495	338.88	62.07	46.17	intronic	Clstn1
chr4	149256337	149256587	118.43	36.2	16.33	intergenic	Spsb1
chr4	150064073	150064323	149.33	35.96	33.5	intergenic	Slc45a1
chr4	150079505	150079755	111.17	26.27	22.74	intergenic	Slc45a1
chr4	150375948	150376198	95.33	25.25	19.54	intergenic	Uts2
chr4	153815515	153815953	297.06	47.5	29.65	intronic	Prdm16
chr4	153845472	153845922	721.06	124.53	77	intronic	Prdm16
chr4	153882853	153883293	210.46	63.83	46.21	intronic	Prdm16
chr4	153890707	153891153	175.9	41.41	39.05	intronic	Prdm16
chr4	153915760	153916010	270.15	42.04	40.44	intronic	Prdm16
chr4	153956884	153957334	265.44	67.7	58.17	intronic	Prdm16
chr4	153966613	153967063	742.12	108.69	81.71	intronic	Prdm16
chr4	153985210	153985460	205.16	35.88	31.08	intronic	Prdm16
chr4	153999709	153999959	165.98	29.16	28.43	intronic	Prdm16
chr4	155388671	155389105	238.61	62.86	44.95	exonic	Tnfrsf4
chr5	3141445	3141888	129.04	27.69	34.5	intergenic	V1rg10
chr5	3773516	3773766	93.33	22.18	17.48	promoter	Ankib1
chr5	8014259	8014693	123.25	22.4	20.72	intergenic	Sri
chr5	8085303	8085709	148.19	43.88	31.3	intronic	Adam22
chr5	9047223	9047647	216.06	61.65	35.25	intergenic	Crot
chr5	11511944	11512290	82.31	7.27	6.86	intergenic	Gm6460
chr5	11854748	11855113	118.8	8.46	7.76	intergenic	4933402N22Rik
chr5	17160280	17160530	97.33	30.65	16.41	intronic	Sema3c
chr5	17410591	17410969	102.04	12.19	21.43	intergenic	Cd36
chr5	22553738	22553988	82.28	18.93	18.79	intronic	Lhfpl3
chr5	23406454	23406704	148.21	21.08	19.91	intergenic	Fam126a
chr5	23406820	23407070	68.5	15.85	13.06	intergenic	Fam126a
chr5	24758932	24759375	456.16	108.4	69.63	intronic	Galnt11
chr5	28273345	28273733	132.6	35.76	21.49	intergenic	Htr5a
chr5	28295257	28295681	121.61	23.9	14.18	intergenic	Insig1
chr5	28555061	28555311	102.43	30.92	17.94	intronic	Cnpy1
chr5	28602930	28603180	142.43	35.07	23.34	intergenic	Cnpy1
chr5	28617206	28617456	120.07	26.09	34.16	intergenic	Rbm33
chr5	28617773	28618212	227.41	64.16	41.62	intergenic	Rbm33
chr5	28751514	28751957	150.21	25.83	25.96	intergenic	Rbm33
chr5	29219429	29219679	114.71	24.9	23.4	intronic	9530036O11Rik
chr5	30299977	30300397	318.13	40.72	80.5	intronic	AK039125
chr5	30972506	30972756	98.31	31.51	18.81	intronic	Cenpa
chr5	31672343	31672905	213.41	17.28	16.06	intergenic	Gckr
chr5	32131387	32131637	82.6	23.47	17.33	intronic	Bre
chr5	32149672	32149922	79.63	20.92	9.92	intronic	Bre
chr5	32908176	32908560	156.23	24.9	28.48	intergenic	Yes1
chr5	33093271	33093702	137.22	28.39	24.52	intronic	Pisd
chr5	33164222	33164645	104.66	22.82	34.44	intronic	C330019G07Rik
chr5	33549089	33549339	284.71	56.22	33.21	intergenic	Spon2
chr5	35306324	35306574	115.06	28.06	19.54	intronic	Rgs12
chr5	35306724	35307174	221.57	57.52	27.63	intronic	Rgs12
chr5	35319275	35319525	93.27	18.15	11.37	intronic	Rgs12
chr5	37374416	37374666	119.26	35.16	19.94	intronic	Wfs1
chr5	38025354	38025792	151.52	25.89	23.5	intronic	Stk32b
chr5	38032099	38032349	122.79	29.24	13.21	intronic	Stk32b
chr5	38091067	38091317	130.91	30.54	37.93	intronic	Stk32b
chr5	44180674	44181112	109.8	29.21	15.43	intergenic	Fbxl5
chr5	44242294	44242544	77.85	17.51	19.02	intergenic	Bst1
chr5	44888357	44888607	87.87	23.38	23.68	intronic	Ldb2
chr5	45037200	45037450	82.14	25.35	17.31	intronic	Ldb2
chr5	46998959	46999209	95.07	24.27	18.21	intergenic	Lcorl
chr5	46999478	46999728	59.63	10.58	11.53	intergenic	Lcorl
chr5	47100830	47101280	161.86	21.27	20.82	intergenic	Lcorl
chr5	50436430	50436865	145.76	39.33	24.3	intronic	Gpr125
chr5	51079682	51079932	69.15	13.4	10.4	intergenic	AK030154
chr5	51211125	51211569	172.73	31.79	24.09	intergenic	AK030154
chr5	51212109	51212359	85.45	15.18	9.83	intergenic	AK030154
chr5	51491087	51491537	189.74	45.3	17.93	intergenic	Ppargc1a
chr5	52216013	52216401	119.48	30.08	31.63	intergenic	Ppargc1a
chr5	53201987	53202617	457.18	77.15	76.98	intronic	Zcchc4
chr5	53204418	53205060	722.52	66.41	55.23	intronic	Zcchc4
chr5	54290037	54290287	98.18	21.79	20.83	intronic	Tbc1d19
chr5	54471433	54471683	99.65	25.01	22.25	intronic	Stim2
chr5	64006584	64006834	251.47	19.63	22.36	intergenic	BC079612
chr5	64505332	64505872	451.07	52.92	53.08	intronic	Pgm1
chr5	65380262	65380512	77.62	14.27	10.28	intronic	Fam114a1
chr5	66719927	66720177	86.66	22.45	13.01	intronic	Apbb2
chr5	67725277	67725527	77.73	17.54	18.14	intronic	Slc30a9
chr5	68319497	68319747	69.45	15.63	7.06	intergenic	AK015200
chr5	68969708	68970145	141.57	13.85	23.9	intergenic	Grxcr1
chr5	72611005	72611255	91.73	22.05	25.49	intronic	Atp10d
chr5	72994883	72995133	72.29	17.8	14.72	exonic	Cnga1
chr5	73643901	73644151	86.07	24	14.58	intronic	Fryl
chr5	73726061	73726311	89.99	12.58	21.03	intronic	Ociad2
chr5	74403575	74404017	166.48	51.31	35.04	intronic	Usp46
chr5	74414867	74415314	205.33	55.91	48.11	intronic	Usp46
chr5	74675890	74676325	255.78	57.66	73.27	intronic	Scfd2
chr5	74737078	74737328	81.52	21.16	16.96	intronic	Scfd2
chr5	77427942	77428387	234.85	42.42	27.05	exonic	Srp72
chr5	81865453	81865903	184.7	20.47	16.66	intronic	Lphn3
chr5	82369617	82370026	137.81	33.96	28.78	intergenic	AK046304
chr5	87292457	87292899	198.07	45.02	32.35	intergenic	Ugt2b34
chr5	87459513	87459950	166.19	20.35	11.65	intergenic	Ugt2b35
chr5	89237897	89238147	49.71	8.33	7.72	intronic	AK042933
chr5	89414693	89415128	123.38	36.39	21.64	intronic	Slc4a4
chr5	89810802	89811052	97.59	20.4	14.59	intergenic	Gc
chr5	90459771	90460219	174.11	46.84	34.32	intergenic	Adamts3
chr5	90478914	90479164	75.92	16.03	25.86	intergenic	Cox18
chr5	91686865	91687315	115.26	15.85	19.83	exonic	AK050091
chr5	92047635	92047885	152.51	47.07	21.36	intronic	Parm1
chr5	92574320	92574770	282.42	52.98	45.53	intronic	Uso1
chr5	92576684	92577070	88.69	22.3	14.3	intronic	Uso1
chr5	93000935	93001185	89.8	26.89	19.48	intronic	Fam47e
chr5	93088400	93088650	147.43	41.86	25.71	intronic	Ccdc158
chr5	93423374	93423786	183.37	48.26	26.5	intergenic	Shroom3
chr5	93656100	93656546	293.58	25.75	23.06	intergenic	Ccni
chr5	95175547	95175797	74.16	18.56	22.14	intergenic	Gm6205
chr5	95505635	95505885	106.78	25.16	29.12	intergenic	C87414
chr5	95823225	95823475	98.83	20.02	24.12	intronic	Gm3286
chr5	96733102	96733552	471.66	39.38	40.14	intergenic	Mrpl1
chr5	96734902	96735152	69.87	16.08	19.61	intergenic	Mrpl1
chr5	96873359	96873778	144.61	22.54	26.6	intronic	Fras1
chr5	96899671	96899921	78.15	27.28	11.27	intronic	Fras1
chr5	96974951	96975354	174.98	21.92	21.65	intronic	Fras1
chr5	97168478	97168728	176.43	46.68	21.76	intronic	Fras1
chr5	98811081	98811331	49.29	4.96	4.64	intronic	1700007G11Rik
chr5	98811447	98811697	168.02	24.39	16.91	intronic	1700007G11Rik
chr5	99403112	99403654	198.39	28.76	25.65	intronic	Prkg2
chr5	99706851	99707501	331.03	60.86	44.82	intergenic	A930011G23Rik
chr5	99723648	99723898	114.54	38.91	18.81	intergenic	A930011G23Rik
chr5	99986530	99986780	64.51	18.52	11.33	exonic	A930011G23Rik
chr5	99987294	99987544	98.11	28.68	16.05	exonic	A930011G23Rik
chr5	100099135	100099385	137.78	36.87	28.86	intronic	A930011G23Rik
chr5	100620456	100620869	261.19	76.8	43.63	intergenic	Tmem150c
chr5	103806622	103806872	95.57	28.09	19.94	intergenic	DQ556350
chr5	103946643	103947065	237	48.07	45.25	intronic	Ptpn13
chr5	103948119	103948369	98.7	22.41	33.43	intronic	Ptpn13
chr5	106284637	106285016	121.77	26.59	18.15	intergenic	Zfp326
chr5	106342862	106343261	139.68	40.89	43.39	intronic	Zfp326
chr5	108251501	108251751	190.43	48.37	33.47	intronic	Evi5
chr5	108640486	108640736	88.26	13.42	14.74	intronic	Ccdc18
chr5	111215658	111215908	186.48	30.9	20.82	intronic	Ulk1
chr5	111553990	111554240	70.52	12.4	22.71	intronic	Ttc28
chr5	111606002	111606252	116.34	25.51	24.86	intronic	Ttc28
chr5	111792711	111792961	125.51	25.3	25.4	intronic	Pitpnb
chr5	112359026	112359475	205.55	27.83	27.84	intergenic	AK087393
chr5	113019453	113019900	443.83	48.25	37.76	promoter	AK006593
chr5	116334377	116334821	295.92	61.51	63.9	intronic	Cit
chr5	119054005	119054255	104.14	21.59	16.48	intronic	Med13l
chr5	119742196	119742832	280.06	53.88	53.23	intergenic	AK162140
chr5	120612713	120613163	262.98	58.11	30.57	intronic	Rbm19
chr5	120622611	120623061	506.94	75.05	52.41	intronic	Rbm19
chr5	123210706	123210956	97.62	17.86	18.02	intronic	Camkk2
chr5	123213275	123213525	74.48	12.79	12.43	intronic	Camkk2
chr5	123308884	123309134	65.36	12.94	10.79	intronic	Rnf34
chr5	129620493	129621141	443.26	60.56	57.22	exonic	Gpr133
chr5	130753149	130753551	135.09	40.49	19.95	intronic	Tyw1
chr5	131962117	131962733	591.39	133.54	65.76	intronic	Auts2
chr5	132068913	132069497	341.82	47.58	29.44	intronic	Auts2
chr5	132147600	132147975	158.59	32.37	29.61	intronic	Auts2
chr5	132258491	132258741	279.55	70.5	37.63	intronic	Auts2
chr5	132302707	132302957	129.04	33.61	25.56	intronic	Auts2
chr5	132388876	132389293	127.24	26.13	28.79	intronic	Auts2
chr5	132454979	132455229	77.46	21.9	17.73	intronic	Auts2
chr5	132498578	132498828	88.76	21.84	16.4	intronic	Auts2
chr5	132761833	132762083	70	21.71	12.8	intronic	Auts2
chr5	132792790	132793040	124.72	40.31	19.25	intronic	Auts2
chr5	132880867	132881117	94.45	25.31	17.11	intronic	Auts2
chr5	132942139	132942587	193.97	33.9	33.52	intronic	Auts2
chr5	134299644	134299894	92.29	19.25	14.43	intergenic	AK076755
chr5	135835570	135835980	235.31	67.31	44.7	intronic	Trim50
chr5	139376951	139377365	294.75	32.62	44.99	intergenic	Pdgfa
chr5	141293215	141293643	170.41	47.81	27.79	intronic	Gna12
chr5	144350124	144350374	182.64	48.55	35.05	intergenic	2810453I06Rik
chr5	144685773	144686185	130.94	28.21	25.56	exonic	Pms2
chr5	144866090	144866340	88	22.63	13.19	intronic	Lmtk2
chr5	146191849	146192298	234.67	40.12	27.12	intergenic	Cyp3a16
chr5	148286749	148286999	111.63	18.16	12.48	intronic	Pan3
chr5	149554392	149554642	63.69	16.89	10.34	exonic	2210417A02Rik
chr5	150387720	150388170	165.44	38.97	29.11	intronic	Wdr95
chr5	150839439	150839877	144.09	26.23	22.67	intronic	Rxfp2
chr5	151239203	151239453	115.78	24.95	26.96	exonic	Fry
chr5	151563939	151564189	73.31	15.66	24.52	intronic	Pds5b
chr5	151696313	151696563	117.29	39.19	20.51	intergenic	Kl
chr5	151697073	151697323	142.23	43.7	19.96	intergenic	Kl
chr5	151880529	151880938	202.86	28.35	28.56	intronic	Stard13
chr6	3056578	3056828	76.94	24.28	16.02	intergenic	Gm8579
chr6	5399910	5400323	167.37	29.49	22.66	intergenic	Asb4
chr6	5485701	5485951	102.92	16.95	15.46	intergenic	Pdk4
chr6	5546416	5546666	91.24	21.14	18.42	intergenic	Pdk4
chr6	5548043	5548448	148.45	33.94	19.14	intergenic	Pdk4
chr6	5712892	5713342	378.39	58.68	56.47	intronic	Dync1i1
chr6	5976734	5977354	244.37	38.6	48.96	intronic	Dync1i1
chr6	7162234	7162484	68.5	11.77	20.06	intergenic	AK133014
chr6	8324257	8324707	248.16	20.07	17.05	intronic	Gig18
chr6	8434824	8435268	142.82	27.33	31.97	intronic	Glcci1
chr6	12043456	12043851	101.35	16.98	16.93	intergenic	Gm6578
chr6	17313634	17313884	183.03	45.64	31.32	intergenic	Cav1
chr6	17888788	17889038	84.69	18.08	25.72	intronic	St7l
chr6	18077233	18077483	75.86	10.52	16.33	intergenic	Asz1
chr6	18226851	18227101	73.93	10.71	15.29	intronic	Cftr
chr6	18359629	18359879	83.09	21.69	17.57	intronic	Cttnbp2
chr6	18382308	18382720	226.13	33.18	45.2	exonic	Cttnbp2
chr6	21756017	21756267	155.54	36.29	14.07	exonic	Tspan12
chr6	21756417	21756667	146.25	23.75	10.29	intronic	Tspan12
chr6	23342731	23342981	90.88	15.69	13.28	intronic	Cadps2
chr6	23999138	23999388	71.02	19.82	12.04	intergenic	Slc13a1
chr6	24097136	24097544	178.49	50.15	41.61	intronic	Slc13a1
chr6	24162789	24163039	136.99	23.16	20	intergenic	Slc13a1
chr6	24289602	24289852	62.9	13.7	10.51	intergenic	AB351165
chr6	28567489	28567739	83.94	24.43	14.95	intronic	Snd1
chr6	29572673	29572923	74.35	15.48	21.95	intergenic	Tnpo3
chr6	31142229	31142679	126.13	36.77	32.9	intronic	BC145649
chr6	31419492	31419742	148.38	45.73	19.87	exonic	Mkln1
chr6	32968868	32969118	178.35	45.08	42.05	intronic	Chchd3
chr6	32983864	32984114	78.12	20.03	19.57	intronic	Chchd3
chr6	34353539	34353989	159.18	30.66	27.37	intergenic	Akr1b10
chr6	34458352	34458759	100.87	25.06	24.13	intergenic	Bpgm
chr6	34834632	34834882	123.81	41.26	19.65	intronic	Wdr91
chr6	35283572	35284017	503.41	87.87	54.7	intronic	AK006894
chr6	37484500	37484750	59.73	15.43	11.77	intronic	Akr1d1
chr6	37778854	37779304	106.82	24.79	19.75	intergenic	Atp6v0c
chr6	37779654	37779904	107.18	30.61	22.64	intergenic	Atp6v0c
chr6	38410609	38411059	110.26	19.59	18.72	intronic	Ubn2
chr6	38874015	38874663	361.3	110.47	51.43	intronic	Tbxas1
chr6	38892809	38893220	97.36	27.85	17.32	intronic	Tbxas1
chr6	39929066	39929490	182.74	30.09	29.07	intergenic	Gm5567
chr6	39975314	39975564	116.38	35.82	20.45	intergenic	Gm5567
chr6	40903721	40904055	78.35	20.53	14.88	intronic	AF479018
chr6	41695233	41695483	90.06	16.4	9.52	intergenic	Olfr459
chr6	46811163	46811595	266.75	33.24	65.15	intronic	Cntnap2
chr6	46816451	46816701	60.71	10.53	13.47	intronic	Cntnap2
chr6	46816851	46817101	63.78	8.78	21.34	intronic	Cntnap2
chr6	46870001	46870251	86.43	14.33	19.54	intronic	Cntnap2
chr6	49293012	49293262	63.75	18.16	7.62	intergenic	Ccdc126
chr6	49293394	49293644	99.62	13.68	20.9	intergenic	Ccdc126
chr6	51186158	51186603	433.53	104.52	76.49	intergenic	Mir148a
chr6	51207408	51207848	338.82	44.97	25.75	intergenic	Mir148a
chr6	51276203	51276851	322.61	68.58	73.83	intergenic	Mir148a
chr6	51528501	51528751	74.03	15.35	13.72	intronic	Snx10
chr6	51544842	51545092	135.52	39.44	18.68	intergenic	Snx10
chr6	51545242	51545492	64.8	17.47	15.9	intergenic	Snx10
chr6	51905913	51906485	306.8	59.8	57.04	intronic	Skap2
chr6	52276932	52277182	273.75	57.19	66.24	intergenic	Evx1
chr6	52314759	52315209	115.36	31.77	21.94	intergenic	Evx1
chr6	52358752	52359180	106.16	22.5	22.08	intergenic	Evx1
chr6	52557101	52557540	167.88	20.38	35.91	intronic	Hibadh
chr6	52887882	52888480	295.02	65.61	42.35	intronic	Jazf1
chr6	53854783	53855425	493.49	110.19	75.48	intronic	Cpvl
chr6	53855959	53856209	92.78	18.08	18	intronic	Cpvl
chr6	54149429	54149842	179.5	46.86	35.41	intronic	Chn2
chr6	54679431	54679881	344.71	69.15	48.89	intergenic	2410066E13Rik
chr6	55098168	55098418	94.48	26.6	23.67	intergenic	Crhr2
chr6	55367377	55367627	71.34	17.76	11.63	intergenic	Ghrhr
chr6	56794609	56794859	67.12	15.33	8.37	intronic	Fkbp9
chr6	61026441	61026691	130.7	34.54	16.68	intergenic	Mmrn1
chr6	65061332	65061582	74.84	18.37	21.92	intronic	Smarcad1
chr6	65091083	65091333	89.08	26.57	14.76	intronic	Hpgds
chr6	67176357	67176607	90.55	23.36	26.93	intergenic	Serbp1
chr6	67179299	67179743	171.56	25.2	29.86	intergenic	Serbp1
chr6	67194119	67194369	128.06	32.92	27.7	intergenic	Serbp1
chr6	70951452	70951702	82.73	17.55	15.5	intergenic	Foxi3
chr6	71122829	71123079	191.51	47.31	41.93	intergenic	Fabp1
chr6	71182524	71182941	148.87	25.01	28.45	intronic	Smyd1
chr6	72852526	72852976	210.38	23.63	27.88	intergenic	Kcmf1
chr6	83596747	83596997	355.5	68.52	55.5	exonic	Clec4f
chr6	83716925	83717175	112.81	26.97	16.89	intronic	Ankrd53
chr6	85999235	85999485	146.03	35.05	23.56	intronic	Add2
chr6	85999635	85999885	209.54	22.2	19.68	intronic	Add2
chr6	86075479	86075729	301.54	66.76	51.06	intergenic	Add2
chr6	86079958	86080208	309.68	74.49	45.21	intergenic	Add2
chr6	86881279	86881529	66.76	21.86	8.09	intronic	Aak1
chr6	86889591	86890211	307.54	54.7	62.7	intronic	Aak1
chr6	86954102	86954520	141.22	34.63	27.03	intergenic	Aak1
chr6	87765689	87765939	70.46	17.95	13.02	intergenic	Isy1
chr6	88896447	88896697	66.27	16.54	17	intergenic	Tpra1
chr6	89277226	89277476	117.65	40.54	17.55	intronic	Plxna1
chr6	94250549	94250799	103.78	28.12	27.63	intergenic	Magi1
chr6	94290569	94290994	293.45	55.61	42.58	intergenic	Magi1
chr6	99176620	99177032	178.33	48.25	36.93	intronic	Foxp1
chr6	100054853	100055103	141.08	35.83	28.21	intergenic	Rybp
chr6	100574136	100574386	170.77	29.14	35.65	intronic	Shq1
chr6	100983345	100983789	186.08	30.3	49.76	intergenic	Pdzrn3
chr6	100984315	100984565	78.44	11.63	24.77	intergenic	Pdzrn3
chr6	101016966	101017382	130.57	31.47	22.99	intergenic	Pdzrn3
chr6	101078096	101078541	197.04	43.74	59.06	intergenic	Pdzrn3
chr6	108316641	108316891	114.18	28.48	21.44	intronic	Itpr1
chr6	112227187	112227437	75.47	17.44	20.67	intronic	Lmcd1
chr6	113519161	113519411	110.81	24.78	21.69	intronic	Fancd2
chr6	115364395	115364645	67.29	17.69	16.85	intronic	Pparg
chr6	118948495	118948745	239.86	62.36	31.92	intronic	Cacna1c
chr6	119089699	119089949	195.44	57.53	29.62	intronic	Cacna1c
chr6	119417238	119417688	286.19	68.39	44.67	intronic	Wnt5b
chr6	119949911	119950276	85.45	11.91	7.17	intronic	Wnk1
chr6	121008845	121009273	116.08	27.96	19.48	intronic	Mical3
chr6	122283039	122283561	171.97	24.71	24.31	exonic	Phc1
chr6	122559723	122560137	194.49	42.4	33.74	promoter	Gdf3
chr6	122673625	122673875	70.79	14.91	12.69	intergenic	Slc2a3
chr6	124356456	124356706	77.43	20.7	16.18	intronic	Pex5
chr6	125054399	125054649	165.1	32.91	14.42	intronic	Chd4
chr6	126578494	126578744	202.52	37.09	25.31	intergenic	Kcna1
chr6	126637267	126637517	232.4	65.55	32.52	intergenic	Kcna6
chr6	127205811	127206061	143.54	21.05	8.46	intergenic	AK043994
chr6	127499421	127499777	91.11	15.55	15.05	intergenic	Efcab4b
chr6	128228149	128228399	100.5	20.56	31.35	intronic	Tead4
chr6	128977621	128977871	82.99	16.59	16.43	intergenic	Klrb1f
chr6	129197235	129197485	64.96	12.56	8.2	intergenic	AK036632
chr6	134295618	134296206	206.97	40.41	27.77	intronic	AK016696
chr6	134822207	134822457	80.48	23.71	13.96	intronic	Gpr19
chr6	136367103	136367353	70.49	10.59	14.43	intergenic	LOC100502936
chr6	137581878	137582128	134.31	41.06	26.98	intronic	Eps8
chr6	138163875	138164260	85.55	20.22	22.48	intergenic	Mgst1
chr6	138310648	138311062	212.01	19.3	17.73	intergenic	Lmo3
chr6	138369340	138369590	111.43	29.15	32.17	intronic	Lmo3
chr6	140105913	140106163	71.8	20.53	12.1	intergenic	Capza3
chr6	140197697	140197947	54.19	8.46	12.9	intergenic	Plekha5
chr6	140762572	140762961	151.88	21.17	21.18	intergenic	Aebp2
chr6	140789851	140790487	269.92	48.93	58.03	intergenic	AK081271
chr6	140791935	140792185	89.58	17.28	15.15	intergenic	AK081271
chr6	140834329	140834579	201.1	34.41	51.22	intergenic	AK081271
chr6	140886470	140886898	165.99	31.7	35.7	intergenic	AK081271
chr6	140966828	140967274	175.02	26.11	24.4	intronic	AK081271
chr6	141141663	141142313	323.13	79.4	49.02	intergenic	Pde3a
chr6	141222432	141222682	138.66	33.65	32.24	intronic	Pde3a
chr6	142754898	142755148	92.29	16.54	18.2	promoter	Gm766
chr6	142756161	142756411	83.55	16.3	11.31	intergenic	Gm766
chr6	144843765	144844015	112.03	19.99	27.45	intergenic	Bcat1
chr6	144888983	144889961	808.5	90.5	80.74	intergenic	Bcat1
chr6	144892827	144893469	348.69	77.49	64.97	intergenic	Bcat1
chr6	144894591	144895037	381.1	64.76	95.61	intergenic	Bcat1
chr6	147401501	147401917	249.01	64.07	48.12	intergenic	Ccdc91
chr6	147968056	147968490	260.73	34.46	43.89	intergenic	Far2
chr6	148235779	148236029	104.88	26.7	22	intronic	Tmtc1
chr6	148852478	148852728	93.41	19.69	20.94	intergenic	Caprin2
chr7	4167542	4167792	134.21	39.95	18.36	intergenic	Lilra5
chr7	6334749	6335199	191.42	41.69	39.02	promoter	Zfp28
chr7	19145160	19145794	280.99	79.63	59.15	exonic	Psg27
chr7	26653858	26654108	150.51	49.11	21.74	intergenic	Cyp2b10
chr7	26704566	26704816	132.02	21.52	7.6	intronic	Cyp2b10
chr7	26808857	26809107	150.51	20.4	24.87	intergenic	Cyp2b13
chr7	26928537	26928787	132.38	21.34	20.16	intergenic	Cyp2b9
chr7	27586116	27586544	175.74	30.69	25.69	intergenic	Cyp2g1
chr7	30434622	30434872	122.92	28.19	27.73	intergenic	Catsperg2
chr7	31496322	31496572	119.48	28.65	18.09	promoter	Atp4a
chr7	31770240	31770854	352.75	71.36	40.9	intronic	Fam187b
chr7	31797875	31798125	71.25	20.37	13.66	intergenic	Fxyd5
chr7	31840879	31841129	107.57	35.45	18.07	promoter	Fxyd1
chr7	34853198	34853596	150.44	23.04	30.47	intergenic	Gm12776
chr7	38972206	38972644	113.07	29.16	18.83	intronic	1600014C10Rik
chr7	47100056	47100306	88.59	12.36	6.69	intergenic	AK019774
chr7	47433129	47433379	84.17	15.03	12.48	intergenic	AK016650
chr7	53196033	53196483	522.53	112.09	70.06	intronic	Ccdc114
chr7	53757156	53757552	107.25	28.42	23.16	intronic	Sergef
chr7	56067312	56067762	104.27	19.74	15.27	intronic	Zdhhc13
chr7	56100714	56100964	118.18	33.61	23.61	promoter	Csrp3
chr7	56432213	56432646	298.86	82.69	61.31	intronic	Nav2
chr7	63300438	63300782	73.77	16.26	9.3	intergenic	Herc2
chr7	63307312	63307760	123.81	28.54	30.13	intronic	Herc2
chr7	63321492	63321909	146.28	27.57	19.31	intronic	Herc2
chr7	72583067	72583717	428.55	51.38	43	intergenic	Tjp1
chr7	72976339	72976745	149.52	19.28	33.42	intergenic	AK007376
chr7	73057413	73057863	203.5	52.69	41	intronic	Pcsk6
[truncated: 353 more rows]

## Sheet: ileum-specific
Table S5: Differential DHS along the length of the intestine; ileum-specific
chrom	start	stop	duodenum_value	ileum_value	colon_value	feature	nearest_gene
chr1	4526963	4527213	40.58	103.27	16.76	intergenic	Sox17
chr1	4635954	4636204	28.7	123.06	19.58	intergenic	Mrpl15
chr1	9096024	9096274	10.28	51.74	13.33	intronic	Sntg1
chr1	13688228	13688650	186.24	451.88	92.18	intronic	Xkr9
chr1	20936135	20936385	29.72	105.07	32.65	intergenic	Efhc1
chr1	21058510	21059360	115.06	555.41	76.72	intronic	Tram2
chr1	36134196	36134646	87.22	434.81	102.18	intronic	Hs6st1
chr1	36390002	36390452	88.89	501.27	64.79	intergenic	4632411B12Rik
chr1	36845070	36845505	64.17	292.53	80.46	intergenic	Tmem131
chr1	36993520	36993907	39.76	191.51	43.26	intronic	Tmem131
chr1	37022412	37023256	280.06	856.69	233.59	intergenic	Tmem131
chr1	37070514	37070937	35.24	230.12	55.55	intergenic	Vwa3b
chr1	39038420	39038828	50.83	159.35	27.8	intergenic	Pdcl3
chr1	39275033	39275283	35.87	117.37	31.26	intronic	Npas2
chr1	39524096	39524546	120.14	670.61	106.75	intronic	Tbc1d8
chr1	40842644	40843079	122.26	374.56	67.02	exonic	Mfsd9
chr1	42916052	42916302	28.57	85.2	13.26	intronic	Mrps9
chr1	52308450	52308700	73.7	221.4	61.05	intergenic	Gls
chr1	53462732	53462982	17.28	68.22	16.51	intergenic	Asnsd1
chr1	53741707	53741957	10.96	58.2	10.83	intergenic	Mir1937b-2
chr1	53784444	53784694	11.88	61.95	11.71	intergenic	AK038423
chr1	53871208	53871658	71.11	193.98	41.97	intronic	Hecw2
chr1	53872117	53872673	69.81	191.99	30.41	intronic	Hecw2
chr1	53939719	53940155	45.45	191.5	22.21	intronic	Hecw2
chr1	54320669	54321119	58.48	223.29	33.6	exonic	Ccdc150
chr1	55820830	55821268	94.61	382.5	54.95	intergenic	Plcl1
chr1	56892519	56892960	37.18	323.16	45.4	intronic	Satb2
chr1	56893092	56893342	19.57	151.54	52.76	intronic	Satb2
chr1	59247370	59247620	62.24	136.67	27.73	intronic	Als2
chr1	59573344	59573785	244.09	714.08	189.44	exonic	Gm973
chr1	59827272	59827522	14.79	64.14	18.53	intronic	Bmpr2
chr1	60629909	60630159	22.22	99.35	19.32	intergenic	Raph1
chr1	60979949	60980199	19.37	53.09	5.9	intergenic	Ctla4
chr1	61743659	61744040	30.93	145.99	39.76	intronic	Pard3b
chr1	64339946	64340196	11.85	54.94	13.31	intergenic	Klf7
chr1	64680763	64681208	32.82	227.47	37.65	intergenic	Fam119a
chr1	66866689	66867121	40.05	174.04	26.41	intergenic	1110028C15Rik
chr1	69462853	69463387	23.14	124.53	17.55	intergenic	Ikzf2
chr1	71507464	71507714	18.43	97.57	29.64	intergenic	Abca12
chr1	71567171	71567421	38.29	125.58	26.32	intergenic	Atic
chr1	71567901	71568317	37.14	152.35	37.01	intergenic	Atic
chr1	73346501	73346751	34.07	127.55	26.09	intergenic	Pinc
chr1	74375070	74375495	39.93	217.81	23.09	intronic	Pnkd
chr1	75145284	75145854	20.62	122.62	16.5	intergenic	Fam134a
chr1	75197646	75197896	81.69	266.98	48.01	promoter	Glb1l
chr1	75228406	75229022	123.93	454.46	75.96	intergenic	Dnajb2
chr1	77265420	77265854	45.13	156.32	33.49	intergenic	Epha4
chr1	78321149	78321586	65.88	224.76	72.13	intronic	Sgpp2
chr1	82760454	82760704	40.29	155.98	48.58	intronic	Tm4sf20
chr1	83804161	83804411	14.01	58.14	12.05	intergenic	AK017086
chr1	83804557	83804807	10.38	47.91	5.18	intergenic	AK017086
chr1	83903619	83903869	41.07	104.17	22.33	intronic	AK017086
chr1	88334049	88334299	63.59	146.2	30.88	intergenic	1700019O17Rik
chr1	90315484	90315920	186.44	492.96	87.55	intronic	Spp2
chr1	90985288	90985938	210.14	825	209.09	intronic	Sh3bp4
chr1	91472183	91472633	53.05	190.1	49.67	intronic	Agap1
chr1	92119561	92119980	105.78	251.38	62.06	intergenic	Cxcr7
chr1	93338644	93339087	16.53	153.77	27.02	intronic	Per2
chr1	93340985	93341235	24.58	130.66	34.73	exonic	Per2
chr1	94833025	94833475	32.27	142.74	25.7	intronic	Capn10
chr1	95062028	95062460	41.33	158.1	33.87	intergenic	2310007B03Rik
chr1	95064621	95064871	137.39	346.08	62.88	intergenic	2310007B03Rik
chr1	95481082	95481332	27.39	95.8	21.14	intronic	Farp2
chr1	95812156	95812406	27.98	102.09	17.92	intronic	D2hgdh
chr1	95881176	95881594	62.87	160.94	40.94	intergenic	Gm6086
chr1	99968324	99968574	38.52	114.35	26.43	intronic	Pam
chr1	106894408	106894808	29.59	153.05	28	intergenic	Cdh20
chr1	106928868	106929118	49.25	125.45	28.96	intergenic	Cdh20
chr1	107256709	107257150	39.34	363.95	58.38	intronic	AK039635
chr1	108017391	108017641	19.01	115.86	27.26	intergenic	Phlpp1
chr1	108349182	108349814	61.72	319.76	64.21	intergenic	Phlpp1
chr1	108439119	108439369	103.94	264.24	47.96	intronic	AK085305
chr1	115392516	115392766	43.76	116.95	25.33	intergenic	Dsel
chr1	121361152	121361402	97.43	202.51	39.91	intergenic	Ralb
chr1	121414547	121414993	71.44	261.19	43.61	intergenic	AK053246
chr1	122146417	122146667	46.86	161.86	33.4	intronic	Steap3
chr1	123207627	123207877	61.99	290.75	75.47	intronic	Insig2
chr1	123501756	123502177	79.69	439.1	86.34	intergenic	Ddx18
chr1	123525452	123525702	16.92	99.6	25.77	intergenic	Ddx18
chr1	123530990	123531438	36.2	206.07	29.41	intergenic	Ddx18
chr1	123542119	123542739	55.8	333.42	61.05	intergenic	Ddx18
chr1	123544584	123545019	37.54	232.14	30.26	intergenic	Ddx18
chr1	123592134	123592384	19.86	124.91	28	intergenic	Ddx18
chr1	123594524	123594974	25.59	315.46	26.94	intergenic	Ddx18
chr1	123596243	123596885	37.67	344.51	60.8	intergenic	Ddx18
chr1	123604576	123605226	50.24	680.72	63.92	intergenic	Ddx18
chr1	123656808	123657058	12.99	65.08	16.83	intergenic	Ddx18
chr1	123706468	123706907	21.7	77.8	17.93	intergenic	Ddx18
chr1	127357091	127357341	22.55	64.49	13.6	intergenic	Actr3
chr1	128505875	128506125	64.6	170.18	40.28	intronic	Nckap5
chr1	128628455	128628905	73.21	232.45	53	intronic	Nckap5
chr1	128739099	128739549	35.18	255.32	64.48	intergenic	Nckap5
chr1	129113493	129114141	144.81	517.65	123.3	intronic	Mgat5
chr1	129861143	129861592	75.86	267.52	46.02	intronic	Zranb3
chr1	132537513	132537763	31.12	82.74	15.05	intronic	C4bp
chr1	132960814	132961064	83.94	293.9	69.46	intronic	Mapkapk2
chr1	133190681	133190931	32.27	146.22	29.53	intronic	Srgap2
chr1	134028247	134028497	17.8	79.69	24.36	intronic	Cdk18
chr1	134218929	134219179	14.99	80.76	27.38	intronic	Nuak2
chr1	134934183	134934603	27.39	80.14	18.97	intergenic	Mdm4
chr1	135173504	135173954	77.59	473.68	178.12	intronic	Plekha6
chr1	135190366	135190816	80.15	276.52	52.56	exonic	Plekha6
chr1	135322532	135322782	62.93	189.95	53.58	promoter	Sox13
chr1	135784344	135784594	53.08	304.83	86.26	intergenic	Optc
chr1	135961060	135961680	39.3	146.2	31.3	intergenic	Btg2
chr1	135998111	135998561	85.47	341.96	68.41	intergenic	Chit1
chr1	136059132	136059576	107.11	308.86	78.76	intergenic	Chit1
chr1	136059923	136060563	107.44	534.7	87.33	intergenic	Chit1
chr1	136122513	136122963	30.76	248.15	24.51	intronic	Adora1
chr1	136214023	136214273	26.67	128.49	33.5	exonic	Ppfia4
chr1	136341657	136341907	26.18	92.61	14.04	intergenic	Klhl12
chr1	137191671	137192221	74.12	177.48	34.68	intergenic	Timm17a
chr1	137802806	137803207	34.98	159.51	16.86	intronic	Pkp1
chr1	138021144	138021394	49.09	112.94	17.95	intergenic	BC115961
chr1	138023586	138023836	70	169.37	38.75	exonic	BC115961
chr1	138120438	138120888	127.4	442.47	148.66	exonic	5730559C18Rik
chr1	138125488	138125738	101.38	246.75	56.98	promoter	5730559C18Rik
chr1	139111719	139112118	37.41	111.93	32.03	intergenic	Nr5a2
chr1	153142699	153143114	52.14	227.3	52.83	intergenic	Ivns1abp
chr1	153597248	153597698	39.04	119.75	26.7	intergenic	Edem3
chr1	155626912	155627162	37.01	141.23	39.52	intronic	Rgsl1
chr1	155636119	155636554	57.14	282.24	78.65	intronic	Rgsl1
chr1	155876247	155876497	19.6	79.6	18.13	intergenic	AK154552
chr1	156904025	156904475	121.74	431.54	90.9	intergenic	AK029591
chr1	156904825	156905275	190.11	453.89	84.36	intergenic	AK029591
chr1	156935639	156935889	11.32	47.16	8.47	intergenic	AK029591
chr1	162615737	162615987	22.42	93.56	27.69	intronic	Rabgap1l
chr1	166348582	166348832	26.93	62.1	10.3	intronic	Nme7
chr1	166390862	166391112	42.58	178.76	56.67	intergenic	Atp1b1
chr1	167552436	167552686	20.91	85.62	26.45	intronic	Mpzl1
chr1	172274037	172274287	13.12	73.62	15.07	intronic	Nos1ap
chr1	172446405	172446855	80.15	251.23	60.73	intronic	Nos1ap
chr1	172496468	172497116	142.65	705.91	101.91	intronic	Nos1ap
chr1	172683680	172684130	119.97	353.03	58.18	intronic	Atf6
chr1	172795134	172795384	18.36	52.73	10.29	intronic	Atf6
chr1	172823369	172824011	67.02	272.09	33.54	intergenic	Dusp12
chr1	172824654	172824904	12.76	50.89	6.93	intergenic	Dusp12
chr1	172828655	172829070	37.21	200.31	43.09	intergenic	Fcrlb
chr1	172829150	172829400	12.54	48.1	9.54	intergenic	Fcrlb
chr1	172905769	172906019	45.06	102.99	20.26	intronic	Fcgr2b
chr1	174449260	174449510	23.63	62.43	9.81	promoter	Ccdc19
chr1	176547865	176548257	21.7	112.55	17.66	intronic	Fmn2
chr1	178934159	178934590	73.17	253.09	46.72	intronic	Sdccag8
chr1	178956119	178956369	27.3	157.22	41.79	intronic	Akt3
chr1	178958829	178959646	88.53	560.31	85.51	intronic	Akt3
chr1	179542349	179542993	51.55	352.21	38.38	intergenic	AK009784
chr1	179609717	179610123	32.37	149.98	36.79	intergenic	AK009784
chr1	180624776	180625026	32.37	133.69	24.33	intronic	Kif26b
chr1	180633587	180634027	47.91	180.23	32.19	intronic	Kif26b
chr1	182138112	182138362	12.4	77.53	3	intergenic	Adck3
chr1	182157658	182157908	31.25	114.96	24.76	exonic	Psen2
chr1	182653996	182654446	33.58	204.31	35.5	promoter	Acbd3
chr1	182710878	182711328	29.09	152.37	36.38	intergenic	H3f3a
chr1	184180772	184181222	111.56	360.44	85.82	intergenic	Degs1
chr1	184386973	184387223	19.7	90.01	20.24	intronic	Trp53bp2
chr1	185477582	185477993	20.52	97.86	22.5	intergenic	1700056E22Rik
chr1	185881172	185881422	63.03	136.49	26.29	intronic	Dusp10
chr1	186182021	186182271	41.53	184.03	48.84	intergenic	Dusp10
chr1	186183363	186183806	25.69	112.15	34.29	intergenic	Dusp10
chr1	186684123	186684373	55.8	147.48	35.86	intergenic	C130074G19Rik
chr1	187087770	187088020	18.1	79.72	10.72	intronic	Rab3gap2
chr1	187322342	187322592	31.61	91.06	18.25	intergenic	5033404E19Rik
chr1	187599068	187599318	30.11	123.76	25.41	intergenic	5033404E19Rik
chr1	189876737	189876987	28.99	158.08	46.54	intronic	Esrrg
chr1	191971782	191972032	30.6	134.14	45.77	intronic	Prox1
chr1	192178498	192178748	27.91	134.66	36.88	intergenic	BC030469
chr1	193013721	193014295	55.96	223.13	61.33	intronic	Atf3
chr1	193661631	193661881	89.18	253.71	54.75	intergenic	Nek2
chr1	193748364	193748787	94.45	238.56	41.11	intergenic	Slc30a1
chr1	194993216	194993647	18.88	86.61	21.39	promoter	A130010J15Rik
chr1	195665375	195665625	13.62	70.83	12.31	intergenic	AK014513
chr1	195666318	195666568	14.6	101.19	18.04	intergenic	AK014513
chr1	195778483	195779105	36.98	374.92	77.99	intergenic	AK014513
chr1	195791211	195791861	46.8	349.09	68.94	intergenic	AK014513
chr1	195846673	195846923	20.16	96.78	12.84	intergenic	AK014513
chr1	195864973	195865223	37.02	166.49	28.64	intergenic	AK014513
chr1	196490250	196490826	65.97	197.04	28.29	intronic	Plxna2
chr1	196511923	196512173	17.15	65.29	16.81	intronic	Plxna2
chr10	5612204	5612454	43.36	203.94	32.25	intronic	Esr1
chr10	8623391	8623841	37.08	108.06	15.82	intergenic	Sash1
chr10	12541266	12541516	91.73	355.93	113.2	intronic	Utrn
chr10	12599812	12600257	50.24	182.88	26.98	intergenic	Utrn
chr10	12619683	12619933	48.14	216.7	65.33	intergenic	AK045519
chr10	12759582	12760004	39.47	147.33	16.48	intergenic	Plagl1
chr10	12877306	12877556	20.65	102.97	29.92	intronic	Fam164b
chr10	13692636	13692886	44.96	97.36	15.14	intronic	Hivep2
chr10	17202649	17203079	58.58	209.45	36.22	intergenic	Cited2
chr10	17392413	17392663	88.56	229.14	42.91	intergenic	Cited2
chr10	17767452	17768044	92.16	318.73	42.8	intergenic	Reps1
chr10	18187016	18187408	36.95	131.22	24.37	intronic	Nhsl1
chr10	18707691	18708141	42.94	236.15	57.4	intergenic	Tnfaip3
chr10	18874780	18875030	30.76	70	10.67	intronic	AK044491
chr10	18877206	18877856	49.94	271.09	57.41	intronic	AK044491
chr10	18901593	18901843	13.52	78.23	28.03	intronic	AK044491
chr10	21181697	21182124	20.23	110.07	21.28	intergenic	AK006189
chr10	21314724	21314974	58.03	131.83	27.73	intronic	1700020N01Rik
chr10	24461130	24461380	61.07	189.01	29.92	intergenic	Enpp1
chr10	36897687	36897937	45.39	134.95	20.09	intergenic	AK040320
chr10	39899320	39899770	57.89	412.03	42.2	intergenic	Slc16a10
chr10	40157049	40157299	24.28	96.24	29.22	intronic	Cdk19
chr10	40239289	40239732	84.37	205.29	39.73	intergenic	Cdk19
chr10	40730814	40731264	54.95	231.18	38.8	intergenic	Gpr6
chr10	41193997	41194247	71.08	185.74	41.44	promoter	Mical1
chr10	41211582	41211832	24.25	94.16	23.47	promoter	Smpd2
chr10	41306651	41307101	89.05	334.49	62.8	intronic	Ccdc162
chr10	42450048	42450298	26.28	166.66	33.08	intergenic	AK035573
chr10	43710455	43710705	60.84	176.44	45.78	intronic	Aim1
chr10	43783476	43783910	66.18	308.77	58.21	intergenic	Aim1
chr10	44640865	44641281	49.06	229.31	78.48	intergenic	Prep
chr10	51376903	51377153	40.94	118.71	23.78	intergenic	Rfx6
chr10	57706955	57707205	15.78	92.15	28.06	intergenic	Gm4981
chr10	58738986	58739236	4.94	33.42	8.71	intergenic	P4ha1
chr10	59135142	59135392	29.16	107.37	21.56	intergenic	Cbara1
chr10	59347559	59348005	39.17	112	19.35	intronic	Dnajb12
chr10	59635523	59635971	161.8	561.88	171.8	intergenic	Chst3
chr10	60281797	60282447	199.57	794.14	121.7	intronic	Unc5b
chr10	60605678	60606107	57.07	150.28	34.53	intronic	Sgpl1
chr10	61665166	61665610	87.74	269.21	45.86	intronic	Tspan15
chr10	61988177	61988427	24.68	65.43	12.27	intergenic	2510003E04Rik
chr10	69378961	69379211	33.15	118.37	30.57	intronic	Ank3
chr10	69403800	69404225	43.07	183.57	22.32	intronic	Ank3
chr10	69568919	69569169	29.13	109.36	25.7	intronic	Ccdc6
chr10	70862250	70862695	189.5	610.76	135.02	intronic	Ipmk
chr10	74449757	74450007	21.5	85.75	23.58	intronic	Gnaz
chr10	74515653	74515903	31.81	95.56	22.94	exonic	Rab36
chr10	74619547	74620397	113.17	680.56	82.83	exonic	Bcr
chr10	75118046	75118496	246.91	707.47	125.56	intronic	Cabin1
chr10	75229566	75229966	59.1	193.86	20.63	intergenic	Cabin1
chr10	75549376	75549820	22.22	208.71	35.49	intronic	Slc5a4b
chr10	79200230	79200680	161.46	513.63	105.68	exonic	Polrmt
chr10	79278397	79278847	123.37	349.21	55.87	exonic	Palm
chr10	79412996	79413246	12.93	65.47	10.65	intronic	Arid3a
chr10	79609857	79610107	19.31	88.58	24.85	promoter	Midn
chr10	79610457	79610707	49.35	210.96	61.72	promoter	Midn
chr10	79618800	79619172	31.22	114.53	35.66	exonic	Midn
chr10	79623641	79623891	101.19	353.93	92.12	intergenic	Midn
chr10	79624441	79624691	10.67	46.25	11.44	intergenic	Midn
chr10	79626447	79626885	27.19	152.38	47.92	intergenic	Cirbp
chr10	79628548	79628998	35.08	105.99	13.63	promoter	Cirbp
chr10	79787174	79787424	33.9	91.21	19.93	promoter	Pcsk4
chr10	79794950	79795200	233.16	534.05	108.25	intronic	Reep6
chr10	79889493	79889743	36.59	91.83	17.63	intronic	Tcf3
chr10	80046643	80047293	82.27	289.3	58.41	exonic	Fam108a
chr10	80088971	80089421	146.81	357.29	77.1	intronic	Csnk1g2
chr10	80139846	80140296	87.35	254.23	61.94	promoter	Mknk2
chr10	80659266	80659716	52.39	352.99	90.24	intronic	2310050B05Rik
chr10	80719508	80719758	33.28	112.14	29.37	promoter	Matk
chr10	80822822	80823072	9.06	57.46	16.34	intronic	F630110N24Rik
chr10	80870347	80870797	96.05	322.77	92.74	exonic	Nfic
chr10	80889609	80889859	131.1	400.43	119.06	exonic	Nfic
chr10	82292454	82292826	30.07	85.69	19.38	intergenic	Txnrd1
chr10	82556331	82556778	54.16	436.91	94.69	intronic	Chst11
chr10	82582969	82583219	233	551.2	131.11	intronic	Chst11
chr10	82583581	82584031	162.58	478.59	136.09	intronic	Chst11
chr10	82607000	82607250	18.26	79.17	13.29	intronic	Chst11
chr10	84471941	84472353	31.12	145.97	24.27	intronic	Ric8b
chr10	85474504	85474954	51.51	205.48	39.34	promoter	Bpil2
chr10	85555942	85556780	184.08	583.76	128.82	promoter	AK019657
chr10	88315856	88316703	153.18	737.04	184.36	intergenic	Utp20
chr10	88392602	88393026	29.26	163.47	48.23	intergenic	Slc5a8
chr10	88399147	88399572	33.58	172.78	45.17	intergenic	Slc5a8
chr10	88415646	88415896	9.36	39.37	9.51	intronic	Ano4
chr10	88887710	88887960	80.41	193.15	37.13	intronic	Gas2l3
chr10	88904620	88905144	17.48	120.51	19.13	intronic	Gas2l3
chr10	88919502	88919883	25.43	86.98	13.97	intronic	Nr1h4
chr10	88932470	88932720	17.67	61.32	11.77	intronic	Nr1h4
chr10	88954178	88954428	34.82	121.84	34.7	intronic	Nr1h4
chr10	88955069	88955519	35.8	233.14	78.07	intronic	Nr1h4
chr10	92961848	92962498	37.87	354.86	79.41	intronic	Hal
chr10	93215833	93216083	42.21	293.4	75	intergenic	Ntn4
chr10	93224732	93224982	48.34	171.58	28.36	intergenic	Ntn4
chr10	93964646	93964896	44.77	154	37.41	intergenic	Tmcc3
chr10	94569479	94569918	55.21	280.28	32.16	intergenic	Cradd
chr10	95094478	95094728	54.68	186.93	39.12	intergenic	Nudt4
chr10	95863592	95863842	50.76	223.56	75.52	intergenic	Btg1
chr10	95867274	95867892	79.3	365.89	56.38	intergenic	Btg1
chr10	98331000	98331250	34.95	126.94	31.92	intergenic	Atp2b1
chr10	99362439	99362805	26.12	70.51	10.73	intergenic	Kitl
chr10	102153120	102153714	16.95	141.66	20.31	intergenic	Rassf9
chr10	106795604	106796014	89.37	235.82	39.26	intronic	Lin7a
chr10	107304681	107304931	11.55	62.01	13.82	intronic	Gm6924
chr10	110150641	110151057	51.18	200.53	28.1	intergenic	E2f7
chr10	115071364	115071614	17.74	63.72	10.82	intergenic	Lgr5
chr10	115638872	115639264	23.76	100.97	22.97	intronic	Ptprr
chr10	116312839	116313089	84.99	276.76	52.58	intronic	Gm239
chr10	116980075	116980486	62.54	254.5	66.45	intergenic	Cpm
chr10	116999378	116999826	78.22	269.39	77.55	intergenic	Cpm
chr10	117027343	117027593	44.35	177.87	44.12	intergenic	Cpm
chr10	120136991	120137241	44.84	279.9	57.08	intergenic	AK014882
chr10	120760560	120760967	78.41	178.21	35.65	intergenic	Tbc1d30
chr10	120823321	120823771	115.61	305.23	61.98	intronic	Gns
chr10	122493268	122493718	17.28	125.02	29.34	intronic	Mon2
chr10	126371628	126371878	92.94	327.8	87.88	intergenic	AK087024
chr10	126480229	126480678	38.75	177.4	31.45	exonic	Mettl1
chr10	126597125	126597522	35.83	145.89	22.02	intergenic	B4galnt1
chr10	127056000	127056450	63.07	319.97	78.02	intronic	Lrp1
chr10	127165238	127165688	128.87	427.03	78.75	exonic	Tac2
chr10	127170992	127171242	57.8	160.23	38.75	intergenic	Tac2
chr10	127819474	127819924	36.55	160.22	21.82	exonic	Ankrd52
chr10	127972292	127972542	21.34	91.18	26.73	intergenic	Zc3h10
chr10	128107854	128108104	16.3	92.22	20.57	exonic	Suox
chr11	3712351	3712601	45.92	134.6	26.58	intronic	Osbp2
chr11	3713351	3713601	104.63	383.82	117.05	intronic	Osbp2
chr11	3716025	3716389	20.75	67.77	8.84	intronic	Osbp2
chr11	3837257	3837685	40.78	154.2	24.74	intergenic	Tcn2
chr11	4016783	4017233	111.99	296.26	61.79	intronic	Sec14l2
chr11	6132215	6132465	66.96	185.2	29.78	promoter	Npc1l1
chr11	7658741	7659525	136.04	803.61	140.6	intergenic	Igfbp3
chr11	7685996	7686602	44.9	363.57	49.32	intergenic	Igfbp3
chr11	7694133	7694735	33.87	405.01	36.92	intergenic	Igfbp3
chr11	8364085	8364335	103.87	283.67	65.13	intronic	Tns3
chr11	8430505	8430955	62.34	235.53	43.21	exonic	Tns3
chr11	8444434	8444684	43.43	154.73	26.25	intronic	Tns3
chr11	8454238	8454680	59.63	358.48	100.79	intronic	Tns3
chr11	8497519	8498348	203.66	607	116.48	intronic	Tns3
chr11	9048340	9048590	35.54	157.86	32.47	intergenic	Upp1
chr11	12350923	12351173	15.94	62.54	12.4	intronic	Cobl
chr11	19828704	19828954	36.75	135.22	30.76	intronic	Spred2
chr11	20388770	20389220	121.08	295.22	53.92	intergenic	Gm12034
chr11	23752841	23753091	69.28	166.37	40.58	intergenic	Papolg
chr11	24217929	24218179	33.45	142.25	25.9	intergenic	AK148130
chr11	24416756	24417192	76.28	235.61	38.67	intronic	AK148130
chr11	24641012	24641262	75.96	193.21	23.16	intergenic	Gm10466
chr11	31950216	31950666	91.63	483.45	107.44	intronic	Nsg2
chr11	32237886	32238136	31.03	125.68	32.76	intergenic	Sh3pxd2b
chr11	35788655	35789083	87.02	236.05	60.16	intronic	Wwc1
chr11	43407823	43408073	23.86	82.56	15.76	intergenic	Fabp6
chr11	43413951	43414201	10.31	59.53	8.47	intronic	Fabp6
chr11	43414972	43415403	36.72	241.68	31.89	promoter	Fabp6
chr11	43417759	43418209	54.36	477.94	96.57	intergenic	Fabp6
chr11	43422356	43422806	33.78	314.33	27.42	intergenic	Fabp6
chr11	43435156	43435606	53.64	291.95	35.92	intergenic	Fabp6
chr11	44325866	44326116	79.29	212.58	46.89	intergenic	Rnf145
chr11	45680911	45681323	42.77	161.88	20.02	intronic	Clint1
chr11	49075832	49076282	101.58	375.53	119.64	exonic	Mgat1
chr11	50010927	50011377	72.26	370.8	95.11	exonic	3010026O09Rik
chr11	50031095	50031745	82.34	245.38	45.44	intergenic	Sqstm1
chr11	50159800	50160050	23.76	101.76	29.02	intergenic	Cby3
chr11	50167324	50167574	31.65	100.43	26.02	intergenic	Cby3
chr11	52934684	52935107	80.12	377.03	98.74	intronic	Fstl4
chr11	53372690	53373089	26.51	154.32	32.17	intergenic	AK038603
chr11	53698873	53699312	40.12	164.71	18.58	intronic	Slc22a5
chr11	53845070	53845520	19.57	127.03	24.99	intergenic	Slc22a4
chr11	54761932	54762182	35.02	201.25	15.62	intronic	Tnip1
chr11	57581143	57581593	40.58	128.23	27.18	intronic	Galnt10
chr11	57659130	57659380	50.43	121.3	19.4	intergenic	Hand1
chr11	58745560	58745810	27.65	139.64	21.03	exonic	Rnf187
chr11	60158966	60159410	64.63	202.08	45.35	intronic	Tom1l2
chr11	60531619	60531869	31.81	86.02	20.31	exonic	Flii
chr11	61216649	61216899	50.79	183.74	27.23	intergenic	Slc47a1
chr11	61488768	61489218	87.74	407.07	147.46	intronic	Slc5a10
chr11	61490568	61491018	43.07	156.55	32.67	intronic	Slc5a10
chr11	61492466	61492911	44.87	259.81	43.51	intronic	Slc5a10
chr11	61500316	61500766	122.36	384.28	87.54	intronic	Fam83g
chr11	61508334	61508584	60.28	175.32	34.72	intronic	Fam83g
chr11	62590637	62590887	31.94	123.85	32.58	intergenic	Zfp286
chr11	62933187	62933605	58.51	169.87	28.22	intergenic	Pmp22
chr11	66900338	66900588	37.83	145.96	31.11	intronic	Myh3
chr11	67324497	67324747	23.73	95.17	27.25	intergenic	Gas7
chr11	67376780	67377227	164.48	535.94	128.14	intronic	Gas7
chr11	67845993	67846443	272.86	581.33	127.97	intronic	Stx8
chr11	69220593	69221043	69.67	169.97	25.49	promoter	Kdm6b
chr11	69697316	69697966	84.86	466.59	87.08	exonic	Acap1
chr11	69698316	69698566	33.05	83.02	15.18	promoter	Acap1
chr11	69758692	69758942	23.63	93.8	24.07	exonic	Slc2a4
chr11	69769297	69769721	89.24	306.22	55.19	intergenic	Slc2a4
chr11	70036842	70037261	57.27	162.38	30.85	intergenic	Bcl6b
chr11	70286208	70286458	37.7	106.12	16.08	intergenic	Zmynd15
chr11	70492941	70493346	25.79	88.43	20.84	exonic	Camta2
chr11	70559227	70559477	125.14	397.1	94.36	intergenic	AK039373
chr11	71403271	71403521	37.14	157.81	46.03	intergenic	Wscd1
chr11	71601790	71602040	102.37	355.2	88.43	intronic	Wscd1
chr11	72251960	72252210	53.21	208.32	56.61	intergenic	Ggt6
chr11	72772661	72772911	136.53	516.33	157.4	promoter	Atp2a3
chr11	74220180	74220430	52.33	167.16	44.37	intronic	Rap1gap2
chr11	74343157	74343407	15.22	47.19	7.08	intronic	Rap1gap2
chr11	74875425	74875675	53.22	234.64	70.17	intronic	Smg6
chr11	75346495	75346745	44.24	111.77	18.96	intronic	Slc43a2
chr11	75380623	75381073	125.5	384.85	89.07	intronic	Slc43a2
chr11	76283074	76283522	154.1	504.93	145.04	promoter	Abr
chr11	76409751	76410151	26.54	107.87	25.03	intergenic	Abr
chr11	76711593	76712407	90.46	437.59	112	intergenic	Tmigd1
chr11	76734636	76734886	18.23	68.1	17.17	intergenic	Tmigd1
chr11	76819529	76819779	100.34	219.58	42.54	intronic	Slc6a4
chr11	76825494	76825744	23.17	72.21	15.62	intronic	Slc6a4
chr11	77318813	77319263	231.63	636.22	146.32	exonic	Git1
chr11	77319613	77320463	354.86	1022.38	277.84	exonic	Git1
chr11	77650285	77650535	56.94	322.62	88.53	intronic	Myo18a
chr11	77985945	77986561	65.94	210.07	32.58	exonic	Nek8
chr11	78247117	78247367	19.37	77.55	17.23	intergenic	Slc13a2
chr11	78255096	78255746	41.83	315.33	49.53	intergenic	Slc13a2
chr11	78516666	78516916	40.61	117.6	23.66	intergenic	AK136065
chr11	78693529	78693779	118.57	311.84	71.78	intergenic	1810012P15Rik
chr11	78734617	78734867	69.28	214.21	44.22	intronic	Nos2
chr11	78919276	78919526	57.95	187.53	50.38	intronic	Ksr1
chr11	78966167	78966417	114.28	425.56	117.49	intergenic	Ksr1
chr11	79566638	79567081	72.29	277.98	52.17	intergenic	Mir365-2
chr11	80603263	80603697	180.02	471.55	81.51	intergenic	Myo1d
chr11	83326132	83326577	62.67	217.04	46.88	exonic	Gm11435
chr11	83972591	83973107	21.6	93.73	20.96	intronic	Acaca
chr11	85626269	85626519	61.53	291.56	63.95	promoter	Bcas3
chr11	86198888	86199138	15.9	84.59	15.05	intergenic	Med13
chr11	86611843	86612270	40.55	167.22	21.19	intronic	Dhx40
chr11	87690237	87690487	43.13	139.37	28.98	promoter	Epx
chr11	88192584	88192834	39.7	254.96	66.6	intronic	Msi2
chr11	88194584	88194834	70.92	304.38	104.16	intronic	Msi2
chr11	88466438	88466688	21.04	67.62	14.66	intronic	Msi2
chr11	90149213	90149615	49.39	208.19	55.8	intergenic	Mmd
chr11	93313853	93314859	77.4	586.08	92.32	intronic	Car10
chr11	93316688	93317087	42.97	120.69	31.18	intronic	Car10
chr11	93324632	93325011	26.05	98.91	18.13	intronic	Car10
chr11	94002006	94002256	16.07	74.43	19.55	intergenic	Spag9
chr11	94306654	94306904	76.58	178.52	41.42	intronic	Cacna1g
chr11	94370105	94370355	20.36	64.9	15.6	promoter	Mycbpap
chr11	94522454	94522704	44.31	126.46	32.04	intergenic	Mrpl27
chr11	94568976	94569226	31.71	89.06	16.08	intergenic	Gm11541
chr11	94857723	94857973	12.24	89	17.11	exonic	Ppp1r9b
chr11	95124726	95124976	45.23	195.3	50.02	intronic	Tac4
chr11	95704834	95705084	27.59	109.9	32.83	promoter	Abi3
chr11	96197842	96198092	28.8	103.22	23.83	intronic	Hoxb3
chr11	96780439	96780689	95.72	361.89	124.31	intronic	D030028A08Rik
chr11	97556337	97556587	42.41	160.16	43.12	intronic	Pcgf2
chr11	97619925	97620372	40.03	123.4	17.94	intronic	Cwc25
chr11	97665211	97665617	105.54	381.64	122.9	intronic	Lasp1
chr11	97669864	97670114	40.42	115.43	31.28	intronic	Lasp1
chr11	97670464	97670714	21.89	62.46	12.14	intronic	Lasp1
chr11	98057391	98057641	65.65	184.79	49.8	intergenic	Med1
chr11	98207417	98207667	79.13	212.97	46.5	intergenic	Ppp1r1b
chr11	98223145	98223591	144.19	298.89	65.33	intronic	Stard3
chr11	98445478	98445928	47.35	137.55	26.64	intronic	Ormdl3
chr11	98457242	98457492	16.72	69.16	10.35	intergenic	Gm12
chr11	99229551	99229899	14.14	66.58	12.34	intronic	Krt28
chr11	99239857	99240107	74.84	197.36	45.88	intergenic	Krt28
chr11	99307684	99308111	12.96	99.01	20.98	intergenic	Krt20
chr11	99333369	99333619	24.68	136.34	19.72	intergenic	Krt23
chr11	99333701	99334117	27.42	93.58	18.91	intergenic	Krt23
chr11	99879853	99880268	44.93	147.62	28.8	intergenic	Krt33a
chr11	100022823	100023073	27.56	83.14	21.75	intergenic	Krt19
chr11	100136154	100136404	71.97	292.41	99.85	intergenic	Krt42
chr11	100947343	100947793	86.79	226.42	43.38	promoter	Mlx
chr11	101315594	101315844	48.3	140.54	35.89	intronic	Ifi35
chr11	101529361	101529611	25.23	80.49	16.96	intergenic	Arl4d
chr11	101530361	101530811	112.54	313.44	71.88	intergenic	Arl4d
chr11	101789342	101789592	36.82	210.16	38.29	intergenic	AK076700
chr11	101793813	101794253	53.9	229.49	54.69	intergenic	AK076700
chr11	102244793	102245238	49.29	310.26	114.33	intergenic	Rundc3a
chr11	102965072	102965322	61.98	187.55	29.27	promoter	Acbd4
chr11	103219609	103219859	44.93	186.98	59.4	intronic	AK052773
chr11	103352770	103353205	84.53	375.87	78.37	intergenic	Gm884
chr11	105487494	105487897	31.22	106.29	28.95	intronic	Tanc2
chr11	105808922	105809372	129.59	522.32	93.81	intergenic	Cyb561
chr11	105809919	105810333	44.51	208.98	54.37	intergenic	Cyb561
chr11	105812044	105812294	83.91	196.36	41.67	intergenic	Cyb561
chr11	105939173	105939423	12.01	45.93	7.53	intergenic	Taco1
chr11	108723334	108723984	105.51	491.71	56.12	intergenic	Ccdc46
chr11	108785747	108785997	28.76	102.57	23.11	intronic	Axin2
chr11	108793316	108793566	9.69	38.98	8.48	intronic	Axin2
chr11	109560037	109560287	112.09	283.29	56.53	intronic	Fam20a
chr11	109769575	109769825	53.08	146.48	25.87	intergenic	Abca8b
chr11	109831879	109832129	36.33	131.28	39.35	intronic	Abca8b
chr11	111839904	111840154	16.72	107.98	36.48	intergenic	BC006965
chr11	113078306	113078705	14.73	112.48	20.23	intergenic	AK029086
chr11	113500155	113500405	23.63	101.92	31.12	intronic	Slc39a11
chr11	113586755	113587005	58.12	206.56	64.47	intronic	D11Wsu47e
chr11	114392186	114392631	30.8	108.19	20.47	intergenic	4932435O22Rik
chr11	114548529	114548779	13.94	46.14	8.6	intronic	Ttyh2
chr11	114734773	114735223	101	233.28	59.37	intergenic	Gprc5c
chr11	114993460	114993886	49.25	132.62	36.68	intronic	Cd300lf
chr11	115034589	115034839	34.1	157.13	53.45	intronic	Slc9a3r1
chr11	115038939	115039189	81.29	210.33	55.85	intronic	Slc9a3r1
chr11	115040939	115041189	16.98	69.25	14.34	intronic	Slc9a3r1
chr11	115042139	115042389	10.77	47.05	5.8	exonic	Slc9a3r1
chr11	115045539	115045789	28.9	109.88	30.72	intronic	Nat9
chr11	115319352	115319800	41.46	116.18	26.07	intergenic	Slc16a5
chr11	115701585	115701835	16.66	61.24	14.37	intronic	Llgl2
chr11	116068230	116068814	23.79	148.28	28.07	intronic	2310004N24Rik
chr11	116215840	116216287	100.5	350.28	52.13	exonic	Rnf157
chr11	116292853	116293103	42.74	109.2	25.72	intergenic	Fam100b
chr11	116298107	116298557	176.03	537.07	157.46	intronic	Fam100b
chr11	116960171	116960421	59.59	158.04	25.9	promoter	AK086245
chr11	117214463	117214913	117.81	327.46	69.78	exonic	2014-09-09
chr11	117691218	117691468	40.61	137.26	20.43	intronic	Syngr2
chr11	117714117	117714534	46.04	144.53	23.45	exonic	Birc5
chr11	117717278	117717706	61.66	210.99	22.46	intergenic	Birc5
chr11	117873751	117874001	52.43	188.22	61.71	intronic	Pgs1
chr11	117876751	117877001	47.03	155.42	40.76	intronic	Pgs1
chr11	118341543	118341793	25.4	77.38	12.96	intronic	Engase
chr11	118373781	118374231	108.82	622.64	208.53	intronic	Rbfox3
chr11	118731783	118732433	108.85	555.11	73.38	intronic	Rbfox3
chr11	118840115	118840544	67.08	303.2	47.84	intergenic	Enpp7
chr11	118847079	118847329	28.9	110.8	24.01	intergenic	Enpp7
chr11	118906327	118906577	70.29	218.15	48.97	intergenic	Cbx8
chr11	118910574	118910824	14.46	47.38	9.42	intergenic	Cbx8
chr11	118911786	118912036	59.2	181.94	14.55	intergenic	Cbx8
chr11	118914174	118914424	68.23	250.43	60.09	intergenic	Cbx8
chr11	118915174	118915424	15.58	52.36	11.21	intergenic	Cbx8
chr11	118998812	118999262	55.9	253.92	65.79	intergenic	Tbc1d16
chr11	119062072	119062322	26.93	109.53	36.17	intronic	Tbc1d16
chr11	119247820	119248070	20.42	68.21	13.72	intergenic	Mir1932
chr11	119778506	119778756	36.65	163.74	32.19	intronic	Chmp6
chr11	120029374	120029824	74.22	322.5	97.31	intergenic	Slc38a10
chr11	120110477	120110727	43.43	164.25	17.91	intronic	Bahcc1
chr11	120257132	120257382	65.68	172.79	35.81	intronic	Nploc4
chr11	120432399	120432649	118.37	286.04	62.01	intronic	P4hb
chr11	120492454	120492904	41.86	155.44	32.68	intronic	Mafg
chr11	121315045	121315295	15.25	92.72	12.04	intronic	Tbcd
chr11	121507777	121508027	63.32	160.35	24.25	intronic	B3gntl1
chr12	3837324	3837574	153.74	345.59	80.37	intronic	Dnmt3a
chr12	3903398	3903838	33.74	138.76	35	intronic	Dnmt3a
chr12	3920421	3920871	38.95	176.63	41.41	intergenic	Dnmt3a
chr12	5268819	5269269	45.45	242.4	42.95	intronic	Klhl29
chr12	5724365	5724762	17.97	100.74	20.88	intergenic	AK135963
chr12	5726433	5726683	17.9	85.7	12.67	intergenic	AK135963
chr12	5728508	5729072	23.24	187.69	19.35	intergenic	AK135963
chr12	5729937	5730321	23.79	84.28	21.95	intergenic	AK135963
chr12	5741513	5742321	47.56	378.62	41.79	intergenic	AK135963
chr12	5742748	5743380	53.64	635.5	43.53	intergenic	AK135963
chr12	5745470	5745720	25.59	127.86	18.94	intergenic	AK135963
chr12	5760545	5761187	36.65	465.1	43.95	intergenic	AK135963
chr12	5777932	5778982	93.57	1237.56	72.28	intergenic	AK135963
chr12	5825671	5826115	21.04	87.77	19.84	intronic	AK135963
chr12	5963496	5963746	16.43	145.53	17.13	intergenic	AK135963
chr12	7825868	7826318	26.83	203.36	39.68	intronic	AK043922
chr12	8358036	8358286	100.37	275.57	73.23	intergenic	Hs1bp3
chr12	8531675	8531925	52.72	155.12	42.28	intronic	AK050516
chr12	8562344	8562594	128.06	296.35	69.94	intronic	Slc7a15
chr12	8792295	8792545	48.69	114.46	22.86	intronic	Sdc1
chr12	8793136	8793586	133.06	514.03	162.48	intronic	Sdc1
chr12	8876848	8877264	13.48	59.05	13.48	intergenic	AK084679
chr12	12433272	12433522	39.24	120.85	19.31	intergenic	Fam49a
chr12	12719254	12719656	40.45	147.98	31.86	intergenic	Mycn
chr12	14214028	14214440	71.93	206.67	34.32	intergenic	Fam84a
chr12	14310972	14311222	45.65	117.05	28.22	intergenic	AY512908
chr12	16823489	16823912	48.93	260.11	25.89	intronic	E2f6
chr12	16897259	16897509	33.22	233.96	75.92	intergenic	Rock2
chr12	17542106	17542356	121.71	297.02	59.24	intergenic	Odc1
chr12	17739439	17739689	50.14	139.79	26.27	intronic	Hpcal1
chr12	17756615	17756865	115.06	326.55	86.89	intronic	Hpcal1
chr12	21148403	21148653	160.82	369.78	89.54	intronic	Asap2
chr12	25381346	25381596	83.19	210.87	48.64	intergenic	Rrm2
chr12	25837617	25837867	102.08	326.13	83.65	intergenic	Id2
chr12	27116651	27117086	31.74	153.89	24.68	intergenic	Rsad2
chr12	27160745	27160995	44.9	112.99	16.39	intronic	Cmpk2
chr12	27163534	27163784	23.01	74.78	16.78	exonic	Cmpk2
chr12	27173572	27173822	17.31	121.85	32.82	intergenic	Cmpk2
chr12	27278930	27279280	20.91	72.48	13.51	intergenic	Cmpk2
chr12	32753420	32753906	23.17	149.59	44.16	intergenic	Prkar2b
chr12	33699923	33700368	85.05	536.31	69.44	intergenic	Cdhr3
chr12	40822341	40822591	68.3	217.39	35.13	intronic	Scin
chr12	41775855	41776105	9.88	77.06	15.98	intronic	Immp2l
chr12	46199157	46199407	26.93	112.88	35.96	intergenic	Stxbp6
chr12	51225382	51225766	33.77	111.48	21.9	intergenic	Prkd1
chr12	52993775	52994025	41.92	235.79	79.32	intronic	Heatr5a
chr12	53080650	53081028	37.34	102.95	26.79	intergenic	6530401N04Rik
chr12	55479450	55479886	108.81	366.86	73.96	intergenic	Gm7550
chr12	55559969	55560219	55.99	180.03	49.52	intergenic	Gm7550
chr12	55722793	55723220	197.7	547.03	146.27	intergenic	1110002B05Rik
chr12	56568627	56569029	40.58	120	22.75	intergenic	Nfkbia
chr12	60267415	60267865	83.87	353.16	77.66	intronic	Ctage5
chr12	73040241	73040676	31.88	134.41	36.5	intronic	Daam1
chr12	74840904	74841154	31.58	144.02	37.12	intronic	Prkch
chr12	74841495	74841942	66.99	281.54	65.01	intronic	Prkch
chr12	76787693	76788175	27.23	107.7	20.01	intergenic	Wdr89
chr12	76799062	76799312	14.14	99.21	12.59	intergenic	Sgpp1
chr12	77680609	77681259	248.3	979.11	336.77	intergenic	Spnb1
chr12	78321322	78321738	31.71	150.22	38.93	intergenic	Fut8
chr12	78601596	78601846	41.43	116.02	23.88	intergenic	Fut8
chr12	81083411	81083661	43.82	109.63	26.33	intergenic	AK020496
chr12	81140298	81140548	11.42	42.2	10.04	intergenic	Zfp36l1
chr12	81228285	81228535	23.1	109.96	33.9	intronic	2310015A10Rik
chr12	84755822	84756072	39.93	106.04	26.68	intronic	Dpf3
chr12	85254610	85254860	16	63.87	18.54	intronic	Numb
chr12	85501537	85501787	28.8	82.77	19.19	intronic	C130039O16Rik
chr12	85521487	85521737	31.19	97.28	22.71	intronic	C130039O16Rik
chr12	85530368	85530818	66.4	236.71	74.42	intronic	C130039O16Rik
chr12	85603823	85604245	79.03	257.06	34.68	intergenic	Ptgr2
chr12	85953446	85953896	84.17	315.17	41.08	exonic	Abcd4
chr12	86479566	86480016	140.56	412.63	98.03	intronic	Rps6kl1
chr12	87279979	87280229	36.29	236.54	61.56	promoter	Ttll5
chr12	87935185	87935435	21.24	156.85	56.03	intergenic	Esrrb
chr12	101524125	101524531	26.8	205.81	23.19	intergenic	AK039577
chr12	102023661	102023911	56.09	138.8	31.24	promoter	9030617O03Rik
chr12	102991542	102991792	32.76	98.93	15.9	intronic	Fbln5
chr12	103669346	103669596	22.84	78.64	12.14	intronic	Lgmn
chr12	103921771	103922021	82.27	237.94	68.07	intronic	Itpk1
chr12	103962788	103963038	15.68	45.61	9.72	intergenic	Moap1
chr12	103963174	103963424	43.56	173.05	29	intergenic	Moap1
chr12	103964139	103964389	60.51	187.54	55.87	intergenic	Moap1
chr12	104894488	104894738	70.07	231.22	51.46	intronic	Serpina6
chr12	105383654	105384103	73.6	261.78	65.72	intergenic	Serpina3c
chr12	106092455	106092905	51.97	228.9	43.08	intronic	Clmn
chr12	106126109	106126559	118.27	393.98	77.36	intergenic	Clmn
chr12	109278557	109278985	74.64	284.61	82.25	intergenic	Bcl11b
chr12	109495871	109496121	31.25	134.3	42.64	intronic	Ccdc85c
chr12	109510651	109510901	27.49	147.44	47.37	intronic	Ccdc85c
chr12	109931604	109932025	54.33	235.06	69.61	intronic	Degs2
chr12	109956631	109957079	88.39	259.6	45.83	intergenic	Degs2
chr12	111451200	111451450	31.19	126.54	25.5	intronic	Ppp2r5c
chr12	111954154	111954604	94.35	315.75	64.17	intergenic	Hsp90aa1
chr12	112219902	112220152	37.01	136.87	36.12	intergenic	Ankrd9
chr12	112226412	112226803	25.72	117.07	29.25	intergenic	Ankrd9
chr12	112498070	112498511	82.14	213.89	47.49	intronic	Traf3
chr12	112594256	112594506	28.57	81.77	15.69	intronic	Cdc42bpb
chr12	112653162	112653412	46.73	129.22	18.94	intergenic	1200009I06Rik
chr12	112924566	112925016	97.58	270.49	51.75	intergenic	Trmt61a
chr12	113086803	113087053	154.59	391.01	70.56	intronic	Ppp1r13b
chr12	113347937	113348187	41.6	115.24	27.98	intronic	Aspg
chr12	113566414	113566864	100.17	299.75	49.82	intergenic	AK054515
chr12	113926611	113927061	271.4	711.46	167.64	intergenic	Zbtb42
chr12	114389096	114389346	50.63	152.93	42.96	promoter	Crip1
chr13	3795671	3796052	39.93	104.55	24.11	intergenic	Calml3
chr13	5770118	5770368	17.08	74.47	20.69	intergenic	AK006031
chr13	6128349	6128599	17.38	71.62	19.7	intergenic	Klf6
chr13	6642980	6643695	20.91	175.03	20.65	intronic	Pfkp
chr13	6885978	6886375	38.42	85.46	13.83	intergenic	AK135744
chr13	9888333	9888781	52.52	250	27.52	intronic	Chrm3
chr13	18179837	18180223	27.56	108.79	20.37	intergenic	Pou6f2
chr13	18180477	18180869	38.94	121.88	24.81	intergenic	Pou6f2
chr13	28590077	28590713	57.07	344.19	58.78	intronic	BC025054
chr13	31052716	31052966	10.7	61.46	16.94	intronic	Exoc2
chr13	31266630	31266880	11.16	39.6	5.45	intergenic	AK137190
chr13	31616774	31617024	110.71	358.18	85.83	intergenic	Foxq1
chr13	34145419	34145669	18.26	75.23	22.73	intronic	Bphl
chr13	34191088	34191722	27.13	346.04	30.83	intergenic	Tubb2a
chr13	34434424	34434827	28.7	141.72	34.27	intronic	Slc22a23
chr13	35300063	35300313	50.72	156.97	39.6	intergenic	AK005856
chr13	35321361	35322011	118.99	423.83	68.21	intergenic	AK005856
chr13	38222146	38222552	98.21	352.21	86.14	intergenic	Dsp
chr13	41500979	41501229	16.66	56.04	13.84	intronic	Nedd9
chr13	41918435	41918685	37.21	135.18	31.17	intronic	9530008L14Rik
chr13	43630765	43631015	86	272.26	63.38	intergenic	Ccdc90a
chr13	44267096	44267346	61.62	202.27	50.32	intergenic	AK136877
chr13	44280430	44280880	66.63	252.6	80.04	intergenic	AK136877
chr13	45150089	45150519	55.67	194.61	34.49	intergenic	AK033041
chr13	45190897	45191147	11.98	104.94	18.58	intergenic	AK033041
chr13	45443244	45443694	110.42	392.01	109.64	intergenic	Mylip
chr13	51211433	51211683	34.16	127.85	33.09	intronic	Spin1
chr13	51968412	51969062	161.77	515.53	95.85	intergenic	Gadd45g
chr13	52113336	52113783	240.3	634.13	171.39	intergenic	AK029587
chr13	52152902	52153152	43.62	140.25	38.26	intergenic	AK029587
chr13	52235571	52235821	12.86	42.39	7.49	intergenic	AK014969
chr13	52284035	52284485	65.78	336.4	91.28	intergenic	AK014969
chr13	52626532	52626782	49.65	146.3	32.25	promoter	Diras2
chr13	52697985	52698425	259.02	655.82	142.79	intronic	Sykb
chr13	52707698	52707948	35.57	137.45	39.49	exonic	Sykb
chr13	53017361	53017611	46.57	156.74	38.09	intronic	Auh
chr13	53019564	53019814	22.88	73.19	14.16	intronic	Auh
chr13	54796862	54797112	12.34	50.48	5.56	promoter	Rnf44
chr13	54797262	54797712	125.04	328.23	49.86	promoter	Rnf44
chr13	55261112	55261362	28.9	169.9	61.52	exonic	Fgfr4
chr13	56012329	56012579	20	130.82	26.75	intergenic	Pitx1
chr13	56015669	56015919	15.22	77.75	14.9	intergenic	Pitx1
chr13	56225200	56225650	73.57	238.06	45.04	intronic	H2afy
chr13	56302754	56303204	62.97	496.77	118.67	intergenic	Tifab
chr13	56538288	56538538	42.19	182.96	59.76	promoter	Slc25a48
chr13	56545549	56545989	40.81	247.83	58.82	intronic	Slc25a48
chr13	56562778	56563228	46.21	254.26	59.59	intronic	Slc25a48
chr13	56567728	56568155	25.46	346.28	24.11	intronic	Slc25a48
chr13	58467689	58468100	38.42	127.79	24.5	intergenic	Kif27
chr13	59015594	59015844	22.71	96.37	28.54	intronic	Ntrk2
chr13	62970456	62970706	46.6	176.12	20.4	exonic	Fbp1
chr13	63363697	63363947	37.08	134.18	31.97	intronic	2010111I01Rik
chr13	64381449	64381981	41.6	157.5	33.15	intergenic	Cdc14b
chr13	67024734	67024984	47.16	153.68	26.85	intronic	Mterfd1
chr13	67057579	67057829	30.04	172.54	34.95	intronic	Ptdss1
chr13	67072100	67072539	64.34	226	45.59	intronic	Ptdss1
chr13	67081621	67081871	25.33	72.5	17.41	intronic	Ptdss1
chr13	67130851	67131101	77.26	235.64	51.54	intergenic	Zfp712
chr13	73873368	73873618	35.15	162.55	46.21	intronic	Slc12a7
chr13	74139130	74139380	22.52	141.19	33.44	intergenic	Tppp
chr13	76372965	76373215	18.2	63.24	7.52	intergenic	AK136039
chr13	81069289	81069719	56.78	217.43	35.46	intergenic	AK017339
chr13	86532789	86533039	14.11	63.07	10.38	intergenic	Cox7c
chr13	90865291	90865541	21.08	73.29	11.01	intergenic	Atp6ap1l
chr13	91390700	91390950	32.4	202.49	77.69	intergenic	Atg10
chr13	94940855	94941105	40.45	173.92	28.81	intronic	Lhfpl2
chr13	96321895	96322345	77.3	358.85	82.7	intergenic	F2rl1
chr13	96623322	96623746	123.21	380.58	74.42	intronic	Iqgap2
chr13	98038604	98039009	34.04	113.97	30.49	intergenic	Enc1
chr13	98220199	98220449	91.76	222.14	54.25	intronic	BC065997
chr13	98391102	98391752	58.25	292.46	43.82	intergenic	AK045624
chr13	98405708	98405958	7.04	64.1	14.12	intergenic	AK045624
chr13	98758843	98759093	24.58	88.61	26.05	intronic	Rgnef
chr13	100870051	100870301	45.55	120.96	27.86	intronic	Bdp1
chr13	101284045	101284295	30.6	77.19	16.02	intronic	Ocln
chr13	102291860	102292504	71.48	362.16	78.13	intergenic	Pik3r1
chr13	102548806	102549306	38.42	139.46	27.48	intergenic	Pik3r1
chr13	104815924	104816174	9.26	50.43	5.14	intronic	Nln
chr13	108830039	108830289	45.59	144.89	17.43	intergenic	2810008M24Rik
chr13	109205551	109205801	106.42	258.2	63.45	intergenic	Depdc1b
chr13	109754315	109754565	20.49	113.85	34.01	intronic	Pde4d
chr13	110218499	110218909	39.24	218.19	49.32	intronic	Pde4d
chr13	112462379	112462629	41.86	153.32	47.23	intergenic	Mier3
chr13	112863681	112864122	31.78	171.33	58.44	intergenic	AK134426
chr13	114370745	114371181	61.82	182.52	40.88	intergenic	Snx18
chr13	115274991	115275241	9.69	56.66	11.77	intergenic	Fst
chr13	115600293	115600543	76.84	173.38	37.59	intergenic	Mocs2
chr13	116396564	116396814	11.78	71.74	11.61	intergenic	Itga1
chr13	116463981	116464393	43.2	201.83	62.86	intergenic	Itga1
chr13	116473857	116474107	13.81	113.17	19.99	intergenic	Itga1
chr13	116474251	116474501	6.45	79.02	10.85	intergenic	Itga1
chr13	116604340	116604745	19.54	127.38	13.02	intergenic	Isl1
chr14	9097502	9097940	26.87	200.32	50.42	intergenic	Acox2
chr14	9199090	9199340	14.07	64.86	9.46	intronic	Oit1
chr14	9202290	9202540	27.56	78.13	15.62	intronic	Oit1
chr14	11654346	11654596	27.26	96.62	25.31	intronic	Fhit
chr14	12408406	12408803	28.47	113.41	22.4	intronic	Ptprg
chr14	12464634	12464884	8.64	46.95	9.16	intronic	Ptprg
chr14	12517930	12518180	47.78	139.69	22.51	intronic	Ptprg
chr14	18546950	18547400	102.89	288.47	52.01	intronic	Thrb
chr14	19507180	19507430	54.29	150.37	42.29	intronic	Ube2e2
chr14	21025266	21025516	31.12	87.61	18.87	intergenic	Kcnk5
chr14	22315998	22316248	22.58	109.25	18.36	intergenic	Myst4
chr14	22649168	22649418	7.49	34.71	8.11	promoter	Vdac2
chr14	26042760	26043010	17.41	72.88	20.29	intergenic	AK086741
chr14	26169425	26170041	145.36	506.07	131.1	intronic	AK086741
chr14	26188524	26188774	31.45	76.59	14.93	intronic	AK086741
chr14	26274524	26274774	18.2	112.54	16.1	intronic	AK086741
chr14	26326223	26326673	72.36	296.05	47.31	intronic	Zmiz1
chr14	26557033	26557283	99.65	418.76	129.88	intronic	Zcchc24
chr14	27981376	27981934	49.09	251.95	44.13	intronic	Arhgef3
chr14	28481482	28481732	83.05	198.45	45.34	intronic	Erc2
chr14	28489954	28490379	26.54	191.04	41.11	intronic	Erc2
chr14	28528854	28529284	49.87	241.12	35.18	intronic	Erc2
chr14	29303675	29303925	37.6	99.45	15.35	intergenic	Erc2
chr14	29705710	29706124	41.99	230.99	59.92	intergenic	Cacna2d3
chr14	30885824	30886272	58.03	275.57	40.9	intronic	Cacna1d
chr14	31284861	31285260	38.03	127.1	28.47	intronic	Cacna1d
chr14	31447050	31447300	8.57	40.45	5.69	intergenic	Prkcd
chr14	31456045	31456295	72.94	263.6	80	intergenic	Rft1
chr14	32229290	32229540	56.25	197.35	64.67	intronic	Sh3bp5
chr14	33594069	33594635	47.09	239.02	31.67	intergenic	1810011H11Rik
chr14	33595305	33595755	30.5	135.32	39.77	intergenic	1810011H11Rik
chr14	48803202	48803452	33.97	80.08	11.48	intronic	Peli2
chr14	49878182	49878432	49.94	228.37	62.15	intergenic	1700011H14Rik
chr14	49878779	49879029	66.83	256.12	86.61	intergenic	1700011H14Rik
chr14	51721077	51721327	31.12	117.12	27	intronic	Rnase4
chr14	51726169	51726619	50.79	300.36	85.55	intergenic	Rnase4
chr14	55005719	55005969	46.04	159.25	34.87	intronic	Slc7a7
chr14	56204613	56204863	77.89	172	28.43	promoter	Fam158a
chr14	56347599	56347849	27.91	114.33	14.95	intergenic	Rabggta
chr14	56658718	56658968	57.53	237.52	79.87	promoter	Mcpt2
chr14	58015537	58015987	36.85	197.37	35.69	intronic	Cryl1
chr14	58045229	58045646	34.2	133.32	14.91	intronic	Ift88
chr14	58151451	58151894	49.48	153.28	21.66	intronic	Il17d
chr14	58289233	58289883	30.04	255.04	63.96	intronic	Lats2
chr14	58799796	58800046	32.23	139.61	47.15	intergenic	Fgf9
chr14	59330816	59331217	39.34	130.39	28.55	intergenic	1700129C05Rik
chr14	63879728	63880176	75.66	248.9	53.08	intronic	Gata4
chr14	63948396	63948646	12.24	92.23	11.35	intergenic	Blk
chr14	64052876	64053126	87.94	277.5	75.85	intergenic	Fam167a
chr14	66613887	66614137	38.42	118.51	27.98	intronic	Gulo
chr14	67791583	67791833	28.9	220.52	48.23	intergenic	Ebf2
chr14	68542881	68543531	139.57	582.3	159.83	intronic	Dock5
chr14	68588541	68588791	73.77	231.71	56.38	intergenic	Dock5
chr14	69875219	69875669	198.55	683.7	121.98	intronic	Slc25a37
chr14	69893675	69894125	161.47	384.06	71.01	intronic	Slc25a37
chr14	69894275	69894725	224.66	685.66	176.1	intronic	Slc25a37
chr14	69897075	69897325	61.59	241.6	54.66	intronic	Slc25a37
chr14	69900225	69900475	36.2	105.48	19.34	intronic	Slc25a37
chr14	69904675	69904925	23.37	155.95	61.18	promoter	Slc25a37
chr14	69933093	69933343	95.72	422.68	105.5	intergenic	AK046150
chr14	70487099	70487549	35.18	194.21	41.22	intergenic	Egr3
chr14	70490608	70491431	220.31	739.65	157.9	intergenic	Egr3
chr14	70913025	70913615	66.89	335.58	48.93	intronic	Bmp1
chr14	70996627	70996877	17.51	79.15	20.36	intronic	Fam160b2
chr14	72855996	72856646	101.49	538.29	138.29	intergenic	Fndc3a
chr14	72877218	72877468	19.31	49.39	8.31	intergenic	Fndc3a
chr14	72933698	72934127	186.56	466.08	88.85	intergenic	Fndc3a
chr14	73537478	73537728	36.32	87.95	17.34	intergenic	Rcbtb2
chr14	75046127	75046566	204.89	518.84	151.18	intronic	Htr2a
chr14	77698106	77698541	27.1	271.54	29.53	intronic	Enox1
chr14	80403011	80403261	58.81	131.85	23.11	intronic	Olfm4
chr14	80429277	80429869	51.94	266.18	29.42	intergenic	Olfm4
chr14	99782474	99782864	28.73	108.01	25.64	intergenic	Klf5
chr14	99906063	99906503	31.94	229.18	50.25	intergenic	Klf5
chr14	106099491	106099741	21.27	65.6	13.48	intergenic	AK045385
chr14	115226109	115226553	29.81	179.63	40.36	intergenic	AK015607
chr14	121775463	121775713	13.03	91.88	16.11	intronic	Stk24
chr14	122389283	122389533	35.54	130.83	29.42	intronic	Ubac2
chr15	5752290	5752540	19.44	66.59	17.85	intergenic	BC023070
chr15	6329799	6330049	15.12	98.9	34.61	intronic	Dab2
chr15	10159145	10159395	42.18	96.56	18.26	intronic	Prlr
chr15	10945909	10946159	13.52	62.3	10.86	intronic	Slc45a2
chr15	12758158	12758608	47.09	201.55	25.29	intronic	Drosha
chr15	16555063	16555313	21.21	125.01	17.99	intergenic	Cdh9
chr15	31166070	31166320	29.26	141.12	32.53	intronic	Dap
chr15	36427775	36428199	17.84	81.95	17.32	promoter	Ankrd46
chr15	36728943	36729593	63.23	234.16	36.8	intergenic	Ywhaz
chr15	36857072	36857516	33.48	161.5	49.75	intergenic	Zfp706
chr15	38322138	38322588	79.26	243.18	63.78	intergenic	Klf10
chr15	38399424	38399674	20.39	64.05	14.69	intergenic	Azin1
chr15	39637417	39637667	14.66	58.06	11.33	intronic	Dpys
chr15	52796096	52796346	27	60.26	8.67	intergenic	Ext1
chr15	53017592	53017992	25.82	195.63	18.36	intronic	Ext1
chr15	53929097	53929500	27.92	186.1	48.85	intergenic	Tnfrsf11b
chr15	55006881	55007131	18.2	68.2	15.64	intronic	Deptor
chr15	55017989	55018413	67.68	349.22	62.4	intronic	Deptor
chr15	57997946	57998196	12.4	67.67	12.56	intergenic	Wdyhv1
chr15	58039646	58039896	30.63	167.86	58.97	intronic	Fbxo32
chr15	58228949	58229199	49.58	136.18	19.89	intergenic	Anxa13
chr15	58659745	58659995	85.84	223.48	44.6	intergenic	Tmem65
chr15	58924052	58924302	158.85	414.93	97.54	intergenic	Mtss1
chr15	59230095	59230345	53.96	139.28	31.94	intronic	Nsmce2
chr15	59331636	59331886	19.31	79.56	18.29	intronic	Nsmce2
chr15	59666132	59666692	72.88	269.33	44.24	intergenic	AK035211
chr15	59806200	59806622	38.13	147.11	29.06	intergenic	4933412E24Rik
chr15	64149668	64149918	116.54	256	48.2	intronic	Asap1
chr15	64189575	64190225	140.34	495.03	96.42	intronic	Asap1
chr15	64602824	64603074	11.88	60.94	17.39	intronic	Adcy8
chr15	64604078	64604646	47.12	207.43	33.62	intronic	Adcy8
chr15	64716336	64716786	42.77	215.75	22.89	intronic	Adcy8
chr15	64721942	64722376	53.34	414.15	97.98	intronic	Adcy8
chr15	64722998	64723648	50.11	185.69	35.16	intronic	Adcy8
chr15	64727217	64727467	19.41	57.46	12.96	intronic	Adcy8
chr15	64740203	64740453	19.28	61.31	15.33	intronic	Adcy8
chr15	64740575	64741011	152.53	495.3	143.29	intronic	Adcy8
chr15	64746907	64747157	15.12	46.34	7.1	intronic	Adcy8
chr15	65464022	65464405	16.72	82.85	16.69	intergenic	Efr3a
chr15	65803732	65804534	61.46	379.24	74.58	intronic	Hhla1
chr15	66759036	66759482	53.25	192.01	54.17	intergenic	Ndrg1
chr15	66950504	66950952	119.91	297.98	58.37	intronic	St3gal1
chr15	72598194	72598444	41.07	160.53	33.53	intronic	Trappc9
chr15	72954194	72954444	33.22	112.85	22.14	exonic	Eif2c2
chr15	73303838	73304287	58.39	212.82	31.08	intergenic	Dennd3
chr15	74548612	74548862	45.98	180.34	60.96	intergenic	Psca
chr15	74633783	74634203	74.91	230.91	65.68	intergenic	Ly6k
chr15	74706836	74707086	32.56	104.56	29.95	intergenic	2010109I03Rik
chr15	74801403	74801839	76.54	276.6	69.91	intergenic	Ly6i
chr15	75213543	75214179	74.94	284.16	38.44	intergenic	9030619P08Rik
chr15	75837512	75837762	100.17	411.46	148.84	intronic	Fam83h
chr15	76028840	76029090	52.26	180.05	53.25	promoter	Plec
chr15	76321542	76321792	49.22	108.33	21.55	intronic	Hsf1
chr15	76336037	76336487	269.46	676.61	169.95	intronic	Dgat1
chr15	76365119	76365369	28.5	111.84	29.82	intergenic	Fbxl6
chr15	76372765	76373015	53.05	144.31	27.64	intergenic	Gpr172b
chr15	76389309	76389559	36.82	86.78	15.54	intergenic	Gpr172b
chr15	76414349	76414599	71.7	195.21	48.68	intronic	Adck5
chr15	76431234	76431684	79.1	241.22	47.9	exonic	Cpsf1
chr15	76526349	76526798	232.48	881.38	245.56	promoter	Gpt
chr15	76550267	76550517	32.63	131.05	19.1	intronic	Lrrc24
chr15	76835031	76835281	18.07	70.78	20.82	intergenic	Mb
chr15	77299838	77300088	20.06	62.87	13.07	intergenic	Apol10a
chr15	77497613	77498008	18.2	66.78	14.15	intergenic	Apol11b
chr15	78183992	78184242	29.06	112.47	33.47	exonic	Csf2rb
chr15	78683889	78684339	37.86	156.71	28.72	intronic	Lgals2
chr15	79170292	79170542	22.25	68.36	13.72	intergenic	Maff
chr15	79294697	79295301	121.8	627.25	128.79	intergenic	Kcnj4
chr15	79994208	79994458	92.61	325.5	77.79	intergenic	Tab1
chr15	79996249	79996499	15.74	108.96	19.32	intergenic	Tab1
chr15	80076387	80076637	26.77	74.54	10.42	intronic	Smcr7l
chr15	81023345	81023795	58.48	392.79	27	intergenic	4930483J18Rik
chr15	81612579	81613029	58.45	407.15	48.74	intronic	Zc3h7b
chr15	81711479	81711729	50.63	131.57	23.07	intronic	Aco2
chr15	81728038	81728288	71.31	156.36	31.94	intronic	Polr3h
chr15	81836733	81837128	47.52	130	32.74	intronic	Pppde2
chr15	81939290	81939540	30.7	99.29	16.11	intronic	Mei1
chr15	82015145	82015395	33.45	101.51	26.18	intronic	Srebf2
chr15	82474435	82474685	16.79	50.58	11.05	promoter	Cyp2d13
chr15	82577889	82578339	77.17	263.9	56.66	intergenic	Cyp2d40
chr15	82618236	82618686	50.69	249.36	43.2	intergenic	Cyp2d26
chr15	82933994	82934628	40.81	364.71	31.66	intronic	Serhl
chr15	83266766	83267016	27.88	78.51	19.18	intronic	Pacsin2
chr15	84851109	84851747	94.68	313.18	39.25	exonic	Upk3a
chr15	84984616	84984866	53.83	173.42	24.12	intronic	AK085771
chr15	85562978	85563424	48.73	193.04	41.22	intergenic	Ppara
chr15	85772910	85773160	63.23	229.12	41.2	intronic	Celsr1
chr15	85773304	85773554	48.21	137.54	26.28	intronic	Celsr1
chr15	85895080	85895330	47.39	140.59	34.55	intronic	Gramd4
chr15	85915518	85915768	46.31	132.46	23.36	intronic	Gramd4
chr15	88684682	88684932	95.66	265.94	44.33	intergenic	Pim3
chr15	89005423	89005673	38.45	160.29	29.8	promoter	Plxnb2
chr15	89019892	89020142	49.38	120.29	15.15	promoter	Fam116b
chr15	89032505	89032755	42.05	101.86	19.29	intergenic	Fam116b
chr15	90452381	90452786	47.06	145.94	34.25	intronic	Cpne8
chr15	94390208	94390458	30.73	76.31	13.34	intronic	Irak4
chr15	96075128	96075378	63.78	167.77	34.21	intronic	AK163711
chr15	96564657	96565301	84.07	470.45	158.25	intergenic	Slc38a2
chr15	97785137	97785576	147.23	412.1	64.23	intergenic	Tmem106c
chr15	98583546	98583796	63.36	183.42	22.65	intronic	Arf3
chr15	98624961	98625211	22.68	69.99	13.78	intergenic	Wnt1
chr15	98710934	98711184	51.28	185.58	34.06	intronic	Rhebl1
chr15	99522519	99522769	39.5	144.86	30	promoter	Accn2
chr15	99584750	99585200	82.83	260.72	37.46	intronic	Lass5
chr15	100631496	100631746	100.8	359	72.64	intronic	Slc4a8
chr15	101215393	101215843	66.44	327.82	43.65	intronic	AK138921
chr15	101348747	101348997	14.11	81	29.59	intronic	Krt6a
chr15	101541017	101541467	119.22	603.24	120.23	exonic	Krt5
chr15	101578847	101579297	64.77	171.45	40.96	intergenic	Krt71
chr15	101835698	101836148	121.08	398.79	96.66	promoter	Krt8
chr15	101839367	101839617	38.39	116.31	23.45	intergenic	Krt8
chr15	101853226	101853476	30.07	103.46	30.05	intergenic	Krt18
chr15	101980043	101980293	179.74	388.7	84.14	promoter	Soat2
chr15	102206614	102206864	35.44	146.88	33.58	intergenic	Sp7
chr15	102360831	102361272	130.84	475.08	131.3	intronic	Atf7
chr16	4024300	4024550	37.37	98.3	21.53	intergenic	Dnase1
chr16	4033293	4033543	58.84	161.06	36.37	intergenic	Dnase1
chr16	5366715	5366965	61.62	162.15	33.9	intergenic	Fam86
chr16	8491830	8492278	121.42	726.73	242.89	intergenic	BC024814
chr16	8539851	8540101	22.58	94.15	21.05	intronic	Abat
chr16	9672394	9672844	122.34	584.46	61.24	intronic	Grin2a
chr16	9958425	9958675	31.29	121.43	30.07	intronic	Grin2a
chr16	9973778	9974028	26.15	104.69	20.58	intronic	Grin2a
chr16	10040143	10040587	44.12	283.94	41.14	intergenic	Grin2a
chr16	10334628	10334878	18.49	84.3	27.54	intergenic	AK028773
chr16	10340751	10341177	52.62	394.46	61.78	intergenic	AK028773
chr16	10454184	10454434	69.34	204.53	57.66	intergenic	Fam18a
chr16	10496180	10496430	91.5	221.74	44.77	intronic	Ciita
chr16	10879867	10880117	67.88	189.82	45.28	intronic	A630055G03Rik
chr16	10981131	10981381	46.73	230.41	67.02	intronic	Litaf
chr16	10989474	10989724	34.33	114.92	34.21	intronic	Litaf
chr16	11583005	11583255	38.36	155.25	39.66	intronic	Snx29
chr16	13116845	13117095	64.21	186.37	52.91	intronic	Ercc4
chr16	14059700	14059950	13.19	65.63	5.63	intronic	2900011O08Rik
chr16	14298538	14298968	58.02	224.37	42.99	intergenic	0610037P05Rik
chr16	16978620	16978870	32.47	163.8	41.85	intergenic	Mapk1
chr16	18074817	18075067	54.85	199.55	41.35	intronic	Prodh
chr16	18081639	18081889	75.01	160.03	32.18	intronic	Prodh
chr16	18082639	18082889	102.17	384.24	130.65	intronic	Prodh
chr16	18084439	18084689	36.03	99.45	21.76	intronic	Prodh
chr16	18411697	18411947	92.94	219.77	50.11	exonic	Comt
chr16	18451646	18451896	20.62	86.52	13.56	intronic	Txnrd2
chr16	18535957	18536393	43.43	261.47	34.11	intronic	Gnb1l
chr16	18631656	18631906	50.92	162.39	32.91	promoter	2014-09-05
chr16	20063009	20063259	17.12	88.45	12.07	intergenic	Klhl24
chr16	24288335	24288585	14.63	84.06	8.43	intergenic	AK039760
chr16	24717402	24717652	22.35	137.3	45.99	intronic	Lpp
chr16	24777237	24777487	35.47	111.48	30.51	intronic	Lpp
chr16	28247021	28247438	39.3	117.52	28.15	intronic	Fgf12
chr16	28863723	28863973	48.4	225.23	73.63	intronic	1600021P15Rik
chr16	29765982	29766232	9.13	29.55	3.35	intergenic	AK144120
chr16	29929827	29930224	143.18	334.76	71.42	intronic	AK165338
chr16	29963860	29964110	19.96	100.99	24.13	intronic	Gm1968
chr16	30064980	30065230	23.53	96.24	28.47	promoter	Hes1
chr16	30110633	30110883	12.57	67.73	14.44	intergenic	Hes1
chr16	30495159	30495409	71.54	245.41	81.51	intergenic	Tmem44
chr16	32502713	32502963	22.68	92.16	29.93	intronic	Zdhhc19
chr16	32659838	32660288	141.78	433.04	54.44	intronic	Tnk2
chr16	33143301	33143551	37.05	142.49	20.18	intergenic	Lmln
chr16	33179904	33180154	20.85	74.1	15.15	intergenic	Osbpl11
chr16	33760717	33761103	52.29	163.37	41.43	intronic	Heg1
chr16	33773098	33773348	59.3	158.94	35.58	intronic	AK153575
chr16	33995649	33995899	84.27	249.2	70.95	intronic	Kalrn
chr16	34090718	34091115	68.95	253.81	50.88	intronic	Kalrn
chr16	34904052	34904502	192.23	474.22	105.29	intronic	Mylk
chr16	34913258	34913508	29.16	141.17	49.01	intronic	Mylk
chr16	35761283	35761533	40.68	95.57	18.21	intronic	Dirc2
chr16	37530140	37530587	57.73	179.85	32.34	intronic	Gtf2e1
chr16	38536448	38536698	60.15	141.73	27.55	intronic	Poglut1
chr16	39672719	39673162	38.09	168.84	25.62	intergenic	Lsamp
chr16	39754383	39754776	19.51	64.78	9.42	intergenic	Lsamp
chr16	45961148	45961398	41.43	119.32	20.85	exonic	Plcxd2
chr16	49854282	49854532	38.91	195.24	27.19	promoter	Cd47
chr16	56187058	56187308	69.64	231.55	42.16	intronic	Senp7
chr16	56306296	56306546	20.39	78.66	20.54	intergenic	Impg2
chr16	56441320	56441570	28.18	118.04	36.43	intergenic	Abi3bp
chr16	56441920	56442170	29.59	97.34	28.74	intergenic	Abi3bp
chr16	56489469	56489719	10.8	114.55	9.36	intronic	Abi3bp
chr16	56491357	56492153	41.76	324.27	45.53	intronic	Abi3bp
chr16	56492267	56492699	14.7	92.56	16.24	intronic	Abi3bp
chr16	56493645	56494175	28.6	153.85	32	intronic	Abi3bp
chr16	56502310	56502746	54.42	159.7	41.44	intronic	Abi3bp
chr16	56510666	56510916	28.01	124.5	19.02	intronic	Abi3bp
chr16	56549065	56549475	60.25	274.02	68.97	intronic	Abi3bp
chr16	57488630	57488880	6.06	45.78	12.21	intronic	2610528E23Rik
chr16	66021995	66022445	19.41	118.12	26.25	intergenic	Vgll3
chr16	76509311	76509689	17.31	110.88	34.44	intergenic	Nrip1
chr16	78116872	78117296	32.04	90.74	23.53	intergenic	AK087725
chr16	78121988	78122423	75.01	426.25	96.91	intergenic	AK087725
chr16	85143477	85143727	22.25	90.65	6.16	intronic	App
chr16	91594301	91594726	83.12	198.06	42.18	intronic	Tmem50b
chr16	92496731	92496981	29.49	86.75	22.29	promoter	Clic6
chr16	93722682	93723132	64.28	317.09	102.34	intronic	Dopey2
chr16	94754654	94754904	32.07	178.01	62.07	intergenic	Dscr3
chr16	94796521	94796771	40.48	129.08	33.93	intronic	Dyrk1a
chr16	95908463	95908713	61.46	232.73	70.23	intergenic	Ets2
chr16	97816130	97816380	48.73	132.96	30.43	intronic	Tmprss2
chr16	97820733	97820983	63.19	154.93	30.65	intronic	Tmprss2
chr16	97843400	97843650	8.67	37.21	6.88	intergenic	Tmprss2
chr16	97976915	97977165	69.51	175.88	36.21	intronic	Ripk4
chr16	97979017	97979267	32.14	137.62	48.47	intronic	Ripk4
chr16	98146741	98146991	18.56	65.61	11.76	intergenic	C2cd2
chr17	3315476	3315726	20.32	122.05	34.24	intergenic	Scaf8
chr17	3617349	3617799	42.42	186.21	25.64	intergenic	Nox3
chr17	4977194	4977444	19.44	118.98	22.92	intergenic	Arid1b
chr17	5795437	5795687	32.95	129.52	24.88	intergenic	AK077272
chr17	5862336	5862776	68.98	198.95	38.02	intronic	Snx9
chr17	6074817	6075067	33.15	83.25	15.49	intronic	Serac1
chr17	7028730	7029144	39.7	139.85	9.16	intronic	AK037830
chr17	7604092	7604342	19.93	98.52	30.16	intergenic	Gm9992
chr17	12395927	12396177	42.02	109.36	25.33	intronic	Agpat4
chr17	12401484	12401734	135.61	320.33	65.63	intronic	Agpat4
chr17	12485788	12486638	138.07	487.62	130.55	intronic	Map3k4
chr17	12516213	12516663	58.94	274.81	91.3	intronic	AK029100
chr17	13338966	13339369	25.85	148.82	24.89	intronic	Gm9880
chr17	13635034	13635435	29.19	119.81	36.96	intergenic	BC068229
chr17	13853337	13853987	121.91	605.99	101.56	intronic	Tcte2
chr17	13874695	13874945	31.81	180.69	35.54	intronic	Tcte2
chr17	14110687	14111069	20.36	97.7	27.27	intergenic	Gm7168
chr17	14168278	14168768	46.83	179.75	25.7	intergenic	Gm7168
chr17	14587333	14587783	50.69	206.97	39.24	intergenic	Smoc2
chr17	14696526	14696947	102.37	339.68	38.64	intergenic	Thbs2
chr17	15214991	15215430	129.72	324.54	70.27	intergenic	2210404J11Rik
chr17	15312241	15312691	91.21	252.79	65.42	intergenic	2210404J11Rik
chr17	15334145	15334395	66.96	232.51	62.56	intergenic	2210404J11Rik
chr17	20039789	20040174	18.43	69.66	18.93	intergenic	Vmn2r103
chr17	21350820	21351270	51.35	299.49	52.98	intergenic	Vmn1r234
chr17	24129755	24130005	106.29	327.4	86.33	intergenic	Prss22
chr17	24144348	24144598	146.61	303.48	59.69	intergenic	Prss22
chr17	24160098	24160348	48.37	156.6	30.57	intergenic	Prss27
chr17	24195953	24196203	69.47	247.97	45.5	exonic	Kctd5
chr17	24291378	24291813	118.66	313.44	42.09	intergenic	Amdhd2
chr17	24353772	24354222	44.21	164.07	25.81	intronic	AK017296
chr17	24614279	24614529	14.5	84.11	16.03	exonic	Mlst8
chr17	25732574	25732824	72.36	379.01	97.17	intronic	Lmf1
chr17	25892956	25893406	103.29	464.23	88.44	promoter	Msln
chr17	25940055	25940490	65.19	290.41	80.68	intergenic	Fbxl16
chr17	25956517	25956767	103.84	371.77	98.92	exonic	Fbxl16
chr17	26021687	26022137	96.84	273.93	71.54	exonic	Rab40c
chr17	26377702	26377952	38.52	107.97	27.16	intronic	Itfg3
chr17	26649324	26649574	24.35	71.51	12.87	intergenic	Dusp1
chr17	26651509	26651759	39.56	206.68	44.83	intergenic	Dusp1
chr17	26721024	26721474	137.97	570.8	172.05	intronic	Ergic1
chr17	27093243	27093893	46.77	279.85	20.9	promoter	DQ716012
chr17	27239826	27240276	73.76	353.01	82.67	promoter	AK131746
chr17	27330411	27331061	65.81	277.4	54.04	exonic	Lemd2
chr17	27455985	27456235	37.57	198.18	31.05	promoter	DQ716236
chr17	27762827	27763240	47.22	148.97	24.35	intergenic	Nudt3
chr17	27856509	27856959	316.09	952.95	257.82	exonic	Spdef
chr17	27941723	27941973	58.97	240.9	85.46	intronic	D17Wsu92e
chr17	28366302	28366552	13.42	39.79	6.78	intergenic	Def6
chr17	28381639	28381889	44.41	114.85	17.21	intronic	Ppard
chr17	28929767	28930417	137.22	405.36	63.28	intergenic	Brpf3
chr17	28945724	28945974	34.49	106.38	30.46	promoter	Brpf3
chr17	28946279	28946714	90.52	237.75	48.2	promoter	Brpf3
chr17	28973283	28973733	87.11	234.63	49.65	exonic	Brpf3
chr17	29389324	29389574	65.42	240.88	73.46	intronic	Ppil1
chr17	29568572	29568822	29.72	128.23	16.93	intergenic	Fgd2
chr17	29861168	29861418	34.56	117.75	35.56	intergenic	1110021J02Rik
chr17	30314401	30314651	84.3	235.47	60.38	intronic	Zfand3
chr17	30988065	30988315	51.87	179.67	24.53	intronic	Dnahc8
chr17	31266552	31266802	127.57	312.81	83.19	promoter	Tff3
chr17	31618089	31618339	86.04	251.84	72.53	intergenic	Pde9a
chr17	31803293	31803543	17.31	72.82	11.49	intergenic	U2af1
chr17	31956832	31957082	37.31	136.57	36.83	intergenic	Sik1
chr17	31957232	31957482	157.87	475.25	146.13	intergenic	Sik1
chr17	32708753	32709003	36.42	167.61	60.67	intergenic	Cyp4f16
chr17	33082064	33082508	40.78	215.65	19.26	intronic	Cyp4f13
chr17	33927939	33928189	3.73	47.64	8.76	intergenic	Angptl4
chr17	33931328	33931712	39.93	125.35	18.83	intergenic	Angptl4
chr17	34032411	34032661	19.96	56.77	9.81	intergenic	Kifc5b
chr17	34233757	34234007	121.74	286.32	71.79	promoter	AK136114
chr17	34271403	34271653	21.37	188.07	61.68	promoter	H2-DMa
chr17	34991651	34991901	15.19	69.19	20.4	exonic	Rdbp
chr17	36109177	36109427	75.27	213.81	37.2	intergenic	Prr3
chr17	36995138	36995388	27.65	101.37	27.35	exonic	Trim26
chr17	37074960	37075393	73.5	485.28	115.96	intergenic	Rnf39
chr17	43567741	43568145	93.46	370.06	61.57	intronic	Gpr116
chr17	43579167	43579593	133.91	533.84	165.39	intronic	Gpr116
chr17	43579695	43579945	19.28	84.6	25.89	intronic	Gpr116
chr17	43620045	43620736	55.44	480.11	46.77	intronic	Mep1a
chr17	43860193	43860443	20.94	124.87	15.37	intronic	Cyp39a1
chr17	46305568	46305818	58.78	227.98	70.35	exonic	Gtpbp2
chr17	46620871	46621121	101.22	251.68	52.9	exonic	Ttbk1
chr17	46836428	46836678	112.93	349.38	74.15	intronic	Ppp2r5d
chr17	47578439	47578889	114.05	320.38	49.81	intronic	AI661453
chr17	47598282	47598532	16.17	66.86	19.34	intronic	AI661453
chr17	47644213	47644463	32.17	96.47	13.56	intronic	Ccnd3
chr17	48140017	48140267	44.31	109.35	24.23	intergenic	AK043085
chr17	49684871	49685121	36.95	134.9	42.19	intronic	Daam2
chr17	50486504	50486754	46.63	160.72	45.11	intergenic	Dazl
chr17	56201609	56202044	63.2	237.92	38.17	exonic	Chaf1a
chr17	56333810	56334260	122.43	448.78	85.34	exonic	Dpp9
chr17	56480069	56480319	21.6	158.97	19.64	intronic	Kdm4b
chr17	57054438	57055072	55.83	345.56	50.33	intronic	Mllt1
chr17	57110201	57110616	82.21	269.52	69.13	intronic	Acer1
chr17	57124705	57124955	25.52	81.28	19.53	intergenic	Acer1
chr17	57467103	57467353	106.92	284.05	64.95	exonic	Vav1
chr17	63690669	63690919	46.27	246.97	45.23	intronic	Fbxl17
chr17	63692313	63692733	71.97	179.88	33.07	intronic	Fbxl17
chr17	63734587	63734837	17.97	87.45	17.03	intronic	Fbxl17
chr17	71528588	71528838	13.97	68.72	20.94	intergenic	Lpin2
chr17	71538590	71538969	21.57	91.56	30.23	intronic	Lpin2
chr17	75777833	75778083	27.62	136.28	36.97	intronic	Ltbp1
chr17	75789386	75789802	53.38	330.92	75.22	exonic	Ltbp1
chr17	75876550	75876800	55.87	164.65	41.98	intronic	Rasgrp3
chr17	77483664	77483914	14.96	71.09	17.39	intergenic	AK144664
chr17	78678425	78678675	38.32	124.09	26.86	intronic	Crim1
chr17	81207368	81207785	38.32	185.01	29.68	intergenic	Map4k3
chr17	84539752	84540202	117.06	501.79	151.2	promoter	AK040143
chr17	86594772	86595022	86.89	245.46	48.81	intronic	Prkce
chr17	86878642	86879286	75.86	595.03	83.34	intronic	Prkce
chr17	87178470	87178920	59.86	238.69	50.84	intronic	Epas1
chr17	87688507	87688757	13.42	44.03	9.61	intronic	Ttc7
chr17	87757015	87757265	73.53	451.06	161.45	intronic	Ttc7
chr17	87877342	87877790	145.6	351.75	70.08	intergenic	Calm2
chr17	90362339	90362589	28.21	145.57	35.2	intergenic	Nrxn1
chr17	91636470	91636897	145.23	426.97	83.76	intergenic	Nrxn1
chr18	4900965	4901415	54.68	230.59	52.7	intergenic	Svil
chr18	10850733	10851311	108.35	301.24	60	intergenic	Mib1
chr18	11015519	11015769	18.88	85.74	23.42	intergenic	AK033147
chr18	12048646	12048896	55.31	152.86	28.84	intronic	Cables1
chr18	12403460	12403865	57.47	170.37	18.19	intergenic	Ankrd29
chr18	16190583	16190951	18.29	69.82	16.64	intergenic	Chst9
chr18	20898721	20898971	41.69	169.12	54.39	intronic	B4galt6
chr18	20959691	20960113	120.29	343.06	58.97	intergenic	Trappc8
chr18	23875932	23876182	39.27	102.26	22.32	intergenic	Mapre2
chr18	30533285	30533535	27.16	169.2	57.85	intergenic	Pik3c3
chr18	30650553	30650803	13.06	67.04	18.57	intergenic	Pik3c3
chr18	30663887	30664137	14.5	107.79	32.72	intergenic	Pik3c3
chr18	32189791	32190221	58.55	211.94	43.36	intronic	Myo7b
chr18	33060593	33061002	25.04	137.01	21.05	intergenic	Wdr36
chr18	33062129	33062560	63	351.83	47.74	intergenic	Wdr36
chr18	34147370	34147811	85.55	412.22	58.9	intronic	Epb4.1l4a
chr18	34190945	34191195	22.98	70.22	16.41	intergenic	Epb4.1l4a
chr18	35903975	35904225	26.48	96.96	22.83	intergenic	Tmem173
chr18	38197191	38197441	46.44	122.28	19.49	intergenic	Arap3
chr18	38355629	38355879	80.31	257.37	47.09	intronic	Pcdh1
chr18	38366015	38366265	14.04	77.38	22.34	intronic	Pcdh1
chr18	38367631	38367881	156.17	472.88	150.17	intronic	Pcdh1
chr18	39077378	39077821	82.54	297.86	54.81	intronic	Fgf1
chr18	39765171	39765421	12.47	44.64	8.13	intergenic	Nr3c1
chr18	42220909	42221159	22.38	92.36	25.76	intronic	Sh3rf2
chr18	44544976	44545426	49.22	197.19	56.68	intronic	Dcp2
chr18	47608933	47609183	33.77	139.21	29.47	intergenic	9130209A04Rik
chr18	54848459	54848709	61.1	135.71	28.19	intergenic	Zfp608
chr18	55182179	55182429	15.78	48.9	9.92	intronic	AK163160
chr18	56575149	56575399	75.37	165.06	34.79	intronic	Gramd3
chr18	56790857	56791453	37.7	269.89	41.37	intergenic	1700065I17Rik
chr18	56878563	56878813	30.07	117.07	36.94	intronic	Lmnb1
chr18	58459105	58459539	61.72	260.35	54.82	intergenic	Fbn2
chr18	58782836	58783086	29.13	71.47	10.5	intergenic	Slc27a6
chr18	58813053	58813490	71.93	384.19	43.38	intergenic	Isoc1
chr18	60761100	60761550	96.05	406.35	122.02	promoter	Synpo
chr18	61093532	61093782	54.17	187.19	61.73	intronic	Camk2a
chr18	61096772	61097022	46.11	111.23	20.62	intronic	Camk2a
chr18	61098149	61098399	13.55	80.22	19.66	intronic	Camk2a
chr18	61211253	61211703	74.58	353.45	118.24	intronic	Pdgfrb
chr18	61270179	61270629	419.66	898.59	207.16	intronic	Csf1r
chr18	61377725	61378173	58.25	244.73	44.08	promoter	Pde6a
chr18	61453449	61453699	188.76	442.87	104.99	intergenic	Pde6a
chr18	61465180	61465430	41.92	99.35	17.23	intronic	Ppargc1b
chr18	61479143	61479393	23.92	77.92	20.34	intronic	Ppargc1b
chr18	61516328	61516778	64.08	257.36	67.14	intronic	Ppargc1b
chr18	63087029	63087460	59.73	237.42	34.61	intronic	Apcdd1
chr18	64727402	64727652	146.54	353.69	79.33	intronic	Atp8b1
chr18	64777629	64777879	13.55	67.27	21.47	intronic	Atp8b1
chr18	65055250	65055500	24.71	58.67	8.82	intronic	Nedd4l
chr18	65222691	65222941	14.04	45.89	8.71	intronic	Nedd4l
chr18	65242519	65242769	53.34	184.82	55.13	intronic	Nedd4l
chr18	65261848	65262298	64.54	175.69	32.93	intronic	Nedd4l
chr18	65328802	65329239	66.14	228.62	47.64	exonic	Nedd4l
chr18	65329363	65329613	118.86	288.38	64.72	exonic	Nedd4l
chr18	65443832	65444279	145.86	589.35	181.15	intronic	Alpk2
chr18	65760688	65760938	66.21	140.34	28.15	intronic	Zfp532
chr18	66649948	66650198	42.94	179.62	30.28	intergenic	AK033454
chr18	67486415	67486665	16.89	107.01	41.87	intronic	B430212C06Rik
chr18	67573066	67573497	150.41	450.5	96.82	intronic	Afg3l2
chr18	68105244	68105667	245.86	561.83	115.13	intronic	D18Ertd653e
chr18	69591618	69592035	22.09	84.26	17.23	intronic	Tcf4
chr18	73693276	73693708	28.77	140.45	35.07	intergenic	Mex3c
chr18	73696084	73696334	87.41	193.73	39.45	intergenic	Mex3c
chr18	74173937	74174587	181.34	755.45	90.08	intronic	Mapk4
chr18	74194143	74194393	64.11	219.54	28.02	intronic	Mapk4
chr18	74616474	74616724	47.91	219.48	68.56	intronic	Myo5b
chr18	74620856	74621106	133.94	363.79	83.84	intronic	Myo5b
chr18	75533875	75534125	74.81	237.29	71.87	intronic	Smad7
chr18	75535075	75535525	194.29	536.6	121.57	intronic	Smad7
chr18	78352224	78352474	36.42	145.6	32.01	exonic	Slc14a2
chr18	78677527	78677777	36.55	123.15	26.12	intronic	Slc14a2
chr18	81518432	81518682	34.53	184.1	60.65	intergenic	Sall3
chr18	81518796	81519046	39.3	205.8	78.91	intergenic	Sall3
chr18	83100048	83100298	31.09	94.61	17.11	intronic	Zfp516
chr18	84254081	84254331	32.89	123.45	36.71	intronic	Tshz1
chr18	84575455	84575705	35.25	126.36	18.15	intronic	Zfp407
chr18	88287169	88287419	10.21	168.24	39.43	intergenic	Socs6
chr19	3266315	3266565	34.46	89.49	19.54	exonic	Ighmbp2
chr19	3919617	3919867	8.05	34.79	7.23	intronic	Aldh3b1
chr19	4002620	4002870	70.07	208.05	58.6	promoter	Doc2g
chr19	4114324	4114774	129.92	489.07	115.94	exonic	Aip
chr19	4162112	4162362	11.78	43.15	9.36	exonic	Rps6kb2
chr19	4208560	4209004	51.48	290.78	37.19	intergenic	Clcf1
chr19	4221099	4221349	42.61	130.96	34.85	exonic	Clcf1
chr19	4600749	4601154	18.49	80.06	17.51	intronic	Pcx
chr19	5065185	5065435	22.84	111.14	20.13	intergenic	Cd248
chr19	5429894	5430344	94.94	249.55	56.25	intergenic	AI837181
chr19	5724302	5724552	48.83	178.89	42.17	intronic	Ehbp1l1
chr19	5921748	5922198	152.7	580.94	148.71	intronic	Cdc42ep2
chr19	6020451	6020701	84.2	209.52	38.95	intergenic	AK160921
chr19	6022250	6022500	40.55	113.98	21.65	intergenic	AK160921
chr19	6026620	6027184	46.64	198.91	23.1	intergenic	AK160921
chr19	6039217	6039711	13.58	100.78	12.72	intergenic	Syvn1
chr19	6088956	6089206	30.66	133.95	24.71	intronic	Cdca5
chr19	6104468	6104918	220.9	668.42	166.17	promoter	Naaladl1
chr19	6112795	6113045	20.49	78.51	19.56	exonic	Naaladl1
chr19	6297492	6298136	157.4	724.59	211.62	exonic	Ehd1
chr19	6671361	6671611	65.36	187.24	50.69	intergenic	Nrxn2
chr19	6680614	6680864	38.03	92.87	19.39	intergenic	Nrxn2
chr19	6994404	6994654	83.87	233.43	47.17	exonic	Esrra
chr19	7038799	7039249	55.99	160.81	39.27	exonic	Plcb3
chr19	7039799	7040049	29.65	77.68	16.87	exonic	Plcb3
chr19	7267041	7267491	135.55	354.1	71.3	intronic	Macrod1
chr19	7441371	7441715	18.66	54.58	10.88	intronic	AI846148
chr19	8773517	8774115	54.88	261.55	35.68	intergenic	Slc3a2
chr19	9059124	9059374	45.29	202.35	66.41	intergenic	Ahnak
chr19	10127932	10128182	19.41	59.33	9.54	intronic	Fads3
chr19	10438529	10438779	158.78	392.17	94.52	intergenic	Syt7
chr19	10454449	10454899	33.41	201.94	46.6	intergenic	Syt7
chr19	10642040	10642471	82.99	253.14	44.36	intergenic	Tmem138
chr19	12106610	12106974	28.28	118.8	25.53	intergenic	Olfr1423
chr19	17477799	17478049	76.84	214.09	59.98	intergenic	Rfk
chr19	17511100	17511750	99.62	329.42	60.31	exonic	Pcsk5
chr19	18836119	18836369	82.27	209.3	37.05	intronic	Trpm6
chr19	18905699	18905949	67.28	205.07	44.77	intronic	Trpm6
chr19	21411738	21412188	151.06	533.08	152.9	intergenic	Gda
chr19	23114836	23115086	22.02	58	10.11	intergenic	BC044868
chr19	23772583	23772833	46.14	201.17	36.82	intronic	Ptar1
chr19	24030129	24030379	80.83	218.51	47.39	intergenic	Apba1
chr19	24705794	24706222	64.34	271.52	51.21	intergenic	E030010A14Rik
chr19	25690527	25690777	22.65	91.34	15.01	intronic	Dmrt3
chr19	27399980	27400430	123.8	562.57	173.88	intronic	Kcnv2
chr19	32145587	32146028	68.43	194.99	29.07	intronic	Asah2
chr19	32198692	32199122	88.72	264.3	50.07	exonic	Sgms1
chr19	32228046	32228296	47.13	128.27	19.7	intronic	Sgms1
chr19	32299120	32299370	20.03	72.46	20.55	intronic	Sgms1
chr19	32299720	32300370	62.84	446.19	83.6	intronic	Sgms1
chr19	33024943	33025193	34.56	103.67	26.66	intergenic	Pten
chr19	33063830	33064254	36.62	212.23	43.47	intergenic	Rnls
chr19	33145668	33146116	42.42	233.19	47.22	intergenic	Rnls
chr19	33146658	33147304	199.88	604.05	96.32	intergenic	Rnls
chr19	33340886	33341267	27.59	151.52	54.45	intronic	Rnls
chr19	38550454	38550704	24.35	67.94	14.21	intergenic	Plce1
chr19	40341670	40341920	43.76	243.28	73.82	intronic	Pdlim1
chr19	40356357	40356923	45.16	293.85	44.67	intergenic	Sorbs1
chr19	42128756	42129006	53.87	168.76	43.17	intronic	Hoga1
chr19	42152720	42153170	42.28	150.8	26.4	exonic	Morn4
chr19	42173863	42174262	43.1	216.68	46.47	intronic	Pi4k2a
chr19	42343038	42343288	148.34	414.31	78.86	exonic	Golga7b
chr19	42376420	42377070	111.11	684.19	115.87	exonic	Crtac1
chr19	42526972	42527403	31.45	190.49	40.17	intergenic	Crtac1
chr19	44029874	44030124	34.33	107.27	10.02	intergenic	Cpn1
chr19	44043040	44043290	39.01	139.22	44.02	promoter	Cpn1
chr19	44496503	44496753	43.69	110.69	22.41	intergenic	Scd1
chr19	44783860	44784110	56.25	136.97	24.58	intergenic	Pax2
chr19	44846286	44846536	111.17	306.64	61.33	intronic	Pax2
chr19	45284547	45284797	75.05	281.24	66.27	intergenic	Lbx1
chr19	46540561	46541011	51.28	205.67	53.27	intronic	Sufu
chr19	47431875	47432125	82.08	225.05	42.76	intronic	Sh3pxd2a
chr19	47729304	47729754	177.18	853.48	244.62	exonic	Col17a1
chr19	48678257	48678507	11.65	63.15	20.1	exonic	Sorcs3
chr19	48717835	48718085	13.97	73.51	20.82	intronic	Sorcs3
chr19	48747508	48747758	6.51	68.54	9.16	intronic	Sorcs3
chr19	48770616	48770992	15.15	78.39	21.42	intronic	Sorcs3
chr19	48773603	48774010	18.43	108.3	36.7	intronic	Sorcs3
chr19	48778269	48778711	25.63	162.09	34.05	exonic	Sorcs3
chr19	48780985	48781235	26.7	86.69	20.34	intronic	Sorcs3
chr19	48781327	48781748	20.49	186.34	20.25	intronic	Sorcs3
chr19	48946134	48946384	24.58	203.19	49.25	intergenic	Sorcs3
chr19	48956432	48956682	19.86	101.37	29.51	intergenic	Sorcs3
chr19	48957145	48957574	13.81	80.5	18.03	intergenic	Sorcs3
chr19	51551514	51551935	35.77	202.44	52.96	intergenic	AB352701
chr19	53097635	53098085	161	524.25	151.69	intronic	Xpnpep1
chr19	53099035	53099485	20.45	120.83	27.24	intronic	Xpnpep1
chr19	53163714	53163964	83.98	218.57	45.32	intergenic	AK018858
chr19	53853943	53854381	79.78	366.46	38.7	intronic	Rbm20
chr19	55210357	55210607	20.68	60.54	13.45	intergenic	Gpam
chr19	55537588	55537838	37.47	187.78	38.96	intronic	Vti1a
chr19	55578423	55578673	25.76	130.68	34.74	intronic	Vti1a
chr19	58903586	58903836	28.28	105.42	31.83	intronic	Hspa12a
chr19	58938911	58939161	55.08	149.2	29.27	intronic	Hspa12a
chr19	58948212	58948462	27.52	67.64	9.42	intronic	Hspa12a
chr19	58996738	58996988	37.7	125.59	28.22	intronic	Hspa12a
chr19	59560091	59560341	141.11	319.63	75.19	intergenic	Emx2
chr19	59584627	59584877	28.7	157.87	27.76	intergenic	Emx2
chr19	59587924	59588174	28.7	91.42	11.26	intergenic	Emx2
chr19	59596798	59597048	39.86	106.73	21.54	intergenic	Emx2
chr2	4178641	4178891	13.48	51.05	13.01	intronic	Frmd4a
chr2	4658808	4659258	35.35	126.47	16.16	intronic	Bend7
chr2	5690716	5690966	34.49	183.88	41.63	intergenic	Cdc123
chr2	6004818	6005068	85.67	429.59	138.83	intergenic	5430407P10Rik
chr2	11347287	11347537	94.05	230.77	53.48	intergenic	Pfkfb3
chr2	13294579	13294829	69.12	186.64	33.3	intronic	Cubn
chr2	15058222	15058662	49.94	180.38	56.46	intergenic	Arl5b
chr2	15212456	15212881	61.42	217.75	43.33	intergenic	Arl5b
chr2	22052996	22053246	74.84	187.12	42.66	intergenic	Myo3a
chr2	24293836	24294086	15.22	71.63	23.88	intronic	Pax8
chr2	24370573	24370997	29.65	141.53	13.54	intergenic	Pax8
chr2	25063513	25063763	7.56	61.18	4.4	intronic	Cobra1
chr2	25091049	25091499	22.78	137.06	22.04	promoter	Slc34a3
chr2	25107587	25107837	11.32	44.27	11.35	intronic	Ndor1
chr2	25417927	25418569	248.12	707.08	172.55	intergenic	Mamdc4
chr2	25424096	25424546	178.58	438	105.06	exonic	Mamdc4
chr2	26216326	26216776	99.46	445.62	93.89	promoter	Card9
chr2	26349494	26349744	23.66	148.6	48.6	intronic	Notch1
chr2	26399392	26399642	71.34	228.78	50.61	intergenic	Egfl7
chr2	26449045	26449495	93.27	411.24	118.81	exonic	Agpat2
chr2	26456444	26456694	38.74	136.39	34.62	intronic	Agpat2
chr2	26476730	26477180	188.64	614.61	164.51	intergenic	Fam69b
chr2	26477730	26477980	13.29	68.52	18.17	intergenic	Fam69b
chr2	27220970	27221220	38.65	152.09	26.92	intronic	Vav2
chr2	27230823	27231273	83.72	255.06	67.55	intronic	Vav2
chr2	27258456	27258706	17.28	58.71	7.43	intronic	Vav2
chr2	27259622	27259872	62.54	186.24	47.67	intronic	Vav2
chr2	27510430	27510680	25.92	76.71	19.12	intergenic	Rxra
chr2	28371479	28371729	40.61	197.47	69.28	intronic	Ralgds
chr2	28379976	28380226	5.4	36.94	6.55	intronic	Ralgds
chr2	28396740	28396990	10.8	27.23	2.84	intronic	Ralgds
chr2	29325325	29325575	65.36	201.29	58.75	intronic	Med27
chr2	29427454	29427818	29.26	70.74	13	intergenic	Med27
chr2	29652159	29652409	16.72	50.71	8.73	exonic	Coq4
chr2	30216734	30217177	58.32	167.53	30.86	promoter	Sh3glb2
chr2	31936403	31936653	263.48	580.57	131.75	intronic	Fam78a
chr2	32180947	32181197	47.26	154.75	39.87	intronic	Dnm1
chr2	32386143	32386579	81.71	272.42	68.46	intergenic	Fam102a
chr2	32402900	32403350	194.19	581.83	98.68	intronic	Fam102a
chr2	32614116	32614366	107.73	308.47	80.07	intronic	Tor2a
chr2	32839465	32839715	67.41	167.91	33.46	promoter	Slc2a8
chr2	35253955	35254205	30.83	117.23	36.3	promoter	4930402F06Rik
chr2	35355473	35355723	9.1	117.93	31.39	intergenic	Ggta1
chr2	35513915	35514165	132.35	406.84	129.54	intronic	Dab2ip
chr2	35747343	35747593	33.55	75.02	13.15	intronic	Ttll11
chr2	36068413	36068663	45.75	119.12	23.04	exonic	AK142949
chr2	38188111	38188361	16.72	62.39	13.1	intergenic	Lhx2
chr2	38322071	38322321	58.94	157.24	34.49	intergenic	AK163151
chr2	38372075	38372508	40.19	220.52	44.62	intronic	Nek6
chr2	50833415	50834049	125.05	436.48	86.13	intergenic	Gm13498
chr2	57079820	57080070	35.84	124.51	39.57	intergenic	AK044432
chr2	58013884	58014300	48.6	211.63	48.29	promoter	Cytip
chr2	58033162	58033528	38.03	126.37	16.56	intronic	Cytip
chr2	59022862	59023112	43.53	117.85	16.56	intronic	Pkp4
chr2	62234987	62235237	41.76	158.37	53.71	intronic	Dpp4
chr2	62236606	62236856	46.44	120.55	26.18	intronic	Dpp4
chr2	65952826	65953076	28.21	174.13	63.62	intronic	Galnt3
chr2	68671247	68671666	58.94	154.42	30.8	intergenic	Lass6
chr2	68740703	68740953	80.18	359.28	65.69	intronic	Lass6
chr2	71628885	71629255	23.5	74.03	14.23	intronic	Itga6
chr2	71908420	71908670	34.23	187.59	36.49	intronic	Rapgef4
chr2	72094345	72094595	11.98	57.66	13.34	exonic	Rapgef4
chr2	72383552	72384166	168.21	701.13	190.29	intergenic	Cdca7
chr2	72453217	72453667	115.69	587.07	105.74	intergenic	Cdca7
chr2	72588528	72588778	18.55	65.9	16.46	intronic	AK018302
chr2	73967970	73968220	34.1	101.32	27.4	intergenic	AK041976
chr2	73976666	73977115	107.68	312.2	48.54	intergenic	AK041976
chr2	74576822	74577072	89.12	415.14	100.24	intronic	Hoxd3
chr2	74848642	74849092	137.22	356.38	94.33	intergenic	Mtx2
chr2	76232303	76232903	86.92	566.76	170.44	intergenic	Rbm45
chr2	76461723	76462173	33.38	107.67	18.93	intergenic	Prkra
chr2	77036281	77036791	44.87	156.16	24.62	exonic	Sestd1
chr2	78515626	78516068	22.06	131.54	20.87	intergenic	Ube2e3
chr2	79242762	79243012	15.78	46.8	9.44	intronic	Cerkl
chr2	79368611	79368861	28.37	180.35	68.2	intergenic	Neurod1
chr2	79416993	79417243	11.91	56.85	13.48	intergenic	Ssfa2
chr2	83861384	83861634	17.8	84.47	26.74	intergenic	Gm13695
chr2	90400915	90401165	31.22	87.34	16.42	intronic	Ptprj
chr2	91032329	91032579	14.14	47.56	8.73	intronic	Nr1h3
chr2	91305978	91306228	53.67	171.78	28.86	intronic	Lrp4
chr2	91316766	91317216	100.14	340.8	59.77	exonic	Lrp4
chr2	91501182	91501432	28.54	81.12	12.05	intronic	Arhgap1
chr2	91502782	91503032	6.51	33.21	7.28	intronic	Arhgap1
chr2	91506804	91507254	58.88	344.33	63.5	intronic	Arhgap1
chr2	91510338	91510588	71.51	172.04	37.43	exonic	Arhgap1
chr2	91767556	91767806	31.22	136.89	38.49	exonic	Chrm4
chr2	91774956	91775406	69.25	247.98	41.73	exonic	Dgkz
chr2	91787900	91788350	193.37	626.9	202.34	promoter	Dgkz
chr2	91798863	91799113	56.42	138.84	29.35	intronic	Dgkz
chr2	93283637	93283887	16.53	67.02	17.74	intronic	Cd82
chr2	93287037	93287487	87.28	350.42	67.61	intronic	Cd82
chr2	93296774	93297224	44.05	218.16	45.84	intronic	Cd82
chr2	101503541	101503791	57.33	189.99	58.17	intergenic	B230118H07Rik
chr2	105064276	105064526	171.51	415.45	85.53	promoter	0610012H03Rik
chr2	110038485	110039057	53.41	213.9	19.57	intergenic	Bbox1
chr2	112082458	112082708	33.25	136.84	23.07	promoter	Mboat2
chr2	112083458	112083708	35.25	142.65	30.2	intronic	Mboat2
chr2	115743905	115744155	33.64	92.75	16.38	intronic	Meis2
chr2	116944259	116944642	30.63	84.68	16.37	intergenic	Spred1
chr2	118988534	118989279	64.27	248.4	31.52	intergenic	Gchfr
chr2	119070344	119070594	44.41	158.26	41.07	intronic	Spint1
chr2	119988944	119989194	26.38	69.25	13.99	intergenic	Pla2g4e
chr2	120079716	120079966	28.67	132.46	24.72	intergenic	Pla2g4e
chr2	122104885	122105335	43.13	242.83	79.06	intergenic	Duox2
chr2	122544891	122545517	36.88	205.71	24.15	exonic	AK166060
chr2	124429187	124429437	30.76	102.54	20.23	intronic	Sema6d
chr2	127628115	127628539	46.44	129.66	24.8	intronic	Bub1
chr2	131022231	131022648	33.61	154.78	31.21	intronic	Cdc25b
chr2	131047940	131048190	149.89	388.49	78.78	intergenic	2310035K24Rik
chr2	132460113	132460550	37.11	142.52	35.98	intronic	AU019990
chr2	133265425	133265818	34.92	107.74	20.33	intronic	AK040035
chr2	133327689	133328139	31.45	137.06	27.98	intergenic	AK040035
chr2	133488284	133488708	38.36	196.79	33.13	intergenic	Bmp2
chr2	133545404	133545816	109.92	280.6	53.68	intergenic	Bmp2
chr2	135248497	135248747	15.71	95.72	19.02	intronic	Plcb1
chr2	136616978	136617228	18.46	78.65	22.5	intergenic	Snap25
chr2	142533333	142533783	84.69	323.21	39.44	intronic	Kif16b
chr2	142706922	142707372	39.01	162.85	56.9	intronic	Kif16b
chr2	142719647	142719897	102.13	386.33	95.28	intronic	Kif16b
chr2	143671833	143672083	102.43	305.93	84.47	intronic	Bfsp1
chr2	143676938	143677188	14.63	60.57	17.31	intronic	Bfsp1
chr2	143691172	143691612	30.31	105.48	24.86	intergenic	Bfsp1
chr2	143919535	143919979	63.55	185.84	45.18	intergenic	Banf2
chr2	143999435	143999868	51.44	390.42	108.42	intergenic	Snx5
chr2	144011679	144011929	52.43	136.74	25.65	intergenic	Snx5
chr2	145634562	145634812	70.85	207.48	51.75	intronic	Rin2
chr2	145666248	145666498	42.21	97.94	18.56	intronic	Rin2
chr2	145982677	145983127	52.26	204.04	59.63	intronic	RP23-125A1.2
chr2	146366496	146366746	14.53	52.85	7.35	intergenic	Ralgapa2
chr2	150048667	150048917	43.98	101.34	19.81	intronic	Zfp937
chr2	150490812	150491262	83.51	280.49	63.28	intronic	Acss1
chr2	150720153	150720403	33.41	163.43	40.28	intronic	Abhd12
chr2	151769042	151769492	83.42	342.83	75.27	exonic	Angpt4
chr2	151828101	151828751	109.08	338.28	60.88	intronic	2310046K01Rik
chr2	151835789	151836039	107.34	330.34	57.72	intergenic	2310046K01Rik
chr2	151921955	151922205	20.03	58.15	11.47	intergenic	Scrt2
chr2	152164718	152164968	20.75	66.79	10.37	intronic	Trib3
chr2	153063028	153063278	19.93	83.02	20.19	intronic	Plagl2
chr2	153113584	153113834	54.91	176.06	43.37	intergenic	Kif3b
chr2	153431900	153432510	103.84	432.89	58.44	intergenic	Commd7
chr2	154458782	154459227	74.39	212.86	31.96	intronic	Zfp341
chr2	154474638	154475066	37.47	110.06	23.69	intergenic	Zfp341
chr2	155191398	155191794	63.62	221.05	62.22	intergenic	Pigu
chr2	155658746	155658996	56.55	211.03	50.05	intronic	Fam83c
chr2	155857657	155858107	38.78	169.3	27.46	promoter	Fer1l4
chr2	156279859	156280109	105.15	414.41	92.04	intronic	Epb4.1l1
chr2	158000313	158000563	99.65	228.59	46.93	intergenic	D630003M21Rik
chr2	158227999	158228249	30.57	147.3	55.03	intergenic	Ralgapb
chr2	160166870	160167289	42.48	143.22	21.63	intergenic	Gm826
chr2	160184055	160184505	76.97	280.41	30.23	intergenic	Mafb
chr2	160466112	160466552	76.45	267.09	77.72	intergenic	Top1
chr2	160716427	160716677	46.93	134.97	20.82	intronic	Lpin3
chr2	161419155	161419405	33.35	123.37	39.35	intronic	Ptprt
chr2	161419752	161420002	35.57	177	43.12	intronic	Ptprt
chr2	163366582	163366832	48.63	115.92	22.79	intronic	Hnf4a
chr2	163408286	163408689	31.68	112.47	19.47	intergenic	Hnf4a
chr2	164259107	164259357	20.52	79.22	20.8	intronic	Sdc4
chr2	164261307	164261557	35.41	150.11	47.73	intronic	Sdc4
chr2	164295176	164295426	65.22	164.29	29.85	intronic	Sys1
chr2	164868461	164868711	39.08	138.55	36.99	intergenic	Ncoa5
chr2	166424174	166424824	92.71	497.46	81.91	intronic	Prex1
chr2	167240808	167241058	39.44	89.76	17.44	intergenic	Slc9a8
chr2	167494807	167495257	9.72	99.19	19.44	intronic	Tmem189
chr2	167611615	167611981	18.1	101.67	29.29	intergenic	A530013C23Rik
chr2	167636818	167637068	31.94	99.71	17.17	intergenic	A530013C23Rik
chr2	167642743	167643393	251.24	921.54	288.9	intergenic	Ptpn1
chr2	167912417	167912867	84.46	330.79	108.61	intronic	Pard6b
chr2	169585924	169586174	20.85	142.17	35.33	intronic	Tshz2
chr2	169590473	169590723	25.43	141.11	27.74	intronic	Tshz2
chr2	171550490	171550740	28.24	128.24	44.34	intergenic	AK133337
chr2	171556805	171557055	23.07	131.7	46.59	intergenic	AK133337
chr2	171618193	171618443	20.85	182.21	39.55	intergenic	AK133337
chr2	171682144	171682394	16.62	88.93	23.59	intergenic	AK133337
chr2	172039070	172039520	120.82	623.01	80.96	intergenic	Mc3r
chr2	172042108	172042358	51.54	199.31	38.8	intergenic	Mc3r
chr2	172666414	172666840	50.6	195.8	33.89	intergenic	BC116387
chr2	172667118	172667368	13.09	56.27	15.99	intergenic	BC116387
chr2	172753113	172753363	38.32	186.68	37.39	intronic	Bmp7
chr2	172756716	172756966	24.81	212.07	44.23	intronic	Bmp7
chr2	172857432	172857882	141.9	410.92	90.07	intronic	Rbm38
chr2	173207842	173208284	110.88	589.78	159.07	intergenic	AK018940
chr2	174575922	174576172	43.92	159.53	33.57	intergenic	Edn3
chr2	174584656	174584906	46.34	111.39	21.84	promoter	Edn3
chr2	178337881	178338131	23.6	88.09	25.9	intergenic	Cdh26
chr2	180063904	180064154	27.62	84.71	15.85	intronic	Gata5
chr2	180070148	180070598	123.64	304.78	57.11	promoter	Gata5
chr2	180071348	180071798	45.39	155.77	44.23	promoter	Gata5
chr2	180705642	180705892	16.82	56.52	12.84	intronic	Arfgap1
chr2	181685260	181685510	20.78	113.14	19.12	intergenic	Polr3k
chr3	9916650	9916900	41.76	107.08	22.96	intergenic	Pag1
chr3	19559888	19560138	30.6	78.92	10.75	intronic	Trim55
chr3	21978456	21978706	53.77	180.18	55	intronic	Tbl1xr1
chr3	28462514	28462764	38.19	103.99	25.83	intronic	Tnik
chr3	28617409	28617830	26.74	128.09	32.1	exonic	Slc2a2
chr3	30880200	30880641	33.09	106.87	21.74	intergenic	Phc3
chr3	32279916	32280352	46.9	232.3	26.19	intergenic	4930429B21Rik
chr3	37605600	37605850	9.69	98.04	25.21	intergenic	Gm5148
chr3	40408928	40409576	101.91	316.06	47.56	intergenic	Intu
chr3	41092111	41092361	43.3	114.03	27.31	exonic	AY512943
chr3	51026790	51027238	85.12	238.75	60.52	promoter	Ccrn4l
chr3	51633272	51633522	38.95	150.06	50.9	intronic	Maml3
chr3	52469170	52469604	79.1	540.97	154.75	intergenic	AK040707
chr3	52559187	52559437	46.27	288.42	111.75	intronic	AK040707
chr3	54487172	54487422	20.42	92.53	16.91	intergenic	Fam48a
chr3	54891920	54892370	76.15	217.02	43.63	intergenic	Spg20
chr3	55750014	55750458	65.82	151.37	27.32	intronic	Nbea
chr3	55753826	55754376	73.28	390.24	43.65	intronic	Nbea
chr3	57931107	57931357	8.15	51.45	8.52	intergenic	AK005707
chr3	60686275	60686525	8.54	51.19	13.01	intergenic	Ube2v1
chr3	61155334	61155584	8.18	57.21	9.28	intergenic	Rap2b
chr3	79857302	79857940	55.5	302.14	39.7	intergenic	Fam198b
chr3	79858272	79858716	27.95	91.92	20.32	intergenic	Fam198b
chr3	82990414	82990664	17.9	95.59	13.24	intergenic	Plrg1
chr3	84065764	84066014	11.81	65.73	17.01	intronic	Trim2
chr3	84216772	84217222	204.4	651.66	147.23	intergenic	Fhdc1
chr3	84243960	84244210	39.27	111.07	28.09	intergenic	Fhdc1
chr3	84274256	84274679	54.78	167.15	25.51	intronic	Fhdc1
chr3	84274948	84275198	44.77	115.56	21.75	intronic	Fhdc1
chr3	85199103	85199353	36.26	197.52	67.64	intronic	Arfip1
chr3	85248133	85248528	35.97	158.62	45.08	intronic	Arfip1
chr3	85497773	85498415	161.27	526.78	138.96	intronic	Fam160a1
chr3	87314142	87314392	37.34	118.36	28.9	intergenic	Fcrl5
chr3	88220001	88220251	35.9	81.42	14.53	exonic	Slc25a44
chr3	88977013	88977263	13.09	52.1	7.79	exonic	Clk2
chr3	89058695	89059100	147.49	341.31	74.72	intergenic	Krtcap2
chr3	89131370	89131620	62.34	264.43	87.34	intergenic	Efna3
chr3	89191024	89191474	137.25	431.11	118.36	exonic	Zbtb7b
chr3	89197824	89198074	32.17	143.97	46.55	promoter	AK136654
chr3	89570043	89570293	11.98	60.57	10.45	promoter	Chrnb2
chr3	89584644	89584894	45.39	175.23	45.9	exonic	Ube2q1
chr3	90179459	90179909	65.98	328.54	84.83	intergenic	Slc27a3
chr3	92296309	92296559	31.09	100.87	26.95	intergenic	Sprr1a
chr3	92392853	92393103	43.27	129.8	32.58	promoter	Smcp
chr3	92790638	92791052	76.74	275.75	79.17	intergenic	Lce3f
chr3	94469504	94469754	27.59	101.93	25.96	intronic	BC021767
chr3	94946123	94946373	129.65	410.53	100.46	promoter	Tnfaip8l2
chr3	95080335	95080785	37.34	154.91	56.01	intronic	Prune
chr3	95081135	95081585	70	441.1	138.05	intronic	Prune
chr3	95440199	95440449	60.25	189.05	52.69	intergenic	Ensa
chr3	96627673	96627923	146.18	437.15	106.11	intronic	Cd160
chr3	96636186	96636436	58.84	150.17	32.54	promoter	Pdzk1
chr3	101310766	101311016	134.93	316.37	76.25	intergenic	Igsf3
chr3	104216476	104216726	100.4	285.19	61.03	intergenic	Lrig2
chr3	107677738	107677988	53.83	169.48	40.57	intergenic	Eps8l3
chr3	107678338	107678588	48.89	208.55	73.82	promoter	Eps8l3
chr3	107727699	107728549	19.11	292.34	25.75	intergenic	Gstm7
chr3	108647505	108647909	78.96	356.84	77.77	intergenic	Stxbp3a
chr3	108682029	108682466	105.9	470.64	115.64	intronic	Fndc7
chr3	108721797	108722047	67.71	175	46.1	intergenic	Prpf38b
chr3	108808729	108808979	61.39	306.19	63.02	intronic	Fam102b
chr3	119404973	119405223	71.96	212.3	51.62	intergenic	Ptbp2
chr3	121546541	121546791	10.9	50.78	14.94	intergenic	Abcd3
chr3	121863316	121863736	26.77	151.9	26.83	intronic	Abca4
chr3	122124696	122125146	45.26	167.97	30.94	intronic	Bcar3
chr3	122178820	122179070	22.68	94.93	30.48	intronic	Bcar3
chr3	122200811	122201061	65.42	189.32	39.25	intronic	Bcar3
chr3	122587311	122587561	16	63.95	17.21	intronic	AK016661
chr3	122781108	122781820	46.83	243.37	27.49	exonic	Synpo2
chr3	127151925	127152551	55.7	303.63	42.68	intronic	Ank2
chr3	128923799	128924049	102.17	243.56	54.7	intergenic	Pitx2
chr3	129056219	129056607	32.89	120.06	29.59	intergenic	Enpep
chr3	129058423	129058868	18.29	126.23	16.22	intergenic	Enpep
chr3	129186114	129186764	86.33	499.31	119.92	intergenic	AK139614
chr3	131021145	131021395	45.95	141.59	39.19	intergenic	Sgms2
chr3	131045212	131045462	38.45	122.19	32.37	intronic	Sgms2
chr3	131179794	131180044	40.06	154.2	47.34	intergenic	Papss1
chr3	131224393	131224819	73.53	163.6	32.97	intergenic	Papss1
chr3	133696808	133697386	73.8	391.53	107.42	intronic	AK034519
chr3	133767647	133767897	52.43	143.13	21.34	intronic	AK034519
chr3	133768047	133768497	99.88	291.19	72.82	intronic	AK034519
chr3	133802077	133802327	12.4	107.06	13.03	intronic	AK034519
chr3	133874087	133874337	33.94	136.06	45.81	intronic	AK034519
chr3	133885206	133885456	18.85	172.84	25.59	intronic	AK034519
chr3	135859381	135859769	31.16	80.55	18.64	intronic	Bank1
chr3	136337423	136337850	67.87	176.42	31.31	intronic	Ppp3ca
chr3	136612641	136613185	59.1	181.61	41.95	intergenic	Ppp3ca
chr3	136767177	136767795	51.25	292.58	45.46	intergenic	Ppp3ca
chr3	142229065	142229315	12.47	55.21	7.98	intronic	Gbp5
chr3	143000896	143001146	32.43	74.37	12.1	intergenic	AK043679
chr3	143003019	143003458	35.02	139.85	25.16	intergenic	AK043679
chr3	143318421	143319049	72.45	260.81	29.84	intergenic	AK043613
chr3	143322508	143322941	94.51	239.48	50.98	intergenic	AK043613
chr3	144678544	144678794	76.64	195.94	35.39	exonic	Clca3
chr3	145462645	145463088	46.28	163.86	25.18	intronic	Ddah1
chr3	151789995	151790419	36.49	267	38.78	intronic	Gipc2
chr3	154739120	154739370	6.87	58.77	16.02	intergenic	Fpgt
chr3	157593910	157594452	21.73	167.86	26.12	intergenic	Cth
chr3	157597511	157597876	20.52	86.94	12.29	intergenic	Cth
chr4	3793348	3793598	33.77	153.99	54.98	intergenic	Mos
chr4	5547140	5547770	120.99	538.68	143.77	intergenic	AK015191
chr4	6619390	6619833	115.13	402.13	64.32	intronic	Tox
chr4	9955945	9956347	27.07	92.55	20.52	intergenic	4930448K20Rik
chr4	10840141	10840591	85.22	521.75	115.12	intergenic	2610301B20Rik
chr4	10856880	10857130	89.93	238.51	49.73	intergenic	2610301B20Rik
chr4	17581977	17582227	15.25	49.99	11.95	intergenic	Mmp16
chr4	17594572	17594822	64.54	182.19	35.4	intergenic	Mmp16
chr4	32626155	32626405	74.05	217.38	56.6	intronic	Bach2
chr4	33329591	33329841	55.7	209.72	68.7	intergenic	Pnrc1
chr4	35006114	35006563	42.42	210.36	36.93	intronic	Mobkl2b
chr4	35038540	35038790	17.21	64.96	15.11	intronic	Mobkl2b
chr4	35873535	35873785	26.9	89.12	18.86	intronic	Lingo2
chr4	40726954	40727204	48.66	114.7	21.33	intergenic	Smu1
chr4	40730053	40730498	29.16	227.76	21.05	intergenic	B4galt1
chr4	40758400	40758650	32.79	91.38	15.84	intronic	B4galt1
chr4	40963903	40964153	70.03	206.32	34.47	intronic	Nfx1
chr4	40989994	40990428	60.51	236.52	81.83	intronic	Aqp7
chr4	43981562	43981987	39.89	168.45	38.68	intronic	Glipr2
chr4	44196781	44197031	14.79	102.53	28	intergenic	Rnf38
chr4	45442449	45442699	37.93	137.46	15.24	intronic	Shb
chr4	45510262	45510512	40.15	192.33	65.71	intronic	Shb
chr4	45518201	45518451	31.15	81.48	17.39	intronic	Shb
chr4	45537530	45537921	32.1	162.12	50.34	intronic	Shb
chr4	45810874	45811314	20.91	153.74	23.86	promoter	Aldh1b1
chr4	45971019	45971269	11.88	43.14	8.04	intergenic	Tdrd7
chr4	46511326	46511776	34.63	127.44	34.34	intronic	Trim14
chr4	46560037	46560487	35.02	103.26	17.11	intronic	Coro2a
chr4	46581448	46581698	28.99	174.03	60.54	intronic	Coro2a
chr4	46584711	46584961	46.21	136.58	17.73	intronic	Coro2a
chr4	46613296	46613546	29.19	135.82	30.48	intronic	Coro2a
chr4	47303714	47303964	25.2	89.37	24.43	intronic	Col15a1
chr4	53319948	53320398	24.87	160.55	38.13	intergenic	AI427809
chr4	53352115	53352365	70.49	200.33	51.96	intergenic	AI427809
chr4	53372865	53373515	144.2	574.66	212.7	intergenic	Slc44a1
chr4	55451619	55451869	12.08	58.43	16.48	intergenic	Rad23b
chr4	55553131	55553535	45.49	123.42	24.22	intergenic	Klf4
chr4	55655592	55656042	64.67	207.05	30.58	intergenic	AY512912
chr4	57143478	57143928	69.74	230.5	52.62	intronic	Epb4.1l4b
chr4	57178251	57178501	69.8	160.07	31.92	intergenic	Epb4.1l4b
chr4	58063045	58063597	34.86	198.7	58.61	intronic	Svep1
chr4	62984268	62984718	123.18	644.37	122.93	exonic	Col27a1
chr4	63144839	63145089	71.01	196.39	47.59	intronic	Whrn
chr4	63516334	63516584	7.63	60.63	17.66	intronic	Tnfsf8
chr4	70129628	70129878	13.62	84.83	24.17	intronic	Megf9
chr4	70132910	70133279	33.09	91.16	23.02	intronic	Megf9
chr4	88428265	88428587	14.46	63.59	16.39	exonic	Ifnz
chr4	88431209	88431560	26.38	103.38	33.11	exonic	Gm13276
chr4	88476871	88477121	21.04	82.5	11.84	intergenic	Ifna6
chr4	88567031	88567281	36.16	130.37	38.98	intergenic	Mir31
chr4	94724057	94724307	20.85	191.08	53.71	intergenic	Jun
chr4	94834623	94834873	29.95	157.71	53.05	intergenic	BC042782
chr4	98071215	98071465	91.04	229.97	40.25	intronic	Inadl
chr4	98333158	98333589	78.87	193.56	39.88	intronic	Inadl
chr4	99363491	99363741	42.12	127.23	25.12	intergenic	Alg6
chr4	104932745	104932995	37.63	122.71	30.31	intergenic	Ppap2b
chr4	105118468	105118718	17.93	70.97	12.23	intergenic	Ppap2b
chr4	105119268	105119718	80.18	430.19	147.58	intergenic	Ppap2b
chr4	105132592	105132842	96.77	273.46	71.96	intergenic	Ppap2b
chr4	105177135	105177385	14.2	70.49	19.61	intergenic	Ppap2b
chr4	106222965	106223215	66.04	314.9	116.34	intergenic	Dhcr24
chr4	106226137	106226749	25.26	220.48	53.16	intergenic	Dhcr24
chr4	106243796	106244246	32.27	399.17	65.43	exonic	Dhcr24
chr4	106345735	106346148	40.71	144.46	47	intronic	Ttc4
chr4	106405891	106406141	40.84	131.22	21.05	promoter	Fam151a
chr4	106421173	106421623	77.82	361.99	56.56	intronic	Acot11
chr4	106659315	106659565	49.81	144.01	37.13	intronic	Ssbp3
chr4	106667570	106667820	25.66	86.99	22.37	intronic	Ssbp3
chr4	107693276	107693726	118.79	299.64	64.03	intronic	Podn
chr4	107695676	107696126	182.32	574.13	113.9	exonic	Podn
chr4	107700076	107700326	41.43	110.37	27.2	intronic	Podn
chr4	108930085	108930535	150.93	367.58	81.17	intergenic	Calr4
chr4	114139108	114139358	49.88	219.68	67.79	intronic	Gm12824
chr4	115739428	115739678	22.78	85.87	26.34	exonic	Uqcrh
chr4	116399552	116399802	40.81	105.58	18.61	intronic	Tesk2
chr4	117219795	117220245	60.61	298.08	54.83	intergenic	Eri3
chr4	117722068	117722918	149.85	915.53	105.85	intronic	St3gal3
chr4	117802887	117803137	66.73	137.88	27.42	intronic	St3gal3
chr4	117916418	117916668	33.02	134.76	34.95	intronic	Ptprf
chr4	117922202	117922652	65.91	258.54	70.5	intronic	Ptprf
chr4	118069105	118069355	82.57	216.65	41.38	intronic	Szt2
chr4	118149305	118149753	71.44	195.19	39.77	intronic	Tie1
chr4	118160255	118160905	70.52	466.98	55.2	intronic	Tie1
chr4	119640298	119640548	109.05	309.47	85.14	intronic	Hivep3
chr4	119851345	119851595	20.45	50.12	8.39	intergenic	Edn2
chr4	119874554	119874804	80.57	248.5	56.8	intergenic	Edn2
chr4	119902099	119902549	177.43	456.35	118.09	intergenic	Foxo6
chr4	119947984	119948234	197.06	639.11	177.21	intronic	Foxo6
chr4	119948380	119948630	145.17	377.58	79.67	intronic	Foxo6
chr4	119956699	119956949	16.56	91.56	21.76	intronic	Foxo6
chr4	120593812	120594062	14.6	57.78	9.5	exonic	Dem1
chr4	122631812	122632062	75.5	281.2	31.85	intronic	Mfsd2a
chr4	124157928	124158378	71.44	275.7	55.69	intronic	AK132134
chr4	124483859	124484109	38.52	117.59	24.1	intronic	Mtf1
chr4	124754282	124754532	44.8	183.19	36.12	intergenic	Snip1
chr4	125090961	125091411	88.81	310.1	34.79	intergenic	Grik3
chr4	125910792	125911630	133.22	708.18	93.65	exonic	Mtap7d1
chr4	126320603	126320853	47.68	264.42	103.97	intergenic	5730409E04Rik
chr4	127004347	127004783	108.03	320.56	78.32	intronic	Gjb3
chr4	127026655	127026905	40.13	136.53	36.52	intronic	Gjb4
chr4	129181895	129182331	49.42	271.47	95.96	intergenic	Marcksl1
chr4	129741656	129741906	19.31	68.4	18.76	intronic	Col16a1
chr4	129769063	129769513	71.34	272.28	53.22	intronic	Col16a1
chr4	129774063	129774313	61.2	235.66	69.4	promoter	Col16a1
chr4	129780287	129780537	27.52	110.65	31.13	intergenic	Col16a1
chr4	130788930	130789180	55.64	181.83	49.76	intergenic	AK020914
chr4	131241659	131241909	107.41	329.33	81.16	intergenic	Ptpru
chr4	131245663	131246096	69.91	213.4	53.54	intergenic	Ptpru
chr4	131252200	131252450	44.21	192.5	65.16	intergenic	Ptpru
chr4	131611602	131612020	75.2	251.92	52.55	intronic	Epb4.1
chr4	132571994	132572244	82.14	196.72	41.39	intronic	Ahdc1
chr4	132602729	132603379	215.44	953.81	295.62	intronic	Ahdc1
chr4	132797907	132798357	101.42	415.59	109.49	intronic	Map3k6
chr4	132847199	132847449	29.55	134.44	35.36	intergenic	Wdtc1
chr4	133169816	133170066	45.19	194.77	55.68	exonic	Zdhhc18
chr4	133437794	133438044	44.57	117.22	26.52	promoter	Rps6ka1
chr4	133623886	133624136	44.05	169.4	42.87	promoter	Aim1l
chr4	133680292	133680542	94.44	282.42	57.55	intronic	Ubxn11
chr4	133875671	133875921	52.14	150.71	38.46	exonic	Trim63
chr4	134041115	134041565	103.94	293.78	50.34	intergenic	Paqr7
chr4	134047410	134047854	166.41	379.38	77.28	intergenic	Paqr7
chr4	134049101	134049526	47.97	187.19	35.08	intergenic	Paqr7
chr4	134519248	134519698	90.29	392.68	91.95	intergenic	Syf2
chr4	135132460	135132910	49.09	203.78	46.13	intergenic	Grhl3
chr4	135297903	135298411	37.41	126.83	20.24	intronic	Il22ra1
chr4	135303249	135303499	55.17	154.77	25.81	intronic	Il22ra1
chr4	135317703	135317953	19.24	102.99	24.38	intronic	Myom3
chr4	135541096	135541490	30.5	79.52	9.69	intronic	1110049F12Rik
chr4	135643255	135643505	95.3	247.01	58.13	intergenic	Rpl11
chr4	135859098	135859348	15.81	86.64	10.98	intergenic	Hnrnpr
chr4	136759562	136760012	98.7	319.07	67.71	intergenic	Wnt4
chr4	137033703	137033953	24.32	83.51	20.64	intronic	Hspg2
chr4	137081387	137081637	63.1	239.99	26.1	intronic	Hspg2
chr4	138650048	138650298	26.41	96.81	20.32	promoter	Nbl1
chr4	138742626	138743254	94.67	372.24	66.95	intergenic	Capzb
chr4	138772935	138773185	58.22	160.34	29.1	intronic	Capzb
chr4	139184358	139184608	31.55	91.48	13.64	intronic	Aldh4a1
chr4	139185934	139186184	64.31	185.18	51.33	intronic	Aldh4a1
chr4	140372309	140372559	164.25	386.68	95.77	intronic	Padi1
chr4	140833425	140833675	21.5	120.79	36.84	intergenic	Arhgef19
chr4	140853722	140854348	282.23	1089.52	138.13	intergenic	Epha2
chr4	140881298	140881548	49.61	130.49	26.03	intronic	Epha2
chr4	141580475	141580725	31.68	128.93	37.83	intronic	AK019631
chr4	141742688	141742938	59.4	176.76	35.2	intronic	9030409G11Rik
chr4	142464840	142465490	230.58	966.53	159.13	intronic	AK018156
chr4	148160514	148160764	46.51	135.26	37.8	intergenic	Casz1
chr4	148164940	148165190	29.52	125.77	31.29	intergenic	Casz1
chr4	148166343	148166593	47.78	144.71	39.03	intergenic	Casz1
chr4	148177268	148177518	67.48	191.21	52.93	promoter	Casz1
chr4	148515422	148516022	44.67	336.52	34.57	intergenic	Apitd1
chr4	148750174	148750424	67.61	346.93	88.16	intronic	Ube4b
chr4	148750774	148751024	61.33	190.7	44.09	intronic	Ube4b
chr4	148818682	148818932	91.08	227.58	53.62	intergenic	Rbp7
chr4	149673698	149673948	14.14	54.12	13.36	intronic	Rere
chr4	150082305	150082755	223.94	556.46	143.85	intergenic	Slc45a1
chr4	151301852	151302296	59.86	196.79	36.53	intergenic	Dnajc11
chr4	151618788	151619237	132.93	304.56	63.04	intronic	Acot7
chr4	152549068	152549516	47.78	234.22	39.8	intergenic	AK135377
chr4	153625341	153625791	82.57	385.79	52.24	intronic	Megf6
chr4	153803361	153803809	155.28	724.94	93.84	intronic	Prdm16
chr4	154201837	154202487	467.81	1272.89	226.16	intergenic	Ttc34
chr4	154290839	154291089	73.37	178.01	42.54	intergenic	Tnfrsf14
chr4	154322145	154322595	92.23	343.7	77.75	intergenic	Hes5
chr4	154467410	154467660	24.12	73.28	15.54	intronic	Morn1
chr4	154522511	154522761	45.69	175.53	47.54	intergenic	Morn1
chr4	154728695	154728945	22.61	109.05	17.98	exonic	Prkcz
chr4	154730399	154730847	86.23	247.29	54.41	exonic	Prkcz
chr4	154847602	154847852	85.93	241.33	59.44	intergenic	Tmem52
chr4	154861634	154861884	118.89	385.44	115.27	intergenic	Gnb1
chr4	154863234	154863484	59.3	180.02	36.78	promoter	Gnb1
chr4	155034839	155035089	44.08	132.28	28.87	exonic	Mib2
chr4	155147365	155147615	27.33	77.07	15.04	intronic	AK035229
chr5	15975219	15975469	23.33	117.41	26.72	intergenic	Hgf
chr5	17158098	17158348	19.67	103.82	34.73	intronic	Sema3c
chr5	17995455	17995855	34.82	124.39	29.94	exonic	AK076902
chr5	20317717	20318305	53.58	178.06	39.77	intronic	Phtf2
chr5	23996221	23996865	120.17	947.23	219.47	intronic	Agap3
chr5	24034558	24034808	6.09	49.04	11.26	promoter	Gbx1
chr5	24475986	24476236	27.88	117.46	18.06	intronic	Prkag2
chr5	24531927	24532177	23.36	89.63	20.28	intronic	Prkag2
chr5	28086062	28086508	81.85	185.84	34.48	intronic	Paxip1
chr5	28801684	28801934	15.12	63.42	18.67	intronic	9530036O11Rik
chr5	30603581	30603831	29.85	77.91	17.43	intergenic	Gm1060
chr5	31132086	31132534	39.17	128.45	28.12	intronic	Mapre3
chr5	31162652	31162902	23.4	89.52	15.4	intronic	Mapre3
chr5	31227607	31227857	99.75	251.94	47.54	intronic	Khk
chr5	31342226	31342676	34.27	112.62	24.14	intronic	Slc5a6
chr5	31342826	31343476	50.5	322.99	45.11	exonic	Slc5a6
chr5	31884478	31884728	32.56	161.03	51.32	intergenic	AK036733
chr5	32389001	32389651	242.28	888.35	213.9	intergenic	Bre
chr5	32559591	32560041	91.86	409.88	78.9	intronic	Plb1
chr5	32564921	32565354	68.33	314.11	44.61	intronic	Plb1
chr5	33438940	33439350	57.86	277.76	112.11	intergenic	Slc5a1
chr5	33734537	33734970	40.94	176.53	29.45	exonic	4933407H18Rik
chr5	34877755	34878405	65.78	282.53	49.99	intronic	Sh3bp2
chr5	35914298	35914548	29.81	117.05	22.33	intronic	2310079F23Rik
chr5	35919921	35920357	66.1	209.53	32.37	intergenic	2310079F23Rik
chr5	35924256	35924506	8.08	41.8	11.59	promoter	Acox3
chr5	36005193	36005443	49.12	163.81	45.08	intronic	Htra3
chr5	36097720	36098161	66.34	284.41	79.84	intergenic	Ablim2
chr5	36495887	36496320	86.07	397.07	48.76	intronic	Sorcs2
chr5	36508925	36509375	109.93	479.05	95.34	intronic	Sorcs2
chr5	36703776	36704026	46.41	127.94	23.83	intronic	Sorcs2
chr5	36725897	36726341	260.49	613.21	125.9	intronic	Sorcs2
chr5	37094377	37095027	48.4	281.36	55.17	intergenic	D5Ertd579e
chr5	39430269	39430719	38.85	142.31	27.31	intergenic	Clnk
chr5	40049331	40049581	97.03	239.78	58.22	intergenic	Hs3st1
chr5	43134480	43134730	14.53	123.43	30.35	intergenic	Gm7854
chr5	43553848	43554478	38.49	168.85	21.5	intronic	Gm7854
chr5	44355229	44355679	32.6	223.41	49.24	intergenic	Fgfbp1
chr5	45904200	45904450	31.71	82.91	16.5	intergenic	Lap3
chr5	49016099	49016500	21.21	105.18	15.14	intronic	Kcnip4
chr5	49023180	49023734	20.42	137.94	14.49	intronic	Kcnip4
chr5	52599982	52600426	63.13	183.54	26.14	intronic	9230114K14Rik
chr5	52620379	52620999	45.46	473.86	34.5	intronic	9230114K14Rik
chr5	52621811	52622061	22.16	99.74	16.77	intronic	9230114K14Rik
chr5	52899445	52899886	27.13	80.77	17.69	intergenic	Lgi2
chr5	53000781	53001031	43.13	179.41	30.18	exonic	AK033101
chr5	53266852	53267102	55.11	163.56	25.18	intergenic	Anapc4
chr5	53358209	53358459	63.92	158.73	27.78	intergenic	AK017148
chr5	53403887	53404461	46.44	246.45	50.64	intergenic	AK017148
chr5	53566358	53566807	77.04	298.33	65.99	intronic	Sel1l3
chr5	53590982	53591556	66.33	219.97	29.3	exonic	Sel1l3
chr5	64608597	64608847	52.43	180.29	45.31	intronic	Tbc1d1
chr5	64622615	64622865	13.38	95.38	30.75	intronic	Tbc1d1
chr5	64807798	64808048	39.44	141.9	24.87	intergenic	AK006413
chr5	65177102	65177352	23.24	68.47	12.27	intergenic	Klf3
chr5	65200219	65200469	18.16	53.19	10.87	intronic	Klf3
chr5	65666001	65666451	91.89	275.01	77.47	promoter	Rfc1
chr5	65758849	65759099	28.28	87.66	21.95	intronic	Klb
chr5	66415488	66415738	37.08	120.88	22.06	intronic	Rbm47
chr5	66725690	66725940	13.65	85.28	18.34	intronic	Apbb2
chr5	67148365	67148615	50.96	315.31	121.82	intronic	Limch1
chr5	67712849	67713274	45.1	135.11	29.13	intronic	Slc30a9
chr5	67912428	67912878	190.23	540.67	144.35	intergenic	C330024D21Rik
chr5	67920735	67920985	14.33	54.49	10.02	intergenic	C330024D21Rik
chr5	75306817	75307067	15.12	68.53	21.93	intergenic	Chic2
chr5	77529711	77530154	76.64	200.75	30.92	intronic	Hopx
chr5	81991337	81991587	32.86	116.94	13.73	intronic	Lphn3
chr5	89292997	89293247	94.47	258.05	70.96	intergenic	Slc4a4
chr5	91764351	91764601	48.01	215.74	20.47	intergenic	Btc
chr5	92625992	92626242	27.49	86.86	20.03	intronic	Uso1
chr5	92650486	92650887	82.04	289.4	44.34	intergenic	Ppef2
chr5	93182137	93182787	80.96	239.3	30.53	intronic	Shroom3
chr5	93338498	93338748	39.14	177.81	40.13	intronic	Shroom3
chr5	93454954	93455204	23.73	74.83	15.11	intergenic	Ankrd56
chr5	93857341	93857773	68.27	236.53	29.3	intergenic	Ccng2
chr5	99268005	99268412	21.6	68.17	14.36	intergenic	Bmp3
chr5	99801663	99802081	41.37	120.72	26.92	intronic	A930011G23Rik
chr5	102274960	102275410	172.82	511.07	110.05	intronic	Wdfy3
chr5	103698201	103698451	33.08	119.08	32.72	intergenic	Mapk8
chr5	104194033	104194283	5.47	66.17	10.75	intronic	Aff1
chr5	104685646	104685896	14.17	97.99	15.17	intergenic	AK030263
chr5	105014897	105015308	33.9	97.97	24.89	intergenic	AK049668
chr5	106101788	106102222	48.53	168.07	39.02	intergenic	Lrrc8d
chr5	106102881	106103131	26.51	113.64	35.73	intergenic	Lrrc8d
chr5	107496694	107496944	61.13	207.64	45.26	intergenic	Tgfbr3
chr5	108401838	108402283	88.75	210.21	37.87	intronic	Fam69a
chr5	108887213	108887463	19.9	83.67	11.79	intergenic	Pcgf3
chr5	110695959	110696609	75.79	366.87	83.36	intronic	Pgam5
chr5	110703138	110703565	22.29	79.33	12.52	exonic	Pxmp2
chr5	113103742	113103992	45.2	152.53	21.86	intergenic	Myo18b
chr5	113306701	113306951	43.89	152.74	43.98	intronic	Myo18b
chr5	113341398	113342042	277.19	849.84	183.7	exonic	Adrbk2
chr5	114226539	114226789	69.35	208.03	62.75	exonic	Iscu
chr5	114317251	114317501	53.44	266.96	54.93	intronic	Coro1c
chr5	114423844	114424094	58.94	185.95	48.66	intronic	Ssh1
chr5	114821201	114821847	70.69	272.58	35.15	intronic	Kctd10
chr5	115152406	115152656	20.94	61.45	10.76	intergenic	Tchp
chr5	115363769	115364019	64.37	152.17	27.39	intergenic	Oasl2
chr5	115512454	115512901	56.16	139.87	31.64	intronic	Sppl3
chr5	115554853	115555103	17.48	84.75	7.03	intergenic	Acads
chr5	115986429	115986679	12.5	59.13	18.46	intronic	Pxn
chr5	116464034	116464284	21.7	126.67	23.68	exonic	Prkab1
chr5	117771656	117771906	34.49	174.26	55.09	promoter	Vsig10
chr5	118904536	118904786	64.14	218.24	64.68	intergenic	Med13l
chr5	119432810	119433247	104.07	262.18	51.61	intergenic	AK162140
chr5	119532813	119533463	225.28	675.67	118.09	intergenic	AK162140
chr5	119989926	119990176	55.44	127.36	22.54	intergenic	BC100494
chr5	121347557	121347976	47.12	162.98	37.41	intronic	Oas1a
chr5	121387090	121387340	34.49	94.44	18.4	intergenic	Rph3a
chr5	122303197	122303447	34.3	96.16	20.04	exonic	Fam109a
chr5	122305239	122305489	96.7	259.83	67.18	intergenic	Fam109a
chr5	123130593	123130843	36.59	190.91	60.7	exonic	P2rx7
chr5	123588006	123588256	27.82	127	43.96	intergenic	Setd1b
chr5	125553436	125553886	78.97	390.02	68.98	intronic	Ncor2
chr5	125566956	125567206	28.86	121.87	21.5	intronic	Ncor2
chr5	129596898	129597148	51.91	158.22	40.61	intergenic	Gpr133
chr5	132623523	132623773	56.36	173.14	49.73	intronic	Auts2
chr5	133853316	133853566	15.28	140.67	13.99	intergenic	AK076755
chr5	133928650	133928900	35.94	118.34	28.06	intergenic	AK076755
chr5	134597051	134597496	149.36	537.95	143.88	intronic	Gatsl2
chr5	134664290	134664540	12.63	68.09	12.37	intronic	Gtf2ird2
chr5	135087837	135088477	210.23	641.57	194.44	intronic	Lat2
chr5	135437458	135437905	39.99	131	17.39	intergenic	Cldn4
chr5	135451812	135452062	19.57	63.88	13.28	intergenic	Cldn3
chr5	135578981	135579418	30.73	195.49	56.56	intergenic	Mlxipl
chr5	136768322	136768766	121.94	465.27	94.81	intronic	Cux1
chr5	136770262	136770512	36.91	141.35	44.75	intronic	Cux1
chr5	137060667	137060917	152.6	651.67	236.19	intergenic	Cux1
chr5	137074402	137074852	62.38	337.45	63.69	intergenic	Cux1
chr5	137402394	137402644	42.48	139.73	36.87	intronic	4933404O12Rik
chr5	137459624	137460274	23.43	269.13	25.21	intronic	Znhit1
chr5	137642701	137642951	30.24	144.45	43.05	intergenic	Muc3
chr5	138245637	138246687	146.85	707.59	83.79	intronic	Zcwpw1
chr5	138590197	138590447	10.93	54.99	14.83	intronic	Zfp113
chr5	138791053	138791303	38.45	227.11	52.7	intergenic	Stag3
chr5	139783465	139783715	12.89	40.82	7.08	exonic	Adap1
chr5	139801785	139802035	80.7	288.71	87.91	promoter	Adap1
chr5	139817175	139817425	17.77	55.01	10.52	intronic	Cox19
chr5	139850909	139851159	40.25	145.91	33.48	intronic	3110082I17Rik
chr5	139956787	139957037	14.04	56.74	14.41	intronic	Zfand2a
chr5	139974894	139975144	18.43	74.02	15	intergenic	Zfand2a
chr5	140113778	140114028	69.31	206.05	48.3	intergenic	Micall2
chr5	140297417	140297667	23.63	97.78	17.03	intergenic	Psmg3
chr5	140826703	140827147	36.62	114.84	23.9	intronic	Snx8
chr5	140840436	140840686	33.48	92.79	18.6	intronic	Snx8
chr5	141065543	141065793	32.14	136.23	38.17	intergenic	Lfng
chr5	141281712	141281962	26.15	141.54	18.46	intronic	Gna12
chr5	142324050	142324500	45.1	197.41	36.17	intronic	Sdk1
chr5	142882309	142882759	63.69	236.22	60.47	intronic	Foxk1
chr5	142927879	142928129	89.38	298.61	53.35	intronic	Foxk1
chr5	143090529	143090779	23.89	110.29	23.85	intergenic	Mmd2
chr5	143112665	143113098	59.92	245.86	44.04	intronic	Wipi2
chr5	143686077	143686327	70.43	289.99	97.9	intergenic	Actb
chr5	144803892	144804306	71.96	250.1	63.4	intronic	Ocm
chr5	145872606	145872856	19.51	57.04	12.32	intergenic	Arpc1b
chr5	145880589	145881005	106.98	353.04	112.86	intronic	Arpc1b
chr5	145976183	145976597	27.62	110.49	22.63	intronic	Zkscan5
chr5	146035321	146035571	17.67	59.54	8.51	intergenic	Zfp498
chr5	147095505	147095937	75.11	201.96	50.52	intronic	Cdk19
chr5	147505747	147506197	68.79	181.03	47.54	intergenic	Usp12
chr5	148120139	148120389	50.14	112.87	23.21	promoter	Cdx2
chr5	148682562	148683006	75.07	216	36.03	exonic	Pomp
chr5	148687836	148688086	41.76	130.12	16.87	intergenic	Pomp
chr5	148714794	148715442	56.25	353.03	58.28	intergenic	Slc46a3
chr5	149569584	149570034	78.61	388.93	114.23	intergenic	2210417A02Rik
chr5	150032909	150033511	63.78	221.99	38.65	intergenic	Uspl1
chr5	151406326	151406576	38.55	105.13	23.21	exonic	BC062895
chr6	17438497	17438747	50.66	177.66	49.7	intronic	Met
chr6	18050050	18050300	13.12	47.97	9.82	intronic	Asz1
chr6	21888353	21888603	21.27	77.28	17.02	intergenic	Ing3
chr6	22277964	22278388	41.56	210.97	43.89	intronic	Fam3c
chr6	22399250	22399500	70.59	243.6	56.53	intergenic	Fam3c
chr6	24911061	24911311	29.75	67.33	12.34	intergenic	Tmem229a
chr6	24913369	24913619	24.91	71.78	14.07	intergenic	Tmem229a
chr6	24915982	24916365	48.4	179.23	33.37	intergenic	Tmem229a
chr6	30593635	30594085	95.83	553.33	146.56	intronic	Cpa1
chr6	31018618	31019068	29.13	141.89	18.94	intergenic	Mir29b-1
chr6	31030859	31031109	45.52	123.84	22.24	intergenic	Mir29b-1
chr6	33001606	33002032	99.06	256.4	55.67	intronic	Chchd3
chr6	39119200	39119642	57.7	187.01	30.55	intronic	Jhdm1d
chr6	39194367	39194617	90.06	241.17	62.93	intergenic	Jhdm1d
chr6	39204007	39204447	18.78	101.92	30.57	intergenic	Jhdm1d
chr6	39217791	39218041	16.82	98.1	34.72	intergenic	Jhdm1d
chr6	42197045	42197665	31.32	243.99	38.79	exonic	Gstk1
chr6	42316689	42317291	44.96	263.88	32.43	exonic	Epha1
chr6	42866225	42866475	4.91	43.28	7.42	intergenic	Olfr447
chr6	47755558	47755986	31.03	135.15	14.89	promoter	Mir704
chr6	47868633	47869420	32.6	235.19	35.73	promoter	Zfp212
chr6	48169078	48169328	52.19	160.19	43.32	intronic	AK158926
chr6	48363782	48364220	83.62	264.9	39.4	intronic	Krba1
chr6	48623446	48623696	12.54	91.87	31.58	intergenic	Gimap9
chr6	48823223	48823473	13.45	63.9	13.88	intergenic	Gm7932
chr6	50190450	50190700	22.58	63.62	11.91	intronic	Dfna5
chr6	50191670	50192094	84.01	347.3	107.07	intronic	Dfna5
chr6	50240547	50240994	48.17	199.3	52.26	intergenic	Osbpl3
chr6	50314419	50314669	121.83	290.18	56.53	intronic	Osbpl3
chr6	54218035	54218285	27.1	71.25	13.45	intronic	Chn2
chr6	54230258	54230708	24.74	231.59	36.26	promoter	AK080009
chr6	54296120	54296704	111.95	367.06	43.67	intronic	9130019P16Rik
chr6	54348122	54348372	35.77	128.79	20.74	intronic	9130019P16Rik
chr6	54365850	54366100	31.65	108.06	14	intronic	9130019P16Rik
chr6	54428146	54428396	37.89	155.06	24.84	intronic	Wipf3
chr6	54440008	54440258	22.09	86.06	26.94	intronic	Wipf3
chr6	55287972	55288622	291.13	785.36	137.73	intronic	Aqp1
chr6	55300337	55300587	71.84	186.84	33.83	intergenic	Aqp1
chr6	57719265	57719515	15.71	99.37	27.07	intronic	Vopp1
chr6	57722836	57723086	38.39	170.47	35.63	intronic	Vopp1
chr6	59266001	59266251	27.19	76.74	8.97	intergenic	Gprin3
chr6	66806469	66806719	31.65	96.25	25.48	intergenic	AK087755
chr6	67077810	67078060	37.37	114.39	16.5	intronic	AK039826
chr6	70765473	70765887	32.23	122.58	26.31	intergenic	Rpia
chr6	70771356	70771606	20.94	68.55	11.52	intergenic	Eif2ak3
chr6	71105841	71106091	82.2	297.97	95.89	intergenic	Thnsl2
chr6	73196492	73196925	54.29	223.58	73.74	promoter	Suclg1
chr6	78316983	78317390	34.92	113.06	30.44	intergenic	Reg3b
chr6	82739991	82740379	26.38	77.99	15.95	intergenic	Hk2
chr6	82812036	82812478	92.52	311.86	46.44	intergenic	AK010122
chr6	83084165	83084415	36.55	98.32	20.21	promoter	Rtkn
chr6	83396051	83396493	123.38	323.71	58.46	intronic	B230319C09Rik
chr6	83403449	83403699	36.55	104.47	24.23	intergenic	B230319C09Rik
chr6	84178251	84178501	95.01	201.31	40.09	intergenic	Dysf
chr6	86450750	86451200	36.92	192.77	52.81	intergenic	AK009724
chr6	86559514	86559764	70.79	179.96	39.69	intergenic	Asprv1
chr6	86987815	86988241	64.34	337.4	116.71	intergenic	Gfpt1
chr6	87022853	87023103	38.26	111.65	23.9	intronic	Gfpt1
chr6	87487863	87488113	57.4	323.75	120.45	intergenic	Arhgap25
chr6	87709489	87709739	84.67	200.34	44.74	intergenic	Ccdc48
chr6	88460517	88460767	44.25	132.69	28.12	intronic	Sec61a1
chr6	88855043	88855293	29.49	90.25	20.4	promoter	Tpra1
chr6	89365060	89365473	28.93	130.69	33.31	intronic	Chchd6
chr6	91420780	91421201	14.5	88.72	23.54	intronic	Chchd4
chr6	94421149	94421399	33.84	85.86	18.46	intergenic	Slc25a26
chr6	94659961	94660411	60.22	185.56	37.62	intergenic	Lrig1
chr6	94965453	94965703	6.48	51.52	5.25	intergenic	AK156148
chr6	95713759	95714009	30.93	90.46	17.18	intergenic	Suclg2
chr6	97157045	97157495	17.15	136.89	32.45	promoter	Uba3
chr6	97357433	97357683	37.67	129.63	31.48	intronic	Frmd4b
chr6	97472910	97473160	29.81	102.45	21.54	intronic	Frmd4b
chr6	98113123	98113532	48.3	152.52	34.2	intergenic	Gm765
chr6	98117673	98117923	43.82	186.32	26.95	intergenic	Gm765
chr6	98120110	98120550	27.39	247.09	35.85	intergenic	Gm765
chr6	98120680	98121120	24.71	157.45	26.23	intergenic	Gm765
chr6	98123728	98123978	56.97	221.93	60.88	intergenic	Gm765
chr6	98124128	98124378	25.07	71.32	10.51	intergenic	Gm765
chr6	98184142	98184392	23.33	82.36	23.83	intergenic	Gm765
chr6	98261644	98262094	56.72	312.02	56.67	intronic	Gm765
chr6	99237814	99238064	44.38	131.76	25.63	intronic	Foxp1
chr6	99297965	99298215	49.06	147.19	32	intronic	Foxp1
chr6	100101861	100102276	43.27	179.19	38.45	intergenic	Rybp
chr6	106722690	106723340	33.09	177.09	46	exonic	Trnt1
chr6	106738776	106739316	31.84	225.91	23.41	exonic	Crbn
chr6	106747475	106747725	17.84	55.07	12.99	intronic	Crbn
chr6	108556778	108557225	64.9	445.35	134.09	intronic	AK039720
chr6	113300694	113300944	28.18	93.15	11.41	intergenic	Camk1
chr6	113427289	113427539	51.35	299.25	112.31	intronic	Il17rc
chr6	113437074	113437324	65.84	181.52	48.17	intronic	Creld1
chr6	113619967	113620217	35.8	110.83	26.55	exonic	Irak2
chr6	114296332	114296582	47.62	140.76	36.5	intergenic	Slc6a1
chr6	114339555	114339805	35.44	130.9	22.76	intergenic	Hrh1
chr6	114356975	114357417	49.94	243.38	87.15	intronic	Hrh1
chr6	115534374	115534624	68.63	161.21	34	exonic	2510049J12Rik
chr6	116266871	116267121	22.29	76.81	14.24	intronic	Anubl1
[truncated: 556 more rows]

## Sheet: colon-specific
Table S5: Differential DHS along the length of the intestine; colon-specific
chrom	start	stop	duodenum_value	ileum_value	colon_value	feature	nearest_gene
chr1	186175537	186176587	208.24	160.41	1221.72	intergenic	Npy1r
chr1	72460975	72461816	180.16	188.94	1202.83	intergenic	Tsc1
chr1	169427077	169428327	132.15	114.36	1115.2	intergenic	Lrrc52
chr1	40397260	40398053	53.61	57.23	1006.93	intronic	Armc4
chr1	89617784	89619034	386.67	317.08	1224.97	intergenic	Plcb4
chr1	34372046	34372875	115.33	140.84	1047.05	intergenic	EG328479
chr1	47273358	47274408	61.49	60.42	933.17	intergenic	Fam125b
chr1	19839813	19840663	54.09	50.56	917.83	intergenic	Lmo4
chr1	160285974	160286821	211.67	171.19	1008.43	promoter	Adamts3
chr1	69637688	69638863	97.03	171.92	1006.44	intronic	Prkg1
chr1	82232309	82233129	134.76	114.96	918.25	exonic	Gli2
chr1	46464804	46465944	123.64	193.07	980.59	intergenic	Tesc
chr1	51681386	51682800	201.83	240.61	1015.76	intergenic	AK002390
chr1	140244778	140246228	107.24	77.24	818.05	intergenic	AK200207
chr1	32805117	32806367	88.17	69.33	808.74	intergenic	Frem2
chr1	194465598	194466445	80.35	70.62	797.78	intronic	1700044K03Rik
chr1	51776794	51777644	322.65	255.53	975.92	intergenic	Pepd
chr1	120721796	120722646	240.41	307.51	996.97	intergenic	AK163160
chr1	156638621	156639257	141.55	245.14	924.95	intergenic	Tln2
chr1	138949298	138950130	105.58	168.32	840.49	intergenic	2310079F23Rik
chr1	181021720	181022758	86.57	84.26	744.75	intronic	Atp6v1g3
chr1	62784489	62785123	72.03	64.15	724.21	exonic	Npas3
chr1	155889920	155890560	136.96	213.39	870.81	intronic	Foxn4
chr1	63999772	64000414	331.02	206.77	850.47	intergenic	Cep350
chr1	157702156	157703006	205.62	173.7	799.68	intronic	Cit
chr1	186830667	186831717	140.43	120.61	742.77	intergenic	AK076809
chr1	44608166	44608816	337.6	259.18	874.8	promoter	Lrig3
chr1	155506057	155506691	85.65	126.27	740.98	intronic	Dnajb9
chr1	35580390	35581240	100.51	133.25	723.43	intergenic	Vps13d
chr1	108216852	108217702	139.9	89.42	673.14	intronic	Akr1e1
chr1	77427662	77428912	70.82	80.49	655.43	intronic	Adk
chr1	37415684	37416134	170.96	280.82	854.07	intronic	AK003327
chr1	195340122	195340933	221.33	276.99	836.28	intergenic	Dym
chr1	189427744	189428392	340.94	227.1	786.02	intergenic	Gucy1b2
chr1	165312062	165312912	84.6	113.88	672.24	intergenic	AK133014
chr1	56076078	56077328	99.16	107.59	664.89	intronic	Ywhab
chr1	62683561	62684011	186.84	103.18	660.39	intronic	Negr1
chr1	153454781	153455631	104.73	66.79	623.22	intronic	Ncrna00086
chr1	13256303	13257153	160.33	127.11	683.01	intronic	AK192985
chr1	129801579	129802157	60.77	101.02	655.03	intronic	Rad51l1
chr1	156037196	156037842	175.81	187.61	739.11	intergenic	Clec14a
chr1	35442334	35442784	347.49	214	764.19	intergenic	Pla2g4a
chr1	157344399	157345249	59.07	52.75	602.64	intergenic	Dixdc1
chr1	155816498	155817480	106.92	127.74	672.1	intergenic	Snx24
chr1	69833232	69833882	82.7	148.22	689.72	intergenic	AK157456
chr1	129886664	129887481	238.79	242.21	781.6	intronic	AK029598
chr1	145395597	145396396	45.62	89.18	616.4	intergenic	Adamtsl3
chr1	181843504	181844128	218.75	314.76	841.73	intergenic	Atp12a
chr1	151807727	151808377	270.81	173.85	700.68	exonic	Gcnt1
chr1	120898161	120898811	147.66	138.09	654.35	intronic	Slc2a13
chr1	160509573	160510587	74.32	48.93	565.15	exonic	Pard3b
chr1	56221653	56222703	75.66	154.21	668.76	intergenic	Arhgap10
chr1	181800503	181801553	89.28	100.73	613.27	intergenic	Eif4e2
chr1	172243504	172244154	77.11	91.38	598.78	intergenic	Speer4f
chr1	128106598	128107202	61.39	63.6	566.63	intronic	Pard3b
chr1	162869902	162870498	80.48	160.88	663.51	exonic	Rnaset2b
chr1	25886692	25887142	129.13	85.86	587.48	promoter	0610040J01Rik
chr1	62691143	62691954	153.69	147.33	645.73	intergenic	Pgm2
chr1	153539894	153540534	67.35	77.43	573.9	intronic	Frmd4b
chr1	60213918	60214568	129.86	105.98	602.37	intergenic	Frmd4a
chr1	123337341	123337791	106.49	99.13	593.72	intronic	Zfat
chr1	180989501	180990551	122.83	137.36	630.33	intronic	Nckap5
chr1	153870209	153871211	69.81	53.95	545.39	intronic	AK144912
chr1	46046140	46046790	68.72	40.23	530.24	intergenic	Akr1c14
chr1	192722568	192723418	196.52	232.5	721.83	exonic	Pdia5
chr1	40281404	40282358	142.59	110.24	596.97	promoter	Sgms1
chr1	167262903	167263666	71.57	70.73	552.52	exonic	Fnip2
chr1	34208557	34209380	67.84	46.26	526.6	exonic	Gpr176
chr1	129251375	129252174	102.73	194.17	673.02	intronic	Wdr11
chr1	94908680	94909127	82.99	156.34	632.37	exonic	M13188
chr1	89141292	89142142	98.9	183.89	656.14	intergenic	Ptprg
chr1	67043205	67043847	71.25	94.52	564.9	intergenic	Iqch
chr1	40323597	40324447	167.19	119.45	585.01	exonic	Hnrnpul1
chr1	46088514	46089504	82.41	69.52	534.54	promoter	AK003327
chr1	34311803	34312978	94.81	112.22	576.94	intronic	Slc14a2
chr1	163965928	163966978	195.2	141.87	605.13	intronic	Abca4
chr1	120519350	120519992	201.56	283.32	743.65	intergenic	Mical3
chr1	87632175	87632625	187.81	112.55	570.8	intronic	Pf4
chr1	152418668	152419506	51.48	36.71	494.01	intronic	BC006965
chr1	191608493	191609343	150.91	214.9	666.78	promoter	Fam168a
chr1	64335282	64335878	37.14	53.06	501.8	intergenic	AK080030
chr1	160427821	160428271	61.95	35.88	483.81	intronic	Pip5k1b
chr1	57382364	57383187	71.44	48.71	493.72	intergenic	Bcl2
chr1	184328680	184329330	61.2	76.45	521.37	intergenic	Smok3a
chr1	133558216	133558666	154.11	94.93	538.82	promoter	Rtcd1
chr1	138048426	138048966	39.83	57.29	492.34	exonic	Ace
chr1	55953565	55954800	114.8	78.65	512.94	intergenic	Phactr2
chr1	62997801	62998393	97.99	68.38	501.94	intergenic	Rai1
chr1	40336132	40336982	73.51	59.99	493.06	intronic	Lyzl4
chr1	107760759	107761609	139.02	93.84	520.52	intergenic	Socs6
chr1	95171929	95172567	149.66	227.98	653.83	exonic	2700049A03Rik
chr1	155839389	155840039	159.55	183.15	603.87	intergenic	Glis3
chr1	160860828	160862058	128.65	105.68	525.11	intronic	AK080425
chr1	92960493	92960943	58.02	96.61	515.84	intronic	2010111I01Rik
chr1	5251055	5252265	91.96	70.94	489.08	intergenic	Arrdc4
chr1	62968422	62969236	113.04	98.42	516.46	intergenic	Arhgap39
chr1	9617369	9617815	166.15	340.44	757.59	intronic	Tmem154
chr1	157369320	157370170	128.16	159.31	575.8	intronic	Hivep3
chr1	62095196	62095646	87.94	164.88	581.27	intronic	Foxa2
chr1	130575267	130576317	134.38	110.2	526.44	intergenic	Galntl4
chr1	84800385	84801029	77.92	61.91	476.18	intronic	Grin3a
chr1	107930873	107931523	111.53	143.76	553.83	intergenic	Ptprn2
chr1	43935904	43936554	196.46	98.95	507.39	intergenic	Tmem182
chr1	129061325	129061935	108.52	181.08	587.48	intergenic	Nbas
chr1	43647433	43648083	106.75	104.27	509.89	intergenic	Cacna1d
chr1	40381706	40382736	183.93	101.74	507.07	intronic	Casr
chr1	181796341	181796991	89.6	63.39	468.4	intergenic	Myo1b
chr1	184388450	184389082	62.8	63.52	468.02	exonic	Grin3a
chr1	34346966	34347616	177.87	113.1	516.37	promoter	Abhd8
chr1	77123194	77123975	118.76	71.89	474.63	intergenic	Casz1
chr1	186499496	186499940	191.08	143.55	546.02	intergenic	Fam134b
chr1	34176757	34177207	204.5	182.55	583.65	promoter	Tnni3k
chr1	132927703	132928323	87.78	67.4	468.24	intergenic	Cd86
chr1	64083510	64084132	132.71	150.05	550.18	promoter	AK160260
chr1	62814189	62814639	76.03	73.99	473.86	promoter	Rbbp8
chr1	189410181	189411203	153.56	107.88	507.5	intergenic	Ino80d
chr1	44609166	44609816	183.2	116.29	514.99	intronic	Mertk
chr1	94092383	94093233	131.1	139.08	535.79	intergenic	Ppp4r1l-ps
chr1	95270030	95270480	162.36	243.06	638.97	promoter	Cyp2f2
chr1	166304113	166304727	44.74	57.73	453.05	intronic	Gprc5a
chr1	34317762	34318468	77.27	72.73	467.76	intronic	Klf5
chr1	153736888	153737842	140.33	109.82	504.3	exonic	Dusp26
chr1	128328087	128328507	156.73	236.39	629.69	intronic	Lrrc28
chr1	99856335	99857575	60.12	41.14	433.9	intronic	Ncoa1
chr1	162054026	162054475	206.87	100.69	492.09	intronic	AK010245
chr1	94855486	94856222	98.9	170.84	561.28	intergenic	1700025G04Rik
chr1	40323197	40323447	200.38	151.52	540.6	promoter	Chchd3
chr1	64040103	64040552	62.44	64.06	452.71	intergenic	Klf7
chr1	194611444	194612294	135.33	116.18	504.56	intergenic	AK043460
chr1	14652604	14653406	22.88	20.45	404.75	intergenic	Ebf4
chr1	56346257	56347107	42.32	77.47	460.26	intergenic	Kif21b
chr1	194571075	194571525	199.73	135.02	517.7	intronic	Timp2
chr1	13292044	13292494	66.07	64.95	447.4	intronic	Krtap26-1
chr1	25944660	25945306	50.76	58.97	441.27	intergenic	Med13l
chr1	180991847	180992297	184.97	133.89	514.63	intronic	AK143085
chr1	59333432	59334279	86.63	74.77	454.85	intronic	Mcc
chr1	108462558	108463608	158.79	190.81	570.32	intronic	Cog5
chr1	93000848	93001289	89.87	195.9	574.3	intronic	AK006031
chr1	172479120	172479556	169.33	141.6	519.29	intronic	1700112E06Rik
chr1	57326632	57327074	140.69	81.23	458.91	intergenic	BC023070
chr1	40897324	40897974	125.5	154.41	527.57	intronic	Btbd3
chr1	191128012	191128618	45.13	52.97	425.57	intronic	AY512912
chr1	79732914	79733764	103.05	204.05	576.5	intronic	Afap1l2
chr1	63752303	63752753	229.61	185.68	557.9	intronic	Hs3st3b1
chr1	7492508	7493156	81.19	153.67	524.31	intergenic	Mtap4
chr1	196783184	196783616	79.59	96.21	466.5	intronic	Cd160
chr1	152618072	152618716	49.45	39.58	408.9	intronic	Pkia
chr1	161080293	161080933	151.23	78.37	446.54	intronic	Ppp1r12a
chr1	53902367	53903217	171.67	186.67	550.9	intronic	Slc39a10
chr1	51942544	51942976	168.64	160.07	523.24	intronic	Plekhg1
chr1	72503499	72504537	91.57	71.98	434.95	intronic	AB349959
chr1	109838303	109838753	189.87	104.4	467.08	exonic	Lrba
chr1	140403562	140404412	216.36	135.46	498.13	intronic	Tcf7l1
chr1	20467900	20468350	130.21	100.23	461.45	intronic	Lpar3
chr1	130662909	130663535	80.08	81.37	441.28	intergenic	Zfp236
chr1	77975695	77976345	50.04	58.41	418.1	intergenic	Mtmr7
chr1	184662558	184663324	65.42	92.56	452.12	intergenic	Trib2
chr1	156482742	156483792	89.28	78.24	437.44	exonic	Cox10
chr1	38922906	38923756	99.52	66.2	425.12	exonic	Cd200r2
chr1	138893347	138894038	57.04	82.08	440.01	intergenic	Mtap1a
chr1	135401458	135402092	115.13	183.9	541.68	intergenic	Fstl4
chr1	99799289	99799883	81.72	83.17	440.38	intronic	Apaf1
chr1	35896490	35896740	193.68	240.11	595.64	intergenic	Slc38a1
chr1	152589338	152589784	38.16	22.73	374.49	intronic	Phlda1
chr1	22594617	22595265	37.57	33.93	384.61	intronic	Ankrd12
chr1	38025452	38026076	66.86	75.77	425.98	intergenic	Fbxo42
chr1	64897216	64898066	88.39	144.42	492.89	intronic	Fto
chr1	46951120	46951718	109.24	121.18	467.85	intergenic	AK041976
chr1	36751632	36752443	93.4	192.2	533.42	intergenic	AK139890
chr1	121225491	121225941	155.88	128.58	467.65	promoter	Eif4g3
chr1	32747271	32747721	21.93	16.11	354.85	intergenic	Tmem66
chr1	165687496	165688406	64.44	59.05	397.12	intergenic	Twistnb
chr1	38319096	38319746	64.18	80.1	417.86	intronic	4922501L14Rik
chr1	67523742	67524192	50.2	27.87	364.86	intergenic	Qpct
chr1	160600408	160600658	70.3	69.22	405.27	intronic	Rnls
chr1	40375454	40376064	36.82	38.4	373.47	intergenic	Aldoart1
chr1	71933396	71934032	74.84	69.73	404.57	promoter	Cmah
chr1	5578211	5578661	81.65	74.18	408.28	promoter	Tmx1
chr1	80022398	80022848	37.9	58.36	391.96	intergenic	Gm13498
chr1	40921828	40922237	102.17	148.94	481.87	intergenic	Acan
chr1	89866618	89867468	87.97	47.9	380.57	intronic	Utrn
chr1	163935379	163935810	246.1	154.76	484.73	exonic	Sik3
chr1	159617968	159618418	121.58	121.45	447.19	intergenic	AK043004
chr1	69475837	69476636	45.33	32.15	357.84	intergenic	Barx2
chr1	82278812	82279647	123.31	99.89	424.54	intronic	1110012J17Rik
chr1	161967019	161967827	80.54	76.39	400.96	intergenic	Prickle1
chr1	69365988	69366616	38.68	41.39	363.63	intergenic	Adra1b
chr1	91696507	91697153	107.21	81.58	403.45	intronic	Foxp1
chr1	155928144	155928394	167.98	151.55	473.19	intronic	Naaladl2
chr1	193572559	193573111	53.31	60.76	381.9	intronic	Chordc1
chr1	189467902	189468344	55.34	58.64	379.46	intronic	Nptx2
chr1	157920523	157920973	211.67	148.63	469.18	intergenic	0610040J01Rik
chr1	61972309	61972959	69.77	47.56	367.86	intronic	Bsdc1
chr1	57392942	57393768	102.21	80.8	401.04	intergenic	Papss1
chr1	61501217	61501655	30.37	21.82	340.52	intergenic	Lbh
chr1	133357546	133358196	69.45	64.05	382.47	intronic	2700097O09Rik
chr1	167028862	167029712	39.04	58.29	376.18	intergenic	Ttc28
chr1	72446300	72446750	99.62	108.18	425.45	intergenic	Capn13
chr1	172662678	172663126	47.52	71.23	387.94	intronic	AK040707
chr1	55960935	55961857	46.73	32.43	346.91	intergenic	Osgin2
chr1	130716141	130716958	89.87	100.4	414.29	intergenic	Zdhhc17
chr1	31051862	31052496	44.74	46	358.49	intergenic	Rasd2
chr1	39466889	39467739	121.03	163.64	475.5	intronic	Cebpa
chr1	187236929	187237779	55.21	37.01	347.26	exonic	Msc
chr1	123258890	123259740	77.4	104.41	413.57	intergenic	Hmcn1
chr1	71373332	71373982	73.83	103.26	412.13	intronic	Sh3bgrl3
chr1	193177033	193177474	57.77	41.93	350.26	intronic	Rbm47
chr1	59890547	59890966	67.91	55.78	363.61	intronic	Tpcn1
chr1	166074931	166075181	93.92	203.44	509.79	exonic	Atf7
chr1	153421189	153422036	67.05	44.77	350.63	intronic	Nmnat3
chr1	5385699	5386349	39.93	29.45	335.15	intergenic	Trim42
chr1	186265051	186265491	142.68	204.16	509.38	intergenic	Zbtb16
chr1	88112721	88113571	64.64	59.05	363.41	intronic	Lclat1
chr1	23359670	23360101	103.29	110.05	414.05	intergenic	AK045624
chr1	160432146	160432796	95.53	64.87	368.8	exonic	Svep1
chr1	46184884	46185334	89.38	155.01	458.86	exonic	1500009L16Rik
chr1	40797417	40798067	42.68	36.55	338.51	intronic	Tcfcp2l1
chr1	172403589	172403839	98.47	251.35	553.13	intronic	Sp3
chr1	99807120	99807877	57.4	68.12	369.89	intronic	AK036466
chr1	91320994	91321634	132.77	112.94	412.49	intergenic	Zfp13
chr1	37097814	37098258	162.49	196.04	494.16	intronic	Rnf212
chr1	146106211	146106851	32.56	25.16	323.23	intergenic	Iqcf3
chr1	152740823	152741401	75.63	138.92	436.91	intronic	Plcb4
chr1	20048328	20048870	32.37	31	328.57	exonic	Kctd12
chr1	172340450	172341064	106.45	125.2	422.75	intronic	Fto
chr1	175350522	175350950	116.89	160.56	457.02	promoter	Pde7b
chr1	188841961	188842410	90.85	93.13	388.48	intergenic	2310046A06Rik
chr1	169166764	169167204	89.57	174.72	469.82	exonic	AI747448
chr1	99815046	99815456	91.7	77.87	372.69	intronic	Aplp2
chr1	69471822	69472440	36.72	78.96	372.96	intergenic	AK139544
chr1	152818444	152819058	104.43	110.18	404.02	intronic	Thsd4
chr1	30862543	30863193	67.45	74.31	367.28	exonic	Mc2r
chr1	157456573	157457023	154.86	108.63	401.34	intronic	Agl
chr1	107712482	107712932	74.16	88.42	381.08	intronic	Mgat5
chr1	55960040	55960728	41.99	39.34	330.15	intergenic	AK141411
chr1	180942340	180942790	186.9	95.52	384.78	intronic	Atxn1
chr1	137634847	137635467	51.71	94.62	383.19	intronic	Wfdc2
chr1	57900619	57901269	122.85	105.6	393.53	promoter	Rars2
chr1	57391972	57392612	100.54	79.72	366.95	intergenic	AK144120
chr1	130498568	130499202	114.84	118.2	403.7	intergenic	Wdr7
chr1	181186556	181187006	145.23	117.6	402.13	intronic	Gls2
chr1	91713034	91713803	68.99	82.47	366.84	intronic	AK020793
chr1	64803734	64804182	145.11	132.8	416.61	intergenic	Sox2ot
chr1	35389965	35390609	50.1	43.53	326.91	intergenic	Itga8
chr1	93524825	93525275	135.98	145.22	428.41	intergenic	Gm6289
chr1	138955921	138956527	49.45	36.12	319.19	intergenic	Nsg2
chr1	158582371	158583021	91.05	73.2	355.93	intergenic	Hunk
chr1	164508078	164508528	47.16	48.72	331.05	intronic	Fam114a1
chr1	189527254	189527904	109.73	127.96	410.28	intronic	Ror1
chr1	158378538	158378948	33.05	27.61	309.25	intronic	Eif2ak4
chr1	78542804	78543382	92.41	75.78	357.41	intronic	Car12
chr1	159067289	159067739	68.46	35.75	317.31	exonic	DQ720673
chr1	195304740	195305189	63.09	110.45	390.4	intergenic	Hdac11
chr1	128820466	128820905	83.03	129.74	409.47	intergenic	Shisa2
chr1	63010885	63011281	215.56	102.09	380.74	intronic	Plcl1
chr1	38364938	38365388	134.02	168.98	446.29	intronic	AK033147
chr1	12490441	12490860	34.85	21.98	299.27	intergenic	AK133250
chr1	56458374	56458956	28.6	51.58	327.7	intergenic	L3mbtl4
chr1	40286609	40287036	49.42	40.11	315.39	intronic	BC082591
chr1	152387463	152387713	149.88	118.71	393.7	intergenic	Wapal
chr1	133564870	133565320	30.7	28.95	303.67	intronic	AK017010
chr1	38527121	38527920	91.01	57.59	332.09	intronic	Evx1
chr1	164504602	164505188	34	63.41	337.74	intronic	Oxsm
chr1	187184767	187185373	88.39	105.82	378.96	promoter	Rbms3
chr1	194819674	194820105	114.04	40.02	312.11	intronic	Gm5095
chr1	52634901	52635676	128.32	84.87	355.37	intergenic	Atpbd4
chr1	43970991	43971763	57.83	58.36	328.73	intergenic	Magi3
chr1	153478984	153479427	210.63	114.28	381.57	intronic	Krt82
chr1	55510833	55511283	135.72	97.49	364.2	intronic	Tbl1x
chr1	137551737	137552187	44.84	44.21	310.82	intronic	Gpr137b
chr1	40659920	40660542	116.11	65.82	332.17	intronic	AK029795
chr1	88121646	88122096	126.94	113.59	378.69	intronic	Tmem48
chr1	140239994	140240444	40.52	25.51	290.58	intergenic	Ptpn14
chr1	192232256	192232702	145.24	128.9	393.89	intergenic	Camsap1l1
chr1	78564607	78565039	142.95	55.76	320.22	intronic	Calcrl
chr1	156482142	156482592	36.98	32.73	295.77	intronic	Ppp3ca
chr1	120494797	120495447	79.23	86.84	349.78	intronic	H2-Q10
chr1	187071009	187071991	55.44	92.52	355.1	promoter	Ncald
chr1	45961174	45961614	151.65	108.47	371.03	intergenic	AK050197
chr1	166335411	166335844	96.38	129.94	390.29	intronic	AK007376
chr1	3662257	3662507	88.1	105.77	366.07	promoter	Thada
chr1	182288095	182288537	66.86	107.43	367.53	intronic	AK045951
chr1	108597213	108597663	99.88	169.49	428.37	intronic	Slc9a2
chr1	51804193	51804807	76.19	91.53	349.85	intergenic	AK049838
chr1	51728176	51728720	114.87	90.4	347.37	intergenic	Mat2b
chr1	56146170	56146802	72.95	66.71	323.3	intergenic	Nt5dc3
chr1	177881798	177882248	41.33	33.3	289.87	intergenic	DQ549901
chr1	137404028	137404478	53.83	59.48	315.24	intronic	Clcnkb
chr1	155552201	155552612	77.46	96.61	352.07	intergenic	Arhgap20
chr1	62641838	62642488	63.23	43.99	298.72	intronic	Afm
chr1	184426570	184427020	96.41	150.18	404.5	intronic	Casr
chr1	16232799	16233249	198.81	96.09	350.35	intronic	Pten
chr1	186270755	186271575	69.71	43.94	297.98	intergenic	Bmp6
chr1	188987317	188987909	99.65	102.12	355.58	intronic	Kif21a
chr1	183624262	183624712	80.15	63.35	316.73	intergenic	Traf3ip2
chr1	78444743	78445177	94.06	79.21	332.44	intronic	9330182L06Rik
chr1	72406817	72407238	78.18	85.58	338.8	intronic	Snx24
chr1	71931423	71931860	27.16	41.64	294.57	intergenic	Mpdz
chr1	170385332	170385982	72.95	63.96	316.4	intergenic	Rprm
chr1	5176366	5176998	30.89	29.02	281.25	intergenic	Akr1e1
chr1	172815543	172815793	115.75	100.98	352.84	promoter	Rora
chr1	174338423	174339073	27.75	33.5	285.13	intergenic	9430021M05Rik
chr1	183553046	183553696	90.95	133.38	384.63	intergenic	Tnfsf10
chr1	80394327	80394777	65.65	30.77	281.72	intergenic	Prkch
chr1	133375013	133375782	53.9	28.96	279.3	intronic	4921506M07Rik
chr1	91560359	91560809	68.57	58.96	308.19	exonic	Anln
chr1	74589196	74589645	99.82	106.47	354.89	promoter	Capza3
chr1	32744808	32745258	20.03	18.8	266.09	intergenic	Rnf150
chr1	132439026	132439568	102.24	124.64	371.87	intergenic	Tlr5
chr1	152589926	152590568	49.61	29.48	276.62	intronic	Spata13
chr1	73701511	73702161	39.73	48.98	295.28	intronic	Mgll
chr1	40251161	40251803	47.46	37.67	283.92	intergenic	Taf5l
chr1	36896790	36897040	118.27	96.72	342.61	intronic	Rtn4
chr1	71468469	71468919	68.07	138.57	383.82	intergenic	A330023F24Rik
chr1	136189048	136189498	42.94	64.6	309.6	exonic	Fbxw4
chr1	62221363	62222213	79.16	76.08	321.06	intronic	Tet2
chr1	35870328	35870958	63.85	50.68	295.14	intergenic	4933417A18Rik
chr1	88105139	88105749	62.64	68.46	312.9	intronic	AK016002
chr1	38392771	38393166	61.4	51.64	295.75	intronic	Mad2l1
chr1	180470318	180470734	34.17	37.28	281.11	intronic	Snx2
chr1	194114286	194114731	33.02	26.46	269.91	intronic	Oxtr
chr1	184523657	184524104	54.13	75.86	319.07	intronic	Lphn2
chr1	16189351	16189775	193.48	96.45	339.56	intergenic	Fam55d
chr1	99839967	99840611	47.42	44.64	287.75	intronic	Map3k7
chr1	77279502	77279952	37.57	26.2	269.05	intergenic	BC051142
chr1	184882173	184882791	42.97	80.9	323.62	intergenic	Tubgcp3
chr1	51756401	51757051	46.8	42.37	285.05	intergenic	Rasal2
chr1	159404990	159405240	145.53	95.56	337.84	intronic	AK047938
chr1	23221246	23221681	52.46	47.86	290.02	intergenic	Gm5148
chr1	189678096	189678539	83.49	86.27	328.27	intronic	Atg7
chr1	62889821	62890250	66.04	53.66	295.59	intergenic	Ttll6
chr1	52201612	52202234	74	114.13	355.94	exonic	Unc5cl
chr1	25492339	25492951	29.72	23.1	264.82	intronic	Prkce
chr1	169528392	169528842	166.45	132.27	373.38	promoter	Nck1
chr1	60802249	60802851	59.66	60.65	301.13	promoter	Trim42
chr1	34437017	34437597	66.76	85.42	324.8	intergenic	Pcsk5
chr1	191703837	191704287	84.34	147.1	384.97	intergenic	Ube2cbp
chr1	107930273	107930523	37.34	61.4	299.18	exonic	Dennd4a
chr1	195143117	195143567	28.08	42.8	280.51	intronic	Frmd4a
chr1	155406855	155407495	131.17	82.57	319.59	intergenic	Sod3
chr1	158608746	158609378	87.8	103.25	339.65	exonic	Ofcc1
chr1	56342808	56343658	60.9	48.9	283.92	intergenic	Klhl31
chr1	130353151	130354001	115.69	102.38	337.05	intergenic	Fgl1
chr1	129333669	129333919	108.49	147.5	381.95	intronic	Cyyr1
chr1	191322985	191323435	112.55	77.72	312.08	intergenic	AK140580
chr1	16230975	16231225	131.68	152.49	385.73	intronic	Slc14a2
chr1	174237856	174238462	52.49	96.1	329.18	intronic	Gm9871
chr1	89867618	89868268	40.91	26.73	259.44	intronic	AK031463
chr1	196199526	196200319	59.27	43.3	275.44	intergenic	A930017M01Rik
chr1	138222722	138222972	140.42	115.43	346.22	intronic	Phf20
chr1	173445743	173446174	58.68	87.69	318.37	exonic	Tspan33
chr1	69614975	69615557	21.17	44.21	274.64	intronic	Csnk2a1
chr1	79654978	79655574	33.78	36.06	265.96	intronic	Pparg
chr1	120539546	120539996	78.9	165.08	394.53	intronic	D19Ertd737e
chr1	190627975	190628595	55.05	27.24	256.48	intronic	Rfk
chr1	56422803	56423253	48.37	85.78	314.62	intergenic	Zfat
chr1	168113088	168113506	50.5	37.96	266.23	intergenic	Pou2f1
chr1	23191592	23192021	57.47	52.8	280.93	intergenic	Inpp5a
chr1	152763457	152764029	78.74	113.9	341.5	intronic	Sall3
chr1	61367512	61367962	23.66	34.91	262.09	intergenic	AK020061
chr1	42550654	42551092	26.71	44.44	271.39	intergenic	Fndc8
chr1	194486780	194487424	75.63	56.15	283.06	intronic	Syn2
chr1	189447805	189448455	57.11	72.63	298.64	intronic	Ablim1
chr1	79693905	79694355	82.41	87.42	313.18	intergenic	Mtnr1a
chr1	62781110	62781360	103.45	70.68	296.15	intronic	Cdh11
chr1	77176460	77176894	23.33	20.26	245.48	intergenic	Pnpla1
chr1	196813889	196814298	48.7	96.8	321.78	intronic	Bnc2
chr1	173252013	173252436	132.44	138.07	363.02	intergenic	Gapdhs
chr1	52683227	52683877	20.52	22.35	247.14	intergenic	AK003327
chr1	138889668	138890094	98.31	99.3	323.73	intergenic	Cyp2d12
chr1	89308908	89309713	61.04	41.79	265.31	intronic	Rassf6
chr1	140410627	140411068	50.5	43.71	266.79	exonic	Gm4906
chr1	43591613	43592043	82.8	108.94	331.68	intronic	AK006512
chr1	134908872	134909472	62.38	72.58	295.09	exonic	P2ry1
chr1	134097429	134097879	70.39	84.43	306.91	intronic	Gpr125
chr1	121186701	121187150	177.15	127.43	349.75	intergenic	Ttc28
chr1	5410891	5411330	18.2	17.3	239.39	intergenic	Meox1
chr1	93000084	93000716	66.3	75.59	297.57	intronic	Cyp2c40
chr1	167611417	167611862	47.23	28.46	250.13	intronic	Sipa1l3
chr1	38580190	38580840	49.35	35.67	256.98	intronic	Gm4971
chr1	35357048	35357498	62.77	75.04	296.05	intergenic	AK040904
chr1	56537287	56538065	32.5	29.17	249.86	intergenic	Lpp
chr1	180800235	180801085	81.46	69.1	289.32	exonic	BC100524
chr1	191316075	191316525	53.15	46.3	266.44	intergenic	Pld5
chr1	94255979	94256429	86.92	81.4	300.98	intergenic	Chn2
chr1	25770511	25771075	15.25	12.38	231.56	intronic	Cmah
chr1	55945034	55945284	28.44	46.21	264.74	intergenic	Strbp
chr1	24067365	24067963	36.03	35.13	253.53	intronic	Gm6924
chr1	95113752	95114202	71.41	65.83	284.16	intronic	Bach2
chr1	74231644	74232248	74.1	60.34	278.43	intergenic	AK084560
chr1	44637050	44637664	23.07	21.54	239.29	intronic	Stk32a
chr1	132530432	132530682	96.8	109.58	327.26	intergenic	Pkhd1
chr1	94902756	94903006	76.19	115.89	333.51	promoter	Immp2l
chr1	89443347	89443759	55.6	137.43	354.46	intronic	1700044K03Rik
chr1	15621172	15621786	40.61	56.08	272.9	intronic	Pdk4
chr1	155811177	155811427	65.91	78.5	294.62	intergenic	Flrt2
chr1	181803984	181804768	69.77	67.75	283.01	intergenic	Slco2b1
chr1	20613401	20613842	43.46	72.01	287.17	intergenic	Scgn
chr1	128214093	128214743	72.03	57.89	271.89	intronic	Actbl2
chr1	88173972	88174222	91.11	136.79	350.46	exonic	Ahctf1
chr1	184668125	184668957	90.46	68.18	281.61	intergenic	Gm10649
chr1	95175751	95176401	65.52	101.6	314.5	intronic	Mtdh
chr1	56351687	56351937	12.37	52.39	265.03	intergenic	Sytl2
chr1	22807099	22807545	21.73	28.93	241.43	intronic	AB338584
chr1	75056854	75057104	69.44	75.06	286.73	intronic	AK132084
chr1	55469395	55469799	49.71	84.96	296.55	intronic	Slc22a2
chr1	108223311	108223708	135.94	60.78	272.35	intronic	Txndc8
chr1	40407503	40407943	34.49	39.74	250.84	exonic	Srgap2
chr1	133952390	133952640	42.35	91.65	302.19	intronic	Ston2
chr1	140419436	140419886	26.97	27.02	237.35	intronic	Acsl1
chr1	38921031	38921472	64.41	53.28	263.27	exonic	AK133650
chr1	25887292	25887942	73.53	50.13	260.08	promoter	Ptprg
chr1	38944428	38944678	86.53	82.67	292.48	intronic	Pitrm1
chr1	140603762	140604392	42.09	30.77	240.58	intergenic	AK035124
chr1	34466716	34467151	107.87	77.76	287.52	intergenic	Klf12
chr1	195343558	195343808	39.79	45.11	254.87	intergenic	Ccdc6
chr1	189008350	189008966	42.61	67.06	276.45	intronic	Aim1l
chr1	152431555	152432005	39.67	28.43	237.61	intronic	Nck2
chr1	167979413	167979863	134.27	89.69	298.71	intergenic	Dennd2d
chr1	191673464	191673714	56.36	74.39	283.18	intronic	Syt10
chr1	62678317	62678893	44.47	48.85	257.19	intronic	Dgki
chr1	157839427	157840031	13.91	28.42	236.46	intergenic	Pak1
chr1	170341572	170342368	68.63	101.57	309.41	intronic	Elovl7
chr1	51962910	51963360	73.53	78.55	286.31	intronic	Kcnma1
chr1	69653933	69654583	37.67	45.44	252.98	intronic	Atl3
chr1	162726391	162726806	87.12	89.5	296.94	intergenic	Stac
chr1	191551171	191551421	96.28	139.1	346.38	promoter	Adrm1
chr1	34953017	34953267	62.51	46.93	254.21	intergenic	Lpcat2
chr1	38403855	38404105	21.76	17.97	224.93	intronic	Prl3a1
chr1	158451691	158452123	133.72	121.36	328.19	intergenic	Gapvd1
chr1	165827985	165828635	39.44	29.08	235.71	intronic	Dsg4
chr1	22803687	22804287	39.17	50.81	257.08	intronic	Tbc1d2b
chr1	59521485	59522089	54.78	81.94	287.86	intergenic	Skap1
chr1	144763720	144764370	44.11	29.46	235.18	intergenic	Fancd2
chr1	52558803	52559053	89.24	74.87	280.51	promoter	Fam25c
chr1	187291606	187292047	28.73	40.48	245.35	exonic	Ccdc148
chr1	180464187	180464437	69.77	123.38	328.24	intronic	Dync1i1
chr1	138001354	138001804	74.29	80	284.61	intronic	Man1a2
chr1	38411500	38411750	25.63	43.49	247.78	intronic	Nsmce4a
chr1	192959200	192959643	88.62	99.74	303.68	intergenic	Bcr
chr1	107782887	107783337	67.12	61.61	265.24	intergenic	Mpp6
chr1	88101539	88101989	35.64	33.76	237.35	intronic	1110012J17Rik
chr1	107095885	107096289	75.01	78.03	281.61	intergenic	Rplp1
chr1	180910960	180911401	45.82	32.12	235.55	intronic	Socs5
chr1	37956853	37957303	60.48	54.52	257.66	intergenic	Ppp1r12a
chr1	193341847	193342297	105.25	95.13	298.09	intergenic	Col27a1
chr1	181772722	181773150	133.17	102.02	304.9	intergenic	Frmd6
chr1	138502813	138503263	74.55	53.99	256.47	intergenic	Thbs4
chr1	76649774	76650224	28.67	34.1	236.58	intergenic	Gldc
chr1	36913952	36914394	53.38	60.7	262.85	intronic	Mkx
chr1	36857187	36857727	41.11	57.23	259.17	intronic	Cbara1
chr1	61704863	61705503	79.1	59.93	261.52	intronic	Opcml
chr1	130369008	130369458	106.56	89.5	290.89	intergenic	1700019L03Rik
chr1	34966287	34966737	44.18	34.52	235.84	intergenic	Clip1
chr1	120918807	120919257	67.78	62.68	263.61	intronic	Lonrf2
chr1	69288382	69288818	60.87	94.93	295.23	intergenic	Phactr1
chr1	94785688	94786138	54.23	75.49	275.71	intronic	AK079812
chr1	56102427	56103037	18.82	22	222.1	intergenic	Frrs1
chr1	193684876	193685312	34.53	49.64	249.64	intergenic	Fbxo31
chr1	181156439	181157031	58.91	52.09	252.07	intronic	AK006231
chr1	108117296	108117884	45.23	41.63	241.48	intronic	Otud4
chr1	155835521	155835771	101.46	118.03	317.46	intergenic	Sox6
chr1	186759380	186759630	95.6	91.53	290.58	intronic	AK017137
chr1	123367512	123367953	90.85	99.25	298.29	intronic	Tmem131
chr1	95059037	95059456	38.16	49.95	248.74	promoter	Mir130a
chr1	155499928	155500178	55.21	38.48	237.2	promoter	AK020930
chr1	152851559	152852002	37.18	37.86	236.02	intergenic	Nr3c1
chr1	25285353	25285789	95.53	50.06	247.52	exonic	Zcchc14
chr1	40770137	40770587	48.3	105.58	302.99	intronic	Thsd4
chr1	153508965	153509215	111.04	125.16	322.54	intronic	Hiat1
chr1	60194197	60194647	28.7	24.89	221.74	intronic	2210404J11Rik
chr1	82767833	82768417	67.09	53.27	250.02	intergenic	Muc16
chr1	166634826	166635462	63.75	59.54	256.18	intergenic	Mir148a
chr1	69489890	69490446	38.91	65.72	261.66	intergenic	Sufu
chr1	16040967	16041617	74.16	74.22	269.94	intergenic	Metrnl
chr1	52051921	52052499	99.56	85.78	281.49	intronic	AK017137
chr1	52740300	52740750	44.08	44.51	239.98	intronic	Lrrc36
chr1	186881345	186881778	102.53	98.16	293.14	intergenic	Lrrc55
chr1	41612411	41612839	25.59	15.1	209.89	intergenic	Loh12cr1
chr1	4051759	4052209	36.85	46.59	241.03	intergenic	Drosha
chr1	153886351	153886801	55.9	53.9	248.23	intronic	Fam23a
chr1	155554348	155554782	51.94	50.16	244.21	intergenic	Smc3
chr1	36945777	36946227	38.1	55.2	249.1	intronic	Zfp281
chr1	31091582	31091988	32.7	57.89	251.58	intergenic	Hsf2bp
chr1	130367426	130367676	42.12	59.65	253.31	intergenic	Pdxk
chr1	161100239	161100889	39.4	18.77	212.38	intergenic	BC006965
chr1	55948622	55949072	48.4	37.98	231.45	intergenic	Rab3d
chr1	145794018	145794431	45.16	66.42	259.75	intergenic	Zmym4
chr1	62999011	62999409	50.43	42.09	235.14	intergenic	Edem1
chr1	94212793	94213243	105.31	95.6	288.21	intergenic	Smurf2
chr1	57316486	57316936	23.6	37.45	229.71	intergenic	Megf6
chr1	108108436	108108986	57.31	49.6	241.37	intronic	Rasgef1a
chr1	7196712	7196962	125.01	108.76	300.03	intergenic	Efnb2
chr1	7535223	7535673	30.63	31.96	223.17	intergenic	Ppp1r3b
chr1	186986828	186987278	61.2	45.07	236.19	intergenic	Lifr
chr1	35579390	35580040	57.18	57.41	247.57	intergenic	Nhlrc3
chr1	121199202	121199452	111.14	119.67	309.63	intergenic	AK006304
chr1	190081010	190081556	80.28	73.75	263.6	intergenic	Klk1b24
chr1	129233574	129233824	43.53	68.43	258.27	intronic	AK042292
chr1	165602940	165603562	55.77	42.85	232.25	intergenic	St7
chr1	155959540	155960122	57.7	68.78	257.35	intronic	AK076963
chr1	23347059	23347474	57.93	41.94	230.31	intergenic	Gig18
chr1	43666518	43666949	35.28	44.03	231.95	intergenic	Pdlim5
chr1	128649225	128649475	66.43	74.99	261.62	intronic	Ccdc3
chr1	139524001	139524442	23.27	23.2	209.77	intergenic	Gmds
chr1	13066405	13066655	79.33	75.26	261.68	intergenic	Fads2
chr1	89293785	89294235	61.69	47.26	233.38	intronic	Ercc8
chr1	132700028	132700478	76.65	69.04	254.61	intronic	Cttnbp2nl
chr1	77383612	77383862	29.52	23.56	209.13	intronic	Gpc6
chr1	160584230	160584672	55.21	36.41	221.83	intronic	AK155516
chr1	38444276	38444721	64.63	67	252.42	intronic	Fam55d
chr1	66844102	66844552	56.98	52.35	236.84	intronic	Nfib
chr1	133324117	133324550	59.79	50.7	234.85	intronic	Brms1l
chr1	43435003	43435451	43.53	93.51	277.3	intergenic	Nr4a2
chr1	24490876	24491526	47.98	33.32	217.03	intronic	Tmem26
chr1	160584806	160585056	29.72	23.31	206.83	intronic	Bcar3
chr1	38412345	38412777	60.28	46.27	229.63	intronic	Vtcn1
chr1	153106275	153106705	67.25	41.8	224.91	intergenic	Ugcg
chr1	168006290	168006734	85.55	59.35	242.28	intergenic	Rgs8
chr1	108086397	108086847	48.4	39.08	221.82	intronic	Npvf
chr1	59544876	59545126	89.48	70.33	252.93	intergenic	Endod1
chr1	156523128	156523568	37.87	34.28	216.69	intronic	Lipi
chr1	60428032	60428474	29.81	27.61	209.86	exonic	Prkg1
chr1	69380422	69380830	19.01	22.73	204.35	intergenic	Cacna1e
chr1	151744496	151744930	50.92	35.51	217.01	intronic	Ldlrad3
chr1	9198343	9198593	23.79	22.63	203.95	intronic	AK080425
chr1	165285735	165286185	36.72	32.44	213.7	intergenic	Mtfr1
chr1	187033596	187034011	57.31	79.39	260.46	intronic	Gpr98
chr1	107561317	107561767	82.53	96.32	277.11	promoter	DQ720778
chr1	157246986	157247572	53.31	43.46	224.22	intronic	Irx2
chr1	51565397	51565836	69.97	57.12	237.37	exonic	Gstm1
chr1	82351289	82351539	28.21	21.91	202.11	intronic	Csnk1g3
chr1	34770692	34771142	56.23	60.69	240.23	intronic	Gtf3c6
chr1	54653834	54654390	71.08	84.57	264.08	intergenic	Rgs8
chr1	193900800	193901250	73.31	69.25	248.66	intronic	Cldn5
chr1	38844277	38844699	99.23	86.82	265.82	intergenic	Nfib
chr1	35987261	35987511	46.9	68.67	247.59	intergenic	Bmpr1b
chr1	181441674	181442119	48.17	64.14	243.01	intronic	Large
chr1	183593619	183594054	26.93	25.47	204.34	intronic	Plcb4
chr1	134885034	134885484	41.33	53.87	232.58	promoter	Psg17
chr1	182994846	182995247	53.02	83.02	261.23	intergenic	Foxa1
chr1	189434396	189434646	116.24	89.36	267.17	intronic	4930503E24Rik
chr1	62658560	62658966	42.38	34.82	212.16	intronic	1110028C15Rik
chr1	47113960	47114610	26.34	30.37	207.69	intergenic	Dcdc2a
chr1	189147024	189147458	90.32	103.84	281.13	intronic	Rgs2
chr1	140472827	140473248	54.79	29.82	206.79	intronic	Lmo4
chr1	23068925	23069375	29.26	11.59	188.37	intergenic	Arid1b
chr1	67089051	67089661	25.85	49.08	225.61	intergenic	Cdh26
chr1	35774433	35774880	54.65	42.45	218.91	intergenic	AK140437
chr1	187311708	187312358	27.2	44.19	220.64	intergenic	Fstl4
chr1	153533771	153534202	72.98	63.53	239.89	intronic	Prkch
chr1	31657332	31658044	27.98	20.51	196.23	intergenic	Pcm1
chr1	7035318	7035751	61.1	57.31	232.97	intergenic	Aqp4
chr1	174035202	174035852	41.79	49.51	225.16	exonic	Arrdc4
chr1	23170171	23170817	21.14	23.01	197.99	intergenic	Atg10
chr1	9651016	9651666	47.68	33.83	208.58	intergenic	Sipa1l1
chr1	122039517	122039767	45.16	28.76	203.47	intronic	Vps53
chr1	99858085	99858665	42.61	64.26	238.78	intronic	Coro2b
chr1	120813052	120813459	64.57	51.85	225.92	intronic	Mipol1
chr1	83134296	83134746	22.94	23.35	196.66	intergenic	Sema5a
chr1	177976879	177977501	67.97	52.69	225.74	intronic	Epb4.1l3
chr1	34355528	34355778	25.3	22.59	195.22	intronic	Cryz
chr1	69703479	69703926	60.18	53.21	225.71	intronic	Arap2
chr1	52773854	52774656	32.2	37.74	210.16	intronic	Celsr1
chr1	51838974	51839424	107.38	93.41	265.37	intronic	Dhrs9
chr1	193244178	193244628	96.15	76.19	247.82	intergenic	Glcci1
chr1	146112181	146112586	17.84	18.19	189.33	intergenic	Rgs6
chr1	23487719	23488167	23.96	11.43	182.53	intergenic	Krtap13
chr1	121175266	121175695	61.95	78.71	249.24	intergenic	Ugcg
chr1	78641061	78641311	53.18	66.29	236.32	intergenic	Stk4
chr1	181849762	181850212	59.07	68.81	238.75	intergenic	Agpat4
chr1	159639272	159639522	43.82	31.99	201.64	intergenic	Wwc1
chr1	76862981	76863417	41.82	54.1	223.64	intergenic	Arntl2
chr1	90800559	90801009	51.55	33.18	202.25	intergenic	Golm1
chr1	156649459	156649909	86.5	73.9	242.75	intergenic	Pfas
chr1	38365538	38365788	61.3	95.57	264.36	intronic	Dnahc9
chr1	3541254	3541904	52.43	87.72	256.33	intronic	6430548M08Rik
chr1	161181098	161181540	49.81	62.22	230.7	intronic	BC038278
chr1	193741422	193741872	39.83	86.97	255.07	intergenic	Large
chr1	51990861	51991296	45.72	38.01	205.67	intergenic	Fsd2
chr1	173716300	173716709	33.31	29.94	197.42	intronic	Ivns1abp
chr1	107777704	107777954	54.75	53.6	220.8	intergenic	Cftr
chr1	78005259	78005666	76.71	35.52	202.46	intergenic	Casp14
chr1	154640917	154641367	45.92	56.53	223.38	intergenic	Aasdh
chr1	155804828	155805278	64.11	74.57	241.19	intergenic	Ikbkg
chr1	128919603	128920031	74.49	85.29	250.65	intergenic	AK005643
chr1	130685967	130686417	81.92	68.21	233.49	intergenic	Setd2
chr1	61826423	61826925	34.46	34.18	198.97	intronic	Dsg4
chr1	58639478	58639900	55.11	58.87	223.51	intronic	Pde7b
chr1	166283606	166284027	99.19	49.16	213.73	intronic	Tprg
chr1	155927756	155928006	120.92	80.31	244.8	intronic	Nlgn1
chr1	187041764	187042310	15.74	26.5	190.7	intronic	Farp1
chr1	62994382	62994832	98.81	78.77	242.21	intergenic	Smtn
chr1	140806178	140806618	55.27	66.75	230.14	intergenic	Tiam1
chr1	90936390	90936837	57.54	77.6	240.77	intergenic	Snrk
chr1	152570263	152570713	35.12	20.56	183.62	intronic	Per3
chr1	35824258	35824846	35.35	34.7	197.68	intergenic	Tas2r119
chr1	32788878	32789528	39.47	31.94	194.77	intergenic	Tac1
chr1	165374062	165374312	49.22	54.54	217.06	intergenic	Trim42
chr1	174488916	174489166	22.29	40.76	202.96	promoter	Fmn1
chr1	136480528	136480978	37.44	38.32	200.44	intronic	Zhx2
chr1	77471642	77471892	42.9	50.24	211.93	intronic	Sh2d6
chr1	23260919	23261481	58.19	43.48	204.87	intergenic	Exoc4
chr1	62094196	62094646	65.88	69.14	230.45	intronic	Far2
chr1	151750057	151750613	27.59	31.76	192.91	intronic	St6gal2
chr1	153525117	153525653	50.43	84.18	245.19	intronic	Slc10a2
chr1	122582476	122582726	41.63	50.95	211.88	intergenic	Atp6v0d1
chr1	182945773	182946023	96.47	102.31	263.21	intronic	AK144664
chr1	140850732	140851182	47.88	40.4	201.13	intergenic	Tnip3
chr1	46943697	46944303	50.73	56.16	216.65	intergenic	Sox5
chr1	92276968	92277416	62.7	69.67	229.97	intergenic	Plcb1
chr1	43811503	43811953	69.18	56.95	217.25	intronic	Qsox1
chr1	183142659	183142909	93.59	76.59	236.6	promoter	Adig
chr1	156424118	156424568	42.81	52.34	211.91	intronic	Exoc4
chr1	79636993	79637407	59.82	52.45	211.97	intronic	Sipa1l3
chr1	184392561	184393010	57.41	57.43	216.57	exonic	Dlgap2
chr1	74508869	74509391	27.26	14.12	173.06	intronic	Acvr1c
chr1	20544530	20544936	77.62	44.79	203.63	intronic	AK018156
chr1	13235678	13236128	38.26	37.57	196.31	intronic	Pard3b
chr1	196189604	196190054	56.91	55.3	213.35	intergenic	Clint1
chr1	158991390	158991840	52.99	67.06	224.92	intergenic	Astn2
chr1	165759651	165760064	67.55	52.27	210.01	intronic	Shroom3
chr1	99518323	99518573	47.65	98.9	256.55	intergenic	Col18a1
chr1	184881484	184881734	53.51	77.12	234.76	intergenic	Gnat3
chr1	39294424	39294674	79.88	108.34	265.83	intronic	Cdkal1
chr1	5905507	5905757	74.85	63.69	221.16	exonic	Ncoa7
chr1	108305421	108305671	39.67	66.39	223.77	intergenic	Tmc3
chr1	35995909	35996358	37.51	83.39	240.67	intergenic	4732418C07Rik
chr1	155923995	155924407	81.98	78.27	235.52	exonic	Pla2g10
chr1	7430455	7430892	25.1	23.01	180.23	intergenic	Gm12824
chr1	56208441	56209025	50.69	39.27	196.35	intergenic	BC057022
chr1	155508854	155509304	84.21	83.44	240.26	intronic	AK040553
chr1	113561139	113561564	19.44	37.66	194.11	intergenic	Trp53bp2
chr1	13106336	13106786	40.32	55.69	212.07	intronic	Xpr1
chr1	22540106	22540539	88.78	43.29	199.41	exonic	AK038605
chr1	181012993	181013607	54.79	38.92	194.99	intronic	Dhcr7
chr1	145344228	145344624	27.62	21.33	177.19	intergenic	Cmah
chr1	138937692	138938142	104	62.55	217.99	intergenic	Slc16a12
chr1	167937098	167937544	53.15	61.88	217.17	intergenic	Arhgef18
chr1	133839972	133840379	43.72	51.03	206.23	intergenic	Itga11
chr1	157622941	157623191	43.72	60.04	214.65	intergenic	Cdk19
chr1	140266602	140267220	27.42	26.84	181.27	intergenic	Mir682
chr1	95973382	95973832	32.4	65.06	219.33	intergenic	LOC668917
chr1	136007032	136007471	58.84	104.36	258.56	promoter	Trank1
chr1	167612197	167612447	33.58	31.63	185.77	intronic	Mdga2
chr1	51878334	51878776	36.85	34.57	188.52	intronic	Tshz1
chr1	169168720	169169138	41.24	56.25	210.04	intronic	Adamtsl3
chr1	99866284	99866731	40.42	32.39	186.04	intronic	9130011E15Rik
chr1	173403554	173403991	75.63	81.93	235.57	intergenic	Ccdc46
chr1	138222382	138222632	124.89	59.96	213.33	intronic	Klf6
chr1	193592495	193592745	55.47	41.55	194.92	intronic	Entpd2
chr1	138238613	138239017	21.9	39.35	192.58	intronic	Vwa3b
chr1	157276825	157277250	37.6	60.31	213.26	intergenic	Trim36
chr1	77417635	77418078	27.75	27.03	179.79	intronic	Lrrc38
chr1	179918525	179918775	16.43	19.48	171.99	intronic	AK078606
chr1	88114321	88114771	48.01	61.17	213.45	intronic	Pgap2
chr1	145788660	145789061	52.82	84.53	236.8	intergenic	Fars2
chr1	153084916	153085348	48.27	59.29	210.72	intergenic	Pkhd1
chr1	52034712	52035107	42.87	33.36	184.41	intergenic	AB349192
chr1	165872121	165872527	34.79	51.31	202.33	intronic	Tpst1
chr1	171342695	171343345	29.58	23.98	174.84	intergenic	Vsig8
chr1	59742195	59742445	45.65	50.52	201.22	intronic	4921506M07Rik
chr1	79633650	79634100	53.77	40.04	190.59	intronic	Cphx
chr1	192898969	192899397	57.47	113.21	263.54	intronic	Clybl
chr1	99529450	99529871	38.85	24.23	174.28	intergenic	Cpm
chr1	34824259	34824509	53.28	28.93	178.85	intronic	Khdrbs3
chr1	193056516	193056966	28.9	36.75	186.27	intergenic	Slc26a3
chr1	156425718	156426168	49.39	64.66	214.03	intronic	Eml6
chr1	22813062	22813312	97.72	61.9	210.94	promoter	Casp3
chr1	69385012	69385462	34.76	40.04	188.73	intergenic	Mir684-2
chr1	53927192	53927442	12.08	42.14	190.62	intronic	Jmy
chr1	52524412	52524862	54.92	57.79	206.23	intronic	AK006070
chr1	137958046	137958296	63.33	86.89	235.23	intronic	Commd10
chr1	92325234	92325484	33.87	46.54	194.73	intergenic	Btg1
chr1	35401474	35401917	34.3	43.25	191.05	intergenic	Egf
chr1	162240134	162240584	69.41	53.26	200.49	promoter	Mprip
chr1	160049849	160050099	16.89	11.53	158.75	intergenic	Sidt1
chr1	157259743	157260173	60.09	62.34	209.4	intronic	Ide
chr1	66969540	66969959	83.58	43.9	190.67	intergenic	Palld
chr1	133830067	133830317	47.52	123.85	270.57	exonic	Zbtb7c
chr1	177973040	177973690	37.93	39.99	186.67	exonic	Fam46a
chr1	193283908	193284320	47.91	77.45	223.98	intergenic	Akap6
chr1	138899850	138900100	45.07	114.49	260.92	intergenic	Ppap2b
chr1	60036277	60036690	72.36	69.05	215.37	intronic	Slc38a10
chr1	161984073	161984323	76.19	75.72	221.94	intronic	Gm4850
chr1	165587061	165587833	49.71	29.5	175.71	intergenic	Vsig8
chr1	129187450	129187700	46.47	65.86	211.73	intronic	Setbp1
chr1	80005974	80006396	51.81	60.24	206.03	intergenic	BC030469
chr1	180149734	180150184	32.27	37.58	182.98	intronic	Plk1s1
chr1	16269023	16269645	58.94	35.53	180.63	intronic	Adam32
chr1	168038859	168039435	29.06	41.27	186.24	intronic	Scnn1b
chr1	83035656	83035906	88.13	45.68	190.44	promoter	Dsel
chr1	108176642	108177092	76.55	64.02	208.71	intronic	Cd3e
chr1	194123613	194123863	29.59	42.48	186.82	intronic	Ankrd10
chr1	40172368	40172817	64.41	51.86	195.58	intronic	Csrp2bp
chr1	168111092	168111506	42.48	35.74	179.24	intergenic	Elmo1
chr1	180801235	180801685	25.14	42.38	185.77	intronic	Hunk
chr1	57006714	57007290	38.62	27.66	170.97	intronic	Camsap1l1
chr1	91044245	91044677	40.65	33.75	177.05	intronic	Krt1
chr1	92009387	92009637	48.96	67.34	209.89	intronic	Arhgap18
chr1	153887751	153888201	69.31	52.5	194.85	intronic	Tdrd9
chr1	108757978	108758400	56.88	54.08	196.22	intronic	Umps
chr1	160527229	160527479	36.2	23.94	165.86	exonic	Kcnh8
chr1	14625756	14626203	22.16	22.05	163.85	intergenic	Cytl1
chr1	153709259	153709509	51.51	82.53	224.02	intronic	Slc38a9
chr1	129427669	129428093	60.18	47.77	189.21	intronic	Gig18
chr1	39022903	39023153	36.49	72.35	213.72	intergenic	Notch4
chr1	133982303	133982553	43.79	86.01	227.3	intergenic	A330035P11Rik
chr1	82147046	82147485	74.22	67.81	208.99	intergenic	AK143760
chr1	77178128	77178746	52.92	60.04	201.15	intergenic	Pde2a
chr1	155508254	155508504	65.65	96.73	237.52	intronic	Klk1b27
chr1	93553671	93553921	54.29	79.98	220.63	intergenic	Tmem117
chr1	195884690	195885135	28.15	53.05	193.41	intergenic	Mrpl42
chr1	186162407	186162989	48.96	42.01	182.34	intergenic	Ikzf2
chr1	64870969	64871372	24.81	26.91	166.93	intronic	Faf2
chr1	128019545	128020123	55.54	41.89	181.9	intronic	Fut9
chr1	59347537	59347966	83.81	50.05	190.04	intronic	Mthfd1l
chr1	146090638	146090888	25.26	24.22	163.93	intergenic	Tm9sf4
chr1	99926117	99926536	47.65	37.98	177.62	intronic	Chrd
chr1	162680743	162681154	113.3	57.68	197.32	intronic	Vps8
chr1	35418374	35418824	19.8	17.89	157.44	intergenic	Orai1
chr1	43751463	43751905	47.19	31.68	171.07	intergenic	Hnf1b
chr1	194592323	194592773	22.88	31.21	170.35	intronic	Csta
chr1	158743000	158743450	55.54	42.89	181.91	intronic	Tmem132c
chr1	64803140	64803588	55.73	41.03	179.83	intergenic	Kcnh1
chr1	184391566	184391816	45.43	34.11	172.83	intronic	Pld5
chr1	99475118	99475604	30.73	40.01	178.69	intergenic	Arid4a
chr1	78813214	78813664	58.19	65.19	203.67	promoter	Cyp2d12
chr1	24063088	24063538	36.79	27.19	165.58	intronic	Zfp957
chr1	108754016	108754266	45.59	79.47	217.8	intergenic	Plac9
chr1	162772527	162773139	53.77	37.62	175.93	intergenic	Plg
chr1	43755404	43755843	60.18	31.15	169.42	intergenic	Slc6a14
chr1	99854390	99854916	33.35	29.44	167.41	intronic	Wwox
chr1	183625262	183625512	63.75	76.12	214.02	intergenic	Fam55d
chr1	91755728	91755978	44.77	48.19	185.95	intronic	Dennd1b
chr1	71984602	71985043	61.13	45.46	182.98	intergenic	Skap1
chr1	186280600	186281108	66.89	41.42	178.89	intergenic	Btbd3
chr1	181840099	181840545	53.05	51.53	188.93	intergenic	Mrps6
chr1	172520660	172521110	66.34	47.34	184.66	promoter	Rab12
chr1	56868198	56868648	33.71	59.44	196.33	intronic	Tubgcp5
chr1	12388112	12388694	44.21	28.37	165.16	intergenic	Nos1ap
chr1	36446097	36446534	56.29	65.99	202.67	intergenic	Znrf2
chr1	146085948	146086558	26.57	40.5	177.08	intergenic	Fam114a1
chr1	129254539	129254789	57.7	76	212.55	intronic	Parm1
chr1	80230030	80230480	24.41	39.94	176.41	intergenic	Prdm14
chr1	153462830	153463476	35.25	40.96	177.34	intronic	Nova1
chr1	182995485	182995929	73.73	57.07	193.38	intergenic	Prdx6-rs1-ps
chr1	154568576	154569220	68.79	45.76	181.93	intergenic	AK083054
chr1	109838903	109839353	55.44	36.75	172.48	intronic	Fat1
chr1	93153251	93153666	21.11	49.3	185.02	intronic	Asap1
chr1	167685302	167685946	28.47	28.46	164.15	intergenic	Mrps33
chr1	39161091	39161541	41.4	59.48	195.11	intergenic	Pou6f2
chr1	154598140	154598578	49.97	48.53	183.97	intronic	Wac
chr1	194119760	194120210	48.08	46.87	182.08	intronic	Slc45a4
chr1	51858772	51859374	30.17	15.17	149.99	intronic	A830010M20Rik
chr1	159528334	159528784	52.53	67.13	201.88	intergenic	Tcerg1
chr1	151733882	151734282	40.81	25.58	160.32	intronic	E130304I02Rik
chr1	175339264	175339514	46.6	82.57	217.01	intergenic	Ccdc64
chr1	71292344	71292794	62.24	51.23	185.53	intronic	Nwd1
chr1	89202177	89202585	31.25	23.16	157.41	intronic	Rora
chr1	140404562	140405012	92.94	40.25	174.32	intronic	Atp6v1g3
chr1	38425697	38426147	45.19	50.92	184.84	intronic	AK039836
chr1	87711334	87711584	20.65	31.86	165.74	intronic	1700030F18Rik
chr1	23272454	23272704	33.71	38.82	172.61	intergenic	Rassf6
chr1	168019910	168020160	69.68	93.97	227.73	intergenic	Mkl2
chr1	12391650	12391900	11.98	4.95	138.67	intergenic	BC064078
chr1	51872532	51872782	63.06	48.77	182.18	intronic	Abcc1
chr1	37652244	37652658	59.14	70.56	203.89	intergenic	Fzd5
chr1	158749734	158750168	90.49	47.02	180.1	exonic	Arhgap39
chr1	95173275	95173525	57.7	90.98	223.93	exonic	Tbc1d1
chr1	99944321	99944571	43.46	85.32	218.19	promoter	Cdh26
chr1	157771931	157772181	51.51	43.77	176.55	intronic	Hlx
chr1	171988196	171988646	87.38	37.84	170.45	intronic	Arglu1
chr1	51920445	51920895	48.53	33.33	165.88	intronic	AK079018
chr1	61919828	61920265	23.04	14.53	147.02	intronic	Stac
chr1	34371660	34371910	33.71	27.67	160.01	intergenic	AK143760
chr1	38087047	38087447	19.11	12.01	144.28	intronic	Ifitm3
chr1	66947567	66947817	50.4	62.12	194.3	intergenic	Tmx1
chr1	166042211	166042661	60.78	41.74	173.5	intergenic	Cdc14a
chr1	109813581	109813998	36.32	11.61	143.34	promoter	Zfc3h1
chr1	34297369	34297619	31.91	46.38	177.93	intronic	Rora
chr1	5219070	5219320	33.38	25.81	157.13	intergenic	AK033051
chr1	177537997	177538447	68.95	57.26	188.46	exonic	Capza3
chr1	38548425	38548675	17.41	12.91	143.87	intronic	Fam124b
chr1	78827975	78828597	49.32	46.21	177.15	intergenic	B3galt5
chr1	88495739	88496189	28.73	36.44	167.37	exonic	Mylip
chr1	41867118	41867566	41.13	28.45	159.08	intergenic	Slc38a2
chr1	140487235	140487673	35.38	25.93	156.55	intronic	Txndc11
chr1	178008117	178008555	37.08	35.69	166.26	intronic	Gmds
chr1	169684256	169684705	46.64	41.06	171.6	intronic	AK005410
chr1	37138629	37138879	61.79	75.71	205.91	intergenic	Arid1a
chr1	168135297	168135547	25.92	21.04	151.2	intronic	Sec16b
chr1	67593073	67593323	13.58	17.24	147.34	intergenic	Mex3c
chr1	157797877	157798270	19.96	13.88	143.7	intronic	Tesk2
chr1	95974782	95975232	44.31	25.04	154.74	intergenic	Tpcn2
chr1	178012525	178012775	32.47	20.79	150.19	intronic	Flna
chr1	184288312	184288562	66.31	54.66	183.86	intergenic	Pde8b
chr1	133385850	133386284	57.04	53.79	182.98	intronic	AK080425
chr1	184336798	184337215	37.63	80.36	209.54	intergenic	Sepp1
chr1	78837400	78837834	19.83	25.3	154.31	intergenic	Pmp2
chr1	169481739	169482184	55.99	41.26	170.19	intergenic	Fzd8
chr1	40278725	40279175	55.61	35.92	164.82	intergenic	DQ687660
chr1	156898142	156898576	30.73	56.98	185.58	intergenic	Lrba
chr1	52882968	52883391	28.83	31.18	159.6	intergenic	Add3
chr1	140240594	140241044	34.49	14.39	142.33	intergenic	Gcom1
chr1	181340881	181341331	43.27	32.81	160.43	intronic	Mecom
chr1	42938698	42939506	57.08	43.07	170.66	exonic	Tgfa
chr1	88547832	88548404	43.4	50.46	178.02	intergenic	BC048761
chr1	55954856	55955296	26.97	17.95	145.5	intergenic	Akap11
chr1	37664788	37665200	45.59	71.93	199.33	intergenic	Sash1
chr1	181954560	181955002	50.63	34.4	161.71	exonic	Gpbp1
chr1	153531439	153531889	57.07	38.48	165.67	intronic	Satb2
chr1	67441015	67441451	44.96	32.52	159.43	intergenic	Wnk2
chr1	145487605	145488225	44.54	23.14	149.94	promoter	4732471J01Rik
chr1	74354631	74355071	46.14	33.74	160.37	intronic	Rxrg
chr1	121314763	121315013	45.23	37.87	164.29	intronic	2010111I01Rik
chr1	139479601	139480147	40.84	32.32	158.51	intergenic	AK133250
chr1	55944234	55944484	46.18	86.53	212.56	intergenic	AK134047
chr1	146044854	146045104	35.57	57.19	183.18	intergenic	AK080657
chr1	194198000	194198447	54.29	54.33	180.27	intronic	Nupl2
chr1	78812326	78812776	25.63	19.63	145.56	promoter	Zbtb38
chr1	137412572	137412822	25.46	30.25	155.93	intronic	Nicn1
chr1	38534985	38535429	38.71	27.9	153.46	intronic	Mir802
chr1	179704610	179705050	64.3	53.53	179.04	exonic	Pdzk1ip1
chr1	62628962	62629550	29.85	36.88	162.27	intronic	1700108F19Rik
chr1	67047102	67047504	49.97	41.97	167.34	exonic	Tpm1
chr1	120872074	120872478	71.87	32.82	158.03	intronic	Slc2a13
chr1	38426297	38426547	26.05	22.38	147.34	intronic	Exoc4
chr1	193619967	193620567	40.32	74.52	199.3	intergenic	Rusc2
chr1	52821911	52822361	39.96	35.8	160.22	intergenic	Kidins220
chr1	44604215	44604632	26.87	16.94	141.05	intergenic	1110002L01Rik
chr1	189435931	189436181	83.12	62.64	186.67	intronic	Slc8a1
chr1	121342957	121343207	50.79	44.71	168.57	intergenic	2310008H04Rik
chr1	40314835	40315239	27.85	30.47	154.09	intronic	Gm5095
chr1	39337848	39338098	34.76	61.94	185.55	intronic	Fert2
chr1	38514884	38515134	22.58	12.09	135.61	intronic	Myo1b
chr1	58478198	58478632	37.96	42.9	166.39	exonic	Tcfap2c
chr1	19883332	19883782	17.41	18.93	142.34	intergenic	Birc6
chr1	69371433	69371835	9.82	13.36	136.49	intergenic	Cdc42ep4
chr1	51991601	51992036	51.97	41.61	164.66	intergenic	Foxp2
chr1	13161145	13161584	58.22	38.18	161.07	intronic	Nudcd1
chr1	159485028	159485469	82.17	52.28	175.04	intronic	Exoc5
chr1	57262328	57262578	46.01	58.73	181.46	intronic	Bckdhb
chr1	60668892	60669142	42.48	82.7	205.3	intergenic	Zbtb16
chr1	181865472	181865899	56.91	46.32	168.6	intergenic	Slc24a3
chr1	82231739	82232179	42.51	26.38	148.57	exonic	Fgd6
chr1	172776150	172776600	38.75	20.13	141.75	intronic	Ccny
chr1	54724685	54725117	28.73	76.07	197.68	intronic	Trim2
chr1	59501993	59502243	75.66	47.98	169.39	intergenic	AK042292
chr1	140826714	140826964	63.52	64.4	185.66	intergenic	Zc3h3
chr1	43846917	43847167	53.21	48.45	169.44	intronic	Pak2
chr1	138190493	138190896	16.33	16.2	137.15	exonic	Mex3c
chr1	95283718	95284168	66.34	70.47	191.32	exonic	Herc4
chr1	99910739	99911146	36.03	23.46	144.31	intronic	AK156148
chr1	35636351	35636601	18.88	21.16	141.94	intergenic	Fam134b
chr1	183558577	183558998	50.63	39.28	159.89	intergenic	Myo6
chr1	99894541	99894940	28.67	17.83	138.34	intronic	Eif2b3
chr1	192243683	192243933	54.72	75.47	195.71	exonic	Hspa12a
chr1	152762466	152762716	42.18	34.11	154.23	intronic	Pitpnc1
chr1	56598554	56599004	41.69	48.04	167.86	intergenic	Cux1
chr1	138354888	138355138	46.74	49.63	169.23	intergenic	Enpp6
chr1	75333515	75333765	15.58	31.68	151.19	intergenic	Creb3l1
chr1	189878904	189879351	59.5	52.86	172.36	intronic	Ccdc57
chr1	152791822	152792255	40.19	27.69	147.14	intronic	AK043922
chr1	129673027	129673475	43.79	64.37	183.29	intronic	Dcn
chr1	57041029	57041279	46.57	22.37	141.14	intronic	Cacna1e
chr1	66233105	66233517	50.89	29.8	148.04	intronic	AK083230
chr1	36940554	36940991	57.93	65.28	183.24	intronic	Baz2b
chr1	127366605	127367055	21.96	16.38	133.99	intergenic	Osbpl10
chr1	156866602	156867041	31.94	41.79	159.36	intergenic	Zfp532
chr1	140853194	140853444	27.39	40.77	158.29	intergenic	Gas5
chr1	172576517	172576767	49.29	46.74	164.17	intronic	Chrdl2
chr1	189252557	189252807	72.19	54.93	172.31	intergenic	Tln2
chr1	174488538	174488788	51.25	78.9	196.19	promoter	Golph3
chr1	44641620	44642270	42.41	33.01	150.19	intronic	AK170409
chr1	95583454	95583704	34.89	79.98	196.92	intronic	Prkg1
chr1	170310328	170310578	39.63	87.82	204.72	intronic	Cnnm2
chr1	151742140	151742390	33.84	22.12	138.97	intronic	Galntl6
chr1	156427118	156427568	45.13	43.66	160.36	intronic	Znrf3
chr1	162963917	162964167	70.89	42.27	158.95	promoter	Slpi
chr1	93616735	93617185	40.19	68.78	185.33	intergenic	Dnaja4
chr1	67430687	67431058	23.14	18.93	135.46	intergenic	AK143085
chr1	172724550	172724974	30.17	41.52	158.02	exonic	Slfn8
chr1	56217250	56217661	20.62	21.42	137.66	intergenic	Trhr
chr1	47223856	47224106	13.42	7.97	124.18	intergenic	Tbc1d10c
chr1	37098894	37099144	58.84	61.13	177.32	exonic	Mccc1
chr1	158742000	158742250	52.82	69.07	185.22	intronic	Tlk1
chr1	173399939	173400189	32.2	50.07	166.12	intergenic	Narg2
chr1	152627115	152627365	49.35	43.9	159.93	intronic	AB338584
chr1	169317933	169318183	26.21	61.62	177.63	intronic	Arrdc4
chr1	13108998	13109248	54.36	68.03	184.03	exonic	Bcas3
chr1	189675003	189675499	21.14	17.94	133.74	intronic	Tbcel
chr1	69414137	69414569	22.75	40.84	156.56	intergenic	AK002929
chr1	38414844	38415094	28.9	30.39	145.76	intronic	AK042990
chr1	128822074	128822324	53.9	62.27	177.62	intergenic	Kctd12
chr1	181510484	181510734	47.03	38.44	153.16	exonic	Nav1
chr1	6970602	6971052	43.39	19.62	134.16	intergenic	Smad5
chr1	35871468	35871908	60.94	28.34	142.82	intergenic	Ptpn22
chr1	58086659	58086909	55.83	37.81	152.06	promoter	Mir760
chr1	37035773	37036023	14.11	33.28	147.45	intergenic	Nlgn3
chr1	13160081	13160463	22.06	24.34	138.47	intronic	Lphn2
chr1	51561025	51561415	21.8	25.43	139.28	intergenic	S100a2
chr1	140870225	140870475	37.73	30.38	144.11	intronic	Atg2b
chr1	9849324	9849574	30.86	28.5	141.52	intronic	Dennd2a
chr1	196134668	196134918	28.99	62.29	175.29	intergenic	Glrx3
chr1	186226886	186227136	66.43	51.11	164.04	intergenic	Vipr2
chr1	154977499	154977749	35.47	46.77	159.67	intronic	Fat2
chr1	119449164	119449414	16.2	11.79	124.56	intergenic	Nedd9
chr1	129799568	129799818	25.26	52.03	164.72	intronic	Tcf12
chr1	187006254	187006685	25.63	38.82	151.51	intergenic	Rere
chr1	195334524	195334774	41.53	21.77	134.37	promoter	Sox6
chr1	62963871	62964121	11.95	18.06	130.62	intergenic	AK051417
chr1	14719073	14719523	38.65	23.82	136.37	intergenic	Wisp3
chr1	32747871	32748121	11.98	10.39	122.92	intergenic	Psd3
chr1	62081900	62082150	36.49	38.86	151.23	intronic	AK033508
chr1	167608280	167608530	49.75	47.86	160.11	intronic	BC070425
chr1	77078970	77079410	61.33	48.97	161.21	intergenic	Cdc7
chr1	180268318	180268568	32.17	18.85	131.02	promoter	Cftr
chr1	133206249	133206699	36.27	29.57	141.58	intronic	Serinc5
chr1	186277407	186277843	52.23	37.66	149.39	intergenic	Lass6
chr1	129000324	129000774	32.37	28.59	140.32	intergenic	Tbca
chr1	61208675	61208925	35.34	22.06	133.65	intergenic	Gm10790
chr1	145405573	145405823	15.02	45.1	156.65	intergenic	Myo10
chr1	62262549	62262799	33.55	21.88	133.19	intronic	Tas2r143
chr1	195305745	195306195	29.78	47.76	159	intergenic	Zfp148
chr1	22282770	22283217	39.37	35.25	146.44	exonic	Magi3
chr1	62400638	62401052	31.25	32.45	143.44	intronic	G2e3
chr1	58421507	58421929	20.09	15.97	126.9	intronic	Crygs
chr1	5214874	5215316	35.12	25.19	136.08	intergenic	St3gal1
chr1	51019198	51019448	28.38	23.7	134.57	intronic	Zbtb25
chr1	56207709	56208117	21.4	9.7	120.54	intergenic	Rbm5
chr1	184281241	184281491	28.18	30.01	140.71	intergenic	Egfr
chr1	52785709	52786146	28.47	36.85	147.53	promoter	AK043581
chr1	37027592	37027842	47.72	54.04	164.71	intergenic	Psd3
chr1	38930725	38931126	59.73	50.86	161.36	exonic	Zfp618
chr1	52846866	52847315	54.46	36.64	147.07	exonic	Ptplb
chr1	137292568	137293142	35.9	47.07	157.46	intronic	Arhgap12
chr1	51895534	51895784	49.09	83.28	193.53	intronic	AK029692
chr1	36927749	36927999	50.07	37.45	147.41	intronic	Zfp619
chr1	132463440	132463690	59.37	61.9	171.78	intergenic	Fancl
chr1	16218815	16219065	39.7	37.04	146.9	exonic	Abr
chr1	184390969	184391418	47.75	37	146.82	intronic	Ppcdc
chr1	55315735	55316179	25.46	22.43	132.24	intergenic	Stard8
chr1	36036770	36037157	52.95	41.22	151.01	intergenic	Ehd4
chr1	61454767	61455191	58.35	42.4	152.09	intergenic	AK017239
chr1	35578990	35579240	22.39	15.81	125.44	intergenic	AK079754
chr1	177453866	177454116	62.41	44.07	153.52	intergenic	Ano10
chr1	129799168	129799418	9.98	15.21	124.65	intronic	Fam55d
chr1	88099835	88100085	34.24	24.38	133.74	intronic	Itga9
chr1	77222236	77222486	28.83	54.5	163.71	intergenic	Mettl13
chr1	42365335	42365754	35.54	28.1	137.24	intergenic	Mllt3
chr1	155751131	155751557	45.39	24.88	134.02	intronic	Atp12a
chr1	130609501	130609751	65.55	36.61	145.69	intergenic	Trpm1
chr1	47027332	47027742	48.57	54.04	163.1	intergenic	Fndc3b
chr1	36966809	36967212	38.65	51.78	160.66	intronic	AK139864
chr1	178154680	178155119	39.44	29.2	137.86	intronic	Sarnp
chr1	40279325	40279775	61.46	38.01	146.46	intergenic	St18
chr1	153117996	153118246	60.54	41.3	149.63	intergenic	Casp3
chr1	123401027	123401277	20.65	47.96	156.08	exonic	Zc3h18
chr1	62679666	62679916	24.97	23.16	131.22	intronic	Trp53bp2
chr1	66822487	66822891	49.94	26.23	134.05	intronic	AK010245
chr1	157038590	157038840	78.58	51.89	159.63	exonic	Vwc2
chr1	31380160	31380758	24.71	29.35	136.97	intergenic	1810013D10Rik
chr1	22633795	22634180	20.52	21.75	129.31	intronic	Atl1
chr1	23194709	23194959	44.21	41.31	148.71	intergenic	Tesk2
chr1	80411991	80412241	34.3	21.15	128.46	intergenic	2610203C20Rik
chr1	162734148	162734730	43.63	41.74	148.99	intergenic	Igf2bp2
chr1	132600268	132600518	30.27	13.72	120.92	intronic	Fbxw2
chr1	37548433	37548854	56.03	66.56	173.75	intronic	Eif3c
chr1	40930718	40930968	41.76	66.41	173.29	intergenic	Herpud2
chr1	164828109	164828359	69.09	35.88	142.66	exonic	Slc35f3
chr1	39374821	39375071	38.69	45.64	152.35	intronic	Tpst1
chr1	69704574	69704983	45.78	33.08	139.65	intronic	Hmgcs2
chr1	55450879	55451129	51.25	39.87	146.44	intergenic	Gpd1l
chr1	20301630	20301880	23.83	23.83	130.38	intronic	Hmgb1
chr1	40325162	40325584	48.27	28.85	135.35	intronic	Gata6
chr1	71622722	71623142	40.48	31	137.35	intronic	Bri3
chr1	16239712	16240129	66.21	47.36	153.63	intronic	AK076733
chr1	20547892	20548324	21.01	23.58	129.85	intronic	AK028549
chr1	78367307	78367743	46.9	55.82	162.08	intronic	Pam
chr1	123386022	123386272	30.31	43.08	148.86	intronic	AK085274
chr1	21042220	21042470	42.81	77.62	183.23	intronic	Stt3b
chr1	64713579	64714013	16.36	28.29	133.89	intergenic	Traf3ip2
chr1	179570555	179570805	49.02	77.13	182.71	intergenic	Bcl2l1
chr1	140411925	140412417	38.68	32.98	138.39	exonic	Dgka
chr1	121205268	121205518	53.77	73.71	179.11	intergenic	Stard13
chr1	16231367	16231617	65.88	46.52	151.57	intronic	Plxnc1
chr1	156128668	156128918	56.81	34.55	139.54	intergenic	Oxsm
chr1	140172408	140172858	52.75	34.12	139.1	intronic	AK017137
chr1	90938761	90939011	34.4	24.7	129.62	intergenic	Atp6v1g3
chr1	53684587	53684837	38.42	34.63	139.12	intergenic	Cux1
chr1	51803046	51803467	51.18	31.96	136.4	intergenic	Arhgef38
chr1	82871811	82872203	55.08	37.13	141.56	exonic	Aldh1a3
chr1	62229231	62229667	27.1	26.64	131.07	intronic	1110003E01Rik
chr1	181998491	181998932	23.53	16.39	120.65	intronic	Pou2af1
chr1	34540383	34540789	32.2	37.24	141.46	intronic	Ube2v1
chr1	67529177	67529607	23.37	23.99	128.18	intergenic	Hc
chr1	51808072	51808322	56.48	38.99	143.1	exonic	Fam19a1
chr1	140427389	140427639	43.85	39.12	143.09	intronic	Asap1
chr1	53951650	53951900	67.12	49.37	153.33	intronic	Tmem56
chr1	22544880	22545450	43.72	30.27	134.21	exonic	Arl4a
chr1	152480271	152480521	38	27.16	130.96	intronic	Nedd9
chr1	153477053	153477533	58.97	30.53	134.24	intronic	4933403G14Rik
chr1	79995675	79996062	74.22	44.04	147.51	intergenic	Il33
chr1	57261737	57262184	56.42	35.14	138.55	intronic	Pus10
chr1	191403420	191403670	63.43	49.28	152.6	intergenic	AK045700
chr1	31072604	31072854	16.72	13.61	116.82	intergenic	Uvrag
chr1	52882622	52882872	8.74	9.03	112.16	intergenic	Eml4
chr1	137970984	137971234	45.82	62.76	165.83	intronic	Akr1e1
chr1	136199415	136199665	39.93	35.54	138.52	intronic	Lphn2
chr1	152957652	152957902	46.08	51.15	153.82	intergenic	AK087886
chr1	6897242	6897492	29.78	31.3	133.82	intergenic	AK087755
chr1	46187242	46187492	28.64	26.49	128.61	intronic	Slc4a4
chr1	99847140	99847582	29.49	30.18	132.11	intronic	Arhgap44
chr1	167918859	167919109	51.15	32.85	134.6	intronic	St14
chr1	62842841	62843091	67.09	45.91	147.57	exonic	AK079921
chr1	64051834	64052084	54.98	36.11	137.63	intergenic	Shisa9
chr1	129292961	129293211	51.12	70.6	172.1	intronic	Tspan14
chr1	52558019	52558269	46.34	33.01	134.4	promoter	Col24a1
chr1	63724742	63724992	27.91	54.28	155.65	intronic	Golga3
chr1	136141471	136141721	45.95	56.69	158.05	intergenic	AK015395
chr1	160285377	160285627	46.48	30.66	131.96	intronic	Clock
chr1	152927964	152928214	28.34	18.89	120.12	intergenic	AK144632
chr1	21289036	21289286	23.79	25.03	126.22	promoter	Car2
chr1	93616156	93616583	41.96	43.33	144.35	intergenic	Itga8
chr1	140432317	140432708	23.01	17.4	118.36	intronic	Wdr44
chr1	99980663	99980913	14.11	35.16	136.1	intronic	D130009I18Rik
chr1	20853527	20853777	52.33	47.99	148.77	intergenic	Rbms3
chr1	177887509	177887923	43.49	37.59	138.32	intergenic	Farp1
chr1	191489830	191490280	44.9	34.98	135.69	intronic	Rora
chr1	88100235	88100485	50.07	64.95	165.66	intronic	Rnf180
chr1	59786948	59787385	55.7	30.15	130.85	intergenic	Snhg11
chr1	6500145	6500395	65.19	46.78	147.47	intronic	Mllt3
chr1	156052368	156052618	47.29	37.77	138.42	intergenic	Gm5095
chr1	166450266	166450874	31.42	31.81	132.33	intergenic	Tbc1d1
chr1	133598916	133599166	38.39	43.33	143.71	intronic	Tex2
chr1	64331215	64331642	17.02	39.63	139.92	intergenic	Gpr143
chr1	166250708	166251152	51.84	34.36	134.55	intronic	Chd9
chr1	25868355	25868805	18.88	16.63	116.74	intronic	Gpd1l
chr1	45950923	45951373	22.19	25.99	126.04	intergenic	Paip1
chr1	191556064	191556481	49.84	32.79	132.81	intronic	Baat
chr1	164477769	164478019	56.91	48.63	148.55	intronic	AK149453
chr1	64236078	64236328	62.18	48.43	148.3	intergenic	Dnajc5b
chr1	190927945	190928435	25.49	26.22	125.98	intergenic	Herc6
chr1	42907479	42907729	46.11	44.07	143.79	promoter	Aldoart1
chr1	57566725	57567162	45.95	29.65	129.32	intergenic	Eif3h
chr1	168082081	168082331	36.03	62.08	161.68	intronic	Samd12
chr1	32779940	32780190	12.96	11.24	110.75	intergenic	Anapc7
chr1	153708547	153708797	42.45	30.76	130.22	intronic	Nab1
chr1	34021626	34021876	47.55	47.25	146.65	intronic	AK035406
chr1	168006872	168007122	46.93	40.73	140.05	intergenic	Pskh1
chr1	188979617	188979867	32.37	20.94	120.18	intronic	AB345949
chr1	121486582	121486991	43.56	27.85	126.97	intronic	Fryl
chr1	51725779	51726029	57.8	41.74	140.81	intergenic	AK040104
chr1	33079752	33080139	30.96	22.93	121.91	intergenic	Tbl1x
chr1	60860942	60861354	41.76	57.74	156.67	intergenic	Fgfr2
chr1	77035514	77035924	26.97	23.34	122.16	intergenic	Scnn1b
chr1	178055733	178055983	21.86	20.91	119.69	intronic	Mll1
chr1	182059112	182059362	28.11	14.85	113.51	intronic	9230115E21Rik
chr1	59334825	59335075	40.06	30.34	128.91	intronic	AK043690
chr1	58418546	58418918	32.14	67.29	165.81	intronic	Samd5
chr1	144995684	144996127	21.01	16.64	114.98	intergenic	Mier3
chr1	37715034	37715464	22.55	29.5	127.78	intronic	Rtn4
chr1	157690781	157691031	39.5	73.11	171.23	intergenic	Gnaq
chr1	192993288	192993669	23.33	37.58	135.56	intergenic	AK019604
chr1	138756331	138756581	45.46	47.05	144.92	intronic	Nrd1
chr1	154551089	154551524	44.71	33.01	130.52	intergenic	Olfr835
chr1	186095918	186096365	28.64	28.77	126.23	intergenic	Swap70
chr1	71156513	71156763	27.56	40.92	138.23	intergenic	St6gal1
chr1	140489223	140489656	53.8	37.12	134.19	intronic	Mtus1
chr1	15643007	15643257	41.2	42.47	139.53	intronic	Esyt3
chr1	156035810	156036060	56.29	43.72	140.72	intergenic	BC023070
chr1	16250594	16251010	46.83	39.55	135.97	intronic	Bcas3
chr1	58958982	58959362	55.47	34.42	130.84	exonic	4933426M11Rik
chr1	36291810	36292247	59.76	48.39	144.64	intronic	Npepps
chr1	19842890	19843140	14.17	16.9	113.08	intergenic	DQ713846
chr1	83156580	83156830	70.39	28.62	124.77	intronic	Rims2
chr1	53798743	53798993	48.76	51.66	147.48	intergenic	Cdc14a
chr1	19629481	19629931	27.33	16.98	112.59	intergenic	Ccdc123
chr1	155865358	155865755	50.73	38.31	133.81	intergenic	Adam12
chr1	193287238	193287730	26.77	24.69	120.19	intergenic	Lmbr1
chr1	22653362	22653770	32.3	16.92	112.18	intronic	Cdk15
chr1	45887673	45887923	34.33	21.5	116.74	intergenic	Rpusd4
chr1	139788428	139788946	12.86	17.1	112.33	intergenic	Ino80
chr1	181664977	181665227	55.31	38.99	134	intergenic	AK162386
chr1	36226021	36226271	32.21	30.68	125.56	intronic	Htr3a
chr1	140167209	140167459	20.36	21.78	116.43	intergenic	AK016251
chr1	25827382	25827809	28.37	19.56	114.18	intronic	Mex3c
chr1	151769575	151769825	48.04	48.55	143.16	intronic	Nupl1
chr1	24553982	24554232	23.2	14.87	109.36	intronic	Arhgap24
chr1	38415244	38415494	31.55	29.32	123.61	intronic	Zfp521
chr1	178856138	178856388	36.55	43.58	137.57	intronic	Immp2l
chr1	57040429	57040679	31.35	19.81	113.72	intronic	Slc5a4b
chr1	174477279	174477650	35.38	35.87	129.26	intronic	Gm4956
chr1	185961331	185961748	34.75	26.03	119.38	intergenic	9130404H23Rik
chr1	3662657	3662907	36.42	44.14	137.45	promoter	Scn3b
chr1	82630953	82631384	68.76	30.81	123.72	intronic	AK077272
chr1	99834725	99834975	35.54	33.75	126.61	intronic	Slc25a21
chr1	15651383	15651824	34.89	32.75	125.51	intronic	Lass4
chr1	154634742	154634992	31.15	42.15	134.9	intergenic	Zfp521
chr1	99768630	99768880	13.55	9.42	102.1	intronic	Kcnb2
chr1	78598115	78598365	44.77	38.53	131.19	intronic	Ctage5
chr1	55949945	55950195	30.11	19.58	112.03	intergenic	Commd10
chr1	179908422	179908814	46.18	39.67	132.08	intergenic	Smoc2
chr1	61913867	61914317	67.05	24.79	116.91	intronic	Tnfrsf26
chr1	182448640	182448890	36.92	45.54	137.64	intergenic	Abhd12b
chr1	108135360	108135810	27.49	18.22	110.29	intronic	9530008L14Rik
chr1	169517974	169518386	41.69	31.7	123.77	intergenic	Rpl17
chr1	128824859	128825109	34.92	36.2	128.16	intergenic	Spag5
chr1	68767142	68767583	22.06	15.79	107.69	intronic	Lrguk
chr1	157471418	157471868	34.07	34.41	126.11	intronic	Muc4
chr1	75094738	75094988	31.78	30.53	122.18	intronic	Rorb
chr1	184805803	184806251	42.94	28.73	120.32	intronic	Oprm1
chr1	34133917	34134167	53.84	44.75	136.32	intronic	Acvr2a
chr1	108523882	108524132	32.07	18.78	110.35	intronic	Ednrb
chr1	174098938	174099365	25.92	20.78	112.33	intronic	Hrsp12
chr1	158737104	158737524	53.12	40.25	131.71	exonic	Lrriq3
chr1	138326141	138326391	38.78	49.02	140.4	intronic	AY512908
chr1	62952345	62952733	48.01	33.21	124.54	intergenic	Erc2
chr1	182829724	182830174	32.89	25.37	116.7	intergenic	Gpr20
chr1	135360008	135360258	53.41	48.23	139.5	intergenic	Ifng
chr1	140252971	140253392	20.91	10.61	101.83	intergenic	AK029404
chr1	173443931	173444181	29.91	46.25	137.28	promoter	C1galt1
chr1	165128898	165129317	77.89	35.07	126.1	intergenic	Mprip
chr1	123187074	123187324	32.47	42.49	133.44	intergenic	Sestd1
chr1	167034959	167035209	43.79	37.11	128.04	intergenic	Zfp521
chr1	169685251	169685501	47	36.86	127.7	intronic	Gtpbp4
chr1	52741100	52741550	52.95	36.79	127.57	intronic	Khdrbs2
chr1	167025359	167025609	48.01	35.48	126.21	intergenic	Rgs6
chr1	32989953	32990395	13.06	12.73	103.45	intergenic	Ywhaz
chr1	186264671	186264921	23.33	57.49	148.02	intergenic	Adam17
chr1	31951995	31952445	19.73	14.51	104.98	intergenic	Bach1
chr1	13237405	13237819	34	25.52	115.95	intronic	Abcc5
chr1	145850519	145850769	36.42	48.99	139.36	intronic	Timp2
chr1	166820435	166820685	48.17	43.64	133.81	intergenic	AK199184
chr1	173205427	173205833	13.94	21.55	111.7	intronic	Epha4
chr1	94891361	94891811	39.37	39.06	129.16	promoter	Snx30
chr1	108098751	108099001	49.35	39.95	130.02	intronic	Kcnj2
chr1	165681602	165682008	38.42	23.45	113.52	intergenic	Tfdp2
chr1	40934891	40935314	37.47	29.67	119.73	intergenic	Ipo5
chr1	156627032	156627282	33.38	29.97	119.93	intergenic	BC120798
chr1	82816870	82817120	31.71	52.32	142.12	intergenic	Setbp1
chr1	24679344	24679824	18.26	18.69	108.43	intergenic	AK039836
chr1	137680503	137680940	23.37	36.18	125.81	intronic	Mcee
chr1	40300339	40300754	27.56	25.7	115.3	intronic	B3galt5
chr1	183557339	183557704	38.68	36.53	126.1	intergenic	Tmc5
chr1	99976200	99976632	19.8	15.81	105.32	intronic	Tmem135
chr1	184669483	184669927	36.98	27.36	116.69	intergenic	Bmp15
chr1	162434886	162435336	28.11	26.42	115.56	intronic	AK020793
chr1	155648842	155649259	15.64	17.16	106.16	intronic	Rapgef5
chr1	168041084	168041522	48.93	49.82	138.73	intronic	1700007G11Rik
chr1	89797752	89798002	44.44	59.78	148.62	intronic	Tmc3
chr1	6966207	6966457	23.83	19.03	107.58	intergenic	Susd4
chr1	157713447	157713825	29.42	20.28	108.48	intronic	Greb1l
chr1	169145822	169146252	47	51.89	140.04	intergenic	Anxa10
chr1	136315600	136316050	29.39	41.89	129.83	intronic	Gtsf1
chr1	153443127	153443377	29.78	30.47	118.41	intronic	Gnal
chr1	43341709	43341959	31.74	49.83	137.76	intergenic	Ldlrad3
chr1	43178612	43179015	41.53	42.87	130.74	intergenic	Elovl4
chr1	62201509	62201945	23.66	17.31	105.03	intronic	Dusp10
chr1	195531536	195531786	27.46	29.28	116.96	intergenic	Socs2
chr1	184312873	184313123	38.52	40.39	128.06	intergenic	Samd12
chr1	36040199	36040567	43.07	33.94	121.61	intergenic	Gldc
chr1	31386381	31386631	13.48	21.84	109.51	intergenic	Socs3
chr1	4132618	4133012	27.65	25.75	113.32	intergenic	EU234022
chr1	62034655	62034905	29.39	28.4	115.95	intronic	Slc15a1
chr1	46579896	46580146	24.35	21.77	109.27	intergenic	Glis3
chr1	178005632	178005882	46.77	24.23	111.56	intronic	AK048814
chr1	99876859	99877290	40.64	31.17	118.42	intronic	Dnajb9
chr1	74272864	74273246	9.72	25.92	113.08	intergenic	Ehmt1
chr1	167561400	167561650	37.34	42.67	129.78	intronic	Ogt
chr1	10114413	10114663	31.35	45.28	132.36	intronic	Usp49
chr1	184021829	184022279	48.21	37.8	124.7	intergenic	Chd6
chr1	38112050	38112300	30.24	24.01	110.74	exonic	Slc45a4
chr1	52682627	52683077	22.12	42.3	128.95	intergenic	Zfp553
chr1	67044438	67044877	25.82	27.51	114.15	intergenic	Gramd3
chr1	39671412	39671662	49.25	26.11	112.75	intergenic	Loxl4
chr1	138354020	138354270	15.19	26.44	112.87	intergenic	Pvt1
chr1	57041829	57042279	44.96	32.33	118.6	intronic	AK083606
chr1	5894886	5895136	26.28	21.99	108.19	intergenic	Muted
chr1	19941424	19941674	17.57	13.14	99.22	intergenic	Epb4.1l2
chr1	140541576	140542020	59.2	34.8	120.63	intronic	Ptp4a1
chr1	89290303	89290753	20	18.11	103.9	intronic	Wdr75
chr1	157077339	157077589	22.94	25.32	110.64	intronic	BC006965
chr1	166451629	166451879	35.08	26.35	111.62	intergenic	AK048050
chr1	7912094	7912460	20.16	20.35	105.62	intergenic	Ahcyl2
chr1	141052532	141052782	43.01	14.8	99.97	intronic	AK010894
chr1	19774524	19774974	23.73	19.27	104.18	intergenic	Samd7
chr1	163212992	163213242	19.37	56.53	141.4	intergenic	D430042O09Rik
chr1	38447741	38448114	33.58	31.38	116.18	exonic	Fam59a
chr1	164822135	164822385	52.39	29.97	114.75	intronic	Med18
chr1	133970724	133971109	47.29	32.35	116.96	intergenic	AK017137
chr1	158789973	158790405	20.94	9.51	94.05	intronic	Il1r1
chr1	38088380	38088630	14.14	13.45	97.97	intronic	AK020190
chr1	184824953	184825403	39.14	34.05	118.48	exonic	Gpc6
chr1	58643670	58643920	47.65	38.48	122.88	promoter	Nrp2
chr1	71520475	71520963	25.89	19.4	103.78	intergenic	Ube2n
chr1	69623276	69623726	11.95	13.95	98.2	intronic	Anapc7
chr1	34779653	34779903	24.94	28.05	112.26	exonic	AK006160
chr1	62870538	62870788	40.48	28.21	112.29	intergenic	Tln2
chr1	69676009	69676539	24.54	26.81	110.81	intronic	Ctse
chr1	34806345	34806595	39.44	40.26	124.13	intronic	AK144747
chr1	140537617	140538067	25.49	21.15	105	intronic	Tbl1x
chr1	59999237	59999487	23.83	21.02	104.81	intronic	Rbbp8
chr1	69499783	69500174	17.97	35.43	119.16	intergenic	Prcp
chr1	193898618	193899023	42.12	36.75	120.4	intronic	Slc37a2
chr1	136199069	136199319	44.57	36.32	119.96	intronic	Ambra1
chr1	92903252	92903678	32.7	31.28	114.86	intronic	AK043032
chr1	79427629	79427879	47.52	43.68	127.19	intergenic	Mesdc1
chr1	173891596	173891846	13.55	11.78	95.03	intergenic	Iqgap1
chr1	41188300	41188550	33.71	22.97	106.21	intergenic	Scin
chr1	36948345	36948717	42.51	38.77	121.96	intronic	Mast2
chr1	146153533	146153783	12.99	13.59	96.77	intergenic	1700080O16Rik
chr1	172202947	172203197	12.93	7.64	90.8	intergenic	Sntb1
chr1	77472442	77472692	44.64	47.76	130.88	intronic	Tns4
chr1	88013113	88013363	33.12	22.35	105.31	exonic	Pbx1
chr1	169296023	169296273	37.34	53.43	136.35	intronic	Ranbp2
chr1	43651773	43652023	41.99	42.01	124.84	intergenic	Odz4
chr1	181888823	181889073	26.18	22.02	104.82	intergenic	Arpc2
chr1	133986287	133986717	38.16	22.62	105.36	intergenic	Arap2
chr1	138192027	138192439	25.17	15.52	98.1	exonic	Clvs1
chr1	166929014	166929264	9.65	7.32	89.59	intergenic	Enoph1
chr1	190033126	190033376	37.47	22.82	104.97	intronic	Klhdc1
chr1	62918616	62918866	28.08	34.64	116.73	intergenic	Odf2
chr1	93157242	93157672	25.79	50.64	132.72	intronic	Fgd4
chr1	38065595	38065996	40.55	31.4	113.41	intronic	Slc5a6
chr1	78354469	78354867	17.7	27.84	109.8	intronic	Chchd3
chr1	180073989	180074239	55.01	38.08	119.93	intronic	B4galt3
chr1	74306570	74306982	35.77	48.65	130.42	intronic	Ptch1
chr1	172791258	172791508	14.07	17.75	99.51	intronic	Wdr27
chr1	53906794	53907234	21.11	24.54	106.18	intronic	Arhgap26
chr1	193807534	193807784	24.84	39.42	121.06	intronic	Nckap5
chr1	128108123	128108539	36.06	29.89	111.53	intronic	Gm410
chr1	99893668	99894109	42.94	31.27	112.84	intronic	Hltf
chr1	181465553	181465803	27.13	30.32	111.89	promoter	Ammecr1
chr1	152422610	152423003	30.73	27.5	109.02	intronic	Unc5cl
chr1	70226922	70227172	15.78	15.14	96.62	intronic	Vps13b
chr1	151768375	151768625	47.85	32.48	113.82	intronic	H60c
chr1	193641188	193641438	28.28	62.92	144.15	promoter	AK155169
chr1	156974578	156974828	30.86	39.25	120.34	intergenic	Ccdc146
chr1	140773068	140773318	31.32	28.39	109.45	intronic	Eif5b
chr1	40337532	40337982	27.79	23.96	105.02	intronic	Plau
chr1	67592428	67592678	31.61	25.63	106.52	intergenic	Mitf
chr1	23874150	23874586	38.65	30.81	111.69	intronic	Nhlrc2
chr1	94182766	94183016	29.26	18.97	99.84	intergenic	Acn9
chr1	158607387	158607781	52.13	45.78	126.61	intergenic	St3gal6
chr1	182844067	182844317	25.4	26.08	106.84	intergenic	Cdk17
chr1	34439066	34439316	16.49	14.19	94.87	intergenic	Npas3
chr1	78303935	78304384	22.29	35.44	115.92	intergenic	Kcne2
chr1	63070866	63071116	38.98	49.59	130.03	intronic	Ccdc50
chr1	152404196	152404619	39.47	40.46	120.64	intergenic	Samd12
chr1	62788457	62788892	36.26	35.09	115.09	intronic	Cml2
chr1	182458535	182458785	37.34	41.21	121.19	intergenic	AK134652
chr1	39602444	39602894	40.35	36.1	116.07	exonic	Col19a1
chr1	180077082	180077332	38.39	30.28	110.08	intronic	Irx1
chr1	193176078	193176328	45.1	40.69	120.45	exonic	Garnl3
chr1	61745444	61745694	20.49	44.88	124.52	intronic	Dnajc13
chr1	145657115	145657365	39.11	32.87	112.22	intergenic	Akap13
chr1	40410158	40410531	31.35	26.76	106.03	intronic	Usp54
chr1	189496434	189496816	31.45	23.26	102.47	intronic	Tmem164
chr1	172661886	172662136	45.82	26.76	105.71	intronic	6030446N20Rik
chr1	169232401	169232851	22.09	24.67	103.59	intergenic	Ahcyl1
chr1	113557024	113557274	24.87	44.3	123.1	intergenic	Gpr128
chr1	22358027	22358277	16.59	10.43	89.22	intronic	Iyd
chr1	19924134	19924534	12.89	9.58	88.36	intergenic	Vps24
chr1	35771445	35771877	35.18	25.68	104.37	intergenic	Ptpn21
chr1	99860353	99860603	26.44	34.84	113.48	intronic	Erbb4
chr1	40121853	40122103	23.79	24.47	102.99	intergenic	Helt
chr1	91651857	91652293	35.12	34.67	113.03	intronic	Azi1
chr1	191094366	191094616	36.82	34.41	112.69	intronic	Wdr31
chr1	129277267	129277517	37.44	35.13	113.36	intronic	Znrf2
chr1	140513796	140514233	50.07	32.53	110.65	intronic	Eltd1
chr1	23927758	23928008	12.5	13.55	91.61	intronic	Sparc
chr1	165828785	165829035	17.61	11.67	89.56	intronic	AK132084
chr1	182940723	182941151	27.98	37.9	115.73	intronic	Brwd3
chr1	165369823	165370235	15.51	15.76	93.58	intergenic	Palld
chr1	62680357	62680607	20.68	17.22	94.95	intronic	D130009I18Rik
chr1	177508546	177508945	39.86	39.97	117.66	intergenic	Atl2
chr1	139816489	139816900	37.87	24.99	102.64	intergenic	Haao
chr1	31206562	31206993	36.55	42.57	120.14	intronic	C1d
chr1	62759525	62759957	30.31	32.24	109.52	intronic	Ttc29
chr1	127676599	127676849	40.58	35.47	112.68	intronic	AK133093
chr1	133552021	133552271	43.2	37.32	114.51	intronic	Tpt1
chr1	132447169	132447419	27.46	27.63	104.82	intergenic	Stard13
chr1	56923650	56924086	26.41	22.43	99.62	intronic	Ido2
chr1	60835220	60835470	44.15	41.33	118.42	promoter	Atp11b
chr1	159579478	159579728	30.83	25.57	102.54	intergenic	Otud4
chr1	152426131	152426536	44.9	37.46	114.31	intronic	Frs2
chr1	161124449	161124860	28.31	25.62	102.47	intergenic	Gm9871
chr1	170276092	170276342	33.51	24.96	101.73	intronic	Zbtb10
chr1	174499197	174499447	35.51	50.94	127.53	intergenic	Rprm
chr1	59335223	59335473	46.11	34.23	110.79	intronic	Spsb4
chr1	159283866	159284116	46.7	36.06	112.61	intronic	Lrp5
chr1	181901579	181901954	28.05	46.55	123.05	intronic	Klhl12
chr1	93298199	93298449	12.96	31.48	107.97	intergenic	Stt3b
chr1	190988921	190989171	43.66	44.83	121.25	intergenic	4922501L14Rik
chr1	191126923	191127173	39.27	22.36	98.62	intronic	Stk3
chr1	169615824	169616189	37.51	36.05	112.23	intergenic	Snd1
chr1	78532969	78533219	26.48	18.94	95.01	promoter	Pdzrn3
chr1	127182979	127183229	27.62	36.03	112.04	intergenic	Tmem2
chr1	69493897	69494266	34.23	24.42	100.39	intergenic	Agl
chr1	99912073	99912523	34.1	24.28	100.17	intronic	Abcd3
chr1	120494197	120494447	33.41	22.6	98.4	intronic	Glg1
chr1	83144385	83144635	10.31	15.17	90.8	intergenic	Sipa1l1
chr1	136384150	136384568	21.67	29.35	104.81	exonic	Mnd1
chr1	77199500	77199950	18.69	41.51	116.88	intergenic	AK163160
chr1	184672672	184672922	37.47	28.45	103.82	intergenic	Dock1
chr1	20296166	20296537	24.32	18.1	93.42	intronic	B9d1
chr1	56340050	56340439	19.18	15.12	90.21	intergenic	Ube2l3
chr1	120252218	120252600	15.25	24.81	99.88	intergenic	Fgfr2
chr1	108728078	108728328	12.54	8.6	83.64	intergenic	Prl2c5
chr1	32450124	32450574	28.64	21.11	95.59	intronic	AK139544
chr1	4510713	4510963	29.39	36.41	110.67	intergenic	Pbx1
chr1	69152658	69152908	34.59	33.25	107.39	intronic	AK158434
chr1	144664569	144664889	4.81	3.08	77.18	intergenic	Trim26
chr1	190906860	190907257	14.2	13.75	87.72	intergenic	Snrk
chr1	57012248	57012498	29.65	17.19	91.01	intronic	D930020B18Rik
chr1	180866771	180867021	23.2	24.11	97.92	promoter	Vps8
chr1	40196732	40197166	23.76	25.35	99.12	intergenic	Uhrf1bp1l
chr1	6068882	6069277	15.84	16.26	90.01	intergenic	Tas2r119
chr1	182296923	182297173	28.18	23.05	96.71	intronic	Prkca
chr1	121191778	121192028	32.33	26.5	100.07	intergenic	BC023070
chr1	108357048	108357298	21.04	29.29	102.84	intergenic	Abhd12
chr1	136117877	136118127	30.31	27.89	101.25	intronic	AK006859
chr1	46942831	46943281	41.14	37.29	110.47	intergenic	Xrcc6bp1
chr1	98915726	98915976	16.1	10.85	83.89	intergenic	Tmem164
chr1	57896765	57897015	36.13	33.51	106.53	intronic	Abl2
chr1	25941879	25942267	28.38	21.63	94.65	intergenic	Slit2
chr1	37034737	37034987	16.3	28.9	101.81	intergenic	Tmcc3
chr1	133787205	133787455	25.23	20.83	93.59	intergenic	Ccdc3
chr1	191041901	191042151	30.63	23.76	96.36	intronic	Satb2
chr1	71385891	71386141	33.97	37.37	109.89	intronic	Atf6
chr1	166461744	166461994	23.79	55.23	127.74	intergenic	Jhdm1d
chr1	69514541	69514791	31.55	53.18	125.66	intergenic	AK133038
chr1	189434796	189435046	48.7	30	102.33	intronic	Cblb
chr1	155751659	155752085	29.19	45.19	117.39	exonic	Megf9
chr1	152860158	152860526	19.08	20.75	92.75	intergenic	Tnpo3
chr1	32803655	32804068	24.02	22.44	94.22	intergenic	Xpr1
chr1	153118740	153119176	29.09	20.26	91.91	intergenic	1810013L24Rik
chr1	16283360	16283737	35.54	21.55	93.13	intronic	Impg2
chr1	61366512	61366762	31.91	26.21	97.77	intergenic	AK035124
chr1	47375477	47375909	28.67	24.42	95.98	intergenic	Itga8
chr1	91318126	91318376	23.14	17.67	89.21	intergenic	Defb30
chr1	165386051	165386456	38.19	24.87	96.39	intergenic	Ikzf2
chr1	43650615	43650865	29.65	21.85	93.33	intergenic	BC053977
chr1	35840244	35840494	34.27	40.75	112.04	intergenic	Hsdl2
chr1	107777310	107777560	44.31	40.75	112.03	intergenic	Galk2
chr1	82159575	82159966	32.23	29.37	100.47	intergenic	6430548M08Rik
chr1	90055564	90055998	25.36	25.23	96.23	intronic	AK016028
chr1	51859598	51859995	37.6	28.63	99.6	intronic	AK020256
chr1	57321387	57321637	41.99	24.8	95.6	intergenic	Ubac2
chr1	136668755	136669005	49.03	29.92	100.6	intronic	Cyp2f2
chr1	43750695	43750945	14.04	14.94	85.61	intergenic	Cadps
chr1	56461559	56461934	14.01	14.45	84.95	intergenic	Mir1196
chr1	34296369	34296619	16.66	18.48	88.96	intronic	Btbd3
chr1	168008463	168008907	29.95	26.89	97.31	intergenic	Homer1
chr1	157275973	157276420	24.51	28.19	98.59	intergenic	Gm527
chr1	127705380	127705630	38.19	27.67	98.06	intronic	Rad51l1
chr1	191134070	191134320	22.55	31.07	101.38	intronic	Gng7
chr1	149190836	149191086	16.72	11.84	82.13	intergenic	Cdk17
chr1	80482807	80483206	30.37	21.42	91.54	intergenic	AK076947
chr1	46060343	46060593	37.83	28.62	98.69	intergenic	AK038605
chr1	31701919	31702341	13.94	9.94	79.9	intergenic	Tlr5
chr1	35089545	35089795	30.27	20.33	90.2	intergenic	AK054493
chr1	68589420	68589670	16.1	20.71	90.49	intronic	Trio
chr1	169396930	169397180	41.5	32.51	102.1	promoter	F12
chr1	120251203	120251629	33.71	30.12	99.61	intergenic	Zfp532
chr1	132319948	132320198	25.82	21.7	91.19	promoter	Gpr85
chr1	140609066	140609316	17.9	10.87	80.34	intergenic	Trim44
chr1	12395464	12395714	14.01	9.14	78.24	intergenic	Fam46c
chr1	137908080	137908330	29.06	39.81	108.87	intronic	Iqch
chr1	182864032	182864282	27.1	43.49	112.2	promoter	AK043460
chr1	153463660	153464058	33.28	23.15	91.86	intronic	Rnf150
chr1	51857508	51857894	22.48	20.54	89.22	intronic	Cox7c
chr1	76637793	76638188	28.64	26.39	94.93	intergenic	Pan3
chr1	178914412	178914781	20.03	26.6	95.02	intronic	Zfhx3
chr1	71736901	71737151	19.44	29.11	97.52	intergenic	Map2k6
chr1	38415644	38415894	37.6	30.19	98.52	intronic	Btg1
chr1	36109343	36109593	35.28	40.89	109.21	intergenic	Nlgn1
chr1	165588370	165588620	17.74	10.96	79.23	intergenic	Memo1
chr1	121342157	121342407	20.68	31.92	100.1	intergenic	Dtnb
chr1	120573136	120573386	40.94	36.36	104.53	intronic	Maoa
chr1	107644570	107644820	12.96	31.36	99.52	intronic	Frmd6
chr1	35323611	35323861	36.13	18.76	86.86	intergenic	Gorab
chr1	61974827	61975077	29.98	38.58	106.59	intronic	Vwf
chr1	13216947	13217197	15.64	13.31	81.31	intronic	Itgb5
chr1	193391810	193392060	42.08	29.52	97.46	intronic	Casc5
chr1	159374663	159374913	41.99	29.16	97.09	intergenic	2610017I09Rik
chr1	132529844	132530290	25.23	27.3	95.04	intergenic	Foxn3
chr1	82991310	82991744	23.27	21.48	89.08	intergenic	Gne
chr1	139093457	139093907	27	26.74	94.27	intergenic	Fgfr2
chr1	107643299	107643549	21.4	36.35	103.78	intronic	2010111I01Rik
chr1	38959272	38959522	23.79	10.75	78.09	intergenic	Mks1
chr1	132606412	132606662	21.83	39.75	107.03	intronic	Eepd1
chr1	34517430	34517680	33.51	39.07	106.31	intronic	Nudt3
chr1	46900261	46900628	28.9	23.8	91.03	intronic	Pdgfrl
chr1	196144348	196144598	22.12	28.16	95.36	intergenic	Vtcn1
chr1	51909126	51909376	25.62	39.49	106.67	intronic	Atp2b1
chr1	43775746	43775996	19.86	9.31	76.47	intergenic	Ccdc88c
chr1	80424033	80424424	38.29	19.65	86.78	intergenic	Slc39a10
chr1	40244829	40245208	35.38	25.51	92.61	intergenic	Gm9920
chr1	194524055	194524446	26.97	22.69	89.78	intronic	Atp10a
chr1	35393126	35393518	37.8	29.24	96.3	intergenic	AK028773
chr1	184888353	184888603	28.8	29.28	96.3	intronic	Mllt3
chr1	57387094	57387448	40.65	26.91	93.92	intergenic	AK040418
chr1	69497038	69497288	16.79	41.17	108.11	intergenic	Ryr3
chr1	46901280	46901643	23.07	25.45	92.2	intronic	Rasef
chr1	181914360	181914610	30.31	26.16	92.57	intronic	Gnaq
chr1	62693432	62693682	36.62	22.11	88.51	intergenic	Cblb
chr1	59854828	59855078	17.84	15.93	82.08	intronic	Pdk4
chr1	43810903	43811153	30.24	32.03	98.05	intronic	Alcam
chr1	46083702	46083952	41.4	28.89	94.9	intronic	AK144120
chr1	62868538	62868788	14.73	10.75	76.6	intergenic	Mrps28
chr1	154228628	154229022	13.22	16.16	81.84	intronic	Tbc1d2b
chr1	166345962	166346212	21.01	32.47	98.12	intronic	Etv5
chr1	61599289	61599539	36.1	23.44	89.08	intergenic	Sp8
chr1	140386911	140387311	21.14	18.85	84.42	intronic	Wdr52
chr1	137415172	137415422	36.39	36.13	101.56	intronic	AK172672
chr1	195975083	195975333	25.04	30.36	95.78	intergenic	Fez1
chr1	158528847	158529097	32.99	34.73	100.08	intronic	Hoxb13
chr1	192721168	192721418	16.17	45.66	110.73	intronic	Asap1
chr1	158481111	158481361	26.31	39.44	104.34	intergenic	Frmd4a
chr1	56708468	56708718	11.52	10.31	75.13	intergenic	Tas2r134
chr1	78605601	78605851	42.25	25.87	90.57	intergenic	Glp2r
chr1	174176699	174176949	32.43	25.4	90.1	exonic	Robo1
chr1	64742409	64742659	12.99	9.6	74.18	intronic	AK040960
chr1	92945869	92946309	10.77	36.43	100.99	intronic	5330417C22Rik
chr1	51345898	51346148	37.35	19.78	84.34	promoter	A430107O13Rik
chr1	67223140	67223390	11.81	10.25	74.52	intronic	Cab39l
chr1	130480096	130480346	16.17	16.74	80.93	intergenic	Prkacb
chr1	193559978	193560428	23.27	16.17	80.31	intronic	Aox3
chr1	194149061	194149492	22.45	27.47	91.6	intronic	1110002B05Rik
chr1	43210830	43211280	11.81	28.99	93.1	intronic	AK049102
chr1	4884964	4885214	10.41	7.97	71.92	exonic	Gm5148
chr1	13148056	13148306	24.32	25.07	88.95	intronic	Rnls
chr1	189046869	189047119	35.21	23.19	86.88	intronic	Ovol1
chr1	61959463	61959875	26.83	25.32	88.98	intronic	Kctd3
chr1	60919809	60920059	32.66	27.35	90.91	intergenic	DQ717161
chr1	181859817	181860067	24.91	40	103.5	intergenic	Pam
chr1	192918199	192918449	24.48	34.92	98.41	intergenic	Col3a1
chr1	190932737	190932987	33.45	22.41	85.89	intergenic	Zranb2
chr1	42295238	42295631	26.64	30.02	93.37	intergenic	Ms4a13
chr1	107004322	107004768	21.3	13.49	76.82	intergenic	Vcl
chr1	172101237	172101648	28.7	35.16	98.4	intronic	Csnk1g3
chr1	151758100	151758521	39.21	33.89	97.1	intronic	Fam164b
chr1	172725072	172725322	24.38	34.81	97.96	intronic	Tmem108
chr1	31669754	31670004	12.27	9.88	73.01	intergenic	Mdga2
chr1	16046803	16047053	22.75	20.72	83.83	intergenic	Gpc3
chr1	56979221	56979471	21.47	29.81	92.89	intronic	Lhfpl2
chr1	190683600	190684014	23.2	21.37	84.43	intronic	Lrig3
chr1	99913073	99913323	13.48	7.33	70.24	intronic	Pkd2l2
chr1	59031063	59031313	30.21	26.99	89.86	promoter	Acn9
chr1	169424232	169424598	31.03	27.68	90.53	intergenic	Dtnbp1
chr1	157540584	157540834	32.6	28.69	91.44	intergenic	Arid3b
chr1	6303168	6303565	27.52	25.08	87.73	intergenic	Slc38a7
chr1	157193895	157194145	29.91	23.35	85.81	intronic	Kcnk2
chr1	183621794	183622044	31.02	39.71	102.01	intergenic	Trappc10
chr1	129848604	129848854	23.37	22.2	84.42	intergenic	AK007112
chr1	23179853	23180303	20.49	17.74	79.92	intergenic	Paqr8
chr1	64950020	64950270	19.57	20.61	82.37	intronic	Dpy30
chr1	51735304	51735554	36.62	23.34	85.07	intergenic	Tiprl
chr1	72468852	72469102	31.94	23.06	84.71	intergenic	Ypel5
chr1	99868444	99868878	26.28	26.13	87.55	intronic	Npas3
chr1	38087846	38088096	15.78	8.42	69.84	intronic	Rchy1
chr1	108120465	108120859	21.11	26.73	88.08	intronic	DQ724590
chr1	155908996	155909360	36.29	26.57	87.88	intronic	3110043O21Rik
chr1	66191873	66192123	23.76	15.6	76.91	intergenic	Gipc2
chr1	98769051	98769301	41.2	25.99	87.23	promoter	Arhgap28
chr1	51878910	51879160	15.09	17.95	79.02	intronic	Pawr
chr1	78360177	78360427	25.46	26.87	87.83	intronic	Guca2b
chr1	34361928	34362178	39.5	27.58	88.5	intronic	Mat2b
chr1	31196805	31197055	17.31	23.64	84.46	intergenic	Klf5
chr1	69484184	69484434	26.15	37.96	98.71	intergenic	Tnip3
chr1	35793532	35793782	14.04	10.13	70.88	intergenic	Phtf2
chr1	7565222	7565472	15.28	14.57	75.26	intergenic	Apol11a
chr1	4105674	4105924	17.48	14.93	75.61	intergenic	Bre
chr1	16153509	16153847	21.01	22.37	82.94	intergenic	Fam20b
chr1	60792032	60792282	39.96	26.14	86.68	intergenic	Mageb3
chr1	172653981	172654231	29.09	26.12	86.63	intronic	Lgr4
chr1	31421180	31421430	7.53	22.18	82.59	intergenic	Gm4906
chr1	153780730	153780980	28.18	38.69	98.93	intronic	Tns3
chr1	38919101	38919351	28.7	26.48	86.59	intergenic	Ccl11
chr1	37956453	37956703	29.85	13.99	73.97	intergenic	Agr2
chr1	75035595	75035989	20.45	26.29	86.23	intronic	Mllt3
chr1	83106378	83106628	26.48	35.94	95.88	intergenic	Usp32
chr1	45370835	45371205	35.34	27.62	87.5	intronic	Dlg1
chr1	61142579	61142829	6.97	7.43	67.29	intergenic	Oas1f
chr1	140302789	140303168	21.04	10.21	69.79	intergenic	Tsen15
chr1	166689490	166689740	12.86	10.97	70.51	intergenic	Hs6st3
chr1	153708903	153709153	26.9	24.86	84.33	intronic	Pik3cg
chr1	181860217	181860467	32.56	28.44	87.89	intergenic	Slc6a14
chr1	139872316	139872566	17.35	16.57	76.02	intergenic	Fndc3b
chr1	170364692	170364942	33.28	32.43	91.83	intergenic	Akap6
chr1	180179990	180180240	26.48	34.59	93.85	exonic	Tmtc2
chr1	88497674	88497924	21.01	31.59	90.83	exonic	Slco2a1
chr1	35876026	35876368	21.04	18.46	77.68	intergenic	Prdm2
chr1	57323713	57323963	43.13	20.71	79.92	intergenic	AK163160
chr1	155451396	155451646	29.13	22.51	81.54	intergenic	AK076733
chr1	20354481	20354927	40.87	24.93	83.87	intronic	9130014G24Rik
chr1	44273980	44274362	17.9	15.6	74.54	intronic	Zmym2
chr1	191007386	191007636	32.27	30.22	89.16	intergenic	Ptprd
chr1	40322797	40323047	23.14	19.53	78.38	promoter	Hivep1
chr1	145405173	145405423	8.22	15.54	74.38	intergenic	Gm12298
chr1	61714356	61714606	32.2	26.29	85.12	intronic	Pcyox1l
chr1	52052900	52053150	28.21	22.77	81.55	intronic	Tusc3
chr1	182652647	182652897	7.98	27.05	85.74	intergenic	Tcfap2c
chr1	193339219	193339469	33.09	26.4	85.07	intergenic	Cmya5
chr1	23357544	23357794	16.72	17.99	76.65	intergenic	Unc5cl
chr1	153176473	153176723	15.94	37	95.66	intergenic	Pdia4
chr1	181839707	181839957	33.09	20.21	78.86	intergenic	Dpp6
chr1	20853149	20853399	33.18	26.91	85.52	intergenic	Cbl
chr1	15637215	15637600	32.47	32.93	91.51	intronic	Oxr1
chr1	13365954	13366204	22.42	24.52	83.1	promoter	Dmxl1
chr1	56345457	56345707	38.58	21.22	79.61	intergenic	AK155516
chr1	121440393	121440643	20.16	40.14	98.52	intergenic	Msr1
chr1	177967338	177967588	26.12	23.86	82.16	intronic	Parm1
chr1	51570028	51570278	31.35	21.5	79.79	intronic	Ktn1
chr1	23407434	23407844	29.55	24.72	82.75	intergenic	Fchsd2
chr1	166630426	166630676	15.22	14.57	72.59	intergenic	Mir148a
chr1	89188205	89188455	18	15.36	73.16	intronic	Pde4b
chr1	75054158	75054408	29.06	29.58	87.32	intronic	Brip1
chr1	157039403	157039653	19.86	19.29	76.83	intronic	Ctage5
chr1	37642161	37642411	15.25	16.17	73.69	intergenic	Coq2
chr1	69732592	69732842	27.39	35.5	93.01	promoter	Zfp827
chr1	158608364	158608614	20.75	25.64	83.13	intergenic	Unc79
chr1	7508877	7509127	26.83	14.44	71.88	intergenic	Myo1b
chr1	41119370	41119620	34.69	19.76	77.09	intergenic	Asns
chr1	46469427	46469677	18.33	21.41	78.67	intergenic	Lrriq3
chr1	183851617	183851867	40.03	20.43	77.65	exonic	Dnajb5
chr1	129189954	129190204	18.85	29.28	86.47	intronic	4921506M07Rik
chr1	140141158	140141408	18.92	19.19	76.25	intergenic	Iqch
chr1	46043570	46043820	10.31	7.9	64.88	intergenic	AK039104
chr1	120835302	120835552	29.26	22.95	79.87	intronic	Gjb1
chr1	153474340	153474766	21.08	24.13	80.89	intronic	Alox5ap
chr1	53912512	53912762	28.24	15.85	72.59	intronic	Hace1
chr1	78643653	78643903	32.33	26.27	82.86	intergenic	Wwp1
chr1	19856262	19856658	12.96	6.17	62.68	intergenic	AK018624
chr1	108171245	108171611	33.58	23.54	79.9	intronic	Slc9a9
chr1	76660734	76660984	12.4	13.17	69.53	intergenic	Osbpl11
chr1	133207249	133207499	33.02	23.26	79.39	exonic	Vps8
chr1	74296966	74297407	15.25	20.25	76.23	intronic	Snx30
chr1	58230443	58230693	25.3	32.45	88.41	intronic	Mtap2
chr1	59623745	59623995	28.38	26.28	82.18	intronic	Lcorl
chr1	167970860	167971283	24.87	33.45	89.31	intergenic	Twf1
chr1	43740110	43740360	23.2	16.63	72.41	intergenic	AK132084
chr1	169532999	169533249	26.9	31.77	87.5	intronic	Acvr2a
chr1	46944792	46945042	30.44	27.23	82.91	intergenic	Vps13b
chr1	31108063	31108313	8.05	7.3	62.89	intergenic	Tpt1
chr1	35581790	35582040	25.73	16.99	72.55	intergenic	Eml1
chr1	42942121	42942371	36.36	21.75	77.29	intronic	Mitf
chr1	167159418	167159668	22.02	29.36	84.7	intronic	AK147021
chr1	132447742	132447992	31.68	22.96	78.29	intergenic	Bcas3
chr1	145963638	145963888	21.4	36.63	91.89	intergenic	Psmd7
chr1	151709260	151709510	30.96	22.09	77.27	intronic	9130209A04Rik
chr1	78368904	78369154	16.66	24.03	79.12	intronic	Golm1
chr1	71466649	71466899	9.72	17.76	72.66	intergenic	Foxb1
chr1	172481163	172481413	25.53	31.07	85.83	intronic	AK076733
chr1	41118992	41119242	34.66	22.01	76.76	intergenic	Nudt5
chr1	128989361	128989611	29.26	17.45	72.11	intergenic	1700129C05Rik
chr1	6649552	6649963	21.01	19.42	74.02	intronic	Reck
chr1	61667638	61667888	31.02	21.82	76.12	intergenic	Cadps2
chr1	192966321	192966571	18.36	26.84	81.03	intergenic	Tpx2
chr1	180242546	180242931	25.43	31.21	85.35	intergenic	Srsf1
chr1	181691367	181691617	21.21	11.47	65.56	intronic	AK029599
chr1	51919845	51920095	23.63	15.86	69.91	exonic	4832428D23Rik
chr1	20122391	20122641	10.8	11.43	65.41	intronic	Rapgef5
chr1	138950268	138950518	13.48	15.75	69.55	intergenic	Akap2
chr1	31594895	31595145	10.83	7.02	60.79	intergenic	Nexn
chr1	176231569	176231819	16.33	19.06	72.64	intergenic	Klf5
chr1	152577612	152577862	7.07	5.15	58.73	intronic	Casp4
chr1	37547241	37547491	14.53	28.61	82.1	promoter	Atxn1
chr1	157328654	157328904	32.89	22.51	75.97	intergenic	Lass4
chr1	158800409	158800659	12.86	7.29	60.6	intronic	Asph
chr1	140200819	140201069	25.46	14.07	67.19	intergenic	Gm4850
chr1	191081059	191081309	23.92	26.52	79.62	intronic	St7
chr1	182233019	182233269	21.4	36.97	90.07	intergenic	Myo1e
chr1	52846070	52846320	18.03	16.8	69.76	exonic	Abca12
chr1	133206849	133207099	36.49	15.02	67.97	exonic	Tox
chr1	90334545	90334795	25.89	26.29	79.05	intergenic	Fgd6
chr1	72424736	72424986	27.72	26.14	78.71	intronic	Cryl1
chr1	64964886	64965136	33.19	20.94	73.49	intronic	Kdm5b
chr1	56687416	56687666	13.48	18.16	70.63	intergenic	Dcbld2
chr1	184427770	184428020	14.86	18.54	70.71	intronic	A930007I19Rik
chr1	16206587	16206837	25.43	29.28	81.32	intergenic	Cask
chr1	45887273	45887523	14.01	10.37	62.36	intergenic	Msi2
chr1	155345263	155345513	15.94	26.94	78.92	intergenic	AK146979
chr1	82254058	82254435	22.32	28	79.86	intronic	Gm6938
chr1	69726027	69726410	21.76	18.69	70.42	intronic	Eif4g3
chr1	40287140	40287390	19.67	21.64	73.12	intronic	Mdga2
chr1	177886690	177886940	36.2	16.87	68.26	intergenic	Arhgap19
chr1	168073254	168073504	22.16	27.51	78.86	intronic	Arfip1
chr1	179410632	179410882	25.95	22.62	73.95	intergenic	Atp6v0a4
chr1	138352820	138353070	20.16	27.2	78.43	intergenic	AK150559
chr1	154635118	154635368	18.92	19.73	70.91	intergenic	Osbpl6
chr1	61980357	61980607	17.77	21.57	72.69	intronic	Exoc6b
chr1	24027813	24028063	14.66	16.19	67.24	intronic	Eml4
chr1	59543734	59543984	24.77	28.35	79.33	exonic	Aff3
chr1	6972203	6972453	11.49	11.93	62.91	intergenic	OTTMUSG00000013918
chr1	166088603	166088853	20.55	21.33	72.25	intronic	Lima1
chr1	155204296	155204546	25.59	17.63	68.5	intergenic	Dock9
chr1	122525406	122525656	28.37	25.27	75.68	intergenic	Cxcr7
chr1	25888092	25888342	28.11	20.94	71.29	promoter	Bpgm
chr1	181453758	181454008	9.3	27.06	77.37	intergenic	Rbbp8
chr1	136621639	136621889	26.51	24.67	74.79	intronic	Kbtbd8
chr1	33038995	33039245	14.07	15.9	66.01	intergenic	Nup160
chr1	154347870	154348120	24.41	21.22	71.21	intronic	AK076817
chr1	38560624	38560874	19.83	20.16	70.05	intronic	AK012035
chr1	140426858	140427108	23.86	20.26	69.71	intronic	Srgap2
chr1	184766215	184766465	27.59	22.75	72.11	intronic	AK139864
chr1	87953880	87954130	14.56	18.65	67.88	intergenic	Zfp521
chr1	99770712	99770962	21.99	23.26	72.47	intronic	Bre
chr1	93376836	93377086	21.14	16.67	65.87	intergenic	Ugt2b35
chr1	74232352	74232779	13.62	15.08	64.28	intergenic	Arhgdib
chr1	78535714	78535964	24.45	21.48	70.5	intronic	AK015289
chr1	56079005	56079255	19.67	16.31	65.15	intergenic	Stk39
chr1	23184267	23184517	18.36	17.01	65.76	intergenic	Ccl9
chr1	3983100	3983350	6.02	5.65	54.37	intergenic	Vwa2
chr1	128333990	128334240	14.99	14.05	62.68	intronic	Megf9
chr1	36753339	36753589	13.16	18.34	66.78	intergenic	Bnc2
chr1	182854766	182855016	23.4	25.57	73.99	intergenic	Sugt1
chr1	40975790	40976040	24.61	11.36	59.75	intergenic	Slc44a1
chr1	31054553	31054803	15.09	14.08	62.46	intergenic	AK156980
chr1	64048345	64048595	21.73	22.15	70.48	intergenic	Slc7a8
chr1	22283361	22283611	14.5	19.02	67.31	intronic	Slc44a1
chr1	172126749	172126999	23.99	24.17	72.44	intergenic	Lama2
chr1	180149334	180149584	15.19	15.26	63.47	intronic	Arg1
chr1	94014585	94014835	13.45	18	66.2	intronic	Dbpht2
chr1	33778878	33779128	19.6	21.46	69.57	intronic	Zbtb16
chr1	152975346	152975596	15.15	12.38	60.43	intergenic	Itih2
chr1	69653533	69653783	21.7	19.45	67.47	intronic	E230016K23Rik
chr1	56605382	56605632	14.96	14.76	62.76	intergenic	Ppp2r5c
chr1	181349616	181349866	25.26	15.15	63.01	intronic	Pkhd1
chr1	63260773	63261023	28.11	10.98	58.84	promoter	Cdh4
chr1	108067110	108067360	18	14.32	62.02	promoter	Mmd
chr1	59974262	59974512	19.41	20.77	68.16	intronic	Ngly1
chr1	184395345	184395595	19.11	16.15	63.44	intergenic	Zcchc12
chr1	108138463	108138713	21.01	8.84	56.11	intronic	Net1
chr1	39208452	39208702	23.07	18.22	65.47	intergenic	Egln3
chr1	51391586	51391836	22.84	14.41	61.6	intergenic	Upk1b
chr1	10183611	10183861	23.89	15.98	63.13	intronic	AK050283
chr1	23852474	23852724	15.28	11.05	58.09	exonic	Rptor
chr1	136508357	136508607	17.25	25.23	72.07	intronic	4930473A06Rik
chr1	70174742	70174992	18.69	12.93	59.6	intronic	Ywhaz
chr1	92245428	92245678	24.45	22.76	69.42	intergenic	Fbxl7
chr1	108085597	108085847	14.01	7.9	54.52	intronic	2410004B18Rik
chr1	64039257	64039507	22.65	23.46	70.03	intergenic	Narf
chr1	78699599	78699849	28.67	13.42	59.94	intronic	Aldh1l1
chr1	194139729	194139979	20.94	24.48	70.99	intronic	Fat4
chr1	33844941	33845191	19.28	13.58	59.99	intronic	9130014G24Rik
chr1	156519892	156520142	25.23	21.47	67.85	intronic	Zc3h15
chr1	62954166	62954416	15.09	10.84	57.22	intergenic	Arfgef1
chr1	54741059	54741309	21.57	16.46	62.72	intronic	Oxr1
chr1	60000608	60000858	21.5	15.85	62.11	intronic	Cntln
chr1	89267412	89267662	22.91	13.6	59.32	intronic	2010111I01Rik
chr1	55945834	55946084	21.96	19.61	65.29	intergenic	Klra18
chr1	94091177	94091513	24.77	13.05	58.44	intergenic	AK020061
chr1	65883166	65883416	3.34	2.65	47.99	intergenic	AY026312
chr1	121539775	121540025	19.41	25.4	70.68	intronic	Irf2
chr1	93515281	93515531	26.93	17.86	62.77	intergenic	Stk35
chr1	20440192	20440543	26.38	23.04	67.63	exonic	Enkur
chr1	65169111	65169361	15.15	14.17	58.73	intronic	AK040320
chr1	137088659	137089022	12.47	22.22	66.66	intergenic	Hmcn1
chr1	181498616	181498866	16.56	13.35	57.76	intronic	Tbc1d15
chr1	165441174	165441424	13.97	13.71	57.96	intergenic	Acvr2a
chr1	108270797	108271047	25.4	18.73	62.78	intronic	Hmga2
chr1	71985175	71985425	25.66	15.32	59.37	intergenic	Chrdl1
chr1	186895222	186895472	22.88	16	59.89	intergenic	Ubr1
chr1	31420670	31420920	6.02	21.35	65.13	intergenic	Gm6756
chr1	151951491	151951741	24.64	14.51	58.09	exonic	AK029599
chr1	155204670	155204920	20.39	23.18	66.75	intergenic	Dip2c
chr1	31013665	31013915	10.83	12.94	56.44	intergenic	AK020190
chr1	128108621	128108871	18.72	19.21	62.36	intronic	Slc16a10
chr1	44021474	44021724	19.37	16.81	59.93	intronic	Gm7550
chr1	60539868	60540118	22.55	19.12	62.23	exonic	Tecpr2
chr1	178879834	178880084	14.5	7.4	50.36	intronic	AK080311
chr1	32486448	32486698	21.6	13.99	56.81	intronic	Iqcj-schip1
chr1	130567967	130568217	13.03	19.07	61.7	intergenic	Tcf7l1
chr1	58055427	58055677	21.9	11.43	54.06	intronic	Fgf1
chr1	119449560	119449810	13.94	10.38	52.73	intergenic	Cth
chr1	35419774	35420024	22.16	15.56	57.84	intergenic	Galnt2
chr1	3855601	3855851	6.61	6.95	48.94	intergenic	Rev3l
chr1	140252291	140252541	19.44	16.23	57.83	intergenic	Herc1
chr1	184022629	184022879	17.21	24.57	66.12	intergenic	Cypt8
chr1	68153155	68153405	7.56	15.51	56.99	intronic	Atg10
chr1	52804781	52805031	15.25	7.88	49.35	intergenic	Hivep1
chr1	145962438	145962688	14.2	11.91	53.3	intergenic	Enox2
chr1	107002223	107002473	14.89	15.36	56.28	intergenic	Far1
chr1	96786396	96786646	7	6.34	47.18	intergenic	Gria2
chr1	129169017	129169267	10.93	17.91	58.57	intronic	Fancc
chr1	170365492	170365742	12.99	11.65	52.11	intergenic	AK131834
chr1	35362614	35362864	19.15	17.53	57.81	intergenic	Dgkd
chr1	87595113	87595363	18.85	16.09	55.74	intronic	9530068E07Rik
chr1	40401522	40401772	15.84	13.78	52.6	intronic	Slc27a6
chr1	54657639	54657889	16.76	16.37	54.9	intergenic	2700089E24Rik
chr1	89289503	89289753	11.81	11.24	49.58	intronic	Mecom
chr1	189564357	189564607	21.6	15.67	53.98	intronic	Ube2v1
chr1	32804317	32804567	10.73	10.46	48.53	intergenic	Hao2
chr1	33811090	33811340	13.48	14.14	52.12	intronic	Sash1
chr1	57258492	57258742	13.45	17.06	54.95	exonic	AK019420
chr1	89806589	89806839	16.33	16.9	54.72	intronic	Tmem174
chr1	187069528	187069778	15.05	22.91	60.64	promoter	Lpxn
chr1	35759425	35759675	19.01	16.22	53.87	intergenic	Mfsd6
chr1	52732903	52733153	20.13	13.29	50.88	exonic	Nrip1
chr1	14560884	14561134	13.03	10.78	48.06	intergenic	Sh3rf2
chr1	56345857	56346107	15.05	10.12	47.38	intergenic	Ica1
chr1	13553453	13553703	19.08	12.88	49.57	intergenic	Izumo3
chr1	14670189	14670439	9.23	9.51	46.12	intergenic	Vps13b
chr1	31588533	31588783	9.16	9.29	45.68	intergenic	B4galt4
chr1	140520570	140520820	15.68	18.17	54.02	intergenic	D4Bwg0951e
chr1	57893579	57893829	11.85	13.56	49.08	intronic	Stk39
chr1	82199780	82200030	16.23	15.33	50.5	intergenic	Sipa1l3
chr1	166991222	166991472	16.59	9.68	44.64	intergenic	Epha7
chr1	57012740	57012990	20.29	10	44.76	intronic	Slc38a2
chr1	62762752	62763002	10.38	13.16	47.84	intronic	AK015284
chr1	69559544	69559794	11.32	15.23	48.63	intergenic	Gtsf1
chr1	69415047	69415297	12.96	10.27	43.25	intergenic	AK151815
chr1	47334839	47335089	6.9	3.53	35.66	intergenic	Sfmbt1
chr1	62175618	62175868	14.4	6.89	39	intronic	Ikzf2
chr1	140863876	140864126	5.92	16.03	47.83	promoter	Prickle1
chr1	108690843	108691093	11.32	14.71	45.45	intronic	Utp11l
chr1	193049792	193050042	8.54	16.89	46.65	intergenic	Sntb1
chr1	63724384	63724634	11.98	10.72	39.94	intronic	Fbxw11
chr1	43083290	43083540	7.63	12.52	41.67	intronic	Glra3
chr1	56074934	56075184	11.91	6.09	32.45	promoter	Acta2
chr1	99990683	99990933	5.92	7.32	33.26	intronic	Bcor
chr1	56073788	56074038	11.88	5.38	28.34	promoter	Pdss2
chr1	166138973	166139223	3.24	10.61	33.02	exonic	Inpp4b
chr1	163212392	163212642	7.95	8.16	30.47	intergenic	AK005643
chr1	74497429	74497679	7.56	5.69	27.95	intronic	Dync2h1
chr10	101973585	101975572	168.11	290.3	1406.68	promoter	Grin2b
chr10	95588084	95589319	143.64	190.53	1218.53	intergenic	Eea1
chr10	107189637	107190484	303.29	263.97	1113.14	intergenic	Nov
chr10	4423568	4424415	210.89	155.77	972.33	promoter	Il1rl2
chr10	18810443	18811493	182.81	190.99	923.06	intergenic	Edn1
chr10	118579785	118580799	193.7	247.73	966.34	intergenic	Elmo1
chr10	125110498	125111246	77.76	66.28	764.3	intergenic	A730085E03Rik
chr10	121309849	121310899	295.35	265.07	949.42	intronic	Wwox
chr10	7078223	7079473	138.76	174.68	844	promoter	AK133014
chr10	124904315	124905165	82.96	78.88	737.86	intergenic	Xrcc2
chr10	119806151	119807001	271.44	153.5	808.99	intronic	Tle4
chr10	88241665	88243115	104.56	89	738.36	intronic	Klf6
chr10	96386805	96387855	261.03	214.78	859.54	intergenic	AK162388
chr10	10574217	10574867	39.27	28	630.1	intronic	Bicc1
chr10	121273748	121274953	362.25	209.48	800.04	intronic	Sntb1
chr10	40329657	40330507	48.31	63.67	653.86	intergenic	Ramp3
chr10	124799516	124800324	230.75	267.34	852.75	intergenic	Slc16a7
chr10	114641994	114642793	261.12	129.66	714.83	intronic	Enox1
chr10	69502485	69503135	289.67	308.42	891.78	intergenic	FJ744746
chr10	6447920	6448548	94.35	69.55	648.27	intronic	Tanc1
chr10	121564964	121565814	79.26	50.8	627.34	intronic	Kif21a
chr10	77449573	77450423	85.94	136.01	709.13	promoter	Ell2
chr10	76032465	76032915	117.26	211.17	765.94	exonic	Ckmt2
chr10	21414660	21415510	55.67	51.15	605.8	intergenic	1190002N15Rik
chr10	3500894	3502099	85.42	62.88	600.6	intronic	Madd
chr10	127361618	127362624	122.4	167.1	701.42	intergenic	Farp1
chr10	120103460	120104310	290.78	228.3	762.41	intergenic	Efna5
chr10	70521306	70522156	172.47	219.91	753.37	intronic	Igf1r
chr10	4310042	4310808	200.25	147.45	669.95	intergenic	AK005643
chr10	82190336	82191461	85.94	93.62	613.87	promoter	Tmem168
chr10	67518539	67519779	135.69	103.32	613.38	intronic	Cnot10
chr10	119052331	119052781	212.24	145.27	646.43	intronic	Zfp704
chr10	104557216	104557866	211.04	171.7	660.29	intergenic	Mllt3
chr10	20128896	20129722	66.8	69.35	546.51	intronic	Mllt3
chr10	19596781	19597610	190.71	194.48	669.94	intronic	Prss32
chr10	114480674	114481524	70.72	84.2	558.47	intergenic	Hyal4
chr10	42828216	42829066	107.9	123.15	595.1	intronic	Dnm3
chr10	6475183	6475833	162.89	76.41	547.49	promoter	4930402H24Rik
chr10	13809833	13810461	55.93	60.3	531.33	intronic	Boc
chr10	6404608	6405258	275.13	220.02	686.45	intronic	Adra2a
chr10	120643097	120643547	292.06	217.74	680.47	intergenic	Lcorl
chr10	122008252	122008902	103.95	87.71	548.68	intergenic	Hormad2
chr10	67308612	67309238	239.43	186.18	644.45	intergenic	L3mbtl4
chr10	94799224	94800074	217.24	186.16	630.19	intergenic	Ndfip1
chr10	110389937	110390787	143.48	127.36	568.97	intronic	1600029D21Rik
chr10	95192300	95193150	137.25	223.91	665.02	promoter	AK018902
chr10	24543308	24544270	132.48	107.67	547.74	intronic	Hpcal1
chr10	8006763	8007586	148.8	116.73	556.14	intronic	Mex3c
chr10	41893572	41894017	123.67	122.91	551.85	intergenic	Asap1
chr10	17135775	17136333	54.19	95.12	524.01	intergenic	Nos1ap
chr10	10504764	10505770	101.62	74.96	502.87	intronic	Amotl1
chr10	121553263	121554095	57.4	46.69	473.33	intergenic	AK006738
chr10	56096857	56097307	152.18	105.9	528.12	promoter	Pde4d
chr10	13058742	13059589	116.28	138.91	558.14	intronic	Pla2r1
chr10	20541712	20542262	24.32	34.62	449.89	intergenic	Stc2
chr10	12377684	12378686	134.08	78.64	493.53	exonic	2310061C15Rik
chr10	10274684	10275507	41.14	57.86	470.4	intronic	Slc2a13
chr10	120664915	120665756	97.33	82.75	494.83	intergenic	Tmem26
chr10	125866527	125866952	27.23	25.75	433.9	intergenic	Ccnd1
chr10	27315522	27315959	32.92	85.11	490.01	intronic	Ror1
chr10	98871994	98872920	79.39	70.09	474.55	intronic	Atg5
chr10	4332349	4332969	63	67.73	470.64	intergenic	AK213775
chr10	42793829	42794233	107.51	53.95	454.29	intronic	AK150110
chr10	38845995	38846645	32.89	60.42	458.88	intronic	Asb3
chr10	59505097	59505923	127.21	192.4	587.89	intronic	Thada
chr10	88256938	88257788	54.26	30.59	424.87	intronic	Dnajc11
chr10	19676598	19677048	218.09	144.47	538.33	intronic	Prosc
chr10	16935293	16935931	84.96	57.01	450.47	intergenic	AK199184
chr10	117180629	117181479	44.08	55.74	449	intronic	Hlx
chr10	8865130	8865971	74.1	58.54	450.62	intergenic	Il1rl2
chr10	7038386	7038829	157.03	252.82	644.56	intergenic	Glrx3
chr10	4429090	4430468	64.54	54.22	445.56	intronic	Pdlim3
chr10	93365348	93365798	105.74	141.84	529.38	intergenic	Xylt1
chr10	61056114	61056764	144.32	143.02	527.99	promoter	1300010F03Rik
chr10	126225818	126226468	104.07	88.99	473.89	intergenic	Vps41
chr10	66519120	66519556	187.59	166.02	550.69	intronic	Phactr1
chr10	24254678	24255128	63.75	45.43	429.56	intergenic	AK076987
chr10	125869576	125870200	66.82	39.06	417.26	intergenic	4833423E24Rik
chr10	83099887	83100337	140.42	163.7	538.72	intronic	Sox5
chr10	39182428	39182878	205.35	137.87	511.66	intronic	Lhcgr
chr10	4424961	4425609	124.13	73.67	446.43	intronic	Magi1
chr10	93985505	93985955	48.63	62.32	432.16	intronic	Parva
chr10	69732061	69732511	196.86	146.62	515.35	intronic	Nedd9
chr10	6495246	6495695	100.24	103.02	466.51	intronic	Srgap1
chr10	93406988	93407421	84.76	69.06	432.38	intergenic	Adamtsl3
chr10	19351305	19351955	117.85	153.01	513.68	exonic	Pyroxd2
chr10	21273676	21274714	128.87	104.47	464.5	intergenic	Kif5b
chr10	17699358	17700008	72.81	100.95	460.06	intergenic	AK076961
chr10	36980539	36981377	160.55	139.44	497.39	intergenic	AK140017
chr10	107941948	107942389	202.44	160.46	514.46	intronic	Lhfp
chr10	8749396	8750040	61.5	51.67	404.06	intergenic	Cyp4f16
chr10	126270728	126271378	50.43	32.17	384.04	intergenic	D6Ertd474e
chr10	121711965	121712615	32.73	60.3	405.53	intergenic	Armc3
chr10	44023988	44024421	211.38	179.27	522.29	intronic	Zfp521
chr10	119751701	119752512	83	62.15	403.82	intergenic	AK199184
chr10	23807512	23808158	94.28	77.76	414.8	intergenic	Gpr88
chr10	68571025	68571472	92.13	142.2	472.85	intergenic	Dennd1a
chr10	110355863	110356313	201	136.91	465.69	promoter	Tox
chr10	96246599	96247217	35.9	27.2	355.48	intergenic	Tox
chr10	34376927	34377777	39.6	25.26	352.49	intergenic	St8sia6
chr10	120287503	120288153	85.26	90.74	414.92	intronic	AK016284
chr10	120351773	120352611	92.29	71.95	394.79	intergenic	Gm527
chr10	4435982	4436612	59.2	51.71	373.54	intronic	Sv2c
chr10	111033677	111034727	81.94	79.65	400.97	intergenic	Bai2
chr10	41828463	41828913	78.81	72.17	393.06	intergenic	AK145307
chr10	27990440	27991050	59.69	47.19	367.87	intronic	Nov
chr10	19759957	19760407	98.71	118.22	437.49	intronic	Cmah
chr10	119198493	119199343	84.53	70.42	386.9	intronic	Ugcg
chr10	114915527	114916577	156.79	132.09	448.29	exonic	Col8a1
chr10	68360244	68360665	170.51	214.31	530.2	intergenic	Gm5077
chr10	106737691	106738122	126.35	151.75	463.28	intronic	Etv1
chr10	41890508	41891158	150.84	159.86	471.12	intergenic	Dpysl3
chr10	107728682	107729300	114.93	161.31	472.19	intergenic	Ophn1
chr10	29005626	29006076	62.77	52.86	363.73	intergenic	1700044K03Rik
chr10	9437805	9438255	171.29	129.5	439.72	intergenic	Thbs2
chr10	116958504	116958954	66.04	45.26	353.66	intergenic	Arg2
chr10	7075044	7075492	69.25	125.62	433.72	intergenic	Gvin1
chr10	104871831	104872481	65.06	56.23	363.84	intronic	Slc44a1
chr10	43744318	43744968	66.56	50.06	356.76	intergenic	Sergef
chr10	56173368	56173966	70.43	50.47	357.06	intronic	DQ705824
chr10	56490438	56491088	45.52	34.12	337.3	intergenic	Slc24a6
chr10	95860800	95861650	115.36	60.93	362.01	intergenic	Spats2l
chr10	99307000	99307442	127.46	103.96	403.99	intergenic	Cdk14
chr10	31032486	31032925	145.49	140.83	438.78	promoter	Cldn14
chr10	110441480	110441930	74.68	110.38	408.13	intronic	Hs3st1
chr10	21496391	21496995	112.67	93.04	390.3	intergenic	Clec2i
chr10	83220270	83220720	152.74	99.58	396.53	intronic	Mtus1
chr10	119362744	119363360	78.45	80.68	377.3	intronic	St3gal1
chr10	125375093	125375743	81.29	142.95	438.54	intergenic	Grip1
chr10	98631306	98631956	96.54	72.4	366.08	intronic	Tmtc1
chr10	58724395	58725045	115.88	116.68	410.02	intergenic	Klhdc7a
chr10	76903830	76904280	169.6	147.7	438.53	intergenic	Obfc1
chr10	90523546	90523961	144.55	168.33	458.79	intronic	AK134945
chr10	119395084	119395524	53.97	36.61	326.69	intronic	Lpo
chr10	60451442	60451892	56.78	59.05	348.41	intergenic	AK076852
chr10	86248709	86249148	39.63	45.93	334.64	intronic	Pde7b
chr10	20125320	20125570	220.54	99.97	387.73	intronic	Ccrn4l
chr10	20219050	20219484	169.26	162.66	449.56	intronic	Eps8
chr10	84148218	84149268	80.74	70.37	356.82	intronic	Spag17
chr10	56088964	56089392	118.31	66.92	351.51	intergenic	Gm889
chr10	84272850	84273454	78.74	69.38	353.67	intronic	Pitx2
chr10	111109979	111110429	115.04	166.91	450.8	intergenic	Cpne8
chr10	93818460	93818909	57.01	42.65	325.79	intronic	Lphn2
chr10	82438481	82438925	46.83	57.89	340.91	intergenic	Atp1a1
chr10	110409064	110409514	67.65	47.19	329.99	intronic	Sh3tc2
chr10	95683334	95683775	48.66	54.77	337.49	intergenic	Usp6nl
chr10	8539539	8540189	76.94	102.67	384.67	intronic	AK200207
chr10	16933542	16933792	145.53	103.98	384.73	intergenic	Sntg2
chr10	60832900	60833350	71.71	75.62	356.29	intronic	Stam
chr10	82831610	82832058	52.26	47.91	327.32	intergenic	Fbxo21
chr10	124279694	124280127	111.73	107.38	385.99	intergenic	D19Ertd652e
chr10	124926998	124927836	85.84	77.85	356.26	intergenic	Wwc2
chr10	119927415	119927865	55.41	57.78	336.13	intergenic	Rnf219
chr10	66548647	66549097	78.06	164.19	442.48	intronic	Ikzf2
chr10	40292805	40293455	106.69	111.07	389.01	intronic	Sp3
chr10	59231231	59231881	90.17	53.95	331.24	intronic	Cachd1
chr10	59490178	59490628	112.62	174.32	450.5	intronic	Plcb1
chr10	12266771	12267221	168.01	153.71	429.2	intronic	1700049E15Rik
chr10	90501488	90501935	76.16	183.03	457.76	intronic	Mtdh
chr10	93901854	93902304	78.64	85.5	359.22	intergenic	Nav2
chr10	24771789	24772221	122.17	81.98	355.11	intergenic	Ptcd2
chr10	116551703	116552295	53.34	50.11	322.42	intronic	Kidins220
chr10	6754314	6754564	157.18	122.49	394.41	intergenic	Zfp68
chr10	25648222	25648472	186.05	126.48	398.26	intergenic	Stat1
chr10	107389453	107390085	28.34	16.76	288.12	intergenic	Spata17
chr10	24347329	24347979	66.56	84.13	355.36	intergenic	AK002748
chr10	99303760	99304610	54.52	52.49	322.85	intergenic	Plcd4
chr10	111121706	111122150	72.39	152.39	422.36	intergenic	Skp2
chr10	93954022	93954672	63.88	56.46	325.99	intergenic	Serpina3g
chr10	98816013	98816463	132.15	143.26	412.41	intronic	Sema3c
chr10	36986682	36987330	107.6	99.36	364.5	intergenic	Odf3l1
chr10	95127451	95127901	88.66	163.8	428.51	intergenic	Col8a1
chr10	17250799	17251224	107.08	89.33	353.39	intergenic	Gtf2a1l
chr10	63699246	63699890	29.36	22.82	285.98	intronic	Ak5
chr10	126844516	126844924	66.76	74.25	337.35	intronic	Hif1a
chr10	119766566	119767016	53.31	44.38	306.54	intergenic	Gpr137b-ps
chr10	13816916	13817906	57.27	60.94	322.72	intronic	Ptprg
chr10	93391890	93392532	36.88	92.21	352.2	intergenic	Arhgap24
chr10	5229361	5230011	79.79	92.62	351.88	exonic	Cpne8
chr10	123140499	123141149	46.51	34.87	292.14	intronic	Mid1ip1
chr10	68356239	68356689	78.55	80.11	336.62	intergenic	Trim33
chr10	53760033	53760479	62.77	40.55	295.86	intronic	Alb
chr10	19229687	19230261	45.59	47.7	302.74	intergenic	AK017010
chr10	121435774	121436224	102.47	212.86	467.48	intronic	Fzd1
chr10	87378248	87378878	66.66	44.44	298.9	exonic	Rb1
chr10	96388405	96388855	42.51	42.82	297.25	intergenic	Expi
chr10	61792732	61793382	81.52	105.83	358.98	intronic	Dgkg
chr10	67361416	67362221	113.01	95.58	348.62	intronic	Glt1d1
chr10	66843004	66843439	93.79	63.76	316.77	intergenic	Cep78
chr10	66564938	66565518	53.54	77.98	330.84	intronic	AK079812
chr10	121845752	121846175	40.16	61.88	314.49	intergenic	Dapp1
chr10	20764991	20765406	27.39	28.48	280.06	intronic	Nipsnap1
chr10	42843161	42843583	53.57	38.37	289.08	intronic	St3gal5
chr10	119225275	119225833	37.34	33.01	281.9	intronic	AK021232
chr10	58966492	58967072	122.46	79.45	326.8	intronic	Srgap1
chr10	70445962	70446403	46.18	46.48	293.83	intronic	Igf1
chr10	18683397	18684355	64.5	37.28	284.63	intergenic	Slmap
chr10	88311707	88312157	37.24	28.89	275.36	intergenic	Sla2
chr10	118424244	118424694	78.77	121.1	366.82	intergenic	Timp4
chr10	6266385	6266635	140.59	125.14	370.3	intronic	2014-03-01
chr10	43840554	43840983	199.27	93.48	338.45	intergenic	Pth
chr10	95247440	95247865	43.49	41.86	286.81	intronic	BC006965
chr10	94870227	94870875	39.5	64.54	309.19	intronic	Arhgap20
chr10	44560307	44560557	89.77	74.39	317.7	intergenic	Klf6
chr10	119835722	119836162	91.73	136.94	377.15	intronic	Nfyb
chr10	93744909	93745346	59.79	48.45	288.48	intergenic	Inpp5f
chr10	36931975	36932825	68.23	60.1	299.85	intergenic	Dlgap4
chr10	127640600	127641048	58.22	133.29	372.52	promoter	Immp2l
chr10	84893208	84893658	102.93	88.19	327.31	intronic	Eif2b3
chr10	107826799	107827387	77.1	77.85	316.62	intronic	Rnf220
chr10	83523445	83523695	156.27	142.29	380.61	intergenic	AK042998
chr10	120116396	120117046	54.82	55.77	293.9	intergenic	Atp8a1
chr10	114487605	114488055	60.58	70.66	307.92	intergenic	Rap1gap2
chr10	98785908	98786520	71.05	42.89	280.13	intronic	Glg1
chr10	34271481	34271731	48.37	86.14	323.17	intronic	Gm10790
chr10	110232365	110232999	76.61	58.95	295.65	intergenic	Commd8
chr10	83104424	83104858	45.69	49.99	286.48	intronic	Klf12
chr10	84834109	84834550	66.63	67.37	303.21	intergenic	Zcchc24
chr10	38615573	38615823	28.97	31.46	266.44	intergenic	Mobkl2b
chr10	20193366	20193816	136.66	142.57	377.48	intronic	Ttc7b
chr10	68267244	68267800	32.89	39.07	273.97	intergenic	Mef2c
chr10	21455999	21456523	25.1	43.4	277.5	intergenic	C1galt1
chr10	69644309	69644759	86.3	83.23	317.24	intronic	Ate1
chr10	17879678	17879928	113.37	127.92	361.86	intronic	Adh4
chr10	57822514	57823214	51.71	44.24	277.53	intronic	Hebp1
chr10	69669425	69669867	41.33	34.78	266.46	intronic	Sh2d4b
chr10	69708959	69709405	96.28	60.91	292.49	intronic	Magi1
chr10	98593760	98594210	51.35	88.95	320.13	intronic	Lmbr1
chr10	92532190	92532440	140.63	142.47	373.14	intronic	Arid4a
chr10	111152057	111152955	96.97	75.86	306.46	intergenic	Cd28
chr10	124315509	124316127	48.44	28.65	258.81	intergenic	BC021953
chr10	107460205	107460855	32.5	15.92	246.02	intergenic	Kcnh8
chr10	57483483	57484079	58.32	38.55	268.17	intergenic	Wwp2
chr10	39192858	39193108	143.73	144.69	374.15	intronic	Ttc17
chr10	95305474	95305869	69.68	28.57	257.42	intergenic	Arrdc3
chr10	39341947	39342397	70.69	102.02	330.77	intronic	Igf1
chr10	82472659	82472909	83.88	133.9	361.82	intronic	Qpct
chr10	42693597	42694038	60.84	67.71	294.56	intergenic	Ust
chr10	85888353	85888802	66.47	56.23	282.32	intronic	Tmf1
chr10	8810527	8811131	58.19	52.08	277.79	intergenic	Spag17
chr10	93841175	93841619	99.19	90.73	315.73	intronic	B230120H23Rik
chr10	87377678	87378118	78.48	41.98	266.9	exonic	AK079660
chr10	99504698	99505308	76.19	98.45	323.07	intronic	Sntg2
chr10	126282247	126282684	74.29	42.04	266.54	intergenic	Ola1
chr10	17417047	17417657	90.36	125.5	349.72	intergenic	Glul
chr10	68008443	68008877	98.34	133.2	357.2	intergenic	Duxbl
chr10	87322757	87323399	110.71	101.17	324.07	promoter	Tspan3
chr10	92972108	92972553	63.56	122.51	344.45	intronic	Nrg2
chr10	45843617	45844267	29.09	28.05	249.59	intergenic	Kctd12
chr10	9030666	9031316	44.97	47.94	269.25	intergenic	Reg4
chr10	121884314	121884761	119.78	45.82	265.7	promoter	AK006389
chr10	117974905	117975155	84.76	132.7	351.5	intergenic	Chrm1
chr10	37038159	37039009	78.97	70.52	289.02	intergenic	Akr1d1
chr10	40484302	40484922	59.89	44.33	262.69	intronic	Rap2a
chr10	121409117	121409715	65.45	53.11	269.18	intronic	Efna5
chr10	41772024	41772473	34.33	67.29	282.7	intergenic	Lrch1
chr10	17116381	17116824	49.55	35	249.99	intergenic	1300010F03Rik
chr10	20089253	20089897	27.39	49.97	264.62	intergenic	AY512943
chr10	121482142	121482592	45.29	56.78	271.32	intronic	AK016276
chr10	85060616	85061252	69.42	72.53	286.66	promoter	Rad52
chr10	3227902	3228152	96.51	131.75	345.6	intergenic	Slc38a6
chr10	7933009	7933459	104.4	83.25	297.09	intronic	Ptpn14
chr10	98761705	98761955	144.78	103.93	317.53	exonic	Acpl2
chr10	69726594	69727044	86.7	40.67	254.16	intronic	AK010403
chr10	61763327	61763577	131.56	140.01	352.92	intronic	Cul3
chr10	124147803	124148423	29.59	24.66	237.5	intergenic	Umodl1
chr10	107525751	107526185	53.7	56.13	268.69	intergenic	Stat4
chr10	124330248	124331098	25.72	20.14	232.65	intergenic	Zbtb16
chr10	5028479	5028862	99.82	77.6	289.98	intergenic	Gpatch2
[truncated: 19,726 more rows]

## Sheet: duodenum_ileum-specific
Table S5: Differential DHS along the length of the intestine; duodenum_ileum-specific
chrom	start	stop	duodenum_value	ileum_value	colon_value	feature	nearest_gene
chr1	4527359	4527807	249.6	425.54	50.94	intergenic	Sox17
chr1	4588522	4588772	271.11	157.4	48.42	intergenic	Sox17
chr1	9117700	9118300	177.9	177.44	26.73	intronic	Sntg1
chr1	9126502	9126899	143.11	230.42	25.8	intronic	Sntg1
chr1	9138890	9139490	199.76	161.25	21.16	intronic	Sntg1
chr1	9305661	9306076	207.61	175.88	45.59	intergenic	Sntg1
chr1	9371128	9371534	99.06	63.17	5.92	intergenic	Sntg1
chr1	9745747	9746147	138.13	169.91	33.4	intronic	AK006607
chr1	9747003	9747402	113.46	113.62	14.09	intronic	AK006607
chr1	9770443	9770878	292.85	261.12	31.12	exonic	AK006607
chr1	10216961	10217211	174.4	149.31	52.84	intronic	Arfgef1
chr1	10255387	10255781	62.76	101.85	18.46	intergenic	Arfgef1
chr1	10258058	10258308	31.02	57.42	9.81	intergenic	Arfgef1
chr1	13221541	13221791	266.57	242.57	62.05	intronic	Ncoa2
chr1	13314572	13314822	105.34	137.74	33.23	intronic	Ncoa2
chr1	13353828	13354276	205.06	220.99	33.68	intronic	Ncoa2
chr1	15910097	15910347	119.06	99.54	29.64	intergenic	Gm106
chr1	16225035	16225683	532.83	528.94	98.55	intronic	Stau2
chr1	16595017	16595426	107.31	103.03	29.89	intronic	Ube2w
chr1	21087068	21087318	84.33	160.78	41.98	intergenic	Tram2
chr1	21299464	21299714	58.91	61.67	16.82	intergenic	Gm4956
chr1	24754516	24754766	96.8	70.51	14.39	intronic	Lmbrd1
chr1	31084361	31084611	89.47	77.95	16.38	intergenic	Ptp4a1
chr1	31127428	31127678	56.52	37.84	10.6	intergenic	4931428L18Rik
chr1	31154053	31154474	257.59	160.09	32.43	intergenic	4931428L18Rik
chr1	34888012	34888262	86.4	119.33	35.57	intronic	Fam168b
chr1	36021287	36021537	133.4	116.95	30.07	intergenic	AK003327
chr1	36352104	36352354	54.95	73.81	18.89	intergenic	Arid5a
chr1	36402639	36402889	128.38	96	20.6	exonic	4632411B12Rik
chr1	36474192	36474442	207.98	154.73	47.35	intronic	AK132955
chr1	36540734	36541174	140.55	206.48	42.32	intronic	Cnnm4
chr1	36867331	36867923	185.42	249.78	48.94	intronic	Tmem131
chr1	37355836	37356286	253.85	233.49	59.34	promoter	Inpp4a
chr1	37371984	37372234	96.83	122.86	20.95	intronic	Inpp4a
chr1	37410951	37411201	87.02	121.5	35.71	intronic	Inpp4a
chr1	39148497	39148947	449.96	462.66	162.52	intergenic	Pdcl3
chr1	39200454	39200904	345.18	421.34	110.71	intergenic	Npas2
chr1	39285774	39286024	67.84	116.29	24.64	intronic	Npas2
chr1	39316421	39316671	231.47	269.83	78.44	intronic	Npas2
chr1	39317785	39318235	175.83	193.82	43.26	intronic	Npas2
chr1	39389268	39389700	276.2	357.75	85.69	intronic	Npas2
chr1	39533094	39533544	211.24	282.28	64.38	intronic	Tbc1d8
chr1	39622363	39622613	63.82	83.66	18.78	intronic	Rnf149
chr1	39649058	39649308	345.99	423.81	133.03	intergenic	Rnf149
chr1	39805898	39806548	292.55	262.23	52.3	intergenic	Rfx8
chr1	39903971	39904221	132.08	118.22	22.56	promoter	BC048628
chr1	39906564	39906814	87.19	153.56	16.22	intergenic	BC048628
chr1	39998136	39998386	367.2	400.66	83.92	intronic	Map4k4
chr1	40001917	40002167	173.8	197.08	46.06	intronic	Map4k4
chr1	40777228	40777478	98.51	84.29	26.12	intronic	Slc9a2
chr1	40777622	40777872	122.04	72.28	9.26	intronic	Slc9a2
chr1	40816778	40817028	205.26	141.96	53.26	intronic	Slc9a2
chr1	40849814	40850211	88.78	121.6	34.02	intergenic	Mfsd9
chr1	42798306	42798556	288.91	184.25	26.02	intergenic	AK011913
chr1	43204311	43204749	118.27	175.81	18.11	intronic	Fhl2
chr1	43238931	43239181	63.46	124.78	13.34	intronic	Fhl2
chr1	43249230	43249778	196.36	243.31	24.57	intronic	Fhl2
chr1	43294773	43295202	184.27	273.74	50.76	intergenic	Fhl2
chr1	43315876	43316286	312.23	174.8	23.28	intergenic	Fhl2
chr1	43381408	43381658	116.31	143.54	36.05	intergenic	Nck2
chr1	43456158	43456408	113.56	68.97	20.68	intergenic	Nck2
chr1	43480288	43480538	393.99	322.73	98.73	intergenic	Nck2
chr1	43522640	43523090	119.91	247.41	35.68	intronic	Nck2
chr1	44168441	44168861	39.43	86.03	11.37	intronic	Kdelc1
chr1	52315277	52315527	102.76	75.55	22.84	intergenic	Gls
chr1	52342555	52342805	62.34	78.7	19.32	intergenic	Gls
chr1	52806733	52806983	132.08	134.93	42.7	intergenic	Mfsd6
chr1	52811047	52811297	101.61	77.61	19.35	intergenic	Mfsd6
chr1	52865242	52865688	344.2	253.48	23.23	intronic	Inpp1
chr1	53346379	53346806	131.39	158.9	41.35	intronic	Pms1
chr1	53348110	53348360	80.6	79.82	23.86	intronic	Pms1
chr1	53432676	53432926	47.26	23.74	3.11	intergenic	Asnsd1
chr1	53722084	53722334	177.3	192.71	41.53	intergenic	Mir1937b-2
chr1	53852537	53852787	219.65	201.59	70.07	intergenic	Stk17b
chr1	53873142	53873587	313.08	340.75	62.87	intronic	Hecw2
chr1	53903967	53904217	123.84	93.39	26.02	intronic	Hecw2
chr1	54462975	54463225	52.4	68	17.18	intronic	Gtf3c3
chr1	54638517	54638767	136.27	114.76	34.8	intergenic	Pgap1
chr1	54814185	54814435	183.85	96.85	21.23	intronic	Ankrd44
chr1	54828246	54828675	505.18	316.62	57.31	intronic	Ankrd44
chr1	54956071	54956321	298.45	219.63	58.66	intronic	Ankrd44
chr1	55826834	55827645	647.38	738.09	144.05	intergenic	Plcl1
chr1	56669087	56669337	120.57	73.53	18.18	intergenic	Hsfy2
chr1	57030192	57030442	214.87	290.68	52.44	intronic	9130024F11Rik
chr1	58015769	58016189	183.98	156.98	40.88	exonic	Kctd18
chr1	58400598	58401010	245.59	204.38	50.65	intronic	Aox3l1
chr1	58623681	58623931	81.65	60.69	18.54	intronic	Fam126b
chr1	58659487	58659937	176.98	146.97	21.99	intergenic	Ndufb3
chr1	58671210	58671796	290.4	377.52	62.37	intergenic	Ndufb3
chr1	58672494	58672923	153.25	120.07	30.27	intergenic	Ndufb3
chr1	58734872	58735313	344.17	311.29	50.05	exonic	Als2cr12
chr1	58809475	58809888	113.66	136.27	28.61	exonic	Cflar
chr1	58844830	58845080	87.87	105.23	31.88	intergenic	Casp8
chr1	58932910	58933558	483.16	405.95	60.87	intergenic	Trak2
chr1	58980462	58980712	89.54	109.22	28.19	exonic	Trak2
chr1	59002711	59003351	271.42	316.28	59.34	exonic	Trak2
chr1	59182440	59182843	323.76	328.99	61.1	exonic	Mpp4
chr1	59217734	59218169	126.29	122.22	22.33	intronic	Mpp4
chr1	59223087	59223337	152.18	160.58	45.96	intronic	Als2
chr1	59225641	59225891	113.24	91.83	25.09	intronic	Als2
chr1	59226329	59226770	43.76	89.3	13.74	exonic	Als2
chr1	59247192	59247442	38.16	73.31	15.58	intronic	Als2
chr1	59268997	59269247	328.61	330.51	113.5	intronic	Als2
chr1	59269893	59270143	107.44	140.98	38.63	intronic	Als2
chr1	59378336	59378786	280.17	219.41	27.97	intronic	Cdk15
chr1	59450990	59451240	142.82	211.74	60.08	intergenic	Cdk15
chr1	59495835	59496285	508.32	452.04	111.21	intergenic	Fzd7
chr1	59532364	59532614	190.86	238.31	77.15	intergenic	Fzd7
chr1	59597622	59598072	179.34	184.16	46.55	intronic	AK006768
chr1	60028602	60028852	151.43	87.98	25.99	intronic	Fam117b
chr1	60715197	60715647	247.75	247.23	66.87	intergenic	AK217854
chr1	60716568	60716818	36.46	55.91	12.23	intergenic	AK217854
chr1	60890466	60890716	80.77	90.5	26.59	intergenic	AK009383
chr1	60910889	60911539	288.21	296.79	48.6	intergenic	AK009383
chr1	60979949	60980291	32.37	64.65	11.88	intergenic	Ctla4
chr1	60981779	60982029	55.83	61.65	15.68	intergenic	Ctla4
chr1	61758155	61758568	229.26	185.51	18.09	intronic	Pard3b
chr1	62085359	62085764	115.2	150.61	27.05	intronic	Pard3b
chr1	63949080	63949330	113.26	61.65	10.83	intergenic	OTTMUSG00000013918
chr1	63949480	63949730	50.24	74.68	15.37	intergenic	OTTMUSG00000013918
chr1	63949880	63950130	298.88	244.41	49.76	intergenic	OTTMUSG00000013918
chr1	64132006	64132428	189.32	242.43	52.82	intronic	Klf7
chr1	64270858	64271108	280.98	215.64	69.97	intergenic	Klf7
chr1	64321558	64322208	377.72	511.91	53.2	intergenic	Klf7
chr1	64351262	64351512	114.77	95	25.13	intergenic	Klf7
chr1	64808332	64808582	73.7	64.72	17.72	intergenic	Plekhm3
chr1	64996992	64997242	125.27	182.67	39.64	intronic	Plekhm3
chr1	65029249	65029851	328.22	242.73	34.48	intergenic	Plekhm3
chr1	65038914	65039164	125.41	150.53	46.24	intergenic	Akr1cl
chr1	65042199	65042449	128.54	108.55	33.15	intergenic	Akr1cl
chr1	65048033	65048283	43.99	81.9	18.78	intergenic	Akr1cl
chr1	65193273	65193711	164.02	190.27	33.18	intergenic	Idh1
chr1	65202040	65202477	134.08	114.9	24.79	intergenic	Idh1
chr1	66926849	66927295	131.76	176.57	31.12	intergenic	Acadl
chr1	67111833	67112083	104.1	76.47	18.67	intergenic	Lancl1
chr1	67112625	67113073	141.63	148.67	28.18	intergenic	Lancl1
chr1	67125787	67126037	287.65	346.98	100.66	intergenic	Lancl1
chr1	67158180	67158430	110.97	99.02	30.07	intergenic	Cps1
chr1	67169281	67169704	119.18	168.98	23.34	promoter	Cps1
chr1	67172004	67172454	155.54	175.13	32.82	intronic	Cps1
chr1	67174888	67175138	40.75	57.16	6.69	intronic	Cps1
chr1	67306823	67307073	158.95	154.68	40.62	intronic	BC108272
chr1	71077012	71077449	436.54	720.31	141.92	exonic	Bard1
chr1	71102656	71102906	103.84	86.16	16.27	intronic	Bard1
chr1	72219343	72220593	867.82	1292.73	225.51	intronic	Mreg
chr1	72220943	72221193	178.36	147.09	44.18	intronic	Mreg
chr1	72243226	72243674	137.23	173.5	41.75	intronic	Mreg
chr1	72339763	72340013	58.97	89.73	13.09	intronic	Tmem169
chr1	72340357	72340805	161.79	190.51	34.46	intronic	Tmem169
chr1	74376205	74376655	245.12	198.85	40.19	intronic	Pnkd
chr1	74737747	74737997	88.72	48.77	9.4	intronic	Ttll4
chr1	74743972	74744403	277.37	338.36	67.45	exonic	Ttll4
chr1	74745203	74746044	365.9	384.98	64.65	intergenic	Ttll4
chr1	78266125	78266564	378.29	336.71	75.63	intergenic	Sgpp2
chr1	78351219	78351469	94.38	73.29	13.69	intronic	Sgpp2
chr1	78499090	78499522	231.11	214.64	35.58	promoter	BC035947
chr1	79747592	79748034	91.93	114.02	23.84	intronic	Wdfy1
chr1	82780965	82781415	148.41	237.81	44.94	intergenic	Tm4sf20
chr1	82808248	82808824	492.14	615.91	144.52	intergenic	Agfg1
chr1	82823726	82823976	112.21	146.97	42.9	intergenic	Agfg1
chr1	82935207	82935457	51.94	48.93	12.46	intergenic	Agfg1
chr1	82975470	82975720	68.4	44.52	8.45	intergenic	Slc19a3
chr1	82988210	82988460	87.61	130.04	33.9	intergenic	Slc19a3
chr1	83093003	83094053	460.84	392.65	61.94	intergenic	Ccl20
chr1	83117686	83118112	60.44	116.39	10.24	intergenic	Ccl20
chr1	83742672	83742922	149.89	123.68	41.89	intergenic	AK017086
chr1	83743930	83744347	112.19	98.48	18.34	intergenic	AK017086
chr1	84344265	84345097	429.61	339.52	64.56	intergenic	Pid1
chr1	84357963	84358413	457.85	558.06	120.62	intergenic	Dner
chr1	84364096	84364931	541.62	623.69	89.29	intergenic	Dner
chr1	84403344	84403791	332.62	356.68	79.86	intronic	Dner
chr1	87764222	87764644	96.57	75.67	12.35	intergenic	Cab39
chr1	87845693	87846143	213.67	173.5	51.48	intronic	Gpr55
chr1	87860132	87860382	75.01	64.8	17.87	intergenic	Gpr55
chr1	87884930	87885344	236.42	131.5	42.23	intergenic	Gpr55
chr1	88080072	88080722	324.51	451.04	72.26	intronic	Armc9
chr1	88165621	88166065	387.95	637.77	148.08	intronic	Armc9
chr1	88184154	88184577	232.81	311.05	96.74	intergenic	Armc9
chr1	88287630	88287880	156.33	156.01	48.43	intergenic	Nmur1
chr1	88459218	88459643	402.22	663.96	77.77	intronic	Pde6d
chr1	88964106	88964556	306.5	420.33	102.7	intergenic	AK077157
chr1	89021356	89021606	378.9	298.85	79.83	promoter	Akp3
chr1	89450736	89451180	161.14	196.45	42.29	intronic	Ngef
chr1	89519676	89520126	357.24	192.63	49.03	intronic	Inpp5d
chr1	89910347	89910785	159.5	247.85	20.14	intergenic	Usp40
chr1	89915526	89915947	304.89	296.58	76.46	intergenic	Usp40
chr1	89938896	89939270	70	59.38	18.65	intergenic	Ugt1a1
chr1	89943130	89943380	120.92	100.12	26.47	intergenic	Ugt1a1
chr1	89962613	89962863	33.74	28.93	6.67	intronic	Ugt1a1
chr1	90076445	90076695	42.15	55.34	12.02	intronic	Ugt1a1
chr1	90088278	90088528	79.88	127.66	22.42	intronic	Ugt1a1
chr1	90180798	90181048	224.98	306.54	72.97	intergenic	Hjurp
chr1	90184598	90185248	1733.95	1505.3	392.5	intergenic	Hjurp
chr1	90295842	90296289	155.58	199.36	31.72	intergenic	Spp2
chr1	90567445	90567695	84.8	80.67	24.82	intergenic	Arl4c
chr1	90839613	90840043	223.92	179.76	52.28	intergenic	Sh3bp4
chr1	91016844	91017294	362.25	554.62	77.62	intronic	Sh3bp4
chr1	91227685	91228335	268.71	345.67	53.17	intergenic	Agap1
chr1	91310969	91311219	140.82	116.78	35.06	intergenic	Agap1
chr1	91392857	91393300	148.74	271.02	46.71	intronic	Agap1
chr1	91398408	91398658	40.58	87.15	7.4	intronic	Agap1
chr1	91615607	91615857	372.5	262.31	70.32	intronic	Agap1
chr1	91621209	91621659	326.25	463.39	101.3	intronic	Agap1
chr1	91718551	91718801	155.78	87.56	20.73	intronic	mKIAA1099
chr1	91747345	91747595	269.18	178.35	58.89	intronic	Agap1
chr1	91747741	91747991	257.56	171.19	58.13	intronic	Agap1
chr1	92953802	92954249	103.51	186.78	46.85	intronic	Lrrfip1
chr1	93131422	93131672	40.97	68.82	18.1	intergenic	Ramp1
chr1	93197825	93198075	101.06	131.19	36.41	intronic	Scly
chr1	93208887	93209137	109.14	95.96	28.8	intronic	Scly
chr1	93336431	93337049	159.27	191.21	33.49	exonic	Per2
chr1	93345895	93346145	81.49	129.57	11.61	intronic	Per2
chr1	93512046	93512296	368.7	275.7	105.3	intergenic	Asb1
chr1	93885371	93885821	411.48	507.64	100.29	intronic	Hdac4
chr1	94054761	94055011	69.25	84.91	19.53	intronic	Hdac4
chr1	94817502	94817752	229.11	317.5	95.48	exonic	Rnpepl1
chr1	94826766	94827016	63.95	100.6	16.47	intergenic	9430060I03Rik
chr1	94828024	94828421	88.16	112.04	19.02	intergenic	9430060I03Rik
chr1	95064821	95065071	101.16	204.43	50.7	intergenic	2310007B03Rik
chr1	95335922	95336336	190.82	189.47	50.54	intronic	Hdlbp
chr1	95354949	95355341	55.67	66.93	17.38	intronic	Hdlbp
chr1	95538740	95538990	114.97	104.83	33.74	intergenic	Stk25
chr1	95589268	95589518	71.54	63.77	14.88	intronic	Bok
chr1	95600088	95600538	429.05	389.15	109.69	intergenic	Thap4
chr1	95613338	95613747	85.38	81.64	23.46	intronic	Thap4
chr1	95670315	95670565	148.05	231.64	58.66	exonic	Atg4b
chr1	95746085	95746535	72.75	152.64	29.19	intronic	D2hgdh
chr1	95768915	95769165	418.32	276.84	74.77	intronic	Gal3st2
chr1	95789693	95790073	120.66	185.86	40.42	intronic	D2hgdh
chr1	95794205	95794619	147.85	153.42	32.68	intronic	D2hgdh
chr1	95825732	95825982	113.3	186.69	37.31	intergenic	D2hgdh
chr1	95835087	95835337	401.72	246.06	86.48	intergenic	D2hgdh
chr1	95863329	95863751	149.42	139.32	22.58	intergenic	Gm6086
chr1	99601197	99601640	306.7	271.02	47.92	intergenic	Ppip5k2
chr1	100025299	100025549	105.25	121.79	19.44	intergenic	AK007349
chr1	100044323	100044573	31.02	42.82	7.88	intergenic	AK007349
chr1	106938157	106938590	363.5	333.56	73.27	intergenic	Cdh20
chr1	107023128	107023732	199.6	205.4	59.23	intergenic	Cdh20
chr1	107053285	107053535	45.85	94.19	16.71	intergenic	Rnf152
chr1	107246030	107246280	66.92	204.72	14.24	intronic	Rnf152
chr1	107332901	107333334	164.26	216.21	48.36	intergenic	AK039635
chr1	107790021	107790271	36.07	68.23	11.41	intergenic	Tnfrsf11a
chr1	108367491	108367741	79.2	73.76	14.22	intergenic	Bcl2
chr1	108419625	108419875	86.07	58.24	17	intergenic	Bcl2
chr1	108439119	108439369	103.94	264.24	47.96	intronic	AK085305
chr1	108648514	108648960	392.86	350.79	84.97	intronic	Kdsr
chr1	108652985	108653433	286.45	348.9	59.9	intronic	Kdsr
chr1	115090818	115091068	76.74	53.77	8.62	intergenic	Dsel
chr1	115386730	115387780	592.4	667.13	75.73	intergenic	Dsel
chr1	115426923	115427364	227.87	222.25	37.53	intergenic	Dsel
chr1	120325294	120325544	80.64	82.47	25.54	intronic	Clasp1
chr1	120347482	120347732	48.56	87.7	18.92	intronic	Clasp1
chr1	120347842	120348272	126.15	247.36	41.34	intronic	Clasp1
chr1	120821132	120821582	105.41	155.84	31.64	intronic	Gli2
chr1	120827706	120828151	463.92	597.56	102.52	intronic	Gli2
chr1	121289812	121290062	233.77	140.46	39.06	intergenic	AK039419
chr1	121912930	121913180	278.21	303.97	97.48	intronic	Sctr
chr1	121925791	121926241	286.88	351.62	24.78	intronic	Sctr
chr1	121927392	121927642	85.54	133.21	34.15	intronic	Sctr
chr1	121933879	121934313	605.3	565.7	148.48	intronic	Sctr
chr1	122021328	122021778	199.17	302.2	76.53	intronic	3110009E18Rik
chr1	122036817	122037067	260.23	419.69	124.46	intronic	3110009E18Rik
chr1	122037193	122037443	115.98	70.1	14.8	intronic	3110009E18Rik
chr1	123232547	123232797	124.49	163.79	26.11	intergenic	Insig2
chr1	123245614	123246064	116.96	83.21	17.86	intergenic	Insig2
chr1	123358122	123358372	99.42	159.12	29.06	intronic	Ccdc93
chr1	123358884	123359334	193.87	129.07	29.12	intronic	Ccdc93
chr1	123477636	123478276	509.44	472.93	44.62	intergenic	Ddx18
chr1	127370400	127370650	88.36	59.18	16.37	intergenic	Actr3
chr1	127373468	127373894	114.9	128.16	25.06	intergenic	Actr3
chr1	127398422	127399140	202.14	314.85	29.8	intergenic	Slc35f5
chr1	127558631	127559070	351.83	281.18	81.05	intergenic	Gpr39
chr1	127608301	127608698	101.05	101.1	30.92	intronic	Gpr39
chr1	127880943	127881579	673.03	448.93	100.72	intronic	Nckap5
chr1	128548676	128548926	48.92	75.6	12.57	intronic	Nckap5
chr1	128569665	128570281	391.21	399.19	95.48	intronic	Nckap5
chr1	128615656	128616098	215.72	221.12	35.68	intronic	Nckap5
chr1	128616232	128616866	507.08	538.99	87.39	intronic	Nckap5
chr1	128617880	128618130	44.93	67.99	17.17	intronic	Nckap5
chr1	129123936	129124186	80.14	100.88	27.15	intronic	Mgat5
chr1	130211071	130211521	308.47	250.88	48.74	intronic	Lct
chr1	130220056	130220306	113.85	80.68	17.11	intronic	Lct
chr1	130252035	130252285	65.81	62.62	17.68	intronic	Mcm6
chr1	132422399	132423039	299.79	384.42	41.62	intergenic	Zp3r
chr1	132591573	132592020	162.39	105.31	17.88	exonic	Pfkfb2
chr1	132656336	132656586	88.82	165.68	21.92	intergenic	AA986860
chr1	132718611	132718861	249.27	340.7	96.17	intergenic	Pigr
chr1	133019879	133020708	535.82	607.22	169.04	intergenic	Dyrk3
chr1	133022473	133023123	176.85	227.64	58.8	intergenic	Dyrk3
chr1	133695086	133695536	221.47	322.07	71.3	intronic	Pm20d1
chr1	133918601	133918851	66.76	47.03	10.27	intronic	Elk4
chr1	134009759	134010009	274.33	372.94	119.16	intergenic	Cdk18
chr1	134010559	134011009	241.91	224.26	50.13	exonic	Cdk18
chr1	134048515	134048965	268.73	498.81	89.05	intergenic	Cdk18
chr1	134773150	134773400	49.06	54.55	14.55	intergenic	Lrrn2
chr1	134967660	134967910	28.96	57.68	8.52	exonic	Pik3c2b
chr1	135051048	135051298	71.9	45.75	6.78	intergenic	Ppp1r15b
chr1	135182579	135182829	636.14	725.55	227.9	exonic	Plekha6
chr1	135242290	135242540	56.48	118.01	20.28	intergenic	Ren1
chr1	135289205	135289455	44.15	73.4	18.36	promoter	Sox13
chr1	135352714	135353164	193.15	294.34	50.67	intergenic	Sox13
chr1	135406621	135407030	114.21	155.93	42.84	intergenic	Sox13
chr1	135675557	135675807	163.96	304.98	83.16	intronic	Atp2b4
chr1	135844150	135844563	114.94	138.19	21.92	intergenic	Prelp
chr1	136065143	136065593	472.13	805.37	166.13	intergenic	Chi3l1
chr1	136066506	136066895	72.65	86.65	14.32	intergenic	Chi3l1
chr1	136172282	136172532	181.27	248.78	55.38	intergenic	Myog
chr1	136172882	136173132	232.23	154.39	44.27	intergenic	Myog
chr1	136223470	136223920	363.64	508.18	117.77	exonic	Ppfia4
chr1	136254933	136255183	50.5	75.91	18.23	intronic	Tmem183a
chr1	136416550	136416800	53.74	85.51	19.23	intergenic	Rabif
chr1	136555448	136555892	320.52	258.81	77.11	intronic	Syt2
chr1	137037168	137037570	125.7	218.31	56.79	intronic	Ptpn7
chr1	137069776	137070226	75.2	151.63	26.47	intergenic	Gpr37l1
chr1	137131234	137131684	374.65	329.19	30.44	intergenic	Elf3
chr1	137171827	137172121	52.49	53.38	11.52	intronic	Rnpep
chr1	137220031	137220481	278.57	250.85	45.44	promoter	Lmod1
chr1	137810064	137810314	131	117.3	32.84	intronic	Pkp1
chr1	137929354	137929804	284.94	240.69	68.25	intronic	Tmem9
chr1	138053419	138054069	299.05	434.74	40.46	exonic	Kif21b
chr1	138119038	138119288	31.12	56.26	11.22	intronic	5730559C18Rik
chr1	138119838	138120288	90.35	120.27	25.5	exonic	5730559C18Rik
chr1	138461582	138462017	582.8	730.53	148.39	intergenic	Kif14
chr1	138466289	138466539	453.17	415.44	104.03	intergenic	Kif14
chr1	138535001	138535251	75.17	65.52	17.54	intergenic	Zfp281
chr1	138575481	138575916	356.12	183.73	30.53	intergenic	AK051055
chr1	138587080	138587330	37.21	37.42	5.43	intergenic	AK051055
chr1	138647038	138647288	141.31	117.21	32.95	intergenic	AK051055
chr1	138867697	138867947	37.9	75.84	14.74	intergenic	Nr5a2
chr1	145575063	145575611	199.17	220.2	42.48	intergenic	Glrx2
chr1	153005158	153005408	85.54	118.18	31.45	intergenic	Hmcn1
chr1	153832133	153832572	185.45	191.7	34.56	intronic	1700025G04Rik
chr1	154664106	154664756	330.5	536.03	78.7	exonic	Ncf2
chr1	154822457	154822897	136.3	109.44	37.21	intronic	Nmnat2
chr1	154998235	154998647	55.01	77.75	18.02	intronic	Lamc2
chr1	155167992	155168242	120.3	101.16	18.66	intronic	Lamc1
chr1	155353174	155353424	63.1	47.93	10.07	intronic	Npl
chr1	155394866	155395116	64.44	71.52	16.18	intronic	Npl
chr1	155618094	155618544	344.89	400.19	105.28	intergenic	Rnasel
chr1	156912488	156912738	91.63	99.93	28	exonic	AK029591
chr1	156933157	156933407	26.12	45.79	4.48	intergenic	AK029591
chr1	156966004	156966436	124.04	123.18	24.77	intergenic	Mr1
chr1	157099634	157099884	127.53	163.04	37.37	intergenic	BC034090
chr1	157100028	157100278	126.33	86.07	29.34	intergenic	BC034090
chr1	157126406	157126656	129.07	99.67	33.22	exonic	Xpr1
chr1	157791558	157791977	118.99	155.9	29.24	intronic	Cep350
chr1	157842919	157843169	112.59	87.95	16.8	intergenic	Tor1aip1
chr1	158151386	158151836	185.98	192.49	50.3	intergenic	Fam163a
chr1	158423336	158423769	70.07	48.35	13.79	intergenic	Soat1
chr1	158908791	158909041	181.46	187.82	53.35	intergenic	Ralgps2
chr1	159521240	159521490	132.25	105.56	29	intergenic	Sec16b
chr1	162172411	162172661	95.73	139.35	37.16	intronic	Rabgap1l
chr1	162614173	162614757	199.99	193.74	28.18	intronic	Rabgap1l
chr1	163696837	163697285	412.5	457.13	137.82	intergenic	Fasl
chr1	163697431	163697879	513.89	516.57	120.37	intergenic	Fasl
chr1	163896668	163897092	179.89	134.45	40.36	intronic	AK016179
chr1	164797915	164798165	56.51	79.76	11.36	promoter	Fmo1
chr1	164801240	164801490	97.33	114.97	27.79	intergenic	Fmo2
chr1	165219154	165219604	257.26	317.54	34.91	intronic	Prrx1
chr1	166092962	166093412	504.83	488.18	163.54	intronic	F5
chr1	166119822	166120272	163.96	308.01	26.02	exonic	F5
chr1	166142717	166143137	131.85	214.7	32.78	intronic	F5
chr1	166399243	166399493	56.58	74.81	8.63	intergenic	Atp1b1
chr1	166401950	166402200	131.92	172.19	44.08	intergenic	Atp1b1
chr1	166456802	166457410	121.12	210.34	26.53	intergenic	Atp1b1
chr1	166649028	166649437	120.76	107.09	13.94	intergenic	Dpt
chr1	166886958	166887208	102.89	94.27	17.17	intergenic	AK076808
chr1	167071672	167071922	239.59	201.51	67.23	intronic	Tbx19
chr1	167114209	167114620	203.33	190.83	40.56	intronic	Sft2d2
chr1	167147209	167147645	195.9	284.82	42.55	intronic	Tiprl
chr1	167524465	167525315	613.3	606.07	171.48	intronic	Mpzl1
chr1	167991950	167992375	62.87	106.51	15.85	intergenic	Dusp27
chr1	169222489	169222739	60.64	95.53	21.37	intergenic	Uck2
chr1	169283963	169284413	95.37	92.74	20.4	intronic	Aldh9a1
chr1	169284563	169284813	167.59	360.33	66.12	exonic	Aldh9a1
chr1	170160367	170160617	186.73	195.41	41.63	intronic	Pbx1
chr1	170174045	170174495	490	368.01	100.28	intronic	Pbx1
chr1	170256721	170256971	128.03	142.28	45.34	intronic	Pbx1
chr1	170292463	170293113	596.87	673.21	118.81	intronic	Pbx1
chr1	170427953	170428203	106.69	99.93	24.5	intergenic	Pbx1
chr1	170667310	170667749	246.1	262.68	79.73	intergenic	Pbx1
chr1	171851940	171852382	396.99	431.91	122.95	intergenic	1700084C01Rik
chr1	171908737	171909165	129.63	207.9	23.88	intronic	Ddr2
chr1	172317654	172317904	161.73	206.54	56.87	intronic	Nos1ap
chr1	172362299	172362941	593.61	906.08	214.33	intronic	Nos1ap
chr1	172425943	172426393	198.13	347.69	57.03	intronic	Nos1ap
chr1	172468844	172469286	543.9	321.96	45.3	intronic	Nos1ap
chr1	172586587	172587237	674.17	731.52	167.3	intronic	Olfml2b
chr1	172864676	172864926	89.21	77.05	24.2	intergenic	Fcrla
chr1	173100185	173100435	128.42	112.43	22.64	intergenic	Pcp4l1
chr1	173122550	173122800	57.89	103.24	17.65	intronic	Pcp4l1
chr1	173144691	173144941	32.82	56.8	11.81	intronic	Nr1i3
chr1	173355155	173355593	236.97	336.07	29.71	intronic	AK085275
chr1	173454952	173455506	173.05	231.78	38.42	intronic	Itln1
chr1	173969333	173969583	33.28	47.83	10.88	intergenic	Vangl2
chr1	173970117	173970456	67.77	64.8	20.3	intergenic	Vangl2
chr1	174312295	174312545	93.01	130.94	32.12	exonic	Pigm
chr1	174370750	174371000	197.69	272.11	48.38	intergenic	Slamf9
chr1	174393845	174394288	203.23	246.9	49.61	intergenic	Slamf9
chr1	174445856	174446106	104.1	178.61	22.11	intergenic	Ccdc19
chr1	174449260	174449510	23.63	62.43	9.81	promoter	Ccdc19
chr1	177459378	177459628	198.42	100.6	21.97	intergenic	Rgs7
chr1	178748873	178749323	251.36	205.92	69.02	intronic	Sdccag8
chr1	178921065	178921502	184.28	367	72.39	intronic	Sdccag8
chr1	178925662	178925912	158.3	235.29	72.79	intronic	Sdccag8
chr1	178926862	178927112	123.67	113.21	34.99	intronic	Sdccag8
chr1	178943400	178944050	647.54	724.51	129.73	intronic	Sdccag8
chr1	179656127	179656377	335.9	236.18	50.79	intergenic	1700016C15Rik
chr1	179658193	179658443	196.13	338.41	97.62	promoter	1700016C15Rik
chr1	179678506	179678756	192.95	257.17	47.7	intronic	1700016C15Rik
chr1	181523313	181523563	175.82	183.95	52.5	intronic	Cnst
chr1	182140245	182140678	429.53	366.89	78.79	intergenic	Adck3
chr1	182141948	182142198	27.98	46.35	9.05	intergenic	Psen2
chr1	182147086	182147536	123.28	173.6	30.18	intergenic	Psen2
chr1	182160048	182160298	73.08	110.18	28.01	promoter	Psen2
chr1	182178000	182178447	108.85	85.28	18.51	promoter	Psen2
chr1	182229716	182230226	145.76	94.11	9.71	intergenic	Gapdh
chr1	182294148	182294758	469.15	346.68	26.25	intronic	Itpkb
chr1	182464828	182465078	102.54	65.89	18.08	intergenic	Parp1
chr1	182637905	182638155	67.16	72.24	15.81	intergenic	Mixl1
chr1	182650142	182650392	139.09	148.04	37.53	intergenic	Acbd3
chr1	182710478	182710728	66.66	128.5	24.65	intergenic	H3f3a
chr1	182992252	182992864	262.82	291.91	65.9	intergenic	9130409I23Rik
chr1	182993283	182993726	121.02	148.27	38.55	intergenic	9130409I23Rik
chr1	183098952	183099202	127.37	102.71	33.19	exonic	Cnih4
chr1	183176990	183177240	350.05	253.38	61.82	intergenic	Wdr26
chr1	183225814	183226064	60.25	111.79	25.5	intergenic	Cnih3
chr1	183464308	183464558	240.69	331.12	89.18	intergenic	Ccdc121
chr1	185526094	185526344	142.17	149.23	40.85	intergenic	1700056E22Rik
chr1	185588218	185588468	327.94	459.79	105.97	intergenic	1700056E22Rik
chr1	185602029	185602637	188.34	236.63	34.66	intergenic	1700056E22Rik
chr1	185873000	185873250	129.92	156.76	36.19	intronic	Dusp10
chr1	185881172	185881422	63.03	136.49	26.29	intronic	Dusp10
chr1	186633503	186633953	406.79	379.35	104.66	intronic	Mosc1
chr1	187094364	187095014	337.86	461.18	48.68	intronic	Rab3gap2
chr1	187095164	187095614	216.12	229.88	23.06	intronic	Rab3gap2
chr1	187110694	187111144	142.52	145.69	25.77	intronic	Iars2
chr1	187138356	187139006	222.24	208.18	47.17	intronic	Iars2
chr1	187157664	187157914	140.16	208.24	60.78	intronic	Bpnt1
chr1	187266556	187267001	108.13	93.41	22.17	promoter	9630028B13Rik
chr1	187286917	187287167	63	36.39	8.83	intronic	Slc30a10
chr1	187293402	187293652	221.61	168.22	36.75	intergenic	Slc30a10
chr1	187435165	187435615	216.71	258.16	32.38	intergenic	5033404E19Rik
chr1	189060899	189061149	67.94	49.06	11.79	intronic	Gpatch2
chr1	189064171	189064581	214.72	179.39	45.1	intronic	Gpatch2
chr1	191644086	191644336	98.15	95	27.48	intronic	Ptpn14
chr1	191859987	191860237	108.68	142.02	40.85	intergenic	AK083547
chr1	192743345	192743995	320.15	409.35	45.61	intergenic	Angel2
chr1	192853872	192854122	98.93	205.21	26.93	intergenic	A230020J21Rik
chr1	192860254	192861044	327.74	346.86	46.83	promoter	1700022P22Rik
chr1	193000811	193001061	178.43	131.12	34.72	intronic	Atf3
chr1	193099988	193100238	60.48	64.71	16.44	intergenic	Nenf
chr1	193151960	193152410	437.94	359.16	85.93	intronic	Tmem206
chr1	193452845	193453483	576.06	499.13	98.48	intergenic	Ints7
chr1	193462923	193463563	300.68	338.97	62.64	intergenic	Ints7
chr1	193483171	193483421	62.18	39.37	12.95	intergenic	Ints7
chr1	193550838	193551088	91.25	92.72	18.86	intronic	Lpgat1
chr1	193704752	193705202	349.48	521.87	141.03	intergenic	AK076925
chr1	193743222	193743472	101.58	197.09	29.86	intergenic	Slc30a1
chr1	194246411	194246661	51.25	104.22	17.85	intronic	Kcnh1
chr1	194339058	194340308	825.41	939.73	149.17	intronic	Hhat
chr1	194547487	194547737	274.04	178.83	31.8	intronic	Hhat
chr1	194579457	194579707	187.78	110.32	37.58	intronic	Hhat
chr1	194647447	194647697	82.66	126.67	22.54	intergenic	AK006895
chr1	194986474	194986724	166.99	284.06	66.91	intronic	Irf6
chr1	195031868	195032118	56.26	50.91	14.07	promoter	Lamb3
chr1	195137824	195138271	179.76	196.82	34.78	intronic	Lamb3
chr1	195378327	195378943	289.17	390.02	40.74	intergenic	AK014513
chr1	196465926	196466360	209.24	344.37	72.51	intronic	Plxna2
chr1	196510723	196511173	180.35	136.92	25.49	intronic	Plxna2
chr1	196514507	196514757	80.44	83.34	24.85	intronic	Plxna2
chr1	196602716	196603153	213.47	243.37	67.8	intronic	Plxna2
chr1	196824665	196824915	98.53	118.92	30.85	intronic	A330023F24Rik
chr10	3167606	3167856	77.36	119.71	29.65	intronic	Cnksr3
chr10	5672954	5673204	52.76	77.72	19.1	intronic	Esr1
chr10	5853364	5853614	70.72	81.76	19.6	intergenic	Gm221
chr10	6602334	6602721	98.99	165.35	23.01	intronic	Plekhg1
chr10	7434531	7434981	149.62	185.65	35.98	exonic	Lats1
chr10	7465224	7465665	123.99	125.21	32.53	intronic	Katna1
chr10	7492162	7492412	47.26	43.84	8.88	promoter	BC013529
chr10	7557773	7558209	212.44	353.2	62.55	intronic	Zc3h12d
chr10	7776206	7776621	122.92	147.68	27.41	intergenic	Tab2
chr10	7946416	7947266	266.19	217.21	36.9	intronic	Ust
chr10	8524757	8525407	593.9	600.14	159.26	intronic	Sash1
chr10	8623591	8623841	26.77	68.69	11.03	intergenic	Sash1
chr10	8625276	8625715	147.4	217.27	47.98	intergenic	Sash1
chr10	8678938	8679552	336.97	422.5	53.4	intergenic	Sash1
chr10	10034313	10034563	41.79	54.48	13.56	intergenic	9130014G24Rik
chr10	12348406	12348656	105.87	204	31.23	intronic	Utrn
chr10	12507616	12508056	718.27	680.42	207.57	intronic	Utrn
chr10	13164150	13164400	216.9	141.04	40.83	intronic	Phactr2
chr10	13188552	13188802	34.53	68.84	13.23	intronic	Phactr2
chr10	13213650	13214452	319.44	369.78	60.76	intergenic	Fuca2
chr10	13379520	13379953	200.45	261.51	47.92	intronic	Aig1
chr10	17339477	17339727	260.98	170.39	24.6	intergenic	Cited2
chr10	18114266	18114516	81.43	57.95	8.9	intergenic	Nhsl1
chr10	18176428	18176868	131.29	199.55	35.14	intronic	Nhsl1
chr10	18224322	18224572	135.78	129.05	31.58	intronic	Nhsl1
chr10	18806759	18807335	237.39	197.02	55.46	intergenic	AK044491
chr10	18874780	18875030	30.76	70	10.67	intronic	AK044491
chr10	18881787	18882226	234.34	265.8	45.19	intronic	AK044491
chr10	19012315	19012723	82.83	67.98	15.2	intergenic	Olig3
chr10	19246583	19247033	131.89	179.67	45.3	intergenic	AK029599
chr10	19286687	19286937	60.84	46.56	13.6	intergenic	Ifngr1
chr10	19885603	19885853	65.06	89.9	15.27	intronic	Mtap7
chr10	20979625	20979875	109.24	72.61	24.72	intergenic	Hbs1l
chr10	21160777	21161196	396.61	358.73	81.83	intergenic	AK006189
chr10	21167864	21168314	329.53	416.83	78.12	intergenic	AK006189
chr10	21168864	21169114	39.47	62.18	12.98	intergenic	AK006189
chr10	21179679	21180243	270.39	345.45	56.97	intergenic	AK006189
chr10	21217841	21218491	421.99	398.41	70.02	intergenic	AK006189
chr10	21324665	21324915	269.86	314.79	102.36	intronic	1700020N01Rik
chr10	21352028	21352278	78.67	68.01	18.87	intergenic	1700020N01Rik
chr10	21385004	21385654	479.08	278.95	38.02	intergenic	AK090213
chr10	21393567	21394209	187.36	249.06	34.18	intergenic	AK090213
chr10	21567691	21568331	506.62	501	141.49	intergenic	Sgk1
chr10	21578462	21578712	64.37	46.31	13.06	intergenic	Sgk1
chr10	23531773	23532023	380.19	471.66	134.92	intronic	1110021L09Rik
chr10	23552314	23552564	74.45	158.69	26.17	intergenic	1110021L09Rik
chr10	23556091	23556711	378.93	399.2	40.57	intergenic	1110021L09Rik
chr10	23584527	23584777	140.56	136.14	35.89	intronic	Vnn3
chr10	23609393	23609643	88	140.12	16.15	intergenic	Vnn1
chr10	23786441	23786691	158.56	121.13	41.99	intergenic	Taar8a
chr10	23816890	23817140	150.66	120.04	37.47	intergenic	Taar8c
chr10	23823238	23823488	160.25	136.18	41.18	promoter	Taar8c
chr10	24323438	24323855	138.21	126.93	13.62	intergenic	Ctgf
chr10	24717493	24717743	138.69	162.65	38.71	intergenic	Arg1
chr10	25085056	25085306	85.77	106.69	26.77	intronic	Epb4.1l2
chr10	25239548	25240180	646.54	668.83	85.04	intronic	Epb4.1l2
chr10	25255024	25256274	460.44	722.24	133.67	promoter	2010003K15Rik
chr10	25256424	25256674	194.45	267.87	58.63	promoter	2010003K15Rik
chr10	25259213	25260263	392.09	535.96	76.21	intergenic	2010003K15Rik
chr10	25261015	25261265	83.91	151.97	21.35	intergenic	2010003K15Rik
chr10	26040510	26040760	227.6	155.52	35.15	intronic	L3mbtl3
chr10	28017355	28017605	36.88	48.14	10.12	intronic	Ptprk
chr10	30491569	30491819	99.13	61.97	12.04	promoter	Ncoa7
chr10	36867876	36868126	147.13	111.01	40.99	intronic	AK040320
chr10	36981999	36982249	81.13	57.56	14.75	intergenic	AK040320
chr10	39150164	39151011	367.35	370.19	49.13	intronic	Fyn
chr10	39152485	39152921	557.41	427.71	54.44	intronic	Fyn
chr10	39351381	39351831	163.96	169.69	48.11	intronic	AK164126
chr10	39644334	39644755	446.72	486.78	112.21	intronic	2010001E11Rik
chr10	39775488	39775913	118.27	264.7	25.51	intronic	Slc16a10
chr10	39793587	39793837	168.47	179.53	31.25	intronic	Slc16a10
chr10	39808631	39808881	137.52	140.22	31.1	intronic	Slc16a10
chr10	39871793	39872043	270.38	387.55	93.49	intergenic	Slc16a10
chr10	39872375	39872625	104.91	101.92	24.95	intergenic	Slc16a10
chr10	39908473	39909093	259.38	341.6	85.18	intergenic	Rpf2
chr10	40061771	40062327	162.72	129.79	22.59	intronic	Cdk19
chr10	40211037	40211287	78.35	66.72	18.06	intergenic	Cdk19
chr10	40212037	40212287	175.78	96.59	13.16	intergenic	Cdk19
chr10	40741078	40741328	49.22	94.55	16.51	intergenic	Gpr6
chr10	40980206	40980656	266.98	224.86	57.53	intronic	Fig4
chr10	41188978	41189228	83.45	52.89	10.98	intergenic	Zbtb24
chr10	41189343	41189787	137.12	96.02	26.2	intergenic	Zbtb24
chr10	41190401	41190651	63.13	83.38	20.78	intergenic	Zbtb24
chr10	41329264	41329514	301.04	368.7	107.13	intergenic	Ccdc162
chr10	41489101	41489351	232.09	218.46	66.07	intronic	BC048559
chr10	41540764	41541414	400.28	540.75	98.57	intronic	Sesn1
chr10	41672976	41673748	789.97	781.06	100	intronic	Armc2
chr10	41676370	41676772	78.18	73.03	16.52	intronic	Armc2
chr10	41721031	41721517	59.92	123.35	20.38	intronic	Armc2
chr10	41823468	41823901	229.73	366.38	97.41	intergenic	AK008417
chr10	41945480	41945730	252.83	319.4	84.47	intronic	Foxo3
chr10	41949961	41950211	227.54	249.18	67.6	intronic	Foxo3
chr10	41950361	41950611	168.51	254.75	75.82	intronic	Foxo3
chr10	41955140	41955390	143.7	172.53	52.12	intronic	Foxo3
chr10	41959058	41959505	239.82	336.93	98.02	intronic	Foxo3
chr10	41973773	41974023	58.15	78.5	19.54	intronic	Foxo3
chr10	41987863	41988113	104.52	84.23	21.21	intronic	Foxo3
chr10	42061702	42061952	259.18	224.54	73.59	intronic	Lace1
chr10	42212887	42213314	94.16	88.2	17.17	intergenic	Snx3
chr10	42381575	42382157	157.18	346.97	38.36	intergenic	Ostm1
chr10	42612746	42612996	103.77	79.34	20.89	intronic	Scml4
chr10	42671844	42672094	142.32	114.67	20.08	intronic	Scml4
chr10	42965610	42966050	112.48	134.75	30.77	intronic	Pdss2
chr10	43094942	43095192	57.8	45.41	10.01	intronic	Pdss2
chr10	43168554	43168945	217.4	184.4	62.15	intronic	Pdss2
chr10	43476214	43476464	105.84	90.85	23.37	intergenic	Qrsl1
chr10	43663678	43663928	185.98	182.85	36.24	intronic	Rtn4ip1
chr10	44133016	44133266	154.03	109.57	20.19	intergenic	Prdm1
chr10	44140282	44140532	62.97	116.64	19.83	intergenic	Prdm1
chr10	44635663	44635913	229.18	164.37	31.92	intergenic	Prep
chr10	44820225	44820675	599.64	341.14	80.25	intronic	Prep
chr10	44831708	44831958	172.36	279.91	75.43	intronic	Prep
chr10	45370990	45371240	93.83	89.15	13.69	intronic	Hace1
chr10	51801506	51801956	89.8	70.42	13.04	exonic	Ros1
chr10	51945499	51945749	74.61	105.87	27.53	intergenic	Dcbld1
chr10	53335738	53335988	49.71	50.38	13.5	exonic	Mcm9
chr10	53336738	53337188	157.61	195.52	58.1	intronic	Mcm9
chr10	53837493	53837743	77.3	66.33	19.22	intergenic	AK138755
chr10	53838051	53838301	141.67	87.22	20.01	intergenic	AK138755
chr10	53840261	53840711	143.63	249.33	39.41	intergenic	AK138755
chr10	58892460	58892910	82.57	137.22	33.65	intronic	Oit3
chr10	58893060	58894110	720.41	905.39	137.67	exonic	Oit3
chr10	58939794	58940044	119.68	233.56	30.99	intronic	Ccdc109a
chr10	59070357	59070607	102.89	101.95	20.47	intronic	Ccdc109a
chr10	59109440	59110042	462.16	405.69	76.23	intergenic	Ccdc109a
chr10	59141825	59142471	412.67	482.79	118.56	intergenic	Cbara1
chr10	59149784	59150218	351.99	396.01	83.31	intergenic	Cbara1
chr10	59498559	59498809	188.41	131.87	46.35	intronic	Ascc1
chr10	59677796	59678046	240.5	158.17	53.82	intronic	Chst3
chr10	60230070	60230519	529.06	838.17	238.49	intronic	Unc5b
chr10	60548160	60548410	49.19	127.16	11.98	intergenic	Pcbd1
chr10	60612305	60612555	160.42	308.69	52.96	promoter	Sgpl1
chr10	60911523	60911773	60.02	58.52	16.03	intronic	Eif4ebp2
chr10	61159749	61160199	256.18	220.21	68.21	intronic	Tysnd1
chr10	61399970	61400220	157.98	128.08	42.35	intronic	Col13a1
chr10	61468542	61468980	206.67	257.65	58.69	intergenic	Col13a1
chr10	61887931	61888181	289.47	321.05	72.95	intergenic	Hkdc1
chr10	61984539	61984989	527.34	565.04	81.32	intergenic	Srgn
chr10	61991247	61991665	304.61	298.63	57.64	intergenic	2510003E04Rik
chr10	62130836	62131272	420.21	274.68	51.15	intronic	Stox1
chr10	62514718	62515148	110.81	183.43	28.94	exonic	Pbld2
chr10	62530145	62530395	64.86	77.66	21.8	exonic	Pbld1
chr10	62799691	62799941	229.91	306.58	43.44	intronic	Sirt1
chr10	66372783	66373433	496.09	583.3	126.56	intergenic	AK079018
chr10	66385176	66385626	238.89	384.69	92.34	intergenic	AK079018
chr10	66408769	66409019	92.25	136.14	32.36	intergenic	AK079018
chr10	66476953	66477364	93.53	69.8	13.25	intronic	AK079018
chr10	66550405	66551015	228.72	308.82	64.39	intronic	Reep3
chr10	66761572	66761983	256.81	187.53	30.68	intergenic	Nrbf2
chr10	67629940	67630190	184.05	139.85	37.78	intronic	Arid5b
chr10	69135349	69135775	383.84	385.31	119.53	intronic	Ank3
chr10	69398085	69398335	32.23	56.36	8.85	intronic	Ank3
chr10	69540822	69541627	374.62	347.32	46.37	intergenic	Ccdc6
chr10	74517629	74517879	159.94	243.86	67.24	intergenic	Rab36
chr10	74590317	74590567	73.24	105.43	18.93	intronic	Bcr
chr10	74604475	74604725	31.25	58.35	7.29	intronic	Bcr
chr10	74670871	74671121	128.81	181.25	48.36	intergenic	Specc1l
chr10	74683383	74683756	51.67	67.14	15.39	intronic	Specc1l
chr10	74887398	74887648	100.05	136.23	30.65	intronic	1110038D17Rik
chr10	74973860	74974295	88.13	117.91	19.26	promoter	1110038D17Rik
chr10	74998266	74998760	103.97	127.72	24.65	intergenic	Snrpd3
chr10	75026519	75026969	269.78	567.77	73.64	intergenic	AI646023
chr10	75031724	75031974	127.43	198.81	42.15	intronic	Ggt1
chr10	75106879	75107329	368.87	541.14	107.12	promoter	Susd2
chr10	75114246	75114496	138.01	290.71	33.21	intronic	Cabin1
chr10	75116846	75117296	88.56	155.95	36.02	intronic	Cabin1
chr10	75146744	75147394	896.46	1222.28	140.47	exonic	Cabin1
chr10	75335414	75335864	198.85	258.54	54.74	intergenic	DQ707749
chr10	75534749	75535199	111.53	143.14	31.39	exonic	Slc5a4b
chr10	75573613	75574049	162.12	306.86	36.48	promoter	Slc5a4b
chr10	75582852	75583302	141.38	262.96	51.74	intergenic	Slc5a4b
chr10	75600813	75601063	42.68	71.48	12.34	intergenic	Slc5a4a
chr10	75614070	75614320	76.09	85.88	14.6	intronic	Slc5a4a
chr10	75680925	75681175	80.67	193.17	20.68	intronic	Prmt2
chr10	76484989	76485239	119.25	202.44	54.39	intergenic	AK143813
chr10	76511039	76511289	114.6	89.6	20.16	intronic	Slc19a1
chr10	76991226	76991476	92.45	114.44	27.56	promoter	Itgb2
chr10	77134132	77134582	229.12	280.75	58.64	intergenic	DQ696666
chr10	77362889	77363139	179.11	164.98	49.34	exonic	Lrrc3
chr10	77660452	77660702	109.73	91.71	19.57	exonic	Trappc10
chr10	77786279	77786529	103.44	71.81	23.81	intronic	Agpat3
chr10	77945924	77946174	152.15	122.31	26.25	intergenic	Pdxk
chr10	78070372	78070622	64.28	54.89	15.28	intergenic	Olfr1357
chr10	79276817	79277445	235.46	347.56	70.93	intronic	Palm
chr10	79288679	79288929	69.57	155.3	23.79	exonic	9130017N09Rik
chr10	79429833	79430272	327.66	314.05	53.13	exonic	Wdr18
chr10	79466151	79466401	84.54	114.69	20.73	intronic	Abca7
chr10	79513536	79513786	72	103.14	20.82	intronic	Gpx4
chr10	79519536	79519786	151.89	224.97	25.68	exonic	Sbno2
chr10	79557451	79557701	93.53	102.64	25.39	intronic	Sbno2
chr10	79575987	79576237	63.49	113.72	13.6	intergenic	Stk11
[truncated: 6,547 more rows]

## Sheet: duodenum_colon-specific
Table S5: Differential DHS along the length of the intestine; duodenum_colon-specific
[truncated: 245 more rows]

[truncated: 1 more sheets: ileum_colon-specific]
