# Supplementary material for: Microbiota modulate transcription in the intestinal epithelium without remodeling the accessible chromatin landscape
Source: HighWire-hosted journal article supplement (doi:10.1101/gr.165845.113), 2014-06-24
Supplement: Supplemental_TableS7.xlsx [file Supplemental_TableS7.xlsx]

## Sheet: CRvs.CV_ileum_FDR<0.0001
Table S7: DHS putatively differential in the presence and absence of microbiota at FDR < 0.0001
chrom	start	stop	genic feature	nearest gene	Direction
chr1	138272762	138273012	intergenic	Camsap1l1	CV
chr11	3025165	3025415	promoter	Pisd-ps1	CV
chr11	3026365	3026815	intronic	Pisd-ps1	CV
chr11	88584445	88584695	intronic	AK214167	CV
chr14	40876566	40876942	intergenic	AK007151	CV
chr17	81951637	81952047	intronic	Slc8a1	CV
chr2	150856146	150856396	exonic	Nanp	CV
chr3	115226477	115226727	intergenic	S1pr1	CV
chr3	129668412	129668749	intronic	Ccdc109b	CV
chr8	9963620	9963956	intergenic	Lig4	CV
chr8	108581157	108581469	promoter	Nfatc3	CV
chr9	75016057	75016378	intronic	Myo5a	CV
chrX	70904429	70904679	intronic	Pnck	CV
chrX	72909128	72909378	intergenic	4933407K13Rik	CV
chrX	92043625	92044075	promoter	Zxda	CV
chr7	87697857	87698107	intergenic	Blm	CR

## Sheet: CRvs.CV_ileum_FDR<0.05
Table S7: DHS putatively differential in the presence and absence of microbiota at FDR < 0.05
chrom	start	stop	genic feature	nearest gene	Direction
chr1	4322528	4322910	intronic	Rp1	CV
chr1	8273645	8273895	intergenic	Sntg1	CV
chr1	25552171	25552421	intronic	Bai3	CV
chr1	27101558	27101808	intergenic	4931408C20Rik	CV
chr1	27102113	27102363	intergenic	4931408C20Rik	CV
chr1	31380344	31380594	intergenic	Gm4850	CV
chr1	31420787	31421429	intergenic	Gm4850	CV
chr1	40476675	40476925	intergenic	Il1rl1	CV
chr1	42186970	42187530	intergenic	2610017I09Rik	CV
chr1	42220457	42220707	intergenic	2610017I09Rik	CV
chr1	42225919	42226169	intergenic	2610017I09Rik	CV
chr1	42561743	42561993	intergenic	2610017I09Rik	CV
chr1	46474413	46474663	intergenic	AK219219	CV
chr1	46906898	46907148	intronic	Slc39a10	CV
chr1	56240752	56241002	intergenic	AK005643	CV
chr1	56314309	56314559	intergenic	AK005643	CV
chr1	56346294	56346544	intergenic	AK005643	CV
chr1	56423953	56424203	intergenic	Hsfy2	CV
chr1	56669485	56669735	intergenic	Hsfy2	CV
chr1	58639690	58639940	intronic	Fam126b	CV
chr1	67160148	67160398	intergenic	Cps1	CV
chr1	67162711	67162961	intergenic	Cps1	CV
chr1	67164570	67164820	intergenic	Cps1	CV
chr1	68589593	68589843	intronic	Erbb4	CV
chr1	72121115	72121365	intergenic	Mreg	CV
chr1	82698366	82698692	intronic	AK043693	CV
chr1	83903842	83904092	intronic	AK017086	CV
chr1	84730684	84730934	intronic	Trip12	CV
chr1	87508585	87508835	intronic	Sp140	CV
chr1	104520302	104520552	intergenic	AK076805	CV
chr1	104523802	104524052	intergenic	AK076805	CV
chr1	105385715	105386162	intergenic	Cdh20	CV
chr1	105659590	105659840	intergenic	Cdh20	CV
chr1	109734524	109734774	intergenic	AK085943	CV
chr1	110489614	110490045	intergenic	AK085943	CV
chr1	130031353	130031603	intronic	R3hdm1	CV
chr1	131814032	131814282	intronic	Thsd7b	CV
chr1	138272762	138273048	intergenic	Camsap1l1	CV
chr1	142312521	142312771	intronic	Kcnt2	CV
chr1	148203950	148204200	intergenic	AK158929	CV
chr1	153606688	153607096	intronic	Edem3	CV
chr1	159271325	159271575	intronic	Rasal2	CV
chr1	159271725	159271975	intronic	Rasal2	CV
chr1	161184812	161185062	intronic	Rfwd2	CV
chr1	162515444	162515855	intronic	Rabgap1l	CV
chr1	162516936	162517186	intronic	Rabgap1l	CV
chr1	162615534	162615784	intronic	Rabgap1l	CV
chr1	162619284	162619534	intronic	Rabgap1l	CV
chr1	170828328	170828578	intergenic	Pbx1	CV
chr1	175886277	175886527	intergenic	Ifi202b	CV
chr10	5065646	5065896	intergenic	Syne1	CV
chr10	5152571	5152821	intronic	Syne1	CV
chr10	5153087	5153337	intronic	Syne1	CV
chr10	34138968	34139218	promoter	Nt5dc1	CV
chr10	34265752	34266161	intronic	Frk	CV
chr10	36266489	36266832	intronic	Hs3st5	CV
chr10	37859550	37859800	intergenic	AK016383	CV
chr10	40268109	40268359	intergenic	Slc22a16	CV
chr10	47501078	47501389	intergenic	Grik2	CV
chr10	51331870	51332120	intergenic	Gprc6a	CV
chr10	54934820	54935137	intergenic	D630037F22Rik	CV
chr10	84488558	84488808	intergenic	Ric8b	CV
chr10	89820625	89820875	intronic	Anks1b	CV
chr10	95540445	95540695	intergenic	Eea1	CV
chr10	97478068	97478318	intergenic	Gm10754	CV
chr10	97491882	97492266	intergenic	Gm10754	CV
chr10	98145870	98146120	intergenic	Atp2b1	CV
chr10	98149043	98149293	intergenic	Atp2b1	CV
chr10	98816884	98817134	intronic	AK083606	CV
chr10	99518464	99518714	intronic	Kitl	CV
chr10	101845895	101846268	intronic	Mgat4c	CV
chr10	103889041	103889291	intergenic	Gm4340	CV
chr10	106788432	106788882	intronic	Lin7a	CV
chr10	106790116	106790366	intronic	Lin7a	CV
chr10	124608564	124608814	intergenic	Slc16a7	CV
chr11	3023742	3023992	promoter	Pisd-ps1	CV
chr11	3024142	3024592	promoter	Pisd-ps1	CV
chr11	3025165	3025415	promoter	Pisd-ps1	CV
chr11	3025765	3026015	promoter	Pisd-ps1	CV
chr11	3026165	3026815	intronic	Pisd-ps1	CV
chr11	3027965	3028215	intronic	Pisd-ps1	CV
chr11	12773819	12774201	intergenic	Cobl	CV
chr11	17722352	17722681	intergenic	Etaa1	CV
chr11	21016447	21016697	intronic	Peli1	CV
chr11	21190788	21191038	exonic	Vps54	CV
chr11	22072970	22073220	promoter	Ehbp1	CV
chr11	25057372	25057622	intergenic	AK016948	CV
chr11	29618717	29618967	exonic	Rtn4	CV
chr11	29845785	29846035	intronic	Eml6	CV
chr11	30992952	30993202	intronic	Asb3	CV
chr11	74097873	74098123	intronic	Olfr59	CV
chr11	80437955	80438205	intronic	Myo1d	CV
chr11	84069360	84069610	intronic	Acaca	CV
chr11	88584380	88584695	intronic	AK214167	CV
chr11	105158655	105159006	intronic	Mrc2	CV
chr11	108527866	108528284	intronic	Ccdc46	CV
chr12	3109930	3110180	intergenic	1700012B15Rik	CV
chr12	31539159	31539409	intergenic	Fam150b	CV
chr12	32397742	32397992	intronic	Gpr22	CV
chr12	35737984	35738234	intronic	Snx13	CV
chr12	36217800	36218050	intronic	Ahr	CV
chr12	37517232	37517482	intergenic	Ispd	CV
chr12	37967474	37967724	promoter	Tmem195	CV
chr12	37968266	37968516	exonic	Tmem195	CV
chr12	40391930	40392180	intergenic	Arl4a	CV
chr12	40866526	40866954	intergenic	Scin	CV
chr12	42045005	42045255	intronic	Immp2l	CV
chr12	44985136	44985386	intergenic	Dnajb9	CV
chr12	48151058	48151308	intergenic	Nova1	CV
chr12	51221464	51221714	intergenic	Prkd1	CV
chr12	51225231	51225481	intergenic	Prkd1	CV
chr12	52734416	52734666	exonic	Strn3	CV
chr12	52749259	52749623	promoter	Strn3	CV
chr12	55959069	55959319	intergenic	Cfl2	CV
chr12	58525800	58526050	intronic	Mipol1	CV
chr12	59177661	59177911	intergenic	Sstr1	CV
chr12	65375011	65375261	intergenic	Fscb	CV
chr12	65436330	65436580	intergenic	Fscb	CV
chr12	68225325	68225575	intronic	Mdga2	CV
chr12	70223929	70224179	intergenic	Rps29	CV
chr12	75905027	75905277	intergenic	Kcnh5	CV
chr12	79478128	79478378	intronic	Gphn	CV
chr12	82619128	82619521	intronic	Synj2bp	CV
chr12	91235647	91235898	intronic	Nrxn3	CV
chr12	93638838	93639117	intergenic	Sel1l	CV
chr12	98299985	98300235	intergenic	AK145433	CV
chr13	5366695	5366945	intergenic	AK006031	CV
chr13	5422294	5422898	intergenic	AK006031	CV
chr13	5424956	5425206	intergenic	AK006031	CV
chr13	5544502	5544752	intergenic	AK006031	CV
chr13	5916815	5917065	intergenic	Klf6	CV
chr13	5919776	5920026	intergenic	Klf6	CV
chr13	5920343	5920593	intergenic	Klf6	CV
chr13	9010924	9011174	intergenic	Gtpbp4	CV
chr13	9011258	9011508	intergenic	Gtpbp4	CV
chr13	9095630	9095880	intronic	Larp4b	CV
chr13	16383856	16384106	intergenic	Inhba	CV
chr13	46791732	46791982	intronic	Nup153	CV
chr13	63917280	63917730	intronic	0610007P08Rik	CV
chr13	63943078	63943328	exonic	0610007P08Rik	CV
chr13	74777923	74778173	intronic	Erap1	CV
chr13	74783839	74784164	exonic	Erap1	CV
chr13	74834315	74834727	intronic	Cast	CV
chr13	74944818	74945068	intronic	Cast	CV
chr13	77578158	77578408	intronic	2210408I21Rik	CV
chr13	81526315	81526565	intronic	Gpr98	CV
chr13	83747639	83747889	intronic	Mef2c	CV
chr13	83748272	83748522	intronic	Mef2c	CV
chr13	86562356	86562606	intergenic	Cox7c	CV
chr13	95890221	95890471	intronic	Pde8b	CV
chr13	101097928	101098333	intergenic	Naip6	CV
chr13	104649110	104649360	intronic	Erbb2ip	CV
chr13	108838617	108838867	exonic	2810008M24Rik	CV
chr13	109754472	109754722	intronic	Pde4d	CV
chr13	109886421	109886671	intronic	Pde4d	CV
chr13	109886813	109887259	intronic	Pde4d	CV
chr13	110211922	110212172	intronic	Pde4d	CV
chr13	110308975	110309398	intronic	Pde4d	CV
chr13	113253551	113253801	promoter	Il6st	CV
chr13	115966484	115966734	intergenic	Itga1	CV
chr13	118816281	118816531	intergenic	Hcn1	CV
chr14	12718859	12719109	intronic	Ptprg	CV
chr14	17917002	17917252	intergenic	Rarb	CV
chr14	32145481	32145931	intergenic	Capn7	CV
chr14	36765082	36765381	intergenic	4930596D02Rik	CV
chr14	40876566	40877068	intergenic	AK007151	CV
chr14	45418756	45419006	intergenic	DQ552812	CV
chr14	45441041	45441291	intergenic	Ptgdr	CV
chr14	71067006	71067256	intronic	Xpo7	CV
chr14	76751335	76751698	intergenic	Tsc22d1	CV
chr14	87236673	87236923	intronic	Diap3	CV
chr14	94241946	94242196	intronic	Pcdh9	CV
chr14	98246747	98247197	intronic	Dach1	CV
chr14	98258366	98258616	intronic	Dach1	CV
chr14	102951849	102952099	intergenic	Kctd12	CV
chr14	106553789	106554039	intergenic	Trim52	CV
chr14	110097219	110097541	intergenic	Slitrk1	CV
chr14	110814716	110815138	intergenic	Slitrk6	CV
chr14	110815772	110816210	intergenic	Slitrk6	CV
chr14	110844872	110845166	intergenic	Slitrk6	CV
chr14	111127862	111128112	intergenic	Slitrk6	CV
chr14	111153558	111153808	intronic	Slitrk6	CV
chr14	111945451	111945701	intergenic	Slitrk5	CV
chr14	115225998	115226622	intergenic	AK015607	CV
chr15	5442872	5443122	intergenic	BC023070	CV
chr15	5766257	5766657	intergenic	BC023070	CV
chr15	5975289	5975539	intergenic	Dab2	CV
chr15	5975689	5975939	intergenic	Dab2	CV
chr15	13804546	13804839	intergenic	Cdh6	CV
chr15	16916149	16916399	intergenic	Cdh9	CV
chr15	16978912	16979162	intergenic	Cdh9	CV
chr15	41485241	41485630	intronic	Oxr1	CV
chr15	52785531	52785781	intergenic	Ext1	CV
chr15	85079063	85079313	intronic	Fbln1	CV
chr15	89037875	89038125	intergenic	Ppp6r2	CV
chr15	91719789	91720086	intronic	Muc19	CV
chr16	3115241	3115491	intergenic	Olfr161	CV
chr16	3115838	3116088	intergenic	Olfr161	CV
chr16	11143852	11144102	intronic	Zc3h7a	CV
chr16	13061580	13061830	intergenic	Ercc4	CV
chr16	22256777	22257027	intronic	Tra2b	CV
chr16	25953548	25953943	intergenic	Leprel1	CV
chr16	26686090	26686340	intronic	Il1rap	CV
chr16	30216995	30217283	intergenic	Cpn2	CV
chr16	33749937	33750187	intronic	Heg1	CV
chr16	39667873	39668123	intergenic	Lsamp	CV
chr16	46849166	46849416	intergenic	Pvrl3	CV
chr16	54229989	54230239	intergenic	Zpld1	CV
chr16	56795335	56795585	intronic	Gpr128	CV
chr16	58726404	58726654	promoter	Cldnd1	CV
chr16	61056113	61056488	intergenic	Epha6	CV
chr16	64872922	64873172	intergenic	Cggbp1	CV
chr16	66013844	66014241	intergenic	Vgll3	CV
chr16	66022289	66022539	intergenic	Vgll3	CV
chr16	66145458	66145908	intergenic	Vgll3	CV
chr16	68428724	68429136	intergenic	Cadm2	CV
chr16	68826153	68826403	intergenic	Speer2	CV
chr16	68951779	68952401	intergenic	Speer2	CV
chr16	70214258	70214508	intergenic	Gbe1	CV
chr16	75768211	75768461	promoter	Hspa13	CV
chr16	78603160	78603610	intergenic	D16Ertd472e	CV
chr16	78969463	78969713	intronic	Tmprss15	CV
chr16	84016973	84017373	intergenic	AK019711	CV
chr16	86318712	86318962	intergenic	Adamts5	CV
chr16	86319225	86319475	intergenic	Adamts5	CV
chr16	86419674	86420064	intergenic	AK085480	CV
chr16	86766971	86767221	intergenic	AK085480	CV
chr16	88072757	88073200	intronic	Grik1	CV
chr17	3083839	3084689	promoter	Pisd-ps2	CV
chr17	8143103	8143547	intronic	Rsph3a	CV
chr17	8144788	8145038	intronic	Rsph3a	CV
chr17	16605584	16605834	intergenic	Zfp960	CV
chr17	17900016	17900266	intergenic	Vmn2r90	CV
chr17	20208894	20209344	intergenic	Vmn2r104	CV
chr17	24300832	24301082	promoter	Amdhd2	CV
chr17	33392204	33392654	promoter	Zfp955a	CV
chr17	50431246	50431496	intronic	Dazl	CV
chr17	53001548	53001799	intronic	Kcnh8	CV
chr17	63222099	63222394	intronic	Efna5	CV
chr17	63692280	63692530	intronic	Fbxl17	CV
chr17	77398570	77398820	intergenic	Gm4710	CV
chr17	77483659	77483909	intergenic	AK144664	CV
chr17	77495738	77495988	intergenic	AK144664	CV
chr17	77599620	77600054	intergenic	AK144664	CV
chr17	77851594	77851844	intergenic	AK144664	CV
chr17	81951637	81952047	intronic	Slc8a1	CV
chr17	84767476	84767726	intronic	Thada	CV
chr17	91334219	91334469	intronic	Nrxn1	CV
chr17	91637892	91638142	intergenic	Nrxn1	CV
chr18	3335251	3335657	promoter	Gm6225	CV
chr18	3542460	3542710	intergenic	Bambi	CV
chr18	11819459	11819709	intronic	Rbbp8	CV
chr18	11820659	11820909	intronic	Rbbp8	CV
chr18	16190941	16191191	intergenic	Chst9	CV
chr18	20097652	20097902	intergenic	Dsc3	CV
chr18	28393435	28393838	intergenic	AK076809	CV
chr18	30685193	30685443	intergenic	Pik3c3	CV
chr18	33371703	33371953	intronic	Stard4	CV
chr18	46747822	46748072	exonic	Tmed7	CV
chr18	51272575	51272825	intergenic	Prr16	CV
chr18	51290439	51290689	intronic	Prr16	CV
chr18	55923237	55923487	intergenic	Gramd3	CV
chr18	84604771	84605021	intronic	Zfp407	CV
chr18	84673492	84673742	intronic	Zfp407	CV
chr18	87210536	87210873	intergenic	Cbln2	CV
chr19	14823290	14823540	intergenic	Tle4	CV
chr19	34149070	34149320	intronic	Lipn	CV
chr19	34152477	34152727	intronic	Lipn	CV
chr19	34153023	34153273	intronic	Lipn	CV
chr19	48922350	48922600	intergenic	Sorcs3	CV
chr19	61277842	61278221	intergenic	Csf2ra	CV
chr2	15456240	15456490	intergenic	Arl5b	CV
chr2	15823358	15823608	intergenic	Plxdc2	CV
chr2	18060141	18060391	intronic	Mllt10	CV
chr2	22594714	22594964	intergenic	Apbb1ip	CV
chr2	34100392	34100642	intronic	Pbx1	CV
chr2	37364235	37364485	exonic	Rabgap1	CV
chr2	38020350	38020600	intronic	Dennd1a	CV
chr2	39064716	39065102	intronic	Ppp6c	CV
chr2	45364445	45364695	intergenic	AK006114	CV
chr2	45812600	45812850	intergenic	AK006114	CV
chr2	47856650	47856900	intergenic	Acvr2a	CV
chr2	50591194	50591444	intergenic	Gm13498	CV
chr2	54089276	54089526	intergenic	Rprm	CV
chr2	54089662	54089912	intergenic	Rprm	CV
chr2	62427929	62428179	intergenic	Ifih1	CV
chr2	62745516	62745766	intronic	Kcnh7	CV
chr2	69193642	69193892	intergenic	Abcb11	CV
chr2	84081290	84081540	intergenic	Calcrl	CV
chr2	84178027	84178457	intronic	Calcrl	CV
chr2	84219131	84219381	intronic	Calcrl	CV
chr2	85565847	85566097	intergenic	Olfr1009	CV
chr2	86001205	86001576	promoter	Olfr1042	CV
chr2	98502339	98502789	intergenic	Lrrc4c	CV
chr2	98502939	98503189	intergenic	Lrrc4c	CV
chr2	98503766	98504360	intergenic	Lrrc4c	CV
chr2	98506326	98507526	intergenic	Lrrc4c	CV
chr2	100325398	100325648	intergenic	B230118H07Rik	CV
chr2	100359795	100360216	intergenic	B230118H07Rik	CV
chr2	100425339	100425751	intergenic	B230118H07Rik	CV
chr2	100492128	100492578	intergenic	B230118H07Rik	CV
chr2	109832122	109832372	intronic	Lgr4	CV
chr2	115275470	115275720	intergenic	3110099E03Rik	CV
chr2	133564457	133564894	intergenic	Bmp2	CV
chr2	150046969	150047219	intronic	Zfp937	CV
chr2	150750670	150750920	intronic	Gins1	CV
chr2	150855975	150856396	exonic	Nanp	CV
chr2	152013243	152013493	intergenic	Tcf15	CV
chr2	155175981	155176288	intronic	Pigu	CV
chr2	163239110	163239360	intronic	3230401D17Rik	CV
chr2	168804406	168804788	intergenic	AK006070	CV
chr3	3618480	3618730	intronic	Hnf4g	CV
chr3	3643718	3643968	intronic	Hnf4g	CV
chr3	8006337	8006587	intergenic	AK005828	CV
chr3	14408656	14408906	intergenic	Gm6300	CV
chr3	15513845	15514095	intronic	LOC100038947	CV
chr3	33698103	33698353	promoter	Ttc14	CV
chr3	35791905	35792155	exonic	Dcun1d1	CV
chr3	41547595	41547845	promoter	D3Ertd751e	CV
chr3	44110280	44110604	intergenic	AK012035	CV
chr3	53974593	53974843	intronic	Trpc4	CV
chr3	55788035	55788285	intronic	Nbea	CV
chr3	55850174	55850424	intronic	Nbea	CV
chr3	55890589	55890839	intronic	Nbea	CV
chr3	56379110	56379360	intergenic	Nbea	CV
chr3	56379496	56379746	intergenic	Nbea	CV
chr3	57165067	57165361	intergenic	Tm4sf1	CV
chr3	59617488	59617738	intronic	4930449A18Rik	CV
chr3	60128912	60129299	intergenic	Mbnl1	CV
chr3	62296799	62297049	intronic	Dhx36	CV
chr3	63102038	63102288	promoter	Mme	CV
chr3	66948793	66949043	intronic	Rsrc1	CV
chr3	67858688	67858938	intronic	Iqcj-schip1	CV
chr3	71078535	71078785	intergenic	AK144724	CV
chr3	72770550	72770800	promoter	Sis	CV
chr3	72803145	72803395	intergenic	Sis	CV
chr3	72806903	72807153	intergenic	Sis	CV
chr3	73497539	73497937	intronic	Bche	CV
chr3	73521747	73521997	intergenic	Bche	CV
chr3	86346158	86346408	intronic	Lrba	CV
chr3	103885884	103886134	intronic	Magi3	CV
chr3	109598955	109599253	intronic	Ntng1	CV
chr3	110263141	110263534	intergenic	Prmt6	CV
chr3	112894262	112894512	intergenic	Amy2b	CV
chr3	115226135	115226727	intergenic	S1pr1	CV
chr3	115232836	115233486	intergenic	S1pr1	CV
chr3	115250623	115250873	intergenic	S1pr1	CV
chr3	117427396	117427646	intergenic	4833424O15Rik	CV
chr3	117428323	117428714	intergenic	4833424O15Rik	CV
chr3	120568630	120568880	intronic	AK163681	CV
chr3	122247112	122247362	intronic	Fnbp1l	CV
chr3	129668412	129668749	intronic	Ccdc109b	CV
chr3	132415549	132415799	exonic	Tbck	CV
chr3	133773704	133773954	intronic	AK034519	CV
chr3	136448922	136449172	intronic	Ppp3ca	CV
chr3	142504700	142504950	intronic	Pkn2	CV
chr3	143325948	143326198	intergenic	AK043613	CV
chr3	154743316	154743566	intergenic	Fpgt	CV
chr3	155119238	155119488	intergenic	Lrriq3	CV
chr3	156940906	156941156	intronic	Negr1	CV
chr3	156969770	156970020	intronic	Negr1	CV
chr3	156996288	156996723	intergenic	Negr1	CV
chr3	156998984	156999234	intergenic	Negr1	CV
chr3	157116117	157116367	intergenic	AK076987	CV
chr3	157303807	157304057	intronic	Ptger3	CV
chr3	157693433	157693683	intronic	Srsf11	CV
chr3	159505079	159505329	intronic	Wls	CV
chr3	159505479	159505729	intronic	Wls	CV
chr4	9707620	9707870	intronic	4930412C18Rik	CV
chr4	19297090	19297379	intronic	Cngb3	CV
chr4	29080508	29080758	intergenic	Epha7	CV
chr4	35898484	35898734	intronic	Lingo2	CV
chr4	35939405	35939655	intronic	Lingo2	CV
chr4	35940205	35940455	intronic	Lingo2	CV
chr4	36042633	36042883	intronic	Lingo2	CV
chr4	36488263	36488513	intronic	Lingo2	CV
chr4	52190110	52190360	intergenic	AK012547	CV
chr4	52512509	52512929	intergenic	Smc2	CV
chr4	53726607	53726857	promoter	Fktn	CV
chr4	71017153	71017403	intergenic	AK083054	CV
chr4	71387261	71387511	intergenic	AK083054	CV
chr4	79649575	79649825	intergenic	Tyrp1	CV
chr4	82449942	82450308	exonic	Zdhhc21	CV
chr4	83855138	83855388	intergenic	Bnc2	CV
chr4	91058200	91058503	intronic	Elavl2	CV
chr4	94317364	94317783	promoter	Lrrc19	CV
chr4	95940956	95941206	intergenic	Cyp2j11-ps	CV
chr4	109338012	109338262	promoter	Cdkn2c	CV
chr4	111424195	111424445	intronic	Spata6	CV
chr4	114937436	114937686	intergenic	Cyp4a29-ps	CV
chr4	143889353	143889737	intergenic	Pramel4	CV
chr5	9495883	9496133	intronic	Grm3	CV
chr5	15201210	15201512	intronic	Speer7-ps1	CV
chr5	15239999	15240249	intergenic	Speer7-ps1	CV
chr5	15815305	15815555	intronic	Cacna2d1	CV
chr5	17995365	17995615	exonic	AK076902	CV
chr5	24930069	24930319	intronic	Mll3	CV
chr5	33073302	33073552	intergenic	Pisd	CV
chr5	44166692	44167196	intronic	Fbxl5	CV
chr5	46423707	46423957	intergenic	Lcorl	CV
chr5	48088063	48088313	intergenic	Slit2	CV
chr5	49070729	49070979	intronic	Kcnip4	CV
chr5	51306646	51306896	intergenic	AK030154	CV
chr5	60183275	60183601	intergenic	BC099582	CV
chr5	81746711	81746961	intronic	Lphn3	CV
chr5	82340016	82340266	intergenic	AK046304	CV
chr5	83864471	83864738	intergenic	Tecrl	CV
chr5	88002879	88003129	intergenic	Sult1e1	CV
chr5	88416523	88416773	intergenic	4931407G18Rik	CV
chr5	92390670	92390920	promoter	Thap6	CV
chr5	98620956	98621206	intergenic	Prdm8	CV
chr5	98978668	98978918	intronic	1700007G11Rik	CV
chr5	99057917	99058167	intronic	1700007G11Rik	CV
chr5	99757758	99758008	intronic	A930011G23Rik	CV
chr5	103511587	103511837	intronic	Mapk8	CV
chr5	103519660	103519910	intronic	Mapk8	CV
chr5	131395650	131396023	intronic	Wbscr17	CV
chr6	3809969	3810219	intergenic	Calcr	CV
chr6	3867256	3867506	intergenic	Tfpi2	CV
chr6	8460931	8461181	promoter	AK037260	CV
chr6	12075690	12075940	intergenic	Gm6578	CV
chr6	12737247	12737497	intergenic	Thsd7a	CV
chr6	18040121	18040371	intronic	Asz1	CV
chr6	18130962	18131212	intronic	Cftr	CV
chr6	18198316	18198566	intronic	Cftr	CV
chr6	24219491	24219741	intergenic	Slc13a1	CV
chr6	45091243	45091493	intronic	Cntnap2	CV
chr6	49186310	49186560	intergenic	Tra2a	CV
chr6	60632177	60632427	intergenic	Snca	CV
chr6	65620808	65621058	promoter	A930038C07Rik	CV
chr6	68826882	68827209	intronic	abParts	CV
chr6	70645303	70645553	intronic	abParts	CV
chr6	76937341	76937591	intronic	Ctnna2	CV
chr6	77070682	77070932	intronic	Ctnna2	CV
chr6	96103920	96104228	intronic	Fam19a1	CV
chr6	106722778	106723028	intronic	Trnt1	CV
chr6	116864371	116864621	intergenic	Tmem72	CV
chr6	128819985	128820235	intronic	BC035044	CV
chr6	133656671	133657084	intergenic	Mir1937b-2	CV
chr6	139134441	139134691	intergenic	AK132719	CV
chr6	139535808	139536058	intronic	Pik3c2g	CV
chr7	20652625	20652875	intronic	Nlrp9b	CV
chr7	59031708	59031958	intergenic	AK195420	CV
chr7	59265722	59265972	intergenic	1700015G11Rik	CV
chr7	59511721	59511971	intergenic	1700015G11Rik	CV
chr7	59512121	59512371	intergenic	1700015G11Rik	CV
chr7	68360394	68360732	intronic	DOKist4	CV
chr7	75778781	75779031	intergenic	Gm5334	CV
chr7	76637268	76637518	intergenic	DQ696815	CV
chr7	96869724	96869974	intronic	Me3	CV
chr7	104233864	104234114	intronic	Gab2	CV
chr7	111730207	111730457	intergenic	Olfr653	CV
chr7	115814617	115814867	intergenic	Olfr510	CV
chr7	115815013	115815461	intergenic	Olfr510	CV
chr7	115940768	115941018	intergenic	Olfr514	CV
chr7	117583082	117583332	intronic	Sbf2	CV
chr7	136736191	136736441	intronic	Wdr11	CV
chr7	138597353	138597603	intergenic	Acadsb	CV
chr7	138889019	138889269	intergenic	AB033524	CV
chr8	4656637	4656887	intergenic	Zfp958	CV
chr8	5104911	5105161	exonic	Slc10a2	CV
chr8	5428842	5429092	intergenic	Slc10a2	CV
chr8	6073770	6074020	intergenic	Slc10a2	CV
chr8	6188297	6188547	intergenic	Slc10a2	CV
chr8	6689445	6689695	intergenic	AK082314	CV
chr8	9963620	9963956	intergenic	Lig4	CV
chr8	18991223	18991473	promoter	Defb37	CV
chr8	19691477	19691727	exonic	AK134636	CV
chr8	19699019	19699269	intergenic	AK134636	CV
chr8	19704382	19704632	intergenic	AK134636	CV
chr8	19801236	19801486	intergenic	5330429B09Rik	CV
chr8	19884816	19885066	intronic	6820431F20Rik	CV
chr8	19885194	19885633	intronic	6820431F20Rik	CV
chr8	20012587	20012837	intronic	6820431F20Rik	CV
chr8	24205798	24206248	intronic	Ank1	CV
chr8	27034365	27034615	intronic	Kcnu1	CV
chr8	39058537	39058787	intronic	Sgcz	CV
chr8	43272428	43272678	intergenic	Zfp353	CV
chr8	44136312	44136598	intergenic	Triml1	CV
chr8	47090864	47091114	intronic	Lrp2bp	CV
chr8	51379102	51379352	intergenic	AK006131	CV
chr8	54725059	54725309	promoter	Neil3	CV
chr8	64481039	64481289	intronic	Ddx60	CV
chr8	75843334	75843584	intronic	Large	CV
chr8	78897884	78898134	intergenic	Gm10649	CV
chr8	79007271	79007521	intergenic	Gm10649	CV
chr8	79143268	79143518	intergenic	Gm10649	CV
chr8	79270197	79270447	intergenic	Gm10649	CV
chr8	91239456	91239706	intronic	Cyld	CV
chr8	92464072	92464346	intergenic	Tox3	CV
chr8	99392709	99392959	intergenic	AK006709	CV
chr8	108581157	108581469	promoter	Nfatc3	CV
chr8	113770660	113770910	intronic	Glg1	CV
chr9	3004014	3004264	intergenic	DQ702609	CV
chr9	3006414	3006664	intergenic	DQ702609	CV
chr9	3013178	3013428	intergenic	DQ702609	CV
chr9	3015085	3015335	intergenic	DQ702609	CV
chr9	3016285	3016535	intergenic	DQ702609	CV
chr9	3018734	3019184	intergenic	DQ702609	CV
chr9	3024687	3024937	intergenic	DQ702609	CV
chr9	3025287	3025737	intergenic	DQ702609	CV
chr9	3028287	3028537	intergenic	DQ702609	CV
chr9	3031687	3032137	intergenic	DQ702609	CV
chr9	3032287	3032537	intergenic	DQ702609	CV
chr9	3034227	3034477	intergenic	DQ702609	CV
chr9	3036507	3036757	intergenic	DQ702609	CV
chr9	5833567	5833817	intergenic	Pdgfd	CV
chr9	11373485	11373735	intergenic	Cntn5	CV
chr9	11405282	11405532	intergenic	Cntn5	CV
chr9	15362818	15363068	intergenic	Ccdc67	CV
chr9	17479753	17480003	intergenic	Chordc1	CV
chr9	17480501	17480751	intergenic	Chordc1	CV
chr9	19715726	19716025	intergenic	Olfr77	CV
chr9	35112559	35113409	intergenic	Rpusd4	CV
chr9	35232501	35232751	intronic	Cdon	CV
chr9	44687569	44687819	intronic	Mll1	CV
chr9	52956634	52956884	intronic	Ddx10	CV
chr9	58841334	58841717	intronic	Neo1	CV
chr9	71359468	71359718	intronic	Gcom1	CV
chr9	71788288	71788538	intronic	Tcf12	CV
chr9	71790157	71790407	intronic	Tcf12	CV
chr9	75016057	75016378	intronic	Myo5a	CV
chr9	80574904	80575154	intergenic	Impg1	CV
chr9	85303561	85303811	intergenic	Fam46a	CV
chr9	92148363	92148670	intronic	Plscr1	CV
chr9	92666448	92666698	intergenic	Plod2	CV
chr9	92764911	92765161	intergenic	AK018841	CV
chr9	94828401	94828651	intronic	Slc9a9	CV
chr9	100684942	100685372	intronic	Stag1	CV
chr9	100751397	100751647	intronic	Stag1	CV
chr9	118058199	118058449	promoter	AK039053	CV
chrX	5625482	5625732	exonic	Nudt11	CV
chrX	9486965	9487215	intronic	Sytl5	CV
chrX	16139676	16139926	intergenic	Cypt8	CV
chrX	17832058	17832308	intronic	Kdm6a	CV
chrX	39899645	39899895	intronic	Odz1	CV
chrX	41093861	41094111	intergenic	Gm362	CV
chrX	51101015	51101265	promoter	Xlr	CV
chrX	54017057	54017307	intronic	Fhl1	CV
chrX	65939549	65939943	intronic	Fmr1	CV
chrX	70904429	70904793	intronic	Pnck	CV
chrX	72906302	72906552	intergenic	4933407K13Rik	CV
chrX	72909128	72909378	intergenic	4933407K13Rik	CV
chrX	72911796	72912046	intergenic	4933407K13Rik	CV
chrX	72912950	72913387	intergenic	4933407K13Rik	CV
chrX	72917086	72917336	intergenic	4933407K13Rik	CV
chrX	92043625	92044075	promoter	Zxda	CV
chrX	103061663	103061913	intronic	Atrx	CV
chrX	106706951	106707201	intergenic	Gm6377	CV
chrX	109608703	109608953	promoter	2010106E10Rik	CV
chrX	120775080	120775330	intergenic	Vmn2r89	CV
chrX	126424243	126424493	intronic	Diap2	CV
chrX	140256292	140256571	intronic	Capn6	CV
chrX	140564580	140564831	intergenic	AK042998	CV
chrX	157547636	157547886	intergenic	Scml2	CV
chr1	34047733	34047983	intronic	Dst	CR
chr10	76949697	76949947	exonic	1810008A18Rik	CR
chr10	79269769	79270019	exonic	Palm	CR
chr10	79360149	79360399	exonic	Med16	CR
chr10	79490725	79490975	intronic	Hmha1	CR
chr10	79538171	79538421	promoter	Sbno2	CR
chr10	79593194	79593444	exonic	Dos	CR
chr10	79599115	79599365	promoter	Dos	CR
chr10	79599515	79599765	promoter	Dos	CR
chr10	79613457	79613707	intronic	Midn	CR
chr10	79767848	79768098	exonic	Apc2	CR
chr10	79882255	79882505	exonic	Tcf3	CR
chr10	80092946	80093196	intronic	Csnk1g2	CR
chr10	80118395	80118845	intronic	Btbd2	CR
chr10	80237529	80237779	intronic	Dot1l	CR
chr10	80588526	80588776	intergenic	Map2k2	CR
chr10	80767622	80767872	intronic	Pip5k1c	CR
chr10	80768406	80768656	exonic	Pip5k1c	CR
chr10	80773513	80773763	exonic	Pip5k1c	CR
chr10	80779713	80779963	intronic	Pip5k1c	CR
chr10	80839265	80839515	intronic	Fzr1	CR
chr10	80879671	80880121	intronic	Nfic	CR
chr11	69715453	69715703	promoter	2810408A11Rik	CR
chr11	78335787	78336037	exonic	Poldip2	CR
chr11	96858400	96858650	intergenic	Sp6	CR
chr11	97426992	97427242	intronic	Srcin1	CR
chr11	98245178	98245428	exonic	Tcap	CR
chr11	99011754	99012004	intronic	Ccr7	CR
chr11	103231430	103231680	intronic	Plekhm1	CR
chr11	115721099	115721349	intergenic	Llgl2	CR
chr11	119926810	119927060	exonic	Azi1	CR
chr11	120140352	120140602	exonic	Bahcc1	CR
chr11	120141552	120141802	intronic	Bahcc1	CR
chr15	75935359	75935609	exonic	Eppk1	CR
chr15	78741437	78741687	intronic	Sh3bp1	CR
chr15	78826468	78826718	intronic	Triobp	CR
chr15	79128106	79128356	intronic	Pla2g6	CR
chr15	83611104	83611354	intronic	Mpped1	CR
chr17	24643371	24643621	exonic	Caskin1	CR
chr17	24743125	24743375	exonic	Tsc2	CR
chr17	34069811	34070061	exonic	Rgl2	CR
chr17	35161000	35161250	exonic	D17H6S56E-3	CR
chr17	57171836	57172086	promoter	Khsrp	CR
chr19	7221041	7221291	intronic	Macrod1	CR
chr19	38457229	38457479	intergenic	Tmem20	CR
chr2	29709501	29709751	intergenic	Mir219-2	CR
chr2	30295106	30295356	exonic	Ppp2r4	CR
chr2	167644354	167644604	intergenic	Ptpn1	CR
chr3	94761284	94761534	intronic	Rfx5	CR
chr5	114622966	114623216	intronic	Acacb	CR
chr5	131995443	131995693	intronic	Auts2	CR
chr5	140231575	140231825	promoter	Ints1	CR
chr5	150059489	150059739	intergenic	AK009869	CR
chr6	111514240	111514598	intronic	Grm7	CR
chr6	124683094	124683344	promoter	Ptpn6	CR
chr6	131327402	131327652	intronic	Csda	CR
chr7	87697661	87698107	intergenic	Blm	CR
chr7	135030251	135030501	exonic	Prss53	CR
chr7	149156454	149156704	intronic	Brsk2	CR
chr8	70039363	70039613	intergenic	Nat3	CR
chr8	73118349	73118599	promoter	Isyna1	CR
chr8	73206634	73206884	intergenic	Lsm4	CR
chr8	73208186	73208436	intergenic	Lsm4	CR
chr8	73242232	73242482	promoter	Gm3336	CR
chr8	73345548	73345798	intergenic	Il12rb1	CR
chr8	122202473	122202723	intronic	Wfdc1	CR
chr8	123032970	123033420	intronic	Gse1	CR
chr8	123042402	123042652	intronic	Gse1	CR
chr8	123056450	123056700	intronic	Gse1	CR
chr8	123088662	123088912	promoter	Gse1	CR
chr8	125172648	125172898	intronic	Cbfa2t3	CR
chr8	125183181	125183431	intronic	Cbfa2t3	CR
chr8	125253750	125254000	intronic	AK032654	CR
chr9	102674560	102674810	intergenic	EG434510	CR
chrX	126291447	126291835	intronic	Diap2	CR

## Sheet: CRvs.GF_ileum_FDR<0.0001
Table S7: DHS putatively differential in the presence and absence of microbiota at FDR < 0.0001
chrom	start	stop	genic feature	nearest gene	Direction
chr3	115226477	115226727	intergenic	S1pr1	GF

## Sheet: CRvs.GF_ileum_FDR<0.05
Table S7: DHS putatively differential in the presence and absence of microbiota at FDR < 0.05
chrom	start	stop	genic feature	nearest gene	Direction
chr3	115226477	115226727	intergenic	S1pr1	GF
chr3	115233036	115233286	intergenic	S1pr1	GF
chr3	156940906	156941156	intronic	Negr1	GF
chr9	75016057	75016307	intronic	Myo5a	GF
chr11	99307861	99308111	intergenic	Krt20	CR
chr12	111301245	111301495	intronic	Ppp2r5c	CR
chr2	74017078	74017328	intergenic	AK041976	CR
chr2	103253535	103253785	intronic	Elf5	CR
chr6	61015846	61016096	intergenic	Mmrn1	CR

## Sheet: CVvs.GF_ileum_FDR<0.0001
Table S7: DHS putatively differential in the presence and absence of microbiota at FDR < 0.0001
chrom	start	stop	genic feature	nearest gene	Direction
chr12	32397633	32397992	intronic	Gpr22	CV
chr15	13804546	13804839	intergenic	Cdh6	CV
chr2	39064716	39065102	intronic	Ppp6c	CV
chr3	129668412	129668749	intronic	Ccdc109b	CV
chr5	9495883	9496133	intronic	Grm3	CV
chr5	63209696	63209991	intronic	Dthd1	CV
chr5	131395773	131396023	intronic	Wbscr17	CV
chr8	9963620	9963956	intergenic	Lig4	CV
chr9	3004014	3004264	intergenic	DQ702609	CV
chr9	80574904	80575154	intergenic	Impg1	CV
chrX	70904429	70904679	intronic	Pnck	CV
chrX	72911414	72911664	intergenic	4933407K13Rik	CV
chrX	92043625	92044075	promoter	Zxda	CV

## Sheet: CVvs.GF_ileum_FDR<0.05
Table S7: DHS putatively differential in the presence and absence of microbiota at FDR < 0.05
chrom	start	stop	genic feature	nearest gene	Direction
chr1	88401133	88401383	intergenic	Ptma	GF
chr1	138066932	138067182	intronic	Kif21b	GF
chr10	79269769	79270019	exonic	Palm	GF
chr10	79599115	79599365	promoter	Dos	GF
chr10	79599515	79599765	promoter	Dos	GF
chr10	80011765	80012015	promoter	Rexo1	GF
chr10	80092946	80093196	intronic	Csnk1g2	GF
chr10	80118395	80118845	intronic	Btbd2	GF
chr10	80237329	80237779	intronic	Dot1l	GF
chr10	80767622	80767872	intronic	Pip5k1c	GF
chr10	80839265	80839515	intronic	Fzr1	GF
chr10	80871147	80871397	exonic	Nfic	GF
chr10	81038217	81038467	promoter	Tle2	GF
chr11	60010160	60010410	intronic	Rai1	GF
chr11	75026093	75026343	intronic	Rtn4rl1	GF
chr11	97426992	97427242	intronic	Srcin1	GF
chr11	102079487	102079737	exonic	Hdac5	GF
chr11	103231430	103231680	intronic	Plekhm1	GF
chr11	119836855	119837105	intronic	Baiap2	GF
chr11	119926810	119927060	exonic	Azi1	GF
chr11	120128762	120129012	intronic	Bahcc1	GF
chr11	120140352	120140602	exonic	Bahcc1	GF
chr11	120623232	120623482	promoter	AK195902	GF
chr12	114151165	114151415	exonic	Jag2	GF
chr12	114196687	114196937	intergenic	Brf1	GF
chr14	26242834	26243084	intronic	AK086741	GF
chr15	83611104	83611354	intronic	Mpped1	GF
chr17	24643371	24643621	exonic	Caskin1	GF
chr17	24645171	24645421	exonic	Caskin1	GF
chr17	24743125	24743375	exonic	Tsc2	GF
chr17	31555647	31555897	intronic	Pde9a	GF
chr17	32045756	32046006	intergenic	Hsf2bp	GF
chr17	34195950	34196200	exonic	Col11a2	GF
chr17	34197750	34198000	exonic	Col11a2	GF
chr17	35161000	35161250	exonic	D17H6S56E-3	GF
chr17	56249272	56249522	promoter	Plin4	GF
chr17	57171836	57172086	promoter	Khsrp	GF
chr19	7221041	7221291	intronic	Macrod1	GF
chr2	29709501	29709751	intergenic	Mir219-2	GF
chr2	30295106	30295356	exonic	Ppp2r4	GF
chr2	167811682	167811932	intronic	Fam65c	GF
chr3	87586754	87587004	exonic	Ntrk1	GF
chr4	129760863	129761113	exonic	Col16a1	GF
chr4	134435674	134435924	promoter	Rhd	GF
chr4	136822318	136822568	intergenic	Wnt4	GF
chr4	140561629	140561879	intronic	Atp13a2	GF
chr4	151756227	151756477	exonic	Chd5	GF
chr5	113609665	113609915	intergenic	2900026A02Rik	GF
chr5	114874711	114874961	intergenic	Ube3b	GF
chr5	140230775	140231025	promoter	Ints1	GF
chr5	140231575	140231825	promoter	Ints1	GF
chr5	140250833	140251278	intronic	Ints1	GF
chr6	48414771	48415021	promoter	Sspo	GF
chr7	29673344	29673594	exonic	Capn12	GF
chr7	52940982	52941232	intronic	Ntn5	GF
chr7	53040743	53040993	promoter	Lmtk3	GF
chr7	87697857	87698107	intergenic	Blm	GF
chr7	149742315	149742565	intronic	Nctc1	GF
chr8	72940729	72940979	intronic	Crtc1	GF
chr8	73242232	73242482	promoter	Gm3336	GF
chr8	73345548	73345798	intergenic	Il12rb1	GF
chr8	123088662	123088912	promoter	Gse1	GF
chr8	125172648	125172898	intronic	Cbfa2t3	GF
chr8	125183575	125183825	intronic	Cbfa2t3	GF
chr9	37226143	37226393	exonic	Robo3	GF
chr9	108870226	108870476	promoter	Col7a1	GF
chr1	7167641	7167934	intergenic	Pcmtd1	CV
chr1	7387919	7388169	promoter	AK043789	CV
chr1	7492539	7492789	intergenic	AK043789	CV
chr1	8321388	8321671	intergenic	Sntg1	CV
chr1	8440225	8440475	intronic	Sntg1	CV
chr1	9004560	9004810	intronic	Sntg1	CV
chr1	9139229	9139479	intronic	Sntg1	CV
chr1	9143815	9144065	intronic	Sntg1	CV
chr1	10189957	10190207	exonic	Arfgef1	CV
chr1	15572388	15572638	intronic	Kcnb2	CV
chr1	24114658	24114908	intergenic	Fam135a	CV
chr1	24621468	24621718	promoter	Atpase6	CV
chr1	24622068	24622318	promoter	Atpase6	CV
chr1	27101558	27101808	intergenic	4931408C20Rik	CV
chr1	43998450	43998700	intronic	Tpp2	CV
chr1	46109872	46110122	intergenic	Dnahc7b	CV
chr1	46474413	46474663	intergenic	AK219219	CV
chr1	46906898	46907148	intronic	Slc39a10	CV
chr1	47620757	47621007	intergenic	AK219219	CV
chr1	52288697	52288947	intronic	Gls	CV
chr1	53686834	53687262	intergenic	Mir1937b-2	CV
chr1	56019967	56020217	intronic	AK079812	CV
chr1	56240752	56241002	intergenic	AK005643	CV
chr1	56313939	56314189	intergenic	AK005643	CV
chr1	56597222	56597472	intergenic	Hsfy2	CV
chr1	56669485	56669735	intergenic	Hsfy2	CV
chr1	56679984	56680634	intergenic	Hsfy2	CV
chr1	56838713	56838963	intergenic	Satb2	CV
chr1	60243590	60243840	intronic	Nbeal1	CV
chr1	60629909	60630159	intergenic	Raph1	CV
chr1	60890219	60890469	intergenic	AK009383	CV
chr1	60911324	60911574	intergenic	AK009383	CV
chr1	61784302	61784552	intronic	Pard3b	CV
chr1	65467480	65467730	intergenic	Pth2r	CV
chr1	66159498	66159748	intergenic	Mtap2	CV
chr1	67159948	67160398	intergenic	Cps1	CV
chr1	67162711	67162961	intergenic	Cps1	CV
chr1	67164244	67164820	intergenic	Cps1	CV
chr1	67165421	67165671	intergenic	Cps1	CV
chr1	68589593	68589843	intronic	Erbb4	CV
chr1	73377598	73377866	intergenic	Pinc	CV
chr1	82698442	82698692	intronic	AK043693	CV
chr1	83104140	83104390	intergenic	Ccl20	CV
chr1	84730684	84730934	intronic	Trip12	CV
chr1	84844124	84844374	intronic	Fbxo36	CV
chr1	96962239	96962489	intergenic	Fam174a	CV
chr1	99460535	99460785	intergenic	D1Ertd622e	CV
chr1	99470030	99470280	intergenic	D1Ertd622e	CV
chr1	99473621	99474064	intergenic	D1Ertd622e	CV
chr1	105385715	105386162	intergenic	Cdh20	CV
chr1	107444986	107445236	intronic	Pign	CV
chr1	109480069	109480376	intergenic	Serpinb8	CV
chr1	109593269	109593519	intergenic	Serpinb8	CV
chr1	116049359	116049609	intergenic	AK043174	CV
chr1	131812003	131812389	promoter	Thsd7b	CV
chr1	131814032	131814282	intronic	Thsd7b	CV
chr1	138272762	138273048	intergenic	Camsap1l1	CV
chr1	140938056	140938306	intronic	Dennd1b	CV
chr1	142312521	142312771	intronic	Kcnt2	CV
chr1	145650723	145651125	intronic	Uchl5	CV
chr1	153606530	153606938	intronic	Edem3	CV
chr1	157891155	157891405	intronic	Tor1aip2	CV
chr1	159253264	159253514	intronic	Rasal2	CV
chr1	159271525	159271975	intronic	Rasal2	CV
chr1	161180500	161181311	intronic	Rfwd2	CV
chr1	161184812	161185062	intronic	Rfwd2	CV
chr1	161186615	161186865	intronic	Rfwd2	CV
chr1	162515605	162515855	intronic	Rabgap1l	CV
chr1	162516780	162517186	intronic	Rabgap1l	CV
chr1	162538969	162539219	intronic	Rabgap1l	CV
chr1	162614585	162614835	intronic	Rabgap1l	CV
chr1	162615534	162615784	intronic	Rabgap1l	CV
chr1	162618761	162619011	intronic	Rabgap1l	CV
chr1	165336479	165336729	intergenic	Gorab	CV
chr1	167284398	167284648	intronic	Dcaf6	CV
chr1	167285122	167285550	intronic	Dcaf6	CV
chr1	167926490	167926740	intronic	Pou2f1	CV
chr1	167929696	167930100	intronic	Pou2f1	CV
chr1	170828328	170828578	intergenic	Pbx1	CV
chr1	172817209	172817459	promoter	Dusp12	CV
chr1	175886277	175886527	intergenic	Ifi202b	CV
chr1	176233326	176233576	intergenic	1810030J14Rik	CV
chr1	182058095	182058530	intronic	Cdc42bpa	CV
chr1	189041471	189041721	intronic	Gpatch2	CV
chr1	189064217	189064467	intronic	Gpatch2	CV
chr1	189821679	189821929	promoter	Esrrg	CV
chr10	4055960	4056210	intergenic	Rgs17	CV
chr10	5065646	5065896	intergenic	Syne1	CV
chr10	7660705	7660955	intronic	Tab2	CV
chr10	9514141	9514391	intronic	Stxbp5	CV
chr10	11211966	11212216	intergenic	Epm2a	CV
chr10	14181813	14182063	intronic	Gpr126	CV
chr10	16291847	16292097	intergenic	AK029503	CV
chr10	16309270	16309647	intergenic	AK029503	CV
chr10	16320625	16320875	intergenic	AK029503	CV
chr10	16698659	16698909	intronic	AK029503	CV
chr10	16714457	16714707	intronic	AK029503	CV
chr10	16793006	16793439	intronic	AK029503	CV
chr10	20548373	20548623	intergenic	Pde7b	CV
chr10	26093040	26093290	intronic	L3mbtl3	CV
chr10	28076719	28076969	intronic	Ptprk	CV
chr10	28107563	28107813	intronic	Ptprk	CV
chr10	33660560	33660968	intronic	Zufsp	CV
chr10	34001268	34001518	promoter	Tspyl1	CV
chr10	34001668	34001918	promoter	Tspyl1	CV
chr10	34227703	34227953	intronic	Frk	CV
chr10	34228451	34228851	intronic	Frk	CV
chr10	34262130	34262380	intronic	Frk	CV
chr10	37859550	37859800	intergenic	AK016383	CV
chr10	47501078	47501389	intergenic	Grik2	CV
chr10	51669176	51669451	intergenic	Vgll2	CV
chr10	54934820	54935137	intergenic	D630037F22Rik	CV
chr10	57250372	57250745	intronic	Serinc1	CV
chr10	57258603	57258853	intergenic	Serinc1	CV
chr10	57515723	57515973	intronic	Smpdl3a	CV
chr10	66639281	66639531	intronic	Jmjd1c	CV
chr10	67588754	67589004	intronic	Arid5b	CV
chr10	67740643	67740893	exonic	Arid5b	CV
chr10	75600692	75600942	intergenic	Slc5a4a	CV
chr10	84488558	84488808	intergenic	Ric8b	CV
chr10	86168200	86168450	promoter	Hsp90b1	CV
chr10	95540445	95540695	intergenic	Eea1	CV
chr10	96683046	96683296	intergenic	Dcn	CV
chr10	97478068	97478318	intergenic	Gm10754	CV
chr10	98130323	98130573	intergenic	Atp2b1	CV
chr10	98139734	98139984	intergenic	Atp2b1	CV
chr10	98140968	98141218	intergenic	Atp2b1	CV
chr10	98146919	98147169	intergenic	Atp2b1	CV
chr10	98149043	98149293	intergenic	Atp2b1	CV
chr10	99362383	99362633	intergenic	Kitl	CV
chr10	99518464	99518714	intronic	Kitl	CV
chr10	101777012	101777262	intronic	Mgat4c	CV
chr10	101834074	101834324	intronic	Mgat4c	CV
chr10	101836675	101837125	promoter	Mgat4c	CV
chr10	101838415	101838665	intronic	Mgat4c	CV
chr10	101845895	101846268	intronic	Mgat4c	CV
chr10	102079000	102079250	intergenic	Rassf9	CV
chr10	102099215	102099465	intergenic	Rassf9	CV
chr10	103889041	103889291	intergenic	Gm4340	CV
chr10	106788432	106788882	intronic	Lin7a	CV
chr10	106790617	106790867	intronic	Lin7a	CV
chr10	107184187	107184437	intergenic	Gm6924	CV
chr10	112319370	112319620	intergenic	AK036450	CV
chr10	112457827	112458077	intergenic	Atxn7l3b	CV
chr10	115258015	115258265	intronic	Tspan8	CV
chr10	122485771	122486021	intronic	Mon2	CV
chr10	125804769	125805056	intergenic	AK005576	CV
chr11	3000250	3000700	intergenic	Pisd-ps1	CV
chr11	3000850	3001100	intergenic	Pisd-ps1	CV
chr11	3001650	3002500	intergenic	Pisd-ps1	CV
chr11	3002650	3002900	intergenic	Pisd-ps1	CV
chr11	3003250	3004100	intergenic	Pisd-ps1	CV
chr11	3004250	3004900	intergenic	Pisd-ps1	CV
chr11	3023742	3024592	promoter	Pisd-ps1	CV
chr11	3025165	3025415	promoter	Pisd-ps1	CV
chr11	3026365	3026815	intronic	Pisd-ps1	CV
chr11	17722352	17722602	intergenic	Etaa1	CV
chr11	21000615	21000865	intronic	Peli1	CV
chr11	21016447	21016697	intronic	Peli1	CV
chr11	21190788	21191038	exonic	Vps54	CV
chr11	22072970	22073220	promoter	Ehbp1	CV
chr11	25057275	25057622	intergenic	AK016948	CV
chr11	29618717	29618967	exonic	Rtn4	CV
chr11	30992952	30993202	intronic	Asb3	CV
chr11	31806454	31806867	intronic	Cpeb4	CV
chr11	34444443	34444693	intronic	Dock2	CV
chr11	39594207	39594457	intergenic	AK016100	CV
chr11	39715322	39715572	intergenic	AK016100	CV
chr11	39777300	39777550	intergenic	AK016100	CV
chr11	40265281	40265701	intergenic	Mat2b	CV
chr11	54252804	54253054	intronic	Fnip1	CV
chr11	62353272	62353583	promoter	Cenpv	CV
chr11	62868255	62868505	intergenic	Tekt3	CV
chr11	73138039	73138289	promoter	Aspa	CV
chr11	77002336	77002586	promoter	Efcab5	CV
chr11	77009241	77009491	intergenic	Efcab5	CV
chr11	77009641	77009891	intergenic	Efcab5	CV
chr11	80437955	80438381	intronic	Myo1d	CV
chr11	84069360	84069797	intronic	Acaca	CV
chr11	86562842	86563092	intronic	Cltc	CV
chr11	88584380	88584695	intronic	AK214167	CV
chr11	99476740	99476990	promoter	Gm11562	CV
chr11	101507062	101507312	intergenic	Rdm1	CV
chr11	105158655	105158905	intronic	Mrc2	CV
chr11	105443338	105443588	intergenic	Tanc2	CV
chr11	105487494	105487744	intronic	Tanc2	CV
chr11	107060194	107060981	intergenic	Pitpnc1	CV
chr11	108021246	108021538	intronic	Prkca	CV
chr11	108478556	108478806	intronic	Ccdc46	CV
chr11	108527866	108528284	intronic	Ccdc46	CV
chr11	109920241	109920491	intronic	Abca8a	CV
chr11	111549135	111549385	intergenic	Kcnj2	CV
chr11	112192409	112192841	intergenic	BC006965	CV
chr11	112207351	112207601	intergenic	BC006965	CV
chr11	112410556	112410806	intergenic	BC006965	CV
chr12	3109930	3110180	intergenic	1700012B15Rik	CV
chr12	4913374	4913624	intronic	Ubxn2a	CV
chr12	13199761	13200011	intergenic	Ddx1	CV
chr12	13277346	13277596	intronic	Nbas	CV
chr12	14308342	14308592	intergenic	AY512908	CV
chr12	24654069	24654319	intergenic	Gm4983	CV
chr12	31760010	31760260	exonic	Fam110c	CV
chr12	32239490	32239740	intronic	Slc26a4	CV
chr12	32397633	32397992	intronic	Gpr22	CV
chr12	32411842	32412092	intronic	Cog5	CV
chr12	32634930	32635378	exonic	Hbp1	CV
chr12	37517232	37517658	intergenic	Ispd	CV
chr12	37547257	37547507	intergenic	Ispd	CV
chr12	37966880	37967328	promoter	Tmem195	CV
chr12	37967474	37968516	promoter	Tmem195	CV
chr12	37971783	37972033	intronic	Tmem195	CV
chr12	37982076	37982326	intronic	Tmem195	CV
chr12	40866526	40866954	intergenic	Scin	CV
chr12	40870629	40871045	intergenic	Scin	CV
chr12	40873084	40873495	intergenic	Scin	CV
chr12	42044828	42045255	intronic	Immp2l	CV
chr12	45309897	45310147	intronic	Dnajb9	CV
chr12	48151058	48151308	intergenic	Nova1	CV
chr12	48934857	48935299	intergenic	Nova1	CV
chr12	51221464	51221714	intergenic	Prkd1	CV
chr12	51225231	51225481	intergenic	Prkd1	CV
chr12	52734264	52734818	intronic	Strn3	CV
chr12	52743240	52743490	intronic	Strn3	CV
chr12	52749259	52749509	promoter	Strn3	CV
chr12	59177661	59177911	intergenic	Sstr1	CV
chr12	65360325	65360575	intergenic	Fscb	CV
chr12	65374504	65374923	intergenic	Fscb	CV
chr12	65375011	65375261	intergenic	Fscb	CV
chr12	68160317	68161131	intronic	Mdga2	CV
chr12	70223929	70224179	intergenic	Rps29	CV
chr12	70463617	70463867	intergenic	Sdccag1	CV
chr12	70468274	70468714	intergenic	AK179786	CV
chr12	75905027	75905468	intergenic	Kcnh5	CV
chr12	75994112	75994362	intergenic	Kcnh5	CV
chr12	78558488	78558738	intronic	Fut8	CV
chr12	79326578	79326828	promoter	Gphn	CV
chr12	79478128	79478378	intronic	Gphn	CV
chr12	79861784	79862034	intronic	Mpp5	CV
chr12	79870173	79870423	intronic	Mpp5	CV
chr12	80599982	80600411	intronic	Rad51l1	CV
chr12	82619271	82619521	intronic	Synj2bp	CV
chr12	85251593	85251843	intronic	Numb	CV
chr12	85254445	85254695	intronic	Numb	CV
chr12	85255645	85255895	intronic	Numb	CV
chr12	85743773	85744023	promoter	Entpd5	CV
chr12	91235647	91235898	intronic	Nrxn3	CV
chr12	92416331	92416581	intronic	4930534B04Rik	CV
chr12	93638838	93639117	intergenic	Sel1l	CV
chr12	98299814	98300235	intergenic	AK145433	CV
chr12	98409037	98409287	intergenic	AK145433	CV
chr12	99504336	99504606	intergenic	Gpr65	CV
chr12	102946502	102946752	intronic	Tc2n	CV
chr13	3544045	3544295	intronic	Gdi2	CV
chr13	3575814	3576064	exonic	BC016423	CV
chr13	4036389	4036639	intergenic	Akr1c14	CV
chr13	4190344	4190594	promoter	Akr1c13	CV
chr13	4264157	4264594	intergenic	Akr1c12	CV
chr13	4278454	4278704	promoter	Akr1c12	CV
chr13	5366295	5366945	intergenic	AK006031	CV
chr13	5422471	5422721	intergenic	AK006031	CV
chr13	5424564	5425206	intergenic	AK006031	CV
chr13	5522926	5523176	intergenic	AK006031	CV
chr13	5535646	5535896	intergenic	AK006031	CV
chr13	5546430	5546680	intergenic	AK006031	CV
chr13	5547952	5548384	intergenic	AK006031	CV
chr13	5623606	5623856	intergenic	AK006031	CV
chr13	5630630	5630880	intergenic	AK006031	CV
chr13	5763021	5763449	intergenic	AK006031	CV
chr13	5916815	5917065	intergenic	Klf6	CV
chr13	6062067	6062317	intergenic	Klf6	CV
chr13	6105988	6106238	intergenic	Klf6	CV
chr13	6108574	6108824	intergenic	Klf6	CV
chr13	6204372	6204622	intergenic	Klf6	CV
chr13	6403701	6404193	intergenic	Pitrm1	CV
chr13	9010924	9011174	intergenic	Gtpbp4	CV
chr13	9011258	9011508	intergenic	Gtpbp4	CV
chr13	9277469	9277719	intronic	Dip2c	CV
chr13	12994020	12994270	intergenic	Prl2c5	CV
chr13	17718913	17719273	intronic	5033411D12Rik	CV
chr13	23625330	23625580	promoter	Hist1h3g	CV
chr13	23775784	23776200	promoter	Hist1h2bc	CV
chr13	23776602	23776852	promoter	Hist1h2ac	CV
chr13	23779231	23779481	intronic	Hist1h2bc	CV
chr13	23779810	23780060	intronic	Hist1h2bc	CV
chr13	23844084	23844334	promoter	Hist1h3b	CV
chr13	23854401	23854651	promoter	Hist1h4a	CV
chr13	28160980	28161230	intergenic	Prl4a1	CV
chr13	46791732	46792177	exonic	Nup153	CV
chr13	63917480	63917730	intronic	0610007P08Rik	CV
chr13	63942944	63943328	exonic	0610007P08Rik	CV
chr13	70314985	70315346	intergenic	AK006991	CV
chr13	74777923	74778173	intronic	Erap1	CV
chr13	74783839	74784164	exonic	Erap1	CV
chr13	74834315	74834727	intronic	Cast	CV
chr13	75095694	75095944	intergenic	Pcsk1	CV
chr13	76628263	76628513	intronic	Mctp1	CV
chr13	77343790	77344185	intronic	2210408I21Rik	CV
chr13	77577984	77578408	intronic	2210408I21Rik	CV
chr13	81418571	81418821	intronic	Gpr98	CV
chr13	81469937	81470373	intronic	Gpr98	CV
chr13	81526315	81526565	intronic	Gpr98	CV
chr13	81785089	81785339	intergenic	Lysmd3	CV
chr13	81932793	81933043	intronic	Cetn3	CV
chr13	83747639	83747889	intronic	Mef2c	CV
chr13	84362777	84363027	promoter	AK053270	CV
chr13	85421569	85421819	intronic	Rasa1	CV
chr13	86532716	86532966	intergenic	Cox7c	CV
chr13	90938780	90939030	intergenic	Atp6ap1l	CV
chr13	94112870	94113120	intronic	Homer1	CV
chr13	94123655	94123905	intronic	Homer1	CV
chr13	101097928	101098178	intergenic	Naip6	CV
chr13	104648948	104649360	intronic	Erbb2ip	CV
chr13	105082132	105082382	intronic	Adamts6	CV
chr13	105194452	105194702	intronic	Adamts6	CV
chr13	107648982	107649232	intronic	Ipo11	CV
chr13	109886421	109886671	intronic	Pde4d	CV
chr13	109886813	109887259	intronic	Pde4d	CV
chr13	110308975	110309398	intronic	Pde4d	CV
chr13	110483166	110483416	intronic	Pde4d	CV
chr13	110484167	110484417	intronic	Pde4d	CV
chr13	115613229	115613479	intronic	Mocs2	CV
chr13	115966484	115966734	intergenic	Itga1	CV
chr13	115986434	115986684	intergenic	Itga1	CV
chr13	115997813	115998063	intergenic	Itga1	CV
chr13	116244659	116244909	intergenic	Itga1	CV
chr13	116354593	116354843	intergenic	Itga1	CV
chr13	116396924	116397174	intergenic	Itga1	CV
chr13	116462162	116462412	intergenic	Itga1	CV
chr13	116463999	116464249	intergenic	Itga1	CV
chr13	116589244	116589494	intergenic	Isl1	CV
chr13	117407790	117408040	intergenic	Parp8	CV
chr14	11668556	11668806	intronic	Fhit	CV
chr14	17252017	17252267	intronic	Top2b	CV
chr14	21909863	21910113	intronic	Adk	CV
chr14	21993657	21994007	intronic	Adk	CV
chr14	32145481	32145931	intergenic	Capn7	CV
chr14	32402580	32402893	intergenic	Hacl1	CV
chr14	35095091	35095538	intronic	Fam35a	CV
chr14	36765082	36765381	intergenic	4930596D02Rik	CV
chr14	45441041	45441291	intergenic	Ptgdr	CV
chr14	49102319	49102569	intronic	6720456H20Rik	CV
chr14	49646659	49646909	intronic	Exoc5	CV
chr14	58706115	58706365	intronic	Fgf9	CV
chr14	63332974	63333224	exonic	Ints6	CV
chr14	68333968	68334218	promoter	Kctd9	CV
chr14	77417109	77417359	intergenic	9030625A04Rik	CV
chr14	81454813	81455175	intergenic	Olfm4	CV
chr14	82258446	82258864	intergenic	Olfm4	CV
chr14	94241946	94242196	intronic	Pcdh9	CV
chr14	98258366	98258816	intronic	Dach1	CV
chr14	98436293	98436543	intronic	Dach1	CV
chr14	99704355	99704605	exonic	Klf5	CV
chr14	100023669	100023919	intergenic	Klf12	CV
chr14	102272432	102272682	intronic	Lmo7	CV
chr14	102951849	102952099	intergenic	Kctd12	CV
chr14	105557641	105558067	intronic	Rbm26	CV
chr14	105643925	105644175	intergenic	Ndfip2	CV
chr14	106592947	106593197	intergenic	Trim52	CV
chr14	107113167	107113417	intergenic	AK007305	CV
chr14	110097219	110097541	intergenic	Slitrk1	CV
chr14	110276175	110276425	intergenic	Slitrk6	CV
chr14	110276507	110276923	intergenic	Slitrk6	CV
chr14	110814716	110814966	intergenic	Slitrk6	CV
chr14	110815772	110816210	intergenic	Slitrk6	CV
chr14	110844872	110845166	intergenic	Slitrk6	CV
chr14	111127698	111128112	intergenic	Slitrk6	CV
chr14	111153946	111154584	promoter	Slitrk6	CV
chr14	111945451	111945701	intergenic	Slitrk5	CV
chr14	119407246	119407496	promoter	Uggt2	CV
chr15	4118246	4118496	intergenic	Oxct1	CV
chr15	5766257	5766657	intergenic	BC023070	CV
chr15	5975489	5975939	intergenic	Dab2	CV
chr15	6685734	6685984	intronic	Rictor	CV
chr15	8396562	8396812	intronic	Nipbl	CV
chr15	13804546	13804839	intergenic	Cdh6	CV
chr15	16496275	16496525	intergenic	Cdh9	CV
chr15	16632172	16632422	intergenic	Cdh9	CV
chr15	16654292	16654542	intergenic	Cdh9	CV
chr15	16658168	16658592	intergenic	Cdh9	CV
chr15	16812073	16812323	intergenic	Cdh9	CV
chr15	16915753	16916003	intergenic	Cdh9	CV
chr15	16978912	16979326	intergenic	Cdh9	CV
chr15	21305309	21305559	intronic	Cdh12	CV
chr15	21306937	21307187	intronic	Cdh12	CV
chr15	31448173	31448494	intronic	2014-03-06	CV
chr15	33631570	33631820	intergenic	Tspyl5	CV
chr15	34937534	34937784	intronic	Stk3	CV
chr15	34945958	34946208	intronic	Stk3	CV
chr15	35982132	35982382	intronic	Rgs22	CV
chr15	39771150	39771400	intronic	Lrp12	CV
chr15	39773220	39773470	intronic	Lrp12	CV
chr15	41485241	41485630	intronic	Oxr1	CV
chr15	50941529	50941931	intergenic	Trps1	CV
chr15	52785531	52785781	intergenic	Ext1	CV
chr15	54217717	54217967	intergenic	Colec10	CV
chr15	64974848	64975098	intergenic	Adcy8	CV
chr15	73112890	73113140	intronic	Ptk2	CV
chr15	89037875	89038267	intergenic	Ppp6r2	CV
chr15	94062324	94062590	intergenic	Adamts20	CV
chr15	100572965	100573215	intergenic	AK146183	CV
chr16	3113282	3113902	intergenic	Olfr161	CV
chr16	3114445	3114894	intergenic	Olfr161	CV
chr16	3115241	3115491	intergenic	Olfr161	CV
chr16	3115639	3116088	intergenic	Olfr161	CV
chr16	11143852	11144102	intronic	Zc3h7a	CV
chr16	13061580	13061830	intergenic	Ercc4	CV
chr16	13894439	13894689	intronic	Pdxdc1	CV
chr16	16485603	16485853	intronic	Fgd4	CV
chr16	19446048	19446298	intergenic	Olfr165	CV
chr16	19459137	19459387	intergenic	Olfr166	CV
chr16	19666422	19666800	intronic	Lamp3	CV
chr16	22256777	22257027	intronic	Tra2b	CV
chr16	22260591	22260992	intronic	Tra2b	CV
chr16	22263276	22263526	intronic	Tra2b	CV
chr16	25953693	25953943	intergenic	Leprel1	CV
chr16	30217033	30217283	intergenic	Cpn2	CV
chr16	37233930	37234180	intronic	Stxbp5l	CV
chr16	38196485	38196735	intronic	Gsk3b	CV
chr16	42875579	42875829	promoter	AK016521	CV
chr16	43070138	43070588	intronic	Zbtb20	CV
chr16	43131104	43131354	intronic	Zbtb20	CV
chr16	43181167	43181417	intronic	Zbtb20	CV
chr16	44185382	44185632	intronic	Gm608	CV
chr16	45456003	45456424	intronic	Gm609	CV
chr16	45596305	45596555	intronic	Slc9a10	CV
chr16	46848971	46849416	intergenic	Pvrl3	CV
chr16	47536706	47536956	intergenic	Dppa4	CV
chr16	48404121	48404571	intronic	Gm5485	CV
chr16	52655030	52655280	intergenic	AK015072	CV
chr16	54229989	54230239	intergenic	Zpld1	CV
chr16	56491289	56491539	intronic	Abi3bp	CV
chr16	56491689	56492139	intronic	Abi3bp	CV
chr16	56798974	56799224	intergenic	Gpr128	CV
chr16	58722817	58723067	intergenic	Gpr15	CV
chr16	58726404	58726654	promoter	Cldnd1	CV
chr16	61056113	61056488	intergenic	Epha6	CV
chr16	64872922	64873172	intergenic	Cggbp1	CV
chr16	66013844	66014241	intergenic	Vgll3	CV
chr16	66022089	66022539	intergenic	Vgll3	CV
chr16	66023567	66023817	intergenic	Vgll3	CV
chr16	66145458	66145908	intergenic	Vgll3	CV
chr16	68428724	68429298	intergenic	Cadm2	CV
chr16	68951221	68951471	intergenic	Speer2	CV
chr16	68951779	68952401	intergenic	Speer2	CV
chr16	69104232	69104482	intergenic	Speer2	CV
chr16	70214258	70214508	intergenic	Gbe1	CV
chr16	75767811	75768061	promoter	Hspa13	CV
chr16	76864782	76865032	intergenic	AK038693	CV
chr16	77015129	77015379	intronic	Usp25	CV
chr16	77330038	77330288	intronic	AK051166	CV
chr16	77331299	77331549	intronic	AK051166	CV
chr16	77444409	77444659	intronic	AK051166	CV
chr16	78603160	78603610	intergenic	D16Ertd472e	CV
chr16	78974244	78974494	intronic	Tmprss15	CV
chr16	84016973	84017373	intergenic	AK019711	CV
chr16	94594073	94594444	promoter	Pigp	CV
chr17	3083839	3084689	promoter	Pisd-ps2	CV
chr17	15965525	15965929	promoter	Rgmb	CV
chr17	16605584	16605834	intergenic	Zfp960	CV
chr17	17142004	17142254	intergenic	Zfp960	CV
chr17	17793701	17794125	intergenic	Lnpep	CV
chr17	17900016	17900266	intergenic	Vmn2r90	CV
chr17	20208694	20209144	intergenic	Vmn2r104	CV
chr17	20798431	20798681	intergenic	Vmn1r226	CV
chr17	22099815	22100065	promoter	Zfp942	CV
chr17	22562145	22562395	intronic	Zfp946	CV
chr17	23235916	23236167	intergenic	Zfp40	CV
chr17	23325017	23325267	intronic	Zfp40	CV
chr17	23629108	23629373	intergenic	Vmn2r117	CV
chr17	33392204	33392654	promoter	Zfp955a	CV
chr17	39982132	39982382	intergenic	Mir715	CV
chr17	41010714	41010964	intergenic	9130008F23Rik	CV
chr17	43625320	43625764	intronic	Mep1a	CV
chr17	53001548	53001799	intronic	Kcnh8	CV
chr17	63690444	63690894	intronic	Fbxl17	CV
chr17	71716596	71716846	intronic	Smchd1	CV
chr17	76935025	76935275	intergenic	Gm4710	CV
chr17	77599620	77599870	intergenic	AK144664	CV
chr17	79087623	79087873	intronic	Strn	CV
chr17	81951797	81952047	intronic	Slc8a1	CV
chr17	83777392	83777642	intronic	Eml4	CV
chr17	84767476	84767726	intronic	Thada	CV
chr17	84768276	84768526	promoter	Thada	CV
chr17	88193869	88194120	intronic	Kcnk12	CV
chr17	91334219	91334669	intronic	Nrxn1	CV
chr17	91637892	91638142	intergenic	Nrxn1	CV
chr17	92395642	92395892	intergenic	AB352058	CV
chr17	93965748	93965998	intergenic	Adcyap1	CV
chr17	94073170	94073420	intergenic	Adcyap1	CV
chr17	94171576	94171826	intergenic	Adcyap1	CV
chr18	3007413	3007663	intergenic	Vmn1r238	CV
chr18	3335407	3335657	promoter	Gm6225	CV
chr18	3542460	3542710	intergenic	Bambi	CV
chr18	7868252	7868502	promoter	Wac	CV
chr18	8943198	8943448	intergenic	Fzd8	CV
chr18	11820659	11820909	intronic	Rbbp8	CV
chr18	13107266	13107714	intergenic	Osbpl1a	CV
chr18	13109936	13110186	intergenic	Osbpl1a	CV
chr18	15020194	15020586	intronic	Taf4b	CV
chr18	19682680	19683310	intergenic	Dsc3	CV
chr18	26610892	26611157	intergenic	AK076984	CV
chr18	28393435	28393838	intergenic	AK076809	CV
chr18	30659462	30659712	intergenic	Pik3c3	CV
chr18	33651447	33651697	intergenic	D0H4S114	CV
chr18	38088334	38088584	intronic	Diap1	CV
chr18	40377968	40378218	intronic	Yipf5	CV
chr18	43884305	43884555	intergenic	Spink3	CV
chr18	51290439	51290689	intronic	Prr16	CV
chr18	54014571	54014995	intergenic	Csnk1g3	CV
chr18	54103147	54103397	intronic	Csnk1g3	CV
chr18	55923057	55923307	intergenic	Gramd3	CV
chr18	56049438	56049688	intergenic	Gramd3	CV
chr18	56099049	56099299	intergenic	Gramd3	CV
chr18	87210536	87210873	intergenic	Cbln2	CV
chr18	88287033	88287283	intergenic	Socs6	CV
chr18	88942072	88942322	intronic	Socs6	CV
chr19	14729966	14730216	intergenic	Tle4	CV
chr19	14814653	14814903	intergenic	Tle4	CV
chr19	14823290	14823540	intergenic	Tle4	CV
chr19	14890891	14891141	intergenic	Tle4	CV
chr19	16748961	16749211	intronic	Vps13a	CV
chr19	20494947	20495302	intergenic	Anxa1	CV
chr19	20676157	20676407	promoter	Aldh1a1	CV
chr19	20955875	20956125	intronic	Tmc1	CV
chr19	29327415	29327665	intronic	Jak2	CV
chr19	29814075	29814325	intronic	9930021J03Rik	CV
chr19	29817995	29818245	exonic	9930021J03Rik	CV
chr19	29818395	29818645	intronic	9930021J03Rik	CV
chr19	33572658	33572908	intergenic	Lipo1	CV
chr19	34096180	34096430	exonic	Lipk	CV
chr19	34141308	34141558	promoter	Lipn	CV
chr19	34149070	34149320	intronic	Lipn	CV
chr19	34152477	34152727	intronic	Lipn	CV
chr19	37001774	37002024	intronic	Btaf1	CV
chr19	39819674	39819924	intergenic	Cyp2c68	CV
chr19	39894384	39894634	intergenic	Cyp2c40	CV
chr19	40696135	40696385	intronic	Entpd1	CV
chr19	41569952	41570378	intronic	Lcor	CV
chr19	43762472	43762722	promoter	Entpd7	CV
chr19	43842096	43842346	intronic	Cutc	CV
chr19	43852204	43852454	intergenic	Abcc2	CV
chr19	48922350	48922600	intergenic	Sorcs3	CV
chr19	52348297	52348547	intergenic	Ins1	CV
chr19	61342175	61342425	intergenic	Csf2ra	CV
chr2	15448178	15448428	intergenic	Arl5b	CV
chr2	17979617	17979867	intronic	Mllt10	CV
chr2	21126593	21126843	promoter	Thnsl1	CV
chr2	22443719	22443969	intronic	Myo3a	CV
chr2	22444319	22444569	intronic	Myo3a	CV
chr2	22444719	22444969	intronic	Myo3a	CV
chr2	22594714	22595149	intergenic	Apbb1ip	CV
chr2	37478923	37479173	intronic	Strbp	CV
chr2	38020153	38020403	intronic	Dennd1a	CV
chr2	38683217	38683467	intronic	Nr6a1	CV
chr2	38683605	38683855	intronic	Nr6a1	CV
chr2	39064716	39065102	intronic	Ppp6c	CV
chr2	44776170	44776420	intronic	Gtdc1	CV
chr2	47857475	47857725	intergenic	Acvr2a	CV
chr2	48399834	48400084	intergenic	Acvr2a	CV
chr2	48400230	48400480	intergenic	Acvr2a	CV
chr2	48400824	48401074	intergenic	Acvr2a	CV
chr2	48697244	48697494	intronic	Acvr2a	CV
chr2	48805402	48806231	promoter	Orc4	CV
chr2	51827552	51827802	intronic	Nmi	CV
chr2	58131755	58132005	intronic	AK144626	CV
chr2	59879508	59879758	intronic	Baz2b	CV
chr2	59958877	59959127	intronic	Baz2b	CV
chr2	60041672	60042116	intergenic	AK166079	CV
chr2	61432064	61432314	intronic	Tank	CV
chr2	61432864	61433114	intronic	Tank	CV
chr2	69193642	69193892	intergenic	Abcb11	CV
chr2	71732579	71732874	intronic	Pdk1	CV
chr2	72813852	72814102	intronic	Sp3	CV
chr2	74095308	74095958	intergenic	AK041976	CV
chr2	74103066	74103316	intergenic	AK041976	CV
chr2	80154811	80155261	promoter	Dnajc10	CV
chr2	83091348	83091598	intergenic	Zc3h15	CV
chr2	83488593	83488843	intronic	Zc3h15	CV
chr2	83489184	83489434	intronic	Zc3h15	CV
chr2	84219131	84219381	intronic	Calcrl	CV
chr2	85565847	85566097	intergenic	Olfr1009	CV
chr2	98169710	98170060	intergenic	Lrrc4c	CV
chr2	98502139	98503189	intergenic	Lrrc4c	CV
chr2	98503766	98504360	intergenic	Lrrc4c	CV
chr2	98506326	98507526	intergenic	Lrrc4c	CV
chr2	100325398	100325848	intergenic	B230118H07Rik	CV
chr2	100425501	100425751	intergenic	B230118H07Rik	CV
chr2	100492128	100492378	intergenic	B230118H07Rik	CV
chr2	104324621	104324871	intronic	Hipk3	CV
chr2	105744619	105745058	promoter	Immp1l	CV
chr2	105748458	105748708	intronic	Immp1l	CV
chr2	105749058	105749308	intronic	Immp1l	CV
chr2	107113958	107114371	intergenic	Kcna4	CV
chr2	109721309	109721744	intergenic	Lin7c	CV
chr2	109731810	109732060	intronic	Lin7c	CV
chr2	109832122	109832372	intronic	Lgr4	CV
chr2	110142035	110142430	intronic	Bbox1	CV
chr2	115275470	115275920	intergenic	3110099E03Rik	CV
chr2	115857026	115857360	intronic	Meis2	CV
chr2	116948682	116949099	intronic	Spred1	CV
chr2	120230236	120230486	promoter	Tmem87a	CV
chr2	122507173	122507423	exonic	Slc30a4	CV
chr2	122507565	122508207	exonic	Slc30a4	CV
chr2	124427372	124427622	intronic	Sema6d	CV
chr2	133564457	133564894	intergenic	Bmp2	CV
chr2	133565018	133565268	intergenic	Bmp2	CV
chr2	133576239	133576489	intergenic	Bmp2	CV
chr2	136717359	136717609	promoter	Mkks	CV
chr2	140640069	140640319	intronic	Macrod2	CV
chr2	140721312	140721562	intronic	Macrod2	CV
chr2	140898789	140899205	intronic	Macrod2	CV
chr2	146191400	146191650	intronic	Ralgapa2	CV
chr2	147543250	147543500	exonic	AK079921	CV
chr2	150043787	150044037	promoter	Zfp937	CV
chr2	150046969	150047219	intronic	Zfp937	CV
chr2	150855975	150856396	exonic	Nanp	CV
chr2	155175981	155176288	intronic	Pigu	CV
chr2	156004373	156004739	promoter	Rbm39	CV
chr2	161482306	161482556	promoter	Ptprt	CV
chr2	163239110	163239479	intronic	3230401D17Rik	CV
chr2	168804406	168804788	intergenic	AK006070	CV
chr2	177757827	177758077	promoter	Etohi1	CV
chr2	181665991	181666241	intergenic	Polr3k	CV
chr3	3618480	3618905	intronic	Hnf4g	CV
chr3	3627113	3627701	intronic	Hnf4g	CV
chr3	3633966	3634416	intronic	Hnf4g	CV
chr3	3640010	3640352	intronic	Hnf4g	CV
chr3	3640763	3641107	intronic	Hnf4g	CV
chr3	3643555	3643968	intronic	Hnf4g	CV
chr3	15513845	15514095	intronic	LOC100038947	CV
chr3	21010766	21011016	intergenic	AB345949	CV
chr3	33698103	33698353	promoter	Ttc14	CV
chr3	35658242	35658492	intronic	Atp11b	CV
chr3	37334435	37334685	intronic	Spata5	CV
chr3	37388989	37389386	intronic	Spata5	CV
chr3	40603587	40603837	promoter	Plk4	CV
chr3	44110280	44110604	intergenic	AK012035	CV
chr3	49644888	49645138	intergenic	Pcdh18	CV
chr3	49653908	49654158	intergenic	Pcdh18	CV
chr3	55849661	55849911	intronic	Nbea	CV
chr3	55850003	55850253	intronic	Nbea	CV
chr3	55850345	55850595	intronic	Nbea	CV
chr3	56379303	56379746	intergenic	Nbea	CV
chr3	57165067	57165361	intergenic	Tm4sf1	CV
chr3	58238401	58238651	intronic	Tsc22d2	CV
chr3	58381157	58381407	intronic	2810407C02Rik	CV
chr3	59613218	59613468	intronic	4930449A18Rik	CV
chr3	59617488	59617738	intronic	4930449A18Rik	CV
chr3	59973323	59973573	intergenic	Sucnr1	CV
chr3	60129049	60129299	intergenic	Mbnl1	CV
chr3	60690729	60690979	intergenic	Ube2v1	CV
chr3	60853481	60853731	intergenic	P2ry1	CV
chr3	62296799	62297049	intronic	Dhx36	CV
chr3	63102038	63102483	promoter	Mme	CV
chr3	63701122	63701372	intronic	BC048720	CV
chr3	65319675	65319925	intronic	4931440P22Rik	CV
chr3	65353810	65354060	intronic	Tiparp	CV
chr3	66889074	66889324	exonic	Rsrc1	CV
chr3	66948793	66949043	intronic	Rsrc1	CV
chr3	68913757	68914007	intronic	Kpna4	CV
chr3	72321882	72322132	intergenic	Sis	CV
chr3	72769837	72770087	intronic	Sis	CV
chr3	72770550	72770800	promoter	Sis	CV
chr3	72801223	72801473	intergenic	Sis	CV
chr3	72801623	72802073	intergenic	Sis	CV
chr3	72803145	72803557	intergenic	Sis	CV
chr3	73441802	73442052	exonic	Bche	CV
chr3	73497539	73497789	intronic	Bche	CV
chr3	73521377	73521627	intergenic	Bche	CV
chr3	73521747	73521997	intergenic	Bche	CV
chr3	74340440	74340690	intergenic	Zbbx	CV
chr3	75009527	75009777	intergenic	Serpini2	CV
chr3	75141312	75141562	intergenic	Serpini2	CV
chr3	75360735	75360985	promoter	Pdcd10	CV
chr3	79856710	79857160	intergenic	Fam198b	CV
chr3	83580002	83580252	intronic	AK137033	CV
chr3	84883078	84883328	intronic	Arfip1	CV
chr3	86031731	86031981	intronic	Lrba	CV
chr3	86346158	86346408	intronic	Lrba	CV
chr3	95392591	95392841	promoter	Golph3l	CV
chr3	95402559	95402809	intronic	Golph3l	CV
chr3	96044138	96044588	promoter	Hist2h2aa2	CV
chr3	99784865	99785515	intronic	Spag17	CV
chr3	100488238	100488488	exonic	Man1a2	CV
chr3	103946285	103946535	intronic	Magi3	CV
chr3	106331064	106331314	intronic	Cept1	CV
chr3	107135826	107136476	promoter	Rbm15	CV
chr3	107304189	107304439	promoter	Slc6a17	CV
chr3	109599003	109599253	intronic	Ntng1	CV
chr3	110261849	110262099	intergenic	Prmt6	CV
chr3	112894262	112894512	intergenic	Amy2b	CV
chr3	113462567	113462818	intergenic	AK017534	CV
chr3	117427396	117427646	intergenic	4833424O15Rik	CV
chr3	117428323	117428714	intergenic	4833424O15Rik	CV
chr3	117578292	117578542	intergenic	Snx7	CV
chr3	117581089	117581339	intergenic	Snx7	CV
chr3	118827917	118828299	intronic	Dpyd	CV
chr3	118829140	118829390	intronic	Dpyd	CV
chr3	119405060	119405310	intergenic	Ptbp2	CV
chr3	122466602	122467048	intronic	Pde5a	CV
chr3	122582108	122582358	intronic	AK016661	CV
chr3	129668412	129668749	intronic	Ccdc109b	CV
chr3	133699481	133699731	intronic	AK034519	CV
chr3	135569865	135570115	intergenic	Slc39a8	CV
chr3	136623758	136624008	intergenic	Ppp3ca	CV
chr3	137797381	137797631	intronic	Mttp	CV
chr3	137987109	137987359	intronic	Adh6a	CV
chr3	142006023	142006273	intronic	Pdlim5	CV
chr3	142504700	142504950	intronic	Pkn2	CV
chr3	143486034	143486284	intergenic	AK043613	CV
chr3	146447634	146447884	intronic	Prkacb	CV
chr3	151868994	151869386	intronic	Dnajb4	CV
chr3	157693433	157693683	intronic	Srsf11	CV
chr3	159504679	159504929	intronic	Wls	CV
chr3	159505479	159505729	intronic	Wls	CV
chr4	3016854	3017104	intergenic	Vmn1r2	CV
chr4	3017242	3017880	intergenic	Vmn1r2	CV
chr4	3018018	3018462	intergenic	Vmn1r2	CV
chr4	6003985	6004381	intronic	Fam110b	CV
chr4	7239268	7239718	intergenic	Tox	CV
chr4	10068766	10069016	intergenic	4930448K20Rik	CV
chr4	12834427	12834677	intronic	Gm11818	CV
chr4	17594749	17594999	intergenic	Mmp16	CV
chr4	19297090	19297379	intronic	Cngb3	CV
chr4	21769560	21769810	intergenic	4930528A17Rik	CV
chr4	28739848	28740098	promoter	Epha7	CV
chr4	28740248	28740498	promoter	Epha7	CV
chr4	35014692	35014968	intronic	Mobkl2b	CV
chr4	35898296	35898734	intronic	Lingo2	CV
chr4	35935886	35936136	intronic	Lingo2	CV
chr4	35939405	35939855	intronic	Lingo2	CV
chr4	35940205	35940455	intronic	Lingo2	CV
chr4	35941005	35941455	intronic	Lingo2	CV
chr4	36042459	36042883	intronic	Lingo2	CV
chr4	36508328	36508578	intronic	Lingo2	CV
chr4	44891517	44891767	intronic	Zcchc7	CV
chr4	47916825	47917075	intergenic	AK133250	CV
chr4	48136216	48136466	promoter	Stx17	CV
chr4	52189203	52189641	intergenic	AK012547	CV
chr4	52190110	52190360	intergenic	AK012547	CV
chr4	58911162	58911412	intronic	AI314180	CV
chr4	70039108	70039358	intronic	Cdk5rap2	CV
chr4	70887592	70887842	intergenic	Megf9	CV
chr4	70999571	71000003	intergenic	AK083054	CV
chr4	71015392	71015642	intergenic	AK083054	CV
chr4	71017153	71017593	intergenic	AK083054	CV
chr4	71018103	71018543	intergenic	AK083054	CV
chr4	75801306	75801556	intronic	Ptprd	CV
chr4	75801682	75802120	intronic	Ptprd	CV
chr4	75887395	75887645	intronic	Ptprd	CV
chr4	75984816	75985066	intronic	Ptprd	CV
chr4	79648775	79649025	intergenic	Tyrp1	CV
chr4	79649375	79649825	intergenic	Tyrp1	CV
chr4	80594389	80594639	intronic	D4Bwg0951e	CV
chr4	83855138	83855388	intergenic	Bnc2	CV
chr4	88567305	88567555	intergenic	Mir31	CV
chr4	89100323	89100573	intronic	AK148321	CV
chr4	91058200	91058503	intronic	Elavl2	CV
chr4	94317364	94317952	promoter	Lrrc19	CV
chr4	94327489	94327939	exonic	Ift74	CV
chr4	95207267	95207517	intergenic	Fggy	CV
chr4	102798332	102798582	intronic	Mier1	CV
chr4	109338210	109338460	promoter	Cdkn2c	CV
chr4	112914570	112914820	intronic	Skint6	CV
chr4	114951371	114951621	intergenic	Cyp4a12a	CV
chr4	121870987	121871237	intergenic	9530002B09Rik	CV
chr4	143889353	143889737	intergenic	Pramel4	CV
chr5	3800942	3801340	promoter	Krit1	CV
chr5	4869021	4869358	intronic	Cdk14	CV
chr5	5117244	5117649	intronic	Cdk14	CV
chr5	9495883	9496133	intronic	Grm3	CV
chr5	15815305	15815555	intronic	Cacna2d1	CV
chr5	16060708	16060958	intronic	Hgf	CV
chr5	16631095	16631523	intergenic	Speer4f	CV
chr5	16647109	16647359	intergenic	Speer4f	CV
chr5	16914662	16915112	intergenic	Speer4f	CV
chr5	16925826	16926076	intergenic	Speer4f	CV
chr5	17107525	17107775	intronic	Sema3c	CV
chr5	17220834	17221084	intronic	Sema3c	CV
chr5	17334895	17335145	intronic	Cd36	CV
chr5	22939041	22939491	promoter	AK017143	CV
chr5	24930069	24930519	intronic	Mll3	CV
chr5	32079432	32079682	intronic	Bre	CV
chr5	33073302	33073552	intergenic	Pisd	CV
chr5	44166692	44167196	intronic	Fbxl5	CV
chr5	45340787	45341168	intergenic	Ldb2	CV
chr5	46307499	46307749	intergenic	Lcorl	CV
chr5	46424107	46424357	intergenic	Lcorl	CV
chr5	46424507	46424757	intergenic	Lcorl	CV
chr5	48142877	48143127	intergenic	Slit2	CV
chr5	49070729	49070979	intronic	Kcnip4	CV
chr5	49071314	49071564	intronic	Kcnip4	CV
chr5	51177237	51177487	intergenic	AK030154	CV
chr5	51186035	51186285	intergenic	AK030154	CV
chr5	51305681	51305931	intergenic	AK030154	CV
chr5	51306646	51306896	intergenic	AK030154	CV
chr5	60183351	60183601	intergenic	BC099582	CV
chr5	60433950	60434200	intergenic	BC099582	CV
chr5	60434248	60434498	intergenic	BC099582	CV
chr5	63209696	63209991	intronic	Dthd1	CV
chr5	64910193	64910443	intergenic	AK021093	CV
chr5	72112730	72112980	intronic	Gabrb1	CV
chr5	76729620	76729943	intronic	Clock	CV
chr5	80558604	80558854	intergenic	Lphn3	CV
chr5	81856373	81856753	intronic	Lphn3	CV
chr5	83864471	83864738	intergenic	Tecrl	CV
chr5	87429973	87430223	exonic	Ugt2b35	CV
chr5	87444452	87444702	intergenic	Ugt2b35	CV
chr5	87825897	87826147	intergenic	Ugt2b38	CV
chr5	87991491	87991941	intronic	Sult1d1	CV
chr5	87996394	87996644	intronic	Sult1d1	CV
chr5	88002879	88003129	intergenic	Sult1e1	CV
chr5	88416436	88416773	intergenic	4931407G18Rik	CV
chr5	88799898	88800148	intergenic	Amtn	CV
chr5	90082876	90083126	intergenic	Adamts3	CV
chr5	92390670	92390920	promoter	Thap6	CV
chr5	96564641	96564891	intronic	Cnot6l	CV
chr5	98313038	98313412	intergenic	Antxr2	CV
chr5	98978668	98978918	intronic	1700007G11Rik	CV
chr5	99754404	99754654	intronic	A930011G23Rik	CV
chr5	110565549	110565799	exonic	Chfr	CV
chr5	126332633	126332883	intergenic	Tmem132b	CV
chr5	131395650	131396023	intronic	Wbscr17	CV
chr5	138362881	138363131	promoter	Cyp3a13	CV
chr6	3459830	3460080	intronic	Ccdc132	CV
chr6	3867256	3867506	intergenic	Tfpi2	CV
chr6	7258753	7259003	exonic	AK133014	CV
chr6	7796752	7797002	intronic	C1galt1	CV
chr6	9839797	9840047	intergenic	Nxph1	CV
chr6	10595549	10595832	intergenic	AA545190	CV
chr6	11969866	11970116	intronic	Phf14	CV
chr6	12009918	12010168	intronic	Phf14	CV
chr6	12722661	12722911	intergenic	Thsd7a	CV
chr6	18037644	18037894	intronic	Asz1	CV
chr6	18040121	18040371	intronic	Asz1	CV
chr6	18130962	18131212	intronic	Cftr	CV
chr6	18132954	18133204	intronic	Cftr	CV
chr6	18198316	18198966	intronic	Cftr	CV
chr6	18199695	18199945	intronic	Cftr	CV
chr6	18204607	18204988	promoter	Cftr	CV
chr6	22028594	22028844	intronic	A430107O13Rik	CV
chr6	24057134	24057384	intronic	Slc13a1	CV
chr6	24213884	24214134	intergenic	Slc13a1	CV
chr6	24260728	24260978	intergenic	AB351165	CV
chr6	40578426	40578873	promoter	Mgam	CV
chr6	40584596	40585038	intronic	Mgam	CV
chr6	40768662	40768912	intergenic	Mgam	CV
chr6	43624944	43625194	intergenic	Tpk1	CV
chr6	45091243	45091493	intronic	Cntnap2	CV
chr6	47445750	47446000	intronic	Cul1	CV
chr6	49186310	49186760	intergenic	Tra2a	CV
chr6	51957509	51957759	intronic	Skap2	CV
chr6	57979285	57979535	intergenic	Vmn1r26	CV
chr6	58579190	58579440	intronic	Abcg2	CV
chr6	59266170	59266420	intergenic	Gprin3	CV
chr6	60636999	60637368	intergenic	Snca	CV
chr6	61474229	61474479	intronic	Fam190a	CV
chr6	61995075	61995325	intronic	Fam190a	CV
chr6	66332651	66333086	intergenic	Mad2l1	CV
chr6	68395110	68395360	intronic	abParts	CV
chr6	68826882	68827209	intronic	abParts	CV
chr6	70645303	70645553	intronic	abParts	CV
chr6	78291673	78291923	intergenic	Reg3b	CV
chr6	78316849	78317099	intergenic	Reg3b	CV
chr6	79005026	79005276	intergenic	AK135973	CV
chr6	79767941	79768343	promoter	Mtrnr2l	CV
chr6	96103920	96104228	intronic	Fam19a1	CV
chr6	103598877	103599421	intronic	Chl1	CV
chr6	106722778	106723028	intronic	Trnt1	CV
chr6	128819985	128820235	intronic	BC035044	CV
chr6	129051828	129052078	promoter	Clec2e	CV
chr6	129189825	129190251	promoter	AK036632	CV
chr6	131244745	131244995	promoter	Magohb	CV
chr6	133292010	133292260	intergenic	5530400C23Rik	CV
chr6	134701383	134701633	intronic	Dusp16	CV
chr6	136473315	136473565	intronic	Atf7ip	CV
chr6	136474115	136474365	intronic	Atf7ip	CV
chr6	139134441	139134691	intergenic	AK132719	CV
chr6	139134841	139135091	intergenic	AK132719	CV
chr6	141251225	141251675	intronic	Pde3a	CV
chr6	146600124	146600374	intergenic	Med21	CV
chr6	148143059	148143309	intronic	Ergic2	CV
chr7	14487554	14487894	intergenic	Sult2a4	CV
chr7	20652625	20652875	intronic	Nlrp9b	CV
chr7	47073718	47073968	intergenic	AK019774	CV
chr7	48755208	48755458	promoter	AW146154	CV
chr7	59265722	59265972	intergenic	1700015G11Rik	CV
chr7	59511721	59511971	intergenic	1700015G11Rik	CV
chr7	60250412	60250703	intergenic	DQ720673	CV
chr7	63383450	63383883	intronic	Herc2	CV
chr7	66498638	66498888	intronic	Ube3a	CV
chr7	67267398	67267648	intronic	Snrpn	CV
chr7	67278109	67278359	intronic	Snrpn	CV
chr7	68360394	68360732	intronic	DOKist4	CV
chr7	74504868	74505118	intronic	Mef2a	CV
chr7	75778781	75779061	intergenic	Gm5334	CV
chr7	77362365	77362615	intergenic	AK049871	CV
chr7	78397448	78397698	intergenic	AK020061	CV
chr7	80678842	80679092	intronic	Chd2	CV
chr7	89798998	89799248	promoter	Fam154b	CV
chr7	91667136	91667386	intergenic	AK199694	CV
chr7	97280463	97280713	intronic	Picalm	CV
chr7	97290054	97290478	intronic	Picalm	CV
chr7	97293823	97294073	intronic	Picalm	CV
chr7	99891440	99891690	promoter	AK084903	CV
chr7	108397938	108398188	intronic	Fchsd2	CV
chr7	111730207	111730457	intergenic	Olfr653	CV
chr7	111730589	111730839	intergenic	Olfr653	CV
chr7	117582682	117583132	intronic	Sbf2	CV
chr7	117661727	117662004	intronic	Sbf2	CV
chr7	117756019	117756269	intronic	Sbf2	CV
chr7	118013628	118013928	exonic	Mrvi1	CV
chr7	119169079	119169329	intronic	Usp47	CV
chr7	122937874	122938124	intronic	Sox6	CV
chr7	123569187	123569601	intronic	Pik3c2a	CV
chr7	125359278	125359700	intronic	Smg1	CV
chr7	136736191	136736441	intronic	Wdr11	CV
chr7	138597353	138597603	intergenic	Acadsb	CV
chr7	147628978	147629228	intergenic	Olfr533	CV
chr8	3754244	3754681	intergenic	Cd209a	CV
chr8	4656497	4657027	intergenic	Zfp958	CV
chr8	5073682	5074108	intergenic	Slc10a2	CV
chr8	5076904	5077354	intergenic	Slc10a2	CV
chr8	5105683	5105933	promoter	Slc10a2	CV
chr8	6073770	6074020	intergenic	Slc10a2	CV
chr8	6188297	6188547	intergenic	Slc10a2	CV
chr8	7060552	7060802	intergenic	AK082314	CV
chr8	9963620	9963956	intergenic	Lig4	CV
chr8	14355301	14355551	intronic	Dlgap2	CV
chr8	18991223	18991473	promoter	Defb37	CV
chr8	19691477	19691727	exonic	AK134636	CV
chr8	19699019	19699269	intergenic	AK134636	CV
chr8	19753588	19753838	exonic	4930467E23Rik	CV
chr8	19765524	19765774	intergenic	4930467E23Rik	CV
chr8	19801236	19801486	intergenic	5330429B09Rik	CV
chr8	19885194	19885633	intronic	6820431F20Rik	CV
chr8	20012587	20012837	intronic	6820431F20Rik	CV
chr8	23476160	23476410	exonic	Tpte	CV
chr8	24205798	24206248	intronic	Ank1	CV
chr8	26713849	26714099	intronic	Whsc1l1	CV
chr8	27034365	27034615	intronic	Kcnu1	CV
chr8	31789551	31789841	intergenic	Dusp26	CV
chr8	39058171	39058604	intronic	Sgcz	CV
chr8	43272428	43272678	intergenic	Zfp353	CV
chr8	44136312	44136562	intergenic	Triml1	CV
chr8	45403457	45403707	intergenic	Adam34	CV
chr8	45541608	45541858	intergenic	Fat1	CV
chr8	58572942	58573192	intronic	Glra3	CV
chr8	58598916	58599166	intronic	Glra3	CV
chr8	58757036	58757286	intergenic	Hpgd	CV
chr8	58818806	58819056	intergenic	Hpgd	CV
chr8	58875147	58875397	intergenic	Hpgd	CV
chr8	58885138	58885388	intergenic	Hpgd	CV
chr8	60563038	60563327	intronic	Galntl6	CV
chr8	64481039	64481289	intronic	Ddx60	CV
chr8	65164490	65164740	intergenic	Spock3	CV
chr8	66739479	66739743	intergenic	Tll1	CV
chr8	74313266	74313516	intergenic	AK142664	CV
chr8	75843334	75843584	intronic	Large	CV
chr8	78998287	78998719	intergenic	Gm10649	CV
chr8	79007271	79007911	intergenic	Gm10649	CV
chr8	79143268	79143518	intergenic	Gm10649	CV
chr8	79270197	79270547	intergenic	Gm10649	CV
chr8	79430456	79431004	intronic	Nr3c2	CV
chr8	84917958	84918208	intronic	Il15	CV
chr8	91239456	91239706	intronic	Cyld	CV
chr8	91246822	91247072	exonic	Cyld	CV
chr8	92464072	92464346	intergenic	Tox3	CV
chr8	93031468	93031788	intergenic	AK019563	CV
chr8	99392709	99392959	intergenic	AK006709	CV
chr8	108581157	108581469	promoter	Nfatc3	CV
chr8	110118156	110118406	intergenic	Psmd7	CV
chr8	112330949	112331199	intronic	Ap1g1	CV
chr9	3000000	3000250	intergenic	DQ702609	CV
chr9	3000380	3000630	intergenic	DQ702609	CV
chr9	3000760	3001390	intergenic	DQ702609	CV
chr9	3002090	3002512	intergenic	DQ702609	CV
chr9	3004014	3004264	intergenic	DQ702609	CV
chr9	3004414	3004864	intergenic	DQ702609	CV
chr9	3005014	3005264	intergenic	DQ702609	CV
chr9	3005414	3006264	intergenic	DQ702609	CV
chr9	3006414	3006664	intergenic	DQ702609	CV
chr9	3007014	3007664	intergenic	DQ702609	CV
chr9	3008272	3008586	intergenic	DQ702609	CV
chr9	3008783	3009833	intergenic	DQ702609	CV
chr9	3010183	3010433	intergenic	DQ702609	CV
chr9	3011178	3012028	intergenic	DQ702609	CV
chr9	3012178	3012828	intergenic	DQ702609	CV
chr9	3012978	3013428	intergenic	DQ702609	CV
chr9	3013498	3013872	intergenic	DQ702609	CV
chr9	3014117	3014597	intergenic	DQ702609	CV
chr9	3015085	3015535	intergenic	DQ702609	CV
chr9	3015885	3016535	intergenic	DQ702609	CV
chr9	3016666	3017144	intergenic	DQ702609	CV
chr9	3018134	3019584	intergenic	DQ702609	CV
chr9	3019734	3020184	intergenic	DQ702609	CV
chr9	3020900	3021316	intergenic	DQ702609	CV
chr9	3021919	3022317	intergenic	DQ702609	CV
chr9	3022853	3023103	intergenic	DQ702609	CV
chr9	3023687	3024137	intergenic	DQ702609	CV
chr9	3024687	3024937	intergenic	DQ702609	CV
chr9	3025087	3025737	intergenic	DQ702609	CV
chr9	3026287	3027537	intergenic	DQ702609	CV
chr9	3028087	3028937	intergenic	DQ702609	CV
chr9	3029287	3030537	intergenic	DQ702609	CV
chr9	3031287	3032137	intergenic	DQ702609	CV
chr9	3032287	3032737	intergenic	DQ702609	CV
chr9	3033087	3033337	intergenic	DQ702609	CV
chr9	3034045	3034659	intergenic	DQ702609	CV
chr9	3035107	3035557	intergenic	DQ702609	CV
chr9	3035707	3036757	intergenic	DQ702609	CV
chr9	3037094	3037344	intergenic	DQ702609	CV
chr9	3037694	3037944	intergenic	DQ702609	CV
chr9	3038094	3038544	intergenic	DQ702609	CV
chr9	5296878	5297128	promoter	Casp1	CV
chr9	5298343	5298593	promoter	Casp1	CV
chr9	5308753	5309003	promoter	Casp4	CV
chr9	5311552	5311802	intronic	Casp4	CV
chr9	11436106	11436356	intergenic	Cntn5	CV
chr9	11436506	11436756	intergenic	Cntn5	CV
chr9	14080365	14080615	promoter	Sesn3	CV
chr9	15362818	15363068	intergenic	Ccdc67	CV
chr9	17472765	17473171	intergenic	Chordc1	CV
chr9	17479753	17480190	intergenic	Chordc1	CV
chr9	17480501	17480751	intergenic	Chordc1	CV
chr9	19715726	19716025	intergenic	Olfr77	CV
chr9	32042396	32042846	intronic	Arhgap32	CV
chr9	35112559	35113409	intergenic	Rpusd4	CV
chr9	53042698	53042965	intronic	Ddx10	CV
chr9	54525676	54525926	intergenic	Acsbg1	CV
chr9	55654767	55655017	exonic	Scaper	CV
chr9	58441618	58441868	intronic	Nptn	CV
chr9	58826443	58826693	intronic	Neo1	CV
chr9	58837349	58837599	intronic	Neo1	CV
chr9	58841467	58841717	intronic	Neo1	CV
chr9	71788288	71788538	intronic	Tcf12	CV
chr9	71879177	71879427	intronic	Tcf12	CV
chr9	72154219	72154469	intronic	Zfp280d	CV
chr9	76376435	76376830	intronic	Fam83b	CV
chr9	76427758	76428008	intergenic	Fam83b	CV
chr9	76429637	76429887	intergenic	Fam83b	CV
chr9	76429933	76430183	intergenic	Fam83b	CV
chr9	76430635	76431008	intergenic	Fam83b	CV
chr9	77077719	77077969	intronic	2310046A06Rik	CV
chr9	77393794	77394244	promoter	Lrrc1	CV
chr9	78065261	78065511	intergenic	Gsta4	CV
chr9	79632888	79633138	intronic	Tmem30a	CV
chr9	80574904	80575154	intergenic	Impg1	CV
chr9	82867117	82867367	intronic	Phip	CV
chr9	85398800	85399050	intergenic	Fam46a	CV
chr9	89465255	89465505	intergenic	AF529169	CV
chr9	92188567	92188817	intronic	Plscr2	CV
chr9	92268792	92269042	intergenic	1700057G04Rik	CV
chr9	92269592	92270042	intergenic	1700057G04Rik	CV
chr9	100684942	100685372	intronic	Stag1	CV
chr9	100685482	100685732	intronic	Stag1	CV
chr9	113671473	113671723	intronic	Clasp2	CV
chr9	117951659	117951909	promoter	AK013480	CV
chr9	117954085	117954335	intronic	Azi2	CV
chr9	118058199	118058449	promoter	AK039053	CV
chrX	3846577	3846948	intergenic	Gm14347	CV
chrX	9486965	9487215	intronic	Sytl5	CV
chrX	9792996	9793246	intronic	Rpgr	CV
chrX	10038773	10039023	intergenic	Tspan7	CV
chrX	10291936	10292186	intergenic	Mid1ip1	CV
chrX	13295425	13295675	intronic	Cask	CV
chrX	13340582	13340832	intronic	Cask	CV
chrX	16130648	16131057	intergenic	Cypt8	CV
chrX	16139676	16139926	intergenic	Cypt8	CV
chrX	16203657	16203907	intronic	Maoa	CV
chrX	21142441	21142825	intergenic	Agtr2	CV
chrX	21163124	21163374	intergenic	Agtr2	CV
chrX	23268320	23268770	promoter	Wdr44	CV
chrX	23269381	23269631	promoter	Wdr44	CV
chrX	23293997	23294247	intronic	Wdr44	CV
chrX	23331795	23332190	intronic	Wdr44	CV
chrX	23762179	23762429	intergenic	Gm4907	CV
chrX	24731142	24731392	intergenic	Gm5169	CV
chrX	39899645	39899895	intronic	Odz1	CV
chrX	41039713	41039963	intergenic	Gm362	CV
chrX	41093327	41093755	intergenic	Gm362	CV
chrX	51100828	51101265	promoter	Xlr	CV
chrX	51137816	51138066	intergenic	Xlr	CV
chrX	53520939	53521189	intergenic	AK005539	CV
chrX	54017057	54017307	intronic	Fhl1	CV
chrX	65083008	65083258	intergenic	4933436I01Rik	CV
chrX	65939549	65939943	intronic	Fmr1	CV
chrX	68469822	68470072	intronic	Mtm1	CV
chrX	70904429	70904793	intronic	Pnck	CV
chrX	72893333	72893731	intergenic	Rab39b	CV
chrX	72893777	72894027	intergenic	Rab39b	CV
chrX	72894765	72895182	intergenic	Rab39b	CV
chrX	72900988	72901769	intergenic	4933407K13Rik	CV
chrX	72906302	72906732	intergenic	4933407K13Rik	CV
chrX	72909128	72909378	intergenic	4933407K13Rik	CV
chrX	72909996	72910530	intergenic	4933407K13Rik	CV
chrX	72911032	72912046	intergenic	4933407K13Rik	CV
chrX	72912763	72913387	intergenic	4933407K13Rik	CV
chrX	72913698	72914135	intergenic	4933407K13Rik	CV
chrX	72917086	72917520	intergenic	4933407K13Rik	CV
chrX	72917667	72917917	intergenic	4933407K13Rik	CV
chrX	81351426	81351676	intronic	Dmd	CV
chrX	82828300	82828744	intronic	Tab3	CV
chrX	82989132	82989382	exonic	Gyk	CV
chrX	87900749	87901048	intergenic	Gm44	CV
chrX	92043625	92044075	promoter	Zxda	CV
chrX	93650253	93650503	promoter	Heph	CV
chrX	101603594	101603844	intronic	Abcb7	CV
chrX	101685131	101685381	intronic	Uprt	CV
chrX	106332163	106332413	intronic	Sh3bgrl	CV
chrX	109551805	109552055	intergenic	Satl1	CV
chrX	109608703	109609153	promoter	2010106E10Rik	CV
chrX	109618710	109618960	intronic	2010106E10Rik	CV
chrX	109829698	109829948	intergenic	Pof1b	CV
chrX	109830430	109830680	intergenic	Pof1b	CV
chrX	118415478	118415728	intergenic	Pcdh11x	CV
chrX	120775080	120775330	intergenic	Vmn2r89	CV
chrX	122711556	122711806	intergenic	4932411N23Rik	CV
chrX	125880807	125881057	intergenic	Diap2	CV
chrX	126424209	126424493	intronic	Diap2	CV
chrX	132882184	132882434	intergenic	Ngfrap1	CV
chrX	136096978	136097228	intergenic	D330045A20Rik	CV
chrX	136131001	136131251	intergenic	Rnf128	CV
chrX	137210720	137210970	promoter	Mid2	CV
chrX	139917341	139917841	intergenic	Pak3	CV
chrX	156504804	156505054	intronic	Map3k15	CV
chrX	157547636	157548061	intergenic	Scml2	CV
chrX	165897959	165898384	intergenic	AK051847	CV
chrX	165909726	165909976	intergenic	AK051847	CV

## Sheet: CRvs.CV_colon_FDR<0.0001
Table S7: DHS putatively differential in the presence and absence of microbiota at FDR < 0.0001
chrom	start	stop	genic feature	nearest gene	Direction
None

## Sheet: CRvs.CV_colon_FDR<0.05
Table S7: DHS putatively differential in the presence and absence of microbiota at FDR < 0.05
chrom	start	stop	genic feature	nearest gene	Direction
chr1	138272746	138272996	intergenic	Camsap1l1	CV
chr13	79879793	79880063	intergenic	Arrdc3	CV
chr2	168804411	168804791	intergenic	AK006070	CV
chr4	127284623	127284873	intergenic	AK039749	CV
chr5	131395768	131396018	intronic	Wbscr17	CV
chr8	51569258	51569613	intronic	AK006131	CV

## Sheet: CRvs.GF_colon_FDR<0.0001
Table S7: DHS putatively differential in the presence and absence of microbiota at FDR < 0.0001
chrom	start	stop	genic feature	nearest gene
None

## Sheet: CRvs.GF_colon_FDR<0.05
Table S7: DHS putatively differential in the presence and absence of microbiota at FDR < 0.05
chrom	start	stop	genic feature	nearest gene
None

[truncated: 3 more sheets: CVvs.GF_colon_FDR<0.0001, CVvs.GF_colon_FDR<0.05, Key_to_Gene_Annotations]
