# Supplementary material for: Microbiota modulate transcription in the intestinal epithelium without remodeling the accessible chromatin landscape
Source: HighWire-hosted journal article supplement (doi:10.1101/gr.165845.113), 2014-06-24
Supplement: Supplemental_TableS8.xlsx [file Supplemental_TableS8.xlsx]

## Sheet: Sheet1
TABLE S8: DHS putatively differential that are within the regulatory domain of genes that are also differentially expressed between GF and CV ileum
chrom	start	stop	gene	Direction DHS	Direction RNA
chr10	95404296	96937133	Btg1	Up in CV	Up in CV
chr10	98726864	99473457	Csl	Up in CV	Up in CV
chr10	115255339	115549973	Ptprr	Up in CV	Up in CV
chr11	29453040	29724668	Rtn4	Up in CV	Up in CV
chr11	101479567	101560265	-	Up in CV	Up in CV
chr16	56205425	56716467	Abi3bp	Up in CV	Up in CV
chr16	78932192	80091342	Tmprss15	Up in CV	Up in CV
chr17	39939939	40025779	-	Up in CV	Up in CV
chr18	3384222	4160829	Bambi	Up in CV	Up in CV
chr2	123436031	124888862	Sema6d	Up in CV	Up in CV
chr3	141650215	142154897	Pdlim5	Up in CV	Up in CV
chr6	128743659	128879398	Clec2i	Up in CV	Up in CV
chr6	146592100	146668451	Gm6654	Up in CV	Up in CV
chr7	46774135	47843887	Gm2058	Up in CV	Up in CV
chrX	21062751	22033721	Slc6a14	Up in CV	Up in CV
