# Supplementary material for: Microbiota modulate transcription in the intestinal epithelium without remodeling the accessible chromatin landscape
Source: HighWire-hosted journal article supplement (doi:10.1101/gr.165845.113), 2014-06-24
Supplement: Supplemental_TableS9.xlsx [file Supplemental_TableS9.xlsx]

## Sheet: up in CV ileum
TABLE S9: Genome coordinates of DHS within the regulatory domain of genes with differential expression between microbiota colonization states (higher expression in CV ileum).
chrom	start	stop	category
chr1	75227855	75229024	CV_up_ileum
chr1	75230381	75230984	CV_up_ileum
chr1	75231104	75231912	CV_up_ileum
chr1	75232491	75234848	CV_up_ileum
chr1	75240237	75243370	CV_up_ileum
chr1	75243376	75245418	CV_up_ileum
chr1	75247109	75249138	CV_up_ileum
chr1	75250288	75251846	CV_up_ileum
chr1	75259385	75261071	CV_up_ileum
chr1	89020659	89023212	CV_up_ileum
chr1	89041351	89054009	CV_up_ileum
chr1	158791420	158792493	CV_up_ileum
chr1	158833847	158834531	CV_up_ileum
chr1	158839402	158839801	CV_up_ileum
chr1	158868456	158871377	CV_up_ileum
chr1	158886035	158887247	CV_up_ileum
chr1	158887463	158888039	CV_up_ileum
chr1	158907856	158909410	CV_up_ileum
chr1	158912885	158913828	CV_up_ileum
chr1	158917627	158918158	CV_up_ileum
chr1	158919815	158921777	CV_up_ileum
chr1	158923922	158925042	CV_up_ileum
chr1	158926578	158927086	CV_up_ileum
chr1	158927567	158928527	CV_up_ileum
chr1	158930745	158931799	CV_up_ileum
chr1	158939216	158940397	CV_up_ileum
chr1	158991971	158992991	CV_up_ileum
chr1	159003343	159004389	CV_up_ileum
chr1	159006005	159007872	CV_up_ileum
chr1	159009336	159010548	CV_up_ileum
chr1	159010733	159012415	CV_up_ileum
chr1	159016068	159017718	CV_up_ileum
chr1	159029970	159032097	CV_up_ileum
chr10	21098344	21098915	CV_up_ileum
chr10	21102477	21103224	CV_up_ileum
chr10	21140268	21141446	CV_up_ileum
chr10	21160439	21161337	CV_up_ileum
chr10	21166057	21166811	CV_up_ileum
chr10	21167625	21169153	CV_up_ileum
chr10	21174364	21175175	CV_up_ileum
chr10	21179678	21180401	CV_up_ileum
chr10	21184347	21186291	CV_up_ileum
chr10	21189639	21190997	CV_up_ileum
chr10	21210282	21211648	CV_up_ileum
chr10	21211900	21212845	CV_up_ileum
chr10	21217641	21218489	CV_up_ileum
chr10	21224190	21224719	CV_up_ileum
chr10	21232274	21232893	CV_up_ileum
chr10	21271210	21272486	CV_up_ileum
chr10	21272689	21274036	CV_up_ileum
chr10	21291161	21292197	CV_up_ileum
chr10	21293238	21294151	CV_up_ileum
chr10	21295432	21296588	CV_up_ileum
chr10	21308255	21308704	CV_up_ileum
chr10	21314571	21315072	CV_up_ileum
chr10	21320165	21321495	CV_up_ileum
chr10	21324233	21325748	CV_up_ileum
chr10	21328956	21330552	CV_up_ileum
chr10	21331678	21334083	CV_up_ileum
chr10	21384378	21385844	CV_up_ileum
chr10	21392388	21393242	CV_up_ileum
chr10	21393481	21394584	CV_up_ileum
chr10	21398227	21399329	CV_up_ileum
chr10	21404468	21406450	CV_up_ileum
chr10	21406913	21408055	CV_up_ileum
chr10	21431608	21433544	CV_up_ileum
chr10	21434661	21435584	CV_up_ileum
chr10	21508886	21510571	CV_up_ileum
chr10	21524323	21525778	CV_up_ileum
chr10	21546370	21547654	CV_up_ileum
chr10	21566942	21568722	CV_up_ileum
chr10	21576342	21577047	CV_up_ileum
chr10	21577153	21578654	CV_up_ileum
chr10	21601653	21604004	CV_up_ileum
chr10	21627528	21628122	CV_up_ileum
chr10	21680855	21681577	CV_up_ileum
chr10	21710957	21717367	CV_up_ileum
chr10	21719764	21721090	CV_up_ileum
chr10	21721295	21722290	CV_up_ileum
chr10	21724421	21725791	CV_up_ileum
chr10	21726726	21727964	CV_up_ileum
chr10	21729845	21730785	CV_up_ileum
chr10	21755751	21756519	CV_up_ileum
chr10	21777660	21779515	CV_up_ileum
chr10	59690682	59692634	CV_up_ileum
chr10	59707433	59708613	CV_up_ileum
chr10	59709190	59709760	CV_up_ileum
chr10	59718314	59720438	CV_up_ileum
chr10	59733591	59735543	CV_up_ileum
chr10	59739747	59745980	CV_up_ileum
chr10	59752671	59754050	CV_up_ileum
chr10	59764437	59769201	CV_up_ileum
chr10	68834121	68834651	CV_up_ileum
chr10	68860777	68863064	CV_up_ileum
chr10	68996175	68997444	CV_up_ileum
chr10	69119021	69119697	CV_up_ileum
chr10	69124701	69125627	CV_up_ileum
chr10	69135171	69136129	CV_up_ileum
chr10	69152725	69154458	CV_up_ileum
chr10	69182579	69183418	CV_up_ileum
chr10	69243989	69244978	CV_up_ileum
chr10	69255646	69256335	CV_up_ileum
chr10	69256431	69257368	CV_up_ileum
chr10	69308225	69309073	CV_up_ileum
chr10	69332973	69333610	CV_up_ileum
chr10	69334691	69336776	CV_up_ileum
chr10	69350657	69351780	CV_up_ileum
chr10	69353150	69353802	CV_up_ileum
chr10	69370961	69371640	CV_up_ileum
chr10	69372835	69373868	CV_up_ileum
chr10	69378753	69380364	CV_up_ileum
chr10	69381746	69382352	CV_up_ileum
chr10	69386004	69390583	CV_up_ileum
chr10	69390983	69391760	CV_up_ileum
chr10	69398886	69401302	CV_up_ileum
chr10	69401819	69402355	CV_up_ileum
chr10	69403514	69404402	CV_up_ileum
chr10	69483588	69484319	CV_up_ileum
chr10	69497497	69498126	CV_up_ileum
chr10	69502315	69503313	CV_up_ileum
chr10	69522283	69524031	CV_up_ileum
chr10	69525087	69525589	CV_up_ileum
chr10	69529462	69530639	CV_up_ileum
chr10	69540822	69541998	CV_up_ileum
chr10	79880558	79885803	CV_up_ileum
chr10	79886028	79887240	CV_up_ileum
chr10	79892346	79899988	CV_up_ileum
chr10	79908378	79909678	CV_up_ileum
chr10	79936690	79939031	CV_up_ileum
chr10	79951693	79962202	CV_up_ileum
chr10	115257818	115258463	CV_up_ileum
chr10	115265751	115266554	CV_up_ileum
chr10	115266709	115267535	CV_up_ileum
chr10	115270566	115272131	CV_up_ileum
chr10	115454612	115456744	CV_up_ileum
chr10	115520961	115521612	CV_up_ileum
chr10	115531338	115532116	CV_up_ileum
chr11	29509842	29510548	CV_up_ileum
chr11	29512192	29515209	CV_up_ileum
chr11	29537963	29538672	CV_up_ileum
chr11	29591997	29594541	CV_up_ileum
chr11	29618397	29618968	CV_up_ileum
chr11	29670615	29672865	CV_up_ileum
chr11	29687322	29687887	CV_up_ileum
chr11	29693090	29694141	CV_up_ileum
chr11	29700791	29702508	CV_up_ileum
chr11	29708142	29709038	CV_up_ileum
chr11	29723846	29726599	CV_up_ileum
chr11	69726186	69728911	CV_up_ileum
chr11	69732846	69736856	CV_up_ileum
chr11	93848614	93849747	CV_up_ileum
chr11	93855711	93859038	CV_up_ileum
chr11	93989142	93989756	CV_up_ileum
chr11	93990767	93991692	CV_up_ileum
chr11	93993155	94000726	CV_up_ileum
chr11	94004497	94005226	CV_up_ileum
chr11	94005902	94007460	CV_up_ileum
chr11	94019531	94023980	CV_up_ileum
chr11	94024146	94025744	CV_up_ileum
chr11	94032769	94034626	CV_up_ileum
chr11	94050594	94051335	CV_up_ileum
chr11	94054189	94055042	CV_up_ileum
chr11	94055537	94056485	CV_up_ileum
chr11	94057535	94058144	CV_up_ileum
chr11	94059369	94060843	CV_up_ileum
chr11	94062927	94064183	CV_up_ileum
chr11	96650018	96651703	CV_up_ileum
chr11	96656610	96657287	CV_up_ileum
chr11	96683617	96686989	CV_up_ileum
chr11	96690071	96692516	CV_up_ileum
chr11	96698375	96699687	CV_up_ileum
chr11	115187604	115188637	CV_up_ileum
chr11	115192476	115198349	CV_up_ileum
chr11	115198387	115199721	CV_up_ileum
chr11	115202548	115203748	CV_up_ileum
chr11	115205375	115210940	CV_up_ileum
chr11	115211081	115213017	CV_up_ileum
chr11	115215057	115217260	CV_up_ileum
chr11	115219409	115221895	CV_up_ileum
chr11	115226481	115229430	CV_up_ileum
chr12	33394694	33395106	CV_up_ileum
chr12	33409158	33409765	CV_up_ileum
chr12	33411425	33412793	CV_up_ileum
chr13	4205228	4206254	CV_up_ileum
chr13	4232368	4233707	CV_up_ileum
chr13	4244212	4244981	CV_up_ileum
chr13	4263594	4264971	CV_up_ileum
chr13	23775452	23776366	CV_up_ileum
chr13	23833784	23834335	CV_up_ileum
chr13	23837265	23837758	CV_up_ileum
chr13	23838129	23838815	CV_up_ileum
chr13	54777008	54778032	CV_up_ileum
chr13	54784836	54790187	CV_up_ileum
chr13	54793020	54796571	CV_up_ileum
chr13	54796862	54798113	CV_up_ileum
chr13	91025560	91026772	CV_up_ileum
chr13	91062148	91063292	CV_up_ileum
chr13	91069413	91069915	CV_up_ileum
chr13	91102380	91103009	CV_up_ileum
chr14	26726533	26727561	CV_up_ileum
chr14	26745252	26748462	CV_up_ileum
chr14	26756329	26757871	CV_up_ileum
chr14	26865959	26867157	CV_up_ileum
chr14	26885061	26887751	CV_up_ileum
chr14	26895760	26897643	CV_up_ileum
chr14	27005637	27006831	CV_up_ileum
chr14	27024978	27027305	CV_up_ileum
chr14	27035717	27037220	CV_up_ileum
chr14	52722528	52724644	CV_up_ileum
chr14	52725862	52727103	CV_up_ileum
chr14	56653035	56653857	CV_up_ileum
chr14	56658476	56659155	CV_up_ileum
chr14	56667840	56668444	CV_up_ileum
chr15	40995078	40996057	CV_up_ileum
chr15	41278392	41280750	CV_up_ileum
chr15	41619666	41622496	CV_up_ileum
chr15	41660817	41661932	CV_up_ileum
chr15	41662059	41662879	CV_up_ileum
chr15	41674981	41675703	CV_up_ileum
chr15	62994605	62995674	CV_up_ileum
chr15	62997899	62998555	CV_up_ileum
chr15	63002363	63003102	CV_up_ileum
chr15	74720770	74724207	CV_up_ileum
chr15	74726574	74728582	CV_up_ileum
chr15	74749657	74750596	CV_up_ileum
chr15	74753682	74754687	CV_up_ileum
chr15	74760653	74762999	CV_up_ileum
chr15	74784468	74787798	CV_up_ileum
chr15	74789486	74792012	CV_up_ileum
chr15	74796891	74799594	CV_up_ileum
chr15	74800473	74802025	CV_up_ileum
chr15	74803540	74805939	CV_up_ileum
chr15	75963337	75964442	CV_up_ileum
chr15	75964977	75968612	CV_up_ileum
chr15	75986157	75987362	CV_up_ileum
chr15	75988178	75989366	CV_up_ileum
chr15	75997961	76019164	CV_up_ileum
chr15	76019561	76021368	CV_up_ileum
chr15	76023047	76031504	CV_up_ileum
chr15	76034057	76040145	CV_up_ileum
chr15	76041367	76042221	CV_up_ileum
chr15	76056360	76057172	CV_up_ileum
chr15	76057247	76057967	CV_up_ileum
chr15	76058755	76064161	CV_up_ileum
chr15	76068874	76070314	CV_up_ileum
chr16	56278462	56279720	CV_up_ileum
chr16	56280888	56282226	CV_up_ileum
chr16	56282466	56283159	CV_up_ileum
chr16	56441206	56442319	CV_up_ileum
chr16	56489177	56489955	CV_up_ileum
chr16	56491284	56492745	CV_up_ileum
chr16	56493645	56494209	CV_up_ileum
chr16	56501192	56502748	CV_up_ileum
chr16	56510503	56511268	CV_up_ileum
chr16	56537988	56538553	CV_up_ileum
chr16	56548870	56549653	CV_up_ileum
chr16	56550403	56551062	CV_up_ileum
chr16	56554223	56555237	CV_up_ileum
chr16	56556789	56557430	CV_up_ileum
chr16	56597991	56599142	CV_up_ileum
chr16	56710070	56710785	CV_up_ileum
chr16	56714863	56718437	CV_up_ileum
chr16	78969463	78969968	CV_up_ileum
chr16	78974079	78974825	CV_up_ileum
chr16	84879205	84879939	CV_up_ileum
chr16	84955494	84956211	CV_up_ileum
chr16	85070226	85070878	CV_up_ileum
chr16	85091906	85093455	CV_up_ileum
chr16	85114801	85115554	CV_up_ileum
chr16	85131266	85131908	CV_up_ileum
chr16	85132141	85135112	CV_up_ileum
chr16	85135961	85136681	CV_up_ileum
chr16	85144070	85145836	CV_up_ileum
chr16	85148767	85149803	CV_up_ileum
chr16	85155425	85156257	CV_up_ileum
chr16	85160255	85161194	CV_up_ileum
chr16	85162935	85163585	CV_up_ileum
chr16	85167952	85168482	CV_up_ileum
chr16	85172169	85174816	CV_up_ileum
chr16	85176487	85178053	CV_up_ileum
chr17	6600387	6601734	CV_up_ileum
chr17	6615085	6616111	CV_up_ileum
chr17	6637596	6639544	CV_up_ileum
chr17	6640511	6640913	CV_up_ileum
chr17	6654687	6655381	CV_up_ileum
chr17	6683938	6684956	CV_up_ileum
chr17	6805960	6806773	CV_up_ileum
chr17	6820137	6821456	CV_up_ileum
chr17	6821876	6823711	CV_up_ileum
chr17	6845242	6846189	CV_up_ileum
chr17	6859618	6860970	CV_up_ileum
chr17	6889076	6890175	CV_up_ileum
chr17	24277387	24279434	CV_up_ileum
chr17	24288319	24290326	CV_up_ileum
chr17	24291192	24292554	CV_up_ileum
chr17	24299402	24301112	CV_up_ileum
chr17	24304542	24307938	CV_up_ileum
chr17	24310309	24310904	CV_up_ileum
chr17	24331906	24333206	CV_up_ileum
chr17	24336249	24339112	CV_up_ileum
chr17	24339423	24350396	CV_up_ileum
chr17	24353679	24354216	CV_up_ileum
chr17	24356383	24358486	CV_up_ileum
chr17	27642117	27652719	CV_up_ileum
chr17	27655813	27658945	CV_up_ileum
chr17	27671558	27672319	CV_up_ileum
chr17	27680224	27681551	CV_up_ileum
chr17	27683369	27685118	CV_up_ileum
chr17	27690402	27695606	CV_up_ileum
chr17	27696173	27696834	CV_up_ileum
chr17	27698744	27704716	CV_up_ileum
chr17	33042113	33043475	CV_up_ileum
chr17	33052525	33054862	CV_up_ileum
chr17	33055620	33057111	CV_up_ileum
chr17	33061286	33062705	CV_up_ileum
chr17	33064506	33065706	CV_up_ileum
chr17	33073461	33074043	CV_up_ileum
chr17	33081286	33082705	CV_up_ileum
chr17	33082965	33085517	CV_up_ileum
chr17	33910197	33910772	CV_up_ileum
chr17	33910939	33913383	CV_up_ileum
chr17	33915207	33920007	CV_up_ileum
chr17	33925430	33926459	CV_up_ileum
chr17	33929208	33929908	CV_up_ileum
chr17	33939141	33939573	CV_up_ileum
chr17	45717801	45719058	CV_up_ileum
chr17	45720986	45723017	CV_up_ileum
chr17	45728137	45734548	CV_up_ileum
chr17	45735086	45737780	CV_up_ileum
chr17	70779026	70780187	CV_up_ileum
chr17	70834922	70835545	CV_up_ileum
chr17	70876301	70877417	CV_up_ileum
chr17	70909685	70911268	CV_up_ileum
chr17	70945750	70946495	CV_up_ileum
chr17	70982535	70983402	CV_up_ileum
chr17	71013129	71014068	CV_up_ileum
chr17	71017787	71019298	CV_up_ileum
chr17	71032719	71033920	CV_up_ileum
chr17	71055821	71057802	CV_up_ileum
chr17	71058565	71059683	CV_up_ileum
chr17	71077827	71078802	CV_up_ileum
chr17	71086603	71088321	CV_up_ileum
chr17	71095651	71096627	CV_up_ileum
chr17	71096750	71098651	CV_up_ileum
chr17	71099926	71101162	CV_up_ileum
chr17	71104206	71106010	CV_up_ileum
chr17	71129869	71131304	CV_up_ileum
chr17	71166656	71168205	CV_up_ileum
chr17	71172462	71173329	CV_up_ileum
chr17	71179146	71180008	CV_up_ileum
chr17	71183558	71184460	CV_up_ileum
chr17	71184506	71185395	CV_up_ileum
chr17	71185788	71186542	CV_up_ileum
chr17	71187852	71188556	CV_up_ileum
chr17	71192255	71193433	CV_up_ileum
chr17	71194125	71195840	CV_up_ileum
chr17	71197544	71199473	CV_up_ileum
chr17	71199596	71203925	CV_up_ileum
chr17	71206101	71207100	CV_up_ileum
chr17	71213905	71216386	CV_up_ileum
chr17	71221416	71223416	CV_up_ileum
chr17	71243588	71245163	CV_up_ileum
chr17	71306889	71307690	CV_up_ileum
chr17	71312820	71313445	CV_up_ileum
chr17	71317204	71319415	CV_up_ileum
chr17	71334708	71338728	CV_up_ileum
chr17	71338764	71340946	CV_up_ileum
chr19	5636148	5639267	CV_up_ileum
chr19	5647590	5650023	CV_up_ileum
chr19	5653753	5656309	CV_up_ileum
chr19	5662366	5668825	CV_up_ileum
chr19	39311065	39311730	CV_up_ileum
chr19	40356357	40357081	CV_up_ileum
chr19	40371006	40373976	CV_up_ileum
chr19	40381453	40383128	CV_up_ileum
chr19	40387770	40388461	CV_up_ileum
chr19	40406214	40406775	CV_up_ileum
chr19	40417425	40418005	CV_up_ileum
chr19	40420135	40420710	CV_up_ileum
chr19	40422787	40424180	CV_up_ileum
chr19	40444270	40446242	CV_up_ileum
chr19	40465900	40468219	CV_up_ileum
chr19	40475612	40476225	CV_up_ileum
chr19	40476604	40477391	CV_up_ileum
chr19	40510853	40512813	CV_up_ileum
chr19	40538083	40539860	CV_up_ileum
chr19	40549590	40553533	CV_up_ileum
chr19	40559218	40560505	CV_up_ileum
chr19	40561611	40563184	CV_up_ileum
chr19	40565209	40566757	CV_up_ileum
chr19	40572732	40575337	CV_up_ileum
chr19	40586203	40588845	CV_up_ileum
chr19	40619123	40620062	CV_up_ileum
chr19	40635943	40636457	CV_up_ileum
chr19	40644871	40645946	CV_up_ileum
chr19	40649211	40650754	CV_up_ileum
chr19	40654993	40656232	CV_up_ileum
chr19	40658569	40660139	CV_up_ileum
chr19	40661251	40664477	CV_up_ileum
chr19	44437730	44438524	CV_up_ileum
chr19	44443808	44445143	CV_up_ileum
chr19	44447330	44447921	CV_up_ileum
chr19	44452178	44453353	CV_up_ileum
chr19	44462049	44465007	CV_up_ileum
chr19	44481624	44483356	CV_up_ileum
chr19	44490106	44494487	CV_up_ileum
chr19	44495665	44498391	CV_up_ileum
chr19	44548409	44549221	CV_up_ileum
chr19	44561628	44562417	CV_up_ileum
chr19	55406840	55407824	CV_up_ileum
chr19	55416013	55418392	CV_up_ileum
chr19	55488493	55488973	CV_up_ileum
chr19	55497898	55499374	CV_up_ileum
chr19	55514778	55515554	CV_up_ileum
chr19	55517959	55518673	CV_up_ileum
chr19	55525588	55526932	CV_up_ileum
chr19	55527097	55527613	CV_up_ileum
chr19	55537391	55538036	CV_up_ileum
chr19	55557748	55560110	CV_up_ileum
chr19	55577443	55579457	CV_up_ileum
chr19	55581450	55582890	CV_up_ileum
chr19	55583240	55584133	CV_up_ileum
chr19	55588294	55589004	CV_up_ileum
chr19	55606816	55607850	CV_up_ileum
chr19	55611930	55612941	CV_up_ileum
chr19	55616447	55617539	CV_up_ileum
chr19	55619621	55620801	CV_up_ileum
chr19	55626140	55629677	CV_up_ileum
chr19	55644062	55645486	CV_up_ileum
chr19	55647756	55649585	CV_up_ileum
chr19	55652547	55654197	CV_up_ileum
chr19	55666067	55668843	CV_up_ileum
chr19	55669257	55671652	CV_up_ileum
chr19	55712068	55714264	CV_up_ileum
chr19	55714381	55715469	CV_up_ileum
chr19	55717486	55719733	CV_up_ileum
chr19	55762853	55764610	CV_up_ileum
chr19	55772709	55773895	CV_up_ileum
chr19	55774401	55777793	CV_up_ileum
chr19	55777963	55780163	CV_up_ileum
chr19	55788241	55790062	CV_up_ileum
chr19	55806851	55808358	CV_up_ileum
chr19	55810483	55810898	CV_up_ileum
chr19	55812374	55813277	CV_up_ileum
chr19	55814942	55820228	CV_up_ileum
chr19	55835207	55837050	CV_up_ileum
chr19	55841426	55842741	CV_up_ileum
chr19	55848686	55850213	CV_up_ileum
chr19	55850991	55851980	CV_up_ileum
chr19	55861324	55863806	CV_up_ileum
chr19	55865980	55868161	CV_up_ileum
chr19	55868331	55870425	CV_up_ileum
chr19	55870659	55873823	CV_up_ileum
chr19	55880630	55882620	CV_up_ileum
chr19	55882713	55883460	CV_up_ileum
chr19	55897359	55898487	CV_up_ileum
chr19	55899247	55900612	CV_up_ileum
chr19	55902070	55902810	CV_up_ileum
chr19	55911674	55914185	CV_up_ileum
chr2	11113855	11115239	CV_up_ileum
chr2	11209539	11210618	CV_up_ileum
chr2	11251000	11251923	CV_up_ileum
chr2	11253065	11254448	CV_up_ileum
chr2	11283150	11284611	CV_up_ileum
chr2	11296598	11297138	CV_up_ileum
chr2	11301902	11302443	CV_up_ileum
chr2	11319898	11321754	CV_up_ileum
chr2	11323529	11324863	CV_up_ileum
chr2	11337606	11338425	CV_up_ileum
chr2	11347067	11347957	CV_up_ileum
chr2	11350991	11352041	CV_up_ileum
chr2	11422059	11426198	CV_up_ileum
chr2	11456233	11458101	CV_up_ileum
chr2	11464162	11465218	CV_up_ileum
chr2	11473517	11476448	CV_up_ileum
chr2	11523512	11525326	CV_up_ileum
chr2	22750165	22752129	CV_up_ileum
chr2	22776094	22776451	CV_up_ileum
chr2	22861697	22862259	CV_up_ileum
chr2	22877131	22877956	CV_up_ileum
chr2	22890290	22890776	CV_up_ileum
chr2	22894357	22896246	CV_up_ileum
chr2	84331591	84332428	CV_up_ileum
chr2	84354816	84355905	CV_up_ileum
chr2	84358890	84360541	CV_up_ileum
chr2	84360940	84361724	CV_up_ileum
chr2	84391644	84392434	CV_up_ileum
chr2	84457968	84458478	CV_up_ileum
chr2	84458776	84459792	CV_up_ileum
chr2	84466709	84467912	CV_up_ileum
chr2	84472908	84473707	CV_up_ileum
chr2	84475693	84477022	CV_up_ileum
chr2	84489596	84490305	CV_up_ileum
chr2	84490473	84491349	CV_up_ileum
chr2	84500336	84500853	CV_up_ileum
chr2	91488577	91491527	CV_up_ileum
chr2	91493545	91497572	CV_up_ileum
chr2	91506397	91509061	CV_up_ileum
chr2	91509295	91512432	CV_up_ileum
chr2	91524023	91524606	CV_up_ileum
chr2	104653263	104653708	CV_up_ileum
chr2	104655585	104658662	CV_up_ileum
chr2	104689058	104690532	CV_up_ileum
chr2	104698745	104699981	CV_up_ileum
chr2	118379644	118380743	CV_up_ileum
chr2	118423238	118425246	CV_up_ileum
chr2	124332721	124334082	CV_up_ileum
chr2	124337580	124338117	CV_up_ileum
chr2	124418223	124419159	CV_up_ileum
chr2	124422148	124422735	CV_up_ileum
chr2	124424712	124425961	CV_up_ileum
chr2	124426954	124428641	CV_up_ileum
chr2	124428923	124429477	CV_up_ileum
chr2	124435304	124437343	CV_up_ileum
chr2	124443536	124445458	CV_up_ileum
chr2	124447640	124448443	CV_up_ileum
chr2	124449362	124450776	CV_up_ileum
chr2	124453315	124454013	CV_up_ileum
chr2	124544677	124546356	CV_up_ileum
chr2	124753974	124754662	CV_up_ileum
chr2	152673147	152674456	CV_up_ileum
chr2	152728927	152734534	CV_up_ileum
chr2	163483802	163485575	CV_up_ileum
chr2	163507759	163509116	CV_up_ileum
chr2	163541626	163543076	CV_up_ileum
chr2	163544064	163547165	CV_up_ileum
chr2	163549551	163557336	CV_up_ileum
chr2	163557423	163563923	CV_up_ileum
chr2	163574101	163577306	CV_up_ileum
chr2	173935079	173941677	CV_up_ileum
chr2	173942018	173943384	CV_up_ileum
chr2	174120550	174122079	CV_up_ileum
chr2	174137573	174138369	CV_up_ileum
chr2	174151813	174157114	CV_up_ileum
chr2	174967031	174967827	CV_up_ileum
chr2	180659692	180662285	CV_up_ileum
chr2	180687062	180690686	CV_up_ileum
chr2	180696273	180699249	CV_up_ileum
chr2	180700600	180703210	CV_up_ileum
chr2	180715082	180717447	CV_up_ileum
chr2	180727077	180732476	CV_up_ileum
chr2	180767047	180780643	CV_up_ileum
chr2	181046832	181049765	CV_up_ileum
chr2	181053289	181055427	CV_up_ileum
chr2	181068689	181069441	CV_up_ileum
chr3	5218195	5220034	CV_up_ileum
chr3	5575225	5577295	CV_up_ileum
chr3	5860189	5861022	CV_up_ileum
chr3	6138802	6139248	CV_up_ileum
chr3	14648432	14649296	CV_up_ileum
chr3	14651943	14652923	CV_up_ileum
chr3	14653242	14654300	CV_up_ileum
chr3	14666757	14667647	CV_up_ileum
chr3	89854862	89857604	CV_up_ileum
chr3	92052182	92052808	CV_up_ileum
chr3	92053394	92055222	CV_up_ileum
chr3	92083560	92086628	CV_up_ileum
chr3	92088228	92089774	CV_up_ileum
chr3	92120418	92120853	CV_up_ileum
chr3	98565976	98567380	CV_up_ileum
chr3	98585745	98588340	CV_up_ileum
chr3	141789295	141789992	CV_up_ileum
chr3	141826760	141828441	CV_up_ileum
chr3	141831523	141832668	CV_up_ileum
chr3	141885315	141885993	CV_up_ileum
chr3	141937318	141937903	CV_up_ileum
chr3	141939421	141940298	CV_up_ileum
chr3	141945659	141946104	CV_up_ileum
chr3	141957836	141958234	CV_up_ileum
chr3	141962405	141962825	CV_up_ileum
chr3	141981018	141981523	CV_up_ileum
chr3	141984698	141985316	CV_up_ileum
chr3	142001793	142003425	CV_up_ileum
chr3	142006075	142006524	CV_up_ileum
chr3	142011547	142012772	CV_up_ileum
chr3	142048652	142049097	CV_up_ileum
chr3	142056802	142059324	CV_up_ileum
chr3	142097492	142098516	CV_up_ileum
chr3	142105914	142106785	CV_up_ileum
chr3	142153139	142154021	CV_up_ileum
chr4	9383517	9383990	CV_up_ileum
chr4	9592712	9593213	CV_up_ileum
chr4	9595423	9597228	CV_up_ileum
chr4	9696843	9698761	CV_up_ileum
chr4	9707206	9708085	CV_up_ileum
chr4	9708342	9709148	CV_up_ileum
chr4	9752124	9753635	CV_up_ileum
chr4	41701542	41703731	CV_up_ileum
chr4	41706296	41709834	CV_up_ileum
chr4	41714013	41714906	CV_up_ileum
chr4	97152999	97153734	CV_up_ileum
chr4	130125071	130127148	CV_up_ileum
chr4	130130167	130131741	CV_up_ileum
chr4	130136768	130140719	CV_up_ileum
chr4	130144155	130147692	CV_up_ileum
chr4	130164953	130165982	CV_up_ileum
chr4	130167026	130168874	CV_up_ileum
chr4	130178697	130180279	CV_up_ileum
chr4	130184861	130185716	CV_up_ileum
chr4	130193495	130194451	CV_up_ileum
chr4	130195971	130196908	CV_up_ileum
chr4	130203372	130203950	CV_up_ileum
chr4	130218668	130220664	CV_up_ileum
chr4	130258395	130259194	CV_up_ileum
chr4	130261981	130263189	CV_up_ileum
chr4	130267024	130267805	CV_up_ileum
chr4	130270616	130272244	CV_up_ileum
chr4	130294436	130294871	CV_up_ileum
chr4	130301761	130302321	CV_up_ileum
chr4	130317391	130318108	CV_up_ileum
chr4	147521721	147524275	CV_up_ileum
chr4	147524422	147527708	CV_up_ileum
chr4	147977613	147979463	CV_up_ileum
chr4	147996489	147996997	CV_up_ileum
chr4	147999820	148001694	CV_up_ileum
chr5	134707806	134711736	CV_up_ileum
chr5	134711775	134715485	CV_up_ileum
chr5	134787424	134793148	CV_up_ileum
chr5	134805643	134806568	CV_up_ileum
chr5	134825875	134827550	CV_up_ileum
chr5	134860500	134862047	CV_up_ileum
chr5	134872510	134874473	CV_up_ileum
chr5	134884539	134887185	CV_up_ileum
chr5	134887395	134888661	CV_up_ileum
chr5	134893471	134896466	CV_up_ileum
chr5	134897707	134898867	CV_up_ileum
chr5	134902155	134903205	CV_up_ileum
chr5	134905361	134907032	CV_up_ileum
chr5	134912394	134915305	CV_up_ileum
chr5	134915882	134916614	CV_up_ileum
chr5	134926358	134926887	CV_up_ileum
chr5	134929951	134933096	CV_up_ileum
chr5	134933310	134934854	CV_up_ileum
chr5	134942045	134943624	CV_up_ileum
chr5	134961145	134962451	CV_up_ileum
chr5	134966051	134968745	CV_up_ileum
chr5	134968962	134970690	CV_up_ileum
chr5	134975700	134976378	CV_up_ileum
chr5	134982826	134984282	CV_up_ileum
chr5	135015584	135018371	CV_up_ileum
chr5	135023355	135025106	CV_up_ileum
chr5	135025326	135026123	CV_up_ileum
chr5	135026350	135028905	CV_up_ileum
chr5	149995155	149997114	CV_up_ileum
chr5	150039953	150042222	CV_up_ileum
chr5	150056071	150060157	CV_up_ileum
chr6	29996837	29999520	CV_up_ileum
chr6	30020639	30021245	CV_up_ileum
chr6	30120883	30126916	CV_up_ileum
chr6	30128102	30129003	CV_up_ileum
chr6	30155450	30156259	CV_up_ileum
chr6	30158646	30159347	CV_up_ileum
chr6	30160365	30163213	CV_up_ileum
chr6	30178306	30179046	CV_up_ileum
chr6	30180940	30182374	CV_up_ileum
chr6	30188017	30188541	CV_up_ileum
chr6	30202082	30203042	CV_up_ileum
chr6	30250228	30251463	CV_up_ileum
chr6	30252821	30255036	CV_up_ileum
chr6	30257049	30259127	CV_up_ileum
chr6	30261780	30262576	CV_up_ileum
chr6	30282161	30282766	CV_up_ileum
chr6	30307359	30308247	CV_up_ileum
chr6	66798248	66799640	CV_up_ileum
chr6	66806320	66806877	CV_up_ileum
chr6	66807768	66808829	CV_up_ileum
chr6	66809022	66809922	CV_up_ileum
chr6	66845020	66848456	CV_up_ileum
chr6	66853078	66854505	CV_up_ileum
chr6	66858367	66859291	CV_up_ileum
chr6	66860228	66861644	CV_up_ileum
chr6	66890626	66891578	CV_up_ileum
chr6	66903745	66904668	CV_up_ileum
chr6	66904881	66905652	CV_up_ileum
chr6	66912001	66913533	CV_up_ileum
chr6	66962783	66965364	CV_up_ileum
chr6	66965761	66967321	CV_up_ileum
chr6	66978763	66980049	CV_up_ileum
chr6	66985878	66987927	CV_up_ileum
chr6	78379960	78380487	CV_up_ileum
chr6	78397023	78397823	CV_up_ileum
chr6	90382995	90385924	CV_up_ileum
chr6	90400133	90401966	CV_up_ileum
chr6	90410865	90414507	CV_up_ileum
chr6	90425084	90428159	CV_up_ileum
chr6	90441810	90443068	CV_up_ileum
chr6	90456528	90460287	CV_up_ileum
chr6	90464250	90465584	CV_up_ileum
chr6	90484451	90485377	CV_up_ileum
chr6	90487264	90488445	CV_up_ileum
chr6	90493830	90495312	CV_up_ileum
chr6	117818079	117818794	CV_up_ileum
chr6	117824515	117825448	CV_up_ileum
chr6	117828835	117830858	CV_up_ileum
chr6	117840890	117842024	CV_up_ileum
chr6	117855223	117859217	CV_up_ileum
chr6	117866025	117868855	CV_up_ileum
chr6	117870726	117872170	CV_up_ileum
chr6	119851815	119853889	CV_up_ileum
chr6	119942837	119943483	CV_up_ileum
chr6	119973683	119974158	CV_up_ileum
chr6	119986667	119990145	CV_up_ileum
chr6	128747539	128750423	CV_up_ileum
chr6	128752150	128753638	CV_up_ileum
chr6	128755070	128755589	CV_up_ileum
chr6	128788068	128790482	CV_up_ileum
chr6	128792364	128794466	CV_up_ileum
chr6	128795206	128795878	CV_up_ileum
chr6	128799747	128800429	CV_up_ileum
chr6	128803782	128806741	CV_up_ileum
chr6	135271771	135274101	CV_up_ileum
chr6	135274761	135277596	CV_up_ileum
chr6	135282093	135283423	CV_up_ileum
chr6	135295542	135296938	CV_up_ileum
chr6	135297443	135298334	CV_up_ileum
chr6	135301445	135302832	CV_up_ileum
chr6	135311863	135315455	CV_up_ileum
chr6	135319407	135320306	CV_up_ileum
chr6	135327129	135328264	CV_up_ileum
chr6	135335068	135336566	CV_up_ileum
chr6	135337988	135339438	CV_up_ileum
chr6	142704725	142706747	CV_up_ileum
chr6	142706965	142709564	CV_up_ileum
chr6	142733763	142734330	CV_up_ileum
chr6	142741848	142743150	CV_up_ileum
chr6	142747078	142748145	CV_up_ileum
chr6	142748286	142749251	CV_up_ileum
chr6	142762201	142763606	CV_up_ileum
chr6	142771632	142772811	CV_up_ileum
chr6	142900521	142902815	CV_up_ileum
chr7	25685979	25690427	CV_up_ileum
chr7	25691550	25693056	CV_up_ileum
chr7	25726244	25741685	CV_up_ileum
chr7	25749974	25750729	CV_up_ileum
chr7	25756046	25758516	CV_up_ileum
chr7	31574742	31578035	CV_up_ileum
chr7	31588765	31590569	CV_up_ileum
chr7	31596431	31598321	CV_up_ileum
chr7	31624062	31627116	CV_up_ileum
chr7	31631488	31633271	CV_up_ileum
chr7	46772445	46774543	CV_up_ileum
chr7	46799079	46800794	CV_up_ileum
chr7	46807364	46808500	CV_up_ileum
chr7	46843723	46844677	CV_up_ileum
chr7	46970732	46972983	CV_up_ileum
chr7	47006303	47007338	CV_up_ileum
chr7	47020370	47021121	CV_up_ileum
chr7	47073112	47074175	CV_up_ileum
chr7	47077609	47079061	CV_up_ileum
chr7	47083712	47084532	CV_up_ileum
chr7	47103452	47103950	CV_up_ileum
chr7	47119545	47120399	CV_up_ileum
chr7	57006495	57006980	CV_up_ileum
chr7	57007656	57009074	CV_up_ileum
chr7	57009939	57010604	CV_up_ileum
chr7	57012897	57015784	CV_up_ileum
chr7	113440479	113440913	CV_up_ileum
chr7	130357403	130359602	CV_up_ileum
chr7	130368243	130369184	CV_up_ileum
chr7	130389983	130390537	CV_up_ileum
chr7	130391147	130392719	CV_up_ileum
chr7	130465813	130466467	CV_up_ileum
chr7	130487323	130489930	CV_up_ileum
chr7	130497085	130498520	CV_up_ileum
chr7	130509265	130512271	CV_up_ileum
chr7	130512396	130514842	CV_up_ileum
chr8	22866494	22868594	CV_up_ileum
chr8	23499871	23502502	CV_up_ileum
chr8	23504697	23505789	CV_up_ileum
chr8	23508222	23510199	CV_up_ileum
chr8	23521115	23522890	CV_up_ileum
chr8	23524329	23525262	CV_up_ileum
chr8	23530931	23531459	CV_up_ileum
chr8	23532315	23533157	CV_up_ileum
chr8	23537143	23537822	CV_up_ileum
chr8	23543018	23544313	CV_up_ileum
chr8	23544568	23545702	CV_up_ileum
chr8	23553339	23554126	CV_up_ileum
chr8	96675987	96678274	CV_up_ileum
chr8	96690703	96691822	CV_up_ileum
chr8	96695159	96697985	CV_up_ileum
chr9	59563422	59564926	CV_up_ileum
chr9	59570741	59572076	CV_up_ileum
chr9	59597399	59600099	CV_up_ileum
chr9	78038214	78040915	CV_up_ileum
chr9	78041525	78042197	CV_up_ileum
chr9	78044220	78044675	CV_up_ileum
chr9	78051843	78052973	CV_up_ileum
chr9	78064528	78065512	CV_up_ileum
chr9	78072063	78072706	CV_up_ileum
chr9	78076391	78079141	CV_up_ileum
chr9	78080974	78081910	CV_up_ileum
chr9	78102969	78105592	CV_up_ileum
chr9	78107430	78108416	CV_up_ileum
chr9	78129207	78130740	CV_up_ileum
chr9	78136840	78138345	CV_up_ileum
chr9	78143800	78144747	CV_up_ileum
chr9	78146829	78147603	CV_up_ileum
chr9	78187632	78188619	CV_up_ileum
chr9	78191622	78192517	CV_up_ileum
chr9	78194344	78195278	CV_up_ileum
chr9	78195839	78197023	CV_up_ileum
chr9	78205623	78206423	CV_up_ileum
chr9	107257288	107259094	CV_up_ileum
chr9	107259273	107261632	CV_up_ileum
chr9	107268030	107271327	CV_up_ileum
chr9	107275615	107279217	CV_up_ileum
chr9	107279927	107281567	CV_up_ileum
chr9	107287494	107293829	CV_up_ileum
chr9	107298128	107306412	CV_up_ileum
chr9	107362678	107374510	CV_up_ileum
chr9	107381115	107385809	CV_up_ileum
chr9	107385887	107398654	CV_up_ileum
chr9	107411341	107417931	CV_up_ileum
chr9	107422967	107431106	CV_up_ileum
chr9	108380807	108383948	CV_up_ileum
chr9	108391201	108396360	CV_up_ileum
chrX	11040949	11041494	CV_up_ileum
chrX	11047216	11047912	CV_up_ileum
chrX	11105566	11106660	CV_up_ileum
chrX	11118043	11118609	CV_up_ileum
chrX	11176104	11177055	CV_up_ileum
chrX	11221594	11222072	CV_up_ileum
chrX	11224292	11225099	CV_up_ileum
chrX	11226235	11226719	CV_up_ileum
chrX	11234554	11235395	CV_up_ileum
chrX	11241277	11243141	CV_up_ileum
chrX	11243413	11244113	CV_up_ileum
chrX	11245827	11247087	CV_up_ileum
chrX	11311564	11313980	CV_up_ileum
chrX	11375157	11375951	CV_up_ileum
chrX	11383523	11385936	CV_up_ileum
chrX	11463175	11465634	CV_up_ileum
chrX	11470168	11471703	CV_up_ileum
chrX	11484131	11485032	CV_up_ileum
chrX	11501561	11502658	CV_up_ileum
chrX	11520333	11521109	CV_up_ileum
chrX	11575452	11576820	CV_up_ileum
chrX	11581909	11584897	CV_up_ileum
chrX	11620018	11621273	CV_up_ileum
chrX	11653739	11654976	CV_up_ileum
chrX	11655631	11658614	CV_up_ileum
chrX	11663905	11666254	CV_up_ileum
chrX	11666530	11669397	CV_up_ileum
chrX	11673623	11674839	CV_up_ileum
chrX	11703965	11706926	CV_up_ileum
chrX	11709692	11715188	CV_up_ileum
chrX	11735258	11737866	CV_up_ileum
chrX	11754689	11755399	CV_up_ileum
chrX	11828730	11830588	CV_up_ileum
chrX	11863550	11864853	CV_up_ileum
chrX	11879235	11879920	CV_up_ileum
chrX	11899466	11900139	CV_up_ileum
chrX	11904543	11905007	CV_up_ileum
chrX	11909263	11909919	CV_up_ileum
chrX	11921903	11922602	CV_up_ileum
chrX	11925131	11925782	CV_up_ileum
chrX	11952766	11954436	CV_up_ileum
chrX	11968182	11968947	CV_up_ileum
chrX	11985747	11987136	CV_up_ileum
chrX	12002018	12003182	CV_up_ileum
chrX	12117738	12118637	CV_up_ileum
chrX	12120166	12121224	CV_up_ileum
chrX	121264070	121264483	CV_up_ileum
chrX	121291168	121292499	CV_up_ileum
chrX	121297279	121297751	CV_up_ileum
chrX	121298273	121298875	CV_up_ileum
chrX	121298998	121300266	CV_up_ileum
chrX	121300672	121301719	CV_up_ileum
chrX	121302010	121303995	CV_up_ileum
chrX	121304219	121305085	CV_up_ileum
chrX	121305772	121309895	CV_up_ileum
chrX	121310213	121314293	CV_up_ileum
chrX	121314349	121315262	CV_up_ileum
chrX	121315410	121315886	CV_up_ileum
chrX	121316433	121319426	CV_up_ileum
chrX	131252184	131253462	CV_up_ileum
chrX	133242215	133243691	CV_up_ileum
chrX	133275485	133277093	CV_up_ileum
chrX	133277166	133277781	CV_up_ileum
chrX	138739000	138740406	CV_up_ileum

## Sheet: up in CR ileum
TABLE S9: Genome coordinates of DHS within the regulatory domain of genes with differential expression between microbiota colonization states (higher expression in CR ileum).
chrom	start	stop	category
chr1	40435344	40436203	CR_up_ileum
chr1	40445453	40445980	CR_up_ileum
chr1	40475272	40475772	CR_up_ileum
chr1	40480610	40481351	CR_up_ileum
chr1	71698771	71700985	CR_up_ileum
chr1	71883474	71885032	CR_up_ileum
chr1	72170025	72170795	CR_up_ileum
chr1	72188358	72189046	CR_up_ileum
chr1	72218331	72221759	CR_up_ileum
chr1	72229007	72230755	CR_up_ileum
chr1	72232299	72233670	CR_up_ileum
chr1	72241686	72245064	CR_up_ileum
chr1	72256720	72259250	CR_up_ileum
chr1	121908820	121910364	CR_up_ileum
chr1	121912738	121913372	CR_up_ileum
chr1	121923773	121926660	CR_up_ileum
chr1	121926786	121927830	CR_up_ileum
chr1	121928995	121930299	CR_up_ileum
chr1	121933508	121935028	CR_up_ileum
chr1	121965968	121967443	CR_up_ileum
chr1	121968548	121972622	CR_up_ileum
chr1	121977136	121977671	CR_up_ileum
chr1	121978429	121981446	CR_up_ileum
chr1	121981929	121982901	CR_up_ileum
chr1	121986945	121988657	CR_up_ileum
chr1	121989565	121990577	CR_up_ileum
chr1	121996535	121998238	CR_up_ileum
chr1	122001918	122002667	CR_up_ileum
chr1	122011675	122013458	CR_up_ileum
chr1	127456374	127458788	CR_up_ileum
chr1	127503517	127504621	CR_up_ileum
chr1	127544444	127545040	CR_up_ileum
chr1	127558337	127560206	CR_up_ileum
chr1	127572542	127575453	CR_up_ileum
chr1	127589940	127591680	CR_up_ileum
chr1	127597184	127598887	CR_up_ileum
chr1	127617586	127618769	CR_up_ileum
chr1	127685916	127687016	CR_up_ileum
chr1	127704893	127705536	CR_up_ileum
chr1	127806976	127810128	CR_up_ileum
chr1	130139988	130142158	CR_up_ileum
chr1	130210671	130212069	CR_up_ileum
chr1	130219696	130220581	CR_up_ileum
chr1	130251666	130252825	CR_up_ileum
chr1	130254921	130257183	CR_up_ileum
chr1	177810311	177812434	CR_up_ileum
chr1	177853827	177854398	CR_up_ileum
chr1	177866318	177867391	CR_up_ileum
chr1	178204241	178206101	CR_up_ileum
chr1	187254969	187256797	CR_up_ileum
chr1	187272125	187274522	CR_up_ileum
chr1	187277955	187280748	CR_up_ileum
chr1	187293008	187294440	CR_up_ileum
chr1	187321650	187322730	CR_up_ileum
chr1	187325806	187326981	CR_up_ileum
chr1	187332678	187333576	CR_up_ileum
chr1	187339312	187341844	CR_up_ileum
chr1	187434361	187435869	CR_up_ileum
chr1	187437968	187438910	CR_up_ileum
chr1	187439605	187441048	CR_up_ileum
chr1	187505656	187506864	CR_up_ileum
chr1	187598286	187599710	CR_up_ileum
chr1	187647977	187648451	CR_up_ileum
chr1	187940026	187941637	CR_up_ileum
chr10	95433059	95434105	CR_up_ileum
chr10	95496127	95496680	CR_up_ileum
chr10	95511154	95511638	CR_up_ileum
chr10	95537637	95538721	CR_up_ileum
chr10	95539950	95540695	CR_up_ileum
chr10	95543061	95544018	CR_up_ileum
chr10	95551874	95552896	CR_up_ileum
chr10	95559282	95559881	CR_up_ileum
chr10	95569752	95570940	CR_up_ileum
chr10	95643491	95644916	CR_up_ileum
chr10	95663271	95664995	CR_up_ileum
chr10	95676092	95677279	CR_up_ileum
chr10	95692821	95693674	CR_up_ileum
chr10	95695137	95696029	CR_up_ileum
chr10	95792969	95793850	CR_up_ileum
chr10	95857451	95858456	CR_up_ileum
chr10	95862848	95864031	CR_up_ileum
chr10	95867090	95868260	CR_up_ileum
chr10	95882192	95882958	CR_up_ileum
chr10	95900572	95902055	CR_up_ileum
chr10	95902479	95903114	CR_up_ileum
chr10	95977178	95979292	CR_up_ileum
chr10	95990102	95991520	CR_up_ileum
chr10	95996996	95997959	CR_up_ileum
chr10	96037031	96038309	CR_up_ileum
chr10	96078747	96081399	CR_up_ileum
chr10	96086656	96088601	CR_up_ileum
chr10	96090625	96091701	CR_up_ileum
chr10	96115537	96116384	CR_up_ileum
chr10	96116536	96117565	CR_up_ileum
chr10	96124209	96124709	CR_up_ileum
chr10	96125464	96126820	CR_up_ileum
chr10	96148361	96150148	CR_up_ileum
chr10	96152532	96154802	CR_up_ileum
chr10	96156409	96158249	CR_up_ileum
chr10	96184658	96185951	CR_up_ileum
chr10	96186966	96188166	CR_up_ileum
chr10	96213274	96213978	CR_up_ileum
chr10	96214063	96214882	CR_up_ileum
chr10	96417758	96418847	CR_up_ileum
chr10	96443660	96444775	CR_up_ileum
chr10	96500340	96501516	CR_up_ileum
chr10	96542012	96542778	CR_up_ileum
chr10	96620711	96622487	CR_up_ileum
chr10	96622869	96623353	CR_up_ileum
chr10	96682714	96683629	CR_up_ileum
chr10	96774631	96776780	CR_up_ileum
chr10	96802435	96803544	CR_up_ileum
chr10	96807944	96808436	CR_up_ileum
chr10	96838436	96838894	CR_up_ileum
chr10	98573727	98574446	CR_up_ileum
chr10	98576624	98577708	CR_up_ileum
chr10	98579850	98582013	CR_up_ileum
chr10	98588941	98590958	CR_up_ileum
chr10	98594760	98596260	CR_up_ileum
chr10	98598697	98599673	CR_up_ileum
chr10	98627523	98628990	CR_up_ileum
chr10	98651694	98652255	CR_up_ileum
chr10	98656835	98657800	CR_up_ileum
chr10	98664457	98665507	CR_up_ileum
chr10	98666312	98667615	CR_up_ileum
chr10	98673625	98674885	CR_up_ileum
chr10	98684407	98685868	CR_up_ileum
chr10	98688997	98690160	CR_up_ileum
chr10	98699908	98700626	CR_up_ileum
chr10	98706010	98708058	CR_up_ileum
chr10	98709200	98710669	CR_up_ileum
chr10	98715945	98716541	CR_up_ileum
chr10	98723667	98728301	CR_up_ileum
chr10	98732923	98734344	CR_up_ileum
chr10	98755627	98756188	CR_up_ileum
chr10	98760331	98762173	CR_up_ileum
chr10	98815730	98817521	CR_up_ileum
chr10	98841551	98842257	CR_up_ileum
chr10	98922267	98923230	CR_up_ileum
chr10	98923437	98924654	CR_up_ileum
chr10	98974233	98974969	CR_up_ileum
chr10	99036411	99037200	CR_up_ileum
chr10	99039795	99040382	CR_up_ileum
chr10	99061922	99062372	CR_up_ileum
chr10	99078338	99078890	CR_up_ileum
chr10	99081964	99082816	CR_up_ileum
chr10	99094831	99095535	CR_up_ileum
chr10	99104347	99105551	CR_up_ileum
chr10	99161081	99161609	CR_up_ileum
chr10	99188036	99188903	CR_up_ileum
chr10	99274045	99274836	CR_up_ileum
chr10	99306503	99307452	CR_up_ileum
chr10	99354244	99355113	CR_up_ileum
chr10	99356460	99357072	CR_up_ileum
chr10	99358392	99358942	CR_up_ileum
chr10	99364928	99365777	CR_up_ileum
chr10	99379366	99380179	CR_up_ileum
chr10	99380467	99382133	CR_up_ileum
chr10	99443144	99444986	CR_up_ileum
chr10	99459924	99460407	CR_up_ileum
chr10	99464041	99464536	CR_up_ileum
chr10	99472654	99473680	CR_up_ileum
chr10	115257818	115258463	CR_up_ileum
chr10	115265751	115266554	CR_up_ileum
chr10	115266709	115267535	CR_up_ileum
chr10	115270566	115272131	CR_up_ileum
chr10	115454612	115456744	CR_up_ileum
chr10	115520961	115521612	CR_up_ileum
chr10	115531338	115532116	CR_up_ileum
chr10	126413686	126426367	CR_up_ileum
chr10	126426940	126429940	CR_up_ileum
chr10	126434656	126442114	CR_up_ileum
chr11	26701741	26703091	CR_up_ileum
chr11	68210658	68214912	CR_up_ileum
chr11	68221041	68222116	CR_up_ileum
chr11	68244643	68246787	CR_up_ileum
chr11	68297810	68300285	CR_up_ileum
chr11	68305273	68311288	CR_up_ileum
chr11	95612232	95612942	CR_up_ileum
chr11	95629270	95630047	CR_up_ileum
chr11	95631815	95633420	CR_up_ileum
chr11	95637889	95640804	CR_up_ileum
chr11	95649924	95651949	CR_up_ileum
chr11	95656914	95658968	CR_up_ileum
chr11	95661236	95662500	CR_up_ileum
chr11	95666062	95667526	CR_up_ileum
chr11	95680493	95681133	CR_up_ileum
chr11	95682639	95683398	CR_up_ileum
chr11	95684241	95686707	CR_up_ileum
chr11	95687869	95693007	CR_up_ileum
chr11	95693509	95700833	CR_up_ileum
chr11	100478933	100481773	CR_up_ileum
chr11	100483900	100484957	CR_up_ileum
chr11	100484995	100485869	CR_up_ileum
chr11	100487415	100489218	CR_up_ileum
chr11	100500897	100502970	CR_up_ileum
chr11	101486067	101486975	CR_up_ileum
chr11	101487850	101490241	CR_up_ileum
chr11	101502221	101503980	CR_up_ileum
chr11	101506425	101507950	CR_up_ileum
chr11	101518575	101520736	CR_up_ileum
chr11	101524602	101525331	CR_up_ileum
chr11	101526315	101527513	CR_up_ileum
chr11	101529109	101531264	CR_up_ileum
chr11	101534164	101535359	CR_up_ileum
chr11	101536091	101537222	CR_up_ileum
chr12	3499605	3500884	CR_up_ileum
chr12	4775233	4776518	CR_up_ileum
chr12	4823252	4825103	CR_up_ileum
chr12	14155631	14159718	CR_up_ileum
chr12	14193362	14194075	CR_up_ileum
chr12	71210881	71213676	CR_up_ileum
chr12	71217762	71218954	CR_up_ileum
chr12	71248962	71250510	CR_up_ileum
chr12	71327516	71329583	CR_up_ileum
chr12	71335127	71336647	CR_up_ileum
chr12	71446720	71449425	CR_up_ileum
chr12	76716420	76717733	CR_up_ileum
chr12	76757533	76757995	CR_up_ileum
chr12	76764515	76765337	CR_up_ileum
chr12	76769846	76771817	CR_up_ileum
chr12	76772575	76773294	CR_up_ileum
chr12	76779322	76779813	CR_up_ileum
chr12	76784254	76785038	CR_up_ileum
chr12	76799079	76799468	CR_up_ileum
chr12	76807371	76808379	CR_up_ileum
chr12	76810416	76811306	CR_up_ileum
chr12	76835169	76837167	CR_up_ileum
chr12	103762651	103763954	CR_up_ileum
chr12	103783574	103785437	CR_up_ileum
chr12	103788389	103790503	CR_up_ileum
chr12	103792122	103794602	CR_up_ileum
chr12	103798942	103805655	CR_up_ileum
chr12	103814559	103826892	CR_up_ileum
chr12	103827879	103836419	CR_up_ileum
chr12	103837487	103842340	CR_up_ileum
chr12	103842527	103845589	CR_up_ileum
chr12	103854177	103855906	CR_up_ileum
chr12	103856324	103857504	CR_up_ileum
chr12	103857865	103859044	CR_up_ileum
chr12	103859427	103865601	CR_up_ileum
chr12	103868558	103873154	CR_up_ileum
chr12	103876148	103883106	CR_up_ileum
chr12	103883259	103888104	CR_up_ileum
chr12	103903329	103906244	CR_up_ileum
chr12	103911273	103914196	CR_up_ileum
chr12	103915282	103925511	CR_up_ileum
chr12	103927980	103928838	CR_up_ileum
chr12	103928933	103931955	CR_up_ileum
chr12	103933335	103936952	CR_up_ileum
chr12	103937123	103938972	CR_up_ileum
chr12	103939754	103944070	CR_up_ileum
chr13	34446714	34447244	CR_up_ileum
chr13	34489685	34491262	CR_up_ileum
chr13	34497597	34498745	CR_up_ileum
chr13	34499871	34500866	CR_up_ileum
chr13	34534816	34535386	CR_up_ileum
chr13	34537774	34539382	CR_up_ileum
chr13	34552664	34553442	CR_up_ileum
chr13	34554489	34555089	CR_up_ileum
chr13	34555711	34556873	CR_up_ileum
chr13	34569088	34570318	CR_up_ileum
chr13	34727674	34728461	CR_up_ileum
chr13	34734699	34735866	CR_up_ileum
chr13	34741925	34745645	CR_up_ileum
chr13	34746728	34747766	CR_up_ileum
chr13	34751207	34752041	CR_up_ileum
chr13	34788769	34789692	CR_up_ileum
chr13	34817585	34818831	CR_up_ileum
chr13	91362728	91364348	CR_up_ileum
chr13	91390365	91391118	CR_up_ileum
chr14	51404061	51405721	CR_up_ileum
chr14	51419405	51419960	CR_up_ileum
chr14	51426867	51428164	CR_up_ileum
chr14	51432044	51433351	CR_up_ileum
chr14	51460208	51466759	CR_up_ileum
chr14	56658476	56659155	CR_up_ileum
chr14	56667840	56668444	CR_up_ileum
chr14	63825630	63826774	CR_up_ileum
chr14	63849747	63852237	CR_up_ileum
chr14	63855756	63856585	CR_up_ileum
chr14	63862654	63868026	CR_up_ileum
chr14	63874279	63875928	CR_up_ileum
chr14	63879528	63882158	CR_up_ileum
chr14	63900527	63901219	CR_up_ileum
chr14	63905568	63907276	CR_up_ileum
chr14	63921610	63922889	CR_up_ileum
chr14	63927549	63928581	CR_up_ileum
chr14	63930721	63931338	CR_up_ileum
chr14	63944021	63946409	CR_up_ileum
chr14	63948042	63948862	CR_up_ileum
chr14	63953999	63955293	CR_up_ileum
chr14	63960757	63963644	CR_up_ileum
chr14	63965429	63968179	CR_up_ileum
chr14	63986544	63993360	CR_up_ileum
chr14	63996125	64004327	CR_up_ileum
chr14	90298003	90299199	CR_up_ileum
chr14	102412187	102412989	CR_up_ileum
chr14	102413691	102414902	CR_up_ileum
chr14	102909585	102910046	CR_up_ileum
chr14	102951692	102952256	CR_up_ileum
chr14	103350950	103351636	CR_up_ileum
chr14	103379631	103382838	CR_up_ileum
chr14	103394112	103394907	CR_up_ileum
chr14	103411689	103412645	CR_up_ileum
chr15	62733616	62735169	CR_up_ileum
chr15	62994605	62995674	CR_up_ileum
chr15	62997899	62998555	CR_up_ileum
chr15	63002363	63003102	CR_up_ileum
chr15	63021395	63022100	CR_up_ileum
chr15	63025369	63026598	CR_up_ileum
chr15	63541668	63542497	CR_up_ileum
chr15	63553014	63553820	CR_up_ileum
chr15	63571791	63572687	CR_up_ileum
chr15	63602656	63603878	CR_up_ileum
chr15	63651465	63653387	CR_up_ileum
chr15	63653563	63654260	CR_up_ileum
chr15	74647026	74648516	CR_up_ileum
chr15	74649355	74652646	CR_up_ileum
chr15	74702327	74704518	CR_up_ileum
chr15	74705925	74707404	CR_up_ileum
chr15	74711733	74712462	CR_up_ileum
chr15	74713039	74714117	CR_up_ileum
chr15	74714437	74715656	CR_up_ileum
chr15	74720770	74724207	CR_up_ileum
chr15	74726574	74728582	CR_up_ileum
chr15	74749657	74750596	CR_up_ileum
chr15	74753682	74754687	CR_up_ileum
chr15	74760653	74762999	CR_up_ileum
chr15	75932676	75937693	CR_up_ileum
chr15	75943818	75950772	CR_up_ileum
chr15	75954312	75956044	CR_up_ileum
chr15	78377390	78381201	CR_up_ileum
chr15	78409720	78412884	CR_up_ileum
chr15	78416778	78418458	CR_up_ileum
chr15	78418986	78420355	CR_up_ileum
chr15	98783069	98784963	CR_up_ileum
chr15	98812177	98813371	CR_up_ileum
chr15	98815011	98816690	CR_up_ileum
chr15	98822444	98824902	CR_up_ileum
chr15	98828371	98829366	CR_up_ileum
chr15	98839149	98839660	CR_up_ileum
chr16	10545056	10547369	CR_up_ileum
chr16	10557397	10558572	CR_up_ileum
chr16	10564695	10566299	CR_up_ileum
chr16	10571707	10572532	CR_up_ileum
chr16	10580616	10582233	CR_up_ileum
chr16	10628967	10630464	CR_up_ileum
chr16	10639872	10640742	CR_up_ileum
chr16	10642189	10645163	CR_up_ileum
chr16	10655018	10657688	CR_up_ileum
chr16	10659672	10661265	CR_up_ileum
chr16	10663567	10665190	CR_up_ileum
chr16	10673935	10674786	CR_up_ileum
chr16	10675554	10678027	CR_up_ileum
chr16	10689695	10692022	CR_up_ileum
chr16	10693585	10695589	CR_up_ileum
chr16	10697390	10699243	CR_up_ileum
chr16	10701418	10703543	CR_up_ileum
chr16	10731718	10734281	CR_up_ileum
chr16	10741000	10742085	CR_up_ileum
chr16	10748962	10751340	CR_up_ileum
chr16	10752981	10756306	CR_up_ileum
chr16	10767219	10767932	CR_up_ileum
chr16	10768113	10771648	CR_up_ileum
chr16	10774627	10775354	CR_up_ileum
chr16	10781765	10787758	CR_up_ileum
chr16	42955504	42956034	CR_up_ileum
chr17	34253131	34260040	CR_up_ileum
chr17	34263620	34265097	CR_up_ileum
chr17	34271191	34271866	CR_up_ileum
chr17	34271948	34273183	CR_up_ileum
chr17	34274325	34277485	CR_up_ileum
chr17	34289104	34291453	CR_up_ileum
chr17	34306176	34306678	CR_up_ileum
chr17	34322593	34325601	CR_up_ileum
chr17	34333977	34336746	CR_up_ileum
chr17	34394477	34395329	CR_up_ileum
chr17	34398089	34399138	CR_up_ileum
chr17	34399810	34402682	CR_up_ileum
chr17	34422484	34423325	CR_up_ileum
chr17	34424451	34425263	CR_up_ileum
chr17	34428438	34429004	CR_up_ileum
chr17	34429236	34429902	CR_up_ileum
chr17	34432596	34434040	CR_up_ileum
chr17	34437294	34438654	CR_up_ileum
chr17	34441682	34442124	CR_up_ileum
chr17	34442460	34443762	CR_up_ileum
chr17	34446158	34447239	CR_up_ileum
chr17	34450299	34450844	CR_up_ileum
chr17	36330180	36331049	CR_up_ileum
chr17	36342076	36343576	CR_up_ileum
chr17	36367937	36369004	CR_up_ileum
chr17	36374156	36374980	CR_up_ileum
chr17	36385551	36386350	CR_up_ileum
chr17	36389045	36389662	CR_up_ileum
chr17	36393686	36396142	CR_up_ileum
chr17	36402785	36403233	CR_up_ileum
chr17	36407454	36409889	CR_up_ileum
chr17	37327543	37328091	CR_up_ileum
chr17	37333712	37334714	CR_up_ileum
chr17	73456591	73459000	CR_up_ileum
chr17	73461410	73463211	CR_up_ileum
chr17	73488841	73489333	CR_up_ileum
chr17	73491493	73492472	CR_up_ileum
chr17	73542293	73543070	CR_up_ileum
chr17	73600074	73601495	CR_up_ileum
chr17	73607186	73608601	CR_up_ileum
chr17	73612220	73612948	CR_up_ileum
chr17	73631566	73632661	CR_up_ileum
chr17	73646112	73646844	CR_up_ileum
chr17	73650485	73653450	CR_up_ileum
chr17	73654123	73655625	CR_up_ileum
chr17	73692095	73694642	CR_up_ileum
chr17	73709614	73711840	CR_up_ileum
chr17	73716187	73717814	CR_up_ileum
chr17	73726426	73727975	CR_up_ileum
chr17	73734535	73736398	CR_up_ileum
chr17	73748202	73749422	CR_up_ileum
chr17	73780975	73782780	CR_up_ileum
chr17	73805334	73805994	CR_up_ileum
chr17	73837156	73837660	CR_up_ileum
chr17	73903707	73905061	CR_up_ileum
chr17	73921246	73923006	CR_up_ileum
chr17	73988574	73989936	CR_up_ileum
chr17	74058327	74061693	CR_up_ileum
chr17	79280411	79282576	CR_up_ileum
chr18	36941808	36943698	CR_up_ileum
chr18	36952851	36954211	CR_up_ileum
chr18	36960225	36962437	CR_up_ileum
chr18	60933681	60936276	CR_up_ileum
chr18	60946596	60947315	CR_up_ileum
chr18	60962726	60966894	CR_up_ileum
chr18	61003388	61004783	CR_up_ileum
chr18	61007330	61009629	CR_up_ileum
chr19	39004623	39006657	CR_up_ileum
chr19	39072706	39073738	CR_up_ileum
chr19	39079244	39080350	CR_up_ileum
chr19	39081061	39081755	CR_up_ileum
chr19	61251436	61252125	CR_up_ileum
chr19	61274275	61276140	CR_up_ileum
chr19	61283083	61283871	CR_up_ileum
chr19	61299543	61304682	CR_up_ileum
chr2	32090452	32093590	CR_up_ileum
chr2	32113260	32117312	CR_up_ileum
chr2	32137988	32138715	CR_up_ileum
chr2	32142751	32145547	CR_up_ileum
chr2	32150700	32152739	CR_up_ileum
chr2	32159779	32160988	CR_up_ileum
chr2	32161139	32169159	CR_up_ileum
chr2	163483802	163485575	CR_up_ileum
chr2	163507759	163509116	CR_up_ileum
chr2	163541626	163543076	CR_up_ileum
chr2	163544064	163547165	CR_up_ileum
chr2	163549551	163557336	CR_up_ileum
chr2	163557423	163563923	CR_up_ileum
chr2	163574101	163577306	CR_up_ileum
chr2	163585690	163586935	CR_up_ileum
chr2	163611294	163611742	CR_up_ileum
chr2	163612537	163614767	CR_up_ileum
chr2	173053300	173060672	CR_up_ileum
chr2	173068158	173070229	CR_up_ileum
chr2	173078296	173085764	CR_up_ileum
chr2	173086171	173094338	CR_up_ileum
chr2	173099104	173103429	CR_up_ileum
chr2	173103877	173107822	CR_up_ileum
chr2	173131903	173133815	CR_up_ileum
chr2	173146207	173148344	CR_up_ileum
chr2	173182148	173183446	CR_up_ileum
chr2	173206880	173208862	CR_up_ileum
chr2	173266774	173270631	CR_up_ileum
chr2	173279115	173279639	CR_up_ileum
chr3	37538263	37540403	CR_up_ileum
chr3	37541405	37542660	CR_up_ileum
chr3	37548000	37548726	CR_up_ileum
chr3	37555135	37556530	CR_up_ileum
chr3	37564721	37566273	CR_up_ileum
chr3	37570999	37572141	CR_up_ileum
chr3	37572419	37574707	CR_up_ileum
chr3	37584753	37587278	CR_up_ileum
chr3	37603569	37604798	CR_up_ileum
chr3	37605030	37605851	CR_up_ileum
chr3	37621306	37624810	CR_up_ileum
chr3	37626405	37628868	CR_up_ileum
chr3	37645869	37647941	CR_up_ileum
chr3	37656827	37658188	CR_up_ileum
chr3	37659397	37660491	CR_up_ileum
chr3	37661114	37661984	CR_up_ileum
chr3	37687511	37689133	CR_up_ileum
chr3	37758742	37759540	CR_up_ileum
chr3	37769258	37769836	CR_up_ileum
chr3	37805675	37807813	CR_up_ileum
chr3	37834760	37835928	CR_up_ileum
chr3	37857344	37857990	CR_up_ileum
chr3	37860981	37862626	CR_up_ileum
chr3	37877326	37877789	CR_up_ileum
chr3	38100878	38101742	CR_up_ileum
chr3	38119572	38121099	CR_up_ileum
chr3	38126003	38127562	CR_up_ileum
chr3	38154487	38155110	CR_up_ileum
chr3	98027785	98028983	CR_up_ileum
chr3	98030691	98032090	CR_up_ileum
chr3	98052668	98054335	CR_up_ileum
chr3	98057192	98058521	CR_up_ileum
chr3	98070755	98072508	CR_up_ileum
chr3	98082576	98085574	CR_up_ileum
chr3	98116526	98118235	CR_up_ileum
chr3	98141503	98144169	CR_up_ileum
chr4	43489489	43490275	CR_up_ileum
chr4	43490890	43491700	CR_up_ileum
chr4	43492991	43494381	CR_up_ileum
chr4	43503123	43504281	CR_up_ileum
chr4	43505121	43507440	CR_up_ileum
chr4	43510712	43513192	CR_up_ileum
chr4	43515426	43517305	CR_up_ileum
chr4	43518847	43523310	CR_up_ileum
chr4	43527373	43529548	CR_up_ileum
chr4	43531261	43533379	CR_up_ileum
chr4	43534850	43537952	CR_up_ileum
chr4	43541746	43542269	CR_up_ileum
chr4	43542850	43544863	CR_up_ileum
chr4	44094786	44095768	CR_up_ileum
chr4	44096606	44098069	CR_up_ileum
chr4	44116243	44118058	CR_up_ileum
chr4	44120979	44121996	CR_up_ileum
chr4	44125300	44128017	CR_up_ileum
chr4	44128363	44130500	CR_up_ileum
chr4	44132270	44133016	CR_up_ileum
chr4	53838482	53840083	CR_up_ileum
chr4	53913255	53915449	CR_up_ileum
chr4	53918388	53920097	CR_up_ileum
chr4	53927437	53928688	CR_up_ileum
chr4	53941711	53943074	CR_up_ileum
chr4	53943553	53945083	CR_up_ileum
chr4	54106733	54108209	CR_up_ileum
chr4	106403120	106404028	CR_up_ileum
chr4	106405712	106407143	CR_up_ileum
chr4	106410061	106412068	CR_up_ileum
chr4	106419098	106423298	CR_up_ileum
chr4	106444770	106445901	CR_up_ileum
chr4	106450702	106452052	CR_up_ileum
chr4	106460964	106462205	CR_up_ileum
chr4	106463394	106464597	CR_up_ileum
chr4	106464821	106466315	CR_up_ileum
chr4	106470479	106473498	CR_up_ileum
chr4	129177119	129180763	CR_up_ileum
chr4	129180964	129182333	CR_up_ileum
chr4	129184919	129187210	CR_up_ileum
chr4	129190331	129192928	CR_up_ileum
chr4	129218806	129220594	CR_up_ileum
chr4	146034314	146035413	CR_up_ileum
chr5	92617793	92618850	CR_up_ileum
chr5	92624732	92625149	CR_up_ileum
chr5	92632895	92635628	CR_up_ileum
chr5	92638888	92639727	CR_up_ileum
chr5	92641043	92641906	CR_up_ileum
chr5	92649245	92649910	CR_up_ileum
chr5	92650335	92651038	CR_up_ileum
chr5	92655773	92656441	CR_up_ileum
chr5	92668316	92669356	CR_up_ileum
chr5	92677120	92678413	CR_up_ileum
chr5	146690582	146692176	CR_up_ileum
chr5	146692705	146693347	CR_up_ileum
chr5	146723227	146724020	CR_up_ileum
chr5	146810440	146810915	CR_up_ileum
chr5	149890440	149892274	CR_up_ileum
chr5	149995155	149997114	CR_up_ileum
chr6	30120883	30126916	CR_up_ileum
chr6	30128102	30129003	CR_up_ileum
chr6	30155450	30156259	CR_up_ileum
chr6	30158646	30159347	CR_up_ileum
chr6	30160365	30163213	CR_up_ileum
chr6	30178306	30179046	CR_up_ileum
chr6	30180940	30182374	CR_up_ileum
chr6	30188017	30188541	CR_up_ileum
chr6	30202082	30203042	CR_up_ileum
chr6	30250228	30251463	CR_up_ileum
chr6	30252821	30255036	CR_up_ileum
chr6	30257049	30259127	CR_up_ileum
chr6	30261780	30262576	CR_up_ileum
chr6	30282161	30282766	CR_up_ileum
chr6	34811338	34812049	CR_up_ileum
chr6	34812344	34813784	CR_up_ileum
chr6	34815199	34816528	CR_up_ileum
chr6	34826825	34828993	CR_up_ileum
chr6	116297826	116298658	CR_up_ileum
chr6	116319639	116321014	CR_up_ileum
chr6	116333478	116334116	CR_up_ileum
chr6	116335322	116336811	CR_up_ileum
chr6	116349099	116350545	CR_up_ileum
chr6	116410517	116411473	CR_up_ileum
chr6	121160113	121162221	CR_up_ileum
chr6	121176092	121177766	CR_up_ileum
chr6	121182557	121183091	CR_up_ileum
chr6	121192769	121193680	CR_up_ileum
chr6	121195056	121196269	CR_up_ileum
chr6	121205468	121206382	CR_up_ileum
chr6	121210359	121211010	CR_up_ileum
chr6	121221855	121223270	CR_up_ileum
chr6	134974334	134975661	CR_up_ileum
chr6	134975889	134977169	CR_up_ileum
chr6	134979112	134979798	CR_up_ileum
chr6	134989961	134991082	CR_up_ileum
chr6	134998253	134999672	CR_up_ileum
chr6	135003646	135004317	CR_up_ileum
chr6	135010544	135011770	CR_up_ileum
chr6	135014812	135016599	CR_up_ileum
chr6	135023739	135024860	CR_up_ileum
chr6	135025709	135026989	CR_up_ileum
chr6	135037318	135038518	CR_up_ileum
chr6	146590333	146592173	CR_up_ileum
chr6	146612530	146614415	CR_up_ileum
chr6	146632998	146635668	CR_up_ileum
chr7	19796341	19799545	CR_up_ileum
chr7	19809740	19810766	CR_up_ileum
chr7	19812319	19815145	CR_up_ileum
chr7	19816676	19817682	CR_up_ileum
chr7	19820057	19822182	CR_up_ileum
chr7	19824407	19825289	CR_up_ileum
chr7	19826010	19826937	CR_up_ileum
chr7	19834255	19835314	CR_up_ileum
chr7	19837367	19838648	CR_up_ileum
chr7	19841907	19844849	CR_up_ileum
chr7	19849559	19852914	CR_up_ileum
chr7	19854156	19858378	CR_up_ileum
chr7	28885186	28893245	CR_up_ileum
chr7	28922404	28923852	CR_up_ileum
chr7	28932671	28934385	CR_up_ileum
chr7	28936203	28945373	CR_up_ileum
chr7	28945835	28946852	CR_up_ileum
chr7	52893791	52896525	CR_up_ileum
chr7	52897518	52901753	CR_up_ileum
chr7	52904171	52906461	CR_up_ileum
chr7	52909229	52910952	CR_up_ileum
chr7	52920021	52922220	CR_up_ileum
chr7	52924694	52925961	CR_up_ileum
chr7	52931821	52934797	CR_up_ileum
chr7	72837212	72839981	CR_up_ileum
chr7	72841114	72842062	CR_up_ileum
chr7	72849534	72850859	CR_up_ileum
chr7	72946635	72949409	CR_up_ileum
chr7	73005857	73008339	CR_up_ileum
chr7	73039708	73041131	CR_up_ileum
chr7	73102168	73104338	CR_up_ileum
chr7	88202065	88206373	CR_up_ileum
chr7	88218980	88221245	CR_up_ileum
chr7	88221511	88223891	CR_up_ileum
chr7	88254433	88256082	CR_up_ileum
chr7	88256371	88258460	CR_up_ileum
chr7	88259210	88263713	CR_up_ileum
chr7	88267802	88269359	CR_up_ileum
chr7	88277627	88280580	CR_up_ileum
chr7	88299713	88300495	CR_up_ileum
chr7	88307174	88307650	CR_up_ileum
chr7	88353368	88354413	CR_up_ileum
chr7	107335719	107337248	CR_up_ileum
chr7	107375512	107377402	CR_up_ileum
chr7	107428283	107428743	CR_up_ileum
chr7	107433519	107434465	CR_up_ileum
chr7	107436385	107437665	CR_up_ileum
chr7	117767667	117773024	CR_up_ileum
chr7	117773272	117775300	CR_up_ileum
chr7	117779958	117780765	CR_up_ileum
chr7	117788489	117789965	CR_up_ileum
chr7	117790108	117793254	CR_up_ileum
chr7	117832415	117833414	CR_up_ileum
chr7	117869788	117871083	CR_up_ileum
chr7	117872146	117873578	CR_up_ileum
chr7	117911092	117913440	CR_up_ileum
chr7	148557503	148558568	CR_up_ileum
chr7	148565371	148566040	CR_up_ileum
chr7	148573716	148575105	CR_up_ileum
chr7	148575916	148579238	CR_up_ileum
chr7	148588876	148589681	CR_up_ileum
chr7	148594455	148595980	CR_up_ileum
chr7	148599117	148600836	CR_up_ileum
chr7	148604187	148605334	CR_up_ileum
chr7	148605845	148606702	CR_up_ileum
chr7	148611587	148616083	CR_up_ileum
chr7	148619859	148622449	CR_up_ileum
chr7	148622694	148624272	CR_up_ileum
chr7	148626372	148627758	CR_up_ileum
chr7	148628201	148630541	CR_up_ileum
chr7	148632818	148634068	CR_up_ileum
chr7	150253802	150257630	CR_up_ileum
chr7	150258201	150260014	CR_up_ileum
chr7	150263902	150269946	CR_up_ileum
chr7	150271847	150273878	CR_up_ileum
chr7	150279478	150282582	CR_up_ileum
chr7	150285357	150286752	CR_up_ileum
chr7	152045373	152049940	CR_up_ileum
chr7	152052815	152053953	CR_up_ileum
chr7	152079948	152084998	CR_up_ileum
chr7	152092383	152094154	CR_up_ileum
chr8	3514263	3517845	CR_up_ileum
chr8	3535454	3538139	CR_up_ileum
chr8	3559086	3559614	CR_up_ileum
chr8	3565919	3566925	CR_up_ileum
chr8	3567161	3568880	CR_up_ileum
chr8	3576077	3576963	CR_up_ileum
chr8	10004841	10007873	CR_up_ileum
chr8	10013312	10014028	CR_up_ileum
chr8	10015840	10016842	CR_up_ileum
chr8	10017299	10018468	CR_up_ileum
chr8	10026668	10027401	CR_up_ileum
chr8	34627136	34628369	CR_up_ileum
chr8	107178765	107179616	CR_up_ileum
chr8	107194749	107195302	CR_up_ileum
chr8	107205379	107207176	CR_up_ileum
chr8	107207350	107208179	CR_up_ileum
chr8	107211801	107212997	CR_up_ileum
chr8	107254833	107256590	CR_up_ileum
chr8	107257336	107258430	CR_up_ileum
chr8	107265191	107266571	CR_up_ileum
chr8	107271615	107272164	CR_up_ileum
chr8	107310874	107311891	CR_up_ileum
chr8	107312474	107314772	CR_up_ileum
chr8	107332219	107333978	CR_up_ileum
chr8	107335516	107336051	CR_up_ileum
chr8	107339408	107340212	CR_up_ileum
chr8	125309762	125316120	CR_up_ileum
chr8	125316562	125319237	CR_up_ileum
chr8	125353918	125355866	CR_up_ileum
chr8	125357645	125359762	CR_up_ileum
chr9	7713995	7715205	CR_up_ileum
chr9	7763161	7765886	CR_up_ileum
chr9	7778465	7779163	CR_up_ileum
chr9	14643947	14644374	CR_up_ileum
chr9	14662654	14665524	CR_up_ileum
chr9	25058938	25061255	CR_up_ileum
chr9	25117121	25117850	CR_up_ileum
chr9	25125483	25126898	CR_up_ileum
chr9	25208123	25209082	CR_up_ileum
chr9	25247595	25248100	CR_up_ileum
chr9	25268115	25269192	CR_up_ileum
chr9	25284298	25285065	CR_up_ileum
chr9	25288704	25291051	CR_up_ileum
chr9	25295859	25296690	CR_up_ileum
chr9	25306180	25307315	CR_up_ileum
chr9	25312056	25313279	CR_up_ileum
chr9	25355244	25356630	CR_up_ileum
chr9	25356756	25358911	CR_up_ileum
chr9	25364788	25365409	CR_up_ileum
chr9	25385843	25387846	CR_up_ileum
chr9	25391095	25391931	CR_up_ileum
chr9	25398201	25400857	CR_up_ileum
chr9	30234071	30237051	CR_up_ileum
chr9	30245965	30246512	CR_up_ileum
chr9	30287239	30288900	CR_up_ileum
chr9	30371313	30371953	CR_up_ileum
chr9	30484308	30484808	CR_up_ileum
chr9	30627638	30629306	CR_up_ileum
chr9	30656921	30657893	CR_up_ileum
chr9	30683528	30685255	CR_up_ileum
chr9	30687969	30688983	CR_up_ileum
chr9	30691074	30691936	CR_up_ileum
chr9	30702854	30705414	CR_up_ileum
chr9	30715839	30716411	CR_up_ileum
chr9	30720894	30722998	CR_up_ileum
chr9	30727888	30731399	CR_up_ileum
chr9	30736264	30737197	CR_up_ileum
chr9	65907000	65909513	CR_up_ileum
chr9	65916490	65918103	CR_up_ileum
chr9	86588971	86590607	CR_up_ileum
chr9	86613463	86615283	CR_up_ileum
chr9	86638798	86639778	CR_up_ileum
chr9	86774103	86775924	CR_up_ileum
chr9	88135272	88136976	CR_up_ileum
chr9	88154452	88155826	CR_up_ileum
chr9	88168658	88170665	CR_up_ileum
chr9	88221761	88223202	CR_up_ileum
chrX	44535954	44536510	CR_up_ileum
chrX	100867811	100868226	CR_up_ileum
chrX	100869880	100870459	CR_up_ileum
chrX	100888052	100888927	CR_up_ileum
chrX	100889459	100891828	CR_up_ileum
chrX	100917737	100918321	CR_up_ileum
chrX	101015805	101018295	CR_up_ileum
chrX	159339190	159340649	CR_up_ileum
chrX	159353617	159354095	CR_up_ileum
chrX	159405237	159405922	CR_up_ileum
chrX	159424648	159425625	CR_up_ileum
chrX	159559695	159560261	CR_up_ileum
chrX	159566302	159567240	CR_up_ileum
chrX	159939991	159940572	CR_up_ileum
chrX	159949280	159950226	CR_up_ileum

## Sheet: up in CV colon
TABLE S9: Genome coordinates of DHS within the regulatory domain of genes with differential expression between microbiota colonization states (higher expression in CV colon).
chrom	start	stop	category
chr1	45851577	45853609	CV_up_colon
chr1	45873697	45874192	CV_up_colon
chr1	45881618	45882504	CV_up_colon
chr1	45916892	45917660	CV_up_colon
chr1	45932800	45934012	CV_up_colon
chr1	45934255	45934784	CV_up_colon
chr1	45950889	45951413	CV_up_colon
chr1	45960981	45962757	CV_up_colon
chr1	45981808	45983736	CV_up_colon
chr1	46045928	46046857	CV_up_colon
chr1	46060204	46060873	CV_up_colon
chr1	46063488	46064285	CV_up_colon
chr1	46074967	46075974	CV_up_colon
chr1	46088327	46089692	CV_up_colon
chr1	67102123	67103178	CV_up_colon
chr1	67107803	67108632	CV_up_colon
chr1	67149721	67150859	CV_up_colon
chr1	67190264	67190880	CV_up_colon
chr1	67227576	67228264	CV_up_colon
chr1	67243765	67244548	CV_up_colon
chr1	67440470	67441587	CV_up_colon
chr1	67523526	67525209	CV_up_colon
chr1	67529191	67529998	CV_up_colon
chr1	67564822	67565426	CV_up_colon
chr1	67592235	67593444	CV_up_colon
chr1	67686689	67687819	CV_up_colon
chr1	88994942	88995812	CV_up_colon
chr1	88996824	88999323	CV_up_colon
chr1	89049101	89053368	CV_up_colon
chr1	89982356	89983282	CV_up_colon
chr1	89990480	89992668	CV_up_colon
chr1	90005484	90006058	CV_up_colon
chr1	90016869	90017633	CV_up_colon
chr1	90026240	90027509	CV_up_colon
chr1	90031049	90031529	CV_up_colon
chr1	90036932	90037549	CV_up_colon
chr1	90040565	90041396	CV_up_colon
chr1	90054697	90055999	CV_up_colon
chr1	90082692	90083744	CV_up_colon
chr1	90084614	90085587	CV_up_colon
chr1	90103308	90104102	CV_up_colon
chr1	90107999	90121803	CV_up_colon
chr1	90121868	90148471	CV_up_colon
chr1	90148598	90166956	CV_up_colon
chr1	99769787	99770963	CV_up_colon
chr1	99799117	99799883	CV_up_colon
chr1	99807118	99808018	CV_up_colon
chr1	99808538	99809098	CV_up_colon
chr1	99814886	99815616	CV_up_colon
chr1	99822174	99823900	CV_up_colon
chr1	99834529	99835313	CV_up_colon
chr1	99839573	99840611	CV_up_colon
chr1	99856334	99857601	CV_up_colon
chr1	99858078	99858733	CV_up_colon
chr1	99866217	99866789	CV_up_colon
chr1	99873184	99874472	CV_up_colon
chr1	99922293	99923327	CV_up_colon
chr1	99925992	99926783	CV_up_colon
chr1	99932313	99932833	CV_up_colon
chr1	99934611	99935252	CV_up_colon
chr1	99944142	99944739	CV_up_colon
chr1	99968375	99969128	CV_up_colon
chr1	99980559	99981622	CV_up_colon
chr1	99985682	99986383	CV_up_colon
chr1	99988899	99989607	CV_up_colon
chr1	99990664	99993746	CV_up_colon
chr1	100055536	100056299	CV_up_colon
chr1	100075065	100076096	CV_up_colon
chr1	100246641	100247834	CV_up_colon
chr1	120284572	120287800	CV_up_colon
chr1	120354448	120356733	CV_up_colon
chr1	120373067	120373945	CV_up_colon
chr1	120389343	120389810	CV_up_colon
chr1	120394247	120395394	CV_up_colon
chr1	120468084	120469185	CV_up_colon
chr1	120491194	120493130	CV_up_colon
chr1	120493991	120496263	CV_up_colon
chr1	120519153	120520190	CV_up_colon
chr1	120523637	120525337	CV_up_colon
chr1	120526297	120527316	CV_up_colon
chr1	120532503	120533009	CV_up_colon
chr1	120539234	120540788	CV_up_colon
chr1	120544333	120545307	CV_up_colon
chr1	120546155	120547934	CV_up_colon
chr1	120586253	120587210	CV_up_colon
chr1	120642002	120644017	CV_up_colon
chr1	120654760	120656701	CV_up_colon
chr1	120664549	120666352	CV_up_colon
chr1	120668582	120669352	CV_up_colon
chr1	120720723	120724217	CV_up_colon
chr1	120774404	120776336	CV_up_colon
chr1	120777000	120778151	CV_up_colon
chr1	120809592	120811902	CV_up_colon
chr1	120812908	120813617	CV_up_colon
chr1	120849373	120850058	CV_up_colon
chr1	120850338	120854485	CV_up_colon
chr1	120854834	120856064	CV_up_colon
chr1	120862827	120863699	CV_up_colon
chr1	120871913	120872582	CV_up_colon
chr1	120897291	120899039	CV_up_colon
chr1	120918557	120920124	CV_up_colon
chr1	120920577	120922011	CV_up_colon
chr1	120928627	120929191	CV_up_colon
chr1	120944131	120945542	CV_up_colon
chr1	120947268	120951029	CV_up_colon
chr1	130140006	130142156	CV_up_colon
chr1	130254943	130257388	CV_up_colon
chr1	140801616	140802418	CV_up_colon
chr1	140805926	140807000	CV_up_colon
chr1	140808680	140809278	CV_up_colon
chr1	140824950	140827749	CV_up_colon
chr1	140850328	140851387	CV_up_colon
chr1	140852993	140854090	CV_up_colon
chr1	140855584	140856174	CV_up_colon
chr1	140856288	140856918	CV_up_colon
chr1	140858930	140860990	CV_up_colon
chr1	140863779	140865112	CV_up_colon
chr1	140870067	140870800	CV_up_colon
chr1	140879895	140881250	CV_up_colon
chr1	141052123	141053405	CV_up_colon
chr1	141058026	141058601	CV_up_colon
chr1	141090175	141091587	CV_up_colon
chr1	141164180	141165142	CV_up_colon
chr1	155746076	155748907	CV_up_colon
chr1	155751019	155751556	CV_up_colon
chr1	155751649	155752131	CV_up_colon
chr1	155756172	155756937	CV_up_colon
chr1	155757545	155758936	CV_up_colon
chr1	155769642	155770252	CV_up_colon
chr1	155771373	155772523	CV_up_colon
chr1	155777405	155778101	CV_up_colon
chr1	155781253	155781919	CV_up_colon
chr1	155784186	155784899	CV_up_colon
chr1	155804823	155805672	CV_up_colon
chr1	155809307	155809830	CV_up_colon
chr1	155810392	155811624	CV_up_colon
chr1	155816314	155817665	CV_up_colon
chr1	155835171	155836056	CV_up_colon
chr1	155839367	155840261	CV_up_colon
chr1	155846584	155847453	CV_up_colon
chr1	155850776	155851236	CV_up_colon
chr1	155871282	155871994	CV_up_colon
chr1	155879451	155880362	CV_up_colon
chr1	155880967	155882325	CV_up_colon
chr1	155883890	155884732	CV_up_colon
chr1	155888003	155888534	CV_up_colon
chr1	155889724	155890951	CV_up_colon
chr1	155923692	155924571	CV_up_colon
chr1	155927560	155928699	CV_up_colon
chr1	155959374	155960123	CV_up_colon
chr1	155964055	155966211	CV_up_colon
chr1	155995606	155998751	CV_up_colon
chr1	156003674	156004755	CV_up_colon
chr1	156027357	156028688	CV_up_colon
chr1	156029761	156030473	CV_up_colon
chr1	156036609	156038055	CV_up_colon
chr1	156051716	156052989	CV_up_colon
chr1	156087320	156087942	CV_up_colon
chr1	156128494	156129611	CV_up_colon
chr1	156423480	156427806	CV_up_colon
chr1	156481923	156484012	CV_up_colon
chr1	156523128	156523949	CV_up_colon
chr1	156572599	156575056	CV_up_colon
chr1	156576341	156577243	CV_up_colon
chr1	156632690	156633988	CV_up_colon
chr1	156635231	156635929	CV_up_colon
chr1	156638398	156640198	CV_up_colon
chr1	156729934	156733631	CV_up_colon
chr1	156801647	156804841	CV_up_colon
chr1	156853386	156854589	CV_up_colon
chr1	156860271	156862098	CV_up_colon
chr1	156872893	156873561	CV_up_colon
chr1	156874610	156876728	CV_up_colon
chr1	156895924	156896675	CV_up_colon
chr1	156910741	156912036	CV_up_colon
chr1	156916549	156917429	CV_up_colon
chr1	156918374	156919386	CV_up_colon
chr1	156921137	156922570	CV_up_colon
chr1	156929911	156932494	CV_up_colon
chr1	156944409	156947233	CV_up_colon
chr1	156987017	156987871	CV_up_colon
chr1	157091026	157092499	CV_up_colon
chr1	157128251	157129475	CV_up_colon
chr1	157140275	157141067	CV_up_colon
chr1	157169023	157169941	CV_up_colon
chr1	157237554	157238536	CV_up_colon
chr1	157246920	157247579	CV_up_colon
chr1	157259592	157260354	CV_up_colon
chr1	157263637	157264999	CV_up_colon
chr1	157269096	157269727	CV_up_colon
chr1	157276650	157277472	CV_up_colon
chr1	157277881	157278392	CV_up_colon
chr1	157285368	157286411	CV_up_colon
chr1	157328288	157330110	CV_up_colon
chr1	157338345	157339212	CV_up_colon
chr1	157344182	157345467	CV_up_colon
chr1	157363531	157364211	CV_up_colon
chr1	157369303	157370988	CV_up_colon
chr1	157375725	157377010	CV_up_colon
chr1	157384282	157384853	CV_up_colon
chr1	158791464	158792493	CV_up_colon
chr1	158837317	158837918	CV_up_colon
chr1	158847572	158848212	CV_up_colon
chr1	158868383	158872053	CV_up_colon
chr1	158886104	158887078	CV_up_colon
chr1	158912908	158913671	CV_up_colon
chr1	158920228	158921760	CV_up_colon
chr1	158924010	158924573	CV_up_colon
chr1	158926553	158927114	CV_up_colon
chr1	158927480	158928557	CV_up_colon
chr1	158931062	158931775	CV_up_colon
chr1	158939409	158940190	CV_up_colon
chr1	158990964	158993067	CV_up_colon
chr1	159003475	159004347	CV_up_colon
chr1	159006088	159007790	CV_up_colon
chr1	159010907	159012131	CV_up_colon
chr1	159016098	159017527	CV_up_colon
chr1	159031078	159032098	CV_up_colon
chr10	21098334	21098919	CV_up_colon
chr10	21102500	21103213	CV_up_colon
chr10	21131358	21132095	CV_up_colon
chr10	21140283	21141434	CV_up_colon
chr10	21166066	21166826	CV_up_colon
chr10	21167883	21168374	CV_up_colon
chr10	21174337	21175215	CV_up_colon
chr10	21184231	21186302	CV_up_colon
chr10	21189662	21191009	CV_up_colon
chr10	21210319	21212868	CV_up_colon
chr10	21272739	21275092	CV_up_colon
chr10	21285132	21285702	CV_up_colon
chr10	21291230	21292268	CV_up_colon
chr10	21293405	21294123	CV_up_colon
chr10	21295397	21296764	CV_up_colon
chr10	21320357	21321509	CV_up_colon
chr10	21324651	21325618	CV_up_colon
chr10	21328551	21330613	CV_up_colon
chr10	21332435	21334080	CV_up_colon
chr10	21392421	21393050	CV_up_colon
chr10	21398300	21399105	CV_up_colon
chr10	21404405	21406567	CV_up_colon
chr10	21406950	21408023	CV_up_colon
chr10	21414460	21415510	CV_up_colon
chr10	21431821	21433579	CV_up_colon
chr10	21434680	21435563	CV_up_colon
chr10	21455999	21456524	CV_up_colon
chr10	21496031	21497175	CV_up_colon
chr10	21508825	21510630	CV_up_colon
chr10	21524355	21525088	CV_up_colon
chr10	21546387	21547665	CV_up_colon
chr10	21572938	21573891	CV_up_colon
chr10	21576394	21576994	CV_up_colon
chr10	21601521	21602962	CV_up_colon
chr10	21627508	21628137	CV_up_colon
chr10	21666497	21667292	CV_up_colon
chr10	21710855	21715525	CV_up_colon
chr10	21715702	21716879	CV_up_colon
chr10	21721296	21722221	CV_up_colon
chr10	21724452	21725593	CV_up_colon
chr10	21726664	21727998	CV_up_colon
chr10	21729838	21730432	CV_up_colon
chr10	21755772	21756520	CV_up_colon
chr10	21777732	21779498	CV_up_colon
chr10	41750674	41751473	CV_up_colon
chr10	41770833	41772476	CV_up_colon
chr10	41774937	41775523	CV_up_colon
chr10	41784123	41784866	CV_up_colon
chr10	41790291	41791411	CV_up_colon
chr10	41792495	41793045	CV_up_colon
chr10	41801733	41802987	CV_up_colon
chr10	41807891	41810028	CV_up_colon
chr10	41812138	41812802	CV_up_colon
chr10	41823286	41823805	CV_up_colon
chr10	41826617	41829550	CV_up_colon
chr10	41834511	41834998	CV_up_colon
chr10	41835056	41836175	CV_up_colon
chr10	41837542	41839192	CV_up_colon
chr10	41841585	41842292	CV_up_colon
chr10	41889106	41891361	CV_up_colon
chr10	41893375	41894231	CV_up_colon
chr10	41897704	41899457	CV_up_colon
chr10	41911590	41912352	CV_up_colon
chr10	41921066	41921705	CV_up_colon
chr10	41922049	41923467	CV_up_colon
chr10	41949772	41951341	CV_up_colon
chr10	41966931	41967817	CV_up_colon
chr10	41993352	41998995	CV_up_colon
chr10	41999083	41999634	CV_up_colon
chr10	42010490	42011775	CV_up_colon
chr10	42014798	42015255	CV_up_colon
chr10	42019788	42021142	CV_up_colon
chr10	42183467	42185195	CV_up_colon
chr10	59707502	59708483	CV_up_colon
chr10	59709212	59709775	CV_up_colon
chr10	59718306	59719946	CV_up_colon
chr10	59739784	59741191	CV_up_colon
chr10	59744832	59745924	CV_up_colon
chr10	59766905	59769095	CV_up_colon
chr10	61517643	61518826	CV_up_colon
chr10	61522134	61525012	CV_up_colon
chr10	61532706	61534510	CV_up_colon
chr10	61564406	61565812	CV_up_colon
chr10	61567526	61568448	CV_up_colon
chr10	61571518	61574630	CV_up_colon
chr10	61873323	61874274	CV_up_colon
chr10	61875208	61876861	CV_up_colon
chr10	61878229	61879288	CV_up_colon
chr10	61884720	61885841	CV_up_colon
chr10	68834108	68834721	CV_up_colon
chr10	68860839	68863663	CV_up_colon
chr10	68914798	68915767	CV_up_colon
chr10	68996169	68997460	CV_up_colon
chr10	69018942	69019465	CV_up_colon
chr10	69033203	69035194	CV_up_colon
chr10	69098147	69099961	CV_up_colon
chr10	69117449	69118019	CV_up_colon
chr10	69119035	69119680	CV_up_colon
chr10	69124689	69125612	CV_up_colon
chr10	69152911	69154016	CV_up_colon
chr10	69244091	69245033	CV_up_colon
chr10	69255509	69257555	CV_up_colon
chr10	69308262	69309039	CV_up_colon
chr10	69332999	69333573	CV_up_colon
chr10	69334660	69336841	CV_up_colon
chr10	69350505	69351793	CV_up_colon
chr10	69369340	69370312	CV_up_colon
chr10	69370955	69371729	CV_up_colon
chr10	69372875	69373824	CV_up_colon
chr10	69378975	69380320	CV_up_colon
chr10	69385861	69386388	CV_up_colon
chr10	69386435	69388961	CV_up_colon
chr10	69391041	69391920	CV_up_colon
chr10	69393078	69393781	CV_up_colon
chr10	69398986	69401131	CV_up_colon
chr10	69426381	69427757	CV_up_colon
chr10	69483539	69484849	CV_up_colon
chr10	69497532	69498114	CV_up_colon
chr10	69502274	69503347	CV_up_colon
chr10	69513964	69514759	CV_up_colon
chr10	69522651	69524015	CV_up_colon
chr10	75026590	75029387	CV_up_colon
chr10	75494524	75496556	CV_up_colon
chr10	75530393	75531385	CV_up_colon
chr10	75559237	75560638	CV_up_colon
chr10	75564798	75565568	CV_up_colon
chr10	75580216	75581921	CV_up_colon
chr10	75589009	75590134	CV_up_colon
chr10	78094746	78095525	CV_up_colon
chr10	78097337	78098525	CV_up_colon
chr10	78149307	78150537	CV_up_colon
chr10	78156373	78157103	CV_up_colon
chr10	78175739	78176548	CV_up_colon
chr10	78179931	78181556	CV_up_colon
chr10	78206342	78207117	CV_up_colon
chr10	78209709	78210614	CV_up_colon
chr10	79608172	79609270	CV_up_colon
chr10	79610431	79613666	CV_up_colon
chr10	79621010	79621796	CV_up_colon
chr10	79621987	79623131	CV_up_colon
chr10	79623473	79624404	CV_up_colon
chr10	79791657	79793255	CV_up_colon
chr10	79793659	79795444	CV_up_colon
chr10	79802751	79803543	CV_up_colon
chr10	79806734	79808460	CV_up_colon
chr10	79810117	79812066	CV_up_colon
chr10	79880851	79881645	CV_up_colon
chr10	79893553	79897309	CV_up_colon
chr10	79898153	79899749	CV_up_colon
chr10	79908564	79909613	CV_up_colon
chr10	79937432	79938798	CV_up_colon
chr10	80544562	80545751	CV_up_colon
chr10	80555032	80556270	CV_up_colon
chr10	80557730	80558566	CV_up_colon
chr10	80565103	80565539	CV_up_colon
chr10	95413448	95414178	CV_up_colon
chr10	95432999	95434337	CV_up_colon
chr10	95478165	95479190	CV_up_colon
chr10	95496083	95496719	CV_up_colon
chr10	95510640	95511787	CV_up_colon
chr10	95537670	95538681	CV_up_colon
chr10	95539956	95540676	CV_up_colon
chr10	95543060	95544017	CV_up_colon
chr10	95551861	95552946	CV_up_colon
chr10	95559331	95559860	CV_up_colon
chr10	95560490	95560965	CV_up_colon
chr10	95569487	95570912	CV_up_colon
chr10	95586905	95587942	CV_up_colon
chr10	95588083	95589321	CV_up_colon
chr10	95593987	95595316	CV_up_colon
chr10	95643477	95644830	CV_up_colon
chr10	95663229	95664529	CV_up_colon
chr10	95676194	95677163	CV_up_colon
chr10	95683142	95684159	CV_up_colon
chr10	95692884	95693648	CV_up_colon
chr10	95701383	95702074	CV_up_colon
chr10	95857393	95858498	CV_up_colon
chr10	95859697	95862081	CV_up_colon
chr10	95863098	95863966	CV_up_colon
chr10	95868757	95869575	CV_up_colon
chr10	95900485	95902071	CV_up_colon
chr10	95902296	95903160	CV_up_colon
chr10	95941807	95942713	CV_up_colon
chr10	95977164	95979375	CV_up_colon
chr10	95990218	95991146	CV_up_colon
chr10	95996962	95998498	CV_up_colon
chr10	96037006	96038278	CV_up_colon
chr10	96078574	96081334	CV_up_colon
chr10	96086918	96088690	CV_up_colon
chr10	96090919	96091477	CV_up_colon
chr10	96123878	96124916	CV_up_colon
chr10	96125474	96126421	CV_up_colon
chr10	96145756	96146639	CV_up_colon
chr10	96148287	96150245	CV_up_colon
chr10	96152693	96154748	CV_up_colon
chr10	96156384	96158136	CV_up_colon
chr10	96184579	96185818	CV_up_colon
chr10	96186861	96188549	CV_up_colon
chr10	96192786	96193553	CV_up_colon
chr10	96213458	96213941	CV_up_colon
chr10	96214059	96214926	CV_up_colon
chr10	96246414	96247587	CV_up_colon
chr10	96249654	96250588	CV_up_colon
chr10	96284502	96286242	CV_up_colon
chr10	96338815	96339871	CV_up_colon
chr10	96386539	96389330	CV_up_colon
chr10	96397226	96397739	CV_up_colon
chr10	96443653	96444886	CV_up_colon
chr10	96500347	96501662	CV_up_colon
chr10	96541920	96543087	CV_up_colon
chr10	96613202	96613874	CV_up_colon
chr10	96620720	96623451	CV_up_colon
chr10	96623488	96624041	CV_up_colon
chr10	96682089	96683642	CV_up_colon
chr10	96710552	96711865	CV_up_colon
chr10	96767258	96767915	CV_up_colon
chr10	96774354	96776866	CV_up_colon
chr10	96802376	96803510	CV_up_colon
chr10	96807933	96808501	CV_up_colon
chr10	96838414	96838905	CV_up_colon
chr10	115257832	115258442	CV_up_colon
chr10	115266758	115267202	CV_up_colon
chr10	115270606	115271932	CV_up_colon
chr10	115454345	115456795	CV_up_colon
chr10	115507738	115509629	CV_up_colon
chr10	115520952	115521633	CV_up_colon
chr10	115531365	115531841	CV_up_colon
chr10	116729413	116730248	CV_up_colon
chr10	116757127	116758200	CV_up_colon
chr10	116767537	116768142	CV_up_colon
chr10	116812661	116815212	CV_up_colon
chr10	127309430	127309955	CV_up_colon
chr10	127313939	127317287	CV_up_colon
chr10	127329991	127331324	CV_up_colon
chr11	6122866	6123981	CV_up_colon
chr11	6151838	6153889	CV_up_colon
chr11	6154580	6154999	CV_up_colon
chr11	6161346	6162114	CV_up_colon
chr11	12130838	12134028	CV_up_colon
chr11	12191286	12192072	CV_up_colon
chr11	12214249	12215136	CV_up_colon
chr11	12231749	12232710	CV_up_colon
chr11	12236074	12236679	CV_up_colon
chr11	12259345	12259831	CV_up_colon
chr11	12273198	12274083	CV_up_colon
chr11	12290033	12291335	CV_up_colon
chr11	12297794	12298433	CV_up_colon
chr11	12302982	12304006	CV_up_colon
chr11	12304740	12305318	CV_up_colon
chr11	12305435	12306374	CV_up_colon
chr11	12309304	12310207	CV_up_colon
chr11	12311144	12312591	CV_up_colon
chr11	12342050	12344104	CV_up_colon
chr11	12363592	12365980	CV_up_colon
chr11	12368516	12369395	CV_up_colon
chr11	12373649	12374131	CV_up_colon
chr11	12395602	12396432	CV_up_colon
chr11	12416308	12416819	CV_up_colon
chr11	12431941	12432975	CV_up_colon
chr11	12459063	12459992	CV_up_colon
chr11	12710741	12712640	CV_up_colon
chr11	12742599	12744285	CV_up_colon
chr11	12757721	12758521	CV_up_colon
chr11	12772221	12773280	CV_up_colon
chr11	12773607	12774337	CV_up_colon
chr11	22588427	22589039	CV_up_colon
chr11	22619114	22620366	CV_up_colon
chr11	22625558	22626790	CV_up_colon
chr11	22634998	22635761	CV_up_colon
chr11	22639463	22640722	CV_up_colon
chr11	22646439	22647320	CV_up_colon
chr11	29479590	29480096	CV_up_colon
chr11	29512375	29515319	CV_up_colon
chr11	29536815	29539361	CV_up_colon
chr11	29545065	29546156	CV_up_colon
chr11	29591979	29594587	CV_up_colon
chr11	29641893	29643044	CV_up_colon
chr11	29651784	29653499	CV_up_colon
chr11	29671913	29672853	CV_up_colon
chr11	29687391	29687870	CV_up_colon
chr11	29695206	29696499	CV_up_colon
chr11	29700726	29702548	CV_up_colon
chr11	29724085	29727201	CV_up_colon
chr11	32166682	32168530	CV_up_colon
chr11	32182814	32184465	CV_up_colon
chr11	32186609	32187543	CV_up_colon
chr11	32195663	32197420	CV_up_colon
chr11	32199725	32200744	CV_up_colon
chr11	32220470	32221645	CV_up_colon
chr11	32224373	32225122	CV_up_colon
chr11	55008095	55009290	CV_up_colon
chr11	55017474	55018710	CV_up_colon
chr11	55024985	55026067	CV_up_colon
chr11	55026878	55028014	CV_up_colon
chr11	55030800	55031699	CV_up_colon
chr11	55053682	55054562	CV_up_colon
chr11	68901609	68903187	CV_up_colon
chr11	68907977	68909503	CV_up_colon
chr11	68910108	68911403	CV_up_colon
chr11	68911967	68912966	CV_up_colon
chr11	68913244	68913986	CV_up_colon
chr11	68915827	68916352	CV_up_colon
chr11	69615944	69619561	CV_up_colon
chr11	69732905	69733796	CV_up_colon
chr11	69733850	69736117	CV_up_colon
chr11	69736276	69736845	CV_up_colon
chr11	70288300	70289441	CV_up_colon
chr11	70313555	70314101	CV_up_colon
chr11	70318056	70319707	CV_up_colon
chr11	70319733	70320384	CV_up_colon
chr11	70323149	70324003	CV_up_colon
chr11	77550674	77551304	CV_up_colon
chr11	77557334	77558136	CV_up_colon
chr11	77576194	77578012	CV_up_colon
chr11	77578150	77579425	CV_up_colon
chr11	77579746	77580635	CV_up_colon
chr11	77585295	77586719	CV_up_colon
chr11	77596678	77598395	CV_up_colon
chr11	77598858	77600402	CV_up_colon
chr11	77606504	77607433	CV_up_colon
chr11	77614456	77615315	CV_up_colon
chr11	77628826	77629977	CV_up_colon
chr11	77633976	77635744	CV_up_colon
chr11	77639258	77639835	CV_up_colon
chr11	77640290	77641309	CV_up_colon
chr11	77666579	77669205	CV_up_colon
chr11	84748173	84749261	CV_up_colon
chr11	84757001	84757936	CV_up_colon
chr11	84758627	84759875	CV_up_colon
chr11	84765811	84766589	CV_up_colon
chr11	84768636	84769585	CV_up_colon
chr11	84770806	84773772	CV_up_colon
chr11	84782041	84782825	CV_up_colon
chr11	84785304	84786500	CV_up_colon
chr11	84792480	84793696	CV_up_colon
chr11	84794018	84795270	CV_up_colon
chr11	84952176	84954504	CV_up_colon
chr11	93848657	93849761	CV_up_colon
chr11	93855720	93859220	CV_up_colon
chr11	93948274	93948726	CV_up_colon
chr11	93989201	93989758	CV_up_colon
chr11	93990835	93991496	CV_up_colon
chr11	93993995	93996293	CV_up_colon
chr11	93998054	93999939	CV_up_colon
chr11	94004467	94005196	CV_up_colon
chr11	94005959	94007118	CV_up_colon
chr11	94019601	94021329	CV_up_colon
chr11	94021432	94023199	CV_up_colon
chr11	94023264	94023972	CV_up_colon
chr11	94024190	94025713	CV_up_colon
chr11	94032915	94034228	CV_up_colon
chr11	94054256	94054955	CV_up_colon
chr11	94063337	94064195	CV_up_colon
chr11	94070939	94074206	CV_up_colon
chr11	94086976	94087936	CV_up_colon
chr11	94097196	94097937	CV_up_colon
chr11	95708840	95709534	CV_up_colon
chr11	95714990	95715461	CV_up_colon
chr11	95719484	95722137	CV_up_colon
chr11	95737194	95738080	CV_up_colon
chr11	95772559	95773715	CV_up_colon
chr11	95774859	95777655	CV_up_colon
chr11	96650071	96651704	CV_up_colon
chr11	96683689	96686066	CV_up_colon
chr11	96690162	96692318	CV_up_colon
chr11	96692802	96693377	CV_up_colon
chr11	96698419	96699532	CV_up_colon
chr11	105828630	105830606	CV_up_colon
chr11	105830686	105831337	CV_up_colon
chr11	105848220	105851256	CV_up_colon
chr11	114528171	114531439	CV_up_colon
chr11	114536327	114539143	CV_up_colon
chr12	8553813	8554823	CV_up_colon
chr12	8645172	8645913	CV_up_colon
chr12	8647343	8648729	CV_up_colon
chr12	8680093	8682534	CV_up_colon
chr12	8705665	8706262	CV_up_colon
chr12	8765842	8766481	CV_up_colon
chr12	8767080	8768527	CV_up_colon
chr12	33409222	33410367	CV_up_colon
chr12	33411327	33413454	CV_up_colon
chr12	37967073	37968955	CV_up_colon
chr12	38176985	38177746	CV_up_colon
chr12	58672253	58674069	CV_up_colon
chr12	58676610	58677741	CV_up_colon
chr12	58686813	58687299	CV_up_colon
chr12	58723083	58724727	CV_up_colon
chr12	58763192	58766193	CV_up_colon
chr12	58785856	58786652	CV_up_colon
chr12	58792377	58793399	CV_up_colon
chr12	58814296	58815027	CV_up_colon
chr12	58876966	58878168	CV_up_colon
chr12	58888230	58889383	CV_up_colon
chr12	58900534	58901615	CV_up_colon
chr12	58912170	58913050	CV_up_colon
chr12	58931336	58932262	CV_up_colon
chr12	58947834	58948408	CV_up_colon
chr12	58991228	58993745	CV_up_colon
chr12	59018073	59018619	CV_up_colon
chr12	59073384	59074276	CV_up_colon
chr12	59095786	59096738	CV_up_colon
chr12	59131288	59132477	CV_up_colon
chr12	59140425	59141356	CV_up_colon
chr12	59168279	59170789	CV_up_colon
chr12	59177281	59178395	CV_up_colon
chr12	59297084	59297804	CV_up_colon
chr12	59305809	59306709	CV_up_colon
chr12	59311883	59316679	CV_up_colon
chr12	59333319	59334004	CV_up_colon
chr12	59368246	59370768	CV_up_colon
chr13	33854245	33855744	CV_up_colon
chr13	33985831	33986505	CV_up_colon
chr13	33991195	33992172	CV_up_colon
chr13	33994815	33996362	CV_up_colon
chr13	34022866	34023997	CV_up_colon
chr13	34025390	34029291	CV_up_colon
chr13	34043051	34044296	CV_up_colon
chr13	34048617	34049203	CV_up_colon
chr13	34056058	34058191	CV_up_colon
chr13	34087003	34087531	CV_up_colon
chr13	34093597	34095289	CV_up_colon
chr13	34128918	34130369	CV_up_colon
chr13	34130610	34131268	CV_up_colon
chr13	34136679	34138862	CV_up_colon
chr13	34146233	34147656	CV_up_colon
chr13	34154264	34154848	CV_up_colon
chr13	37495050	37495576	CV_up_colon
chr13	37518343	37519323	CV_up_colon
chr13	37525636	37527094	CV_up_colon
chr13	37538350	37539103	CV_up_colon
chr13	37542804	37545603	CV_up_colon
chr13	37548679	37549345	CV_up_colon
chr13	37551641	37552984	CV_up_colon
chr13	37557236	37558112	CV_up_colon
chr13	37559294	37560839	CV_up_colon
chr13	37569041	37571493	CV_up_colon
chr13	37583837	37585783	CV_up_colon
chr13	37597677	37602052	CV_up_colon
chr13	37616763	37618744	CV_up_colon
chr13	37633453	37634056	CV_up_colon
chr13	37638131	37639438	CV_up_colon
chr13	37648705	37649939	CV_up_colon
chr13	37651740	37655337	CV_up_colon
chr13	37669471	37670891	CV_up_colon
chr13	37678024	37679348	CV_up_colon
chr13	37683636	37684636	CV_up_colon
chr13	37711462	37712905	CV_up_colon
chr13	37716892	37718188	CV_up_colon
chr13	37736521	37737191	CV_up_colon
chr13	37742552	37743905	CV_up_colon
chr13	37748468	37749620	CV_up_colon
chr13	37757951	37760274	CV_up_colon
chr13	37762782	37763450	CV_up_colon
chr13	37777690	37778822	CV_up_colon
chr13	37797259	37798169	CV_up_colon
chr13	37804355	37805220	CV_up_colon
chr13	37806685	37809284	CV_up_colon
chr13	37820223	37821768	CV_up_colon
chr13	37823552	37824909	CV_up_colon
chr13	37842911	37844250	CV_up_colon
chr13	37852676	37854029	CV_up_colon
chr13	37868667	37871945	CV_up_colon
chr13	37873918	37874676	CV_up_colon
chr13	37876033	37876918	CV_up_colon
chr13	37890821	37892172	CV_up_colon
chr13	37892918	37895818	CV_up_colon
chr13	37916244	37920032	CV_up_colon
chr13	37922445	37923433	CV_up_colon
chr13	37924019	37926065	CV_up_colon
chr13	37938427	37939950	CV_up_colon
chr13	37945456	37946810	CV_up_colon
chr13	37949127	37950985	CV_up_colon
chr13	37958113	37959279	CV_up_colon
chr13	37970624	37972996	CV_up_colon
chr13	37974200	37975514	CV_up_colon
chr13	37984262	37985457	CV_up_colon
chr13	37987426	37988234	CV_up_colon
chr13	37990563	37991331	CV_up_colon
chr13	37995016	37995792	CV_up_colon
chr13	37999385	38001452	CV_up_colon
chr13	38033469	38035744	CV_up_colon
chr13	38035875	38036702	CV_up_colon
chr13	38037929	38039734	CV_up_colon
chr13	38050075	38050940	CV_up_colon
chr13	38054845	38056794	CV_up_colon
chr13	38061058	38061727	CV_up_colon
chr13	38062639	38063344	CV_up_colon
chr13	38084641	38086651	CV_up_colon
chr13	54762050	54763478	CV_up_colon
chr13	54777039	54778057	CV_up_colon
chr13	54779378	54780246	CV_up_colon
chr13	54787249	54790031	CV_up_colon
chr13	54794353	54796503	CV_up_colon
chr13	56662410	56663239	CV_up_colon
chr13	56676513	56677779	CV_up_colon
chr13	56682780	56684527	CV_up_colon
chr13	56689136	56691134	CV_up_colon
chr13	56698775	56699810	CV_up_colon
chr13	56701514	56702468	CV_up_colon
chr13	56709162	56711747	CV_up_colon
chr13	56716956	56718393	CV_up_colon
chr13	56727407	56729315	CV_up_colon
chr13	56731116	56733427	CV_up_colon
chr13	56742948	56743643	CV_up_colon
chr13	56749460	56750398	CV_up_colon
chr13	56759173	56760568	CV_up_colon
chr13	56779095	56781025	CV_up_colon
chr13	56783271	56784359	CV_up_colon
chr13	56793278	56794083	CV_up_colon
chr13	73829118	73830567	CV_up_colon
chr13	73850118	73851106	CV_up_colon
chr13	73851326	73852061	CV_up_colon
chr13	73855656	73856188	CV_up_colon
chr13	73865884	73866689	CV_up_colon
chr13	73869563	73871688	CV_up_colon
chr13	73871872	73873803	CV_up_colon
chr13	73885901	73887669	CV_up_colon
chr13	75844263	75847461	CV_up_colon
chr13	75863628	75864866	CV_up_colon
chr13	75889620	75890613	CV_up_colon
chr13	75934753	75936863	CV_up_colon
chr13	75968974	75969679	CV_up_colon
chr13	75972664	75973457	CV_up_colon
chr13	75976446	75979781	CV_up_colon
chr13	75982884	75983950	CV_up_colon
chr13	76011563	76012898	CV_up_colon
chr13	76015300	76015836	CV_up_colon
chr13	76078425	76079090	CV_up_colon
chr13	76080185	76081720	CV_up_colon
chr13	94540906	94543237	CV_up_colon
chr13	94562990	94563745	CV_up_colon
chr13	94605797	94607099	CV_up_colon
chr13	94608816	94611135	CV_up_colon
chr13	94625520	94626462	CV_up_colon
chr13	94626803	94627567	CV_up_colon
chr13	94658282	94660723	CV_up_colon
chr13	94661815	94662846	CV_up_colon
chr13	94691906	94692863	CV_up_colon
chr13	94706308	94707420	CV_up_colon
chr13	94708912	94710281	CV_up_colon
chr13	94767417	94768656	CV_up_colon
chr13	94782892	94784672	CV_up_colon
chr13	94819773	94820574	CV_up_colon
chr13	94826737	94828673	CV_up_colon
chr13	94832265	94833138	CV_up_colon
chr13	94842472	94844505	CV_up_colon
chr13	94856251	94857970	CV_up_colon
chr13	94864091	94865409	CV_up_colon
chr13	94878942	94879487	CV_up_colon
chr13	94891698	94892611	CV_up_colon
chr13	94904900	94906856	CV_up_colon
chr13	94912458	94913755	CV_up_colon
chr13	94924342	94924881	CV_up_colon
chr13	94928975	94932806	CV_up_colon
chr13	94935114	94935930	CV_up_colon
chr13	94943450	94945127	CV_up_colon
chr13	94950011	94950935	CV_up_colon
chr13	94960011	94962336	CV_up_colon
chr13	94962583	94964250	CV_up_colon
chr13	94975027	94975782	CV_up_colon
chr13	94991516	94992664	CV_up_colon
chr13	95019964	95020649	CV_up_colon
chr13	95022511	95023863	CV_up_colon
chr13	95028497	95029879	CV_up_colon
chr13	95030848	95032175	CV_up_colon
chr13	95053809	95056972	CV_up_colon
chr14	26730085	26731196	CV_up_colon
chr14	26745698	26747512	CV_up_colon
chr14	26750557	26751139	CV_up_colon
chr14	26756373	26758040	CV_up_colon
chr14	26869791	26870945	CV_up_colon
chr14	26885461	26887283	CV_up_colon
chr14	26890323	26890904	CV_up_colon
chr14	26895864	26897802	CV_up_colon
chr14	27009712	27010533	CV_up_colon
chr14	27025120	27026884	CV_up_colon
chr14	27029932	27030505	CV_up_colon
chr14	27035775	27037397	CV_up_colon
chr14	35348729	35349965	CV_up_colon
chr14	35353728	35354500	CV_up_colon
chr14	35354867	35355820	CV_up_colon
chr14	35361247	35363869	CV_up_colon
chr14	35364150	35365423	CV_up_colon
chr14	35382578	35383992	CV_up_colon
chr14	35397061	35397595	CV_up_colon
chr14	35398257	35402370	CV_up_colon
chr14	55304356	55306460	CV_up_colon
chr14	55320080	55320698	CV_up_colon
chr14	55363208	55363794	CV_up_colon
chr14	55372639	55374404	CV_up_colon
chr14	55378345	55379876	CV_up_colon
chr14	55398979	55401163	CV_up_colon
chr14	55404651	55406000	CV_up_colon
chr14	55424586	55425576	CV_up_colon
chr14	56631042	56632847	CV_up_colon
chr14	56652957	56653974	CV_up_colon
chr14	56658610	56659088	CV_up_colon
chr14	56922959	56923519	CV_up_colon
chr14	56932776	56935891	CV_up_colon
chr14	56941711	56942345	CV_up_colon
chr14	56943655	56944239	CV_up_colon
chr14	56954813	56955320	CV_up_colon
chr14	56957656	56958266	CV_up_colon
chr14	56970669	56971549	CV_up_colon
chr14	56982759	56985202	CV_up_colon
chr14	56994442	56995643	CV_up_colon
chr14	66700719	66702073	CV_up_colon
chr14	66704252	66704766	CV_up_colon
chr14	66707020	66709101	CV_up_colon
chr14	66709133	66710601	CV_up_colon
chr14	66723619	66724490	CV_up_colon
chr14	66738404	66738879	CV_up_colon
chr14	66742636	66744250	CV_up_colon
chr14	80386356	80387156	CV_up_colon
chr14	80668936	80669346	CV_up_colon
chr14	81245265	81246089	CV_up_colon
chr14	81300550	81302506	CV_up_colon
chr14	121790494	121791872	CV_up_colon
chr14	121813659	121814397	CV_up_colon
chr14	121816294	121817725	CV_up_colon
chr14	121821343	121823426	CV_up_colon
chr14	121824549	121825380	CV_up_colon
chr14	121828988	121829595	CV_up_colon
chr14	121834904	121835370	CV_up_colon
chr14	121836175	121836853	CV_up_colon
chr14	121844357	121844890	CV_up_colon
chr14	121850061	121851505	CV_up_colon
chr14	121854521	121855347	CV_up_colon
chr14	121863533	121864024	CV_up_colon
chr14	121870454	121871467	CV_up_colon
chr14	121889336	121889965	CV_up_colon
chr14	121892155	121894027	CV_up_colon
chr14	121897070	121897706	CV_up_colon
chr14	121901197	121902062	CV_up_colon
chr14	121903392	121905034	CV_up_colon
chr14	121940235	121941249	CV_up_colon
chr14	121945328	121946718	CV_up_colon
chr14	121962507	121964836	CV_up_colon
chr14	121967779	121968724	CV_up_colon
chr14	121972203	121973319	CV_up_colon
chr14	121978153	121978826	CV_up_colon
chr14	121988337	121989767	CV_up_colon
chr14	122007465	122008190	CV_up_colon
chr14	122010171	122011400	CV_up_colon
chr14	122033372	122033955	CV_up_colon
chr14	122059572	122060784	CV_up_colon
chr14	122095483	122098239	CV_up_colon
chr15	3123366	3125402	CV_up_colon
chr15	3151924	3152680	CV_up_colon
chr15	3163697	3164173	CV_up_colon
chr15	3164885	3165732	CV_up_colon
chr15	3171244	3171870	CV_up_colon
chr15	3172370	3173446	CV_up_colon
chr15	3177528	3180002	CV_up_colon
chr15	3196976	3198648	CV_up_colon
chr15	3219342	3221748	CV_up_colon
chr15	3247441	3248098	CV_up_colon
chr15	21814882	21815325	CV_up_colon
chr15	27119389	27119979	CV_up_colon
chr15	27164438	27164995	CV_up_colon
chr15	27245982	27246476	CV_up_colon
chr15	27255189	27256932	CV_up_colon
chr15	27258881	27259749	CV_up_colon
chr15	27269883	27270811	CV_up_colon
chr15	27271070	27271882	CV_up_colon
chr15	27289814	27290753	CV_up_colon
chr15	27354430	27355668	CV_up_colon
chr15	27359301	27361322	CV_up_colon
chr15	27362226	27363307	CV_up_colon
chr15	27371646	27372093	CV_up_colon
chr15	27373999	27375182	CV_up_colon
chr15	27395254	27397320	CV_up_colon
chr15	27407112	27408086	CV_up_colon
chr15	27420804	27422813	CV_up_colon
chr15	27435843	27437693	CV_up_colon
chr15	27458560	27460406	CV_up_colon
chr15	27482932	27483570	CV_up_colon
chr15	27498230	27500373	CV_up_colon
chr15	27507577	27509476	CV_up_colon
chr15	27512257	27513229	CV_up_colon
chr15	27542455	27543147	CV_up_colon
chr15	27558477	27561192	CV_up_colon
chr15	40861079	40861770	CV_up_colon
chr15	40869295	40870866	CV_up_colon
chr15	40986546	40987331	CV_up_colon
chr15	40993828	40994841	CV_up_colon
chr15	40995087	40996121	CV_up_colon
chr15	41094128	41094714	CV_up_colon
chr15	41157147	41157688	CV_up_colon
chr15	41277869	41281186	CV_up_colon
chr15	41443434	41444282	CV_up_colon
chr15	41482293	41483298	CV_up_colon
chr15	41488421	41489084	CV_up_colon
chr15	41524544	41525276	CV_up_colon
chr15	41526365	41527047	CV_up_colon
chr15	41541562	41542497	CV_up_colon
chr15	41556456	41557329	CV_up_colon
chr15	41558475	41559483	CV_up_colon
chr15	41582667	41583664	CV_up_colon
chr15	41588595	41590051	CV_up_colon
chr15	41600458	41601060	CV_up_colon
chr15	41619649	41621805	CV_up_colon
chr15	41650217	41650735	CV_up_colon
chr15	41660926	41661950	CV_up_colon
chr15	41662009	41662867	CV_up_colon
chr15	41674852	41675701	CV_up_colon
chr15	74720874	74724043	CV_up_colon
chr15	74726686	74727387	CV_up_colon
chr15	74749836	74750538	CV_up_colon
chr15	74753634	74754603	CV_up_colon
chr15	74760688	74762890	CV_up_colon
chr15	74765203	74766097	CV_up_colon
chr15	74784464	74787660	CV_up_colon
chr15	74790925	74791787	CV_up_colon
chr15	74797702	74799373	CV_up_colon
chr15	75823694	75825695	CV_up_colon
chr15	75827799	75830237	CV_up_colon
chr15	75837208	75837850	CV_up_colon
chr15	75838285	75840813	CV_up_colon
chr15	75843206	75846139	CV_up_colon
chr15	75898917	75900796	CV_up_colon
chr15	75910382	75912091	CV_up_colon
chr15	75920358	75922987	CV_up_colon
chr15	75944678	75945542	CV_up_colon
chr15	75947972	75950178	CV_up_colon
chr15	75963574	75964353	CV_up_colon
chr15	75965180	75968455	CV_up_colon
chr15	75986159	75987037	CV_up_colon
chr15	75988126	75989462	CV_up_colon
chr15	75996336	75997276	CV_up_colon
chr15	75997929	75998535	CV_up_colon
chr15	76000969	76002832	CV_up_colon
chr15	76016663	76018222	CV_up_colon
chr15	76020063	76021075	CV_up_colon
chr15	76025376	76027413	CV_up_colon
chr15	76027923	76030605	CV_up_colon
chr15	76034257	76035126	CV_up_colon
chr15	76036559	76040088	CV_up_colon
chr15	76058490	76060783	CV_up_colon
chr15	76061233	76063834	CV_up_colon
chr15	76069456	76069957	CV_up_colon
chr15	76122909	76126095	CV_up_colon
chr15	76135048	76138316	CV_up_colon
chr15	79553011	79554334	CV_up_colon
chr15	79570950	79573465	CV_up_colon
chr15	79575034	79576603	CV_up_colon
chr15	79583225	79584210	CV_up_colon
chr15	79595071	79596426	CV_up_colon
chr15	79962844	79964887	CV_up_colon
chr15	79970005	79972157	CV_up_colon
chr15	79987565	79992060	CV_up_colon
chr15	79999870	80000380	CV_up_colon
chr15	80003239	80005281	CV_up_colon
chr15	80019245	80020945	CV_up_colon
chr15	80021769	80025437	CV_up_colon
chr15	80038585	80039553	CV_up_colon
chr15	80055443	80056146	CV_up_colon
chr15	81574517	81577298	CV_up_colon
chr15	81614763	81615991	CV_up_colon
chr15	81632455	81633833	CV_up_colon
chr15	81640477	81643536	CV_up_colon
chr15	81661075	81662392	CV_up_colon
chr15	81665956	81668180	CV_up_colon
chr15	81669846	81670612	CV_up_colon
chr15	81675978	81676833	CV_up_colon
chr15	81678331	81679161	CV_up_colon
chr15	81686272	81690819	CV_up_colon
chr15	82223871	82226832	CV_up_colon
chr15	82236758	82238632	CV_up_colon
chr15	82247012	82248432	CV_up_colon
chr15	82268214	82269061	CV_up_colon
chr15	82611848	82613782	CV_up_colon
chr15	82623841	82626186	CV_up_colon
chr15	82626433	82627293	CV_up_colon
chr15	82635579	82636182	CV_up_colon
chr15	82636998	82638826	CV_up_colon
chr15	82639173	82641043	CV_up_colon
chr15	82645117	82646112	CV_up_colon
chr15	82728612	82731017	CV_up_colon
chr16	32430325	32432264	CV_up_colon
chr16	32449736	32450248	CV_up_colon
chr16	32462660	32464245	CV_up_colon
chr16	32484215	32485038	CV_up_colon
chr16	32487209	32488326	CV_up_colon
chr16	32488949	32489569	CV_up_colon
chr16	84879157	84880008	CV_up_colon
chr16	84955491	84956206	CV_up_colon
chr16	84995507	84996881	CV_up_colon
chr16	85029148	85029833	CV_up_colon
chr16	85033875	85036375	CV_up_colon
chr16	85070254	85070821	CV_up_colon
chr16	85091492	85093577	CV_up_colon
chr16	85131106	85131963	CV_up_colon
chr16	85132108	85135114	CV_up_colon
chr16	85136020	85136550	CV_up_colon
chr16	85148753	85149621	CV_up_colon
chr16	85155526	85156292	CV_up_colon
chr16	85160221	85161231	CV_up_colon
chr16	85162946	85163523	CV_up_colon
chr16	85167977	85168489	CV_up_colon
chr16	85172204	85174803	CV_up_colon
chr16	85176509	85177888	CV_up_colon
chr16	85198341	85198876	CV_up_colon
chr16	85215897	85216692	CV_up_colon
chr16	85280250	85280942	CV_up_colon
chr16	85348724	85349290	CV_up_colon
chr16	85357665	85358273	CV_up_colon
chr16	85398217	85398863	CV_up_colon
chr17	6600363	6601728	CV_up_colon
chr17	6612679	6613417	CV_up_colon
chr17	6615146	6616270	CV_up_colon
chr17	6637710	6639480	CV_up_colon
chr17	6654689	6655360	CV_up_colon
chr17	6683965	6684923	CV_up_colon
chr17	6805990	6806779	CV_up_colon
chr17	6821965	6823342	CV_up_colon
chr17	6845168	6846207	CV_up_colon
chr17	6848048	6848681	CV_up_colon
chr17	6859632	6860970	CV_up_colon
chr17	6889188	6890130	CV_up_colon
chr17	14087882	14088699	CV_up_colon
chr17	14096196	14097091	CV_up_colon
chr17	14106662	14107418	CV_up_colon
chr17	14130382	14130933	CV_up_colon
chr17	14134858	14135818	CV_up_colon
chr17	14172125	14173620	CV_up_colon
chr17	14173901	14174614	CV_up_colon
chr17	14183853	14184512	CV_up_colon
chr17	14192918	14193979	CV_up_colon
chr17	14240067	14240894	CV_up_colon
chr17	14297337	14298540	CV_up_colon
chr17	14311411	14313608	CV_up_colon
chr17	14315032	14316309	CV_up_colon
chr17	14338217	14341816	CV_up_colon
chr17	14342213	14343654	CV_up_colon
chr17	14357747	14358431	CV_up_colon
chr17	14362965	14366217	CV_up_colon
chr17	14369585	14370131	CV_up_colon
chr17	14370535	14371196	CV_up_colon
chr17	14408960	14410996	CV_up_colon
chr17	24277389	24279471	CV_up_colon
chr17	24288435	24289773	CV_up_colon
chr17	24299425	24301112	CV_up_colon
chr17	24304788	24307568	CV_up_colon
chr17	24310321	24310870	CV_up_colon
chr17	24339311	24341337	CV_up_colon
chr17	24341437	24344297	CV_up_colon
chr17	24344598	24346812	CV_up_colon
chr17	24348083	24349589	CV_up_colon
chr17	24356479	24358441	CV_up_colon
chr17	26557318	26558788	CV_up_colon
chr17	26559075	26559949	CV_up_colon
chr17	26560673	26562979	CV_up_colon
chr17	26566543	26567327	CV_up_colon
chr17	26588296	26590233	CV_up_colon
chr17	26594395	26596102	CV_up_colon
chr17	26599452	26600192	CV_up_colon
chr17	26603173	26604170	CV_up_colon
chr17	26639349	26640731	CV_up_colon
chr17	26642948	26646509	CV_up_colon
chr17	26651469	26652057	CV_up_colon
chr17	26659392	26661712	CV_up_colon
chr17	26673990	26675826	CV_up_colon
chr17	26685477	26686985	CV_up_colon
chr17	27647256	27651763	CV_up_colon
chr17	27656636	27658518	CV_up_colon
chr17	27671559	27672284	CV_up_colon
chr17	27683341	27684915	CV_up_colon
chr17	27688235	27689053	CV_up_colon
chr17	27691630	27695054	CV_up_colon
chr17	27701425	27703671	CV_up_colon
chr17	28510685	28511333	CV_up_colon
chr17	28511414	28513187	CV_up_colon
chr17	28523059	28523963	CV_up_colon
chr17	28544110	28545712	CV_up_colon
chr17	28561049	28561789	CV_up_colon
chr17	28571357	28572686	CV_up_colon
chr17	28577995	28579989	CV_up_colon
chr17	28621425	28623758	CV_up_colon
chr17	28643359	28644276	CV_up_colon
chr17	28647456	28650204	CV_up_colon
chr17	28652433	28653505	CV_up_colon
chr17	28654493	28656160	CV_up_colon
chr17	28657459	28661403	CV_up_colon
chr17	33042080	33042874	CV_up_colon
chr17	33052651	33053592	CV_up_colon
chr17	33053724	33054812	CV_up_colon
chr17	33055777	33056990	CV_up_colon
chr17	33061389	33062500	CV_up_colon
chr17	33064519	33065326	CV_up_colon
chr17	33073416	33074085	CV_up_colon
chr17	33083068	33085503	CV_up_colon
chr17	43532345	43533596	CV_up_colon
chr17	43579008	43579866	CV_up_colon
chr17	43595229	43596164	CV_up_colon
chr17	43597175	43598142	CV_up_colon
chr17	43624780	43626350	CV_up_colon
chr17	43633046	43634112	CV_up_colon
chr17	43636953	43637451	CV_up_colon
chr17	43638641	43640162	CV_up_colon
chr17	43640411	43642278	CV_up_colon
chr17	43655453	43656228	CV_up_colon
chr17	43671383	43672399	CV_up_colon
chr17	43680887	43681531	CV_up_colon
chr17	43694375	43696220	CV_up_colon
chr17	43700384	43701092	CV_up_colon
chr17	44256249	44256890	CV_up_colon
chr17	44258029	44259190	CV_up_colon
chr17	44266050	44267795	CV_up_colon
chr17	44284575	44286185	CV_up_colon
chr17	44288121	44289629	CV_up_colon
chr17	44299203	44300301	CV_up_colon
chr17	44302560	44303320	CV_up_colon
chr17	44324564	44327142	CV_up_colon
chr17	44329768	44331080	CV_up_colon
chr17	44336092	44336552	CV_up_colon
chr17	44339313	44340729	CV_up_colon
chr17	44363868	44364622	CV_up_colon
chr17	44366886	44368545	CV_up_colon
chr17	44375421	44377660	CV_up_colon
chr17	44383256	44383982	CV_up_colon
chr17	44393417	44395175	CV_up_colon
chr17	44397470	44397965	CV_up_colon
chr17	44398217	44399342	CV_up_colon
chr17	44437601	44438868	CV_up_colon
chr17	44486000	44488236	CV_up_colon
chr17	44526886	44527678	CV_up_colon
chr17	44592146	44593244	CV_up_colon
chr17	44655542	44657164	CV_up_colon
chr17	44679568	44680192	CV_up_colon
chr17	44681579	44682861	CV_up_colon
chr17	44846618	44847380	CV_up_colon
chr17	44870557	44873778	CV_up_colon
chr17	45717846	45718968	CV_up_colon
chr17	45721408	45722474	CV_up_colon
chr17	45731716	45733392	CV_up_colon
chr17	45733494	45734534	CV_up_colon
chr17	45735638	45737312	CV_up_colon
chr17	70779003	70780221	CV_up_colon
chr17	70876339	70877889	CV_up_colon
chr17	70982561	70983416	CV_up_colon
chr17	70995915	70996439	CV_up_colon
chr17	71013084	71014110	CV_up_colon
chr17	71032714	71033888	CV_up_colon
chr17	71055768	71057804	CV_up_colon
chr17	71077796	71078775	CV_up_colon
chr17	71082074	71082598	CV_up_colon
chr17	71086685	71088252	CV_up_colon
chr17	71095680	71096544	CV_up_colon
chr17	71096927	71098668	CV_up_colon
chr17	71102624	71105987	CV_up_colon
chr17	71128275	71131322	CV_up_colon
chr17	71158916	71159696	CV_up_colon
chr17	71166742	71168090	CV_up_colon
chr17	71181030	71181608	CV_up_colon
chr17	71183594	71184446	CV_up_colon
chr17	71184565	71185338	CV_up_colon
chr17	71185895	71186545	CV_up_colon
chr17	71187836	71188547	CV_up_colon
chr17	71192153	71193149	CV_up_colon
chr17	71194483	71195861	CV_up_colon
chr17	71198039	71198880	CV_up_colon
chr17	71198939	71199442	CV_up_colon
chr17	71199686	71203896	CV_up_colon
chr17	71213918	71216415	CV_up_colon
chr17	71221454	71223403	CV_up_colon
chr17	71237735	71238688	CV_up_colon
chr17	71243672	71245486	CV_up_colon
chr17	71307107	71307678	CV_up_colon
chr17	71312814	71313392	CV_up_colon
chr17	71317130	71318484	CV_up_colon
chr17	71334750	71338325	CV_up_colon
chr17	85418020	85418636	CV_up_colon
chr17	85422597	85424083	CV_up_colon
chr17	85426553	85427170	CV_up_colon
chr17	85427270	85428342	CV_up_colon
chr17	85432220	85432928	CV_up_colon
chr17	85442072	85443369	CV_up_colon
chr17	85443804	85445989	CV_up_colon
chr17	85451360	85452551	CV_up_colon
chr18	32157478	32159559	CV_up_colon
chr18	32179447	32181423	CV_up_colon
chr18	32194679	32195189	CV_up_colon
chr18	32195303	32198698	CV_up_colon
chr18	32213701	32215274	CV_up_colon
chr18	32217884	32218364	CV_up_colon
chr18	34999744	35001907	CV_up_colon
chr18	35009420	35010387	CV_up_colon
chr18	35018720	35023913	CV_up_colon
chr18	35046589	35048297	CV_up_colon
chr18	35048395	35049073	CV_up_colon
chr18	35060024	35061345	CV_up_colon
chr18	35074927	35076090	CV_up_colon
chr18	35090462	35092537	CV_up_colon
chr18	37302514	37305051	CV_up_colon
chr18	37377646	37378281	CV_up_colon
chr18	37802500	37804665	CV_up_colon
chr18	37815010	37816065	CV_up_colon
chr18	37901419	37902323	CV_up_colon
chr18	37910947	37912264	CV_up_colon
chr18	37920834	37921822	CV_up_colon
chr18	37925317	37926700	CV_up_colon
chr18	37965394	37968856	CV_up_colon
chr18	37973885	37976137	CV_up_colon
chr18	37981178	37982822	CV_up_colon
chr18	37987117	37988528	CV_up_colon
chr18	38011454	38012545	CV_up_colon
chr18	38036752	38037832	CV_up_colon
chr18	38039391	38040358	CV_up_colon
chr18	43883241	43885268	CV_up_colon
chr18	43886642	43887099	CV_up_colon
chr18	43891229	43892470	CV_up_colon
chr18	43896659	43897466	CV_up_colon
chr18	60754675	60756723	CV_up_colon
chr18	60765465	60767731	CV_up_colon
chr18	60781706	60784494	CV_up_colon
chr18	60797153	60798347	CV_up_colon
chr18	60806784	60809743	CV_up_colon
chr18	60815877	60818285	CV_up_colon
chr18	60819441	60822088	CV_up_colon
chr18	60839944	60841042	CV_up_colon
chr18	60855663	60857998	CV_up_colon
chr18	60869977	60870831	CV_up_colon
chr18	77303164	77305771	CV_up_colon
chr18	77358028	77359051	CV_up_colon
chr18	77360015	77360731	CV_up_colon
chr18	77365697	77366152	CV_up_colon
chr18	77414090	77415198	CV_up_colon
chr18	77423433	77425815	CV_up_colon
chr18	77442412	77443664	CV_up_colon
chr18	77446211	77447859	CV_up_colon
chr18	77489797	77490394	CV_up_colon
chr18	77496264	77498092	CV_up_colon
chr18	77515112	77517176	CV_up_colon
chr18	84845663	84846944	CV_up_colon
chr18	84851118	84852376	CV_up_colon
chr18	84853761	84855570	CV_up_colon
chr18	84857631	84858160	CV_up_colon
chr18	84876763	84878405	CV_up_colon
chr19	5636156	5639124	CV_up_colon
chr19	5648350	5649920	CV_up_colon
chr19	5653802	5655705	CV_up_colon
chr19	5662560	5664187	CV_up_colon
chr19	6101958	6102922	CV_up_colon
chr19	6105378	6106589	CV_up_colon
chr19	6117205	6119098	CV_up_colon
chr19	10397650	10398978	CV_up_colon
chr19	10407853	10408706	CV_up_colon
chr19	10433337	10435350	CV_up_colon
chr19	10438302	10438899	CV_up_colon
chr19	10449031	10450378	CV_up_colon
chr19	10462742	10465149	CV_up_colon
chr19	10476916	10478319	CV_up_colon
chr19	10509084	10512457	CV_up_colon
chr19	10523974	10524779	CV_up_colon
chr19	10530839	10533398	CV_up_colon
chr19	20480426	20481448	CV_up_colon
chr19	20494871	20495429	CV_up_colon
chr19	20508852	20509474	CV_up_colon
chr19	20512181	20512688	CV_up_colon
chr19	20520682	20521123	CV_up_colon
chr19	20523793	20524726	CV_up_colon
chr19	20566349	20566973	CV_up_colon
chr19	20621205	20622206	CV_up_colon
chr19	20623737	20624384	CV_up_colon
chr19	20626723	20627606	CV_up_colon
chr19	20632963	20634279	CV_up_colon
chr19	20675217	20677344	CV_up_colon
chr19	20686996	20687603	CV_up_colon
chr19	20708658	20709847	CV_up_colon
chr19	20712584	20713165	CV_up_colon
chr19	20714087	20714553	CV_up_colon
chr19	20727138	20729499	CV_up_colon
chr19	20788996	20789428	CV_up_colon
chr19	21345515	21347769	CV_up_colon
chr19	21348343	21349674	CV_up_colon
chr19	21349962	21350598	CV_up_colon
chr19	21390074	21391142	CV_up_colon
chr19	21446878	21448499	CV_up_colon
chr19	21450889	21452328	CV_up_colon
chr19	21453722	21455291	CV_up_colon
chr19	21535028	21536124	CV_up_colon
chr19	21546473	21547555	CV_up_colon
chr19	21550745	21551908	CV_up_colon
chr19	21561553	21562366	CV_up_colon
chr19	21578911	21579938	CV_up_colon
chr19	21584499	21585051	CV_up_colon
chr19	21638285	21639170	CV_up_colon
chr19	21645287	21646928	CV_up_colon
chr19	21664091	21665015	CV_up_colon
chr19	21678266	21679265	CV_up_colon
chr19	21696722	21697282	CV_up_colon
chr19	21697875	21699292	CV_up_colon
chr19	21702660	21703316	CV_up_colon
chr19	21708481	21709393	CV_up_colon
chr19	21719737	21721449	CV_up_colon
chr19	39772086	39773129	CV_up_colon
chr19	39819669	39820657	CV_up_colon
chr19	39825253	39825751	CV_up_colon
chr19	39846678	39847727	CV_up_colon
chr19	40371047	40372697	CV_up_colon
chr19	40381547	40383158	CV_up_colon
chr19	40406263	40406770	CV_up_colon
chr19	40408323	40408872	CV_up_colon
chr19	40417419	40418040	CV_up_colon
chr19	40420133	40420685	CV_up_colon
chr19	40422640	40424123	CV_up_colon
chr19	40465895	40467103	CV_up_colon
chr19	40468892	40470031	CV_up_colon
chr19	40475615	40476217	CV_up_colon
chr19	40476620	40477178	CV_up_colon
chr19	40510934	40512744	CV_up_colon
chr19	40550576	40553215	CV_up_colon
chr19	40559230	40559982	CV_up_colon
chr19	40561959	40562797	CV_up_colon
chr19	40574422	40574950	CV_up_colon
chr19	40586059	40589059	CV_up_colon
chr19	40594887	40595397	CV_up_colon
chr19	40619113	40619961	CV_up_colon
chr19	40635949	40636459	CV_up_colon
chr19	40644927	40645903	CV_up_colon
chr19	40661220	40664506	CV_up_colon
chr19	43841921	43842778	CV_up_colon
chr19	43850776	43851502	CV_up_colon
chr19	43856330	43856998	CV_up_colon
chr19	43883557	43884988	CV_up_colon
chr19	43887134	43888687	CV_up_colon
chr19	43906683	43907556	CV_up_colon
chr19	43931747	43932239	CV_up_colon
chr19	43948828	43950350	CV_up_colon
chr19	43950468	43951112	CV_up_colon
chr19	43953152	43954784	CV_up_colon
chr19	43958657	43959988	CV_up_colon
chr19	43961827	43962812	CV_up_colon
chr19	43963694	43965616	CV_up_colon
chr19	43968434	43969834	CV_up_colon
chr19	43975086	43975965	CV_up_colon
chr19	43978276	43979326	CV_up_colon
chr19	43979509	43980968	CV_up_colon
chr19	46412558	46414588	CV_up_colon
chr19	46419472	46420038	CV_up_colon
chr19	46422832	46425362	CV_up_colon
chr19	55406880	55407796	CV_up_colon
chr19	55416003	55418414	CV_up_colon
chr19	55488458	55489003	CV_up_colon
chr19	55497736	55499414	CV_up_colon
chr19	55514756	55515538	CV_up_colon
chr19	55517987	55518612	CV_up_colon
chr19	55525708	55526699	CV_up_colon
chr19	55548686	55549232	CV_up_colon
chr19	55554931	55555523	CV_up_colon
chr19	55573557	55574089	CV_up_colon
chr19	55576001	55576676	CV_up_colon
chr19	55581839	55582893	CV_up_colon
chr19	55588274	55588960	CV_up_colon
chr19	55606731	55607994	CV_up_colon
chr19	55609175	55609854	CV_up_colon
chr19	55611850	55612711	CV_up_colon
chr19	55616674	55617440	CV_up_colon
chr19	55619703	55620780	CV_up_colon
chr19	55626635	55629732	CV_up_colon
chr19	55644449	55645549	CV_up_colon
chr19	55648426	55649914	CV_up_colon
chr19	55659623	55660618	CV_up_colon
chr19	55666386	55668627	CV_up_colon
chr19	55669264	55671729	CV_up_colon
chr19	55699791	55700852	CV_up_colon
chr19	55712630	55713499	CV_up_colon
chr19	55713606	55714209	CV_up_colon
chr19	55717510	55719115	CV_up_colon
chr19	55749214	55749986	CV_up_colon
chr19	55762893	55764563	CV_up_colon
chr19	55773062	55773906	CV_up_colon
chr19	55774475	55776759	CV_up_colon
chr19	55788347	55789906	CV_up_colon
chr19	55796564	55797634	CV_up_colon
chr19	55806867	55808266	CV_up_colon
chr19	55810442	55810957	CV_up_colon
chr19	55812529	55813081	CV_up_colon
chr19	55814974	55816640	CV_up_colon
chr19	55816816	55819424	CV_up_colon
chr19	55820698	55821365	CV_up_colon
chr19	55821619	55822919	CV_up_colon
chr19	55848713	55850182	CV_up_colon
chr19	55851297	55851924	CV_up_colon
chr19	55861637	55862464	CV_up_colon
chr19	55864363	55865742	CV_up_colon
chr19	55869506	55870328	CV_up_colon
chr19	55871978	55873739	CV_up_colon
chr19	55880651	55882492	CV_up_colon
chr19	55882766	55883384	CV_up_colon
chr19	55897360	55898542	CV_up_colon
chr19	55899527	55900738	CV_up_colon
chr2	6287480	6288457	CV_up_colon
chr2	6298961	6300455	CV_up_colon
chr2	6300609	6302129	CV_up_colon
chr2	6326233	6326953	CV_up_colon
chr2	6328084	6329569	CV_up_colon
chr2	6333633	6335343	CV_up_colon
chr2	6349460	6350635	CV_up_colon
chr2	6357134	6357488	CV_up_colon
chr2	6380314	6381032	CV_up_colon
chr2	6389473	6390827	CV_up_colon
chr2	6505543	6505963	CV_up_colon
chr2	6518030	6519293	CV_up_colon
chr2	6641434	6643490	CV_up_colon
chr2	6792350	6794213	CV_up_colon
chr2	7081128	7081706	CV_up_colon
chr2	7166893	7168601	CV_up_colon
chr2	7171817	7173065	CV_up_colon
chr2	11113855	11115527	CV_up_colon
chr2	11153562	11154062	CV_up_colon
chr2	11175585	11176012	CV_up_colon
chr2	11209611	11210670	CV_up_colon
chr2	11252709	11254444	CV_up_colon
chr2	11296645	11297148	CV_up_colon
chr2	11297275	11298305	CV_up_colon
chr2	11319910	11321713	CV_up_colon
chr2	11337688	11338490	CV_up_colon
chr2	11350953	11352048	CV_up_colon
chr2	11422077	11426341	CV_up_colon
chr2	11456215	11457906	CV_up_colon
chr2	11464187	11464916	CV_up_colon
chr2	11473606	11476462	CV_up_colon
chr2	11520759	11521359	CV_up_colon
chr2	11523505	11525352	CV_up_colon
chr2	15447520	15448612	CV_up_colon
chr2	16131614	16132093	CV_up_colon
chr2	19577907	19581208	CV_up_colon
chr2	19637178	19637993	CV_up_colon
chr2	19647435	19648978	CV_up_colon
chr2	19840690	19841750	CV_up_colon
chr2	20053453	20053864	CV_up_colon
chr2	20197514	20198301	CV_up_colon
chr2	20259999	20262396	CV_up_colon
chr2	20366792	20367894	CV_up_colon
chr2	20384680	20385402	CV_up_colon
chr2	20416175	20416907	CV_up_colon
chr2	20439544	20443169	CV_up_colon
chr2	20447459	20448420	CV_up_colon
chr2	20467815	20469938	CV_up_colon
chr2	20480732	20482011	CV_up_colon
chr2	20505332	20505815	CV_up_colon
chr2	20518634	20519689	CV_up_colon
chr2	20537336	20538010	CV_up_colon
chr2	20571176	20571855	CV_up_colon
chr2	20578752	20580107	CV_up_colon
chr2	20586927	20588375	CV_up_colon
chr2	20594474	20595353	CV_up_colon
chr2	20610884	20611543	CV_up_colon
chr2	20615027	20616121	CV_up_colon
chr2	20618325	20618852	CV_up_colon
chr2	20643165	20646951	CV_up_colon
chr2	20656760	20657609	CV_up_colon
chr2	20657762	20659913	CV_up_colon
chr2	20662006	20662704	CV_up_colon
chr2	20674223	20676301	CV_up_colon
chr2	20680520	20681433	CV_up_colon
chr2	20682556	20684039	CV_up_colon
chr2	20695811	20696579	CV_up_colon
chr2	20697833	20698627	CV_up_colon
chr2	20701150	20702716	CV_up_colon
chr2	20752355	20753019	CV_up_colon
chr2	20789601	20791634	CV_up_colon
chr2	20815640	20816326	CV_up_colon
chr2	20820238	20821209	CV_up_colon
chr2	20836479	20837352	CV_up_colon
chr2	20856004	20856955	CV_up_colon
chr2	20857986	20860473	CV_up_colon
chr2	20882856	20884246	CV_up_colon
chr2	20888329	20891879	CV_up_colon
chr2	22750115	22752068	CV_up_colon
chr2	22769933	22770359	CV_up_colon
chr2	22861675	22862361	CV_up_colon
chr2	22871050	22872324	CV_up_colon
chr2	22877189	22877624	CV_up_colon
chr2	22894255	22896269	CV_up_colon
chr2	27369295	27371750	CV_up_colon
chr2	27389968	27391493	CV_up_colon
chr2	27394924	27396797	CV_up_colon
chr2	27408048	27408804	CV_up_colon
chr2	27415760	27417964	CV_up_colon
chr2	27426722	27429903	CV_up_colon
chr2	27445644	27449678	CV_up_colon
chr2	27480005	27483482	CV_up_colon
chr2	27511217	27512913	CV_up_colon
chr2	27525994	27528256	CV_up_colon
chr2	27531477	27533892	CV_up_colon
chr2	27541457	27542524	CV_up_colon
chr2	27554870	27555763	CV_up_colon
chr2	27558516	27560392	CV_up_colon
chr2	27569494	27571617	CV_up_colon
chr2	27573107	27574600	CV_up_colon
chr2	27575028	27576293	CV_up_colon
chr2	27594444	27596875	CV_up_colon
chr2	27613195	27615776	CV_up_colon
chr2	27617376	27621649	CV_up_colon
chr2	27624823	27626870	CV_up_colon
chr2	27627077	27628262	CV_up_colon
chr2	29650042	29650502	CV_up_colon
chr2	29657655	29659418	CV_up_colon
chr2	29663302	29663823	CV_up_colon
chr2	29672732	29673862	CV_up_colon
chr2	29674945	29676512	CV_up_colon
chr2	70955057	70957316	CV_up_colon
chr2	70983782	70984727	CV_up_colon
chr2	70993385	70994110	CV_up_colon
chr2	71049400	71050848	CV_up_colon
chr2	71129277	71130717	CV_up_colon
chr2	71203803	71206291	CV_up_colon
chr2	84351057	84352027	CV_up_colon
chr2	84355266	84355886	CV_up_colon
chr2	84358866	84360662	CV_up_colon
chr2	84360940	84361800	CV_up_colon
chr2	84390705	84392424	CV_up_colon
chr2	84457918	84458549	CV_up_colon
chr2	84458693	84459679	CV_up_colon
chr2	84462778	84463270	CV_up_colon
chr2	84466762	84467838	CV_up_colon
chr2	84472913	84473686	CV_up_colon
chr2	84475743	84476969	CV_up_colon
chr2	84489675	84491373	CV_up_colon
chr2	84500387	84500858	CV_up_colon
chr2	90941053	90942190	CV_up_colon
chr2	90954903	90956466	CV_up_colon
chr2	90997016	90998788	CV_up_colon
chr2	91022073	91024586	CV_up_colon
chr2	91034553	91036937	CV_up_colon
chr2	91042302	91044219	CV_up_colon
chr2	91489249	91491452	CV_up_colon
chr2	91494918	91496072	CV_up_colon
chr2	91524057	91524581	CV_up_colon
chr2	102555870	102556584	CV_up_colon
chr2	102583910	102586341	CV_up_colon
chr2	102595531	102596182	CV_up_colon
chr2	102604767	102605942	CV_up_colon
chr2	102643963	102644757	CV_up_colon
chr2	102655087	102656774	CV_up_colon
chr2	102667909	102669144	CV_up_colon
chr2	102669327	102669812	CV_up_colon
chr2	102706730	102708207	CV_up_colon
chr2	102740399	102742553	CV_up_colon
chr2	102761503	102762280	CV_up_colon
chr2	102782154	102783115	CV_up_colon
chr2	102815452	102816115	CV_up_colon
chr2	102858974	102859648	CV_up_colon
chr2	102894054	102895042	CV_up_colon
chr2	102902964	102903601	CV_up_colon
chr2	104655512	104659255	CV_up_colon
chr2	104687752	104688208	CV_up_colon
chr2	104688416	104690510	CV_up_colon
chr2	104698826	104699912	CV_up_colon
chr2	110292396	110293408	CV_up_colon
chr2	110326586	110327589	CV_up_colon
chr2	110404962	110405675	CV_up_colon
chr2	118379768	118380753	CV_up_colon
chr2	118411481	118412830	CV_up_colon
chr2	118423202	118425296	CV_up_colon
chr2	118550613	118552100	CV_up_colon
chr2	118553740	118556755	CV_up_colon
chr2	118568925	118569462	CV_up_colon
chr2	118570242	118573392	CV_up_colon
chr2	118584973	118586484	CV_up_colon
chr2	118587494	118588898	CV_up_colon
chr2	118590081	118593132	CV_up_colon
chr2	118595630	118596184	CV_up_colon
chr2	118598035	118598795	CV_up_colon
chr2	118600132	118600686	CV_up_colon
chr2	118604726	118606377	CV_up_colon
chr2	118615974	118617343	CV_up_colon
chr2	118639398	118640900	CV_up_colon
chr2	120433945	120435655	CV_up_colon
chr2	120454265	120455758	CV_up_colon
chr2	122020247	122020808	CV_up_colon
chr2	122032122	122033344	CV_up_colon
chr2	122046940	122048376	CV_up_colon
chr2	122053387	122054413	CV_up_colon
chr2	122059585	122061710	CV_up_colon
chr2	122066515	122068233	CV_up_colon
chr2	122068808	122070711	CV_up_colon
chr2	122085880	122087963	CV_up_colon
chr2	122091567	122093431	CV_up_colon
chr2	122110583	122112578	CV_up_colon
chr2	123925320	123926091	CV_up_colon
chr2	123926282	123927133	CV_up_colon
chr2	124000011	124001655	CV_up_colon
chr2	124010778	124011867	CV_up_colon
chr2	124222351	124222931	CV_up_colon
chr2	124332531	124334061	CV_up_colon
chr2	124354066	124354769	CV_up_colon
chr2	124418215	124419116	CV_up_colon
chr2	124424306	124425845	CV_up_colon
chr2	124427019	124428638	CV_up_colon
chr2	124435217	124437235	CV_up_colon
chr2	124443878	124445156	CV_up_colon
chr2	124449214	124450766	CV_up_colon
chr2	124544743	124546653	CV_up_colon
chr2	124584344	124585334	CV_up_colon
chr2	124730574	124731244	CV_up_colon
chr2	124754090	124754739	CV_up_colon
chr2	127415566	127416410	CV_up_colon
chr2	127441520	127442377	CV_up_colon
chr2	127443078	127443987	CV_up_colon
chr2	127472422	127473168	CV_up_colon
chr2	127475608	127476169	CV_up_colon
chr2	127480477	127482633	CV_up_colon
chr2	127493566	127494244	CV_up_colon
chr2	127509134	127510280	CV_up_colon
chr2	127544544	127545211	CV_up_colon
chr2	127547847	127550504	CV_up_colon
chr2	127553970	127556673	CV_up_colon
chr2	127560505	127563322	CV_up_colon
chr2	132777320	132778350	CV_up_colon
chr2	132795890	132797108	CV_up_colon
chr2	132799001	132799601	CV_up_colon
chr2	132814935	132817095	CV_up_colon
chr2	132818841	132819813	CV_up_colon
chr2	132845386	132846790	CV_up_colon
chr2	132938819	132940144	CV_up_colon
chr2	132982000	132983199	CV_up_colon
chr2	133019928	133022165	CV_up_colon
chr2	133204158	133205038	CV_up_colon
chr2	133206618	133209551	CV_up_colon
chr2	133217224	133218655	CV_up_colon
chr2	133245287	133246481	CV_up_colon
chr2	133248771	133249958	CV_up_colon
chr2	133256767	133258587	CV_up_colon
chr2	133269129	133269635	CV_up_colon
chr2	133280779	133282177	CV_up_colon
chr2	133292401	133293729	CV_up_colon
chr2	133306304	133307826	CV_up_colon
chr2	133323146	133325098	CV_up_colon
chr2	133326338	133327962	CV_up_colon
chr2	133336652	133338073	CV_up_colon
chr2	133343261	133344316	CV_up_colon
chr2	133362392	133363211	CV_up_colon
chr2	133375835	133376847	CV_up_colon
chr2	133377532	133381006	CV_up_colon
chr2	133390029	133390721	CV_up_colon
chr2	133391663	133392616	CV_up_colon
chr2	133440227	133440941	CV_up_colon
chr2	133492117	133493772	CV_up_colon
chr2	133548407	133550445	CV_up_colon
chr2	133564372	133565797	CV_up_colon
chr2	133574211	133574735	CV_up_colon
chr2	133575879	133576473	CV_up_colon
chr2	133579530	133580477	CV_up_colon
chr2	133581599	133582193	CV_up_colon
chr2	133692751	133693535	CV_up_colon
chr2	133699611	133700599	CV_up_colon
chr2	133842790	133843325	CV_up_colon
chr2	133855189	133856007	CV_up_colon
chr2	134306607	134308050	CV_up_colon
chr2	134375177	134376205	CV_up_colon
chr2	152673207	152674576	CV_up_colon
chr2	152712430	152713564	CV_up_colon
chr2	155061419	155063979	CV_up_colon
chr2	155101380	155104660	CV_up_colon
chr2	155120860	155121905	CV_up_colon
chr2	155142488	155143682	CV_up_colon
chr2	160157551	160159563	CV_up_colon
chr2	160173908	160174380	CV_up_colon
chr2	160175083	160175834	CV_up_colon
chr2	160178974	160179951	CV_up_colon
chr2	160190033	160194556	CV_up_colon
chr2	160203577	160204670	CV_up_colon
chr2	160403270	160405027	CV_up_colon
chr2	160417413	160419263	CV_up_colon
chr2	160423111	160424175	CV_up_colon
chr2	160427511	160428281	CV_up_colon
chr2	160445456	160448415	CV_up_colon
chr2	160465416	160466496	CV_up_colon
chr2	163483814	163485487	CV_up_colon
chr2	163507825	163508948	CV_up_colon
chr2	163531558	163532176	CV_up_colon
chr2	163544138	163545960	CV_up_colon
chr2	163550126	163552245	CV_up_colon
chr2	163552360	163553591	CV_up_colon
chr2	163561441	163562657	CV_up_colon
chr2	163574403	163577276	CV_up_colon
chr2	173935202	173937783	CV_up_colon
chr2	173942187	173943437	CV_up_colon
chr2	174036635	174038230	CV_up_colon
chr2	174137549	174138496	CV_up_colon
chr2	174150336	174153678	CV_up_colon
chr2	174153814	174157344	CV_up_colon
chr2	180687616	180690059	CV_up_colon
chr2	180697332	180699165	CV_up_colon
chr2	180700743	180702939	CV_up_colon
chr2	180730121	180732372	CV_up_colon
chr2	180771317	180775240	CV_up_colon
chr2	180776332	180779276	CV_up_colon
chr2	181053653	181055259	CV_up_colon
chr2	181058273	181058974	CV_up_colon
chr2	181068698	181069303	CV_up_colon
chr3	5218180	5220203	CV_up_colon
chr3	5575509	5577373	CV_up_colon
chr3	5860206	5861022	CV_up_colon
chr3	6138804	6139303	CV_up_colon
chr3	8006084	8007696	CV_up_colon
chr3	8034824	8036743	CV_up_colon
chr3	28161021	28164632	CV_up_colon
chr3	28202697	28203477	CV_up_colon
chr3	28273715	28274635	CV_up_colon
chr3	28301103	28301586	CV_up_colon
chr3	28305333	28306438	CV_up_colon
chr3	28394187	28395105	CV_up_colon
chr3	28441975	28443063	CV_up_colon
chr3	28461305	28462203	CV_up_colon
chr3	28484534	28485889	CV_up_colon
chr3	28603989	28605688	CV_up_colon
chr3	28608639	28609603	CV_up_colon
chr3	28644646	28645741	CV_up_colon
chr3	55030365	55031790	CV_up_colon
chr3	55045790	55047638	CV_up_colon
chr3	55172661	55173591	CV_up_colon
chr3	55323859	55324922	CV_up_colon
chr3	57147444	57149562	CV_up_colon
chr3	57252094	57252888	CV_up_colon
chr3	57273958	57275578	CV_up_colon
chr3	57378566	57381233	CV_up_colon
chr3	62958734	62959475	CV_up_colon
chr3	62960631	62961642	CV_up_colon
chr3	62963090	62964249	CV_up_colon
chr3	63098798	63100982	CV_up_colon
chr3	63101614	63102752	CV_up_colon
chr3	63147721	63148200	CV_up_colon
chr3	63188762	63189652	CV_up_colon
chr3	63275889	63276724	CV_up_colon
chr3	63312688	63313917	CV_up_colon
chr3	63358531	63359382	CV_up_colon
chr3	63364038	63365546	CV_up_colon
chr3	63374158	63375373	CV_up_colon
chr3	63413368	63414572	CV_up_colon
chr3	63532098	63534398	CV_up_colon
chr3	63610660	63611814	CV_up_colon
chr3	63617922	63619229	CV_up_colon
chr3	63623969	63624625	CV_up_colon
chr3	63627774	63629320	CV_up_colon
chr3	72771572	72772050	CV_up_colon
chr3	72780240	72781056	CV_up_colon
chr3	72800956	72802047	CV_up_colon
chr3	72807013	72807727	CV_up_colon
chr3	72850007	72850940	CV_up_colon
chr3	72857234	72857758	CV_up_colon
chr3	72869791	72870645	CV_up_colon
chr3	73273652	73274721	CV_up_colon
chr3	73376562	73377741	CV_up_colon
chr3	73426369	73426967	CV_up_colon
chr3	73472038	73472835	CV_up_colon
chr3	73476964	73477945	CV_up_colon
chr3	73511512	73512940	CV_up_colon
chr3	73521291	73522748	CV_up_colon
chr3	73535562	73536122	CV_up_colon
chr3	73546615	73547103	CV_up_colon
chr3	74337845	74338467	CV_up_colon
chr3	89854866	89858048	CV_up_colon
chr3	92053838	92055196	CV_up_colon
chr3	92083552	92086031	CV_up_colon
chr3	92086054	92086668	CV_up_colon
chr3	92088112	92089808	CV_up_colon
chr3	92120335	92121095	CV_up_colon
chr3	94145669	94146518	CV_up_colon
chr3	94167110	94168444	CV_up_colon
chr3	94169986	94171910	CV_up_colon
chr3	94175399	94179073	CV_up_colon
chr3	94180007	94182067	CV_up_colon
chr3	94216248	94217720	CV_up_colon
chr3	94246723	94247885	CV_up_colon
chr3	96000334	96002827	CV_up_colon
chr3	96022770	96026145	CV_up_colon
chr3	96042025	96044630	CV_up_colon
chr3	96048937	96049787	CV_up_colon
chr3	96049960	96051316	CV_up_colon
chr3	96065827	96068208	CV_up_colon
chr3	96072046	96074347	CV_up_colon
chr3	96081404	96082884	CV_up_colon
chr3	98537560	98539209	CV_up_colon
chr3	98544926	98545443	CV_up_colon
chr3	98566005	98566658	CV_up_colon
chr3	98566786	98567376	CV_up_colon
chr3	98567919	98568875	CV_up_colon
chr3	98585790	98588457	CV_up_colon
chr3	101099257	101100472	CV_up_colon
chr3	101107764	101108788	CV_up_colon
chr3	101176091	101176749	CV_up_colon
chr3	101180425	101182591	CV_up_colon
chr3	101182811	101185087	CV_up_colon
chr3	101190219	101190942	CV_up_colon
chr3	101195740	101196420	CV_up_colon
chr3	101199342	101201383	CV_up_colon
chr3	101209040	101211037	CV_up_colon
chr3	101247157	101249615	CV_up_colon
chr3	101250986	101251620	CV_up_colon
chr3	101265488	101266870	CV_up_colon
chr3	101290107	101290742	CV_up_colon
chr3	101297298	101299293	CV_up_colon
chr3	101303712	101305130	CV_up_colon
chr3	101309961	101311727	CV_up_colon
chr3	101317417	101318605	CV_up_colon
chr3	101320345	101322025	CV_up_colon
chr3	101322477	101323463	CV_up_colon
chr3	101330144	101331521	CV_up_colon
chr3	101332031	101333635	CV_up_colon
chr3	101354358	101356467	CV_up_colon
chr3	101374399	101377613	CV_up_colon
chr3	101398672	101399859	CV_up_colon
chr3	101401051	101401911	CV_up_colon
chr3	101404938	101406518	CV_up_colon
chr3	101406912	101409543	CV_up_colon
chr3	128905495	128908219	CV_up_colon
chr3	128916144	128919414	CV_up_colon
chr3	128919830	128921986	CV_up_colon
chr3	128926461	128929557	CV_up_colon
chr3	128959111	128960171	CV_up_colon
chr3	128975797	128976807	CV_up_colon
chr3	129002490	129003225	CV_up_colon
chr3	129006800	129007261	CV_up_colon
chr3	129010929	129012104	CV_up_colon
chr3	129034755	129036511	CV_up_colon
chr3	129045382	129046212	CV_up_colon
chr3	129081348	129082676	CV_up_colon
chr3	129114252	129115103	CV_up_colon
chr3	129124665	129125235	CV_up_colon
chr3	129223412	129223814	CV_up_colon
chr3	137956287	137956919	CV_up_colon
chr3	137968332	137970082	CV_up_colon
chr3	137972746	137974357	CV_up_colon
chr3	137975438	137976439	CV_up_colon
chr3	138002508	138003172	CV_up_colon
chr3	141706445	141706851	CV_up_colon
chr3	141789129	141790128	CV_up_colon
chr3	141793811	141794651	CV_up_colon
chr3	141831466	141832713	CV_up_colon
chr3	141881899	141884592	CV_up_colon
chr3	141885095	141886085	CV_up_colon
chr3	141908660	141909821	CV_up_colon
chr3	141934711	141935816	CV_up_colon
chr3	141937322	141937847	CV_up_colon
chr3	141945614	141946240	CV_up_colon
chr3	141957783	141958547	CV_up_colon
chr3	141980957	141981659	CV_up_colon
chr3	141984773	141985320	CV_up_colon
chr3	142001803	142003442	CV_up_colon
chr3	142011469	142012728	CV_up_colon
chr3	142035473	142036118	CV_up_colon
chr3	142057442	142059474	CV_up_colon
chr3	142102205	142103358	CV_up_colon
chr3	142105860	142106802	CV_up_colon
chr3	142116905	142117612	CV_up_colon
chr3	142121575	142122207	CV_up_colon
chr3	142129121	142130087	CV_up_colon
chr3	142136671	142137837	CV_up_colon
chr3	142153148	142154092	CV_up_colon
chr3	153575200	153577189	CV_up_colon
chr3	153579966	153580757	CV_up_colon
chr3	153605731	153608432	CV_up_colon
chr4	9383489	9384278	CV_up_colon
chr4	9440665	9441332	CV_up_colon
chr4	9457303	9458271	CV_up_colon
chr4	9533109	9534605	CV_up_colon
chr4	9542751	9543519	CV_up_colon
chr4	9587984	9588714	CV_up_colon
chr4	9592692	9593226	CV_up_colon
chr4	9595418	9597298	CV_up_colon
chr4	9696784	9698776	CV_up_colon
chr4	9707178	9709054	CV_up_colon
chr4	9752109	9753638	CV_up_colon
chr4	33068252	33072088	CV_up_colon
chr4	33093017	33093789	CV_up_colon
chr4	33105246	33105892	CV_up_colon
chr4	40719683	40720667	CV_up_colon
chr4	40721047	40722964	CV_up_colon
chr4	40745671	40747219	CV_up_colon
chr4	40765113	40765964	CV_up_colon
chr4	40784354	40785120	CV_up_colon
chr4	40793320	40794662	CV_up_colon
chr4	40798647	40802405	CV_up_colon
chr4	40815658	40816665	CV_up_colon
chr4	40820725	40822445	CV_up_colon
chr4	40823551	40825038	CV_up_colon
chr4	40848523	40849750	CV_up_colon
chr4	40854378	40856477	CV_up_colon
chr4	40861458	40862098	CV_up_colon
chr4	41701550	41703423	CV_up_colon
chr4	41706784	41708049	CV_up_colon
chr4	41780753	41781139	CV_up_colon
chr4	42041430	42042221	CV_up_colon
chr4	43454624	43457681	CV_up_colon
chr4	43775827	43777028	CV_up_colon
chr4	43836669	43837273	CV_up_colon
chr4	63070301	63072909	CV_up_colon
chr4	63078072	63080465	CV_up_colon
chr4	63121965	63123279	CV_up_colon
chr4	63140915	63142326	CV_up_colon
chr4	63154551	63158441	CV_up_colon
chr4	63169142	63169955	CV_up_colon
chr4	97148506	97149255	CV_up_colon
chr4	97152747	97154502	CV_up_colon
chr4	97172162	97172836	CV_up_colon
chr4	97209740	97211162	CV_up_colon
chr4	115315561	115317034	CV_up_colon
chr4	115317527	115318645	CV_up_colon
chr4	115320027	115320864	CV_up_colon
chr4	115329572	115330730	CV_up_colon
chr4	115331629	115332483	CV_up_colon
chr4	115376553	115377901	CV_up_colon
chr4	115382192	115383145	CV_up_colon
chr4	115404092	115405640	CV_up_colon
chr4	128559303	128562231	CV_up_colon
chr4	128585652	128586495	CV_up_colon
chr4	128589091	128589855	CV_up_colon
chr4	128594289	128594806	CV_up_colon
chr4	128596245	128596864	CV_up_colon
chr4	128601755	128603255	CV_up_colon
chr4	128604329	128605123	CV_up_colon
chr4	128623576	128625112	CV_up_colon
chr4	128626592	128627499	CV_up_colon
chr4	128634211	128635330	CV_up_colon
chr4	128639167	128640437	CV_up_colon
chr4	130125039	130127125	CV_up_colon
chr4	130130318	130131639	CV_up_colon
chr4	130137250	130139139	CV_up_colon
chr4	130144240	130146192	CV_up_colon
chr4	130165017	130165913	CV_up_colon
chr4	130167134	130168288	CV_up_colon
chr4	130178744	130180253	CV_up_colon
chr4	130184841	130185732	CV_up_colon
chr4	130193538	130194439	CV_up_colon
chr4	130218417	130220631	CV_up_colon
chr4	130261985	130263239	CV_up_colon
chr4	130270771	130271444	CV_up_colon
chr4	130294395	130294891	CV_up_colon
chr4	132841911	132843072	CV_up_colon
chr4	132853291	132854286	CV_up_colon
chr4	132857561	132858436	CV_up_colon
chr4	132863196	132863900	CV_up_colon
chr4	132865706	132866388	CV_up_colon
chr4	132870645	132871585	CV_up_colon
chr4	132878455	132879127	CV_up_colon
chr4	132893846	132895957	CV_up_colon
chr4	132908648	132910387	CV_up_colon
chr4	137864819	137865322	CV_up_colon
chr4	137867286	137867992	CV_up_colon
chr4	137874398	137875863	CV_up_colon
chr4	137881153	137882740	CV_up_colon
chr4	137898421	137899953	CV_up_colon
chr4	137900651	137901830	CV_up_colon
chr4	137919317	137920051	CV_up_colon
chr4	147525121	147526548	CV_up_colon
chr4	147978686	147979393	CV_up_colon
chr4	147996469	147997006	CV_up_colon
chr4	147999847	148001640	CV_up_colon
chr4	148017676	148018691	CV_up_colon
chr4	148020616	148021288	CV_up_colon
chr4	148024942	148025723	CV_up_colon
chr4	148036023	148038832	CV_up_colon
chr4	148054497	148056259	CV_up_colon
chr4	148059520	148062005	CV_up_colon
chr4	148063886	148064697	CV_up_colon
chr4	148065061	148065939	CV_up_colon
chr4	148071834	148073504	CV_up_colon
chr4	148078651	148079882	CV_up_colon
chr4	148085328	148090186	CV_up_colon
chr4	148111592	148114386	CV_up_colon
chr4	148116486	148118027	CV_up_colon
chr4	148126462	148128332	CV_up_colon
chr4	148132872	148133429	CV_up_colon
chr4	148148707	148149350	CV_up_colon
chr4	148154078	148155112	CV_up_colon
chr4	148158929	148160919	CV_up_colon
chr4	148164974	148165672	CV_up_colon
chr4	148171331	148172597	CV_up_colon
chr4	148178026	148181967	CV_up_colon
chr4	148192007	148195322	CV_up_colon
chr4	148204421	148205054	CV_up_colon
chr4	148206483	148208662	CV_up_colon
chr4	148211235	148213136	CV_up_colon
chr4	148231285	148234184	CV_up_colon
chr4	148256639	148257677	CV_up_colon
[truncated: 735 more rows]

## Sheet: up in CR colon
TABLE S9: Genome coordinates of DHS within the regulatory domain of genes with differential expression between microbiota colonization states (higher expression in CR colon).
chrom	start	stop	category
chr1	36305775	36306317	CR_up_colon
chr1	36308196	36308814	CR_up_colon
chr1	36309567	36310148	CR_up_colon
chr1	36311380	36312460	CR_up_colon
chr1	36320818	36322738	CR_up_colon
chr1	36327274	36330876	CR_up_colon
chr1	36331033	36333632	CR_up_colon
chr1	36334032	36334736	CR_up_colon
chr1	36335963	36336601	CR_up_colon
chr1	39252971	39254442	CR_up_colon
chr1	39260902	39262309	CR_up_colon
chr1	39262453	39263226	CR_up_colon
chr1	39263578	39264237	CR_up_colon
chr1	39291597	39292676	CR_up_colon
chr1	39294227	39295456	CR_up_colon
chr1	39297640	39298661	CR_up_colon
chr1	39309461	39311130	CR_up_colon
chr1	39313307	39313816	CR_up_colon
chr1	39316312	39317311	CR_up_colon
chr1	39337216	39338384	CR_up_colon
chr1	39387480	39388639	CR_up_colon
chr1	39396137	39398023	CR_up_colon
chr1	39405879	39406359	CR_up_colon
chr1	39423721	39426551	CR_up_colon
chr1	39448548	39449635	CR_up_colon
chr1	39464966	39466421	CR_up_colon
chr1	39466781	39467757	CR_up_colon
chr1	39474398	39475340	CR_up_colon
chr1	39514747	39515875	CR_up_colon
chr1	39525745	39526278	CR_up_colon
chr1	39534192	39536957	CR_up_colon
chr1	64751723	64752344	CR_up_colon
chr1	64763979	64764582	CR_up_colon
chr1	64781186	64786070	CR_up_colon
chr1	64789065	64790636	CR_up_colon
chr1	64801001	64801818	CR_up_colon
chr1	64802545	64804777	CR_up_colon
chr1	64833233	64835135	CR_up_colon
chr1	64835904	64837291	CR_up_colon
chr1	64843714	64844732	CR_up_colon
chr1	64855409	64856351	CR_up_colon
chr1	64870688	64871368	CR_up_colon
chr1	64872881	64873513	CR_up_colon
chr1	64877614	64878831	CR_up_colon
chr1	64892426	64892944	CR_up_colon
chr1	64893414	64895121	CR_up_colon
chr1	64897213	64898469	CR_up_colon
chr1	64898710	64899484	CR_up_colon
chr1	64906413	64907588	CR_up_colon
chr1	64964447	64966313	CR_up_colon
chr1	64988467	64989472	CR_up_colon
chr1	66986141	66988398	CR_up_colon
chr1	88326259	88326982	CR_up_colon
chr1	88329615	88331761	CR_up_colon
chr1	88336349	88341062	CR_up_colon
chr1	88366800	88368312	CR_up_colon
chr1	88368447	88369959	CR_up_colon
chr1	88383581	88384751	CR_up_colon
chr1	88393819	88395308	CR_up_colon
chr1	88399722	88402406	CR_up_colon
chr1	88405887	88406495	CR_up_colon
chr1	88421106	88426304	CR_up_colon
chr1	88428268	88429643	CR_up_colon
chr1	120284572	120287800	CR_up_colon
chr1	120354448	120356733	CR_up_colon
chr1	120373067	120373945	CR_up_colon
chr1	120389343	120389810	CR_up_colon
chr1	120394247	120395394	CR_up_colon
chr1	120468084	120469185	CR_up_colon
chr1	120491194	120493130	CR_up_colon
chr1	120493991	120496263	CR_up_colon
chr1	120519153	120520190	CR_up_colon
chr1	120523637	120525337	CR_up_colon
chr1	120526297	120527316	CR_up_colon
chr1	120532503	120533009	CR_up_colon
chr1	120539234	120540788	CR_up_colon
chr1	120544333	120545307	CR_up_colon
chr1	120546155	120547934	CR_up_colon
chr1	120586253	120587210	CR_up_colon
chr1	120642002	120644017	CR_up_colon
chr1	120654760	120656701	CR_up_colon
chr1	120664549	120666352	CR_up_colon
chr1	120668582	120669352	CR_up_colon
chr1	120720723	120724217	CR_up_colon
chr1	120774404	120776336	CR_up_colon
chr1	120777000	120778151	CR_up_colon
chr1	120809592	120811902	CR_up_colon
chr1	120812908	120813617	CR_up_colon
chr1	120849373	120850058	CR_up_colon
chr1	120850338	120854485	CR_up_colon
chr1	120854834	120856064	CR_up_colon
chr1	120862827	120863699	CR_up_colon
chr1	120871913	120872582	CR_up_colon
chr1	120897291	120899039	CR_up_colon
chr1	120918557	120920124	CR_up_colon
chr1	120920577	120922011	CR_up_colon
chr1	120928627	120929191	CR_up_colon
chr1	120944131	120945542	CR_up_colon
chr1	120947268	120951029	CR_up_colon
chr1	176142364	176142921	CR_up_colon
chr1	177810197	177812423	CR_up_colon
chr1	177853800	177854404	CR_up_colon
chr1	177866265	177867329	CR_up_colon
chr1	177881597	177882665	CR_up_colon
chr1	177887436	177887924	CR_up_colon
chr1	177972901	177973649	CR_up_colon
chr1	178007928	178009719	CR_up_colon
chr1	178012169	178013172	CR_up_colon
chr1	178055147	178056607	CR_up_colon
chr1	178152989	178153841	CR_up_colon
chr1	178154491	178155309	CR_up_colon
chr1	178203850	178206105	CR_up_colon
chr1	187186313	187188464	CR_up_colon
chr1	187227781	187228302	CR_up_colon
chr1	187236828	187237785	CR_up_colon
chr1	187254950	187256868	CR_up_colon
chr1	187272244	187274044	CR_up_colon
chr1	187278035	187280088	CR_up_colon
chr1	187291393	187292112	CR_up_colon
chr1	187307061	187308542	CR_up_colon
chr1	187311784	187312469	CR_up_colon
chr1	187325810	187326973	CR_up_colon
chr1	187332769	187333576	CR_up_colon
chr1	187339384	187340761	CR_up_colon
chr1	187341404	187341821	CR_up_colon
chr1	187505619	187506845	CR_up_colon
chr1	187508394	187508933	CR_up_colon
chr1	187939958	187941610	CR_up_colon
chr10	68674360	68677189	CR_up_colon
chr10	68682704	68683648	CR_up_colon
chr10	68715866	68717729	CR_up_colon
chr10	68767341	68770389	CR_up_colon
chr10	68783473	68785132	CR_up_colon
chr10	68813767	68816195	CR_up_colon
chr10	68834108	68834721	CR_up_colon
chr10	68860839	68863663	CR_up_colon
chr10	68914798	68915767	CR_up_colon
chr10	95413448	95414178	CR_up_colon
chr10	95432999	95434337	CR_up_colon
chr10	95478165	95479190	CR_up_colon
chr10	95496083	95496719	CR_up_colon
chr10	95510640	95511787	CR_up_colon
chr10	95537670	95538681	CR_up_colon
chr10	95539956	95540676	CR_up_colon
chr10	95543060	95544017	CR_up_colon
chr10	95551861	95552946	CR_up_colon
chr10	95559331	95559860	CR_up_colon
chr10	95560490	95560965	CR_up_colon
chr10	95569487	95570912	CR_up_colon
chr10	95586905	95587942	CR_up_colon
chr10	95588083	95589321	CR_up_colon
chr10	95593987	95595316	CR_up_colon
chr10	95643477	95644830	CR_up_colon
chr10	95663229	95664529	CR_up_colon
chr10	95676194	95677163	CR_up_colon
chr10	95683142	95684159	CR_up_colon
chr10	95692884	95693648	CR_up_colon
chr10	95701383	95702074	CR_up_colon
chr10	95857393	95858498	CR_up_colon
chr10	95859697	95862081	CR_up_colon
chr10	95863098	95863966	CR_up_colon
chr10	95868757	95869575	CR_up_colon
chr10	95900485	95902071	CR_up_colon
chr10	95902296	95903160	CR_up_colon
chr10	95941807	95942713	CR_up_colon
chr10	95977164	95979375	CR_up_colon
chr10	95990218	95991146	CR_up_colon
chr10	95996962	95998498	CR_up_colon
chr10	96037006	96038278	CR_up_colon
chr10	96078574	96081334	CR_up_colon
chr10	96086918	96088690	CR_up_colon
chr10	96090919	96091477	CR_up_colon
chr10	96123878	96124916	CR_up_colon
chr10	96125474	96126421	CR_up_colon
chr10	96145756	96146639	CR_up_colon
chr10	96148287	96150245	CR_up_colon
chr10	96152693	96154748	CR_up_colon
chr10	96156384	96158136	CR_up_colon
chr10	96184579	96185818	CR_up_colon
chr10	96186861	96188549	CR_up_colon
chr10	96192786	96193553	CR_up_colon
chr10	96213458	96213941	CR_up_colon
chr10	96214059	96214926	CR_up_colon
chr10	96246414	96247587	CR_up_colon
chr10	96249654	96250588	CR_up_colon
chr10	96284502	96286242	CR_up_colon
chr10	96338815	96339871	CR_up_colon
chr10	96386539	96389330	CR_up_colon
chr10	96397226	96397739	CR_up_colon
chr10	96443653	96444886	CR_up_colon
chr10	96500347	96501662	CR_up_colon
chr10	96541920	96543087	CR_up_colon
chr10	96613202	96613874	CR_up_colon
chr10	96620720	96623451	CR_up_colon
chr10	96623488	96624041	CR_up_colon
chr10	96682089	96683642	CR_up_colon
chr10	96710552	96711865	CR_up_colon
chr10	96767258	96767915	CR_up_colon
chr10	96774354	96776866	CR_up_colon
chr10	96802376	96803510	CR_up_colon
chr10	96807933	96808501	CR_up_colon
chr10	96838414	96838905	CR_up_colon
chr10	98576655	98577608	CR_up_colon
chr10	98579905	98581164	CR_up_colon
chr10	98581235	98581863	CR_up_colon
chr10	98589394	98590976	CR_up_colon
chr10	98593358	98594413	CR_up_colon
chr10	98594791	98597243	CR_up_colon
chr10	98614192	98615235	CR_up_colon
chr10	98627451	98629329	CR_up_colon
chr10	98631099	98632763	CR_up_colon
chr10	98651286	98652727	CR_up_colon
chr10	98664444	98665425	CR_up_colon
chr10	98666102	98667604	CR_up_colon
chr10	98671443	98672571	CR_up_colon
chr10	98673130	98675438	CR_up_colon
chr10	98684606	98685944	CR_up_colon
chr10	98699798	98700507	CR_up_colon
chr10	98704144	98705252	CR_up_colon
chr10	98706018	98708013	CR_up_colon
chr10	98723657	98727588	CR_up_colon
chr10	98732930	98734386	CR_up_colon
chr10	98739413	98740004	CR_up_colon
chr10	98755506	98756323	CR_up_colon
chr10	98760943	98762367	CR_up_colon
chr10	98785794	98786701	CR_up_colon
chr10	98815567	98817510	CR_up_colon
chr10	98871993	98872921	CR_up_colon
chr10	98903539	98904234	CR_up_colon
chr10	98915372	98915847	CR_up_colon
chr10	98922425	98923147	CR_up_colon
chr10	98923381	98924612	CR_up_colon
chr10	98974217	98975052	CR_up_colon
chr10	99036381	99037218	CR_up_colon
chr10	99039714	99040578	CR_up_colon
chr10	99054715	99055146	CR_up_colon
chr10	99061945	99062369	CR_up_colon
chr10	99078223	99078905	CR_up_colon
chr10	99081582	99082711	CR_up_colon
chr10	99104335	99105576	CR_up_colon
chr10	99114558	99115189	CR_up_colon
chr10	99188028	99189018	CR_up_colon
chr10	99223389	99224280	CR_up_colon
chr10	99303559	99304624	CR_up_colon
chr10	99306230	99307637	CR_up_colon
chr10	99354229	99355097	CR_up_colon
chr10	99356458	99357100	CR_up_colon
chr10	99364659	99365832	CR_up_colon
chr10	99375488	99376706	CR_up_colon
chr10	99380904	99382131	CR_up_colon
chr10	99385097	99385736	CR_up_colon
chr10	99435304	99436263	CR_up_colon
chr10	99443205	99445009	CR_up_colon
chr10	99472484	99473678	CR_up_colon
chr10	119645488	119647508	CR_up_colon
chr10	119656922	119657445	CR_up_colon
chr10	119663710	119665607	CR_up_colon
chr10	119670776	119671421	CR_up_colon
chr10	119684309	119684948	CR_up_colon
chr10	119694172	119694845	CR_up_colon
chr10	119707717	119708715	CR_up_colon
chr10	119742843	119743744	CR_up_colon
chr10	119751327	119752699	CR_up_colon
chr10	119766362	119767420	CR_up_colon
chr10	119805947	119807268	CR_up_colon
chr10	119823916	119824905	CR_up_colon
chr10	119827941	119830918	CR_up_colon
chr10	119835507	119836544	CR_up_colon
chr10	119837518	119838281	CR_up_colon
chr10	119849230	119849725	CR_up_colon
chr10	119854206	119856641	CR_up_colon
chr10	119858968	119860243	CR_up_colon
chr10	119865086	119866843	CR_up_colon
chr10	119910916	119915928	CR_up_colon
chr11	3409600	3410210	CR_up_colon
chr11	3410985	3411665	CR_up_colon
chr11	3414261	3416633	CR_up_colon
chr11	3434940	3436440	CR_up_colon
chr11	3436809	3437321	CR_up_colon
chr11	20344840	20346433	CR_up_colon
chr11	20352615	20356719	CR_up_colon
chr11	20361802	20363856	CR_up_colon
chr11	20369206	20369930	CR_up_colon
chr11	20371654	20372308	CR_up_colon
chr11	20377033	20378242	CR_up_colon
chr11	26701502	26703368	CR_up_colon
chr11	48807409	48808337	CR_up_colon
chr11	48819933	48820741	CR_up_colon
chr11	48863816	48865380	CR_up_colon
chr11	48891938	48892624	CR_up_colon
chr11	48901311	48902264	CR_up_colon
chr11	48902370	48903251	CR_up_colon
chr11	48916440	48917581	CR_up_colon
chr11	48921012	48921990	CR_up_colon
chr11	48941366	48942554	CR_up_colon
chr11	48967583	48969092	CR_up_colon
chr11	48982434	48983310	CR_up_colon
chr11	57992805	57993608	CR_up_colon
chr11	57996337	57997897	CR_up_colon
chr11	58027421	58029127	CR_up_colon
chr11	58030915	58031799	CR_up_colon
chr11	58038959	58039601	CR_up_colon
chr11	58046242	58046775	CR_up_colon
chr11	58052451	58053472	CR_up_colon
chr11	58060656	58061390	CR_up_colon
chr11	58063875	58064524	CR_up_colon
chr11	58086591	58087421	CR_up_colon
chr11	58114466	58116818	CR_up_colon
chr11	62664490	62666388	CR_up_colon
chr11	62671693	62672278	CR_up_colon
chr11	62692154	62694604	CR_up_colon
chr11	62715090	62715843	CR_up_colon
chr11	62728033	62728456	CR_up_colon
chr11	62734386	62735869	CR_up_colon
chr11	62743071	62743952	CR_up_colon
chr11	62758738	62759707	CR_up_colon
chr11	74709430	74712179	CR_up_colon
chr11	74714511	74716789	CR_up_colon
chr11	78815523	78818101	CR_up_colon
chr11	78827025	78827563	CR_up_colon
chr11	78832480	78834994	CR_up_colon
chr11	78842540	78845496	CR_up_colon
chr11	78870399	78872918	CR_up_colon
chr11	78875206	78876212	CR_up_colon
chr11	78877689	78878229	CR_up_colon
chr11	78899591	78901026	CR_up_colon
chr11	78925049	78928539	CR_up_colon
chr11	78945138	78946622	CR_up_colon
chr11	78947719	78949670	CR_up_colon
chr11	78958061	78960487	CR_up_colon
chr11	78979535	78980856	CR_up_colon
chr11	78996574	78997458	CR_up_colon
chr11	79001501	79003036	CR_up_colon
chr11	79005659	79006146	CR_up_colon
chr11	79027091	79028088	CR_up_colon
chr11	79030366	79031227	CR_up_colon
chr11	79037806	79038789	CR_up_colon
chr11	79042321	79045446	CR_up_colon
chr11	79066489	79069036	CR_up_colon
chr11	82728277	82729036	CR_up_colon
chr11	82743519	82748039	CR_up_colon
chr11	82764313	82766719	CR_up_colon
chr11	82773064	82773592	CR_up_colon
chr11	82784296	82785395	CR_up_colon
chr11	82803374	82805913	CR_up_colon
chr11	82988139	82989689	CR_up_colon
chr11	83516752	83518339	CR_up_colon
chr11	83522091	83522863	CR_up_colon
chr11	83530483	83531275	CR_up_colon
chr11	83542007	83542862	CR_up_colon
chr11	83552577	83553242	CR_up_colon
chr11	93822792	93823243	CR_up_colon
chr11	93824295	93824752	CR_up_colon
chr11	93828577	93830375	CR_up_colon
chr11	93848657	93849761	CR_up_colon
chr11	93855720	93859220	CR_up_colon
chr11	93948274	93948726	CR_up_colon
chr11	93989201	93989758	CR_up_colon
chr11	93990835	93991496	CR_up_colon
chr11	93993995	93996293	CR_up_colon
chr11	93998054	93999939	CR_up_colon
chr11	94004467	94005196	CR_up_colon
chr11	94005959	94007118	CR_up_colon
chr11	94019601	94021329	CR_up_colon
chr11	94021432	94023199	CR_up_colon
chr11	94023264	94023972	CR_up_colon
chr11	94024190	94025713	CR_up_colon
chr11	94032915	94034228	CR_up_colon
chr11	94054256	94054955	CR_up_colon
chr11	94063337	94064195	CR_up_colon
chr11	94070939	94074206	CR_up_colon
chr11	94086976	94087936	CR_up_colon
chr11	94097196	94097937	CR_up_colon
chr11	97642965	97644339	CR_up_colon
chr11	100478921	100481742	CR_up_colon
chr11	100483885	100484892	CR_up_colon
chr11	100485037	100485711	CR_up_colon
chr11	100487408	100489156	CR_up_colon
chr11	100501184	100502565	CR_up_colon
chr11	102915820	102916618	CR_up_colon
chr11	102954575	102957012	CR_up_colon
chr11	102957845	102959166	CR_up_colon
chr11	102962375	102965258	CR_up_colon
chr12	17190674	17191736	CR_up_colon
chr12	17201820	17203628	CR_up_colon
chr12	17228544	17229536	CR_up_colon
chr12	17259200	17260525	CR_up_colon
chr12	17263454	17264302	CR_up_colon
chr12	17272605	17274777	CR_up_colon
chr12	17330339	17332332	CR_up_colon
chr12	36683840	36684228	CR_up_colon
chr12	36692346	36693900	CR_up_colon
chr12	36708000	36708844	CR_up_colon
chr12	36711212	36711916	CR_up_colon
chr12	36718848	36721110	CR_up_colon
chr12	36722339	36722813	CR_up_colon
chr12	36733859	36736129	CR_up_colon
chr12	36750338	36750923	CR_up_colon
chr12	36767231	36769818	CR_up_colon
chr12	76716381	76717717	CR_up_colon
chr12	76723418	76724906	CR_up_colon
chr12	76757557	76757981	CR_up_colon
chr12	76764580	76765313	CR_up_colon
chr12	76769804	76771781	CR_up_colon
chr12	76772619	76773349	CR_up_colon
chr12	76807399	76808354	CR_up_colon
chr12	76834629	76837205	CR_up_colon
chr12	81373920	81374816	CR_up_colon
chr12	81399634	81400808	CR_up_colon
chr12	81419553	81420538	CR_up_colon
chr12	81430287	81431401	CR_up_colon
chr12	81432466	81433374	CR_up_colon
chr12	81448831	81449425	CR_up_colon
chr12	81466900	81468009	CR_up_colon
chr12	81480339	81481238	CR_up_colon
chr12	81489731	81490286	CR_up_colon
chr12	81490401	81490920	CR_up_colon
chr12	81535489	81538693	CR_up_colon
chr12	86628756	86631008	CR_up_colon
chr12	86645950	86647423	CR_up_colon
chr12	86679337	86681361	CR_up_colon
chr12	86701705	86703923	CR_up_colon
chr12	86714653	86716325	CR_up_colon
chr12	110780801	110781979	CR_up_colon
chr12	110985739	110988945	CR_up_colon
chr13	28263016	28264276	CR_up_colon
chr13	28386815	28387346	CR_up_colon
chr13	28406730	28407476	CR_up_colon
chr13	28492225	28493291	CR_up_colon
chr13	28508780	28510447	CR_up_colon
chr13	28575379	28576526	CR_up_colon
chr13	28607114	28607680	CR_up_colon
chr13	28611197	28612346	CR_up_colon
chr13	28617540	28618603	CR_up_colon
chr13	28623533	28624665	CR_up_colon
chr13	28720154	28723229	CR_up_colon
chr13	28727215	28727826	CR_up_colon
chr13	28848674	28850761	CR_up_colon
chr13	28862354	28863410	CR_up_colon
chr13	28976004	28977640	CR_up_colon
chr13	29009245	29010278	CR_up_colon
chr13	29039550	29040882	CR_up_colon
chr13	29042113	29046461	CR_up_colon
chr13	29049551	29052133	CR_up_colon
chr13	29080172	29081940	CR_up_colon
chr13	29083160	29085044	CR_up_colon
chr13	29125917	29127223	CR_up_colon
chr13	29150325	29151211	CR_up_colon
chr13	29183769	29184415	CR_up_colon
chr13	29248260	29249393	CR_up_colon
chr13	29253870	29256096	CR_up_colon
chr13	29269709	29270823	CR_up_colon
chr13	29301564	29303297	CR_up_colon
chr13	29376509	29377973	CR_up_colon
chr13	29489771	29493039	CR_up_colon
chr13	29512803	29513623	CR_up_colon
chr13	29593807	29596304	CR_up_colon
chr13	29696058	29696831	CR_up_colon
chr13	29720453	29720950	CR_up_colon
chr13	29733972	29734975	CR_up_colon
chr13	29752085	29752976	CR_up_colon
chr13	29771144	29773196	CR_up_colon
chr13	29805245	29805935	CR_up_colon
chr13	29825513	29826209	CR_up_colon
chr13	29829218	29831332	CR_up_colon
chr13	29837830	29839456	CR_up_colon
chr13	29861401	29861948	CR_up_colon
chr13	29878339	29879563	CR_up_colon
chr13	29927097	29927494	CR_up_colon
chr13	29930209	29930940	CR_up_colon
chr13	37495050	37495576	CR_up_colon
chr13	37518343	37519323	CR_up_colon
chr13	37525636	37527094	CR_up_colon
chr13	37538350	37539103	CR_up_colon
chr13	37542804	37545603	CR_up_colon
chr13	37548679	37549345	CR_up_colon
chr13	37551641	37552984	CR_up_colon
chr13	37557236	37558112	CR_up_colon
chr13	37559294	37560839	CR_up_colon
chr13	37569041	37571493	CR_up_colon
chr13	37583837	37585783	CR_up_colon
chr13	37597677	37602052	CR_up_colon
chr13	37616763	37618744	CR_up_colon
chr13	37633453	37634056	CR_up_colon
chr13	37638131	37639438	CR_up_colon
chr13	37648705	37649939	CR_up_colon
chr13	37651740	37655337	CR_up_colon
chr13	37669471	37670891	CR_up_colon
chr13	37678024	37679348	CR_up_colon
chr13	37683636	37684636	CR_up_colon
chr13	37711462	37712905	CR_up_colon
chr13	37716892	37718188	CR_up_colon
chr13	37736521	37737191	CR_up_colon
chr13	37742552	37743905	CR_up_colon
chr13	37748468	37749620	CR_up_colon
chr13	37757951	37760274	CR_up_colon
chr13	37762782	37763450	CR_up_colon
chr13	37777690	37778822	CR_up_colon
chr13	37797259	37798169	CR_up_colon
chr13	37804355	37805220	CR_up_colon
chr13	37806685	37809284	CR_up_colon
chr13	37820223	37821768	CR_up_colon
chr13	37823552	37824909	CR_up_colon
chr13	37842911	37844250	CR_up_colon
chr13	37852676	37854029	CR_up_colon
chr13	37868667	37871945	CR_up_colon
chr13	37873918	37874676	CR_up_colon
chr13	37876033	37876918	CR_up_colon
chr13	37890821	37892172	CR_up_colon
chr13	37892918	37895818	CR_up_colon
chr13	37916244	37920032	CR_up_colon
chr13	37922445	37923433	CR_up_colon
chr13	37924019	37926065	CR_up_colon
chr13	37938427	37939950	CR_up_colon
chr13	37945456	37946810	CR_up_colon
chr13	37949127	37950985	CR_up_colon
chr13	37958113	37959279	CR_up_colon
chr13	37970624	37972996	CR_up_colon
chr13	37974200	37975514	CR_up_colon
chr13	37984262	37985457	CR_up_colon
chr13	37987426	37988234	CR_up_colon
chr13	37990563	37991331	CR_up_colon
chr13	37995016	37995792	CR_up_colon
chr13	37999385	38001452	CR_up_colon
chr13	38033469	38035744	CR_up_colon
chr13	38035875	38036702	CR_up_colon
chr13	38037929	38039734	CR_up_colon
chr13	38050075	38050940	CR_up_colon
chr13	38054845	38056794	CR_up_colon
chr13	38061058	38061727	CR_up_colon
chr13	38062639	38063344	CR_up_colon
chr13	38084641	38086651	CR_up_colon
chr13	91360944	91362177	CR_up_colon
chr13	91362721	91364476	CR_up_colon
chr13	101555773	101556962	CR_up_colon
chr13	101557233	101558002	CR_up_colon
chr13	101601887	101603902	CR_up_colon
chr14	52390873	52391964	CR_up_colon
chr14	52413128	52414657	CR_up_colon
chr14	56290221	56291600	CR_up_colon
chr14	63739929	63743803	CR_up_colon
chr14	63749416	63749928	CR_up_colon
chr14	63750327	63751806	CR_up_colon
chr14	63776312	63776785	CR_up_colon
chr14	63782589	63784220	CR_up_colon
chr14	63790634	63791802	CR_up_colon
chr14	63795938	63797857	CR_up_colon
chr14	63804629	63805090	CR_up_colon
chr14	63809694	63811662	CR_up_colon
chr14	67383492	67384928	CR_up_colon
chr14	67403070	67404499	CR_up_colon
chr14	67410013	67411679	CR_up_colon
chr14	67429753	67430264	CR_up_colon
chr14	67485299	67488789	CR_up_colon
chr14	67491509	67492775	CR_up_colon
chr14	76518666	76519224	CR_up_colon
chr14	76521666	76522429	CR_up_colon
chr14	76549027	76550651	CR_up_colon
chr14	76551604	76553627	CR_up_colon
chr14	76592918	76593415	CR_up_colon
chr14	76615802	76618181	CR_up_colon
chr14	76622513	76623983	CR_up_colon
chr14	76652849	76655510	CR_up_colon
chr14	76665638	76666368	CR_up_colon
chr14	76670068	76671607	CR_up_colon
chr14	76690115	76691102	CR_up_colon
chr14	76691400	76692309	CR_up_colon
chr14	76695108	76696350	CR_up_colon
chr14	76709007	76710758	CR_up_colon
chr14	76711188	76711922	CR_up_colon
chr14	76725626	76726920	CR_up_colon
chr14	76813437	76816685	CR_up_colon
chr14	76820371	76821798	CR_up_colon
chr14	76866331	76867322	CR_up_colon
chr14	76873167	76873685	CR_up_colon
chr14	76879469	76880526	CR_up_colon
chr14	76883492	76884092	CR_up_colon
chr14	76887108	76889700	CR_up_colon
chr14	76903772	76904673	CR_up_colon
chr14	76905132	76907061	CR_up_colon
chr14	76919904	76921104	CR_up_colon
chr14	76927457	76928976	CR_up_colon
chr14	90298001	90299211	CR_up_colon
chr15	11901504	11902907	CR_up_colon
chr15	11924200	11926241	CR_up_colon
chr15	11939598	11941016	CR_up_colon
chr15	11969037	11970044	CR_up_colon
chr15	12014521	12015128	CR_up_colon
chr15	12021614	12022335	CR_up_colon
chr15	12040938	12041744	CR_up_colon
chr15	54401403	54404742	CR_up_colon
chr15	54410022	54410605	CR_up_colon
chr15	54444121	54445904	CR_up_colon
chr15	54446507	54447578	CR_up_colon
chr15	54456182	54456703	CR_up_colon
chr15	54457651	54458414	CR_up_colon
chr15	54509176	54510423	CR_up_colon
chr15	54523086	54525046	CR_up_colon
chr15	54576436	54578524	CR_up_colon
chr15	54599688	54600696	CR_up_colon
chr15	54611975	54612694	CR_up_colon
chr15	54641907	54643224	CR_up_colon
chr15	58701044	58702074	CR_up_colon
chr15	58703845	58705034	CR_up_colon
chr15	60907389	60908443	CR_up_colon
chr15	60927289	60928366	CR_up_colon
chr15	60933861	60934656	CR_up_colon
chr15	60986417	60987671	CR_up_colon
chr15	60988887	60990585	CR_up_colon
chr15	60992761	60994250	CR_up_colon
chr15	61000204	61001416	CR_up_colon
chr15	61090127	61091105	CR_up_colon
chr15	61128792	61129992	CR_up_colon
chr15	61174726	61175716	CR_up_colon
chr15	61196491	61197249	CR_up_colon
chr15	61232261	61232716	CR_up_colon
chr15	61247164	61247763	CR_up_colon
chr15	61268290	61268824	CR_up_colon
chr15	61277572	61278679	CR_up_colon
chr15	61281492	61282500	CR_up_colon
chr15	61313092	61314530	CR_up_colon
chr15	61334932	61335656	CR_up_colon
chr15	61337732	61338776	CR_up_colon
chr15	61359961	61360448	CR_up_colon
chr15	61363604	61365062	CR_up_colon
chr15	61367175	61368295	CR_up_colon
chr15	61371812	61373122	CR_up_colon
chr15	61449990	61452701	CR_up_colon
chr15	61548638	61551115	CR_up_colon
chr15	61621129	61622725	CR_up_colon
chr15	61625821	61626521	CR_up_colon
chr15	61629123	61629977	CR_up_colon
chr15	61631373	61632431	CR_up_colon
chr15	61691816	61692657	CR_up_colon
chr15	61704492	61705776	CR_up_colon
chr15	61709003	61709635	CR_up_colon
chr15	61736516	61737463	CR_up_colon
chr15	61744872	61745923	CR_up_colon
chr15	61770521	61771783	CR_up_colon
chr15	61814544	61815368	CR_up_colon
chr15	61815636	61821338	CR_up_colon
chr15	61868910	61870386	CR_up_colon
chr15	61873320	61874009	CR_up_colon
chr15	61886192	61887269	CR_up_colon
chr15	61910589	61911620	CR_up_colon
chr15	61929875	61931092	CR_up_colon
chr15	61943392	61944954	CR_up_colon
chr15	61945829	61947202	CR_up_colon
chr15	61949709	61950998	CR_up_colon
chr15	61959894	61961250	CR_up_colon
chr15	61968380	61969707	CR_up_colon
chr15	62009275	62010791	CR_up_colon
chr15	62037488	62038743	CR_up_colon
chr15	62043329	62044778	CR_up_colon
chr15	74509109	74510526	CR_up_colon
chr15	74532215	74532765	CR_up_colon
chr15	74538547	74540623	CR_up_colon
chr15	74702612	74704668	CR_up_colon
chr15	74711754	74712441	CR_up_colon
chr15	74713189	74714002	CR_up_colon
chr15	74714395	74715494	CR_up_colon
chr15	74720874	74724043	CR_up_colon
chr15	74726686	74727387	CR_up_colon
chr15	74749836	74750538	CR_up_colon
chr15	74753634	74754603	CR_up_colon
chr15	74760688	74762890	CR_up_colon
chr15	74765203	74766097	CR_up_colon
chr15	75944678	75945542	CR_up_colon
chr15	75947972	75950178	CR_up_colon
chr15	77530569	77531717	CR_up_colon
chr15	77553888	77555423	CR_up_colon
chr15	77557360	77558612	CR_up_colon
chr15	77558762	77559911	CR_up_colon
chr15	77570663	77572511	CR_up_colon
chr15	77580780	77581307	CR_up_colon
chr15	79962844	79964887	CR_up_colon
chr15	79970005	79972157	CR_up_colon
chr15	79987565	79992060	CR_up_colon
chr15	79999870	80000380	CR_up_colon
chr15	80003239	80005281	CR_up_colon
chr15	80019245	80020945	CR_up_colon
chr15	80021769	80025437	CR_up_colon
chr15	80038585	80039553	CR_up_colon
chr15	80055443	80056146	CR_up_colon
chr16	4199443	4200497	CR_up_colon
chr16	4212729	4215384	CR_up_colon
chr16	4267510	4268652	CR_up_colon
chr16	20516282	20518614	CR_up_colon
chr16	23550390	23551794	CR_up_colon
chr16	23608036	23610911	CR_up_colon
chr16	23625378	23626755	CR_up_colon
chr16	23833256	23834790	CR_up_colon
chr16	24363748	24364836	CR_up_colon
chr16	24376311	24377147	CR_up_colon
chr16	24392039	24395575	CR_up_colon
chr16	24396492	24397414	CR_up_colon
chr16	24398564	24399197	CR_up_colon
chr16	24403565	24404610	CR_up_colon
chr16	24412417	24413677	CR_up_colon
chr16	24433439	24434637	CR_up_colon
chr16	24439524	24440483	CR_up_colon
chr16	24447620	24448651	CR_up_colon
chr16	24449518	24450564	CR_up_colon
chr16	24467397	24468300	CR_up_colon
chr16	24469226	24469958	CR_up_colon
chr16	24489046	24491864	CR_up_colon
chr16	24516639	24518283	CR_up_colon
chr16	24575277	24575974	CR_up_colon
chr16	24622090	24623312	CR_up_colon
chr16	24626817	24627573	CR_up_colon
chr16	24711868	24713008	CR_up_colon
chr16	24766045	24766741	CR_up_colon
chr16	24801106	24801944	CR_up_colon
chr16	24828319	24829077	CR_up_colon
chr16	24846075	24846772	CR_up_colon
chr16	24846957	24847891	CR_up_colon
chr16	24874083	24874914	CR_up_colon
chr16	24881833	24882887	CR_up_colon
chr16	24891330	24892460	CR_up_colon
chr16	24900938	24903069	CR_up_colon
chr16	24930160	24931194	CR_up_colon
chr16	24932662	24933330	CR_up_colon
chr16	24969267	24970280	CR_up_colon
chr16	25026233	25026747	CR_up_colon
chr16	31943976	31945028	CR_up_colon
chr16	31947278	31949410	CR_up_colon
chr16	31998881	31999395	CR_up_colon
chr16	42955501	42956034	CR_up_colon
chr16	44629610	44632064	CR_up_colon
chr16	44643843	44644584	CR_up_colon
chr16	44648607	44649239	CR_up_colon
chr16	44665226	44667832	CR_up_colon
chr16	44687381	44689945	CR_up_colon
chr16	44691627	44692393	CR_up_colon
chr16	44692540	44693174	CR_up_colon
chr16	44697207	44699214	CR_up_colon
chr16	44700623	44701226	CR_up_colon
chr16	48811940	48812611	CR_up_colon
chr16	48826277	48827192	CR_up_colon
chr16	97717333	97718339	CR_up_colon
chr16	97719152	97720195	CR_up_colon
chr16	97726026	97727053	CR_up_colon
chr16	97732072	97733728	CR_up_colon
chr16	97735325	97736567	CR_up_colon
chr16	97750857	97751286	CR_up_colon
chr16	97755452	97758183	CR_up_colon
chr16	97814197	97816258	CR_up_colon
chr16	97816571	97817087	CR_up_colon
chr17	24277389	24279471	CR_up_colon
chr17	24288435	24289773	CR_up_colon
chr17	24299425	24301112	CR_up_colon
chr17	25980100	25982500	CR_up_colon
chr17	25997730	25999139	CR_up_colon
chr17	26000420	26001554	CR_up_colon
chr17	26002057	26003518	CR_up_colon
chr17	26004328	26006025	CR_up_colon
chr17	26011452	26013860	CR_up_colon
chr17	26030766	26031609	CR_up_colon
chr17	26048662	26049244	CR_up_colon
chr17	26053657	26054758	CR_up_colon
chr17	26055935	26057845	CR_up_colon
chr17	26077797	26081376	CR_up_colon
chr17	26087774	26089745	CR_up_colon
chr17	28689645	28690873	CR_up_colon
chr17	28692766	28694356	CR_up_colon
chr17	33812041	33812887	CR_up_colon
chr17	33821212	33823436	CR_up_colon
chr17	33834702	33835580	CR_up_colon
chr17	79280489	79282582	CR_up_colon
chr18	10617306	10618616	CR_up_colon
chr18	10635115	10635646	CR_up_colon
chr18	10666031	10666925	CR_up_colon
chr18	10705297	10707199	CR_up_colon
chr18	34197976	34198894	CR_up_colon
chr18	34212165	34213481	CR_up_colon
chr18	34239328	34240597	CR_up_colon
chr18	34262333	34263335	CR_up_colon
chr18	34268386	34269835	CR_up_colon
chr18	34312193	34312870	CR_up_colon
chr18	34316160	34316847	CR_up_colon
chr18	34322527	34323460	CR_up_colon
chr18	34379369	34381656	CR_up_colon
chr18	34383011	34384504	CR_up_colon
chr18	34406635	34407917	CR_up_colon
chr18	34418472	34419288	CR_up_colon
chr18	34445826	34447893	CR_up_colon
chr18	47536999	47538477	CR_up_colon
chr18	47585657	47586659	CR_up_colon
chr18	47590691	47591619	CR_up_colon
chr18	47592279	47592985	CR_up_colon
chr18	47598680	47599424	CR_up_colon
chr18	47600995	47601883	CR_up_colon
chr18	47602564	47603056	CR_up_colon
chr18	47603380	47604123	CR_up_colon
chr18	47610727	47611246	CR_up_colon
chr18	47611497	47612454	CR_up_colon
chr18	47612684	47614292	CR_up_colon
chr18	47652011	47653668	CR_up_colon
chr18	47654178	47656929	CR_up_colon
chr18	47685951	47686857	CR_up_colon
chr18	47774998	47775807	CR_up_colon
chr18	47790775	47791689	CR_up_colon
chr18	47849065	47849824	CR_up_colon
chr18	48401795	48402684	CR_up_colon
chr18	60515886	60516266	CR_up_colon
chr19	3718507	3721343	CR_up_colon
chr19	3743940	3744797	CR_up_colon
chr19	3752323	3753638	CR_up_colon
chr19	3766087	3769398	CR_up_colon
chr19	3770343	3770879	CR_up_colon
chr19	3773108	3773784	CR_up_colon
chr19	3814088	3815489	CR_up_colon
chr19	3832757	3834692	CR_up_colon
chr19	3842270	3843073	CR_up_colon
chr19	5422921	5426508	CR_up_colon
chr19	5437546	5438282	CR_up_colon
chr19	5442276	5442962	CR_up_colon
chr19	7568354	7570065	CR_up_colon
chr19	7580208	7581192	CR_up_colon
chr19	7603115	7604015	CR_up_colon
chr19	7631521	7633634	CR_up_colon
chr19	7654575	7656070	CR_up_colon
chr19	7680267	7683067	CR_up_colon
chr19	8736156	8739641	CR_up_colon
chr19	8752132	8755273	CR_up_colon
chr19	8757201	8757982	CR_up_colon
chr19	8758933	8759732	CR_up_colon
chr19	8762827	8763367	CR_up_colon
chr19	8769347	8770465	CR_up_colon
chr19	8787203	8788821	CR_up_colon
chr19	10273128	10273762	CR_up_colon
chr19	10277646	10279926	CR_up_colon
chr19	10293443	10294570	CR_up_colon
chr19	10314018	10315700	CR_up_colon
chr19	10397650	10398978	CR_up_colon
chr19	10407853	10408706	CR_up_colon
chr19	10433337	10435350	CR_up_colon
chr19	10438302	10438899	CR_up_colon
chr19	10449031	10450378	CR_up_colon
chr19	10462742	10465149	CR_up_colon
chr19	10476916	10478319	CR_up_colon
chr19	10509084	10512457	CR_up_colon
chr19	10523974	10524779	CR_up_colon
chr19	10530839	10533398	CR_up_colon
chr19	16203073	16203664	CR_up_colon
chr19	16206195	16208686	CR_up_colon
chr19	16212060	16212449	CR_up_colon
chr19	16242614	16243814	CR_up_colon
chr19	16261400	16263137	CR_up_colon
chr19	16289175	16290056	CR_up_colon
chr19	16292470	16292995	CR_up_colon
chr19	16331665	16332332	CR_up_colon
chr19	16332615	16336657	CR_up_colon
chr19	16341374	16342302	CR_up_colon
chr19	16359040	16360001	CR_up_colon
chr19	16400006	16400940	CR_up_colon
chr19	16401538	16402420	CR_up_colon
chr19	16404600	16405662	CR_up_colon
chr19	16414442	16415199	CR_up_colon
chr19	16432543	16433899	CR_up_colon
chr19	16447069	16449395	CR_up_colon
chr19	16450217	16452167	CR_up_colon
chr19	30628699	30629724	CR_up_colon
chr19	34622450	34622945	CR_up_colon
chr19	34624795	34625944	CR_up_colon
chr19	34631114	34631614	CR_up_colon
chr19	34647588	34649209	CR_up_colon
chr19	34671211	34674215	CR_up_colon
chr19	34675694	34677357	CR_up_colon
chr19	34711286	34711900	CR_up_colon
chr19	34714699	34716070	CR_up_colon
chr19	34736367	34737584	CR_up_colon
chr19	34740546	34741103	CR_up_colon
chr19	34747900	34748515	CR_up_colon
chr19	34759294	34759836	CR_up_colon
chr19	34765800	34766323	CR_up_colon
chr19	34770753	34771324	CR_up_colon
chr19	34772607	34773363	CR_up_colon
chr19	34786130	34787508	CR_up_colon
chr19	34820257	34822464	CR_up_colon
chr19	39004567	39006665	CR_up_colon
chr19	39050344	39051383	CR_up_colon
chr19	39061052	39062137	CR_up_colon
chr19	39076410	39077694	CR_up_colon
chr19	39079232	39080512	CR_up_colon
chr19	39081066	39081790	CR_up_colon
chr19	41890729	41891785	CR_up_colon
chr19	41903388	41906039	CR_up_colon
chr19	41910303	41910799	CR_up_colon
chr19	41912185	41912975	CR_up_colon
chr19	41913271	41913754	CR_up_colon
chr19	41921387	41923433	CR_up_colon
chr19	41924192	41924925	CR_up_colon
chr19	41931252	41932995	CR_up_colon
chr19	41935904	41936560	CR_up_colon
chr19	41950488	41951516	CR_up_colon
chr19	41969182	41971142	CR_up_colon
chr2	32091350	32093779	CR_up_colon
chr2	32113823	32117262	CR_up_colon
chr2	32138147	32138695	CR_up_colon
chr2	32142772	32145559	CR_up_colon
chr2	32162829	32164241	CR_up_colon
chr2	32166719	32169110	CR_up_colon
chr2	69659685	69661732	CR_up_colon
chr2	69694160	69695088	CR_up_colon
chr2	69698849	69700791	CR_up_colon
chr2	90190843	90192401	CR_up_colon
chr2	90235074	90235565	CR_up_colon
chr2	90269038	90270756	CR_up_colon
chr2	90314739	90315668	CR_up_colon
chr2	90318484	90319231	CR_up_colon
chr2	90320559	90321814	CR_up_colon
chr2	90327126	90328951	CR_up_colon
chr2	90329880	90331117	CR_up_colon
chr2	90331802	90333238	CR_up_colon
chr2	90334409	90335001	CR_up_colon
chr2	90336053	90337351	CR_up_colon
chr2	90337561	90338409	CR_up_colon
chr2	90341803	90342568	CR_up_colon
chr2	90381684	90383386	CR_up_colon
chr2	90393221	90395520	CR_up_colon
chr2	90405150	90406544	CR_up_colon
chr2	90419563	90421856	CR_up_colon
chr2	91104444	91106468	CR_up_colon
chr2	91118843	91119975	CR_up_colon
chr2	91121134	91122299	CR_up_colon
chr2	91126010	91126520	CR_up_colon
chr2	91151174	91151705	CR_up_colon
chr2	91161809	91163791	CR_up_colon
chr2	91166656	91167500	CR_up_colon
chr2	91168197	91169370	CR_up_colon
chr2	91188542	91191177	CR_up_colon
chr2	91203372	91204097	CR_up_colon
chr2	91227135	91228255	CR_up_colon
chr2	91280699	91281480	CR_up_colon
chr2	91284446	91285081	CR_up_colon
chr2	91289549	91290791	CR_up_colon
chr2	91292344	91293382	CR_up_colon
chr2	118615974	118617343	CR_up_colon
chr2	118639398	118640900	CR_up_colon
chr2	118671651	118673298	CR_up_colon
chr2	125014832	125015605	CR_up_colon
chr2	125040175	125040988	CR_up_colon
chr2	125072099	125074476	CR_up_colon
chr2	125077608	125078530	CR_up_colon
chr2	125084957	125085514	CR_up_colon
chr2	125104105	125105051	CR_up_colon
chr2	125108000	125108931	CR_up_colon
chr2	125167607	125169601	CR_up_colon
chr2	125187116	125188372	CR_up_colon
chr2	125254164	125255445	CR_up_colon
chr2	125317633	125319102	CR_up_colon
chr2	125327138	125328085	CR_up_colon
chr2	125330540	125333057	CR_up_colon
chr2	156181713	156182220	CR_up_colon
chr2	156217637	156219395	CR_up_colon
chr2	156226822	156227654	CR_up_colon
chr2	156242073	156243423	CR_up_colon
chr2	156245546	156248051	CR_up_colon
chr2	156248181	156248828	CR_up_colon
chr2	156257817	156259532	CR_up_colon
chr2	156664761	156668685	CR_up_colon
chr2	156676065	156676795	CR_up_colon
chr2	156687681	156690497	CR_up_colon
chr2	156699284	156700078	CR_up_colon
chr2	156710158	156711673	CR_up_colon
chr3	37538102	37540441	CR_up_colon
chr3	37541399	37542486	CR_up_colon
chr3	37548110	37548672	CR_up_colon
chr3	37552873	37553850	CR_up_colon
chr3	37554828	37556601	CR_up_colon
chr3	37565579	37566226	CR_up_colon
chr3	37571011	37571977	CR_up_colon
chr3	37585696	37586970	CR_up_colon
chr3	37603577	37604306	CR_up_colon
chr3	37605140	37605765	CR_up_colon
chr3	37621302	37624726	CR_up_colon
chr3	37626977	37628782	CR_up_colon
chr3	37645791	37647863	CR_up_colon
chr3	37656433	37658226	CR_up_colon
chr3	37659647	37660562	CR_up_colon
chr3	37668038	37668922	CR_up_colon
chr3	37686337	37689126	CR_up_colon
chr3	37713691	37714552	CR_up_colon
chr3	37758694	37760260	CR_up_colon
chr3	37797518	37798188	CR_up_colon
chr3	37805691	37807858	CR_up_colon
chr3	37834204	37836031	CR_up_colon
chr3	37851766	37852376	CR_up_colon
chr3	37857491	37857971	CR_up_colon
chr3	37877306	37877874	CR_up_colon
chr3	37932666	37933612	CR_up_colon
chr3	38014879	38016084	CR_up_colon
chr3	38026982	38028737	CR_up_colon
chr3	38033266	38033921	CR_up_colon
chr3	38100729	38101795	CR_up_colon
chr3	38119720	38121171	CR_up_colon
chr3	38125697	38127173	CR_up_colon
chr3	38154381	38155108	CR_up_colon
chr3	38306020	38306761	CR_up_colon
chr3	38309340	38310328	CR_up_colon
chr3	68807769	68810544	CR_up_colon
chr3	68829930	68830696	CR_up_colon
chr3	90329284	90331277	CR_up_colon
chr3	93297314	93298467	CR_up_colon
chr3	93309651	93311396	CR_up_colon
chr3	93323883	93326240	CR_up_colon
chr3	93326407	93327266	CR_up_colon
chr3	93350941	93352827	CR_up_colon
chr3	97984532	97985509	CR_up_colon
chr3	97996973	97997690	CR_up_colon
chr3	98001618	98002909	CR_up_colon
chr3	98027732	98028922	CR_up_colon
chr3	98030657	98031995	CR_up_colon
chr3	98053228	98054296	CR_up_colon
chr3	98057877	98059574	CR_up_colon
chr3	98063068	98064439	CR_up_colon
chr3	98070819	98071922	CR_up_colon
chr3	98078190	98079097	CR_up_colon
chr3	122606683	122607461	CR_up_colon
chr3	122620983	122621671	CR_up_colon
chr3	122626716	122628173	CR_up_colon
chr3	138173319	138174318	CR_up_colon
chr3	138176271	138177173	CR_up_colon
chr3	138188834	138191596	CR_up_colon
chr3	138272431	138273781	CR_up_colon
chr3	138306640	138308022	CR_up_colon
chr3	144627838	144629920	CR_up_colon
chr3	144634394	144635545	CR_up_colon
chr3	144643230	144644182	CR_up_colon
chr3	144651414	144651920	CR_up_colon
chr3	144655508	144656821	CR_up_colon
chr3	144659547	144660164	CR_up_colon
chr3	144667311	144667921	CR_up_colon
chr3	144689677	144690388	CR_up_colon
chr3	151379194	151379660	CR_up_colon
chr3	151412244	151413477	CR_up_colon
chr4	40719683	40720667	CR_up_colon
chr4	40721047	40722964	CR_up_colon
chr4	40745671	40747219	CR_up_colon
chr4	40765113	40765964	CR_up_colon
chr4	40784354	40785120	CR_up_colon
chr4	40793320	40794662	CR_up_colon
chr4	40798647	40802405	CR_up_colon
chr4	40815658	40816665	CR_up_colon
chr4	40820725	40822445	CR_up_colon
chr4	40823551	40825038	CR_up_colon
chr4	40848523	40849750	CR_up_colon
chr4	40854378	40856477	CR_up_colon
chr4	40861458	40862098	CR_up_colon
chr4	44095098	44095849	CR_up_colon
chr4	44096717	44098029	CR_up_colon
chr4	44116221	44117906	CR_up_colon
chr4	44121238	44121941	CR_up_colon
chr4	44122871	44124048	CR_up_colon
chr4	44125418	44127908	CR_up_colon
chr4	44128082	44129019	CR_up_colon
chr4	44132258	44133234	CR_up_colon
chr4	44174117	44174614	CR_up_colon
chr4	94222341	94223979	CR_up_colon
chr4	94268912	94270642	CR_up_colon
chr4	94280442	94281967	CR_up_colon
chr4	123593889	123596494	CR_up_colon
chr4	123616928	123617502	CR_up_colon
chr4	123621708	123622886	CR_up_colon
chr4	123626159	123626618	CR_up_colon
chr4	123626732	123627676	CR_up_colon
chr4	123633611	123635580	CR_up_colon
chr4	123667188	123669178	CR_up_colon
chr4	123779526	123780472	CR_up_colon
chr4	123796123	123798403	CR_up_colon
chr4	123810810	123812913	CR_up_colon
chr4	123819194	123820508	CR_up_colon
chr4	123894256	123895184	CR_up_colon
chr4	123905696	123906537	CR_up_colon
chr4	124035685	124036662	CR_up_colon
chr4	124154939	124155859	CR_up_colon
chr4	124271616	124273853	CR_up_colon
chr4	124322171	124324565	CR_up_colon
chr4	132070660	132071967	CR_up_colon
chr4	132073861	132074470	CR_up_colon
chr4	132079889	132081491	CR_up_colon
chr4	132085157	132085762	CR_up_colon
chr4	132088369	132089993	CR_up_colon
chr4	132091173	132092228	CR_up_colon
chr4	133951622	133953622	CR_up_colon
chr4	133956551	133959291	CR_up_colon
chr4	133985938	133987097	CR_up_colon
chr4	133993610	133994449	CR_up_colon
chr4	134010607	134012135	CR_up_colon
chr4	134023139	134025683	CR_up_colon
chr4	134033736	134034442	CR_up_colon
chr4	134036618	134037354	CR_up_colon
chr4	134038138	134038979	CR_up_colon
chr4	135607907	135609792	CR_up_colon
chr4	135624996	135626488	CR_up_colon
chr4	135626558	135627908	CR_up_colon
chr4	135636317	135639993	CR_up_colon
chr4	135645824	135646564	CR_up_colon
chr4	135672433	135673437	CR_up_colon
chr4	135690460	135691929	CR_up_colon
chr4	145053297	145054483	CR_up_colon
chr4	149586510	149587296	CR_up_colon
chr4	149594462	149595927	CR_up_colon
chr4	149610304	149612424	CR_up_colon
chr4	149613595	149614871	CR_up_colon
chr4	149621758	149622588	CR_up_colon
chr4	149631205	149632955	CR_up_colon
chr4	149646469	149647796	CR_up_colon
chr4	155565725	155567733	CR_up_colon
chr4	155569879	155572467	CR_up_colon
chr4	155576679	155578788	CR_up_colon
chr5	22054262	22056679	CR_up_colon
chr5	22094401	22095899	CR_up_colon
chr5	31245082	31245836	CR_up_colon
chr5	31247136	31248305	CR_up_colon
chr5	31251017	31253218	CR_up_colon
chr5	115309125	115309834	CR_up_colon
chr5	115325489	115326540	CR_up_colon
chr5	115346914	115348029	CR_up_colon
chr5	121199168	121200605	CR_up_colon
chr5	121226155	121228189	CR_up_colon
chr5	121242784	121243730	CR_up_colon
chr5	135662183	135664295	CR_up_colon
chr5	135667445	135667932	CR_up_colon
chr5	135712418	135712906	CR_up_colon
chr5	135724213	135727568	CR_up_colon
chr5	138069113	138072750	CR_up_colon
chr5	149766418	149769163	CR_up_colon
chr5	149770486	149772417	CR_up_colon
chr5	149780362	149781848	CR_up_colon
chr5	149805805	149807508	CR_up_colon
chr5	149817319	149819350	CR_up_colon
chr5	149825551	149827845	CR_up_colon
chr5	149842210	149844027	CR_up_colon
chr5	149862447	149865537	CR_up_colon
chr5	149890385	149892457	CR_up_colon
chr5	149994601	149997434	CR_up_colon
chr6	30121147	30126869	CR_up_colon
chr6	30155449	30156235	CR_up_colon
chr6	30158739	30159281	CR_up_colon
chr6	30160384	30163214	CR_up_colon
chr6	30180143	30180676	CR_up_colon
chr6	30202168	30203055	CR_up_colon
chr6	30250211	30251478	CR_up_colon
chr6	30252815	30254996	CR_up_colon
chr6	30257162	30259128	CR_up_colon
chr6	30261685	30262584	CR_up_colon
chr6	30282115	30282929	CR_up_colon
chr6	30286523	30287393	CR_up_colon
chr6	34730014	34731474	CR_up_colon
chr6	34812335	34813715	CR_up_colon
chr6	34815214	34816413	CR_up_colon
chr6	34818779	34819400	CR_up_colon
chr6	41554246	41557144	CR_up_colon
chr6	41569590	41571263	CR_up_colon
chr6	41585674	41586692	CR_up_colon
chr6	41612226	41612822	CR_up_colon
chr6	66123553	66124063	CR_up_colon
chr6	66311632	66312117	CR_up_colon
chr6	66332349	66333274	CR_up_colon
chr6	66351492	66352779	CR_up_colon
chr6	66484545	66486388	CR_up_colon
chr6	72478203	72479246	CR_up_colon
chr6	72483994	72484512	CR_up_colon
chr6	72485080	72485552	CR_up_colon
chr6	72488198	72489309	CR_up_colon
chr6	72498886	72500984	CR_up_colon
chr6	72502264	72503833	CR_up_colon
chr6	72515198	72516835	CR_up_colon
chr6	72533472	72534664	CR_up_colon
chr6	72540070	72540628	CR_up_colon
chr6	84987545	84988119	CR_up_colon
chr6	85018042	85019879	CR_up_colon
chr6	85036638	85038136	CR_up_colon
chr6	85067019	85068436	CR_up_colon
chr6	86751342	86751937	CR_up_colon
chr6	86753103	86754066	CR_up_colon
chr6	86756127	86757011	CR_up_colon
chr6	86766502	86767027	CR_up_colon
chr6	86786005	86787083	CR_up_colon
chr6	86791845	86792629	CR_up_colon
chr6	86798317	86800660	CR_up_colon
chr6	86803058	86804563	CR_up_colon
chr6	86822839	86823343	CR_up_colon
chr6	86871589	86872325	CR_up_colon
chr6	86896956	86899428	CR_up_colon
chr6	86928297	86929537	CR_up_colon
chr6	86952047	86953262	CR_up_colon
chr6	121160208	121162248	CR_up_colon
chr6	121195079	121196233	CR_up_colon
chr6	121204896	121206325	CR_up_colon
chr6	121210353	121211036	CR_up_colon
chr6	121221786	121223645	CR_up_colon
chr6	124778200	124780866	CR_up_colon
chr6	136241490	136244032	CR_up_colon
chr6	136265355	136265993	CR_up_colon
chr6	136303254	136304274	CR_up_colon
chr6	136355545	136356975	CR_up_colon
chr6	146590340	146592222	CR_up_colon
chr6	146599957	146600516	CR_up_colon
chr6	146604060	146604712	CR_up_colon
chr6	146611170	146611775	CR_up_colon
chr6	146612567	146614412	CR_up_colon
chr6	146633933	146635688	CR_up_colon
chr7	13873737	13874486	CR_up_colon
chr7	13898835	13901510	CR_up_colon
chr7	13904616	13905126	CR_up_colon
chr7	19733489	19735535	CR_up_colon
chr7	19741156	19742222	CR_up_colon
chr7	19742577	19743314	CR_up_colon
chr7	19744597	19746204	CR_up_colon
chr7	19748952	19750817	CR_up_colon
chr7	19812298	19814996	CR_up_colon
chr7	19817100	19817652	CR_up_colon
chr7	19820071	19822146	CR_up_colon
chr7	19824440	19825299	CR_up_colon
chr7	19826119	19826879	CR_up_colon
chr7	19842517	19843348	CR_up_colon
chr7	19850120	19852743	CR_up_colon
chr7	19854205	19858355	CR_up_colon
chr7	107335705	107337350	CR_up_colon
chr7	107375405	107377410	CR_up_colon
chr7	107382504	107383303	CR_up_colon
chr7	107387344	107387975	CR_up_colon
chr7	107428219	107428866	CR_up_colon
chr7	107431728	107432222	CR_up_colon
chr7	107433245	107434470	CR_up_colon
chr7	107436355	107437789	CR_up_colon
chr7	126874180	126874689	CR_up_colon
chr7	126883197	126883897	CR_up_colon
chr7	126887602	126888725	CR_up_colon
chr7	126903845	126905080	CR_up_colon
chr7	126905486	126906249	CR_up_colon
chr7	126910241	126911242	CR_up_colon
chr7	126915543	126916297	CR_up_colon
chr7	133768131	133770128	CR_up_colon
chr7	133773242	133773931	CR_up_colon
chr7	133774300	133775094	CR_up_colon
chr7	133777518	133778608	CR_up_colon
chr7	133780154	133781069	CR_up_colon
chr7	133785963	133786524	CR_up_colon
chr7	148171617	148172888	CR_up_colon
chr7	148194186	148197765	CR_up_colon
chr7	148557608	148558460	CR_up_colon
chr7	148565375	148566015	CR_up_colon
chr7	148574026	148575120	CR_up_colon
chr7	148576816	148579018	CR_up_colon
chr7	148580634	148581155	CR_up_colon
chr7	148594615	148595335	CR_up_colon
chr7	148599125	148600744	CR_up_colon
chr7	148604597	148605351	CR_up_colon
chr7	148615103	148615662	CR_up_colon
chr7	148620244	148622298	CR_up_colon
chr7	148622903	148623971	CR_up_colon
chr7	148628921	148630245	CR_up_colon
chr7	148632889	148633951	CR_up_colon
chr7	149023472	149026006	CR_up_colon
chr7	149064633	149065166	CR_up_colon
chr7	149086194	149086931	CR_up_colon
chr7	149087072	149089452	CR_up_colon
chr7	149110598	149111639	CR_up_colon
chr8	3514675	3517928	CR_up_colon
chr8	3535533	3537796	CR_up_colon
chr8	3559060	3559633	CR_up_colon
chr8	3566143	3568850	CR_up_colon
chr8	3579242	3580343	CR_up_colon
chr8	34627023	34628480	CR_up_colon
chr8	59989617	59991991	CR_up_colon
chr8	60009148	60010420	CR_up_colon
chr8	60042358	60043105	CR_up_colon
chr8	60048052	60048623	CR_up_colon
chr8	60053128	60053741	CR_up_colon
chr8	60054087	60056168	CR_up_colon
chr8	60058489	60059480	CR_up_colon
chr8	60067207	60068652	CR_up_colon
chr8	60072796	60073502	CR_up_colon
chr8	60074169	60074629	CR_up_colon
chr8	60078528	60079484	CR_up_colon
chr8	60080569	60082090	CR_up_colon
chr8	60093838	60094712	CR_up_colon
chr8	60102884	60103520	CR_up_colon
chr8	60127896	60129471	CR_up_colon
chr8	60130242	60134095	CR_up_colon
chr8	64387117	64388964	CR_up_colon
chr8	64399179	64399904	CR_up_colon
chr8	64402342	64402943	CR_up_colon
chr8	64403249	64403901	CR_up_colon
chr8	64406388	64407985	CR_up_colon
chr8	64471264	64472629	CR_up_colon
chr8	64480647	64482177	CR_up_colon
chr8	64513115	64513668	CR_up_colon
chr8	64525580	64526051	CR_up_colon
chr8	64539054	64539609	CR_up_colon
chr8	73311302	73312370	CR_up_colon
chr8	73316006	73317257	CR_up_colon
chr8	73320228	73322196	CR_up_colon
chr8	74044909	74046084	CR_up_colon
chr8	74060721	74062173	CR_up_colon
chr8	82161913	82164946	CR_up_colon
chr8	82173211	82174082	CR_up_colon
chr8	82203933	82205372	CR_up_colon
chr8	82234496	82236256	CR_up_colon
chr8	97870418	97871023	CR_up_colon
chr8	97872177	97873436	CR_up_colon
chr8	97875205	97877988	CR_up_colon
chr8	97880877	97881563	CR_up_colon
chr8	97882299	97885263	CR_up_colon
chr8	97887586	97888364	CR_up_colon
chr8	97899337	97902683	CR_up_colon
chr8	97932503	97934116	CR_up_colon
chr8	97947938	97949070	CR_up_colon
chr8	97951004	97952600	CR_up_colon
chr8	97957934	97959374	CR_up_colon
chr8	97976405	97976850	CR_up_colon
chr8	98011336	98014224	CR_up_colon
chr8	109673837	109675837	CR_up_colon
chr8	109710284	109711356	CR_up_colon
chr8	109716506	109717053	CR_up_colon
chr8	109756774	109758300	CR_up_colon
chr8	109772215	109772940	CR_up_colon
chr8	109776951	109777481	CR_up_colon
chr8	109778200	109779998	CR_up_colon
chr8	109816400	109818875	CR_up_colon
chr8	109847935	109848520	CR_up_colon
chr8	109908276	109909432	CR_up_colon
chr8	109910448	109911050	CR_up_colon
chr8	109912822	109914303	CR_up_colon
chr8	109914578	109915133	CR_up_colon
chr8	109925462	109927821	CR_up_colon
chr9	14643941	14644878	CR_up_colon
chr9	14646186	14647423	CR_up_colon
chr9	14662351	14665572	CR_up_colon
chr9	43916764	43918294	CR_up_colon
chr9	43919452	43922078	CR_up_colon
chr9	43933930	43934964	CR_up_colon
chr9	56021023	56022017	CR_up_colon
chr9	56026603	56028952	CR_up_colon
chr9	56047865	56049704	CR_up_colon
chr9	56060288	56062707	CR_up_colon
chr9	56071284	56071986	CR_up_colon
chr9	56090392	56093223	CR_up_colon
chr9	56103360	56104155	CR_up_colon
chr9	56108043	56108671	CR_up_colon
chr9	56110809	56111583	CR_up_colon
chr9	56112458	56112896	CR_up_colon
chr9	56119528	56120470	CR_up_colon
chr9	56133136	56134264	CR_up_colon
chr9	56210904	56211665	CR_up_colon
chr9	56211823	56212630	CR_up_colon
chr9	56262763	56263581	CR_up_colon
chr9	56264682	56267616	CR_up_colon
chr9	62134629	62135379	CR_up_colon
chr9	62142484	62143376	CR_up_colon
chr9	62147395	62148295	CR_up_colon
chr9	62188044	62193378	CR_up_colon
chr9	62194011	62194586	CR_up_colon
chr9	62201502	62202091	CR_up_colon
chr9	62211248	62212234	CR_up_colon
chr9	62215882	62217723	CR_up_colon
chr9	62220925	62222000	CR_up_colon
chr9	62222174	62223050	CR_up_colon
chr9	62267496	62269762	CR_up_colon
chr9	62273777	62275904	CR_up_colon
chr9	62283278	62284286	CR_up_colon
chr9	62286052	62287075	CR_up_colon
chr9	62302093	62304327	CR_up_colon
chr9	62316609	62317513	CR_up_colon
chr9	62317995	62319372	CR_up_colon
chr9	62324649	62325460	CR_up_colon
chr9	62338796	62339667	CR_up_colon
chr9	62342013	62342948	CR_up_colon
chr9	62345253	62346450	CR_up_colon
chr9	62383553	62386200	CR_up_colon
chr9	65755764	65757915	CR_up_colon
chr9	65852032	65852775	CR_up_colon
chr9	65906980	65908948	CR_up_colon
chr9	65991684	65992895	CR_up_colon
chr9	66000361	66002387	CR_up_colon
chr9	66005490	66007557	CR_up_colon
chr9	66028818	66031340	CR_up_colon
chr9	66034173	66034663	CR_up_colon
chr9	66044031	66044830	CR_up_colon
chr9	66046910	66048872	CR_up_colon
chr9	66049446	66050278	CR_up_colon
chr9	66053370	66054222	CR_up_colon
chr9	66059859	66062129	CR_up_colon
chr9	66067493	66068800	CR_up_colon
chr9	66073358	66074541	CR_up_colon
chr9	66076127	66077142	CR_up_colon
chr9	66088158	66089864	CR_up_colon
chr9	66098015	66100406	CR_up_colon
chr9	66113203	66115459	CR_up_colon
chr9	66117607	66118380	CR_up_colon
chr9	66119542	66120442	CR_up_colon
chr9	66123597	66125324	CR_up_colon
chr9	66131295	66132127	CR_up_colon
chr9	66147950	66149362	CR_up_colon
chr9	66152171	66154581	CR_up_colon
chr9	66155100	66155654	CR_up_colon
chr9	66158990	66159899	CR_up_colon
chr9	66179247	66180658	CR_up_colon
chr9	118515391	118516827	CR_up_colon
chr9	118521052	118522274	CR_up_colon
chr9	118613987	118615355	CR_up_colon
chr9	118714463	118716268	CR_up_colon
chr9	118755417	118756573	CR_up_colon
chr9	118779639	118781333	CR_up_colon
chr9	118799725	118800977	CR_up_colon
chr9	118816600	118817791	CR_up_colon
chr9	118828664	118830536	CR_up_colon
chr9	118833610	118836496	CR_up_colon
chr9	118836663	118839116	CR_up_colon
chr9	118844117	118844806	CR_up_colon
chr9	118848428	118850586	CR_up_colon
chr9	118851137	118852000	CR_up_colon
chr9	118882224	118884099	CR_up_colon
chr9	118893681	118895163	CR_up_colon
chr9	118903620	118905499	CR_up_colon
chr9	118938574	118939237	CR_up_colon
chr9	123197343	123198168	CR_up_colon
chr9	123274872	123276895	CR_up_colon
chr9	123278710	123280042	CR_up_colon
chr9	123358880	123359740	CR_up_colon
chr9	123370443	123371509	CR_up_colon
chrX	100867792	100868199	CR_up_colon
chrX	100869826	100870496	CR_up_colon
chrX	100889673	100891889	CR_up_colon
chrX	101015804	101018307	CR_up_colon
chrX	106206815	106209807	CR_up_colon
chrX	106274706	106275159	CR_up_colon
chrX	132642451	132642867	CR_up_colon
chrX	132705446	132707270	CR_up_colon
chrX	132779111	132781018	CR_up_colon
chrX	132804457	132805932	CR_up_colon
chrX	132856232	132856673	CR_up_colon
chrX	132881885	132882400	CR_up_colon
chrX	159339134	159340645	CR_up_colon
chrX	159405201	159406005	CR_up_colon
chrX	159424795	159425571	CR_up_colon
chrX	159552886	159553937	CR_up_colon
chrX	159559741	159560250	CR_up_colon
chrX	159566459	159567044	CR_up_colon
chrX	159582433	159582803	CR_up_colon
chrX	159939837	159940573	CR_up_colon
chrX	159942739	159943284	CR_up_colon
chrX	159949335	159950691	CR_up_colon
chrX	159956853	159957454	CR_up_colon
