# Supplementary material for: Microbiota modulate transcription in the intestinal epithelium without remodeling the accessible chromatin landscape
Source: HighWire-hosted journal article supplement (doi:10.1101/gr.165845.113), 2014-06-24
Supplement: Supplemental_TableS10.xlsx [file Supplemental_TableS10.xlsx]

## Sheet: Sheet1
TABLE S10: Motif prediction in DHS near genes with differential expression between microbiota colonization states.
		ileum		colon		ileum		colon
Motif Name	Consensus	CR Up vs. background (Log P-value)	CV Up vs. background (Log P-value)	CR Up vs. background (Log P-value)	CV Up vs. background (Log P-value)	CR Up vs. CV Up (Log P-value)	CR Down vs. CV Down (Log P-value)	CR Up vs. CV Up (Log P-value)	CR Down vs. CV Down (Log P-value)
CTCF(Zf)/CD4+-CTCF-ChIP-Seq(Barski et al.)/Homer	AYAGTGCCMYCTRGTGGCCA	-29.73	-35.32	-70.18	-200.6	-0.2068	-1.066	-0.007906	-5.278
BORIS(Zf)/K562-CTCFL-ChIP-Seq(GSE32465)/Homer	CNNBRGCGCCCCCTGSTGGC	-24.69	-20.85	-42.81	-121	-0.2202	-0.3144	-0.02432	-4.467
Hnf1(Homeobox)/Liver-Foxa2-Chip-Seq(GSE25694)/Homer	GGTTAAWCATTAA	-10.14	-8.11	-10.21	-18.59	-0.1108	-0.23	-0.517	-0.8185
Sp1(Zf)/Promoter/Homer	GGCCCCGCCCCC	-13.45	-9.765	-18.57	-18.26	-0.2224	-0.4141	-1.515	-0.305
Klf4(Zf)/mES-Klf4-ChIP-Seq(GSE11431)/Homer	GCCACACCCA	-7.746	-8.895	-16.21	-33.52	-0.1959	-0.5374	-0.4441	-1.166
HNF4a(NR/DR1)/HepG2-HNF4a-ChIP-Seq(GSE25021)/Homer	CARRGKBCAAAGTYCA	-15.45	-18.69	-9.488	-39.36	-0.000332	-0.6953	-0.05407	-3.487
Atf3(bZIP)/GBM-ATF3-ChIP-Seq(GSE33912)/Homer	DATGASTCATHN	-22.6	-27.02	-19.35	-62.06	-0.000193	-1.613	-0.05388	-2.65
BATF(bZIP)/Th17-BATF-ChIP-Seq(GSE39756)/Homer	DATGASTCAT	-18.55	-30.15	-19.72	-60.57	-4.4e-05	-2.594	-0.04045	-2.76
NF1(CTF)/LNCAP-NF1-ChIP-Seq(Unpublished)/Homer	CYTGGCABNSTGCCAR	-13.72	-10.04	-22.16	-40.41	-0.1666	-0.6011	-0.8439	-0.6227
EKLF(Zf)/Erythrocyte-Klf1-ChIP-Seq(GSE20478)/Homer	NWGGGTGTGGCY	-3.675	-14.25	-10.47	-29.91	-0.008629	-3.188	-0.2025	-1.597
GABPA(ETS)/Jurkat-GABPa-ChIP-Seq(GSE17954)/Homer	RACCGGAAGT	-11.5	-6.664	-21.41	-14.69	-1.286	-0.1757	-3.572	-0.02251
ELF5(ETS)/T47D-ELF5-ChIP-Seq(GSE30407)/Homer	ACVAGGAAGT	-7.874	-9.753	-16.9	-23.38	-0.2967	-0.5876	-0.9343	-0.443
KLF5(Zf)/LoVo-KLF5-ChIP-Seq(GSE49402)/Homer	DGGGYGKGGC	-9.563	-7.392	-21.49	-36.9	-0.5884	-0.3993	-0.8548	-0.4714
AP-1(bZIP)/ThioMac-PU.1-ChIP-Seq(GSE21512)/Homer	VTGACTCATC	-15.39	-21.53	-21.57	-56.43	-0.002241	-1.813	-0.1461	-1.806
ERG(ETS)/VCaP-ERG-ChIP-Seq(GSE14097)/Homer	ACAGGAAGTG	-11.92	-9.435	-23.65	-27.68	-0.4987	-0.2089	-1.774	-0.1169
Gata1(Zf)/K562-GATA1-ChIP-Seq(GSE18829)/Homer	SAGATAAGRV	-13.8	-13.9	-20.46	-29.13	-0.0783	-0.6433	-1.209	-0.3884
Jun-AP1(bZIP)/K562-cJun-ChIP-Seq(GSE31477)/Homer	GATGASTCATCN	-11	-21.59	-15.37	-47.78	-0.001281	-2.96	-0.04564	-3.287
caudal(Homeobox)/Drosophila-Embryos-ChIP-Chip(modEncode)/Homer	GGYCATAAAW	-12.26	-1.743	-27.22	-25.3	-4.096	-0.07857	-2.475	-0.06604
HOXA9(Homeobox)/HSC-Hoxa9-ChIP-Seq(GSE33509)/Homer	GGCCATAAATCA	-8.917	-1.419	-11.04	-12.26	-2.142	-0.01178	-1.597	-0.2384
Foxa2(Forkhead)/Liver-Foxa2-ChIP-Seq(GSE25694)/Homer	CYTGTTTACWYW	-2.555	-4.275	-10.04	-23.64	-0.3806	-0.5951	-0.3501	-1.059
ETS1(ETS)/Jurkat-ETS1-ChIP-Seq(GSE17954)/Homer	ACAGGAAGTG	-11.69	-3.894	-19.42	-19.3	-1.372	-0.05653	-2.574	-0.0719
Tlx?(NR)/NPC-H3K4me1-ChIP-Seq(GSE16256)/Homer	CTGGCAGSCTGCCA	-12.76	-4.878	-17.73	-14.14	-0.997	-0.106	-4.493	-0.02681
ELF1(ETS)/Jurkat-ELF1-ChIP-Seq(SRA014231)/Homer	AVCCGGAAGT	-9.104	-12.65	-12.33	-17.17	-0.03567	-1.379	-1.182	-0.3789
Gata2(Zf)/K562-GATA2-ChIP-Seq(GSE18829)/Homer	BBCTTATCTS	-16.82	-11.56	-19.35	-26.22	-0.1414	-0.2286	-1.179	-0.4553
Elk1(ETS)/Hela-Elk1-ChIP-Seq(GSE31477)/Homer	HACTTCCGGY	-5.837	-9	-7.545	-13.1	-0.03261	-1.544	-1.003	-0.6147
Bach2(bZIP)/OCILy7-Bach2-ChIP-Seq(GSE44420)/Homer	TGCTGAGTCA	-10.49	-14.03	-7.838	-28.19	-0.004128	-1.038	-0.08914	-2.737
Stat3(Stat)/mES-Stat3-ChIP-Seq(GSE11431)/Homer	CTTCCGGGAA	-2.085	-5.079	-12.06	-12.04	-0.4887	-1.298	-1.627	-0.1882
STAT1(Stat)/HelaS3-STAT1-ChIP-Seq(GSE12782)/Homer	NATTTCCNGGAAAT	-2.039	-4.236	-11.3	-9.505	-0.9306	-0.8416	-1.458	-0.2904
EHF(ETS)/LoVo-EHF-ChIP-Seq(GSE49402)/Homer	AVCAGGAAGT	-8.982	-4.302	-19.47	-18.82	-1.216	-0.06488	-2.118	-0.07623
ISRE(IRF)/ThioMac-LPS-exp(GSE23622)/HOMER	AGTTTCASTTTC	-5.981	-4.067	-12.28	-3.686	-1.141	-0.163	-2.839	-0.03638
Nur77(NR)/K562-NR4A1-ChIP-Seq(GSE31363)/Homer	TGACCTTTNCNT	-11.83	-17.72	-7.496	-14.96	-0.001438	-1.268	-0.5404	-0.9128
ETV1(ETS)/GIST48-ETV1-ChIP-Seq(GSE22441)/Homer	AACCGGAAGT	-6.088	-4.828	-13.76	-16.37	-0.8063	-0.2649	-1.72	-0.1617
Fli1(ETS)/CD8-FLI-ChIP-Seq(GSE20898)/Homer	NRYTTCCGGH	-9.433	-5.259	-15.53	-20.45	-0.569	-0.09047	-1.343	-0.2967
EWS:ERG-fusion(ETS)/CADO_ES1-EWS:ERG-ChIP-Seq(SRA014231)/Homer	ATTTCCTGTN	-7.471	-1.896	-19.55	-15.51	-1.785	-0.02835	-2.194	-0.09817
Erra(NR)/HepG2-Erra-ChIP-Seq(GSE31477)/Homer	CAAAGGTCAG	-8.5	-6.616	-3.094	-12.42	-0.01082	-0.2894	-0.06408	-2.417
Fox:Ebox(Forkhead:HLH)/Panc1-Foxa2-ChIP-Seq(GSE47459)/Homer	NNNVCTGWGYAAACASN	-3.584	-3.576	-20.3	-19.03	-1.202	-0.5526	-1.412	-0.1868
E2F4(E2F)/K562-E2F4-ChIP-Seq(GSE31477)/Homer	GGCGGGAAAH	-8.492	-0.6793	-2.938	-4.014	-0.7939	-0.02729	-0.8347	-0.4552
STAT4(Stat)/CD4-Stat4-ChIP-Seq(GSE22104)/Homer	NYTTCCWGGAAR	-4.032	-6.061	-11.97	-17.43	-0.5286	-0.4257	-0.9741	-0.456
Bach1(bZIP)/K562-Bach1-ChIP-Seq(GSE31477)/Homer	AWWNTGCTGAGTCAT	-6.255	-5.181	-0.9043	-13.57	-0.01208	-0.7454	-0.02194	-4.205
ETS(ETS)/Promoter/Homer	AACCGGAAGT	-7.518	-10.16	-13.91	-11.94	-0.1076	-1.627	-1.854	-0.1854
BMYB(HTH)/Hela-BMYB-ChIPSeq(GSE27030)/Homer	NHAACBGYYV	-8.067	-7.907	-4.533	-10.86	-0.01913	-0.5328	-0.3021	-1.288
PU.1(ETS)/ThioMac-PU.1-ChIP-Seq(GSE21512)/Homer	AGAGGAAGTG	-8.772	-3.112	-8.275	-7.035	-0.2381	-0.3042	-1.463	-0.3467
STAT6/Macrophage-Stat6-ChIP-Seq(GSE38377)/Homer	TTCCKNAGAA	-12.07	-0.5622	-8.295	-8.406	-2.315	-0.001185	-1.568	-0.2548
ETS:RUNX/Jurkat-RUNX1-ChIP-Seq(GSE17954)/Homer	RCAGGATGTGGT	-5.518	-2.785	-2.697	-9.092	-0.1445	-0.4547	-0.7752	-0.5368
Hoxc9(Homeobox)/Ainv15-Hoxc9-ChIP-Seq(GSE21812)/Homer	GGCCATAAATCA	-6.661	-0.9088	-3.892	-5.121	-0.6941	-0.04033	-0.9903	-0.5425
NF1-halfsite(CTF)/LNCaP-NF1-ChIP-Seq(Unpublished)/Homer	YTGCCAAG	-6.774	-2.834	-14.97	-23.36	-1.521	-0.1415	-0.9757	-0.5804
RXR(NR/DR1)/3T3L1-RXR-ChIP-Seq(GSE13511)/Homer	TAGGGCAAAGGTCA	-4.75	-8.227	-6.538	-23.76	-0.00816	-1.168	-0.09911	-2.306
Ets1-distal(ETS)/CD4+-PolII-ChIP-Seq(Barski et al.)/Homer	MACAGGAAGT	-5.803	-2.743	-5.772	-7.942	-0.1722	-0.3427	-1.116	-0.4116
Cdx2(Homeobox)/mES-Cdx2-ChIP-Seq(GSE14586)/Homer	GYMATAAAAH	-3.525	-1.588	-16.01	-18.78	-2.678	-0.4406	-1.396	-0.214
Gata4(Zf)/Heart-Gata4-ChIP-Seq(GSE35151)/Homer	NBWGATAAGR	-11.02	-8.478	-10	-19.99	-0.04419	-0.324	-0.4601	-1.293
Foxo1(Forkhead)/RAW-Foxo1-ChIP-Seq(Fan et al.)/Homer	CTGTTTAC	-1.328	-3.754	-7.677	-16.51	-0.3527	-1.29	-0.3032	-1.017
GATA3(Zf)/iTreg-Gata3-ChIP-Seq(GSE20898)/Homer	AGATAASR	-11.4	-9.176	-6.835	-12	-0.01041	-0.2688	-0.2243	-1.751
Elk4(ETS)/Hela-Elk4-ChIP-Seq(GSE31477)/Homer	NRYTTCCGGY	-2.565	-8.293	-9.503	-4.645	-0.06339	-2.701	-2.345	-0.132
NFAT:AP1/Jurkat-NFATC1-ChIP-Seq(Jolma et al.)/Homer	SARTGGAAAAWRTGAGTCAB	-6.604	-2.045	-1.211	-3.019	-0.09322	-0.1679	-0.3196	-1.044
Unknown(Homeobox)/Limb-p300-ChIP-Seq/Homer	SSCMATWAAA	-1.405	-4.283	-7.131	-22.45	-0.4835	-1.88	-0.4723	-0.9292
TEAD(TEA)/Fibroblast-PU.1-ChIP-Seq(Unpublished)/Homer	YCWGGAATGY	-2.462	-1.464	-10.49	-7.983	-1.23	-0.671	-2.704	-0.05965
PPARE(NR/DR1)/3T3L1-Pparg-ChIP-Seq(GSE13511)/Homer	TGACCTTTGCCCCA	-8.807	-10.36	-4.613	-20.7	-0.000502	-0.9032	-0.05232	-3.209
EWS:FLI1-fusion(ETS)/SK_N_MC-EWS:FLI1-ChIP-Seq(SRA014231)/Homer	VACAGGAAAT	-7.675	-2.426	-13.82	-14.54	-0.9636	-0.1595	-1.295	-0.2881
NF-E2(bZIP)/K562-NFE2-ChIP-Seq(GSE31477)/Homer	GATGACTCAGCA	-4.546	-7.996	-3.472	-11.79	-0.04066	-1.119	-0.1797	-1.864
GATA-IR4(Zf)/iTreg-Gata3-ChIP-Seq(GSE20898)/Homer	NAGATWNBNATCTNN	-11.1	-0.5008	-8.987	-1.865	-3.894	-0.00045	-3.87	-0.01494
SUT1?/SacCer-Promoters/Homer	CCCCGCGC	-3.784	-1.096	-4.053	-4.321	-1.194	-0.09532	-0.761	-0.4961
ELT-3(Gata)/cElegans-L1-ELT3-ChIP-Seq(modEncode)/Homer	AWTGATAAGA	-9.937	-7.3	-4.906	-9.251	-0.03766	-0.209	-0.1658	-1.834
TR4(NR/DR1)/Hela-TR4-ChIP-Seq(GSE24685)/Homer	GAGGTCAAAGGTCA	-3.117	-9.246	-3.658	-12.53	-0.00343	-2.29	-0.1116	-2.337
STAT6(Stat)/CD4-Stat6-ChIP-Seq(GSE22104)/Homer	ABTTCYYRRGAA	-11.93	-2.978	-10.31	-8.327	-0.7309	-0.02704	-2.115	-0.1154
IRF1(IRF)/PBMC-IRF1-ChIP-Seq(GSE43036)/Homer	GAAAGTGAAAGT	-8.148	-4.853	-8.845	-3.506	-0.4198	-0.2695	-2.202	-0.06848
JunD(bZIP)/K562-JunD-ChIP-Seq/Homer	ATGACGTCATCN	-7.07	-5.32	-7.394	-5.334	-0.1375	-0.5534	-1.457	-0.2412
HRE(HSF)/Striatum-HSF1-ChIP-Seq(GSE38000)/Homer	TTCTAGAABNTTCTA	-3.377	-3.512	-3.779	-6.272	-0.1714	-0.5571	-0.6056	-0.757
E2F(E2F)/Cell-Cycle-Exp/Homer	TTSGCGCGAAAA	-4.455	-0.1982	-1.488	-0.5482	-1.619	-0.0273	-1.479	-0.27
Rbpj1(?)/Panc1-Rbpj1-ChIP-Seq(GSE47459)/Homer	HTTTCCCASG	-3.821	-3.019	-6.521	-16.5	-0.5107	-0.1157	-0.3311	-1.218
Unknown3/Arabidopsis-Promoters/Homer	AYTAAACCGG	-0.9918	-0.8979	-5.629	-7.488	-0.6223	-0.8125	-0.8861	-0.5839
TEAD4(TEA)/Tropoblast-Tead4-ChIP-Seq(GSE37350)/Homer	CCWGGAATGY	-2.093	-3.12	-4.539	-6.03	-0.1578	-0.906	-1.093	-0.4207
FOXP1(Forkhead)/H9-FOXP1-ChIP-Seq(GSE31006)/Homer	NYYTGTTTACHN	-5.731	-2.222	-8.283	-12.1	-0.8649	-0.2634	-0.8278	-0.6482
Isl1(Homeobox)/Neuron-Isl1-ChIP-Seq(GSE31456)/Homer	CTAATKGV	-5.911	-2.214	-4.885	-2.663	-0.8286	-0.1562	-2.176	-0.07889
Lhx3(Homeobox)/Neuron-Lhx3-ChIP-Seq(GSE31456)/Homer	ADBTAATTAR	-5.368	-1.626	-4.965	-2.056	-0.4078	-0.02513	-2.368	-0.06008
AMYB(HTH)/Testes-AMYB-ChIP-Seq(GSE44588)/Homer	TGGCAGTTGG	-5.446	-4.439	-5.038	-4.543	-0.06978	-0.6593	-0.6709	-0.5825
E-box(HLH)/Promoter/Homer	SSGGTCACGTGA	-0.8786	-5.758	-5.007	-9.687	-0.1632	-2.555	-0.5122	-0.7317
PQM-1(?)/cElegans-L3-ChIP-Seq(modEncode)/Homer	ACTGATAAGA	-10.91	-5.188	-6.148	-10.15	-0.2219	-0.1161	-0.4287	-1.201
c-Jun-CRE(bZIP)/K562-cJun-ChIP-Seq(GSE31477)/Homer	ATGACGTCATCY	-7.014	-6.788	-7.208	-7.127	-0.09745	-0.3157	-0.9076	-0.3457
Foxh1(Forkhead)/hESC-FOXH1-ChIP-Seq(GSE29422)/Homer	NNTGTGGATTSS	-1.347	-0.1132	-3.999	-2.284	-2.804	-0.2684	-1.445	-0.2118
IRF2(IRF)/Erythroblas-IRF2-ChIP-Seq(GSE36985)/Homer	GAAASYGAAASY	-7.362	-9.142	-8.681	-5.83	-0.3059	-0.8656	-1.569	-0.1832
SPDEF(ETS)/VCaP-SPDEF-ChIP-Seq(SRA014231)/Homer	ASWTCCTGBT	-1.883	-7.135	-10.64	-10.99	-0.04949	-1.905	-0.7768	-0.585
Cbf1(bHLH)/Yeast-Cbf1-ChIP-Seq(GSE29506)/Homer	TCACGTGAYH	-0.5824	-4.201	-1.615	-9.979	-0.009055	-2.249	-0.0851	-1.859
CEBP:CEBP(bZIP)/MEF-Chop-ChIP-Seq(GSE35681)/Homer	NTNATGCAAYMNNHTGMAAY	-2.428	-2.488	-1.893	-1.071	-0.2007	-0.6055	-0.7075	-0.5705
CEBP(bZIP)/CEBPb-ChIP-Seq(GSE21512)/Homer	ATTGCGCAAC	-3.192	-4.703	-6.338	-19.69	-0.01999	-1.661	-0.1296	-2.398
CHR/Cell-Cycle-Exp/Homer	SRGTTTCAAA	-10.28	-6.33	-5.957	-11.29	-0.06444	-0.5131	-0.5997	-0.6455
Stat3+il21(Stat)/CD4-Stat3-ChIP-Seq(GSE19198)/Homer	SVYTTCCNGGAARB	-1.613	-3.881	-10.01	-12.15	-0.4909	-0.8242	-0.8613	-0.6358
STAT5(Stat)/mCD4+-Stat5-ChIP-Seq(GSE12346)/Homer	RTTTCTNAGAAA	-1.713	-3.962	-8.247	-6.278	-0.7331	-1.196	-1.051	-0.4881
HOXD13(Homeobox)/Chicken-Hoxd13-ChIP-Seq(GSE38910)/Homer	NCYAATAAAA	-0.5943	-1.426	-5.876	-18.44	-0.7079	-2.255	-0.08647	-2.137
NFkB-p65-Rel(RHD)/LPS-exp(GSE23622)/Homer	GGAAATTCCC	-1.213	-2.782	-8.515	-10.92	-1.251	-0.6684	-1.073	-0.3165
GRE/RAW264.7-GRE-ChIP-Seq(Unpublished)/Homer	VAGRACAKWCTGTYC	-1.664	-5.685	-3.05	-6.591	-0.02851	-1.904	-0.4807	-0.9281
TRa(NR)/C17.2-TRa-ChIP-Seq(GSE38347)/Homer	GGTCANYTGAGGWCA	-1.168	-1.91	-0.2977	-5.055	-0.004923	-1.264	-0.04504	-3.062
Tbet(T-box)/CD8-Tbet-ChIP-Seq(GSE33802)/Homer	AGGTGTGAAM	-1.119	-3.911	-6.884	-7.381	-0.236	-1.422	-1.975	-0.1363
Eomes(T-box)/H9-Eomes-ChIP-Seq(GSE26097)/Homer	ATTAACACCT	-4.198	-3.506	-8.856	-8.056	-0.7806	-0.1159	-1.232	-0.3181
Pdx1(Homeobox)/Islet-Pdx1-ChIP-Seq(SRA008281)/Homer	YCATYAATCA	-2.524	-4.843	-1.514	-1.484	-0.003217	-0.358	-0.5177	-0.9881
MYB(HTH)/ERMYB-Myb-ChIPSeq(GSE22095)/Homer	GGCVGTTR	-4.303	-3.174	-5.048	-2.607	-0.2461	-0.2	-0.8042	-0.5083
E2F1(E2F)/Hela-E2F1-ChIP-Seq(GSE22478)/Homer	CWGGCGGGAA	-6.923	-0.8664	-0.4089	-1.544	-0.1124	-0.0725	-0.3176	-1.147
PU.1-IRF(ETS:IRF)/Bcell-PU.1-ChIP-Seq(GSE21512)/Homer	MGGAAGTGAAAC	-6.063	-0.4411	-3.5	-1.757	-0.7791	-0.002576	-1.383	-0.3101
TATA-Box(TBP)/Promoter/Homer	CCTTTTAWAGSC	-0.8105	-0.6282	-5.771	-7.277	-1.658	-0.1669	-0.6229	-0.5744
Nkx6.1(Homeobox)/Islet-Nkx6.1-ChIP-Seq(GSE40975)/Homer	GKTAATGR	-6.217	-1.199	-1.971	-2.377	-0.3082	-0.01421	-0.891	-0.3991
Atoh1(bHLH)/Cerebellum-Atoh1-ChIP-Seq(GSE22111)/Homer	VNRVCAGCTGGY	-5.664	-0.5622	-6.447	-2.201	-1.416	-0.005041	-2.099	-0.1924
FOXA1(Forkhead)/LNCAP-FOXA1-ChIP-Seq(GSE27824)/Homer	WAAGTAAACA	-1.131	-1.676	-8.163	-11.53	-0.6741	-0.4887	-0.482	-0.7708
Esrrb(NR)/mES-Esrrb-ChIP-Seq(GSE11431)/Homer	KTGACCTTGA	-7.993	-2.734	-0.7491	-3.518	-0.007962	-0.2699	-0.1065	-2.362
Sox6(HMG)/Myotubes-Sox6-ChIP-Seq(GSE32627)/Homer	CCATTGTTNY	-0.6484	-4.299	-2.349	-6.396	-0.006737	-1.834	-0.2089	-1.579
E2F7(E2F)/Hela-E2F7-ChIP-Seq(GSE32673)/Homer	VDTTTCCCGCCA	-5.421	-2.049	-2.427	-1.779	-0.4822	-0.1685	-0.5808	-0.7846
Tcf12(HLH)/GM12878-Tcf12-ChIP-Seq(GSE32465)/Homer	VCAGCTGYTG	-2.039	-2.504	-5.281	-9.129	-0.3049	-0.5785	-0.6342	-0.9469
E2F6(E2F)/Hela-E2F6-ChIP-Seq(GSE31477)/Homer	GGCGGGAARN	-6.169	-1.445	-1.73	-1.417	-0.1589	-0.2065	-0.5852	-0.8184
Unknown-ESC-element/mES-Nanog-ChIP-Seq(GSE11724)/Homer	CACAGCAGGGGG	-7.495	-1.551	-3.147	-6.942	-0.1106	-0.1003	-0.2955	-1.277
GFX(?)/Promoter/Homer	ATTCTCGCGAGA	-1.861	-1.855	-2.652	-2.827	-0.7712	-0.3576	-1.01	-0.4173
Sox3(HMG)/NPC-Sox3-ChIP-Seq(GSE33059)/Homer	CCWTTGTY	-1.861	-4.571	-1.879	-7.781	-0.01439	-1.039	-0.04349	-3.069
Hoxb4(Homeobox)/ES-Hoxb4-ChIP-Seq(GSE34014)/Homer	TGATTRATGGCY	-5.341	-2.016	-1.133	-0.9478	-0.1552	-0.07301	-0.7764	-0.5653
SCL(HLH)/HPC7-Scl-ChIP-Seq(GSE13511)/Homer	AVCAGCTG	-1.48	-2.242	-7.201	-7.574	-1.686	-0.2655	-0.8018	-0.4345
Unknown4/Drosophila-Promoters/Homer	AAAAATACCRMA	-0.7481	-0.3017	-2.883	-1.579	-2.039	-0.2028	-1.23	-0.2756
CEBP:AP1(bZIP)/ThioMac-CEBPb-ChIP-Seq(GSE21512)/Homer	DRTGTTGCAA	-1.608	-4.662	-7.758	-6.346	-0.1384	-1.347	-1.23	-0.3076
Oct4:Sox17/F9-Sox17-ChIP-Seq(GSE44553)/Homer	CCATTGTATGCAAAT	-0.8412	-2.195	-1.491	-7.806	-0.2625	-0.7205	-0.09269	-2.115
USF1(HLH)/GM12878-Usf1-ChIP-Seq(GSE32465)/Homer	SGTCACGTGR	-0.9152	-2.255	-3.347	-11.14	-0.1243	-0.9855	-0.2178	-1.477
Chop(bZIP)/MEF-Chop-ChIP-Seq(GSE35681)/Homer	ATTGCATCAT	-0.6648	-0.8119	-0.7764	-3.12	-0.1915	-0.5468	-0.2098	-1.749
Tbx5(T-box)/HL1-Tbx5.biotin-ChIP-Seq(GSE21529)/Homer	AGGTGTCA	-0.4721	-1.216	-9.1	-20.18	-3.597	-0.5425	-0.4831	-0.7341
Reverb(NR/DR2)/BLRP(RAW)-Reverba-ChIP-Seq(GSE45914)/Homer	GTRGGTCASTGGGTCA	-3.114	-0.2079	-2.298	-0.9415	-0.7185	-0.1015	-1.626	-0.2179
Unknown5/Drosophila-Promoters/Homer	GCTGATAASV	-5.397	-3.788	-6.314	-6.004	-0.1337	-0.422	-0.6694	-0.6821
Tcf3(HMG)/mES-Tcf3-ChIP-Seq(GSE11724)/Homer	ASWTCAAAGG	-0.9465	-4.529	-1.379	-0.9656	-0.01714	-3.051	-1.322	-0.2414
Unknown2/Arabidopsis-Promoters/Homer	AAACGACGTCGTTTT	-10.21	-1.714	-0.6567	-2.912	-0.06731	-0.21	-0.1941	-1.411
NFAT(RHD)/Jurkat-NFATC1-ChIP-Seq(Jolma et al.)/Homer	ATTTTCCATT	-4.742	-0.3758	-8.744	-3.641	-2.509	-0.06798	-4.644	-0.0118
Smad3(MAD)/NPC-Smad3-ChIP-Seq(GSE36673)/Homer	TWGTCTGV	-0.9141	-1.951	-4.728	-7.242	-0.6335	-0.7839	-0.4165	-1.035
Sox2(HMG)/mES-Sox2-ChIP-Seq(GSE11431)/Homer	BCCATTGTTC	-1.961	-2.747	-2.02	-8.749	-0.01018	-1.547	-0.03595	-2.997
FXR(NR/IR1)/Liver-FXR-ChIP-Seq(Chong et al.)/Homer	AGGTCANTGACCTB	-3.75	-2.487	-1.112	-3.971	-0.003915	-1.082	-0.1472	-1.632
Nrf2(bZIP)/Lymphoblast-Nrf2-ChIP-Seq(GSE37589)/Homer	HTGCTGAGTCAT	-2.317	-8.707	-4.256	-11.44	-0.04182	-1.636	-0.1931	-1.59
CRE(bZIP)/Promoter/Homer	CSGTGACGTCAC	-2.123	-9.542	-2.572	-3.782	-0.001003	-4.011	-0.3912	-1.048
Phox2a(Homeobox)/Neuron-Phox2a-ChIP-Seq(GSE31456)/Homer	YTAATYNRATTA	-1.12	-2.647	-2.271	-0.5496	-0.1312	-1.412	-2.421	-0.06353
REB1/SacCer-Promoters/Homer	KCCGGGTAAYRR	-0.07854	-3.026	-0.3231	-3.046	-0.000986	-5.237	-0.07044	-1.972
Bcl6(Zf)/Liver-Bcl6-ChIP-Seq(GSE31578)/Homer	NNNCTTTCCAGGAAA	-1.366	-2.086	-5.719	-10.63	-0.6049	-0.4498	-0.6976	-0.7096
E-box/Drosophila-Promoters/Homer	AACAGCTGTTHN	-4.916	-1.703	-2.516	-5.033	-0.2876	-0.4411	-0.6465	-0.8118
Myf5(bHLH)/GM-Myf5-ChIP-Seq(GSE24852)/Homer	BAACAGCTGT	-1.515	-4.239	-6.162	-10.09	-0.1103	-1.35	-0.3904	-1.151
Tal1	CATCTG	-3.79	-0.3475	-3.488	-0.3187	-1.888	-0.004534	-2.657	-0.04049
MafF(bZIP)/HepG2-MafF-ChIP-Seq(GSE31477)/Homer	HWWGTCAGCAWWTTT	-1.317	-2.009	-0.5285	-1.854	-0.1146	-0.9339	-0.3333	-1.076
VDR(NR/DR3)/GM10855-VDR+vitD-ChIP-Seq(GSE22484)/Homer	ARAGGTCANWGAGTTCANNN	-6.778	-0.9548	-1.436	-3.656	-0.06121	-0.07374	-0.2217	-1.62
EBF(EBF)/proBcell-EBF-ChIP-Seq(GSE21978)/Homer	DGTCCCYRGGGA	-2.176	-2.815	-3.51	-9.803	-0.09242	-0.7056	-0.5068	-0.8611
p53(p53)/Saos-p53-ChIP-Seq(GSE15780)/Homer	RRCATGYCYRGRCATGYYYN	-0.01682	-1.616	-0.2132	-0.01961	-0.0621	-2.708	-0.9656	-0.3105
p53(p53)/Saos-p53-ChIP-Seq/Homer	RRCATGYCYRGRCATGYYYN	-0.01682	-1.616	-0.2132	-0.01961	-0.0621	-2.708	-0.9656	-0.3105
LIN-15B(Zf)/cElegans-L3-LIN15B-ChIP-Seq(modEncode)/Homer	CARTGGAGCGCRYTTGCATT	0	0	-1.811	-0.178	-1.382	0	-1.482	-0.1286
GFY-Staf/Promoters/Homer	RACTACAATTCCCAGAAKGC	-0.2848	-0.3412	-0.7157	-0.1026	-0.508	-0.3961	-0.7781	-0.5317
GFY(?)/Promoter/Homer	ACTACAATTCCC	-1.234	-2.748	-2.3	-8.959	-0.1818	-0.4561	-0.1327	-2.183
Tcf4(HMG)/Hct116-Tcf4-ChIP-Seq(SRA012054)/Homer	ASATCAAAGGVA	-1.735	-1.981	-2.143	-1.301	-0.2603	-1.235	-1.726	-0.2331
ABF1/SacCer-Promoters/Homer	CGTRNAAARTGA	-1.398	-1.013	-1.304	-0.4021	-0.4985	-0.4188	-1.503	-0.3698
PBX1(Homeobox)/MCF7-PBX1-ChIP-Seq(GSE28007)/Homer	GSCTGTCACTCA	-0.3551	-1.451	-1.638	-3.236	-0.2817	-0.8751	-1.189	-0.3078
Unknown2/Drosophila-Promoters/Homer	CATCMCTA	-0.5279	-0.7723	-1.379	-1.011	-0.3807	-0.1617	-0.5305	-0.7595
HRE(HSF)/HepG2-HSF1-ChIP-Seq(GSE31477)/Homer	BSTTCTRGAABVTTCYAGAA	-1.931	-2.805	-1.668	-4.416	-0.09254	-1.874	-0.4409	-0.7269
Lhx2(Homeobox)/HFSC-Lhx2-ChIP-Seq(GSE48068)/Homer	TAATTAGN	-4.862	-0.8469	-3.266	-1.093	-0.6862	-0.0226	-2.429	-0.06882
Unknown3/Drosophila-Promoters/Homer	ACVAKCTGGCAGCGC	-1.054	-1.448	-3.957	-2.55	-1.257	-0.5141	-1.622	-0.1501
Unknown1(NR/Ini-like)/Drosophila-Promoters/Homer	MYGGTCACACTG	-0.9997	-1.984	-0.04639	-3.844	-0.002642	-0.6979	-0.00266	-6.688
SeqBias: GA-repeat	GAGAGAGAGA	-1.904	-0.4667	-2.885	-4.17	-1.158	-0.2634	-0.2659	-1.076
NFY(CCAAT)/Promoter/Homer	RGCCAATSRG	-1.515	-0.9895	-1.208	-0.1927	-0.1569	-0.6062	-2.159	-0.1528
HLH-1(bHLH)/cElegans-Embryo-HLH1-ChIP-Seq(modEncode)/Homer	RACAGCTGTTBH	-2.921	-1.636	-5.217	-5.953	-0.407	-0.3	-0.6872	-0.7288
Nanog(Homeobox)/mES-Nanog-ChIP-Seq(GSE11724)/Homer	RGCCATTAAC	-3.434	-4.232	-1.86	-5.573	-0.03505	-0.542	-0.177	-1.583
Tbx20(T-box)/Heart-Tbx20-ChIP-Seq(GSE29636)/Homer	GGTGYTGACAGS	-2.216	-0.286	-1.561	-5.077	-0.2985	-0.6788	-0.362	-1.192
FOXA1(Forkhead)/MCF7-FOXA1-ChIP-Seq(GSE26831)/Homer	WAAGTAAACA	-0.6859	-1.077	-5.702	-8.967	-0.882	-0.2922	-0.4973	-0.7394
Oct4(POU/Homeobox)/mES-Oct4-ChIP-Seq(GSE11431)/Homer	ATTTGCATAW	-0.8804	-0.782	-1.344	-0.6225	-0.4114	-0.3943	-0.5771	-0.7918
Mef2a(MADS)/HL1-Mef2a.biotin-ChIP-Seq(GSE21529/Homer	CYAAAAATAG	-0.8989	-0.7758	-0.8152	-0.6639	-0.2187	-0.8011	-0.8989	-0.5946
T1ISRE(IRF)/Ifnb-Exp/Homer	ACTTTCGTTTCT	-3.169	-0.2736	-0.3182	-1.205	-1.224	-0.02275	-0.5711	-0.8236
Ptf1a(HLH)/Panc1-Ptf1a-ChIP-Seq(GSE47459)/Homer	ACAGCTGTTN	-3.514	-0.6726	-4.374	-2.728	-1.708	-0.02769	-1.501	-0.146
NeuroD1(bHLH)/Islet-NeuroD1-ChIP-Seq(GSE30298)/Homer	GCCATCTGTT	-4.52	-2.081	-4.305	-3.708	-0.2305	-0.1192	-0.9152	-0.5822
EGL-5(Homeobox)/cElegans-L3-EGL5-ChIP-Seq(modEncode)/Homer	ATTTAATGGG	-2.41	-0.3061	-2.615	-1.928	-0.5012	-0.2069	-1.141	-0.3056
DPL-1(E2F)/cElegans-Adult-ChIP-Seq(modEncode)/Homer	TAGCGCGC	-2.753	-3.409	-0.3833	-2.257	-0.002076	-0.5139	-0.03179	-3.575
Initiator/Drosophila-Promoters/Homer	NTCAGTYG	-3.326	-3.207	-5.836	-5.817	-0.3288	-0.6242	-0.8161	-0.4163
Srebp2(HLH)/HepG2-Srebp2-ChIP-Seq(GSE31477)/Homer	CGGTCACSCCAC	-3.676	-2.854	-0.6336	-3.594	-0.005461	-0.9063	-0.06328	-2.69
Atf1(bZIP)/K562-ATF1-ChIP-Seq(GSE31477)/Homer	GATGACGTCA	-3.358	-3.231	-3.457	-3.631	-0.1148	-0.1416	-0.323	-0.8964
CArG(MADS)/PUER-Srf-ChIP-Seq(Sullivan et al.)/Homer	CCATATATGGNM	-1.259	-0.385	-5.554	-2.06	-2.079	-0.171	-3.315	-0.02719
TOD6?/SacCer-Promoters/Homer	GCGATGAGMT	-0.007663	-0.301	-0.7276	-1.746	-0.1591	-3.024	-0.2607	-1.097
PAX5-shortForm(Paired/Homeobox)/GM12878-PAX5-ChIP-Seq(GSE32465)/Homer	GTCACGCTCSCTGM	-1.406	-0.4057	-1.521	-0.7476	-0.6999	-0.5594	-1.954	-0.2472
Arnt:Ahr(bHLH)/MCF7-Arnt-ChIP-Seq(Lo et al.)/Homer	TBGCACGCAA	-0.4492	-0.2342	-0.1398	-2.262	-0.05625	-0.5229	-0.02787	-3.704
PRDM1/BMI1(Zf)/Hela-PRDM1-ChIP-Seq(GSE31477)/Homer	ACTTTCACTTTC	-1.343	-1.216	-1.787	-1.281	-0.3638	-0.4118	-1.04	-0.4053
Tcfcp2l1(CP2)/mES-Tcfcp2l1-ChIP-Seq(GSE11431)/Homer	NRAACCRGTTYRAACCRGYT	-2.214	-3.664	-3.94	-3.046	-0.07118	-1.277	-1.429	-0.2048
PAX3:FKHR-fusion(Paired/Homeobox)/Rh4-PAX3:FKHR-ChIP-Seq(GSE19063)/Homer	ACCRTGACTAATTNN	-1.294	-0.2594	-0.5187	-4.63	-0.5424	-0.03857	-0.02558	-3.228
NRF1(NRF)/MCF7-NRF1-ChIP-Seq(Unpublished)/Homer	CTGCGCATGCGC	-0.9324	-0.4863	-0.5397	-0.9618	-0.3278	-0.301	-0.5808	-1.012
Maz(Zf)/HepG2-Maz-ChIP-Seq(GSE31477)/Homer	GGGGGGGG	-3.788	-1.649	-1.28	-3.224	-0.1121	-0.2723	-0.3775	-1.436
EBF1(EBF)/Near-E2A-ChIP-Seq(GSE21512)/Homer	GTCCCCWGGGGA	-4.746	-0.4297	-1.698	-2.655	-0.7995	-0.03297	-0.6663	-0.9284
EBNA1(EBV virus)/Raji-EBNA1-ChIP-Seq(GSE30709)/Homer	GGYAGCAYDTGCTDCCCNNN	-1.709	-0.3053	-0.9135	-1.504	-0.9845	-0.0187	-0.3238	-0.9618
PRDM14(Zf)/H1-PRDM14-ChIP-Seq(GSE22767)/Homer	RGGTCTCTAACY	-0.1111	-0.6011	-0.1953	-0.4069	-0.06319	-2.805	-0.4942	-0.5294
SeqBias: polyC-repeat	CCCCCCCCCC	-1.156	-0.2219	-2.342	-1.19	-0.9205	-0.0739	-0.9898	-0.1454
PHA-4(Forkhead)/cElegans-Embryos-PHA4-ChIP-Seq(modEncode)/Homer	KTGTTTGC	-0.4561	-0.3982	-1.494	-2.212	-0.5224	-0.2155	-0.1704	-1.359
Olig2(bHLH)/Neuron-Olig2-ChIP-Seq(GSE30882)/Homer	RCCATMTGTT	-1.681	-0.2487	-3.398	-0.5142	-1.24	-0.01331	-1.47	-0.3345
RUNX1(Runt)/Jurkat-RUNX1-ChIP-Seq(GSE29180)/Homer	AAACCACARM	-0.7515	-0.8263	-0.9707	-0.7124	-0.07997	-0.7725	-0.4055	-0.9426
SeqBias: CG-repeat	CGCGCGCGCG	-1.712	-2.859	-0.7055	-1.111	-0.02083	-1.143	-0.1614	-1.58
PRDM9(Zf)/Testis-DMC1-ChIP-Seq(GSE35498)/Homer	ADGGYAGYAGCATCT	-0.8464	-0.6319	-0.9668	-0.6443	-0.09407	-0.5232	-0.5067	-0.6194
Mouse_Recombination_Hotspot/Testis-DMC1-ChIP-Seq(GSE24438)/Homer	ACTYKNATTCGTGNTACTTC	-0.4351	-0.2075	-0.9238	-1.061	-1.496	-0.308	-0.7219	-0.6434
AP-2alpha(AP2)/Hela-AP2alpha-ChIP-Seq(GSE31477)/Homer	ATGCCCTGAGGC	-0.9285	-0.4278	-1.41	-1.249	-0.2825	-0.6329	-1.097	-0.3512
SeqBias: polyA-repeat	AAAAAAAAAA	-1.753	-0.5535	-0.4427	-1.389	-0.1803	-0.5365	-0.7063	-0.3182
NFkB-p65(RHD)/GM12787-p65-ChIP-Seq(GSE19485)/Homer	WGGGGATTTCCC	-4.548	-6.356	-2.954	-4.583	-0.009411	-1.123	-0.3574	-1.048
Six1(Homeobox)/Myoblast-Six1-ChIP-Chip(GSE20150)/Homer	GKVTCADRTTWC	-0.3238	-3.479	-2.526	-1.634	-0.02851	-3.438	-1.07	-0.2524
NRF1/Promoter/Homer	STGCGCATGCGC	-0.6248	-0.8156	-0.09009	-0.0162	-0.03788	-0.5521	-0.6896	-0.6235
Pbx3(Homeobox)/GM12878-PBX3-ChIP-Seq(GSE32465)/Homer	SCTGTCAMTCAN	-0.8585	-2.203	-4.296	-6.154	-0.2475	-1.16	-0.8402	-0.55
Usf2(HLH)/C2C12-Usf2-ChIP-Seq(GSE36030)/Homer	GTCACGTGGT	-1.154	-1.755	-5.559	-8.466	-0.4765	-1.013	-0.9355	-0.4206
SeqBias: A/T bias	WWWWWWWWWW	-1.793	-2.269	-1.485	-1.653	-0.07096	-0.9362	-0.3952	-0.7679
SeqBias: GCW-triplet	GCWGCWGCWGCW	-2.525	-0.6456	-0.6301	-2.626	-0.06767	-0.0473	-0.2914	-0.6528
HIF2a(HLH)/785_O-HIF2a-ChIP-Seq(GSE34871)/Homer	GCACGTACCC	-0.9448	-2.271	-1.022	-1.859	-0.006632	-1.349	-0.1467	-1.976
FHY3(FAR1)/Arabidopsis-FHY3-ChIP-Seq(GSE30711)/Homer	HHCACGCGCBTN	-0.8466	-1.777	-2.311	-0.7569	-0.1878	-2.375	-1.57	-0.2424
SeqBias: CG bias	SSSSSSSSSS	-1.209	-1.102	-1.812	-4.837	-0.9706	-0.1871	-0.2804	-0.9831
bZIP:IRF/Th17-BatF-ChIP-Seq(GSE39756)/Homer	NAGTTTCABTHTGACTNW	-1.019	-0.1953	-1.088	-0.1026	-1.11	-0.1464	-2.352	-0.06508
GAGA-repeat/SacCer-Promoters/Homer	CTYTCTYTCTCTCTC	-1.291	-0.1136	-1.311	-0.7347	-1.474	-0.03736	-0.6242	-0.6749
HIF-1a(HLH)/MCF7-HIF1a-ChIP-Seq(GSE28352)/Homer	TACGTGCV	-0.5256	-0.4799	-5.651	-2.173	-0.8823	-0.2902	-1.424	-0.4074
MyoD(HLH)/Myotube-MyoD-ChIP-Seq(GSE21614)/Homer	RRCAGCTGYTSY	-1.174	-1.198	-3.186	-3.661	-0.31	-0.4575	-0.8561	-0.6859
SeqBias: G/A bias	RRRRRRRRRR	-0.4861	-0.4584	-3.634	-2.449	-1.461	-0.1944	-2.473	-0.007586
AP-2gamma(AP2)/MCF7-TFAP2C-ChIP-Seq(GSE21234)/Homer	SCCTSAGGSCAW	-2.452	-0.4192	-3.426	-1.495	-1.339	-0.1991	-2.689	-0.08008
MyoG(HLH)/C2C12-MyoG-ChIP-Seq(GSE36024)/Homer	AACAGCTG	-1.975	-2.839	-5.763	-8.942	-0.3965	-0.5847	-0.6144	-0.7476
SEP3(MADS)/Arabidoposis-Flower-Sep3-ChIP-Seq/Homer	CCAAAAAGGG	-0.000627	-0.000511	-0.000736	-0.01598	-0.7992	-0.3252	-0.1675	-1.962
Srebp1a(HLH)/HepG2-Srebp1a-ChIP-Seq(GSE31477)/Homer	RTCACSCCAY	-1.819	-1.95	-1.373	-1.391	-0.02107	-1.657	-0.3925	-0.8424
Nkx3.1(Homeobox)/LNCaP-Nkx3.1-ChIP-Seq(GSE28264)/Homer	AAGCACTTAA	-3.354	-1.523	-1.014	-5.232	-0.151	-0.1142	-0.04207	-3.169
Unknown6/Drosophila-Promoters/Homer	AATTTTAAAA	-3.531	-0.5298	-2.381	-0.3204	-0.5794	-0.06083	-1.467	-0.3014
Tbox:Smad/ESCd5-Smad2_3-ChIP-Seq(GSE29422)/Homer	AGGTGHCAGACA	-1.366	-1.357	-0.2778	-1.702	-0.006185	-1.437	-0.05415	-3.872
MafA(bZIP)/Islet-MafA-ChIP-Seq(GSE30298)/Homer	TGCTGACTCA	-1.817	-2.426	-0.5531	-2.72	-0.00968	-0.9539	-0.09609	-2.586
Atf4(bZIP)/MEF-Atf4-ChIP-Seq(GSE35681)/Homer	MTGATGCAAT	-1.209	-1.176	-2.17	-4.479	-0.3997	-0.789	-0.625	-0.8419
HNF6(Homeobox)/Liver-Hnf6-ChIP-Seq(ERP000394)/Homer	NTATYGATCH	-2.047	-3.007	-1.523	-1.784	-0.03626	-1.034	-0.5685	-1.001
SeqBias: C/A-bias	MMMMMMMMMM	-0.6942	-0.8015	-1.231	-1.924	-0.2701	-0.5716	-0.7455	-0.3376
RUNX2(Runt)/PCa-RUNX2-ChIP-Seq(GSE33889)/Homer	NWAACCACADNN	-0.4418	-0.6316	-0.04471	-0.2449	-0.007785	-1.165	-0.07644	-2.427
EFL-1(E2F)/cElegans-L1-EFL1-ChIP-Seq(modEncode)/Homer	TGCAARYGCGCTCYA	-0.6991	-0.1269	-3.219	-1.053	-3.098	-0.1225	-2.308	-0.1026
Gfi1b(Zf)/HPC7-Gfi1b-ChIP-Seq(GSE22178)/Homer	MAATCACTGC	-0.2608	-0.07505	-1.66	-1.411	-1.696	-0.1431	-1.488	-0.215
Oct2(POU/Homeobox)/Bcell-Oct2-ChIP-Seq(GSE21512)/Homer	ATATGCAAAT	-0.1108	-1.381	-1.677	-0.5235	-0.3515	-1.333	-0.8603	-0.5612
Znf263(Zf)/K562-Znf263-ChIP-Seq(GSE31477)/Homer	CVGTSCTCCC	-0.904	-2.024	-3.107	-1.937	-0.2766	-0.7828	-1.629	-0.3375
GEI-11(Myb?)/cElegans-L4-GEI11-ChIP-Seq(modEncode)/Homer	CCGACAYYTYACGGG	-0.6607	-0.004701	-0.3081	-0.2783	-1.431	-0.0236	-0.8614	-0.4713
ERE(NR/IR3)/MCF7-ERa-ChIP-Seq(Unpublished)/Homer	VAGGTCACNSTGACC	-3.597	-0.04303	-0.0757	-0.2075	-0.2555	-0.01048	-0.5829	-0.7079
GLI3(Zf)/GLI3-ChIP-Chip(GSE11077)/Homer	CGTGGGTGGTCC	-0.004831	-0.3553	-0.01902	-0.02265	-0.04669	-2.244	-0.3098	-1.102
Egr2/Thymocytes-Egr2-ChIP-Seq(GSE34254)/Homer	NGCGTGGGCGGR	-1.138	-2.006	-0.4163	-2.537	-0.01227	-1.43	-0.1231	-1.743
Ap4(HLH)/AML-Tfap4-ChIP-Seq(GSE45738)/Homer	NAHCAGCTGD	-4.47	-2.104	-5.122	-6.006	-0.3767	-0.2013	-0.5799	-0.7005
AARE(HLH)/mES-cMyc-ChIP-Seq/Homer	GATTGCATCA	-0.2102	-0.7591	-0.5054	-3.377	-0.3063	-1.847	-0.2492	-1.665
LXRE(NR/DR4)/BLRP(RAW)-LXRb-ChIP-Seq(GSE21512)/Homer	RGGTTACTANAGGTCA	-1.529	-1.812	-0.9589	-1.88	-0.08592	-0.69	-0.466	-1.143
GRHL2(CP2)/HBE-GRHL2-ChIP-Seq(GSE46194)/Homer	AAACYKGTTWDACMRGTTTB	-0.1468	-2.192	-2.836	-5.18	-0.07789	-2.769	-0.517	-0.6761
Nr5a2(NR)/mES-Nr5a2-ChIP-Seq(GSE19019)/Homer	BTCAAGGTCA	-0.4164	-0.1848	-0.1166	-0.4442	-0.08009	-0.5479	-0.2648	-1.571
PR(NR)/T47D-PR-ChIP-Seq(GSE31130)/Homer	VAGRACAKNCTGTBC	-1.225	-2.318	-0.7751	-2.376	-0.02306	-0.9291	-0.2977	-1.09
RBPJ:Ebox/Panc1-Rbpj1-ChIP-Seq(GSE47459)/Homer	GGGRAARRGRMCAGMTG	-1.845	-0.67	-1.793	-1.245	-0.1332	-0.655	-0.6683	-0.4698
IRF4(IRF)/GM12878-IRF4-ChIP-Seq(GSE32465)/Homer	ACTGAAACCA	-0.4815	-4.162	-3.198	-0.8332	-0.01703	-4.167	-1.619	-0.19
E2A-nearPU.1(HLH)/Bcell-PU.1-ChIP-Seq(GSE21512)/Homer	NVCACCTGBN	-0.3303	-0.1009	-0.09658	-3.073	-0.3707	-0.2191	-0.03773	-2.862
Pho4(bHLH)/Yeast-Pho4-ChIP-Seq(GSE29506)/Homer	AAGCACGTGBGD	-0.286	-0.7846	-9.868	-4.301	-1.608	-0.5744	-3.151	-0.03734
GATA:SCL/Ter119-SCL-ChIP-Seq(GSE18720)/Homer	CRGCTGBNGNSNNSAGATAA	-0.5493	-2.21	-2.111	-1.014	-0.197	-1.546	-2.048	-0.1383
Nr5a2(NR)/Pancreas-LRH1-ChIP-Seq(GSE34295)/Homer	BTCAAGGTCA	-0.6186	-0.3001	-0.06058	-0.09481	-0.02593	-1.226	-0.2724	-1.595
RUNX-AML(Runt)/CD4+-PolII-ChIP-Seq(Barski et al.)/Homer	GCTGTGGTTW	-0.7049	-0.4716	-0.4039	-1.805	-0.03006	-0.7032	-0.06537	-2.535
Pitx1(Homeobox)/Chicken-Pitx1-ChIP-Seq(GSE38910)/Homer	TAATCCCN	-0.5372	-0.9967	-1.633	-0.7293	-0.4167	-0.9066	-0.8232	-0.4081
LIN-39(Homeobox)/cElegans.L3-LIN39-ChIP-Seq(modEncode)/Homer	ATGATTRATG	-0.348	-1.8	-0.4039	-0.5879	-0.02905	-0.7116	-0.3586	-1.052
Pax7-long(Paired/Homeobox)/Myoblast-Pax7-ChIP-Seq(GSE25064)/Homer	TAATCHGATTAC	-2.547	-3.546	-0.2176	-0.296	-0.01709	-1.132	-0.4749	-0.7088
NFkB-p50,p52(RHD)/p50-ChIP-Chip(Schreiber et al.)/Homer	GGGGGAATCCCC	-1.474	-1.383	-0.4757	-2.847	-0.03272	-1.998	-0.2039	-1.645
Ik-1	NHTTGGGAATRCC	-0.472	-0.368	-0.4249	-1.547	-0.2891	-0.1544	-1.735	0
AR-halfsite(NR)/LNCaP-AR-ChIP-Seq(GSE27824)/Homer	CCAGGAACAG	-1.452	-4.828	-2.868	-7.216	-0.2758	-1.023	-0.3597	-0.9337
E2A(HLH)/proBcell-E2A-ChIP-Seq(GSE21978)/Homer	DNRCAGCTGY	-0.4422	-0.7799	-3.102	-6.959	-0.5789	-0.6725	-0.2885	-1.217
RUNX(Runt)/HPC7-Runx1-ChIP-Seq(GSE22178)/Homer	SAAACCACAG	-0.9894	-0.5005	-0.6165	-0.3146	-0.1177	-0.2841	-0.475	-1.019
Mef2c(MADS)/GM12878-Mef2c-ChIP-Seq(GSE32465)/Homer	DCYAAAAATAGM	-0.4094	-0.7107	-2.482	-0.3178	-0.6106	-1.07	-1.756	-0.2279
ZBTB33(Zf)/GM12878-ZBTB33-ChIP-Seq(GSE32465)/Homer	GGVTCTCGCGAGAAC	-0.4068	-0.2433	-2.041	-1.585	-2.115	-0.393	-1.103	-0.3672
ETS:E-box/HPC7-Scl-ChIP-Seq(GSE22178)/Homer	AGGAARCAGCTG	-1.463	-1.31	-1.639	-2.612	-0.126	-0.5534	-0.4917	-0.4813
SeqBias: CA-repeat	CACACACACA	-0.2856	-0.1424	-0.3678	-0.1165	-1.208	-0.1786	-0.4597	-0.8474
bHLHE40(HLH)/HepG2-BHLHE40-ChIP-Seq(GSE31477)/Homer	KCACGTGMCN	-0.004648	-0.7351	-0.782	-3.846	-0.1257	-1.791	-0.09167	-1.803
GATA-IR3(Zf)/iTreg-Gata3-ChIP-Seq(GSE20898)/Homer	NNNNNBAGATAWYATCTVHN	-0.4689	-1.681	-1.186	-1.502	-0.156	-0.542	-0.3609	-1.357
Unknown4/Arabidopsis-Promoters/Homer	CKTCKTCTTY	-0.3871	-0.4772	-0.03286	-0.01551	-0.006268	-0.7993	-0.3265	-1.387
GRE(NR/IR3)/A549-GR-ChIP-Seq(GSE32465)/Homer	NRGVACABNVTGTYCY	-1.865	-2.604	-0.6159	-3.27	-0.01571	-1.033	-0.15	-1.839
TATA-box/Drosophila-Promoters/Homer	CTATAAAAGCSV	-0.02222	-1.983	-0.6885	-0.08586	-0.3286	-3.2	-1.53	-0.2044
BMAL1(HLH)/Liver-Bmal1-ChIP-Seq(GSE39860)/Homer	GNCACGTG	-0.01104	-0.08196	-0.000368	-0.03731	-0.0224	-0.7825	-0.04055	-2.986
HOXA2(Homeobox)/mES-Hoxa2-ChIP-Seq(Donaldson et al.)/Homer	GYCATCMATCAT	-0.5886	-2.538	-0.248	-0.02457	-0.02165	-1.279	-0.5275	-0.8735
ZFX(Zf)/mES-Zfx-ChIP-Seq(GSE11431)/Homer	AGGCCTRG	-0.3166	-1.258	-0.5366	-0.186	-0.1753	-1.057	-1.388	-0.3385
ZNF711(Zf)/SH-SY5Y-ZNF711-ChIP-Seq(GSE20673)/Homer	AGGCCTAG	-0.2558	-0.8443	-0.02506	-0.08201	-0.12	-0.892	-0.1831	-1.915
ZNF143|STAF(Zf)/CUTLL-ZNF143-ChIP-Seq(GSE29600)/Homer	ATTTCCCAGVAKSCY	-0.08059	-4.951	-0.6939	-1.873	-0.002189	-4.54	-0.2389	-1.256
SeqBias: TA-repeat	TATATATATA	-0.02056	-0.5014	-0.7308	-0.05747	-0.06885	-1.068	-1.136	-0.3342
Nkx2.5(Homeobox)/HL1-Nkx2.5.biotin-ChIP-Seq(GSE21529)/Homer	RRSCACTYAA	-0.3206	-1.765	-0.9479	-4.026	-0.1632	-1.257	-0.1188	-2.443
E-box/Arabidopsis-Promoters/Homer	GCCACGTG	-0.2721	-1.205	-5.692	-7.684	-0.7441	-0.8655	-0.6588	-0.6383
c-Myc(HLH)/LNCAP-cMyc-ChIP-Seq(unpublished)/Homer	VCCACGTG	-0.2344	-0.9778	-3.123	-5.983	-0.4758	-0.7403	-0.3345	-1.05
CLOCK(HLH)/Liver-Clock-ChIP-Seq(GSE39860)/Homer	GHCACGTG	-0.4127	-1.112	-1.525	-5.799	-0.1646	-0.9644	-0.1682	-1.536
NF1:FOXA1/LNCAP-FOXA1-ChIP-Seq(GSE27824)/Homer	WNTGTTTRYTTTGGCA	-1.21	-1.553	-6.362	-9.156	-1.175	-0.4875	-0.6906	-0.4459
PIF5ox(bHLH)/Arabidopsis-PIF5ox-ChIP-Seq(GSE35062)/Homer	BCACGTGVDN	-0.01903	-0.1197	-0.002999	-0.1914	-0.0548	-1.195	-0.07796	-2.688
Rfx1(HTH)/NPC-H3K4me1-ChIP-Seq(GSE16256)/Homer	KGTTGCCATGGCAA	-0.4874	-1.305	-3.986	-4.63	-0.1632	-2.577	-0.6166	-0.7196
Egr1(Zf)/K562-Egr1-ChIP-Seq(GSE32465)/Homer	TGCGTGGGYG	-0.2962	-0.5375	-0.6925	-0.9276	-0.06413	-1.583	-0.3429	-0.846
Smad4(MAD)/ESC-SMAD4-ChIP-Seq(GSE29422)/Homer	VBSYGTCTGG	-0.5852	-1.807	-1.363	-1.801	-0.06978	-0.7241	-0.2797	-1.264
Pax7(Paired/Homeobox)/Myoblast-Pax7-ChIP-Seq(GSE25064)/Homer	TAATCAATTA	-1.932	-1.2	-0.5879	-1.268	-0.231	-0.307	-0.5768	-0.5289
CRX(Homeobox)/Retina-Crx-ChIP-Seq(GSE20012)/Homer	GCTAATCC	-1.489	-1.142	-2.954	-1.525	-0.5863	-0.4934	-1.065	-0.3023
PAX5(Paired/Homeobox)/GM12878-PAX5-ChIP-Seq(GSE32465)/Homer	GCAGCCAAGCRTGACH	-1.541	-0.3459	-2.495	-3.132	-0.2688	-0.3889	-0.5377	-0.9315
Rfx5(HTH)/GM12878-Rfx5-ChIP-Seq(GSE31477)/Homer	SCCTAGCAACAG	-0.01466	-0.05508	-0.7877	-0.3373	-1.283	-0.9318	-1.72	-0.2992
MafK(bZIP)/C2C12-MafK-ChIP-Seq(GSE36030)/Homer	GCTGASTCAGCA	-1.914	-0.6873	-0.184	-0.5081	-0.06675	-0.4195	-0.4641	-1.515
Nkx2.1(Homeobox)/LungAC-Nkx2.1-ChIP-Seq(GSE43252)/Homer	RSCACTYRAG	-1.144	-1.273	-0.4987	-0.907	-0.1788	-0.5789	-0.3715	-1.178
NPAS2(HLH)/Liver-NPAS2-ChIP-Seq(GSE39860)/Homer	KCCACGTGAC	-0.1241	-0.01023	-0.4835	-0.5759	-1.226	-0.1013	-0.7345	-0.497
p63(p53)/Keratinocyte-p63-ChIP-Seq(GSE17611)/Homer	NNDRCATGYCYNRRCATGYH	-0.1369	-0.5038	-0.8149	-0.1335	-0.1065	-1.695	-1.086	-0.3211
REST-NRSF(Zf)/Jurkat-NRSF-ChIP-Seq/Homer	GGMGCTGTCCATGGTGCTGA	-3.882	-2.003	-0.3663	-2.241	-0.03347	-0.574	-0.09387	-1.688
TCFL2(HMG)/K562-TCF7L2-ChIP-Seq(GSE29196)/Homer	ACWTCAAAGG	-1.006	-3.38	-1.023	-0.3083	-0.1491	-2.111	-1.476	-0.25
n-Myc(HLH)/mES-nMyc-ChIP-Seq(GSE11431)/Homer	VRCCACGTGG	-0.007151	-0.04606	-0.007186	-0.1503	-0.1757	-0.9993	-0.1523	-1.707
OCT4-SOX2-TCF-NANOG((POU/Homeobox/HMG)/mES-Oct4-ChIP-Seq(GSE11431)/Homer	ATTTGCATAACAATG	-0.08968	-0.02547	-0.08142	-0.02898	-0.6838	-0.5655	-0.3531	-0.8999
Rfx2(HTH)/LoVo-RFX2-ChIP-Seq(GSE49402)/Homer	GTTGCCATGGCAACM	-0.4578	-0.4002	-2.001	-5.317	-0.8559	-1.236	-0.2628	-1.427
p53(p53)/mES-cMyc-ChIP-Seq(GSE11431)/Homer	ACATGCCCGGGCAT	-1.211	-1.623	-1.902	-0.6261	-0.3515	-1.325	-1.914	-0.1357
ARE(NR)/LNCAP-AR-ChIP-Seq(GSE27824)/Homer	RGRACASNSTGTYCYB	-0.6484	-0.1642	-0.02305	-0.3359	-0.07546	-0.3491	-0.1575	-1.86
CTCF-SatelliteElement/CD4+-CTCF-ChIP-Seq(Barski et al.)/Homer	TGCAGTTCCMVNWRTGGCCA	-0.9507	-1.943	-1.495	-2.484	-0.2737	-0.702	-1.061	-0.4176
PCF/Arabidopsis-Promoters/Homer	NNWWWTGGGCYTDDN	-0.06002	-1.213	-1.159	-0.4349	-0.2657	-1.838	-1.499	-0.303
Smad2(MAD)/ES-SMAD2-ChIP-Seq(GSE29422)/Homer	CTGTCTGG	-0.4283	-2.295	-2.148	-2.053	-0.07688	-1.399	-0.5496	-0.6451
RFX(HTH)/K562-RFX3-ChIP-Seq(SRA012198)/Homer	CGGTTGCCATGGCAAC	-0.4116	-0.9392	-1.51	-8.058	-0.2886	-3.106	-0.1509	-1.831
Max(HLH)/K562-Max-ChIP-Seq(GSE31477)/Homer	RCCACGTGGYYN	-0.00047	-0.09569	-0.01488	-0.08198	-0.1461	-1.463	-0.1929	-1.859
Pax8(Paired/Homeobox)/Thyroid-Pax8-ChIP-Seq(GSE26938)/Homer	GTCATGCHTGRCTGS	-0.004106	-0.4158	-1.452	-1.686	-0.1795	-3.782	-0.8029	-0.6353
Unknown1/Arabidopsis-Promoters/Homer	RGGGTAWWWTHGTAA	-0.5793	-2.346	-1.305	-0.1077	-0.2381	-1.236	-2.432	-0.05122
SFP1/SacCer-Promoters/Homer	DDAAAAATTTTY	-0.2733	-0.3876	-0.07754	-0.1109	-0.4031	-1.131	-0.9578	-0.3702
GATA-DR4(Zf)/iTreg-Gata3-ChIP-Seq(GSE20898)/Homer	AGATGKDGAGATAAG	-0.04481	-1.009	-0.9057	-0.5788	-0.07403	-2.79	-1.062	-0.5353
X-box(HTH)/NPC-H3K4me1-ChIP-Seq(GSE16256)/Homer	GGTTGCCATGGCAA	-0.1912	-1.306	-3.329	-4.701	-0.1833	-3.1	-0.648	-0.6402
Pho2(bHLH)/Yeast-Pho2-ChIP-Seq(GSE29506)/Homer	CCCACGTGCT	-0.000415	-0.4032	-0.4436	-0.2158	-0.1332	-2.425	-0.8408	-0.5522
GATA-DR8(Zf)/iTreg-Gata3-ChIP-Seq(GSE20898)/Homer	AGATSTNDNNDSAGATAASN	-0.01557	-0.02584	-0.000864	-0.04266	-0.3012	-0.3944	-0.03365	-3.528
c-Myc/mES-cMyc-ChIP-Seq(GSE11431)/Homer	VVCCACGTGG	-0.001467	-0.09057	-0.04379	-0.0558	-0.1498	-1.46	-0.5153	-0.8752
CES-1(Homeobox)/cElegans-L1-CES1-ChIP-Seq(modEncode)/Homer	AAATTSAATTTN	-0.03391	-1.559	-3.786	-0.1029	-0.4282	-2.38	-4.488	-0.01487
FOXA1:AR/LNCAP-AR-ChIP-Seq(GSE27824)/Homer	AGTAAACAAAAAAGAACAND	-4e-06	-8e-05	-0.005872	-0.000395	-2.188	-0.7414	-0.2371	-1.233
RLR1?/SacCer-Promoters/Homer	WTTTTCYYTTTT	-7.1e-05	-0.000214	-4e-06	0	-0.0487	-1.535	-0.4316	-0.9732
TATA-box/SacCer-Promoters/Homer	BBHWTATATA	-0.000523	-0.001378	-6.5e-05	-2e-06	-0.6723	-0.5342	-0.2863	-1.353
GAGA-repeat/Arabidopsis-Promoters/Homer	CTCTCTCTCY	-0.01432	-0.1282	-0.004032	-0.002058	-0.1363	-1.014	-0.3611	-1.269
YY1(Zf)/Promoter/Homer	CAAGATGGCGGC	-0.001099	-0.2009	-0.005816	-0.000513	-0.08122	-1.479	-0.5261	-0.7959
RARg(NR)/ES-RARg-ChIP-Seq(GSE30538)/Homer	AGGTCAAGGTCA	0	0	0	0	-0.4874	-0.2904	-0.1228	-1.981
DREF/Drosophila-Promoters/Homer	AVYTATCGATAD	-0.6729	-0.5831	-0.7132	-0.9288	-0.2639	-0.6091	-0.4465	-0.8158
Pax7-longest(Paired/Homeobox)/Myoblast-Pax7-ChIP-Seq(GSE25064)/Homer	NTAATTDGCYAATTANNWWD	-0.005344	-0.004058	-0.03042	-0.000333	-1.95	-0.3257	-1.758	-0.07058
