# Supplementary material for: Microbiota modulate transcription in the intestinal epithelium without remodeling the accessible chromatin landscape
Source: HighWire-hosted journal article supplement (doi:10.1101/gr.165845.113), 2014-06-24
Supplement: Supplemental_TableS11.xlsx [file Supplemental_TableS11.xlsx]

## Sheet: Gene_Symbols
Table S11: Transcripts that are consistently up- or down-regulated in the ileum or colon in the presence of microbiota and their GO enrichments
ileum up (455)	Ileum down (941)	colon up (383)	colon down (326)
Spib	Dbp	B3galt5	Pex11a
Nfatc2	Nr1d2	H2-Eb1	P2ry4
Gata4	Klf15	Fermt3	Dhrs11
Runx3	Hlf	Clec4a1	Tmem202
Runx1	Tef	Cytip	Ms4a10
Eaf2	Pparg	Arntl	Rbp2
Dtx1	Ppara	Grap2	Leap2
Ets1	Nab2	Ccl20	Txnrd3
Skil	Bnip3	Pla2g3	Vnn1
Stat1	Thra	H2-Q8	Hkdc1
Barx2	Tsc22d1	Mfge8	Slc41a2
Ikzf2	Tcf23	Acap1	Prkg2
Tbx21	Egr1	Tnni1	Cideb
Arid3a	Lmo4	Nt5c1a	Hyi
Irf1	Nr1i3	Lgals3bp	Cndp2
Ripk3	Srebf1	Trpv6	Adh6a
Sp100	Mpnd	Muc1	Adh5
Nfil3	Foxn3	Slc28a3	Lrrc19
Atf3	Arnt2	Itgb2	Clcn5
Batf2	Cdr2	Unc93b1	Fahd1
Stat4	Zfp623	1700025G04Rik	Abp1
Ifi203	Mlxipl	Ccnb1	Gcnt2
Stat2	Nr1d1	2310079G19Rik	Fosl1
Irf8	Dmrt3	Card11	Ocm
Prdm1	Tcfcp2l1	Prkch	Gm1123
Ikzf1	Creb3l3	Slc30a10	Rai14
Ikzf3	Zfp764	Casp4	Mttp
Pla2g4c	Trib3	Tmprss13	Fxyd4
Ifit2	Tshz1	Fut9	Tbx3
Oas2	Nr2e3	Zc3h6	Neu1
S100g	Pbx1	C2	Tmigd1
Ifi44	Irf2	Wfdc2	Rbm47
Slc30a10	Fos	Mcpt2	Ostb
Usp18	Ppargc1a	Bhlha15	2210404O07Rik
Oasl2	Zfp787	D930048N14Rik	Mpp1
Mx2	Pcgf2	Oasl2	Mgat3
H2-DMb2	Zfp358	Hsh2d	Abcg2
Cd74	Zhx3	Oas1c	Pdzd3
Ccl5	Aff1	Cldn8	Hbegf
Cd177	Zfp655	Cpne2	Rasd2
Capg	Zmiz1	Slc35f2	Slc5a1
Oas3	Greb1	Fam46c	Gbe1
Ifitm3	Thrb	Chst14	Amn
Slfn5	Zfp354a	C630004H02Rik	Aldh1a7
Ifit3	Rfx2	Retnlb	Insrr
Fcho1	Pcbd1	Ctse	Lrat
Ifit1	Zkscan14	Robo2	Rabggtb
Zc3h12a	Maf	Arid3a	Arhgap27
Cyba	Nr3c2	St8sia5	AI747448
Ly6e	Hes6	Fcer1g	Dfna5
H2-Eb1	Sp5	Ang4	Akr1c18
Chac1	Tsg101	Lpxn	Apoc3
Phf11	Osr2	Rac2	Xpnpep2
Rtp4	Zfp467	Sp100	Mfap3l
Smpdl3b	Maml3	Pla2g2f	2010005H15Rik
Tgfb1	Satb2	Ifit3	Resp18
Akr1b8	Hdac5	Duox2	Aldob
Arhgap4	Ash2l	Crip2	Slc3a1
Psmb9	Mier3	Gbp2	Cyp2j6
C3	Grlf1	D330028D13Rik	Gypa
Cmah	E430018J23Rik	Apoe	Cyp3a13
Slfn2	Pax8	Rgs14	Treh
Muc4	Thap7	Hist1h2ae	1700019G17Rik
Mcpt1	Pou2f3	Sp140	Acta1
Tnf	Foxq1	Ccl5	Lrrtm1
C2	Nr0b2	Gzma	Ddx43
Cmtm7	Pnliprp2	Ly6g6e	St3gal5
Parp14	Reg4	Zc3h12a	Plk3
Unc93b1	Arg2	Svep1	Wnt5a
Cd8a	Cyp2d22	Vsig1	Rassf8
Derl3	Gsta3	A630001G21Rik	Cst6
Clu	Rbp4	Ctsz	Slc25a37
Glipr1	Gstt1	Expi	Ntn4
H2-T24	Cpne2	Gadd45g	Slc26a3
Parp3	Fah	Fndc5	Ccl25
Slfn4	Bex1	Gimap4	Sardh
Ckap4	St3gal6	Tnip3	Far2
Gpx2	1700025G04Rik	Ptprc	Gja1
Mlkl	1810046K07Rik	Gstt1	Slc7a8
Plek	Dcxr	Cbr2	Bst1
Cd48	Ttr	Hif1a	Ankrd12
Cnn2	4833442J19Rik	Arhgdib	Zfp759
H2-M3	Gstk1	Tcirg1	Ank
Apbb1ip	Cgref1	Cd48	Epb4.1l4a
P2rx7	Acsm3	Pla2g5	Ccrn4l
Casp4	Gamt	Tyrobp	Epdr1
Cd14	Alox5	Reg3b	Pstpip2
Gimap3	Gstm3	Srgn	AY761184
Camk4	Gstm1	Nmral1	Glrx
Thy1	Rgs13	Arhgdig	Bmp1
Trim6	Cldn8	Gpr114	Slc5a11
Areg	Insig1	Fam55b	Adk
Tnfrsf1b	Ppm1j	Pxdn	Aldh1a1
Cd274	Tpm2	Clca4	Slc8a1
Cd3e	Dap	B3gnt7	Kcnu1
Zdhhc15	Bok	P2rx7	Slc9a3r1
Tnfsf13b	Plekhf1	Fhl3	Pdzk1
Def6	Abpd	Notch4	Prr15
Socs1	Sorbs2	Prkcdbp	Ugdh
Vav1	Gchfr	Gsdmc2	H2-T3
Lck	Por	Rdh9	Iyd
AI467606	Athl1	Lama5	Itpripl2
Gmds	0610011F06Rik	H2-Aa	Akr1c13
Cd84	Aacs	Sash3	Gdpd2
Grap2	Sema7a	Parp3	Edn3
Cxcl10	Pros1	Ano1	Dgat1
Ccl20	Gstm7	Samhd1	Pcsk5
B3gnt5	Enc1	Cmah	Fmo5
Limd2	Naglu	Fcho1	Cxcl12
Gm1965	Gsta4	Gimap3	Cdkl1
Gpsm3	Fbln1	B3gnt5	Prmt6
Cd3d	Xylb	Cd37	Cyp27a1
Thpo	Mvk	Tnfsf10	Cntn3
Sema4d	Bbc3	Clca1	Mme
Tlr2	D630039A03Rik	Cd14	Tm6sf2
Unc5cl	Plk2	A230050P20Rik	Scnn1g
Fgr	Tubb2b	Tigit	Slc46a3
Arhgap9	Cpn1	Irf1	Zdhhc19
Slc35f2	Ppap2a	Gch1	9530008L14Rik
Serpinb9	Ltc4s	Slc16a12	Clec2e
Dapk2	Rras	Tmem37	3300002I08Rik
Gpr18	Rnd2	Hoxd13	Snora70
Ube2l6	Tmc7	Tead2	Hsd17b13
Cep55	Acads	C3	Ttyh3
Fyn	Rdh9	Rbm3	Gpr133
Fcamr	Fzd6	Ifi27l2a	Zbtb16
Zap70	Cryz	H2-DMb2	Zfp37
Rac2	Tcea3	Igfbp4	Bcl2l15
Pik3ap1	Cuedc1	Lat	Alpi
Lat	Csad	Iigp1	Olfm4
Slc9a9	Avpi1	Vill	Per3
Gimap1	Tagln2	Apbb1ip	Osbpl6
Inpp5d	Higd1a	Ddx60	Saa3
H2-Q8	D130043K22Rik	Dkkl1	Ercc2
Gch1	Hspb6	Reg4	Rab30
Rnf125	Phldb2	Mcpt1	Tubal3
Gramd1a	Agpat3	Ecscr	A430105I19Rik
Nkg7	Acbd4	Lpo	Ccbl1
Mical1	Aldh2	Tmed6	Spsb1
H2-T10	BC016495	Cyp2f2	Nlrp1b
Icam1	Kifc2	Arhgap4	Fabp1
Mcpt2	Phlda1	Aldh1l1	Osta
Rab8b	Sycn	Tap1	Eps8l2
Smpdl3a	Bcam	Cxcr4	Zbtb20
Gm2a	Lrp12	Oas2	Slc13a1
Ctsw	Entpd4	Acadl	Creb3l3
Gpr114	Tmem37	Stat1	Cry2
Efhb	Gas2l3	Gpr110	Slc10a2
Ero1lb	Sash1	Muc4	1700057G04Rik
Rassf4	Galk1	Cd8a	Suox
Cd96	Sfxn3	Phf11	Gmip
Slc28a3	Spa17	Slfn4	Slc27a2
Tm4sf1	Rtkn	Laptm5	Enpp7
Tlr1	Grcc10	Emp2	Abcg5
St6gal1	Ttll6	Dhx58	Thbd
Il2rb	Ramp1	Thpo	Tpk1
Itgae	Serf1	Fam83c	Coq10b
Zdhhc2	1700019D03Rik	Stat2	Myo1a
Ptprc	1190002H23Rik	Sema4d	Prss23
Cenpe	Fgfr3	Aqp4	Aspa
Sval1	Slc16a11	Stxbp1	Slc16a5
Traf1	Zc3h6	Apobec3	Amigo2
Cd44	Nudt1	Trim40	Tfpi2
Klrd1	Slc25a10	Cmpk2	Mfsd8
Fmnl1	Krt23	Cd276	Snx15
Map4k1	Tbc1d8	Ccrl2	Hoxb4
Dusp6	Gstm2	Mcm5	Abcc2
Myl7	Rdh11	Slc9a9	Npc1l1
Dock11	Adcy5	Vtcn1	Gata5
Ccnd1	Hist1h2bc	Spna1	Ptprr
Ms4a4b	Akr7a5	Mfsd4	Xkr9
Parp9	Bckdha	Rilpl2	Agr3
Rgs10	Sepx1	Dtx3l	Tgfbi
Msn	Cib2	Cyba	Rpl39l
Gimap4	Rgnef	Reg3g	Pm20d1
Tac1	Frat2	Pcdh18	Cdkn1c
Fyb	Lss	Slfn2	Als2cr12
Pik3cg	Ilk	Bik	Fam13b
Hmmr	Nkd1	Nfil3	Galm
Cd7	Cyb5r3	Gsdmc4	Bmper
Cd3g	Megf9	Kremen2	Sepp1
Rassf5	Proz	H2-M3	Me3
H2-Q1	Fbp1	Trp53i11	Calml4
Cd247	Pnkd	Fmnl1	Slc17a4
Itgam	Zadh2	H2-Gs10	Slc9a2
Lyn	Mgll	Ifit2	Car8
Samhd1	Gpt2	Anxa3	Ckmt2
Sh3kbp1	Ccbl2	Gpx2	Krt222
Ms4a6c	Plscr2	Lgals12	Lct
Itgb7	Dhcr7	H2-Q6	Fabp2
Tnfsf10	Tst	Apobec2	Apoa4
Tbc1d10c	Abcb6	Rinl	Depdc7
Alpk1	2010012O05Rik	Irs1	Cyp2d11
Plekha2	Sh3rf2	Ifi27l2b	Rdh7
Insl6	Bmp8b	Steap4	Upk1a
Lpxn	Gas6	Ly6e	Nek3
Sass6	Dhrs3	Chad	Lancl3
H2-T23	Cdo1	Pear1	2010001E11Rik
Coro1a	Urod	Rbpms	Mep1a
Itgb6	Trim8	Oasl1	Slc27a4
Ppt1	1810031K17Rik	2010107G12Rik	Pcdh17
Arhgdib	Tmem14a	Pla2g4f	Gcom1
Nudt5	Smpx	Fads3	Cyp4f16
Tnfrsf14	Scrn3	Itgam	Zfyve9
Dennd1c	Capn9	Cd81	Prepl
Cd37	Phospho1	Prdx6	Plcd1
Atp8b2	Ube2e3	Ttyh1	1700011H14Rik
Lat2	Edn1	Pnliprp2	Acnat1
Prkch	Tmem53	Ms4a7	Sult1c2
Trp53inp1	Paqr7	St3gal6	Gpr172b
Tap2	Vav3	Prelp	Kbtbd11
Chsy1	Kcnma1	Gsdmd	Ankrd37
Itgb2	Abhd14b	Cd177	Zfyve20
Pigr	Tfpi	Ifit1	Slc2a9
Laptm5	Kcnh2	Tnf	Adap1
Tyrobp	Btd	Slfn5	Slc22a3
Ltb	Fgfr4	Ly6i	Cubn
Ildr1	Ehbp1	Cd74	Gcg
Fxyd5	Acss2	Nccrp1	2410017I17Rik
Cd160	Hps4	Ms4a4b	Tpbg
Cst7	Prune	Itga5	Zmat4
Psmb10	Gclm	Sulf2	Gramd1b
Fas	R3hcc1	Xaf1	Hpgd
Il2rg	Acot1	Smpdl3b	Otc
Zcchc11	Polg2	H2-Ab1	Sobp
Hcls1	Tmem159	Trf	Gcnt3
Hmha1	Ypel3	Ptges	Cyp2c66
Gimap7	Sytl1	Glipr1	Cobl
4932438A13Rik	Nek6	Uhrf1	Plekhg6
Rabl5	Slc27a1	Ddx58	Rfx2
Casp3	Btg2	Fcamr	Fkbp5
Asah2	Fmo4	Nos2	Slc26a6
Cd72	Trub2	Nucb2	Ceacam18
Lmo2	Sgk3	Vwf	Slc17a5
Ptprcap	Rps6ka5	Cd52	Rnf152
Hvcn1	Def8	H2-DMb1	Khk
Dnajb3	Peli2	Fkbp11	Sv2c
Dnase1	Itga7	Irf5	Gm129
Ppm1h	Zfand2b	Pycr1	Bche
Atp8a1	Ppil6	Gbp3	Nts
1810065E05Rik	Grpel2	1810030J14Rik	Angptl4
Ppp3cc	Zfp462	Cd84	Coro2a
Arrdc4	Ell3	AI854703	Cyp4b1
Ext1	Aspscr1	Etv4	Cml5
Clic1	Nqo1	I830012O16Rik	Sord
Gatm	Plek2	Usp18	Sytl3
Lcp1	Ttll1	Psmb9	Cyp3a11
Slc16a3	Bicd1	Cd72	Mt1
Slc6a14	Acaa1b	Crisp3	Plscr4
Gpr160	Cacna1a	Ifitm3	Nags
Gimap6	Rtn4	Pion	Akr1c19
Fcer1g	Acy1	Rsad2	Cry1
Cd52	Slc16a13	Parp9	Sox6
Prom1	Ptpn21	Ube2l6	Lyz1
Ankrd44	Aqp1	Cmtm7	Dpp4
Tapbpl	Efna3	E130012A19Rik	Bend7
Apoc2	Adipor2	Fam149a	Slc2a5
Aldh4a1	Pter	1190003J15Rik	Slc5a4a
Gda	Ugt2b35	Sh3bp1	Bmp3
Slc9a3	Bcl2	Fzd9	Homer2
Il7	Fibp	Fam65b	Slc6a20a
Slc30a1	Slc19a2	Mmp14	Tppp
Lsp1	Coasy	2210010C17Rik	Tef
Xdh	Anxa11	Grpr	4930420K17Rik
Rgs1	2610528J11Rik	Gsdmc	Cyp2c65
Saa3	Nrg4	Slc1a1	Cacna1e
Gcnt1	Pigl	Cotl1	Calcb
Adh6a	Dusp12	Tgfb1	Nrn1
Ccl3	Cbr1	Spata6	Fzd3
Ly6d	Odc1	Tifa	Ankrd43
Fn1	Grhpr	Spink4	Gcnt1
Cd8b1	Usp53	Gzmb	Nostrin
Gbp4	Aadac	Lgals9	Alb
Ifitm1	Spsb4	Cd3e	Per2
Cd79b	Rgn	Ms4a6c	2310044G17Rik
Csf1r	Igf2r	Gsdmc3	Gabre
Cd6	Mmd	Itln1	2310004I24Rik
Ccr9	Fn3k	Oas3	Cyp4f14
Cd79a	Pxmp4	Tnfrsf1b	Ephx2
Grap	Slc26a11	Sdf2l1	Cdr2
Ccl4	Abhd6	Stom	Pdgfc
Tpx2	Cyp2j9	Casp14	Oaz3
F2r	Nt5c	Lyn	Acsl1
Sh2d2a	Dhfr	Nkg7	P2ry2
Akt3	Pcx	Igtp	Ppara
C1qb	Arrdc2	Slc41a1	Ugt8a
Pglyrp2	Srd5a2	Gatm	Pgap1
Il12rb2	Mettl7b	H2-T10	Cyp2u1
Slamf7	Grb7	Map4k1	Ier2
Pltp	Atp2b1	D18Ertd653e	Srr
Cxcr3	1110002B05Rik	Capg	Aldh3a2
Casp12	Hspa2	Unc119	Ap4s1
Asb2	Ambp	Derl3	Dpyd
Itgal	Arhgap18	Nt5e	Rab33a
9930013L23Rik	Abtb1	Il18	Mep1b
Il27ra	Dmpk	Duoxa2	Egr1
Cxcr6	Kcnj2	H2-DMa	Edn2
Traf3ip3	Ehhadh	Celsr1	Cfl1
Ppp1r16b	Rnase1	Lyz2	Ghr
St8sia4	Fdx1	Limd2	Wee1
Rcsd1	S100a6	Clu	Per1
Adam19	Pvr	Tbc1d10c	Ugt2b36
Sla2	Tmem86b	Cyth4	Fos
Itga4	Pcyt2	Fes	Tex9
Cd69	Trpm6	Cyp2d22	Dbp
Kcnab2	Slc30a2	Clic6	Slc34a2
Pla2g7	Hint1	Slc37a2	Epb4.1l3
Was	Il15	Coro1a	Btnl2
Cd200r1	Tenc1	Nfkbiz	Fhl1
Slitrk6	Abcb1a	Bst2	Prlr
Cd244	H2afv	Rtp4	Tfrc
Gpr132	Ccdc101	S100g	Sgk1
Spn	Thoc7	Irgm1	Tm4sf5
Parp8	Osgepl1	Khdc1a	Agpat9
Il21r	Atrnl1	D14Ertd668e	Fosb
Rasgrp1	Arl14	BC021614	Frmd3
Duoxa1	Hunk	Gjb2	Sstr1
Ptgs2	1700029G01Rik	Mx2	Qdpr
Stk32c	Scrn2	Hist1h1a	Fhit
Lcp2	Camk1d	Sod3	Osr2
Cd53	Gls	Slc7a5	Cck
Gpr68	Btbd6	6030429G01Rik	Dak
Itk	Tcn2	D630039A03Rik	Slc22a4
Parvg	Angpt2	Mical1	Lgals2
Klk8	Pja1	Ifi44	Isx
Cyfip2	BC017647	Tor3a	Fabp6
Itgax	Timp3	Slc36a1
Fasl	Siae	9030619P08Rik
4930503L19Rik	Hacl1	Pglyrp1
Lag3	Slc18a1	Pla2g4c
Adcy7	Tacc2	Ckap4
Fgf15	Sphk2	Msn
Gng2	Wdr45	Ets1
Emb	Pmm1	Ephb6
Dock2	Arl13b	Nox1
Dock10	Fasn	H2-T24
Myo1g	2610029I01Rik	Tmem173
Gbgt1	Adh1	Def6
Ncf4	Mpst	Npy1r
Tnfaip2	Glud1	Ass1
Napsa	Insr	S100a14
Sema6d	3110070M22Rik	Pik3ap1
4632428N05Rik	1110007C09Rik	Zbp1
Sla	Aldoc	Mvd
Txk	Slc5a4a	Plvap
2410076I21Rik	Atp6v0e2	Plk1
Sh2d1b1	Idh1	Gna14
Btk	Cda	Irf7
Il18r1	Fbxl3	Rec8
Arhgap30	Mlycd	Sectm1a
Nckap1l	Mterfd3	Fgr
Nxf7	Phf17	Ceacam10
Myo1f	Snx7	Pdzd7
Gpr171	Slc6a4	Fads1
Csf2rb2	Lmna	Lpcat1
Klrb1a	Pacsin2	Cnn2
Ms4a6b	Scin	Parp14
Pde11a	Hexb	Plek
Glp1r	Arsg	Cited4
Lrrc8c	Gng11	Chac1
Arhgef6	Ophn1	Smtn
Serpinb6b	Ank3	Aqp8
Acot12	Arl4d	Mlkl
Plb1	Rhobtb3	Hpn
Gsdmc4	Acaa1a	Ccr10
Gsdmc2	Pipox	Mybl1
Gbp3	Cpe	Fkbp1b
H2-DMb1	Scd1	Ckb
H2-Aa	Dusp23	Cd274
Dhx58	Zcchc14	Hoxd12
Bst2	Mgst3	Oas1b
Apobec3	Plekha8	Apaf1
Trim40	Cml1	Capn13
Dtx3l	Vwa1	Trim6
Arhgap8	Ccs	Psmb8
Capn13	Wnk4	E330009J07Rik
Clec4a1	Pygl	Ifi35
Tmem173	1600014C10Rik	Pla2g2a
Sec11c	Commd1	Vav1
Mfsd4	Myo18a	Cxcl16
Akna	Dgkg	Plcd3
Amica1	Tmem86a	Prc1
Skap2	Lsm1	Cxcl10
Gimap8	Uap1l1
Psme2	Mmp15
Selplg	Eef2k
Rnf19b	Pik3r2
Cd27	Leap2
Srgn	Disp2
AA467197	Cachd1
Mcart6	Scnn1a
BC051142	Sirt5
Tc2n	Ncoa7
Dennd4a	Ube2e2
Slc28a2	Asb7
Mpeg1	Tm4sf4
Gpr55	Vat1
4933416I08Rik	Gclc
Ptpn7	Cdipt
Tagap	Cln5
Ncf1	Pex1
Fcrl5	Gal3st1
Sprr2b	Abat
Pip4k2a	Kcnf1
Tnfaip8l3	Ryk
Csf2rb	Osbpl3
Hsd17b6	Prkcz
Reg3g	Reep6
Retnlb	Cyp4f15
Gzmb	Fbxl4
Ceacam10	Dhcr24
H2-DMa	Ebpl
Gzma	Hexdc
Nfkbiz	Lsm14b
Gbp2	Hist1h1c
Nos2	Tmem59
Zbp1	Wbscr27
1810030J14Rik	Cyp2s1
Il18	3632451O06Rik
Tat	Ireb2
B3galt5	Pgrmc1
Psmb8	Ppcs
Trim15	Acpl2
Pla2g5	Slc25a4
Apaf1	Pck1
Cd38	Gpam
Hk2	Ankrd57
Fut2	Dnajb7
Chst4	Atxn1
2210407C18Rik	Dnase1l1
Steap1	Map1lc3a
Prss27	Nudt7
Socs3	Nudt12
Tgm2	Slc22a1
Ubd	Pde8a
Dmbt1	Hsd17b4
B3gnt7	Sod1
Stom	Ptprg
Upp1	Slc6a7
Ptk6	Fgfrl1
Hspa1a	Akr1c14
Slc40a1	Chst8
Saa1	Tmem143
Saa2	Adss
Igj	P2ry1
Cfi	Mtmr7
Pfkfb3	Slc44a3
Hemt1	Abcd3
Duoxa2	Mccc1
Igtp	Prkaa2
Duox2	Rap2a
H2-Ab1	Abhd1
Tap1	Ensa
Nox1	Immp2l
Bhmt	Fzd8
	Slc4a2
	Ddc
	Eif2c2
	Dcun1d4
	Slc37a4
	Ppp2r5d
	Sdad1
	Trpm4
	Stard4
	Cyp4f13
	Pfn2
	Pmp22
	Rmnd5a
	Fzd4
	Sephs2
	Vps33b
	Tmem135
	Capn1
	Phyh
	L2hgdh
	Fbp2
	Krt12
	Slc5a11
	Slc35e3
	Cth
	Tinag
	Tmem98
	Sult1d1
	Tesk2
	Igsf3
	Acot4
	Kctd6
	Gas2
	Apbb2
	Lnx1
	Guca2a
	Hdac11
	Nudt4
	Guca2b
	Stxbp5
	Faah
	Acox2
	Ctdspl
	2010011I20Rik
	AI462493
	1110031I02Rik
	Tmem41a
	Aqp11
	Tmem144
	Ppp2r5b
	Ppm1a
	Nit2
	Slc20a1
	Tmem160
	Fchsd2
	9030617O03Rik
	Ccdc120
	Akap7
	Car1
	Ghr
	Acy3
	Ccdc64
	Rnf167
	Papss1
	Slc30a4
	Acaa2
	Plscr1
	Cd302
	Large
	Degs2
	Slc25a17
	Insrr
	Sos2
	Ugt2b34
	Neu2
	Sqrdl
	Vti1b
	Btbd3
	Egln3
	Cyp3a11
	Dact2
	Cyp27a1
	Mertk
	B4galnt1
	Them4
	Pgm2
	Oplah
	Arhgef19
	Cidec
	Ugt2b37
	Abcc6
	Pink1
	Cfb
	Acvr2a
	Atg16l2
	5730469M10Rik
	Cpm
	Bcmo1
	Chchd7
	Pam
	Acbd5
	Crat
	Iapp
	Rtcd1
	Abcc5
	Aldh6a1
	Sap30l
	Entpd5
	2810408A11Rik
	Gpr133
	Plekha1
	Inpp5a
	Spr
	Tlcd1
	Trak1
	Tmem106a
	Rnf32
	Fmo1
	Sesn1
	Ahnak
	Lamb3
	Adk
	Sacm1l
	Acp6
	Errfi1
	Dhrs4
	Sgk2
	Maob
	Bmp8a
	Cyp2c65
	1810020D17Rik
	Slc27a2
	Rhebl1
	Plekhh1
	Oxsm
	Adamtsl5
	Msra
	Naprt1
	Snapc5
	Dock1
	Akr1e1
	Tlr5
	2310067B10Rik
	F3
	Oat
	Slc5a6
	Gab1
	Map3k6
	Akr1c12
	Igsf9
	Dpep1
	Bphl
	Hagh
	Cables1
	Mocs2
	Selenbp2
	Eps8l3
	Ndrg1
	Galnt11
	Maoa
	Gadd45a
	Lrrc8b
	Ank
	Pank3
	Sema3c
	Hsd11b2
	Tprkb
	Rhbg
	Inadl
	Hyi
	Cnksr3
	Srd5a1
	Prkag2
	Krt222
	Epha1
	Rab4a
	Pdxk
	Ppm1l
	1600021P15Rik
	D730039F16Rik
	Ngef
	Sigirr
	B4galt6
	Bmp2
	Slc16a10
	Selenbp1
	Ppl
	Pdk2
	Ms4a10
	Aldh3a2
	Cyp4f16
	Rdh1
	Qdpr
	Mosc2
	Pepd
	Sytl3
	Ppp1r14a
	2810405K02Rik
	Slc17a5
	Rai14
	Acsl1
	Akr1c13
	Acvr1c
	Sult1c2
	Pgm1
	Lrrc19
	Slc5a4b
	Rab33a
	Fahd1
	Fhl1
	Fmo5
	Baat
	Slc2a9
	Zfyve9
	Slc7a15
	Ptger3
	Cat
	Galm
	P2ry2
	1700057G04Rik
	Homer2
	Sardh
	Angptl4
	Nek3
	Slc13a2
	Cyp2u1
	Akr1c19
	Khk
	Ilvbl
	Ceacam18
	Slc15a1
	9530008L14Rik
	Pdk4
	Ggt1
	Pcsk5
	Slc16a5
	Gramd1b
	Me3
	Hpgd
	Rasd2
	Gpr172b
	Ntn4
	Kcnu1
	Clec2e
	Clcn5
	2310044G17Rik
	Slc7a8
	Amn
	Osbpl6
	Depdc7
	Rdh7
	Abp1
	Sord
	Rab30
	Plekhg6
	Calcb
	Cry2
	Ankrd43
	Neu1
	Cyp2j6
	Prkg2
	Per3
	Slc2a5
	Slc22a3
	Slc25a37
	2310004I24Rik
	Abcc2
	Edn2
	Ccbl1
	Tfpi2
	Hkdc1
	Aldh1a7
	Plscr4
	Fkbp5
	Dpyd
	Gbe1
	Fabp2
	Aldh1a1
	Zmat4
	Bmp1
	Cobl
	Tm4sf5
	Hsd17b13
	Mep1a
	Bche
	Mt1
	Ephx2
	Prss23
	Frmd3
	Gm129
	Lrat
	Alpi
	Cndp2
	Slc22a4
	Tmigd1
	Xpnpep2
	Fabp1
	Reg3a
	Apoc3
	Treh
	Mt2
	Nrn1
	Rbp2
	Cml5
	Mme
	2010106E10Rik
	Cubn
	Cyp2d26
	Cyp4b1
	Slc13a1
	Slc6a19
	Scd2
	Aco1
	Fmo2
	Cyp2c44
	Ky
	Myl9
	Apcdd1
	Efhd1
	Des
	Ddit4l
	Vwce
	8430419L09Rik
	Cxcl11
	Slc34a3
	Ppef2
	Grin2a
	Syt17
	Cyp17a1
	1700016C15Rik
	Gpr155
	Smcp
	Prkag3
	1100001G20Rik
	Tagln
	Accn5
	Slc23a1
	Otop2
	Asz1
	Lect2
	Fbxl16
	Kcnj8
	Aqp3
	1700109H08Rik
	Fbxl21
	Slc14a1
	Npl
	Cxxc4
	Slc7a2
	Atp7b
	Fras1
	Pcdh19
	Cndp1
	Ankrd29
	Pnliprp1
	Igf2
	Plg
	Abca8b
	Susd2
	Sucnr1
	Lrrn1
	Ccbe1
	Mapk4
	Podn
	Akp3
	Ugt2a3
	Il1rl1
	Ereg
	Sorcs3
	Tchh
	Cml2
	Plod2
	Aqp7
	Cyp2e1
	Cyp1a1
	Slc5a12
	Serpina1b
	1500012F01Rik
	9130230L23Rik
	1700024P16Rik
	4930520O04Rik
	Gstm6
	Slc25a45
	Tppp3
	Retsat
	Ihh
	Agt
	Ccrl1
	Tnfsf15
	Afap1l1
	Krba1
	Tmem174
	Rcan1
	Pin4
	Sgms2
	Serf2
	Tmem38a
	Defb40
	Map3k13
	Lipa
	Synj2bp
	1110001A16Rik
	Snrpn
	Ankrd9
	Ptms
	Mex3b
	Gsta2
	Adam4
	Rell1
	Slc25a42
	Aktip
	Sult1a1
	Acad11
	Hgsnat
	Enox2
	Bnip3l
	Gk5
	Ccdc90a
	Tmem125
	Kcnh6
	Chmp1a
	Cmtm4
	Gpx4
	Lonp2
	Pcmtd2
	Rp9
	Slc36a4
	Cmbl
	St6galnac2
	Eif2c4
	0910001L09Rik
	Tsku
	Cyp2d40
	Atg9a
	Dsel
	Sec16b
	Hpdl
	C130074G19Rik
	Trdmt1
	Osbpl1a
	Akap2
	Csnk2a1
	Polr3g
	Macrod1
	Cyp2c68
	Golim4
	Dclk3
	Rev1
	Rundc3b
	Anxa13
	Mpzl2
	1700001L05Rik
	Flrt3
	Mpzl3
	Mfsd9
	Baiap2l2
	Hsd17b11
	Agr3
	Slc47a1
	Cyp4v3
	Pdzk1
	Epdr1
	Ugt2b36
	Defb37
	Tpbg
	Prr15
	H2-Bl
	Fhit
	Ocm
	Cyp2d10
	Cdkl1
	Cyp2c66
	Olfr165
	Iyd
	Bmp3
	0610008F07Rik
	1700017D01Rik
	Olfr1393
	1700026J04Rik
	Sfrp5
	Dsg4
	Samd5
	9130019P16Rik
	Serpina1c
	Cpvl
	Pcp4

## Sheet: GO_Ileum_Up
Table S11: Transcripts that are consistently up- or down-regulated in the ileum or colon in the presence of microbiota and their GO enrichments
Category	Term	Count	%	PValue	Genes	List Total	Pop Hits	Pop Total	Fold Enrichment	Bonferroni	Benjamini	FDR
GOTERM_BP_FAT	GO:0006955~immune response	73	1.84576	5.04318e-38	CD8A, IL18, TLR1, TLR2, TGFB1, CXCL10, TMEM173, PGLYRP2, OASL2, CFI, FAS, MX2, LTB, ICAM1, NCF1, SLA2, H2-DMB1, TNFRSF14, FCAMR, H2-DMB2, C1QB, LAT2, TNFSF13B, H2-AA, GBP4, GBP3, GBP2, LCP1, CCL3, TNF, C3, OAS3, OAS2, CCL5, CCL4, CD74, RNF125, TNFRSF1B, CCL20, TAP2, TAP1, FCER1G, H2-T10, FASL, C2, INPP5D, DHX58, CD27, CD7, PTPRC, IL18R1, CD8B1, H2-M3, IL7, IGJ, H2-Q1, SAMHD1, MYO1F, H2-AB1, VAV1,…	328	471	13588	6.42072	9.77872e-35	9.77872e-35	8.63948e-35
GOTERM_BP_FAT	GO:0002684~positive regulation of immune system process	40	1.01138	3.68346e-24	ITGAL, IL27RA, C3, IL18, TBX21, CD247, UNC93B1, TLR2, CD74, TGFB1, TAP2, ZAP70, FCER1G, IL2RG, CFI, INPP5D, C2, LAG3, CD27, SPN, PTPRC, LYN, H2-M3, IKZF1, CD3E, IL7, H2-Q1, H2-Q8, THY1, C1QB, CD38, CD37, CORO1A, LAT2, P2RX7, TNFSF13B, LCK, H2-AA, CD79B, CD79A, H2-DMA	328	206	13588	8.04404	7.14223e-21	3.57112e-21	6.31015e-21
GOTERM_BP_FAT	GO:0006952~defense response	53	1.34008	1.12788e-21	IL27RA, TLR1, TLR2, TGFB1, CXCL10, TMEM173, SAA2, CD44, SAA1, PGLYRP2, CFI, REG3G, NOS2, MX2, SPN, NFKBIZ, NCF1, SAA3, CHST4, CLIC1, C1QB, PLA2G7, H2-AA, CCL3, TNF, FGR, C3, TAC1, ITGB2, CCL5, CCL4, CD74, TNFRSF1B, CCL20, TAP1, ITGB6, FCER1G, C2, DHX58, FN1, IL18R1, PTPRC, H2-M3, H2-Q1, SAMHD1, MYO1F, H2-Q8, LSP1, LAT, P2RX7, IRF8, APAF1, CD14, F2R	328	448	13588	4.90094	2.18697e-18	7.28989e-19	1.93218e-18
GOTERM_BP_FAT	GO:0001775~cell activation	40	1.01138	3.02586e-21	ITGAL, TNF, CD8A, TLR1, ITGB2, SKAP2, CD74, ITGAM, TGFB1, CD48, DOCK2, ITGAX, ZAP70, FCER1G, FAS, LTB, CD27, SPN, FYB, PTPRC, H2-M3, IKZF1, CD3D, PLEK, CD3E, IL7, SLA2, MYO1F, WAS, VAV1, LAT, P2RX7, LAT2, FYN, LCK, IRF1, CD79A, H2-DMA, LCP1, LCP2	328	246	13588	6.73607	5.86715e-18	1.46679e-18	5.18361e-18
GOTERM_BP_FAT	GO:0045321~leukocyte activation	37	0.935525	3.21425e-20	ITGAL, CD8A, TLR1, ITGB2, SKAP2, CD74, ITGAM, TGFB1, CD48, DOCK2, ITGAX, ZAP70, FCER1G, FAS, CD27, SPN, FYB, PTPRC, H2-M3, IKZF1, CD3D, CD3E, IL7, SLA2, MYO1F, WAS, VAV1, LAT, P2RX7, LAT2, FYN, LCK, IRF1, CD79A, H2-DMA, LCP1, LCP2	328	219	13588	6.99905	6.23244e-17	1.24649e-17	5.50634e-17
GOTERM_BP_FAT	GO:0042110~T cell activation	27	0.68268	2.2705e-18	ITGAL, CD8A, ITGB2, TGFB1, ITGAM, CD74, CD48, DOCK2, ITGAX, ZAP70, FAS, SPN, PTPRC, H2-M3, CD3D, IKZF1, CD3E, IL7, SLA2, VAV1, WAS, P2RX7, FYN, LCK, IRF1, H2-DMA, LCP1	328	116	13588	9.64245	4.4025e-15	7.3375e-16	3.8896e-15
GOTERM_BP_FAT	GO:0050865~regulation of cell activation	30	0.758534	5.42164e-18	ITGAL, IL27RA, IL18, TBX21, TGFB1, CD74, CASP3, ZAP70, FCER1G, IL2RG, INPP5D, FAS, LAG3, CD27, SPN, PTPRC, PLEK, IKZF1, CD3E, IL7, TNFRSF14, THY1, CD38, LAT, CORO1A, TNFSF13B, CD274, LCK, H2-AA, H2-DMA	328	156	13588	7.9667	1.05126e-14	1.50179e-15	9.28782e-15
GOTERM_BP_FAT	GO:0002694~regulation of leukocyte activation	29	0.733249	3.79449e-17	ITGAL, IL27RA, IL18, TBX21, TGFB1, CD74, CASP3, ZAP70, FCER1G, IL2RG, INPP5D, FAS, LAG3, SPN, CD27, PTPRC, IKZF1, CD3E, IL7, TNFRSF14, THY1, CD38, LAT, CORO1A, TNFSF13B, CD274, LCK, H2-AA, H2-DMA	328	154	13588	7.80116	7.35751e-14	9.19688e-15	6.50034e-14
GOTERM_BP_FAT	GO:0051249~regulation of lymphocyte activation	28	0.707965	6.25771e-17	ITGAL, IL27RA, IL18, TBX21, TGFB1, CD74, CASP3, ZAP70, IL2RG, INPP5D, FAS, LAG3, SPN, CD27, PTPRC, IKZF1, CD3E, IL7, TNFRSF14, THY1, CD38, LAT, CORO1A, TNFSF13B, CD274, LCK, H2-AA, H2-DMA	328	144	13588	8.05522	2.15272e-13	2.38698e-14	1.88738e-13
GOTERM_BP_FAT	GO:0046649~lymphocyte activation	31	0.783818	1.83949e-16	ITGAL, CD8A, ITGB2, SKAP2, ITGAM, TGFB1, CD74, CD48, DOCK2, ITGAX, ZAP70, FAS, CD27, SPN, PTPRC, H2-M3, CD3D, IKZF1, CD3E, IL7, SLA2, WAS, VAV1, P2RX7, LAT2, FYN, LCK, IRF1, CD79A, H2-DMA, LCP1	328	191	13588	6.72373	4.30544e-13	4.30767e-14	3.77476e-13
GOTERM_BP_FAT	GO:0050778~positive regulation of immune response	26	0.657396	1.59732e-15	IL27RA, C3, CD247, UNC93B1, TLR2, TAP2, ZAP70, FCER1G, C2, CFI, LAG3, PTPRC, H2-M3, LYN, CD3E, H2-Q1, H2-Q8, THY1, C1QB, P2RX7, LAT2, TNFSF13B, LCK, H2-AA, CD79B, CD79A, H2-DMA	328	136	13588	7.91984	3.01381e-12	2.74003e-13	2.66454e-12
GOTERM_BP_FAT	GO:0050867~positive regulation of cell activation	23	0.581542	1.98923e-15	PTPRC, ITGAL, PLEK, IKZF1, IL7, CD3E, TBX21, IL18, CD74, TGFB1, THY1, CD38, CORO1A, TNFSF13B, LCK, ZAP70, FCER1G, H2-AA, IL2RG, INPP5D, H2-DMA, CD27, SPN	328	101	13588	9.43383	3.8749e-12	3.22853e-13	3.41949e-12
GOTERM_BP_FAT	GO:0006954~inflammatory response	32	0.809102	2.77873e-15	CCL3, TNF, C3, TLR1, TLR2, TAC1, ITGB2, CCL5, CCL4, TGFB1, CXCL10, TNFRSF1B, CCL20, CD44, SAA2, SAA1, ITGB6, CFI, NOS2, REG3G, C2, FN1, NFKBIZ, NCF1, SAA3, CHST4, C1QB, LAT, P2RX7, PLA2G7, CD14, F2R	328	225	13588	5.89182	5.38181e-12	4.14002e-13	4.75175e-12
GOTERM_BP_FAT	GO:0048584~positive regulation of response to stimulus	29	0.733249	6.63766e-15	TNF, IL27RA, C3, CD247, UNC93B1, TLR2, TAP2, ZAP70, TGM2, FCER1G, CFI, C2, LAG3, CD27, PTPRC, H2-M3, LYN, CD3E, H2-Q1, H2-Q8, THY1, C1QB, P2RX7, LAT2, TNFSF13B, LCK, H2-AA, CD79B, CD79A, H2-DMA	328	186	13588	6.45902	1.29163e-11	9.22595e-13	1.14131e-11
GOTERM_BP_FAT	GO:0050863~regulation of T cell activation	23	0.581542	9.08137e-15	PTPRC, ITGAL, IKZF1, IL7, CD3E, IL18, TNFRSF14, TGFB1, CD74, THY1, LAT, CORO1A, CASP3, TNFSF13B, CD274, LCK, ZAP70, H2-AA, IL2RG, H2-DMA, LAG3, CD27, SPN	328	108	13588	8.82238	1.76523e-11	1.17684e-12	1.55986e-11
GOTERM_BP_FAT	GO:0002696~positive regulation of leukocyte activation	22	0.556258	1.59091e-14	ITGAL, PTPRC, IKZF1, IL7, CD3E, TBX21, IL18, TGFB1, CD74, THY1, CD38, CORO1A, TNFSF13B, LCK, ZAP70, FCER1G, H2-AA, IL2RG, INPP5D, H2-DMA, CD27, SPN	328	99	13588	9.20596	3.07839e-11	1.92402e-12	2.72005e-11
GOTERM_BP_FAT	GO:0051251~positive regulation of lymphocyte activation	21	0.530973	6.40443e-14	ITGAL, PTPRC, IKZF1, IL7, CD3E, TBX21, IL18, TGFB1, CD74, THY1, CD38, CORO1A, TNFSF13B, LCK, ZAP70, H2-AA, IL2RG, INPP5D, H2-DMA, CD27, SPN	328	94	13588	9.25493	1.24212e-10	7.3066e-12	1.09746e-10
GOTERM_BP_FAT	GO:0009611~response to wounding	37	0.935525	1.17424e-13	CCL3, TNF, C3, TLR1, TLR2, TAC1, ITGB2, CCL5, CCL4, TGFB1, CXCL10, CASP3, TNFRSF1B, CCL20, CD44, SAA2, SAA1, ITGB6, CFI, NOS2, REG3G, C2, FN1, NFKBIZ, KLK8, PLEK, GATM, NCF1, SAA3, CHST4, C1QB, LAT, P2RX7, PLA2G7, CD14, LCP1, F2R	328	347	13588	4.41727	2.27758e-10	1.26532e-11	2.01228e-10
GOTERM_BP_FAT	GO:0019882~antigen processing and presentation	20	0.505689	1.66176e-13	ICAM1, H2-M3, H2-Q1, UNC93B1, H2-DMB1, H2-AB1, H2-DMB2, PSMB8, H2-Q8, CD74, PSMB9, PSME2, TAP2, H2-EB1, FCER1G, H2-AA, H2-T23, H2-T10, H2-T24, H2-DMA, TAPBPL	328	87	13588	9.52341	3.22263e-10	1.69612e-11	2.84717e-10
GOTERM_BP_FAT	GO:0048002~antigen processing and presentation of peptide antigen	14	0.353982	6.56933e-13	H2-M3, H2-Q1, UNC93B1, H2-DMB1, H2-AB1, H2-DMB2, H2-Q8, CD74, TAP2, H2-EB1, FCER1G, H2-AA, H2-T23, H2-DMA, TAPBPL	328	35	13588	16.5707	1.27377e-09	6.36883e-11	1.12537e-09
GOTERM_BP_FAT	GO:0050870~positive regulation of T cell activation	17	0.429836	2.52934e-12	ITGAL, PTPRC, IKZF1, IL7, CD3E, IL18, CD74, THY1, CORO1A, TNFSF13B, LCK, ZAP70, H2-AA, IL2RG, H2-DMA, CD27, SPN	328	66	13588	10.6705	4.90433e-09	2.3354e-10	4.33297e-09
GOTERM_BP_FAT	GO:0001817~regulation of cytokine production	22	0.556258	1.65287e-11	ZCCHC11, TNF, H2-M3, IL27RA, CD3E, IL18, H2-Q1, TLR1, TLR2, H2-Q8, P2RX7, SH2D1B1, GATA4, IRF1, FCER1G, INPP5D, LTB, LAG3, CD14, CD27, SPN, SRGN, F2R	328	139	13588	6.55676	3.20491e-08	1.45678e-09	2.83153e-08
GOTERM_BP_FAT	GO:0019884~antigen processing and presentation of exogenous antigen	12	0.303413	1.97714e-11	H2-M3, PSME2, TAP2, H2-EB1, UNC93B1, H2-AA, FCER1G, H2-DMB1, H2-AB1, H2-DMA, CD74, H2-DMB2	328	28	13588	17.7544	3.83368e-08	1.66682e-09	3.38704e-08
GOTERM_BP_FAT	GO:0002252~immune effector process	21	0.530973	2.00628e-11	ICAM1, PTPRC, CD8A, C3, NCF1, H2-Q1, MYO1F, SAMHD1, H2-Q8, CD74, C1QB, LAT, LAT2, TNFSF13B, FCER1G, H2-AA, CFI, C2, FAS, INPP5D, H2-DMA, CD27	328	126	13588	6.90447	3.89018e-08	1.62091e-09	3.43697e-08
GOTERM_BP_FAT	GO:0002478~antigen processing and presentation of exogenous peptide antigen	11	0.278129	4.92523e-11	H2-M3, TAP2, H2-EB1, UNC93B1, H2-AA, FCER1G, H2-DMB1, H2-AB1, H2-DMA, CD74, H2-DMB2	328	23	13588	19.8128	9.55001e-08	3.82001e-09	8.43742e-08
GOTERM_BP_FAT	GO:0002253~activation of immune response	17	0.429836	1.84876e-10	PTPRC, LYN, CD3E, C3, CD247, UNC93B1, TLR2, THY1, C1QB, LAT2, LCK, ZAP70, FCER1G, CD79B, CFI, CD79A, C2	328	86	13588	8.18902	3.58475e-07	1.37875e-08	3.16712e-07
GOTERM_BP_FAT	GO:0002764~immune response-regulating signal transduction	14	0.353982	1.95443e-10	PTPRC, LYN, CD3E, CD247, UNC93B1, TLR2, THY1, LAT2, SH2D1B1, LCK, ZAP70, FCER1G, CD79B, CD79A	328	52	13588	11.1534	3.78963e-07	1.40357e-08	3.34813e-07
GOTERM_BP_FAT	GO:0030217~T cell differentiation	16	0.404551	2.87961e-10	PTPRC, CD8A, CD3D, IKZF1, IL7, CD3E, VAV1, CD74, TGFB1, DOCK2, LCK, ZAP70, IRF1, FAS, H2-DMA, SPN	328	76	13588	8.72144	5.58357e-07	1.99413e-08	4.93307e-07
GOTERM_BP_FAT	GO:0002768~immune response-regulating cell surface receptor signaling pathway	13	0.328698	3.26309e-10	PTPRC, LYN, CD3E, CD247, TLR2, THY1, LAT2, SH2D1B1, LCK, ZAP70, FCER1G, CD79B, CD79A	328	44	13588	12.2397	6.32714e-07	2.18177e-08	5.59001e-07
GOTERM_BP_FAT	GO:0045061~thymic T cell selection	9	0.22756	5.74111e-10	PTPRC, DOCK2, CD3D, CD3E, ZAP70, FAS, H2-DMA, CD74, SPN	328	15	13588	24.8561	1.1132e-06	3.71067e-08	9.83511e-07
GOTERM_BP_FAT	GO:0002757~immune response-activating signal transduction	13	0.328698	9.88671e-10	PTPRC, LYN, CD3E, CD247, UNC93B1, TLR2, THY1, LAT2, LCK, ZAP70, FCER1G, CD79B, CD79A	328	48	13588	11.2198	1.91703e-06	6.18398e-08	1.69369e-06
GOTERM_BP_FAT	GO:0019886~antigen processing and presentation of exogenous peptide antigen via MHC class II	9	0.22756	1.12428e-09	H2-EB1, UNC93B1, H2-AA, FCER1G, H2-DMB1, H2-AB1, H2-DMA, CD74, H2-DMB2	328	16	13588	23.3026	2.17998e-06	6.81244e-08	1.92601e-06
GOTERM_BP_FAT	GO:0002495~antigen processing and presentation of peptide antigen via MHC class II	9	0.22756	1.12428e-09	H2-EB1, UNC93B1, H2-AA, FCER1G, H2-DMB1, H2-AB1, H2-DMA, CD74, H2-DMB2	328	16	13588	23.3026	2.17998e-06	6.81244e-08	1.92601e-06
GOTERM_BP_FAT	GO:0002429~immune response-activating cell surface receptor signaling pathway	12	0.303413	2.19904e-09	PTPRC, LAT2, LYN, CD3E, CD247, LCK, ZAP70, TLR2, FCER1G, CD79B, CD79A, THY1	328	41	13588	12.1249	4.26392e-06	1.2921e-07	3.76717e-06
GOTERM_BP_FAT	GO:0002443~leukocyte mediated immunity	16	0.404551	2.91586e-09	ICAM1, CD8A, NCF1, C3, MYO1F, CD74, C1QB, LAT, LAT2, FCER1G, H2-AA, INPP5D, FAS, C2, CFI, H2-DMA	328	89	13588	7.44752	5.65383e-06	1.6629e-07	4.99516e-06
GOTERM_BP_FAT	GO:0012502~induction of programmed cell death	21	0.530973	3.44967e-09	TNF, CD3E, IL18, GZMB, DAPK2, GCH1, CASP3, CASP4, LCK, CASP12, RIPK3, TGM2, TRP53INP1, FASL, EAF2, FAS, APAF1, LTB, RUNX3, CD27, SPN	328	167	13588	5.20936	6.68888e-06	1.91111e-07	5.90963e-06
GOTERM_BP_FAT	GO:0006917~induction of apoptosis	21	0.530973	3.44967e-09	TNF, CD3E, IL18, GZMB, DAPK2, GCH1, CASP3, CASP4, LCK, CASP12, RIPK3, TGM2, TRP53INP1, FASL, EAF2, FAS, APAF1, LTB, RUNX3, CD27, SPN	328	167	13588	5.20936	6.68888e-06	1.91111e-07	5.90963e-06
GOTERM_BP_FAT	GO:0045621~positive regulation of lymphocyte differentiation	11	0.278129	4.46075e-09	PTPRC, IKZF1, IL7, LCK, ZAP70, H2-AA, IL2RG, INPP5D, H2-DMA, CD74, CD27	328	34	13588	13.4028	8.64936e-06	2.40261e-07	7.64172e-06
GOTERM_BP_FAT	GO:0042981~regulation of apoptosis	39	0.986094	5.27794e-09	TRAF1, TNF, IL18, CLU, HSPA1A, PPT1, CD74, TGFB1, GCH1, CASP3, CASP4, TGM2, TRP53INP1, FCER1G, FASL, FAS, INPP5D, SKIL, LTB, CD27, SPN, RUNX3, PIK3CG, PTPRC, IL2RB, CD3G, CD3E, IL7, GZMB, DAPK2, SERPINB9, P2RX7, TNFSF13B, CASP12, LCK, RIPK3, EAF2, APAF1, F2R	328	553	13588	2.9216	1.02339e-05	2.76593e-07	9.04165e-06
GOTERM_BP_FAT	GO:0032944~regulation of mononuclear cell proliferation	15	0.379267	5.96202e-09	ITGAL, PTPRC, IL7, CD3E, IL18, TNFRSF14, TGFB1, CD38, CORO1A, CASP3, TNFSF13B, CD274, ZAP70, INPP5D, SPN	328	80	13588	7.76753	1.15603e-05	3.0422e-07	1.02136e-05
GOTERM_BP_FAT	GO:0050670~regulation of lymphocyte proliferation	15	0.379267	5.96202e-09	ITGAL, PTPRC, IL7, CD3E, IL18, TNFRSF14, TGFB1, CD38, CORO1A, CASP3, TNFSF13B, CD274, ZAP70, INPP5D, SPN	328	80	13588	7.76753	1.15603e-05	3.0422e-07	1.02136e-05
GOTERM_BP_FAT	GO:0002504~antigen processing and presentation of peptide or polysaccharide antigen via MHC class II	9	0.22756	6.19831e-09	H2-EB1, UNC93B1, H2-AA, FCER1G, H2-DMB1, H2-AB1, H2-DMA, CD74, H2-DMB2	328	19	13588	19.6232	1.20184e-05	3.08167e-07	1.06183e-05
GOTERM_BP_FAT	GO:0043065~positive regulation of apoptosis	25	0.632111	7.0174e-09	TNF, IL18, TGFB1, GCH1, CASP3, CASP4, TGM2, TRP53INP1, FASL, INPP5D, FAS, LTB, RUNX3, SPN, CD27, PTPRC, CD3E, GZMB, DAPK2, P2RX7, CASP12, LCK, RIPK3, APAF1, EAF2	328	248	13588	4.17609	1.36066e-05	3.40168e-07	1.20215e-05
GOTERM_BP_FAT	GO:0009617~response to bacterium	20	0.505689	7.1994e-09	TNF, FGR, IL27RA, H2-M3, NCF1, TLR1, TLR2, MYO1F, STAT1, GPX2, IL12RB2, P2RX7, TAP2, PGLYRP2, IRF8, FCER1G, NOS2, CD14, SPN, F2R	328	157	13588	5.2773	1.39595e-05	3.40479e-07	1.23333e-05
GOTERM_BP_FAT	GO:0043067~regulation of programmed cell death	39	0.986094	7.38493e-09	TRAF1, TNF, IL18, CLU, HSPA1A, PPT1, CD74, TGFB1, GCH1, CASP3, CASP4, TGM2, TRP53INP1, FCER1G, FASL, FAS, INPP5D, SKIL, LTB, CD27, SPN, RUNX3, PIK3CG, PTPRC, IL2RB, CD3G, CD3E, IL7, GZMB, DAPK2, SERPINB9, P2RX7, TNFSF13B, CASP12, LCK, RIPK3, EAF2, APAF1, F2R	328	560	13588	2.88508	1.43193e-05	3.40938e-07	1.26511e-05
GOTERM_BP_FAT	GO:0043068~positive regulation of programmed cell death	25	0.632111	8.19107e-09	TNF, IL18, TGFB1, GCH1, CASP3, CASP4, TGM2, TRP53INP1, FASL, INPP5D, FAS, LTB, RUNX3, SPN, CD27, PTPRC, CD3E, GZMB, DAPK2, P2RX7, CASP12, LCK, RIPK3, APAF1, EAF2	328	250	13588	4.14268	1.58824e-05	3.6936e-07	1.40321e-05
GOTERM_BP_FAT	GO:0070663~regulation of leukocyte proliferation	15	0.379267	8.32263e-09	ITGAL, PTPRC, IL7, CD3E, IL18, TNFRSF14, TGFB1, CD38, CORO1A, CASP3, TNFSF13B, CD274, ZAP70, INPP5D, SPN	328	82	13588	7.57808	1.61374e-05	3.66763e-07	1.42575e-05
GOTERM_BP_FAT	GO:0002521~leukocyte differentiation	19	0.480405	8.60614e-09	PTPRC, TNF, CD8A, CD3D, IKZF1, IL7, CD3E, VAV1, TGFB1, CD74, DOCK2, LCK, ZAP70, IRF1, SPIB, FAS, CD79A, H2-DMA, SPN	328	142	13588	5.54303	1.66872e-05	3.70829e-07	1.47432e-05
GOTERM_BP_FAT	GO:0010941~regulation of cell death	39	0.986094	8.60779e-09	TRAF1, TNF, IL18, CLU, HSPA1A, PPT1, CD74, TGFB1, GCH1, CASP3, CASP4, TGM2, TRP53INP1, FCER1G, FASL, FAS, INPP5D, SKIL, LTB, CD27, SPN, RUNX3, PIK3CG, PTPRC, IL2RB, CD3G, CD3E, IL7, GZMB, DAPK2, SERPINB9, P2RX7, TNFSF13B, CASP12, LCK, RIPK3, EAF2, APAF1, F2R	328	563	13588	2.86971	1.66904e-05	3.62837e-07	1.4746e-05
GOTERM_BP_FAT	GO:0010942~positive regulation of cell death	25	0.632111	9.5862e-09	TNF, IL18, TGFB1, GCH1, CASP3, CASP4, TGM2, TRP53INP1, FASL, INPP5D, FAS, LTB, RUNX3, SPN, CD27, PTPRC, CD3E, GZMB, DAPK2, P2RX7, CASP12, LCK, RIPK3, APAF1, EAF2	328	252	13588	4.1098	1.85875e-05	3.95482e-07	1.64221e-05
GOTERM_BP_FAT	GO:0030098~lymphocyte differentiation	17	0.429836	1.34054e-08	PTPRC, CD8A, CD3D, IKZF1, IL7, CD3E, VAV1, TGFB1, CD74, DOCK2, LCK, ZAP70, IRF1, FAS, CD79A, H2-DMA, SPN	328	114	13588	6.17769	2.59927e-05	5.41522e-07	2.29648e-05
GOTERM_BP_FAT	GO:0045060~negative thymic T cell selection	7	0.176991	1.46698e-08	PTPRC, DOCK2, CD3E, ZAP70, FAS, CD74, SPN	328	9	13588	32.2209	2.84443e-05	5.80503e-07	2.51308e-05
GOTERM_BP_FAT	GO:0045058~T cell selection	9	0.22756	1.59998e-08	PTPRC, DOCK2, CD3D, CD3E, ZAP70, FAS, H2-DMA, CD74, SPN	328	21	13588	17.7544	3.1023e-05	6.2047e-07	2.74092e-05
GOTERM_BP_FAT	GO:0002697~regulation of immune effector process	15	0.379267	2.13752e-08	PTPRC, TNF, IL27RA, H2-M3, C3, TBX21, H2-Q1, H2-Q8, TGFB1, CD37, P2RX7, SH2D1B1, TAP2, FCER1G, LAG3, SPN	328	88	13588	7.06139	4.14457e-05	8.12677e-07	3.66179e-05
GOTERM_BP_FAT	GO:0002683~negative regulation of immune system process	14	0.353982	2.79537e-08	PTPRC, IL27RA, TNFRSF14, CD74, TGFB1, THY1, GPX2, CASP3, SH2D1B1, CD274, INPP5D, FAS, SPN, LAG3	328	76	13588	7.63126	5.42007e-05	1.04235e-06	4.78875e-05
GOTERM_BP_FAT	GO:0008283~cell proliferation	24	0.606827	3.00268e-08	PTPRC, ITGAL, KLK8, TNF, NCF1, ITGB2, TGFB1, CD74, ITGAM, ASAH2, SH2D2A, STAT4, CCND1, DOCK2, TNFRSF1B, P2RX7, ITGAX, FYN, GNG2, CD79A, AREG, CD27, THPO, DMBT1	328	247	13588	4.02528	5.82203e-05	1.09853e-06	5.1439e-05
GOTERM_BP_FAT	GO:0016265~death	36	0.91024	3.55205e-08	TRAF1, TNF, CLU, PPT1, TGFB1, ASAH2, CASP3, TNFRSF1B, TMEM173, CASP4, TRP53INP1, ZC3H12A, FASL, FAS, INPP5D, LTB, CD27, SRGN, KLK8, NCF1, GZMA, TNFRSF14, GZMB, DAPK2, LSP1, DNASE1, TNFSF10, P2RX7, RASSF5, CASP12, LCK, RIPK3, CYFIP2, SH3KBP1, APAF1, F2R	328	519	13588	2.87354	6.88718e-05	1.27545e-06	6.08501e-05
GOTERM_BP_FAT	GO:0043383~negative T cell selection	7	0.176991	3.59323e-08	PTPRC, DOCK2, CD3E, ZAP70, FAS, CD74, SPN	328	10	13588	28.9988	6.96702e-05	1.26677e-06	6.15556e-05
GOTERM_BP_FAT	GO:0002706~regulation of lymphocyte mediated immunity	13	0.328698	3.96043e-08	PTPRC, IL27RA, H2-M3, C3, TBX21, H2-Q1, H2-Q8, TGFB1, P2RX7, SH2D1B1, TAP2, FCER1G, LAG3, SPN	328	65	13588	8.28537	7.67898e-05	1.3713e-06	6.78462e-05
GOTERM_BP_FAT	GO:0030097~hemopoiesis	24	0.606827	4.0515e-08	PTPRC, TNF, LYN, CD8A, CD3D, IKZF1, IL7, CD3E, HCLS1, VAV1, TGFB1, CD74, DOCK2, IRF8, LCK, IRF1, ZAP70, SPIB, FAS, CD79A, RUNX1, H2-DMA, SPN, THPO	328	251	13588	3.96113	7.85556e-05	1.37822e-06	6.94064e-05
GOTERM_BP_FAT	GO:0045582~positive regulation of T cell differentiation	10	0.252845	4.17784e-08	PTPRC, IKZF1, IL7, LCK, ZAP70, H2-AA, IL2RG, H2-DMA, CD74, CD27	328	32	13588	12.9459	8.10051e-05	1.3967e-06	7.15707e-05
GOTERM_BP_FAT	GO:0032943~mononuclear cell proliferation	11	0.278129	5.38082e-08	ITGAL, PTPRC, P2RX7, DOCK2, ITGAX, FYN, ITGB2, CD79A, CD27, TGFB1, ITGAM	328	43	13588	10.5976	0.000104329	1.76837e-06	9.21788e-05
GOTERM_BP_FAT	GO:0070661~leukocyte proliferation	11	0.278129	5.38082e-08	ITGAL, PTPRC, P2RX7, DOCK2, ITGAX, FYN, ITGB2, CD79A, CD27, TGFB1, ITGAM	328	43	13588	10.5976	0.000104329	1.76837e-06	9.21788e-05
GOTERM_BP_FAT	GO:0008219~cell death	35	0.884956	6.42373e-08	TRAF1, TNF, CLU, PPT1, TGFB1, ASAH2, CASP3, TNFRSF1B, TMEM173, CASP4, TRP53INP1, ZC3H12A, FASL, FAS, INPP5D, LTB, CD27, SRGN, KLK8, NCF1, GZMA, TNFRSF14, GZMB, DAPK2, LSP1, DNASE1, TNFSF10, P2RX7, RASSF5, CASP12, LCK, RIPK3, CYFIP2, SH3KBP1, APAF1	328	507	13588	2.85984	0.000124548	2.07593e-06	0.000110045
GOTERM_BP_FAT	GO:0002822~regulation of adaptive immune response based on somatic recombination of immune receptors built from immunoglobulin superfamily domains	12	0.303413	7.50798e-08	PTPRC, IL27RA, H2-M3, C3, TBX21, H2-Q1, TGFB1, H2-Q8, P2RX7, TNFSF13B, TAP2, FCER1G, SPN	328	56	13588	8.87718	0.000145569	2.38655e-06	0.000128619
GOTERM_BP_FAT	GO:0002819~regulation of adaptive immune response	12	0.303413	7.50798e-08	PTPRC, IL27RA, H2-M3, C3, TBX21, H2-Q1, TGFB1, H2-Q8, P2RX7, TNFSF13B, TAP2, FCER1G, SPN	328	56	13588	8.87718	0.000145569	2.38655e-06	0.000128619
GOTERM_BP_FAT	GO:0048534~hemopoietic or lymphoid organ development	25	0.632111	7.83596e-08	TNF, CD8A, TGFB1, CD74, DOCK2, ZAP70, SPIB, FAS, RUNX1, LTB, SPN, THPO, PTPRC, CD3D, IKZF1, LYN, CD3E, IL7, HCLS1, VAV1, LCK, IRF8, IRF1, CD79A, H2-DMA	328	281	13588	3.68566	0.000151928	2.45063e-06	0.000134238
GOTERM_BP_FAT	GO:0002703~regulation of leukocyte mediated immunity	13	0.328698	9.39177e-08	PTPRC, IL27RA, H2-M3, C3, TBX21, H2-Q1, H2-Q8, TGFB1, P2RX7, SH2D1B1, TAP2, FCER1G, LAG3, SPN	328	70	13588	7.69355	0.00018209	2.89057e-06	0.00016089
GOTERM_BP_FAT	GO:0045619~regulation of lymphocyte differentiation	12	0.303413	1.09982e-07	PTPRC, IKZF1, IL7, LCK, ZAP70, H2-AA, IL2RG, FAS, INPP5D, H2-DMA, CD74, CD27	328	58	13588	8.57107	0.000213232	3.3321e-06	0.00018841
GOTERM_BP_FAT	GO:0050851~antigen receptor-mediated signaling pathway	10	0.252845	1.28816e-07	PTPRC, LAT2, LYN, CD3E, CD247, LCK, ZAP70, CD79B, CD79A, THY1	328	36	13588	11.5075	0.000249742	3.84266e-06	0.000220674
GOTERM_BP_FAT	GO:0042129~regulation of T cell proliferation	12	0.303413	1.32315e-07	ITGAL, PTPRC, CASP3, CORO1A, TNFSF13B, CD3E, IL18, CD274, ZAP70, TNFRSF14, TGFB1, SPN	328	59	13588	8.4258	0.000256526	3.88724e-06	0.000226669
GOTERM_BP_FAT	GO:0002520~immune system development	25	0.632111	1.94815e-07	TNF, CD8A, TGFB1, CD74, DOCK2, ZAP70, SPIB, FAS, RUNX1, LTB, SPN, THPO, PTPRC, CD3D, IKZF1, LYN, CD3E, IL7, HCLS1, VAV1, LCK, IRF8, IRF1, CD79A, H2-DMA	328	295	13588	3.51075	0.000377675	5.63799e-06	0.000333738
GOTERM_BP_FAT	GO:0001819~positive regulation of cytokine production	12	0.303413	2.25311e-07	ZCCHC11, TNF, IL27RA, H2-M3, CD3E, IL18, H2-Q1, TLR2, H2-Q8, P2RX7, GATA4, FCER1G, CD14	328	62	13588	8.0181	0.000436782	6.42465e-06	0.00038598
GOTERM_BP_FAT	GO:0051094~positive regulation of developmental process	21	0.530973	2.30256e-07	PTPRC, TNF, IKZF1, IL7, SOCS3, CLU, ITGB2, CD74, P2RX7, ETS1, GATA4, LCK, ZAP70, H2-AA, IL2RG, INPP5D, SEMA4D, RUNX1, H2-DMA, CD27, DMBT1	328	214	13588	4.06525	0.000446368	6.47052e-06	0.000394452
GOTERM_BP_FAT	GO:0045059~positive thymic T cell selection	6	0.151707	4.13184e-07	PTPRC, DOCK2, CD3D, ZAP70, H2-DMA, CD74	328	8	13588	31.0701	0.000800843	1.14451e-05	0.000707824
GOTERM_BP_FAT	GO:0007159~leukocyte adhesion	7	0.176991	4.73523e-07	ICAM1, ITGAL, PTPRC, ITGB2, ITGA4, SELPLG, ITGAM	328	14	13588	20.7134	0.00091774	1.29318e-05	0.00081119
GOTERM_BP_FAT	GO:0046651~lymphocyte proliferation	10	0.252845	5.37241e-07	ITGAL, PTPRC, P2RX7, DOCK2, ITGAX, FYN, ITGB2, CD79A, CD27, ITGAM	328	42	13588	9.86353	0.00104117	1.44681e-05	0.000920344
GOTERM_BP_FAT	GO:0050864~regulation of B cell activation	11	0.278129	6.35331e-07	CD38, PTPRC, CASP3, TNFSF13B, IL27RA, IL7, TBX21, IL2RG, FAS, INPP5D, TGFB1	328	55	13588	8.28537	0.00123115	1.68753e-05	0.00108838
GOTERM_BP_FAT	GO:0033077~T cell differentiation in the thymus	9	0.22756	6.56286e-07	PTPRC, DOCK2, CD3D, CD3E, ZAP70, FAS, H2-DMA, CD74, SPN	328	32	13588	11.6513	0.00127173	1.71963e-05	0.00112428
GOTERM_BP_FAT	GO:0002460~adaptive immune response based on somatic recombination of immune receptors built from immunoglobulin superfamily domains	13	0.328698	7.37753e-07	ICAM1, CD8A, C3, IL18, CD74, C1QB, H2-AA, FCER1G, INPP5D, FAS, C2, CFI, H2-DMA	328	84	13588	6.4113	0.00142948	1.90732e-05	0.00126384
GOTERM_BP_FAT	GO:0002250~adaptive immune response	13	0.328698	7.37753e-07	ICAM1, CD8A, C3, IL18, CD74, C1QB, H2-AA, FCER1G, INPP5D, FAS, C2, CFI, H2-DMA	328	84	13588	6.4113	0.00142948	1.90732e-05	0.00126384
GOTERM_BP_FAT	GO:0002824~positive regulation of adaptive immune response based on somatic recombination of immune receptors built from immunoglobulin superfamily domains	9	0.22756	1.08628e-06	PTPRC, P2RX7, TNFSF13B, H2-M3, IL27RA, C3, TAP2, H2-Q1, FCER1G, H2-Q8	328	34	13588	10.9659	0.00210407	2.7714e-05	0.00186089
GOTERM_BP_FAT	GO:0002821~positive regulation of adaptive immune response	9	0.22756	1.08628e-06	PTPRC, P2RX7, TNFSF13B, H2-M3, IL27RA, C3, TAP2, H2-Q1, FCER1G, H2-Q8	328	34	13588	10.9659	0.00210407	2.7714e-05	0.00186089
GOTERM_BP_FAT	GO:0045597~positive regulation of cell differentiation	18	0.45512	1.09797e-06	PTPRC, IKZF1, IL7, SOCS3, CLU, CD74, ETS1, GATA4, LCK, ZAP70, H2-AA, IL2RG, SEMA4D, INPP5D, RUNX1, H2-DMA, CD27, DMBT1	328	175	13588	4.26105	0.0021267	2.76485e-05	0.00188092
GOTERM_BP_FAT	GO:0008624~induction of apoptosis by extracellular signals	8	0.202276	1.45126e-06	CASP3, TNF, CD3E, IL18, GZMB, FASL, FAS, SPN	328	25	13588	13.2566	0.00281004	3.60762e-05	0.00248613
GOTERM_BP_FAT	GO:0032844~regulation of homeostatic process	11	0.278129	1.47208e-06	PTPRC, KLK8, P2RX7, LMO2, ETS1, LCK, FCER1G, INPP5D, TGFB1, F2R, THY1	328	60	13588	7.59492	0.00285029	3.61305e-05	0.00252179
GOTERM_BP_FAT	GO:0045580~regulation of T cell differentiation	10	0.252845	1.77959e-06	PTPRC, IKZF1, IL7, LCK, ZAP70, H2-AA, IL2RG, H2-DMA, CD74, CD27	328	48	13588	8.63059	0.00344468	4.31319e-05	0.00304857
GOTERM_BP_FAT	GO:0043368~positive T cell selection	6	0.151707	1.78672e-06	PTPRC, DOCK2, CD3D, ZAP70, H2-DMA, CD74	328	10	13588	24.8561	0.00345846	4.27701e-05	0.00306079
GOTERM_BP_FAT	GO:0002449~lymphocyte mediated immunity	12	0.303413	1.88043e-06	C1QB, ICAM1, CD8A, C3, H2-AA, FCER1G, CFI, C2, FAS, INPP5D, H2-DMA, CD74	328	76	13588	6.54108	0.00363953	4.44644e-05	0.00322133
GOTERM_BP_FAT	GO:0006935~chemotaxis	14	0.353982	2.09731e-06	CCL3, ITGB2, CCL5, CCL4, ITGAM, CXCL10, CCR9, LSP1, CORO1A, DOCK2, CCL20, RAC2, FCER1G, CMTM7	328	109	13588	5.32088	0.00405844	4.89951e-05	0.00359285
GOTERM_BP_FAT	GO:0042330~taxis	14	0.353982	2.09731e-06	CCL3, ITGB2, CCL5, CCL4, ITGAM, CXCL10, CCR9, LSP1, CORO1A, DOCK2, CCL20, RAC2, FCER1G, CMTM7	328	109	13588	5.32088	0.00405844	4.89951e-05	0.00359285
GOTERM_BP_FAT	GO:0042127~regulation of cell proliferation	33	0.834387	2.25729e-06	ITGAL, TNF, FGF15, PTGS2, IL18, IFITM3, CLU, SKAP2, TGFB1, CXCL10, SLFN2, CASP3, RAC2, GATA4, ZAP70, TGM2, NOS2, INPP5D, LTB, RUNX3, SPN, PTPRC, LYN, CD3E, IL7, HCLS1, TNFRSF14, CD38, CORO1A, TNFSF13B, CD274, EAF2, F2R	328	538	13588	2.54105	0.00436732	5.21045e-05	0.0038669
GOTERM_BP_FAT	GO:0032946~positive regulation of mononuclear cell proliferation	10	0.252845	2.54837e-06	ITGAL, CD38, PTPRC, CORO1A, TNFSF13B, IL7, CD3E, IL18, ZAP70, SPN	328	50	13588	8.28537	0.0049291	5.81312e-05	0.00436552
GOTERM_BP_FAT	GO:0050671~positive regulation of lymphocyte proliferation	10	0.252845	2.54837e-06	ITGAL, CD38, PTPRC, CORO1A, TNFSF13B, IL7, CD3E, IL18, ZAP70, SPN	328	50	13588	8.28537	0.0049291	5.81312e-05	0.00436552
GOTERM_BP_FAT	GO:0006915~apoptosis	30	0.758534	2.73263e-06	TRAF1, TNF, PPT1, ASAH2, TMEM173, CASP3, CASP4, TRP53INP1, ZC3H12A, FASL, FAS, INPP5D, LTB, CD27, SRGN, GZMA, NCF1, TNFRSF14, GZMB, DAPK2, LSP1, DNASE1, RASSF5, TNFSF10, CASP12, LCK, RIPK3, SH3KBP1, CYFIP2, APAF1	328	465	13588	2.6727	0.00528456	6.16094e-05	0.00468117
GOTERM_BP_FAT	GO:0048585~negative regulation of response to stimulus	11	0.278129	3.14205e-06	GPX2, PTPRC, KLK8, TNFRSF1B, IL27RA, SH2D1B1, SOCS3, SOCS1, INPP5D, TGFB1, SPN	328	65	13588	7.01069	0.00607393	7.00257e-05	0.00538252
GOTERM_BP_FAT	GO:0042098~T cell proliferation	8	0.202276	3.35925e-06	ITGAL, PTPRC, P2RX7, DOCK2, ITGAX, FYN, ITGB2, ITGAM	328	28	13588	11.8362	0.00649242	7.40153e-05	0.00575458
GOTERM_BP_FAT	GO:0070665~positive regulation of leukocyte proliferation	10	0.252845	3.58711e-06	ITGAL, CD38, PTPRC, CORO1A, TNFSF13B, IL7, CD3E, IL18, ZAP70, SPN	328	52	13588	7.9667	0.00693129	7.81478e-05	0.00614491
GOTERM_BP_FAT	GO:0012501~programmed cell death	30	0.758534	3.83167e-06	TRAF1, TNF, PPT1, ASAH2, TMEM173, CASP3, CASP4, TRP53INP1, ZC3H12A, FASL, FAS, INPP5D, LTB, CD27, SRGN, GZMA, NCF1, TNFRSF14, GZMB, DAPK2, LSP1, DNASE1, RASSF5, TNFSF10, CASP12, LCK, RIPK3, SH3KBP1, CYFIP2, APAF1	328	473	13588	2.62749	0.00740208	8.25479e-05	0.00656383
GOTERM_BP_FAT	GO:0042742~defense response to bacterium	13	0.328698	1.0867e-05	TNF, FGR, IL27RA, H2-M3, NCF1, TLR2, MYO1F, P2RX7, PGLYRP2, IRF8, FCER1G, NOS2, SPN	328	108	13588	4.98656	0.0208507	0.000231524	0.0186146
GOTERM_BP_FAT	GO:0050798~activated T cell proliferation	5	0.126422	1.0885e-05	ITGAL, ITGAX, FYN, ITGB2, ITGAM	328	7	13588	29.5906	0.0208849	0.000229388	0.0186454
GOTERM_BP_FAT	GO:0002699~positive regulation of immune effector process	9	0.22756	1.21403e-05	PTPRC, P2RX7, CD37, H2-M3, C3, TAP2, H2-Q1, FCER1G, LAG3, H2-Q8	328	46	13588	8.10525	0.0232653	0.000253089	0.0207956
GOTERM_BP_FAT	GO:0050853~B cell receptor signaling pathway	6	0.151707	1.31092e-05	PTPRC, LAT2, LYN, LCK, CD79B, CD79A	328	14	13588	17.7544	0.0250986	0.000270378	0.0224551
GOTERM_BP_FAT	GO:0050830~defense response to Gram-positive bacterium	7	0.176991	1.32511e-05	P2RX7, IL27RA, FGR, NCF1, PGLYRP2, TLR2, MYO1F	328	23	13588	12.6082	0.0253667	0.000270426	0.022698
GOTERM_BP_FAT	GO:0007229~integrin-mediated signaling pathway	11	0.278129	1.32573e-05	ITGAL, LAT, ITGAX, ITGAE, ITGB7, ITGB6, ITGB2, ADAM19, ITGA4, VAV1, ITGAM	328	76	13588	5.99599	0.0253785	0.000267735	0.0227086
GOTERM_BP_FAT	GO:0002274~myeloid leukocyte activation	8	0.202276	1.6506e-05	FYB, LAT, LAT2, TLR1, MYO1F, FCER1G, TGFB1, LCP2	328	35	13588	9.46899	0.0314986	0.000329898	0.0282727
GOTERM_BP_FAT	GO:0042102~positive regulation of T cell proliferation	8	0.202276	1.6506e-05	ITGAL, PTPRC, CORO1A, TNFSF13B, CD3E, IL18, ZAP70, SPN	328	35	13588	9.46899	0.0314986	0.000329898	0.0282727
GOTERM_BP_FAT	GO:0002237~response to molecule of bacterial origin	9	0.22756	1.97062e-05	IL12RB2, P2RX7, H2-M3, TAP2, TLR1, TLR2, STAT1, CD14, F2R	328	49	13588	7.60901	0.0374899	0.000389829	0.0337534
GOTERM_BP_FAT	GO:0019724~B cell mediated immunity	10	0.252845	2.36838e-05	C1QB, C3, H2-AA, FCER1G, CFI, C2, FAS, INPP5D, H2-DMA, CD74	328	65	13588	6.37336	0.044885	0.000463766	0.0405651
GOTERM_BP_FAT	GO:0050871~positive regulation of B cell activation	8	0.202276	2.42483e-05	CD38, PTPRC, TNFSF13B, IL7, TBX21, IL2RG, INPP5D, TGFB1	328	37	13588	8.95715	0.0459298	0.00047007	0.0415317
GOTERM_BP_FAT	GO:0050777~negative regulation of immune response	7	0.176991	2.84341e-05	GPX2, PTPRC, IL27RA, SH2D1B1, INPP5D, TGFB1, SPN	328	26	13588	11.1534	0.0536422	0.000545737	0.0486994
GOTERM_BP_FAT	GO:0051250~negative regulation of lymphocyte activation	9	0.22756	3.08846e-05	CASP3, CD274, TNFRSF14, FAS, INPP5D, LAG3, CD74, TGFB1, SPN	328	52	13588	7.17003	0.0581283	0.000586948	0.0528954
GOTERM_BP_FAT	GO:0050866~negative regulation of cell activation	9	0.22756	3.56232e-05	CASP3, CD274, TNFRSF14, FAS, INPP5D, LAG3, CD74, TGFB1, SPN	328	53	13588	7.03474	0.0667429	0.000670402	0.0610086
GOTERM_BP_FAT	GO:0002695~negative regulation of leukocyte activation	9	0.22756	3.56232e-05	CASP3, CD274, TNFRSF14, FAS, INPP5D, LAG3, CD74, TGFB1, SPN	328	53	13588	7.03474	0.0667429	0.000670402	0.0610086
GOTERM_BP_FAT	GO:0001916~positive regulation of T cell mediated cytotoxicity	5	0.126422	3.77131e-05	PTPRC, P2RX7, H2-M3, TAP2, H2-Q1, H2-Q8	328	9	13588	23.0149	0.0705174	0.000702898	0.0645868
GOTERM_BP_FAT	GO:0051240~positive regulation of multicellular organismal process	15	0.379267	3.95726e-05	ZCCHC11, TNF, IKZF1, IL27RA, H2-M3, CD3E, IL18, H2-Q1, TLR2, H2-Q8, P2RX7, GATA4, FCER1G, LTB, CD14, F2R	328	163	13588	3.81228	0.0738628	0.000730522	0.0677703
GOTERM_BP_FAT	GO:0002705~positive regulation of leukocyte mediated immunity	8	0.202276	4.12732e-05	PTPRC, P2RX7, H2-M3, C3, TAP2, H2-Q1, FCER1G, LAG3, H2-Q8	328	40	13588	8.28537	0.0769117	0.000754718	0.0706816
GOTERM_BP_FAT	GO:0002708~positive regulation of lymphocyte mediated immunity	8	0.202276	4.12732e-05	PTPRC, P2RX7, H2-M3, C3, TAP2, H2-Q1, FCER1G, LAG3, H2-Q8	328	40	13588	8.28537	0.0769117	0.000754718	0.0706816
GOTERM_BP_FAT	GO:0002709~regulation of T cell mediated immunity	6	0.151707	5.18232e-05	PTPRC, P2RX7, H2-M3, TAP2, H2-Q1, H2-Q8, SPN	328	18	13588	13.8089	0.0956038	0.000938697	0.0887413
GOTERM_BP_FAT	GO:0045087~innate immune response	12	0.303413	5.24333e-05	C1QB, IL18R1, TMEM173, C3, TLR1, TLR2, SAMHD1, CFI, C2, MX2, TGFB1, DHX58	328	107	13588	4.646	0.0966732	0.000940954	0.0897857
GOTERM_BP_FAT	GO:0008284~positive regulation of cell proliferation	20	0.505689	5.88681e-05	ITGAL, PTPRC, TNF, FGF15, LYN, IL7, CD3E, HCLS1, IL18, CLU, TGFB1, CXCL10, CD38, CORO1A, TNFSF13B, RAC2, ZAP70, TGM2, SPN, F2R	328	284	13588	2.91738	0.107875	0.00104669	0.100799
GOTERM_BP_FAT	GO:0001910~regulation of leukocyte mediated cytotoxicity	7	0.176991	6.76152e-05	PTPRC, P2RX7, H2-M3, SH2D1B1, TAP2, H2-Q1, LAG3, H2-Q8	328	30	13588	9.66626	0.122879	0.0011912	0.115769
GOTERM_BP_FAT	GO:0002260~lymphocyte homeostasis	7	0.176991	6.76152e-05	P2RX7, CASP3, CORO1A, TNFSF13B, FAS, SKIL, TGFB1	328	30	13588	9.66626	0.122879	0.0011912	0.115769
GOTERM_BP_FAT	GO:0002700~regulation of production of molecular mediator of immune response	7	0.176991	6.76152e-05	PTPRC, CD37, TNF, IL27RA, TBX21, FCER1G, TGFB1	328	30	13588	9.66626	0.122879	0.0011912	0.115769
GOTERM_BP_FAT	GO:0031341~regulation of cell killing	7	0.176991	6.76152e-05	PTPRC, P2RX7, H2-M3, SH2D1B1, TAP2, H2-Q1, LAG3, H2-Q8	328	30	13588	9.66626	0.122879	0.0011912	0.115769
GOTERM_BP_FAT	GO:0048872~homeostasis of number of cells	12	0.303413	8.65648e-05	P2RX7, CASP3, CORO1A, TNFSF13B, LYN, IL7, HCLS1, FAS, SKIL, TGFB1, F2R, CD7	328	113	13588	4.39931	0.154525	0.00151108	0.148191
GOTERM_BP_FAT	GO:0001914~regulation of T cell mediated cytotoxicity	5	0.126422	9.50658e-05	PTPRC, P2RX7, H2-M3, TAP2, H2-Q1, H2-Q8	328	11	13588	18.8304	0.168348	0.00164455	0.162733
GOTERM_BP_FAT	GO:0032675~regulation of interleukin-6 production	7	0.176991	9.90916e-05	P2RX7, TNF, ZCCHC11, TLR1, TLR2, FCER1G, INPP5D	328	32	13588	9.06212	0.174815	0.00169898	0.169618
GOTERM_BP_FAT	GO:0032649~regulation of interferon-gamma production	7	0.176991	9.90916e-05	H2-M3, IL27RA, SH2D1B1, CD3E, IL18, H2-Q1, H2-Q8, CD27	328	32	13588	9.06212	0.174815	0.00169898	0.169618
GOTERM_BP_FAT	GO:0016064~immunoglobulin mediated immune response	9	0.22756	0.000126349	C1QB, C3, H2-AA, FCER1G, CFI, C2, INPP5D, H2-DMA, CD74	328	63	13588	5.91812	0.2173	0.00214686	0.216228
GOTERM_BP_FAT	GO:0031343~positive regulation of cell killing	6	0.151707	0.000184348	PTPRC, P2RX7, H2-M3, TAP2, H2-Q1, LAG3, H2-Q8	328	23	13588	10.807	0.300566	0.00310372	0.315338
GOTERM_BP_FAT	GO:0001912~positive regulation of leukocyte mediated cytotoxicity	6	0.151707	0.000184348	PTPRC, P2RX7, H2-M3, TAP2, H2-Q1, LAG3, H2-Q8	328	23	13588	10.807	0.300566	0.00310372	0.315338
GOTERM_BP_FAT	GO:0002711~positive regulation of T cell mediated immunity	5	0.126422	0.000198258	PTPRC, P2RX7, H2-M3, TAP2, H2-Q1, H2-Q8	328	13	13588	15.9334	0.319182	0.00330882	0.339093
GOTERM_BP_FAT	GO:0010033~response to organic substance	27	0.68268	0.000225397	SLC9A3, TLR1, TLR2, CCL5, TGFB1, CD48, IL12RB2, TAP2, SPRR2B, FAS, AKT3, ZCCHC11, GATM, H2-M3, LYN, HCLS1, CLIC1, STAT1, TAT, CCND1, P2RX7, CORO1A, FYN, CASP12, AREG, CD14, F2R	328	505	13588	2.2149	0.354089	0.00372888	0.385427
GOTERM_BP_FAT	GO:0018212~peptidyl-tyrosine modification	7	0.176991	0.000229747	IL12RB2, LYN, SH2D1B1, FYN, LCK, ZAP70, BTK	328	37	13588	7.83751	0.359516	0.00376857	0.392852
GOTERM_BP_FAT	GO:0018108~peptidyl-tyrosine phosphorylation	7	0.176991	0.000229747	IL12RB2, LYN, SH2D1B1, FYN, LCK, ZAP70, BTK	328	37	13588	7.83751	0.359516	0.00376857	0.392852
GOTERM_BP_FAT	GO:0045123~cellular extravasation	4	0.101138	0.000261709	TNF, ITGB2, SELPLG, ITGAM	328	6	13588	27.6179	0.398014	0.0042558	0.44739
GOTERM_BP_FAT	GO:0002637~regulation of immunoglobulin production	6	0.151707	0.0002798	PTPRC, CD37, TNF, IL27RA, TBX21, TGFB1	328	25	13588	9.94244	0.41877	0.00451153	0.478246
GOTERM_BP_FAT	GO:0001776~leukocyte homeostasis	7	0.176991	0.000309657	P2RX7, CASP3, CORO1A, TNFSF13B, FAS, SKIL, TGFB1	328	39	13588	7.43558	0.451473	0.00495067	0.529152
GOTERM_BP_FAT	GO:0045576~mast cell activation	5	0.126422	0.000364332	FYB, LAT, LAT2, FCER1G, LCP2	328	15	13588	13.8089	0.506666	0.0057748	0.622307
GOTERM_BP_FAT	GO:0019221~cytokine-mediated signaling pathway	8	0.202276	0.000369377	STAT4, IL2RB, TNF, ZCCHC11, CSF2RB2, SOCS1, CSF2RB, STAT1	328	56	13588	5.91812	0.51147	0.00580709	0.630899
GOTERM_BP_FAT	GO:0050868~negative regulation of T cell activation	7	0.176991	0.000468624	CASP3, CD274, TNFRSF14, LAG3, CD74, TGFB1, SPN	328	42	13588	6.90447	0.597022	0.00730284	0.799773
GOTERM_BP_FAT	GO:0032729~positive regulation of interferon-gamma production	5	0.126422	0.000611516	H2-M3, IL27RA, CD3E, IL18, H2-Q1, H2-Q8	328	17	13588	12.1844	0.694588	0.00944386	1.04244
GOTERM_BP_FAT	GO:0002889~regulation of immunoglobulin mediated immune response	6	0.151707	0.00068004	PTPRC, IL27RA, C3, TBX21, FCER1G, TGFB1	328	30	13588	8.28537	0.73261	0.010414	1.15861
GOTERM_BP_FAT	GO:0002712~regulation of B cell mediated immunity	6	0.151707	0.00068004	PTPRC, IL27RA, C3, TBX21, FCER1G, TGFB1	328	30	13588	8.28537	0.73261	0.010414	1.15861
GOTERM_BP_FAT	GO:0002526~acute inflammatory response	9	0.22756	0.000721827	C1QB, SAA2, C3, SAA1, SAA3, CFI, C2, REG3G, FN1	328	81	13588	4.60298	0.753435	0.0109641	1.22939
GOTERM_BP_FAT	GO:0050848~regulation of calcium-mediated signaling	5	0.126422	0.000771428	ITGAL, CD8A, CD3E, SLA2, ZAP70	328	18	13588	11.5075	0.77606	0.0116224	1.31334
GOTERM_BP_FAT	GO:0043029~T cell homeostasis	5	0.126422	0.000771428	P2RX7, CASP3, CORO1A, FAS, TGFB1	328	18	13588	11.5075	0.77606	0.0116224	1.31334
GOTERM_BP_FAT	GO:0032755~positive regulation of interleukin-6 production	5	0.126422	0.000771428	P2RX7, TNF, ZCCHC11, TLR2, FCER1G	328	18	13588	11.5075	0.77606	0.0116224	1.31334
GOTERM_BP_FAT	GO:0045088~regulation of innate immune response	7	0.176991	0.000771956	H2-M3, SH2D1B1, TLR2, UNC93B1, MYO1F, SAMHD1, LAG3	328	46	13588	6.30408	0.776289	0.0115406	1.31424
GOTERM_BP_FAT	GO:0042035~regulation of cytokine biosynthetic process	8	0.202276	0.000839791	CD3E, TLR1, IRF1, INPP5D, LTB, LAG3, CD27, SPN	328	64	13588	5.17835	0.803882	0.0124529	1.42894
GOTERM_BP_FAT	GO:0030888~regulation of B cell proliferation	6	0.151707	0.000923891	CD38, PTPRC, CASP3, TNFSF13B, IL7, INPP5D	328	32	13588	7.76753	0.833416	0.0135882	1.57098
GOTERM_BP_FAT	GO:0009967~positive regulation of signal transduction	13	0.328698	0.00093663	ITGAL, PTPRC, TNF, CD8A, LYN, CD3E, HCLS1, P2RX7, DOCK2, ZAP70, TGM2, LTB, CD27	328	172	13588	3.1311	0.837484	0.0136707	1.59248
GOTERM_BP_FAT	GO:0046634~regulation of alpha-beta T cell activation	6	0.151707	0.00122741	PTPRC, IKZF1, CD3E, ZAP70, TNFRSF14, IL2RG	328	34	13588	7.31062	0.90758	0.017746	2.08199
GOTERM_BP_FAT	GO:0045637~regulation of myeloid cell differentiation	7	0.176991	0.00134222	TNF, IKZF1, LMO2, ETS1, FAS, INPP5D, RUNX1	328	51	13588	5.68604	0.926046	0.0192475	2.27464
GOTERM_BP_FAT	GO:0050672~negative regulation of lymphocyte proliferation	6	0.151707	0.00140414	CASP3, CD274, TNFRSF14, INPP5D, TGFB1, SPN	328	35	13588	7.10174	0.934424	0.0199795	2.37839
GOTERM_BP_FAT	GO:0032945~negative regulation of mononuclear cell proliferation	6	0.151707	0.00140414	CASP3, CD274, TNFRSF14, INPP5D, TGFB1, SPN	328	35	13588	7.10174	0.934424	0.0199795	2.37839
GOTERM_BP_FAT	GO:0070664~negative regulation of leukocyte proliferation	6	0.151707	0.00140414	CASP3, CD274, TNFRSF14, INPP5D, TGFB1, SPN	328	35	13588	7.10174	0.934424	0.0199795	2.37839
GOTERM_BP_FAT	GO:0048873~homeostasis of number of cells within a tissue	5	0.126422	0.00142531	P2RX7, CORO1A, IL7, F2R, CD7	328	21	13588	9.86353	0.937064	0.0201302	2.41383
GOTERM_BP_FAT	GO:0050730~regulation of peptidyl-tyrosine phosphorylation	7	0.176991	0.00164363	PTPRC, LYN, SH2D1B1, CD3E, HCLS1, SOCS1, TNFRSF14	328	53	13588	5.47147	0.958813	0.023013	2.77869
GOTERM_BP_FAT	GO:0006468~protein amino acid phosphorylation	29	0.733249	0.00168253	FGR, MAP4K1, TGFB1, CD74, BTK, IL12RB2, STK32C, STAT4, SH2D1B1, PTK6, ZAP70, MLKL, AKT3, CSF1R, PIK3CG, ITK, PTPRC, ALPK1, LYN, PRKCH, DAPK2, CCND1, P2RX7, CAMK4, FYN, LCK, RIPK3, TXK, F2R	328	640	13588	1.87715	0.96181	0.023383	2.84356
GOTERM_BP_FAT	GO:0050852~T cell receptor signaling pathway	5	0.126422	0.00170934	PTPRC, CD3E, CD247, ZAP70, THY1	328	22	13588	9.41519	0.963748	0.0235826	2.88825
GOTERM_BP_FAT	GO:0009306~protein secretion	5	0.126422	0.00170934	PLEK, TNFSF13B, CD27, LCP2, CXCL10	328	22	13588	9.41519	0.963748	0.0235826	2.88825
GOTERM_BP_FAT	GO:0043066~negative regulation of apoptosis	15	0.379267	0.00196848	PIK3CG, IL2RB, IL7, CLU, HSPA1A, PPT1, CD74, SERPINB9, CASP3, CASP4, TNFSF13B, FCER1G, FAS, CD27, F2R	328	239	13588	2.60001	0.978086	0.0269213	3.3192
GOTERM_BP_FAT	GO:0007626~locomotory behavior	15	0.379267	0.00196848	CCL3, PPT1, ITGB2, CCL5, CCL4, ITGAM, CXCL10, CCR9, LSP1, DOCK2, CORO1A, CCL20, RAC2, FCER1G, CMTM7	328	239	13588	2.60001	0.978086	0.0269213	3.3192
GOTERM_BP_FAT	GO:0051209~release of sequestered calcium ion into cytosol	4	0.101138	0.00197383	PTPRC, P2RX7, LCK, F2R	328	11	13588	15.0643	0.978313	0.0268047	3.32808
GOTERM_BP_FAT	GO:0060401~cytosolic calcium ion transport	4	0.101138	0.00197383	PTPRC, P2RX7, LCK, F2R	328	11	13588	15.0643	0.978313	0.0268047	3.32808
GOTERM_BP_FAT	GO:0060402~calcium ion transport into cytosol	4	0.101138	0.00197383	PTPRC, P2RX7, LCK, F2R	328	11	13588	15.0643	0.978313	0.0268047	3.32808
GOTERM_BP_FAT	GO:0051282~regulation of sequestering of calcium ion	4	0.101138	0.00197383	PTPRC, P2RX7, LCK, F2R	328	11	13588	15.0643	0.978313	0.0268047	3.32808
GOTERM_BP_FAT	GO:0051283~negative regulation of sequestering of calcium ion	4	0.101138	0.00197383	PTPRC, P2RX7, LCK, F2R	328	11	13588	15.0643	0.978313	0.0268047	3.32808
GOTERM_BP_FAT	GO:0010647~positive regulation of cell communication	13	0.328698	0.00209101	ITGAL, PTPRC, TNF, CD8A, LYN, CD3E, HCLS1, P2RX7, DOCK2, ZAP70, TGM2, LTB, CD27	328	189	13588	2.84946	0.982729	0.0281779	3.52234
GOTERM_BP_FAT	GO:0043069~negative regulation of programmed cell death	15	0.379267	0.0023827	PIK3CG, IL2RB, IL7, CLU, HSPA1A, PPT1, CD74, SERPINB9, CASP3, CASP4, TNFSF13B, FCER1G, FAS, CD27, F2R	328	244	13588	2.54673	0.990202	0.031829	4.00429
GOTERM_BP_FAT	GO:0031349~positive regulation of defense response	7	0.176991	0.00239779	H2-M3, C3, TLR2, TGM2, UNC93B1, FCER1G, LAG3	328	57	13588	5.08751	0.990485	0.0318087	4.02917
GOTERM_BP_FAT	GO:0060548~negative regulation of cell death	15	0.379267	0.00246998	PIK3CG, IL2RB, IL7, CLU, HSPA1A, PPT1, CD74, SERPINB9, CASP3, CASP4, TNFSF13B, FCER1G, FAS, CD27, F2R	328	245	13588	2.53634	0.991731	0.0325296	4.14807
GOTERM_BP_FAT	GO:0051085~chaperone mediated protein folding requiring cofactor	4	0.101138	0.00258514	H2-DMB1, H2-DMA, CD74, H2-DMB2	328	12	13588	13.8089	0.993389	0.0337931	4.33747
GOTERM_BP_FAT	GO:0001932~regulation of protein amino acid phosphorylation	10	0.252845	0.00258723	PTPRC, P2RX7, TNF, LYN, SH2D1B1, CD3E, SOCS3, HCLS1, SOCS1, TNFRSF14	328	121	13588	3.4237	0.993416	0.0335938	4.3409
GOTERM_BP_FAT	GO:0009968~negative regulation of signal transduction	12	0.303413	0.00286801	RGS10, PTPRC, P2RX7, CCND1, RGS1, CD3E, SOCS3, SLA2, SOCS1, INPP5D, SKIL, THY1	328	171	13588	2.90715	0.996186	0.0369296	4.80116
GOTERM_BP_FAT	GO:0008285~negative regulation of cell proliferation	14	0.353982	0.00305254	TNF, PTGS2, IFITM3, TNFRSF14, SKAP2, TGFB1, SLFN2, CASP3, CD274, INPP5D, EAF2, LTB, SPN, RUNX3	328	224	13588	2.58918	0.997336	0.0390037	5.10252
GOTERM_BP_FAT	GO:0042108~positive regulation of cytokine biosynthetic process	6	0.151707	0.00320806	CD3E, TLR1, IRF1, LTB, CD27, SPN	328	42	13588	5.91812	0.998031	0.0406854	5.35581
GOTERM_BP_FAT	GO:0046635~positive regulation of alpha-beta T cell activation	5	0.126422	0.00323895	PTPRC, IKZF1, CD3E, ZAP70, IL2RG	328	26	13588	7.9667	0.998146	0.0408033	5.40605
GOTERM_BP_FAT	GO:0030852~regulation of granulocyte differentiation	3	0.0758534	0.00335496	IKZF1, INPP5D, RUNX1	328	4	13588	31.0701	0.998521	0.0419639	5.59447
GOTERM_BP_FAT	GO:0002428~antigen processing and presentation of peptide antigen via MHC class Ib	3	0.0758534	0.00335496	H2-M3, TAP2, H2-Q1, H2-Q8	328	4	13588	31.0701	0.998521	0.0419639	5.59447
GOTERM_BP_FAT	GO:0019883~antigen processing and presentation of endogenous antigen	3	0.0758534	0.00335496	H2-M3, H2-Q1, TAPBPL, H2-Q8	328	4	13588	31.0701	0.998521	0.0419639	5.59447
GOTERM_BP_FAT	GO:0002483~antigen processing and presentation of endogenous peptide antigen	3	0.0758534	0.00335496	H2-M3, H2-Q1, TAPBPL, H2-Q8	328	4	13588	31.0701	0.998521	0.0419639	5.59447
GOTERM_BP_FAT	GO:0032101~regulation of response to external stimulus	9	0.22756	0.00338673	GPX2, KLK8, TNFRSF1B, PLEK, C3, TGM2, FCER1G, SPN, F2R	328	103	13588	3.61982	0.998609	0.0420825	5.64601
GOTERM_BP_FAT	GO:0050900~leukocyte migration	6	0.151707	0.00355995	CORO1A, TNF, FCER1G, ITGB2, SELPLG, ITGAM	328	43	13588	5.78049	0.999007	0.0439097	5.92655
GOTERM_BP_FAT	GO:0043269~regulation of ion transport	7	0.176991	0.00367526	TNF, SLC9A3, LTB, TGFB1, AKT3, F2R, THY1	328	62	13588	4.67722	0.999207	0.0450163	6.11288
GOTERM_BP_FAT	GO:0032680~regulation of tumor necrosis factor production	5	0.126422	0.00373117	TLR1, TLR2, FCER1G, CD14, SPN	328	27	13588	7.67164	0.999289	0.0454004	6.20309
GOTERM_BP_FAT	GO:0046640~regulation of alpha-beta T cell proliferation	4	0.101138	0.00412727	PTPRC, CD3E, ZAP70, TNFRSF14	328	14	13588	11.8362	0.999671	0.049796	6.8399
GOTERM_BP_FAT	GO:0051084~'de novo' posttranslational protein folding	4	0.101138	0.00412727	H2-DMB1, H2-DMA, CD74, H2-DMB2	328	14	13588	11.8362	0.999671	0.049796	6.8399
GOTERM_BP_FAT	GO:0045191~regulation of isotype switching	4	0.101138	0.00412727	PTPRC, IL27RA, TBX21, TGFB1	328	14	13588	11.8362	0.999671	0.049796	6.8399
GOTERM_BP_FAT	GO:0006458~'de novo' protein folding	4	0.101138	0.00412727	H2-DMB1, H2-DMA, CD74, H2-DMB2	328	14	13588	11.8362	0.999671	0.049796	6.8399
GOTERM_BP_FAT	GO:0042130~negative regulation of T cell proliferation	5	0.126422	0.00427173	CASP3, CD274, TNFRSF14, TGFB1, SPN	328	28	13588	7.39765	0.999752	0.0511794	7.07113
GOTERM_BP_FAT	GO:0007610~behavior	20	0.505689	0.00440212	KLK8, CCL3, GM2A, IL18, PPT1, ITGB2, CCL5, CCL4, ITGAM, CXCL10, CCR9, LSP1, DOCK2, CORO1A, RAC2, CCL20, FCER1G, CMTM7, RUNX1, GLP1R	328	405	13588	2.04577	0.999807	0.0523805	7.27937
GOTERM_BP_FAT	GO:0016310~phosphorylation	30	0.758534	0.00443308	FGR, HK2, MAP4K1, TGFB1, CD74, BTK, IL12RB2, STK32C, STAT4, SH2D1B1, PTK6, ZAP70, MLKL, AKT3, CSF1R, PIK3CG, ITK, PTPRC, ALPK1, LYN, PRKCH, DAPK2, CCND1, P2RX7, CAMK4, FYN, LCK, RIPK3, TXK, F2R	328	718	13588	1.73093	0.999819	0.052419	7.32876
GOTERM_BP_FAT	GO:0042325~regulation of phosphorylation	16	0.404551	0.00451394	PTPRC, TNF, LYN, CD3E, SOCS3, HCLS1, SOCS1, TLR1, CENPE, TNFRSF14, CD74, THY1, CASP3, P2RX7, SH2D1B1, F2R	328	290	13588	2.28562	0.999845	0.0530288	7.45762
GOTERM_BP_FAT	GO:0006921~cell structure disassembly during apoptosis	4	0.101138	0.00506801	CASP3, GZMA, PPT1, APAF1	328	15	13588	11.0472	0.999947	0.0590017	8.33604
GOTERM_BP_FAT	GO:0010740~positive regulation of protein kinase cascade	8	0.202276	0.00526293	PTPRC, P2RX7, TNF, LYN, HCLS1, TGM2, LTB, CD27	328	88	13588	3.76608	0.999964	0.060842	8.64319
GOTERM_BP_FAT	GO:0032940~secretion by cell	12	0.303413	0.00539508	LAT, P2RX7, LAT2, PLEK, TNFSF13B, LY6E, MYO1F, PPT1, CD27, GLP1R, LCP2, CXCL10	328	186	13588	2.6727	0.999972	0.0619571	8.85089
GOTERM_BP_FAT	GO:0010648~negative regulation of cell communication	12	0.303413	0.00539508	RGS10, PTPRC, P2RX7, CCND1, RGS1, CD3E, SOCS3, SLA2, SOCS1, INPP5D, SKIL, THY1	328	186	13588	2.6727	0.999972	0.0619571	8.85089
GOTERM_BP_FAT	GO:0006953~acute-phase response	5	0.126422	0.00550622	SAA2, SAA1, SAA3, REG3G, FN1	328	30	13588	6.90447	0.999978	0.062825	9.02521
GOTERM_BP_FAT	GO:0010604~positive regulation of macromolecule metabolic process	27	0.68268	0.0056245	TNF, TBX21, TLR1, TGFB1, BARX2, SH2D1B1, GATA4, NFATC2, RUNX1, LTB, SPN, CD27, PTPRC, IL2RB, IKZF2, IKZF1, LYN, CD3E, HCLS1, TNFRSF14, P2RX7, TNFSF13B, ETS1, IRF8, IRF1, EAF2, PRDM1	328	633	13588	1.76702	0.999982	0.0637603	9.2104
GOTERM_BP_FAT	GO:0050850~positive regulation of calcium-mediated signaling	4	0.101138	0.00612756	ITGAL, CD8A, CD3E, ZAP70	328	16	13588	10.3567	0.999993	0.0688777	9.99404
GOTERM_BP_FAT	GO:0002366~leukocyte activation during immune response	5	0.126422	0.00620417	LAT, LAT2, H2-M3, MYO1F, LCP1	328	31	13588	6.68175	0.999994	0.0693105	10.1128
GOTERM_BP_FAT	GO:0002263~cell activation during immune response	5	0.126422	0.00620417	LAT, LAT2, H2-M3, MYO1F, LCP1	328	31	13588	6.68175	0.999994	0.0693105	10.1128
GOTERM_BP_FAT	GO:0051174~regulation of phosphorus metabolic process	16	0.404551	0.00634656	PTPRC, TNF, LYN, CD3E, SOCS3, HCLS1, SOCS1, TLR1, CENPE, TNFRSF14, CD74, THY1, CASP3, P2RX7, SH2D1B1, F2R	328	301	13588	2.20209	0.999996	0.0704443	10.3332
GOTERM_BP_FAT	GO:0019220~regulation of phosphate metabolic process	16	0.404551	0.00634656	PTPRC, TNF, LYN, CD3E, SOCS3, HCLS1, SOCS1, TLR1, CENPE, TNFRSF14, CD74, THY1, CASP3, P2RX7, SH2D1B1, F2R	328	301	13588	2.20209	0.999996	0.0704443	10.3332
GOTERM_BP_FAT	GO:0031399~regulation of protein modification process	11	0.278129	0.00663668	PTPRC, P2RX7, TNF, LYN, SH2D1B1, CD3E, SOCS3, HCLS1, SOCS1, TNFRSF14, TGFB1	328	165	13588	2.76179	0.999998	0.073137	10.7806
GOTERM_BP_FAT	GO:0007160~cell-matrix adhesion	6	0.151707	0.00683663	ITGB7, ITGB6, ITGB2, FN1, MUC4, THY1	328	50	13588	4.97122	0.999998	0.0748395	11.0878
GOTERM_BP_FAT	GO:0001894~tissue homeostasis	6	0.151707	0.00683663	XDH, P2RX7, CORO1A, IL7, F2R, CD7	328	50	13588	4.97122	0.999998	0.0748395	11.0878
GOTERM_BP_FAT	GO:0048871~multicellular organismal homeostasis	7	0.176991	0.00715571	XDH, GPX2, P2RX7, CORO1A, IL7, F2R, CD7	328	71	13588	4.08434	0.999999	0.0777677	11.5759
GOTERM_BP_FAT	GO:0002474~antigen processing and presentation of peptide antigen via MHC class I	4	0.101138	0.00730957	H2-Q1, FCER1G, H2-T23, TAPBPL, H2-Q8	328	17	13588	9.74749	0.999999	0.0789374	11.8103
GOTERM_BP_FAT	GO:0002444~myeloid leukocyte mediated immunity	4	0.101138	0.00730957	LAT, LAT2, NCF1, MYO1F	328	17	13588	9.74749	0.999999	0.0789374	11.8103
GOTERM_BP_FAT	GO:0044093~positive regulation of molecular function	16	0.404551	0.00732166	PTPRC, TNF, ADCY7, GM2A, TLR1, TLR2, ITGB2, CENPE, CD74, TGFB1, THY1, P2RX7, LCK, TGM2, APAF1, F2R	328	306	13588	2.16611	0.999999	0.0786271	11.8287
GOTERM_BP_FAT	GO:0019722~calcium-mediated signaling	4	0.101138	0.0086172	LAT, LAT2, TNF, LTB	328	18	13588	9.20596	1	0.0914381	13.7794
GOTERM_BP_FAT	GO:0002861~regulation of inflammatory response to antigenic stimulus	4	0.101138	0.0086172	GPX2, C3, FCER1G, SPN	328	18	13588	9.20596	1	0.0914381	13.7794
GOTERM_BP_FAT	GO:0010038~response to metal ion	6	0.151707	0.00873553	XDH, P2RX7, CCND1, GATM, HVCN1, TAT	328	53	13588	4.68983	1	0.0921376	13.9555
GOTERM_BP_FAT	GO:0051130~positive regulation of cellular component organization	9	0.22756	0.00928622	TNF, PLEK, C3, FCER1G, CENPE, PPT1, SEMA4D, LTB, TGFB1	328	122	13588	3.05608	1	0.0971546	14.7708
GOTERM_BP_FAT	GO:0006959~humoral immune response	6	0.151707	0.00944197	C1QB, TNF, C3, IGJ, CFI, C2	328	54	13588	4.60298	1	0.0981819	15
GOTERM_BP_FAT	GO:0050731~positive regulation of peptidyl-tyrosine phosphorylation	5	0.126422	0.00957762	LYN, SH2D1B1, CD3E, HCLS1, TNFRSF14	328	35	13588	5.91812	1	0.0989988	15.1992
GOTERM_BP_FAT	GO:0006796~phosphate metabolic process	33	0.834387	0.0102861	FGR, HK2, MAP4K1, TGFB1, CD74, BTK, IL12RB2, STK32C, STAT4, SH2D1B1, PTK6, ZAP70, MLKL, AKT3, CSF1R, PIK3CG, PTPN7, ITK, PTPRC, ALPK1, LYN, PRKCH, DAPK2, CCND1, P2RX7, CAMK4, FYN, PPM1H, LCK, RIPK3, TXK, DUSP6, F2R	328	866	13588	1.57862	1	0.105399	16.2324
GOTERM_BP_FAT	GO:0006793~phosphorus metabolic process	33	0.834387	0.0102861	FGR, HK2, MAP4K1, TGFB1, CD74, BTK, IL12RB2, STK32C, STAT4, SH2D1B1, PTK6, ZAP70, MLKL, AKT3, CSF1R, PIK3CG, PTPN7, ITK, PTPRC, ALPK1, LYN, PRKCH, DAPK2, CCND1, P2RX7, CAMK4, FYN, PPM1H, LCK, RIPK3, TXK, DUSP6, F2R	328	866	13588	1.57862	1	0.105399	16.2324
GOTERM_BP_FAT	GO:0032270~positive regulation of cellular protein metabolic process	8	0.202276	0.0104105	P2RX7, TNF, LYN, SH2D1B1, CD3E, HCLS1, TNFRSF14, TGFB1	328	100	13588	3.31415	1	0.106053	16.4126
GOTERM_BP_FAT	GO:0007204~elevation of cytosolic calcium ion concentration	5	0.126422	0.010575	PTPRC, P2RX7, LCK, TGM2, F2R	328	36	13588	5.75373	1	0.107085	16.6502
GOTERM_BP_FAT	GO:0001934~positive regulation of protein amino acid phosphorylation	6	0.151707	0.0109709	P2RX7, LYN, SH2D1B1, CD3E, HCLS1, TNFRSF14	328	56	13588	4.43859	1	0.110313	17.2198
GOTERM_BP_FAT	GO:0031401~positive regulation of protein modification process	7	0.176991	0.0111676	P2RX7, LYN, SH2D1B1, CD3E, HCLS1, TNFRSF14, TGFB1	328	78	13588	3.71779	1	0.111612	17.5014
GOTERM_BP_FAT	GO:0002475~antigen processing and presentation via MHC class Ib	3	0.0758534	0.0111927	H2-M3, TAP2, H2-Q1, H2-Q8	328	7	13588	17.7544	1	0.11128	17.5373
GOTERM_BP_FAT	GO:0032845~negative regulation of homeostatic process	3	0.0758534	0.0111927	P2RX7, INPP5D, TGFB1	328	7	13588	17.7544	1	0.11128	17.5373
GOTERM_BP_FAT	GO:0030335~positive regulation of cell migration	5	0.126422	0.011637	CORO1A, TLR2, MYO1F, ARHGAP8, CXCL10	328	37	13588	5.59822	1	0.114873	18.1697
GOTERM_BP_FAT	GO:0050727~regulation of inflammatory response	6	0.151707	0.0117952	GPX2, TNFRSF1B, C3, TGM2, FCER1G, SPN	328	57	13588	4.36072	1	0.115764	18.3938
GOTERM_BP_FAT	GO:0031589~cell-substrate adhesion	6	0.151707	0.0117952	ITGB7, ITGB6, ITGB2, FN1, MUC4, THY1	328	57	13588	4.36072	1	0.115764	18.3938
GOTERM_BP_FAT	GO:0032496~response to lipopolysaccharide	5	0.126422	0.0127653	IL12RB2, P2RX7, STAT1, CD14, F2R	328	38	13588	5.4509	1	0.124103	19.7553
GOTERM_BP_FAT	GO:0051480~cytosolic calcium ion homeostasis	5	0.126422	0.0127653	PTPRC, P2RX7, LCK, TGM2, F2R	328	38	13588	5.4509	1	0.124103	19.7553
GOTERM_BP_FAT	GO:0007242~intracellular signaling cascade	34	0.859671	0.0128745	TNF, ADCY7, TLR1, MAP4K1, CD74, BTK, HMHA1, RAC2, RASGRP1, ZAP70, TGM2, NOS2, INPP5D, LTB, PIK3CG, ITK, PTPRC, RAB8B, LYN, PLEK, SOCS3, ARHGEF6, SOCS1, PRKCH, DAPK2, VAV1, LAT, CCND1, P2RX7, LAT2, RASSF5, RIPK3, ASB2, F2R	328	915	13588	1.53936	1	0.124483	19.9073
GOTERM_BP_FAT	GO:0006308~DNA catabolic process	4	0.101138	0.0133188	DNASE1, CASP3, PPT1, APAF1	328	21	13588	7.89082	1	0.127886	20.5226
GOTERM_BP_FAT	GO:0051050~positive regulation of transport	9	0.22756	0.0144784	P2RX7, TNF, C3, FCER1G, PPT1, LTB, AKT3, F2R, THY1	328	132	13588	2.82456	1	0.137618	22.1077
GOTERM_BP_FAT	GO:0042327~positive regulation of phosphorylation	6	0.151707	0.0145184	P2RX7, LYN, SH2D1B1, CD3E, HCLS1, TNFRSF14	328	60	13588	4.14268	1	0.137306	22.1618
GOTERM_BP_FAT	GO:0050732~negative regulation of peptidyl-tyrosine phosphorylation	3	0.0758534	0.014688	PTPRC, SH2D1B1, SOCS1	328	8	13588	15.5351	1	0.138137	22.391
GOTERM_BP_FAT	GO:0060249~anatomical structure homeostasis	7	0.176991	0.0148644	XDH, P2RX7, CORO1A, IL7, HSPA1A, F2R, CD7	328	83	13588	3.49383	1	0.139019	22.6287
GOTERM_BP_FAT	GO:0030890~positive regulation of B cell proliferation	4	0.101138	0.0151519	CD38, PTPRC, TNFSF13B, IL7	328	22	13588	7.53215	1	0.140855	23.0145
GOTERM_BP_FAT	GO:0016042~lipid catabolic process	9	0.22756	0.0157288	SMPDL3B, PLB1, GM2A, SMPDL3A, PLA2G7, APOC2, PPT1, PLA2G4C, PLA2G5	328	134	13588	2.7824	1	0.145159	23.7835
GOTERM_BP_FAT	GO:0051247~positive regulation of protein metabolic process	8	0.202276	0.0161661	P2RX7, TNF, LYN, SH2D1B1, CD3E, HCLS1, TNFRSF14, TGFB1	328	109	13588	3.0405	1	0.148212	24.3615
GOTERM_BP_FAT	GO:0006665~sphingolipid metabolic process	6	0.151707	0.0165506	P2RX7, B3GNT5, SMPDL3B, GM2A, SMPDL3A, ASAH2	328	62	13588	4.00905	1	0.150779	24.8664
GOTERM_BP_FAT	GO:0010562~positive regulation of phosphorus metabolic process	6	0.151707	0.0165506	P2RX7, LYN, SH2D1B1, CD3E, HCLS1, TNFRSF14	328	62	13588	4.00905	1	0.150779	24.8664
GOTERM_BP_FAT	GO:0045937~positive regulation of phosphate metabolic process	6	0.151707	0.0165506	P2RX7, LYN, SH2D1B1, CD3E, HCLS1, TNFRSF14	328	62	13588	4.00905	1	0.150779	24.8664
GOTERM_BP_FAT	GO:0051272~positive regulation of cell motion	5	0.126422	0.0165599	CORO1A, TLR2, MYO1F, ARHGAP8, CXCL10	328	41	13588	5.05205	1	0.150159	24.8785
GOTERM_BP_FAT	GO:0046631~alpha-beta T cell activation	4	0.101138	0.0171201	DOCK2, H2-M3, IRF1, ZAP70	328	23	13588	7.20467	1	0.154153	25.6082
GOTERM_BP_FAT	GO:0007155~cell adhesion	23	0.581542	0.0172064	PARVG, PTPRC, ITGAL, ICAM1, PLEK, ITGAE, ITGB2, ITGA4, ITGAM, MUC4, THY1, CD84, CD96, BARX2, CD44, ITGAX, ITGB7, ITGB6, CYFIP2, AMICA1, CD6, SELPLG, FN1	328	561	13588	1.69843	1	0.154165	25.72
GOTERM_BP_FAT	GO:0022610~biological adhesion	23	0.581542	0.0176568	PARVG, PTPRC, ITGAL, ICAM1, PLEK, ITGAE, ITGB2, ITGA4, ITGAM, MUC4, THY1, CD84, CD96, BARX2, CD44, ITGAX, ITGB7, ITGB6, CYFIP2, AMICA1, CD6, SELPLG, FN1	328	562	13588	1.6954	1	0.15718	26.301
GOTERM_BP_FAT	GO:0046903~secretion	12	0.303413	0.0181336	LAT, P2RX7, LAT2, PLEK, TNFSF13B, LY6E, MYO1F, PPT1, CD27, GLP1R, LCP2, CXCL10	328	221	13588	2.24942	1	0.160373	26.9115
GOTERM_BP_FAT	GO:0051789~response to protein stimulus	7	0.176991	0.0183765	CD48, P2RX7, CCND1, CASP12, FAS, CLIC1, TGFB1	328	87	13588	3.33319	1	0.161627	27.2206
GOTERM_BP_FAT	GO:0006643~membrane lipid metabolic process	6	0.151707	0.0187636	P2RX7, B3GNT5, SMPDL3B, GM2A, SMPDL3A, ASAH2	328	64	13588	3.88377	1	0.16403	27.7107
GOTERM_BP_FAT	GO:0000018~regulation of DNA recombination	4	0.101138	0.0192243	PTPRC, IL27RA, TBX21, TGFB1	328	24	13588	6.90447	1	0.166993	28.2899
GOTERM_BP_FAT	GO:0006916~anti-apoptosis	7	0.176991	0.0193361	SERPINB9, IL2RB, TNFSF13B, IL7, CLU, HSPA1A, CD27	328	88	13588	3.29532	1	0.167147	28.4298
GOTERM_BP_FAT	GO:0001816~cytokine production	5	0.126422	0.0194429	IL12RB2, ZCCHC11, IL18, NFATC2, LCP2	328	43	13588	4.81707	1	0.16726	28.5632
GOTERM_BP_FAT	GO:0051223~regulation of protein transport	6	0.151707	0.0199396	P2RX7, TNF, LTB, LCP1, TGFB1, SRGN	328	65	13588	3.82402	1	0.17044	29.1807
GOTERM_BP_FAT	GO:0051605~protein maturation by peptide bond cleavage	6	0.151707	0.0199396	C1QB, SEC11C, C3, CFI, C2, SRGN	328	65	13588	3.82402	1	0.17044	29.1807
GOTERM_BP_FAT	GO:0048732~gland development	11	0.278129	0.020904	XDH, CCND1, TNF, IKZF1, LY6E, CD44, DUOX2, HK2, TGM2, AREG, TGFB1	328	197	13588	2.31317	1	0.177214	30.365
GOTERM_BP_FAT	GO:0040017~positive regulation of locomotion	5	0.126422	0.0209933	CORO1A, TLR2, MYO1F, ARHGAP8, CXCL10	328	44	13588	4.70759	1	0.177143	30.4737
GOTERM_BP_FAT	GO:0016485~protein processing	7	0.176991	0.0213564	C1QB, P2RX7, SEC11C, C3, CFI, C2, SRGN	328	90	13588	3.22209	1	0.179176	30.9142
GOTERM_BP_FAT	GO:0032880~regulation of protein localization	7	0.176991	0.0213564	P2RX7, TNF, CENPE, LTB, LCP1, TGFB1, SRGN	328	90	13588	3.22209	1	0.179176	30.9142
GOTERM_BP_FAT	GO:0051092~positive regulation of NF-kappaB transcription factor activity	4	0.101138	0.0214649	TNF, TLR2, ITGB2, TGFB1	328	25	13588	6.62829	1	0.179244	31.0453
GOTERM_BP_FAT	GO:0045639~positive regulation of myeloid cell differentiation	4	0.101138	0.0214649	IKZF1, ETS1, INPP5D, RUNX1	328	25	13588	6.62829	1	0.179244	31.0453
GOTERM_BP_FAT	GO:0048302~regulation of isotype switching to IgG isotypes	3	0.0758534	0.0228684	PTPRC, IL27RA, TBX21	328	10	13588	12.428	1	0.1891	32.72
GOTERM_BP_FAT	GO:0051955~regulation of amino acid transport	3	0.0758534	0.0228684	P2RX7, TNF, LTB	328	10	13588	12.428	1	0.1891	32.72
GOTERM_BP_FAT	GO:0045830~positive regulation of isotype switching	3	0.0758534	0.0228684	PTPRC, TBX21, TGFB1	328	10	13588	12.428	1	0.1891	32.72
GOTERM_BP_FAT	GO:0046641~positive regulation of alpha-beta T cell proliferation	3	0.0758534	0.0228684	PTPRC, CD3E, ZAP70	328	10	13588	12.428	1	0.1891	32.72
GOTERM_BP_FAT	GO:0032890~regulation of organic acid transport	3	0.0758534	0.0228684	P2RX7, TNF, LTB	328	10	13588	12.428	1	0.1891	32.72
GOTERM_BP_FAT	GO:0043299~leukocyte degranulation	3	0.0758534	0.0228684	LAT, LAT2, MYO1F	328	10	13588	12.428	1	0.1891	32.72
GOTERM_BP_FAT	GO:0009101~glycoprotein biosynthetic process	8	0.202276	0.0229179	ST6GAL1, B3GNT5, B3GALT5, B3GNT7, ST8SIA4, CHSY1, FUT2, EXT1	328	117	13588	2.8326	1	0.18868	32.7784
GOTERM_BP_FAT	GO:0019932~second-messenger-mediated signaling	8	0.202276	0.0238803	PIK3CG, LAT, LAT2, TNF, TGM2, NOS2, LTB, F2R	328	118	13588	2.8086	1	0.195046	33.9037
GOTERM_BP_FAT	GO:0042592~homeostatic process	23	0.581542	0.0251545	XDH, SLC9A9, PTPRC, LYN, IL7, HCLS1, SLC9A3, HSPA1A, PPT1, TGFB1, GPX2, CORO1A, CASP3, P2RX7, TNFSF13B, SLC30A1, FYN, LCK, TGM2, FAS, SKIL, F2R, CD7	328	584	13588	1.63154	1	0.203592	35.3664
GOTERM_BP_FAT	GO:0030155~regulation of cell adhesion	7	0.176991	0.0258154	ICAM1, ITGAL, IL18, TGM2, MYO1F, VAV1, SPN	328	94	13588	3.08498	1	0.207554	36.1129
GOTERM_BP_FAT	GO:0048771~tissue remodeling	5	0.126422	0.0260901	XDH, IL7, TGM2, NOS2, ITGA4	328	47	13588	4.40711	1	0.20869	36.4208
GOTERM_BP_FAT	GO:0030595~leukocyte chemotaxis	4	0.101138	0.0263561	CORO1A, FCER1G, ITGB2, ITGAM	328	27	13588	6.13731	1	0.209753	36.7176
GOTERM_BP_FAT	GO:0060326~cell chemotaxis	4	0.101138	0.0263561	CORO1A, FCER1G, ITGB2, ITGAM	328	27	13588	6.13731	1	0.209753	36.7176
GOTERM_BP_FAT	GO:0045911~positive regulation of DNA recombination	3	0.0758534	0.0275116	PTPRC, TBX21, TGFB1	328	11	13588	11.2982	1	0.21711	37.992
GOTERM_BP_FAT	GO:0007243~protein kinase cascade	12	0.303413	0.0277652	PTPRC, P2RX7, TNF, PLEK, SOCS1, TLR1, RIPK3, MAP4K1, DAPK2, CD74, F2R, BTK	328	236	13588	2.10645	1	0.218029	38.2684
GOTERM_BP_FAT	GO:0010959~regulation of metal ion transport	5	0.126422	0.0279397	SLC9A3, TGFB1, AKT3, F2R, THY1	328	48	13588	4.31529	1	0.218387	38.4579
GOTERM_BP_FAT	GO:0070201~regulation of establishment of protein localization	6	0.151707	0.0280099	P2RX7, TNF, LTB, LCP1, TGFB1, SRGN	328	71	13588	3.50086	1	0.218016	38.534
GOTERM_BP_FAT	GO:0030099~myeloid cell differentiation	7	0.176991	0.0282609	TNF, LYN, HCLS1, IRF8, SPIB, TGFB1, THPO	328	96	13588	3.02071	1	0.218901	38.8054
GOTERM_BP_FAT	GO:0051604~protein maturation	7	0.176991	0.0282609	C1QB, P2RX7, SEC11C, C3, CFI, C2, SRGN	328	96	13588	3.02071	1	0.218901	38.8054
GOTERM_BP_FAT	GO:0002761~regulation of myeloid leukocyte differentiation	4	0.101138	0.031792	TNF, IKZF1, INPP5D, RUNX1	328	29	13588	5.71405	1	0.242093	42.5052
GOTERM_BP_FAT	GO:0045646~regulation of erythrocyte differentiation	3	0.0758534	0.0324969	LMO2, ETS1, INPP5D	328	12	13588	10.3567	1	0.245873	43.218
GOTERM_BP_FAT	GO:0042100~B cell proliferation	3	0.0758534	0.0324969	PTPRC, CD79A, CD27	328	12	13588	10.3567	1	0.245873	43.218
GOTERM_BP_FAT	GO:0002275~myeloid cell activation during immune response	3	0.0758534	0.0324969	LAT, LAT2, MYO1F	328	12	13588	10.3567	1	0.245873	43.218
GOTERM_BP_FAT	GO:0010627~regulation of protein kinase cascade	9	0.22756	0.0339024	PTPRC, P2RX7, TNF, LYN, HCLS1, SOCS1, TGM2, LTB, CD27	328	155	13588	2.40543	1	0.254216	44.6147
GOTERM_BP_FAT	GO:0055080~cation homeostasis	10	0.252845	0.0340309	SLC9A9, PTPRC, P2RX7, SLC30A1, SLC9A3, LCK, TGM2, PPT1, TGFB1, F2R	328	184	13588	2.25146	1	0.254101	44.7408
GOTERM_BP_FAT	GO:0006958~complement activation, classical pathway	4	0.101138	0.0347127	C1QB, C3, CFI, C2	328	30	13588	5.52358	1	0.257582	45.4051
GOTERM_BP_FAT	GO:0031348~negative regulation of defense response	4	0.101138	0.0347127	GPX2, TNFRSF1B, SH2D1B1, SPN	328	30	13588	5.52358	1	0.257582	45.4051
GOTERM_BP_FAT	GO:0010638~positive regulation of organelle organization	5	0.126422	0.0361043	TNF, PLEK, CENPE, LTB, TGFB1	328	52	13588	3.98335	1	0.265572	46.7379
GOTERM_BP_FAT	GO:0002823~negative regulation of adaptive immune response based on somatic recombination of immune receptors built from immunoglobulin superfamily domains	3	0.0758534	0.0378052	PTPRC, IL27RA, SPN	328	13	13588	9.56004	1	0.27537	48.3253
GOTERM_BP_FAT	GO:0050854~regulation of antigen receptor-mediated signaling pathway	3	0.0758534	0.0378052	PTPRC, LCK, THY1	328	13	13588	9.56004	1	0.27537	48.3253
GOTERM_BP_FAT	GO:0002883~regulation of hypersensitivity	3	0.0758534	0.0378052	C3, FCER1G, SPN	328	13	13588	9.56004	1	0.27537	48.3253
GOTERM_BP_FAT	GO:0046466~membrane lipid catabolic process	3	0.0758534	0.0378052	SMPDL3B, GM2A, SMPDL3A	328	13	13588	9.56004	1	0.27537	48.3253
GOTERM_BP_FAT	GO:0006309~DNA fragmentation involved in apoptosis	3	0.0758534	0.0378052	CASP3, PPT1, APAF1	328	13	13588	9.56004	1	0.27537	48.3253
GOTERM_BP_FAT	GO:0002820~negative regulation of adaptive immune response	3	0.0758534	0.0378052	PTPRC, IL27RA, SPN	328	13	13588	9.56004	1	0.27537	48.3253
GOTERM_BP_FAT	GO:0030149~sphingolipid catabolic process	3	0.0758534	0.0378052	SMPDL3B, GM2A, SMPDL3A	328	13	13588	9.56004	1	0.27537	48.3253
GOTERM_BP_FAT	GO:0045055~regulated secretory pathway	3	0.0758534	0.0378052	LAT, LAT2, MYO1F	328	13	13588	9.56004	1	0.27537	48.3253
GOTERM_BP_FAT	GO:0002864~regulation of acute inflammatory response to antigenic stimulus	3	0.0758534	0.0378052	C3, FCER1G, SPN	328	13	13588	9.56004	1	0.27537	48.3253
GOTERM_BP_FAT	GO:0042113~B cell activation	6	0.151707	0.0397293	PTPRC, LAT2, IKZF1, CD79A, SKAP2, CD27	328	78	13588	3.18668	1	0.286355	50.0672
GOTERM_BP_FAT	GO:0002707~negative regulation of lymphocyte mediated immunity	3	0.0758534	0.0434182	PTPRC, SH2D1B1, SPN	328	14	13588	8.87718	1	0.307759	53.2534
GOTERM_BP_FAT	GO:0002891~positive regulation of immunoglobulin mediated immune response	3	0.0758534	0.0434182	PTPRC, C3, FCER1G	328	14	13588	8.87718	1	0.307759	53.2534
GOTERM_BP_FAT	GO:0002714~positive regulation of B cell mediated immunity	3	0.0758534	0.0434182	PTPRC, C3, FCER1G	328	14	13588	8.87718	1	0.307759	53.2534
GOTERM_BP_FAT	GO:0002704~negative regulation of leukocyte mediated immunity	3	0.0758534	0.0434182	PTPRC, SH2D1B1, SPN	328	14	13588	8.87718	1	0.307759	53.2534
GOTERM_BP_FAT	GO:0051345~positive regulation of hydrolase activity	6	0.151707	0.0455405	GM2A, LCK, TGM2, APAF1, F2R, THY1	328	81	13588	3.06865	1	0.319265	54.9987
GOTERM_BP_FAT	GO:0009725~response to hormone stimulus	9	0.22756	0.0462177	LYN, GATM, HCLS1, SLC9A3, SPRR2B, FAS, AREG, TAT, AKT3	328	165	13588	2.25965	1	0.322119	55.5425
GOTERM_BP_FAT	GO:0045658~regulation of neutrophil differentiation	2	0.0505689	0.0475533	IKZF1, INPP5D	328	2	13588	41.4268	1	0.328747	56.597
GOTERM_BP_FAT	GO:0030854~positive regulation of granulocyte differentiation	2	0.0505689	0.0475533	IKZF1, RUNX1	328	2	13588	41.4268	1	0.328747	56.597
GOTERM_BP_FAT	GO:0015860~purine nucleoside transport	2	0.0505689	0.0475533	SLC28A2, SLC28A3	328	2	13588	41.4268	1	0.328747	56.597
GOTERM_BP_FAT	GO:0002476~antigen processing and presentation of endogenous peptide antigen via MHC class Ib	2	0.0505689	0.0475533	H2-M3, H2-Q1, H2-Q8	328	2	13588	41.4268	1	0.328747	56.597
GOTERM_BP_FAT	GO:0051336~regulation of hydrolase activity	10	0.252845	0.0475748	TBC1D10C, GM2A, LCK, TGM2, HSPA1A, PPT1, APAF1, VAV1, F2R, THY1	328	196	13588	2.11361	1	0.327745	56.6138
GOTERM_BP_FAT	GO:0051091~positive regulation of transcription factor activity	4	0.101138	0.0477205	TNF, TLR2, ITGB2, TGFB1	328	34	13588	4.87374	1	0.327463	56.7274
GOTERM_BP_FAT	GO:0051785~positive regulation of nuclear division	3	0.0758534	0.0493182	TNF, CENPE, LTB	328	15	13588	8.28537	1	0.335427	57.9544
GOTERM_BP_FAT	GO:0051607~defense response to virus	3	0.0758534	0.0493182	PTPRC, H2-Q1, SAMHD1, H2-Q8	328	15	13588	8.28537	1	0.335427	57.9544
GOTERM_BP_FAT	GO:0045840~positive regulation of mitosis	3	0.0758534	0.0493182	TNF, CENPE, LTB	328	15	13588	8.28537	1	0.335427	57.9544
GOTERM_BP_FAT	GO:0000737~DNA catabolic process, endonucleolytic	3	0.0758534	0.0493182	CASP3, PPT1, APAF1	328	15	13588	8.28537	1	0.335427	57.9544
GOTERM_BP_FAT	GO:0042509~regulation of tyrosine phosphorylation of STAT protein	3	0.0758534	0.0493182	LYN, HCLS1, SOCS1	328	15	13588	8.28537	1	0.335427	57.9544
GOTERM_BP_FAT	GO:0032760~positive regulation of tumor necrosis factor production	3	0.0758534	0.0493182	TLR2, FCER1G, CD14	328	15	13588	8.28537	1	0.335427	57.9544
GOTERM_BP_FAT	GO:0045429~positive regulation of nitric oxide biosynthetic process	3	0.0758534	0.0493182	H2-M3, TLR2, ITGB2	328	15	13588	8.28537	1	0.335427	57.9544
GOTERM_BP_FAT	GO:0043085~positive regulation of catalytic activity	12	0.303413	0.0512099	PTPRC, P2RX7, ADCY7, GM2A, LCK, TLR1, TGM2, CENPE, APAF1, CD74, F2R, THY1	328	261	13588	1.90468	1	0.344883	59.3649
GOTERM_BP_FAT	GO:0002455~humoral immune response mediated by circulating immunoglobulin	4	0.101138	0.0512964	C1QB, C3, CFI, C2	328	35	13588	4.73449	1	0.344216	59.4283
GOTERM_BP_FAT	GO:0022612~gland morphogenesis	6	0.151707	0.0518329	TNF, CD44, DUOX2, TGM2, AREG, TGFB1	328	84	13588	2.95906	1	0.346035	59.8196
GOTERM_BP_FAT	GO:0051090~regulation of transcription factor activity	5	0.126422	0.0533705	TNF, ZCCHC11, TLR2, ITGB2, TGFB1	328	59	13588	3.51075	1	0.35329	60.9213
GOTERM_BP_FAT	GO:0002541~activation of plasma proteins involved in acute inflammatory response	4	0.101138	0.0549984	C1QB, C3, CFI, C2	328	36	13588	4.60298	1	0.360904	62.0567
GOTERM_BP_FAT	GO:0006956~complement activation	4	0.101138	0.0549984	C1QB, C3, CFI, C2	328	36	13588	4.60298	1	0.360904	62.0567
GOTERM_BP_FAT	GO:0032102~negative regulation of response to external stimulus	4	0.101138	0.0549984	GPX2, KLK8, TNFRSF1B, SPN	328	36	13588	4.60298	1	0.360904	62.0567
GOTERM_BP_FAT	GO:0045089~positive regulation of innate immune response	4	0.101138	0.0549984	H2-M3, TLR2, UNC93B1, LAG3	328	36	13588	4.60298	1	0.360904	62.0567
GOTERM_BP_FAT	GO:0045577~regulation of B cell differentiation	3	0.0758534	0.0554883	PTPRC, IL2RG, INPP5D	328	16	13588	7.76753	1	0.362351	62.3923
GOTERM_BP_FAT	GO:0048545~response to steroid hormone stimulus	5	0.126422	0.0561456	SLC9A3, SPRR2B, FAS, AREG, TAT	328	60	13588	3.45224	1	0.36467	62.8382
GOTERM_BP_FAT	GO:0006979~response to oxidative stress	6	0.151707	0.0586083	GPX2, PTGS2, GATM, DUOX2, CLU, TAT	328	87	13588	2.85702	1	0.376377	64.4647
GOTERM_BP_FAT	GO:0016337~cell-cell adhesion	11	0.278129	0.0594298	ICAM1, ITGAL, PTPRC, BARX2, PLEK, CYFIP2, ITGB2, ITGA4, SELPLG, ITGAM, THY1	328	236	13588	1.93091	1	0.379426	64.9922
GOTERM_BP_FAT	GO:0030593~neutrophil chemotaxis	3	0.0758534	0.0619121	FCER1G, ITGB2, ITGAM	328	17	13588	7.31062	1	0.390855	66.5417
GOTERM_BP_FAT	GO:0045766~positive regulation of angiogenesis	3	0.0758534	0.0619121	GATA4, ITGB2, RUNX1	328	17	13588	7.31062	1	0.390855	66.5417
GOTERM_BP_FAT	GO:0050869~negative regulation of B cell activation	3	0.0758534	0.0619121	CASP3, FAS, INPP5D	328	17	13588	7.31062	1	0.390855	66.5417
GOTERM_BP_FAT	GO:0009395~phospholipid catabolic process	3	0.0758534	0.0619121	SMPDL3B, SMPDL3A, PLA2G4C	328	17	13588	7.31062	1	0.390855	66.5417
GOTERM_BP_FAT	GO:0009620~response to fungus	3	0.0758534	0.0619121	NCF1, TLR2, TGFB1	328	17	13588	7.31062	1	0.390855	66.5417
GOTERM_BP_FAT	GO:0009100~glycoprotein metabolic process	8	0.202276	0.0648013	ST6GAL1, B3GNT5, B3GALT5, B3GNT7, ST8SIA4, CHSY1, FUT2, EXT1	328	147	13588	2.25452	1	0.404023	68.2639
GOTERM_BP_FAT	GO:0016477~cell migration	11	0.278129	0.064992	FMNL1, CORO1A, TNF, FGF15, FYN, FCER1G, ITGB2, ITGA4, SELPLG, TGFB1, ITGAM	328	240	13588	1.89873	1	0.403734	68.3745
GOTERM_BP_FAT	GO:0009612~response to mechanical stimulus	4	0.101138	0.0668399	P2RX7, TNF, FYN, LTB	328	39	13588	4.24891	1	0.411505	69.4284
GOTERM_BP_FAT	GO:0022411~cellular component disassembly	4	0.101138	0.0668399	CASP3, GZMA, PPT1, APAF1	328	39	13588	4.24891	1	0.411505	69.4284
GOTERM_BP_FAT	GO:0006874~cellular calcium ion homeostasis	6	0.151707	0.0683923	PTPRC, P2RX7, LCK, TGM2, TGFB1, F2R	328	91	13588	2.73144	1	0.417723	70.288
GOTERM_BP_FAT	GO:0043413~biopolymer glycosylation	6	0.151707	0.0683923	ST6GAL1, B3GNT5, B3GALT5, B3GNT7, ST8SIA4, FUT2	328	91	13588	2.73144	1	0.417723	70.288
GOTERM_BP_FAT	GO:0006486~protein amino acid glycosylation	6	0.151707	0.0683923	ST6GAL1, B3GNT5, B3GALT5, B3GNT7, ST8SIA4, FUT2	328	91	13588	2.73144	1	0.417723	70.288
GOTERM_BP_FAT	GO:0070085~glycosylation	6	0.151707	0.0683923	ST6GAL1, B3GNT5, B3GALT5, B3GNT7, ST8SIA4, FUT2	328	91	13588	2.73144	1	0.417723	70.288
GOTERM_BP_FAT	GO:0002673~regulation of acute inflammatory response	3	0.0758534	0.068574	C3, FCER1G, SPN	328	18	13588	6.90447	1	0.417351	70.3872
GOTERM_BP_FAT	GO:0002477~antigen processing and presentation of exogenous peptide antigen via MHC class Ib	2	0.0505689	0.0704776	H2-M3, TAP2	328	3	13588	27.6179	1	0.425099	71.4071
GOTERM_BP_FAT	GO:0002481~antigen processing and presentation of exogenous protein antigen via MHC class Ib, TAP-dependent	2	0.0505689	0.0704776	H2-M3, TAP2	328	3	13588	27.6179	1	0.425099	71.4071
GOTERM_BP_FAT	GO:0030334~regulation of cell migration	6	0.151707	0.0709714	CORO1A, TLR2, MYO1F, ARHGAP8, THY1, CXCL10	328	92	13588	2.70175	1	0.426164	71.6662
GOTERM_BP_FAT	GO:0010035~response to inorganic substance	6	0.151707	0.0709714	XDH, P2RX7, CCND1, GATM, HVCN1, TAT	328	92	13588	2.70175	1	0.426164	71.6662
GOTERM_BP_FAT	GO:0045596~negative regulation of cell differentiation	9	0.22756	0.0729827	KLK8, CCND1, ZCCHC11, LMO2, INPP5D, SKIL, CD74, TGFB1, THY1	328	182	13588	2.04858	1	0.434219	72.6988
GOTERM_BP_FAT	GO:0030003~cellular cation homeostasis	8	0.202276	0.074576	PTPRC, P2RX7, SLC30A1, LCK, TGM2, PPT1, TGFB1, F2R	328	152	13588	2.18036	1	0.440229	73.4916
GOTERM_BP_FAT	GO:0031328~positive regulation of cellular biosynthetic process	20	0.505689	0.0750341	IKZF2, TNF, H2-M3, IKZF1, CD3E, TLR1, TLR2, ITGB2, TGFB1, BARX2, ETS1, GATA4, IRF8, IRF1, EAF2, RUNX1, NFATC2, LTB, CD27, SPN	328	552	13588	1.50097	1	0.441046	73.7155
GOTERM_BP_FAT	GO:0030262~apoptotic nuclear changes	3	0.0758534	0.0754588	CASP3, PPT1, APAF1	328	19	13588	6.54108	1	0.441707	73.9215
GOTERM_BP_FAT	GO:0051384~response to glucocorticoid stimulus	3	0.0758534	0.0754588	SLC9A3, FAS, TAT	328	19	13588	6.54108	1	0.441707	73.9215
GOTERM_BP_FAT	GO:0043271~negative regulation of ion transport	3	0.0758534	0.0754588	TNF, LTB, TGFB1	328	19	13588	6.54108	1	0.441707	73.9215
GOTERM_BP_FAT	GO:0045428~regulation of nitric oxide biosynthetic process	3	0.0758534	0.0754588	H2-M3, TLR2, ITGB2	328	19	13588	6.54108	1	0.441707	73.9215
GOTERM_BP_FAT	GO:0006801~superoxide metabolic process	3	0.0758534	0.0754588	NCF1, NOX1, NOS2	328	19	13588	6.54108	1	0.441707	73.9215
GOTERM_BP_FAT	GO:0046425~regulation of JAK-STAT cascade	3	0.0758534	0.0754588	LYN, HCLS1, SOCS1	328	19	13588	6.54108	1	0.441707	73.9215
GOTERM_BP_FAT	GO:0048265~response to pain	3	0.0758534	0.0754588	TAC1, RUNX1, GCH1	328	19	13588	6.54108	1	0.441707	73.9215
GOTERM_BP_FAT	GO:0048535~lymph node development	3	0.0758534	0.0754588	IKZF1, LTB, TGFB1	328	19	13588	6.54108	1	0.441707	73.9215
GOTERM_BP_FAT	GO:0046638~positive regulation of alpha-beta T cell differentiation	3	0.0758534	0.0754588	IKZF1, ZAP70, IL2RG	328	19	13588	6.54108	1	0.441707	73.9215
GOTERM_BP_FAT	GO:0009719~response to endogenous stimulus	9	0.22756	0.0767602	LYN, GATM, HCLS1, SLC9A3, SPRR2B, FAS, AREG, TAT, AKT3	328	184	13588	2.02631	1	0.446266	74.5433
GOTERM_BP_FAT	GO:0033043~regulation of organelle organization	8	0.202276	0.0787165	CORO1A, TNF, PLEK, CAPG, MYO1F, CENPE, LTB, TGFB1	328	154	13588	2.15204	1	0.453632	75.4517
GOTERM_BP_FAT	GO:0055074~calcium ion homeostasis	6	0.151707	0.0790253	PTPRC, P2RX7, LCK, TGM2, TGFB1, F2R	328	95	13588	2.61643	1	0.453726	75.5923
GOTERM_BP_FAT	GO:0043388~positive regulation of DNA binding	4	0.101138	0.079737	TNF, TLR2, ITGB2, TGFB1	328	42	13588	3.94541	1	0.455567	75.9134
GOTERM_BP_FAT	GO:0009891~positive regulation of biosynthetic process	20	0.505689	0.0804743	IKZF2, TNF, H2-M3, IKZF1, CD3E, TLR1, TLR2, ITGB2, TGFB1, BARX2, ETS1, GATA4, IRF8, IRF1, EAF2, RUNX1, NFATC2, LTB, CD27, SPN	328	557	13588	1.4875	1	0.4575	76.2419
GOTERM_BP_FAT	GO:0042269~regulation of natural killer cell mediated cytotoxicity	3	0.0758534	0.082552	H2-M3, SH2D1B1, LAG3	328	20	13588	6.21402	1	0.465115	77.1449
GOTERM_BP_FAT	GO:0002698~negative regulation of immune effector process	3	0.0758534	0.082552	PTPRC, SH2D1B1, SPN	328	20	13588	6.21402	1	0.465115	77.1449
GOTERM_BP_FAT	GO:0002715~regulation of natural killer cell mediated immunity	3	0.0758534	0.082552	H2-M3, SH2D1B1, LAG3	328	20	13588	6.21402	1	0.465115	77.1449
GOTERM_BP_FAT	GO:0043270~positive regulation of ion transport	3	0.0758534	0.082552	AKT3, F2R, THY1	328	20	13588	6.21402	1	0.465115	77.1449
GOTERM_BP_FAT	GO:0022604~regulation of cell morphogenesis	6	0.151707	0.0846556	KLK8, CORO1A, FYN, SEMA4D, FN1, THY1	328	97	13588	2.56248	1	0.472696	78.0263
GOTERM_BP_FAT	GO:0006508~proteolysis	33	0.834387	0.084793	PSMB10, C3, RNF125, USP18, CASP3, CASP4, CFI, C2, SRGN, KLK8, SEC11C, MCPT1, SOCS3, GZMA, SOCS1, UBE2L6, MCPT2, GZMB, NAPSA, PSMB8, CTSW, PSMB9, C1QB, P2RX7, CAPN13, CASP12, TRAF3IP3, PRSS27, UBD, ADAM19, ASB2, RNF19B, APAF1	328	1034	13588	1.32213	1	0.472011	78.0827
GOTERM_BP_FAT	GO:0045926~negative regulation of growth	5	0.126422	0.0915862	IL7, TLR2, PPT1, EAF2, TGFB1	328	71	13588	2.91738	1	0.498333	80.7089
GOTERM_BP_FAT	GO:0032020~ISG15-protein conjugation	2	0.0505689	0.0928519	USP18, UBE2L6	328	4	13588	20.7134	1	0.502047	81.1642
GOTERM_BP_FAT	GO:0046689~response to mercury ion	2	0.0505689	0.0928519	GATM, TAT	328	4	13588	20.7134	1	0.502047	81.1642
GOTERM_BP_FAT	GO:0031579~membrane raft organization	2	0.0505689	0.0928519	DOCK2, PPT1	328	4	13588	20.7134	1	0.502047	81.1642
GOTERM_BP_FAT	GO:0042535~positive regulation of tumor necrosis factor biosynthetic process	2	0.0505689	0.0928519	TLR1, SPN	328	4	13588	20.7134	1	0.502047	81.1642
GOTERM_BP_FAT	GO:0006927~transformed cell apoptosis	2	0.0505689	0.0928519	TNF, FAS	328	4	13588	20.7134	1	0.502047	81.1642
GOTERM_BP_FAT	GO:0051241~negative regulation of multicellular organismal process	6	0.151707	0.0934861	KLK8, P2RX7, SH2D1B1, NCF1, INPP5D, SRGN	328	100	13588	2.48561	1	0.503252	81.3885
GOTERM_BP_FAT	GO:0006875~cellular metal ion homeostasis	6	0.151707	0.0934861	PTPRC, P2RX7, LCK, TGM2, TGFB1, F2R	328	100	13588	2.48561	1	0.503252	81.3885
GOTERM_BP_FAT	GO:0051099~positive regulation of binding	4	0.101138	0.0936219	TNF, TLR2, ITGB2, TGFB1	328	45	13588	3.68238	1	0.502506	81.4362
GOTERM_BP_FAT	GO:0030856~regulation of epithelial cell differentiation	3	0.0758534	0.0973085	XDH, CCND1, DMBT1	328	22	13588	5.64911	1	0.515417	82.6881
GOTERM_BP_FAT	GO:0046637~regulation of alpha-beta T cell differentiation	3	0.0758534	0.0973085	IKZF1, ZAP70, IL2RG	328	22	13588	5.64911	1	0.515417	82.6881
GOTERM_BP_FAT	GO:0050728~negative regulation of inflammatory response	3	0.0758534	0.0973085	GPX2, TNFRSF1B, SPN	328	22	13588	5.64911	1	0.515417	82.6881
GOTERM_BP_FAT	GO:0001974~blood vessel remodeling	3	0.0758534	0.0973085	TGM2, NOS2, ITGA4	328	22	13588	5.64911	1	0.515417	82.6881

## Sheet: GO_Ileum_Down
Table S11: Transcripts that are consistently up- or down-regulated in the ileum or colon in the presence of microbiota and their GO enrichments
Category	Term	Count	%	PValue	Genes	List Total	Pop Hits	Pop Total	Fold Enrichment	Bonferroni	Benjamini	FDR
GOTERM_BP_FAT	GO:0055114~oxidation reduction	107	11.3709	2.58e-27	CYP2C66, CYP2D10, CYP2C65, EHHADH, CYP2C68, PLOD2, SPR, AKR7A5, NQO1, ALDH6A1, CYP2D22, CYP1A1, CYP3A11, QDPR, CYP2E1, CDO1, PPARGC1A, POR, HSD11B2, CYP2D26, HSD17B11, PAM, ME3, CYP2C44, FDX1, HSD17B13, GLUD1, MOSC2, GCLM, IDH1, SCD1, SCD2, CYP2D40, MAOA, AKR1E1, MAOB, CRYZ, CYP4B1, CYP17A1, DHFR, ALDH2, ACAD11, DCXR, CYB5R3, ACOX2, SEPX1, ENOX2, CYP2J9, CYP2S1, CYP2J6, AKR1C12, AKR1C14, AKR1C13,…	680	672	13588	3.18171	6.26e-24	6.26e-24	4.54e-24
GOTERM_BP_FAT	GO:0006631~fatty acid metabolic process	38	4.03826	2.45e-13	ACOX2, PRKAG3, HACL1, PPARA, SLC27A1, EDN2, EHHADH, PRKAG2, ACOT1, LTC4S, ACOT4, ACSL1, FASN, HSD17B4, PRKAA2, ACAA1A, ACAA1B, GHR, SCD1, ACAA2, SCD2, CYP2D22, ACADS, EPHX2, ADIPOR2, CRAT, PHYH, OXSM, ACSM3, BAAT, MLYCD, FAAH, ALOX5, AACS, HPGD, SLC27A2, GPAM, DEGS2	680	184	13588	4.12679	5.93e-10	2.97e-10	4.31e-10
GOTERM_BP_FAT	GO:0008610~lipid biosynthetic process	40	4.2508	9.43e-09	CYB5R3, HSD17B11, PRKAG3, CDIPT, SGMS2, EDN2, HEXB, PRKAG2, LSS, LTC4S, RDH9, ALDH1A1, PIGL, DHCR7, INSIG1, FASN, SRD5A1, SRD5A2, PRKAA2, B4GALT6, PCYT2, PPAP2A, AGPAT3, GAL3ST1, B4GALNT1, DHCR24, SCD1, SCD2, SPHK2, OXSM, PCK1, ACSM3, PCX, CYP17A1, MLYCD, PBX1, MVK, ALOX5, GPAM, DEGS2	680	285	13588	2.80454	2.28e-05	7.62e-06	1.66e-05
GOTERM_BP_FAT	GO:0006732~coenzyme metabolic process	25	2.65675	1.57e-07	COASY, GCLC, EHHADH, BC016495, ACOT1, GGT1, ACSS2, GCLM, PIPOX, ACOT4, GSTK1, GPX4, NUDT7, IDH1, NAPRT1, MOCS2, ACO1, PDK4, GSTT1, SOD1, OXSM, PANK3, BAAT, MLYCD, DCXR	680	143	13588	3.49342	0.000381	9.51e-05	0.000276
GOTERM_BP_FAT	GO:0051186~cofactor metabolic process	28	2.97556	3.61e-07	COASY, GCLC, EHHADH, BC016495, ACOT1, GGT1, ACSS2, GCLM, PIPOX, ACOT4, CBR1, GSTK1, GPX4, NUDT7, IDH1, NAPRT1, MOCS2, ACO1, PDK4, IREB2, GSTT1, SOD1, OXSM, PANK3, BAAT, MLYCD, UROD, DCXR	680	182	13588	3.07421	0.000875	0.000175	0.000635
GOTERM_BP_FAT	GO:0008202~steroid metabolic process	26	2.76302	4.06e-07	CYB5R3, HSD17B11, SLC37A4, LSS, RDH9, SULT1A1, DHCR7, OSBPL1A, INSIG1, APOC3, SRD5A1, SRD5A2, CAT, PRKAA2, DHCR24, SREBF1, CUBN, OSBPL3, OSBPL6, RDH1, EBPL, CYP17A1, BAAT, HSD11B2, MVK, PBX1	680	161	13588	3.22696	0.000983	0.000164	0.000713
GOTERM_BP_FAT	GO:0001523~retinoid metabolic process	11	1.16897	5.25e-07	ALDH1A1, RDH9, RBP4, RDH11, LRAT, DHRS4, ADH1, RBP2, ALDH1A7, RDH1, RETSAT	680	28	13588	7.85021	0.0012718	0.000182	0.000924
GOTERM_BP_FAT	GO:0016101~diterpenoid metabolic process	11	1.16897	5.25e-07	ALDH1A1, RDH9, RBP4, RDH11, LRAT, DHRS4, ADH1, RBP2, ALDH1A7, RDH1, RETSAT	680	28	13588	7.85021	0.0012718	0.000182	0.000924
GOTERM_BP_FAT	GO:0006721~terpenoid metabolic process	11	1.16897	7.66e-07	ALDH1A1, RDH9, RBP4, RDH11, LRAT, DHRS4, ADH1, RBP2, ALDH1A7, RDH1, RETSAT	680	29	13588	7.57951	0.00185422	0.000232	0.00134692
GOTERM_BP_FAT	GO:0006766~vitamin metabolic process	15	1.59405	6.35e-06	RBP4, GCLC, PDXK, BC016495, RDH9, ALDH1A1, RDH11, CBR1, LRAT, DHRS4, ADH1, SLC22A4, ALDH1A7, RETSAT, NAPRT1	680	69	13588	4.34399	0.0152624	0.00170744	0.0111613
GOTERM_BP_FAT	GO:0006575~cellular amino acid derivative metabolic process	22	2.33794	6.7e-06	DDC, ODC1, GCLC, CYP2D22, MAOA, GRIN2A, GSTT1, GGT1, CDO1, SOD1, GCLM, LRAT, CSAD, GSTK1, GPX4, SLC22A4, ABAT, IDH1, GAMT, SPR, PTMS, GHR	680	141	13588	3.11781	0.0160852	0.00162028	0.0117679
GOTERM_BP_FAT	GO:0042445~hormone metabolic process	17	1.80659	8.55e-06	RBP4, RDH9, ALDH1A1, RDH11, CYP17A1, LRAT, CPE, ADH1, AGT, CHST8, HSD11B2, SRD5A1, ALDH1A7, SRD5A2, PCSK5, CACNA1A, RETSAT	680	90	13588	3.77444	0.0204913	0.00188043	0.0150247
GOTERM_BP_FAT	GO:0055085~transmembrane transport	46	4.88842	1.21e-05	SLC16A13, RBP4, GRPEL2, MFSD9, SLC16A10, RHBG, SLC7A8, SFXN3, AQP7, AQP1, SLC47A1, SLC26A11, SLC19A2, AQP3, KCNU1, SLC23A1, SLC2A5, SLC5A4A, SLC22A4, SLC30A4, SLC22A3, SLC25A45, SLC22A1, KCNMA1, SLC2A9, TRPM6, SLC25A4, TCN2, ABCB6, SLC17A5, ATP6V0E2, ABCB1A, SLC7A2, SLC25A10, SLC13A1, SLC13A2, KCNF1, SLC25A37, SLC18A1, KCNH2, CACNA1A, ABCC5, CLCN5, ABCC6, SLC5A12, SLC25A17	680	460	13588	1.99824	0.0288629	0.00243766	0.0212529
GOTERM_BP_FAT	GO:0006873~cellular ion homeostasis	31	3.29437	1.79e-05	GCLC, HEXB, EDN1, SLC37A4, NR3C2, BNIP3, GCLM, DMPK, AQP11, BCL2, WNK4, MT2, MT1, RGN, GAL3ST1, TRPM4, KCNMA1, SCD2, PTGER3, ACO1, IREB2, GRIN2A, SOD1, ATXN1, NAB2, COMMD1, PMP22, KCNH2, CLN5, CACNA1A, ATP7B	680	261	13588	2.37338	0.0423193	0.00332069	0.0313767
GOTERM_BP_FAT	GO:0006720~isoprenoid metabolic process	12	1.27524	2.29e-05	ALDH1A1, RDH9, RBP4, RDH11, LRAT, DHRS4, ADH1, RBP2, MVK, ALDH1A7, RDH1, RETSAT	680	49	13588	4.89364	0.0538837	0.0039486	0.0401905
GOTERM_BP_FAT	GO:0006776~vitamin A metabolic process	9	0.956429	2.61e-05	ALDH1A1, RDH9, RBP4, RDH11, LRAT, DHRS4, ADH1, ALDH1A7, RETSAT	680	26	13588	6.91697	0.0612946	0.00420803	0.0458952
GOTERM_BP_FAT	GO:0055082~cellular chemical homeostasis	31	3.29437	2.97e-05	GCLC, HEXB, EDN1, SLC37A4, NR3C2, BNIP3, GCLM, DMPK, AQP11, BCL2, WNK4, MT2, MT1, RGN, GAL3ST1, TRPM4, KCNMA1, SCD2, PTGER3, ACO1, IREB2, GRIN2A, SOD1, ATXN1, NAB2, COMMD1, PMP22, KCNH2, CLN5, CACNA1A, ATP7B	680	268	13588	2.31139	0.0694245	0.00448691	0.0522049
GOTERM_BP_FAT	GO:0019748~secondary metabolic process	14	1.48778	3.13e-05	RBP4, CYP1A1, RBP2, RDH1, RDH9, ALDH1A1, RDH11, LRAT, DHRS4, ADH1, BCL2, ALDH1A7, DCXR, RETSAT	680	69	13588	4.05439	0.0729657	0.00444683	0.0549704
GOTERM_BP_FAT	GO:0006775~fat-soluble vitamin metabolic process	10	1.0627	3.13e-05	ALDH1A1, RDH9, RBP4, RDH11, CBR1, LRAT, DHRS4, ADH1, ALDH1A7, RETSAT	680	34	13588	5.87716	0.0730231	0.00420373	0.0550154
GOTERM_BP_FAT	GO:0034754~cellular hormone metabolic process	12	1.27524	4.14e-05	ALDH1A1, RDH9, RBP4, RDH11, CYP17A1, LRAT, ADH1, HSD11B2, ALDH1A7, SRD5A1, SRD5A2, RETSAT	680	52	13588	4.61131	0.0953041	0.00525752	0.0726612
GOTERM_BP_FAT	GO:0006790~sulfur metabolic process	16	1.70032	6.07e-05	MOCS2, GCLC, GSTT1, GGT1, CDO1, SOD1, GCLM, CTH, CSAD, GSTK1, GPX4, IDH1, SULT1D1, PAPSS1, CACNA1A, GHR	680	94	13588	3.40125	0.136809	0.00732897	0.106713
GOTERM_BP_FAT	GO:0042572~retinol metabolic process	6	0.63762	6.27e-05	ALDH1A1, RBP4, RDH11, LRAT, ADH1, RETSAT	680	10	13588	11.9894	0.140935	0.00720775	0.110187
GOTERM_BP_FAT	GO:0050801~ion homeostasis	32	3.40064	6.51e-05	GCLC, HEXB, SLC37A4, EDN1, NR3C2, BNIP3, GCLM, DMPK, AQP11, BCL2, WNK4, MT2, SLC30A4, MT1, RGN, GAL3ST1, TRPM4, KCNMA1, SCD2, PTGER3, ACO1, IREB2, GRIN2A, SOD1, ATXN1, NAB2, COMMD1, PMP22, KCNH2, CLN5, CACNA1A, ATP7B	680	293	13588	2.18237	0.145907	0.00714326	0.114395
GOTERM_BP_FAT	GO:0006518~peptide metabolic process	10	1.0627	8.13e-05	PAM, GCLC, GPX4, GSTK1, GSTT1, IDH1, GGT1, SOD1, GCLM, PCSK5	680	38	13588	5.25851	0.178765	0.00852633	0.14283
GOTERM_BP_FAT	GO:0005996~monosaccharide metabolic process	24	2.55048	8.23e-05	PRKAG3, PPARA, PDK2, RBP4, HKDC1, ALDOC, PDK4, FN3K, SLC37A4, FBP1, IGF2, FBP2, PMM1, PCK1, PGM2, GALK1, GALM, PCX, GBE1, PYGL, PGM1, CACNA1A, DCXR, XYLB	680	191	13588	2.51087	0.180783	0.00827416	0.144612
GOTERM_BP_FAT	GO:0042391~regulation of membrane potential	18	1.91286	8.5e-05	TRPM4, KCNMA1, SCD2, GCLC, HEXB, EDN1, GRIN2A, BNIP3, SOD1, GCLM, DMPK, ATXN1, NAB2, BCL2, KCNH2, PMP22, CACNA1A, GAL3ST1	680	119	13588	3.02254	0.186063	0.00820107	0.149298
GOTERM_BP_FAT	GO:0019318~hexose metabolic process	22	2.33794	0.000106	PRKAG3, PPARA, PDK2, RBP4, HKDC1, ALDOC, PDK4, SLC37A4, FBP1, IGF2, FBP2, PMM1, PCK1, PGM2, GALK1, GALM, PCX, GBE1, PYGL, PGM1, CACNA1A, DCXR	680	169	13588	2.60125	0.226015	0.00980555	0.185764
GOTERM_BP_FAT	GO:0006749~glutathione metabolic process	8	0.850159	0.000124	GCLC, GPX4, GSTK1, GSTT1, IDH1, GGT1, SOD1, GCLM	680	24	13588	6.66078	0.258941	0.0110377	0.21725
GOTERM_BP_FAT	GO:0006534~cysteine metabolic process	5	0.53135	0.000192	CTH, GCLC, CSAD, CDO1, GCLM	680	7	13588	14.2731	0.371377	0.0164427	0.336339
GOTERM_BP_FAT	GO:0006006~glucose metabolic process	19	2.01913	0.00021	PRKAG3, PPARA, PDK2, RBP4, HKDC1, ALDOC, PDK4, SLC37A4, FBP1, IGF2, FBP2, PCK1, PGM2, PCX, GBE1, PYGL, PGM1, CACNA1A, DCXR	680	140	13588	2.71189	0.3991	0.0174097	0.368957
GOTERM_BP_FAT	GO:0019725~cellular homeostasis	34	3.61318	0.000236	GCLC, HEXB, SLC37A4, EDN1, NR3C2, BNIP3, TENC1, GCLM, DMPK, AQP11, WNK4, BCL2, MT2, RGN, MT1, GAL3ST1, TRPM4, KCNMA1, SCD2, PTGER3, ACO1, IREB2, GRIN2A, SOD1, PLG, ATXN1, LARGE, NAB2, COMMD1, PMP22, KCNH2, CLN5, CACNA1A, ATP7B	680	343	13588	1.98076	0.435991	0.0189084	0.414758
GOTERM_BP_FAT	GO:0007588~excretion	7	0.743889	0.000433	KCNMA1, PTGER3, AGT, EDN1, NR3C2, GUCA2B, AMN	680	21	13588	6.66078	0.649907	0.0332899	0.758812
GOTERM_BP_FAT	GO:0035150~regulation of tube size	10	1.0627	0.000535	KCNMA1, CALCB, GCLC, KCNJ8, EDN2, AGT, EDN1, ASZ1, SOD1, GCLM	680	48	13588	4.16299	0.726412	0.0396948	0.936247
GOTERM_BP_FAT	GO:0050880~regulation of blood vessel size	10	1.0627	0.000535	KCNMA1, CALCB, GCLC, KCNJ8, EDN2, AGT, EDN1, ASZ1, SOD1, GCLM	680	48	13588	4.16299	0.726412	0.0396948	0.936247
GOTERM_BP_FAT	GO:0019216~regulation of lipid metabolic process	11	1.16897	0.000537	SREBF1, KCNMA1, PPARA, VAV3, THRB, MLYCD, AGT, INSIG1, MLXIPL, SOD1, ANGPTL4	680	58	13588	3.78976	0.728021	0.0386872	0.940486
GOTERM_BP_FAT	GO:0009069~serine family amino acid metabolic process	7	0.743889	0.000571	CTH, GCLC, DHFR, CSAD, CDO1, GCLM, SARDH	680	22	13588	6.35802	0.749121	0.0398542	0.998524
GOTERM_BP_FAT	GO:0009725~response to hormone stimulus	20	2.1254	0.000587	BCKDHA, KCNMA1, SLC27A1, RBP4, GCLC, SNRPN, ACADS, ADIPOR2, ASZ1, RCAN1, TIMP3, ACVR1C, SERPINA1B, ADH1, BCL2, SERPINA1C, SRD5A2, INSR, PIK3R2, GHR	680	165	13588	2.4221	0.758977	0.039838	1.02732
GOTERM_BP_FAT	GO:0010817~regulation of hormone levels	17	1.80659	0.000637	RBP4, RDH9, ALDH1A1, RDH11, CYP17A1, LRAT, CPE, ADH1, AGT, CHST8, HSD11B2, SRD5A1, ALDH1A7, SRD5A2, PCSK5, CACNA1A, RETSAT	680	128	13588	2.65391	0.78641	0.0419741	1.11407
GOTERM_BP_FAT	GO:0006633~fatty acid biosynthetic process	13	1.38151	0.000654	PRKAG3, SCD1, SCD2, EDN2, PRKAG2, LTC4S, OXSM, ACSM3, MLYCD, FASN, PRKAA2, ALOX5, DEGS2	680	81	13588	3.20704	0.794904	0.0419146	1.14319
GOTERM_BP_FAT	GO:0046395~carboxylic acid catabolic process	13	1.38151	0.000654	ACOX2, BCKDHA, HACL1, EHHADH, CDO1, PHYH, FAH, CSAD, GLS, FAAH, HSD17B4, SLC27A2, SARDH	680	81	13588	3.20704	0.794904	0.0419146	1.14319
GOTERM_BP_FAT	GO:0016054~organic acid catabolic process	13	1.38151	0.000654	ACOX2, BCKDHA, HACL1, EHHADH, CDO1, PHYH, FAH, CSAD, GLS, FAAH, HSD17B4, SLC27A2, SARDH	680	81	13588	3.20704	0.794904	0.0419146	1.14319
GOTERM_BP_FAT	GO:0048878~chemical homeostasis	34	3.61318	0.000719	GCLC, HEXB, SLC37A4, EDN1, NR3C2, BNIP3, GCLM, DMPK, AQP11, WNK4, BCL2, MT2, SLC30A4, RGN, MT1, GAL3ST1, TRPM4, KCNMA1, ASPSCR1, SCD2, PTGER3, ACO1, IREB2, MLXIPL, GRIN2A, SOD1, ATXN1, NAB2, COMMD1, PMP22, KCNH2, CLN5, CACNA1A, ATP7B	680	365	13588	1.86137	0.824803	0.0448034	1.25617
GOTERM_BP_FAT	GO:0003018~vascular process in circulatory system	10	1.0627	0.000731	KCNMA1, CALCB, GCLC, KCNJ8, EDN2, AGT, EDN1, ASZ1, SOD1, GCLM	680	50	13588	3.99647	0.829906	0.0444045	1.27735
GOTERM_BP_FAT	GO:0009062~fatty acid catabolic process	7	0.743889	0.00074	ACOX2, HACL1, FAAH, EHHADH, HSD17B4, SLC27A2, PHYH	680	23	13588	6.08159	0.833488	0.0438278	1.2926
GOTERM_BP_FAT	GO:0006694~steroid biosynthetic process	12	1.27524	0.00074	HSD17B11, CYB5R3, CYP17A1, DHCR7, INSIG1, MVK, PBX1, LSS, SRD5A1, PRKAA2, SRD5A2, DHCR24	680	71	13588	3.3773	0.833542	0.0427895	1.29283
GOTERM_BP_FAT	GO:0015698~inorganic anion transport	13	1.38151	0.000818	PTGER3, SLC20A1, 2610029I01RIK, ASZ1, SLC26A11, SLC34A3, TST, ANK, WNK4, SLC13A1, SLC4A2, CLCN5, MPST	680	83	13588	3.12977	0.862084	0.046074	1.42748
GOTERM_BP_FAT	GO:0009719~response to endogenous stimulus	21	2.23167	0.000891	BCKDHA, KCNMA1, SLC27A1, RBP4, GCLC, SNRPN, ACADS, ADIPOR2, GRIN2A, ASZ1, RCAN1, TIMP3, ACVR1C, SERPINA1B, ADH1, BCL2, SERPINA1C, SRD5A2, INSR, PIK3R2, GHR	680	184	13588	2.28059	0.88465	0.0489869	1.55522
GOTERM_BP_FAT	GO:0048511~rhythmic process	14	1.48778	0.00115106	KCNMA1, HLF, ENOX2, SOD1, IMMP2L, CRY2, NR1D1, EREG, DBP, AGT, BCL2, TEF, PER3, ATP7B	680	98	13588	2.85462	0.938547	0.0614295	2.00409
GOTERM_BP_FAT	GO:0009108~coenzyme biosynthetic process	11	1.16897	0.00119183	COASY, PANK3, GCLC, MOCS2, MLYCD, PDK4, BC016495, GGT1, ACSS2, GCLM, NAPRT1	680	64	13588	3.43447	0.944331	0.0621688	2.07437
GOTERM_BP_FAT	GO:0006090~pyruvate metabolic process	7	0.743889	0.00119185	RBP4, PCX, ME3, PDK4, FBP1, FBP2, PCK1	680	25	13588	5.59506	0.944335	0.0608604	2.07441
GOTERM_BP_FAT	GO:0046942~carboxylic acid transport	14	1.48778	0.00126598	SLC27A1, SLC7A15, SLC25A4, PPARG, SLC7A8, SLC6A19, SLC23A1, SLC17A5, SLC6A7, SLC7A2, SLC22A4, SLC36A4, SLC27A2, CACNA1A	680	99	13588	2.82579	0.953493	0.0631947	2.20208
GOTERM_BP_FAT	GO:0042493~response to drug	13	1.38151	0.00138163	MFSD9, GRIN2A, ASZ1, SOD1, SLC47A1, GCLM, ALDH1A1, FOS, ABP1, ABCB1A, BCL2, SRD5A2, SLC18A1	680	88	13588	2.95194	0.964867	0.0673852	2.40094
GOTERM_BP_FAT	GO:0015849~organic acid transport	14	1.48778	0.00139029	SLC27A1, SLC7A15, SLC25A4, PPARG, SLC7A8, SLC6A19, SLC23A1, SLC17A5, SLC6A7, SLC7A2, SLC22A4, SLC36A4, SLC27A2, CACNA1A	680	100	13588	2.79753	0.965598	0.0664569	2.41582
GOTERM_BP_FAT	GO:0051188~cofactor biosynthetic process	13	1.38151	0.00185263	COASY, MOCS2, GCLC, BC016495, PDK4, IREB2, GGT1, ACSS2, GCLM, PANK3, MLYCD, UROD, NAPRT1	680	91	13588	2.85462	0.988793	0.0859086	3.20692
GOTERM_BP_FAT	GO:0019217~regulation of fatty acid metabolic process	6	0.63762	0.00198743	SREBF1, PPARA, MLYCD, AGT, INSIG1, MLXIPL	680	19	13588	6.31022	0.99192	0.0901517	3.43643
GOTERM_BP_FAT	GO:0009636~response to toxin	7	0.743889	0.00269654	DDC, CYP17A1, BCL2, ARNT2, EPHX2, MT2, MT1	680	29	13588	4.82333	0.998555	0.118179	4.63536
GOTERM_BP_FAT	GO:0050873~brown fat cell differentiation	7	0.743889	0.00269654	SCD1, ALDH6A1, LAMB3, NUDT7, PPARG, BNIP3, SELENBP1	680	29	13588	4.82333	0.998555	0.118179	4.63536
GOTERM_BP_FAT	GO:0030003~cellular cation homeostasis	17	1.80659	0.00387008	PTGER3, ACO1, HEXB, EDN1, SLC37A4, NR3C2, IREB2, SOD1, AQP11, BCL2, MT2, MT1, RGN, COMMD1, CLN5, CACNA1A, ATP7B	680	152	13588	2.23487	0.999917	0.162386	6.58872
GOTERM_BP_FAT	GO:0015893~drug transport	5	0.53135	0.00413857	ABP1, MFSD9, ABCB1A, SLC18A1, SLC47A1	680	14	13588	7.13655	0.999957	0.169733	7.03028
GOTERM_BP_FAT	GO:0008272~sulfate transport	5	0.53135	0.00413857	TST, SLC13A1, 2610029I01RIK, SLC26A11, MPST	680	14	13588	7.13655	0.999957	0.169733	7.03028
GOTERM_BP_FAT	GO:0050878~regulation of body fluid levels	12	1.27524	0.00469363	KCNMA1, PTGER3, F3, EDN1, HPS4, PROZ, TFPI, HSD11B2, GUCA2B, TFPI2, PROS1, PLG	680	89	13588	2.69425	0.999989	0.187124	7.93693
GOTERM_BP_FAT	GO:0016125~sterol metabolic process	11	1.16897	0.00483019	SREBF1, CYB5R3, EBPL, CUBN, DHCR7, APOC3, INSIG1, MVK, PRKAA2, CAT, DHCR24	680	77	13588	2.85462	0.999992	0.188939	8.15871
GOTERM_BP_FAT	GO:0000096~sulfur amino acid metabolic process	6	0.63762	0.00487362	CTH, GCLC, CSAD, CDO1, GCLM, CACNA1A	680	23	13588	5.21279	0.999993	0.187462	8.22912
GOTERM_BP_FAT	GO:0010565~regulation of cellular ketone metabolic process	6	0.63762	0.00487362	SREBF1, PPARA, MLYCD, AGT, INSIG1, MLXIPL	680	23	13588	5.21279	0.999993	0.187462	8.22912
GOTERM_BP_FAT	GO:0006695~cholesterol biosynthetic process	6	0.63762	0.00487362	CYB5R3, DHCR7, INSIG1, MVK, PRKAA2, DHCR24	680	23	13588	5.21279	0.999993	0.187462	8.22912
GOTERM_BP_FAT	GO:0055069~zinc ion homeostasis	4	0.42508	0.00575895	SLC30A4, MT2, MT1, ATP7B	680	8	13588	9.99118	0.999999	0.2143	9.6537
GOTERM_BP_FAT	GO:0003014~renal system process	6	0.63762	0.00590739	KCNMA1, PTGER3, AGT, BCL2, EDN1, HSD11B2	680	24	13588	4.99559	0.999999	0.215903	9.89051
GOTERM_BP_FAT	GO:0019395~fatty acid oxidation	6	0.63762	0.00590739	ACOX2, HACL1, EHHADH, ADIPOR2, HSD17B4, PHYH	680	24	13588	4.99559	0.999999	0.215903	9.89051
GOTERM_BP_FAT	GO:0034440~lipid oxidation	6	0.63762	0.00590739	ACOX2, HACL1, EHHADH, ADIPOR2, HSD17B4, PHYH	680	24	13588	4.99559	0.999999	0.215903	9.89051
GOTERM_BP_FAT	GO:0044242~cellular lipid catabolic process	9	0.956429	0.0063368	ACOX2, HACL1, FAAH, EHHADH, HEXB, APOC3, HSD17B4, SLC27A2, PHYH	680	56	13588	3.21145	1	0.22633	10.5723
GOTERM_BP_FAT	GO:0009410~response to xenobiotic stimulus	5	0.53135	0.0069488	GCLC, CYP1A1, ARNT2, AKR1C12, AKR1C13	680	16	13588	6.24449	1	0.241843	11.5355
GOTERM_BP_FAT	GO:0019319~hexose biosynthetic process	6	0.63762	0.00708627	RBP4, PCX, FBP1, FBP2, PMM1, PCK1	680	25	13588	4.79576	1	0.242557	11.7505
GOTERM_BP_FAT	GO:0008203~cholesterol metabolic process	10	1.0627	0.00783227	SREBF1, CYB5R3, CUBN, DHCR7, APOC3, INSIG1, MVK, PRKAA2, CAT, DHCR24	680	70	13588	2.85462	1	0.260878	12.9087
GOTERM_BP_FAT	GO:0051899~membrane depolarization	7	0.743889	0.00822394	ATXN1, GCLC, EDN1, GRIN2A, GCLM, CACNA1A, DMPK	680	36	13588	3.88546	1	0.268393	13.511
GOTERM_BP_FAT	GO:0006800~oxygen and reactive oxygen species metabolic process	8	0.850159	0.00830074	CYP1A1, GPX4, FMO2, BCL2, BNIP3, CCS, CAT, SOD1	680	47	13588	3.40125	1	0.266985	13.6287
GOTERM_BP_FAT	GO:0042304~regulation of fatty acid biosynthetic process	4	0.42508	0.00832017	SREBF1, AGT, INSIG1, MLXIPL	680	9	13588	8.88105	1	0.264057	13.6584
GOTERM_BP_FAT	GO:0051341~regulation of oxidoreductase activity	4	0.42508	0.00832017	ACVR2A, EDN2, ARG2, CCS	680	9	13588	8.88105	1	0.264057	13.6584
GOTERM_BP_FAT	GO:0001501~skeletal system development	25	2.65675	0.00865758	RBP4, THRA, FGFR3, EDN1, FGFRL1, HEXB, PCGF2, OSR2, BCL2, INSIG1, PCSK5, IHH, BMP3, SATB2, BMP2, BMP1, RYK, IGF2, HDAC5, ACVR2A, NAB2, PBX1, BMP8B, PLEKHA1, BMP8A	680	285	13588	1.75284	1	0.26972	14.1734
GOTERM_BP_FAT	GO:0051180~vitamin transport	5	0.53135	0.00873326	RBP4, SLC23A1, SLC22A4, TCN2, SLC19A2	680	17	13588	5.87716	1	0.268329	14.2884
GOTERM_BP_FAT	GO:0006081~cellular aldehyde metabolic process	5	0.53135	0.00873326	RBP4, DHRS4, IDH1, ALDH1A7, ALDH3A2	680	17	13588	5.87716	1	0.268329	14.2884
GOTERM_BP_FAT	GO:0006811~ion transport	51	5.41977	0.00910961	CACHD1, SLC20A1, SLC26A11, ATP2B1, KCNU1, ANK, SLC23A1, WNK4, SLC22A4, SLC22A3, SLC4A2, SLC22A1, TRPM4, KCNMA1, TRPM6, PTGER3, SLC25A4, TMEM38A, GRIN2A, 2610029I01RIK, TCN2, SLC34A3, KCNH6, SLC25A37, KCNH2, MPST, RHBG, SFXN3, ASZ1, KCNJ2, TMEM37, SLC5A4B, SLC5A4A, SLC30A4, CCS, SLC30A2, SCNN1A, KCTD6, TST, ATP6V0E2, KCNJ8, SLC13A1, KCNF1, SLC13A2, SLC5A6, ACCN5, SLC5A11, CACNA1A, CLCN5, SLC5A12, …	680	712	13588	1.43132	1	0.274741	14.8587
GOTERM_BP_FAT	GO:0018904~organic ether metabolic process	8	0.850159	0.0093103	CYP1A1, APOC3, SLC37A4, INSIG1, SLC22A4, CAT, PPAP2A, PCK1	680	48	13588	3.33039	1	0.276493	15.1613
GOTERM_BP_FAT	GO:0003013~circulatory system process	13	1.38151	0.00939491	KCNMA1, GCLC, EDN2, EDN1, ASZ1, EPHX2, SOD1, GCLM, CALCB, KCNJ8, AGT, HSD11B2, GUCA2B	680	111	13588	2.34028	1	0.275302	15.2885
GOTERM_BP_FAT	GO:0008015~blood circulation	13	1.38151	0.00939491	KCNMA1, GCLC, EDN2, EDN1, ASZ1, EPHX2, SOD1, GCLM, CALCB, KCNJ8, AGT, HSD11B2, GUCA2B	680	111	13588	2.34028	1	0.275302	15.2885
GOTERM_BP_FAT	GO:0046165~alcohol biosynthetic process	7	0.743889	0.00941106	RBP4, PCX, SPHK2, FBP1, FBP2, PMM1, PCK1	680	37	13588	3.78045	1	0.272453	15.3128
GOTERM_BP_FAT	GO:0008643~carbohydrate transport	9	0.956429	0.00959172	PRKAG3, SLC2A9, SLC17A5, SLC2A5, SLC5A4A, EDN1, SLC37A4, KLF15, SLC5A11	680	60	13588	2.99735	1	0.273685	15.5839
GOTERM_BP_FAT	GO:0048545~response to steroid hormone stimulus	9	0.956429	0.00959172	BCKDHA, KCNMA1, ADH1, ACADS, BCL2, ASZ1, RCAN1, SRD5A2, TIMP3	680	60	13588	2.99735	1	0.273685	15.5839
GOTERM_BP_FAT	GO:0006812~cation transport	39	4.14453	0.0105192	CACHD1, RHBG, SFXN3, KCNJ2, KCNU1, ATP2B1, TMEM37, SLC23A1, SLC5A4B, SLC5A4A, SLC30A4, SLC22A4, SLC22A3, CCS, SLC30A2, SCNN1A, SLC22A1, TRPM4, KCNMA1, TRPM6, TMEM38A, GRIN2A, TCN2, SLC34A3, KCTD6, ATP6V0E2, KCNJ8, KCNH6, SLC13A1, SLC25A37, KCNF1, SLC13A2, SLC5A6, KCNH2, ACCN5, SLC5A11, CACNA1A, SLC5A12, ATP7B	680	515	13588	1.51323	1	0.292569	16.9627
GOTERM_BP_FAT	GO:0055080~cation homeostasis	18	1.91286	0.0107785	PTGER3, ACO1, HEXB, EDN1, SLC37A4, NR3C2, IREB2, SOD1, AQP11, BCL2, SLC30A4, MT2, MT1, RGN, COMMD1, CLN5, CACNA1A, ATP7B	680	184	13588	1.9548	1	0.295285	17.3443
GOTERM_BP_FAT	GO:0016053~organic acid biosynthetic process	15	1.59405	0.0109252	PRKAG3, SCD1, SCD2, EDN2, PRKAG2, LTC4S, OXSM, ACSM3, CTH, DHFR, MLYCD, FASN, PRKAA2, ALOX5, DEGS2	680	141	13588	2.12578	1	0.295372	17.5596
GOTERM_BP_FAT	GO:0046394~carboxylic acid biosynthetic process	15	1.59405	0.0109252	PRKAG3, SCD1, SCD2, EDN2, PRKAG2, LTC4S, OXSM, ACSM3, CTH, DHFR, MLYCD, FASN, PRKAA2, ALOX5, DEGS2	680	141	13588	2.12578	1	0.295372	17.5596
GOTERM_BP_FAT	GO:0006979~response to oxidative stress	11	1.16897	0.0113044	GCLC, GPX4, BCL2, GAB1, IDH1, CAT, NQO1, SOD1, GCLM, NAPRT1, DHCR24	680	87	13588	2.5265	1	0.300647	18.1133
GOTERM_BP_FAT	GO:0043043~peptide biosynthetic process	4	0.42508	0.0114492	GCLC, GGT1, GCLM, PCSK5	680	10	13588	7.99294	1	0.300622	18.3239
GOTERM_BP_FAT	GO:0031667~response to nutrient levels	13	1.38151	0.0122776	BCKDHA, SREBF1, PPARA, ATG9A, ACADS, CFB, SLC37A4, ADIPOR2, MAP1LC3A, ADH1, BCL2, SLC22A3, ANGPTL4	680	115	13588	2.25887	1	0.315277	19.5187
GOTERM_BP_FAT	GO:0006820~anion transport	14	1.48778	0.0131336	PTGER3, SLC20A1, SLC25A4, 2610029I01RIK, ASZ1, SLC26A11, SLC34A3, TST, ANK, WNK4, SLC13A1, SLC4A2, MPST, CLCN5	680	130	13588	2.15195	1	0.329851	20.7359
GOTERM_BP_FAT	GO:0030001~metal ion transport	34	3.61318	0.0137577	CACHD1, SFXN3, KCNJ2, KCNU1, ATP2B1, TMEM37, SLC23A1, SLC5A4B, SLC5A4A, SLC30A4, SLC22A4, CCS, SCNN1A, TRPM4, KCNMA1, TRPM6, TMEM38A, GRIN2A, TCN2, SLC34A3, KCTD6, KCNJ8, KCNH6, SLC13A1, SLC25A37, KCNF1, SLC13A2, SLC5A6, KCNH2, ACCN5, SLC5A11, CACNA1A, SLC5A12, ATP7B	680	442	13588	1.5371	1	0.33915	21.6124
GOTERM_BP_FAT	GO:0045723~positive regulation of fatty acid biosynthetic process	3	0.31881	0.0139859	SREBF1, AGT, MLXIPL	680	4	13588	14.9868	1	0.340327	21.9305
GOTERM_BP_FAT	GO:0055066~di-, tri-valent inorganic cation homeostasis	15	1.59405	0.0145303	PTGER3, ACO1, EDN1, SLC37A4, HEXB, IREB2, SOD1, BCL2, SLC30A4, MT2, RGN, MT1, COMMD1, CACNA1A, ATP7B	680	146	13588	2.05298	1	0.347612	22.6848
GOTERM_BP_FAT	GO:0060348~bone development	13	1.38151	0.0148517	BMP3, SATB2, BMP2, BMP1, THRA, IGF2, HDAC5, NAB2, BCL2, INSIG1, BMP8B, BMP8A, IHH	680	118	13588	2.20145	1	0.350425	23.1268
GOTERM_BP_FAT	GO:0033865~nucleoside bisphosphate metabolic process	4	0.42508	0.0151659	COASY, PANK3, NUDT7, PAPSS1	680	11	13588	7.26631	1	0.353025	23.5566
GOTERM_BP_FAT	GO:0016126~sterol biosynthetic process	6	0.63762	0.0154834	CYB5R3, DHCR7, INSIG1, MVK, PRKAA2, DHCR24	680	30	13588	3.99647	1	0.355621	23.9887
GOTERM_BP_FAT	GO:0009991~response to extracellular stimulus	14	1.48778	0.0156619	SREBF1, BCKDHA, PPARA, ATG9A, ACADS, CFB, SLC37A4, ADIPOR2, FOS, MAP1LC3A, ADH1, BCL2, SLC22A3, ANGPTL4	680	133	13588	2.10341	1	0.355617	24.2305
GOTERM_BP_FAT	GO:0042558~pteridine and derivative metabolic process	5	0.53135	0.0157898	MOCS2, PCBD1, QDPR, SPR, PIPOX	680	20	13588	4.99559	1	0.354704	24.4034
GOTERM_BP_FAT	GO:0006637~acyl-CoA metabolic process	5	0.53135	0.0157898	BAAT, EHHADH, ACOT1, ACOT4, OXSM	680	20	13588	4.99559	1	0.354704	24.4034
GOTERM_BP_FAT	GO:0006094~gluconeogenesis	5	0.53135	0.0157898	RBP4, PCX, FBP1, FBP2, PCK1	680	20	13588	4.99559	1	0.354704	24.4034
GOTERM_BP_FAT	GO:0010035~response to inorganic substance	11	1.16897	0.0163382	KCNMA1, GCLC, ABCB1A, GPX4, BCL2, D730039F16RIK, MT2, MT1, CAT, SOD1, ATP7B	680	92	13588	2.38919	1	0.361282	25.1404
GOTERM_BP_FAT	GO:0015837~amine transport	11	1.16897	0.0163382	SLC7A15, SLC25A4, SLC6A7, SLC7A2, SLC6A4, SLC7A8, SLC22A4, SLC22A3, SLC36A4, SLC6A19, CACNA1A	680	92	13588	2.38919	1	0.361282	25.1404
GOTERM_BP_FAT	GO:0030005~cellular di-, tri-valent inorganic cation homeostasis	14	1.48778	0.0165821	PTGER3, ACO1, EDN1, SLC37A4, HEXB, IREB2, SOD1, BCL2, MT2, RGN, MT1, COMMD1, CACNA1A, ATP7B	680	134	13588	2.08771	1	0.362361	25.4659
GOTERM_BP_FAT	GO:0001503~ossification	12	1.27524	0.0167337	HDAC5, BMP3, BMP2, SATB2, THRA, BMP1, BCL2, NAB2, IGF2, BMP8B, IHH, BMP8A	680	106	13588	2.26215	1	0.361824	25.6677
GOTERM_BP_FAT	GO:0006839~mitochondrial transport	7	0.743889	0.0172182	PLEKHF1, IMMP2L, GRPEL2, SLC25A10, BCL2, SLC25A37, BNIP3	680	42	13588	3.33039	1	0.366969	26.3089
GOTERM_BP_FAT	GO:0006084~acetyl-CoA metabolic process	6	0.63762	0.0177226	ACO1, MLYCD, PDK4, NUDT7, IDH1, ACSS2	680	31	13588	3.86755	1	0.372297	26.9709
GOTERM_BP_FAT	GO:0046364~monosaccharide biosynthetic process	6	0.63762	0.0177226	RBP4, PCX, FBP1, FBP2, PMM1, PCK1	680	31	13588	3.86755	1	0.372297	26.9709
GOTERM_BP_FAT	GO:0015749~monosaccharide transport	6	0.63762	0.0177226	PRKAG3, SLC2A9, SLC17A5, EDN1, SLC37A4, KLF15	680	31	13588	3.86755	1	0.372297	26.9709
GOTERM_BP_FAT	GO:0030148~sphingolipid biosynthetic process	5	0.53135	0.0187518	SGMS2, SPHK2, B4GALT6, GAL3ST1, B4GALNT1	680	21	13588	4.7577	1	0.385991	28.3042
GOTERM_BP_FAT	GO:0006639~acylglycerol metabolic process	7	0.743889	0.0191914	APOC3, SLC37A4, INSIG1, SLC22A4, CAT, PPAP2A, PCK1	680	43	13588	3.25294	1	0.38984	28.8667
GOTERM_BP_FAT	GO:0006833~water transport	4	0.42508	0.0194822	AQP7, AQP1, SLC14A1, AQP3	680	12	13588	6.66078	1	0.391264	29.2365
GOTERM_BP_FAT	GO:0042044~fluid transport	4	0.42508	0.0194822	AQP7, AQP1, SLC14A1, AQP3	680	12	13588	6.66078	1	0.391264	29.2365
GOTERM_BP_FAT	GO:0043434~response to peptide hormone stimulus	11	1.16897	0.0200626	SLC27A1, RBP4, SERPINA1B, BCL2, SERPINA1C, ASZ1, SRD5A2, INSR, GHR, ACVR1C, PIK3R2	680	95	13588	2.31375	1	0.39712	29.9692
GOTERM_BP_FAT	GO:0034637~cellular carbohydrate biosynthetic process	8	0.850159	0.0208462	PRKAG3, RBP4, PCX, GBE1, FBP1, FBP2, PMM1, PCK1	680	56	13588	2.85462	1	0.405862	30.947
GOTERM_BP_FAT	GO:0046890~regulation of lipid biosynthetic process	5	0.53135	0.0220356	SREBF1, AGT, INSIG1, MLXIPL, SOD1	680	22	13588	4.54144	1	0.420228	32.4066
GOTERM_BP_FAT	GO:0007028~cytoplasm organization	3	0.31881	0.022542	ZMIZ1, SYNJ2BP, TCFCP2L1	680	5	13588	11.9894	1	0.424327	33.0193
GOTERM_BP_FAT	GO:0007050~cell cycle arrest	8	0.850159	0.0227766	GAS2L3, CGREF1, TSG101, GAS2, PMP22, APBB2, SESN1, GADD45A	680	57	13588	2.80454	1	0.424493	33.3013
GOTERM_BP_FAT	GO:0006638~neutral lipid metabolic process	7	0.743889	0.0235881	APOC3, SLC37A4, INSIG1, SLC22A4, CAT, PPAP2A, PCK1	680	45	13588	3.10837	1	0.43267	34.2682
GOTERM_BP_FAT	GO:0006662~glycerol ether metabolic process	7	0.743889	0.0235881	APOC3, SLC37A4, INSIG1, SLC22A4, CAT, PPAP2A, PCK1	680	45	13588	3.10837	1	0.43267	34.2682
GOTERM_BP_FAT	GO:0019228~regulation of action potential in neuron	7	0.743889	0.0235881	KCNMA1, SCD2, NAB2, HEXB, SOD1, PMP22, GAL3ST1	680	45	13588	3.10837	1	0.43267	34.2682
GOTERM_BP_FAT	GO:0015695~organic cation transport	4	0.42508	0.0244039	SLC22A4, RHBG, SLC22A3, SLC22A1	680	13	13588	6.14842	1	0.440642	35.2269
GOTERM_BP_FAT	GO:0007589~body fluid secretion	4	0.42508	0.0244039	KCNMA1, PTGER3, EDN1, GUCA2B	680	13	13588	6.14842	1	0.440642	35.2269
GOTERM_BP_FAT	GO:0006865~amino acid transport	9	0.956429	0.0247954	SLC7A15, SLC25A4, SLC6A7, SLC7A2, SLC7A8, SLC22A4, SLC36A4, SLC6A19, CACNA1A	680	71	13588	2.53297	1	0.442742	35.6822
GOTERM_BP_FAT	GO:0009611~response to wounding	27	2.86929	0.0255711	PPARA, HPS4, PPARG, TLR5, CXCL11, TIMP3, REG3A, SERPINA1B, BCL2, POU2F3, PROZ, TFPI2, BMP2, LIPA, PTGER3, CFB, EPHX2, GRIN2A, SOD1, PLG, SIGIRR, HDAC5, SLC7A2, F3, TFPI, ALOX5, PROS1	680	347	13588	1.55482	1	0.449822	36.5756
GOTERM_BP_FAT	GO:0046467~membrane lipid biosynthetic process	5	0.53135	0.0256486	SGMS2, SPHK2, B4GALT6, GAL3ST1, B4GALNT1	680	23	13588	4.34399	1	0.447716	36.6642
GOTERM_BP_FAT	GO:0007033~vacuole organization	6	0.63762	0.0256881	ATG9A, MAP1LC3A, AKTIP, HPS4, HEXB, CLN5	680	34	13588	3.5263	1	0.445152	36.7093
GOTERM_BP_FAT	GO:0010876~lipid localization	13	1.38151	0.026435	RBP4, SLC27A1, OSBPL3, OSBPL6, PPARG, HEXB, ACVR1C, STARD4, PLEKHA8, OSBPL1A, APOC3, SLC27A2, B4GALNT1	680	128	13588	2.02946	1	0.45163	37.5567
GOTERM_BP_FAT	GO:0030258~lipid modification	7	0.743889	0.0286133	ACOX2, HACL1, EHHADH, ADIPOR2, HSD17B4, PHYH, B4GALNT1	680	47	13588	2.9761	1	0.475372	39.9675
GOTERM_BP_FAT	GO:0044271~nitrogen compound biosynthetic process	24	2.55048	0.0291424	ODC1, DDC, ADSS, MOCS2, SPHK2, PCBD1, ADCY5, BC016495, IREB2, QDPR, ATP2B1, CTH, DHFR, ATP6V0E2, SLC7A2, ARG2, ADK, SPR, DPYD, UROD, GUCA2B, PAPSS1, ATP7B, NAPRT1	680	302	13588	1.588	1	0.478579	40.5397
GOTERM_BP_FAT	GO:0007548~sex differentiation	13	1.38151	0.0293775	RBP4, DMRT3, SOD1, IMMP2L, ACVR2A, EREG, BCL2, AGT, SRD5A1, PBX1, HSD17B4, SRD5A2, DHCR24	680	130	13588	1.99824	1	0.478276	40.7923
GOTERM_BP_FAT	GO:0045834~positive regulation of lipid metabolic process	5	0.53135	0.0295968	SREBF1, VAV3, AGT, MLXIPL, ANGPTL4	680	24	13588	4.16299	1	0.477795	41.027
GOTERM_BP_FAT	GO:0042559~pteridine and derivative biosynthetic process	4	0.42508	0.0299308	MOCS2, PCBD1, QDPR, SPR	680	14	13588	5.70924	1	0.478644	41.3828
GOTERM_BP_FAT	GO:0045444~fat cell differentiation	8	0.850159	0.0317275	SCD1, ALDH6A1, LAMB3, NUDT7, PPARG, BNIP3, SELENBP1, 1100001G20RIK	680	61	13588	2.62064	1	0.495907	43.262
GOTERM_BP_FAT	GO:0033559~unsaturated fatty acid metabolic process	6	0.63762	0.0320932	CYP2D22, EDN2, EPHX2, LTC4S, ALOX5, HPGD	680	36	13588	3.33039	1	0.496914	43.6376
GOTERM_BP_FAT	GO:0006641~triglyceride metabolic process	6	0.63762	0.0320932	APOC3, SLC37A4, INSIG1, SLC22A4, CAT, PCK1	680	36	13588	3.33039	1	0.496914	43.6376
GOTERM_BP_FAT	GO:0034656~nucleobase, nucleoside and nucleotide catabolic process	6	0.63762	0.0320932	NUDT1, NUDT7, CDA, PDE8A, DPYD, NT5C	680	36	13588	3.33039	1	0.496914	43.6376
GOTERM_BP_FAT	GO:0034655~nucleobase, nucleoside, nucleotide and nucleic acid catabolic process	6	0.63762	0.0320932	NUDT1, NUDT7, CDA, PDE8A, DPYD, NT5C	680	36	13588	3.33039	1	0.496914	43.6376
GOTERM_BP_FAT	GO:0019530~taurine metabolic process	3	0.31881	0.0327041	CSAD, CDO1, GHR	680	6	13588	9.99118	1	0.500554	44.2596
GOTERM_BP_FAT	GO:0006729~tetrahydrobiopterin biosynthetic process	3	0.31881	0.0327041	PCBD1, QDPR, SPR	680	6	13588	9.99118	1	0.500554	44.2596
GOTERM_BP_FAT	GO:0009164~nucleoside catabolic process	3	0.31881	0.0327041	NUDT7, CDA, DPYD	680	6	13588	9.99118	1	0.500554	44.2596
GOTERM_BP_FAT	GO:0043288~apocarotenoid metabolic process	3	0.31881	0.0327041	RBP4, DHRS4, ALDH1A7	680	6	13588	9.99118	1	0.500554	44.2596
GOTERM_BP_FAT	GO:0042574~retinal metabolic process	3	0.31881	0.0327041	RBP4, DHRS4, ALDH1A7	680	6	13588	9.99118	1	0.500554	44.2596
GOTERM_BP_FAT	GO:0006085~acetyl-CoA biosynthetic process	3	0.31881	0.0327041	MLYCD, PDK4, ACSS2	680	6	13588	9.99118	1	0.500554	44.2596
GOTERM_BP_FAT	GO:0042552~myelination	6	0.63762	0.0356373	SCD2, NAB2, HEXB, SOD1, PMP22, GAL3ST1	680	37	13588	3.24038	1	0.528195	47.1571
GOTERM_BP_FAT	GO:0007623~circadian rhythm	6	0.63762	0.0356373	KCNMA1, CRY2, NR1D1, DBP, PER3, ATP7B	680	37	13588	3.24038	1	0.528195	47.1571
GOTERM_BP_FAT	GO:0016042~lipid catabolic process	13	1.38151	0.0359599	ACOX2, HACL1, PNLIPRP1, LIPA, PNLIPRP2, EHHADH, HEXB, PHYH, FAAH, APOC3, HSD17B4, SRD5A2, SLC27A2	680	134	13588	1.93859	1	0.528431	47.4669
GOTERM_BP_FAT	GO:0001676~long-chain fatty acid metabolic process	4	0.42508	0.0360578	SLC27A1, EPHX2, ACOT1, SLC27A2	680	15	13588	5.32863	1	0.526422	47.5606
GOTERM_BP_FAT	GO:0046519~sphingoid metabolic process	6	0.63762	0.0394133	SGMS2, SPHK2, HEXB, PPAP2A, GAL3ST1, B4GALNT1	680	38	13588	3.15511	1	0.55585	50.6784
GOTERM_BP_FAT	GO:0051216~cartilage development	9	0.956429	0.040481	BMP3, BMP2, SATB2, THRA, FGFR3, BMP1, EDN1, BMP8B, BMP8A	680	78	13588	2.30566	1	0.562704	51.6331
GOTERM_BP_FAT	GO:0018130~heterocycle biosynthetic process	7	0.743889	0.0406605	MOCS2, PCBD1, ADK, IREB2, QDPR, SPR, UROD	680	51	13588	2.74268	1	0.561362	51.7919
GOTERM_BP_FAT	GO:0001822~kidney development	11	1.16897	0.0412396	ODC1, BMP2, KCNJ8, AQP11, AGT, BCL2, PAX8, ILK, PBX1, PCSK5, TENC1	680	107	13588	2.05426	1	0.563633	52.3009
GOTERM_BP_FAT	GO:0019438~aromatic compound biosynthetic process	4	0.42508	0.0427752	MOCS2, PCBD1, QDPR, SPR	680	16	13588	4.99559	1	0.574245	53.6261
GOTERM_BP_FAT	GO:0009119~ribonucleoside metabolic process	6	0.63762	0.0434237	COASY, PANK3, ADK, NUDT7, CDA, DPYD	680	39	13588	3.07421	1	0.576919	54.1752
GOTERM_BP_FAT	GO:0008366~axon ensheathment	6	0.63762	0.0434237	SCD2, NAB2, HEXB, SOD1, PMP22, GAL3ST1	680	39	13588	3.07421	1	0.576919	54.1752
GOTERM_BP_FAT	GO:0007272~ensheathment of neurons	6	0.63762	0.0434237	SCD2, NAB2, HEXB, SOD1, PMP22, GAL3ST1	680	39	13588	3.07421	1	0.576919	54.1752
GOTERM_BP_FAT	GO:0042311~vasodilation	5	0.53135	0.0434878	KCNMA1, CALCB, KCNJ8, ASZ1, SOD1	680	27	13588	3.70044	1	0.57457	54.2292
GOTERM_BP_FAT	GO:0045923~positive regulation of fatty acid metabolic process	3	0.31881	0.0442908	SREBF1, AGT, MLXIPL	680	7	13588	8.56387	1	0.578503	54.9
GOTERM_BP_FAT	GO:0006817~phosphate transport	3	0.31881	0.0442908	ANK, SLC20A1, SLC34A3	680	7	13588	8.56387	1	0.578503	54.9
GOTERM_BP_FAT	GO:0006882~cellular zinc ion homeostasis	3	0.31881	0.0442908	MT2, MT1, ATP7B	680	7	13588	8.56387	1	0.578503	54.9
GOTERM_BP_FAT	GO:0010033~response to organic substance	35	3.71945	0.0467673	RBP4, SLC27A1, EIF2C2, GCLC, SLC37A4, PPARG, ASZ1, TIMP3, ACVR1C, FOS, SERPINA1B, ADH1, BCL2, SERPINA1C, CREB3L3, SRD5A2, INSR, PIK3R2, GHR, EGR1, KCNMA1, BCKDHA, CYP2D22, SNRPN, CFB, ACADS, GRIN2A, ADIPOR2, RCAN1, SOD1, 1100001G20RIK, HDAC5, KCNJ8, ABAT, ATP7B	680	505	13588	1.38492	1	0.595978	56.9106
GOTERM_BP_FAT	GO:0006814~sodium ion transport	12	1.27524	0.0482452	SLC23A1, SLC5A4B, SLC5A4A, SLC22A4, SLC13A1, SLC13A2, SLC5A6, ACCN5, SCNN1A, SLC34A3, SLC5A11, SLC5A12	680	125	13588	1.91831	1	0.604811	58.0699
GOTERM_BP_FAT	GO:0001658~branching involved in ureteric bud morphogenesis	5	0.53135	0.0488043	BMP2, AGT, BCL2, ILK, PBX1	680	28	13588	3.56828	1	0.606313	58.5008
GOTERM_BP_FAT	GO:0015758~glucose transport	5	0.53135	0.0488043	PRKAG3, SLC2A9, EDN1, SLC37A4, KLF15	680	28	13588	3.56828	1	0.606313	58.5008
GOTERM_BP_FAT	GO:0060675~ureteric bud morphogenesis	5	0.53135	0.0488043	BMP2, AGT, BCL2, ILK, PBX1	680	28	13588	3.56828	1	0.606313	58.5008
GOTERM_BP_FAT	GO:0042573~retinoic acid metabolic process	4	0.42508	0.0500699	ALDH1A1, RDH9, ADH1, ALDH1A7	680	17	13588	4.70173	1	0.613143	59.4607
GOTERM_BP_FAT	GO:0001508~regulation of action potential	7	0.743889	0.0515241	KCNMA1, SCD2, NAB2, HEXB, SOD1, PMP22, GAL3ST1	680	54	13588	2.59031	1	0.62115	60.5378
GOTERM_BP_FAT	GO:0042594~response to starvation	5	0.53135	0.0544624	SREBF1, ATG9A, MAP1LC3A, ACADS, ANGPTL4	680	29	13588	3.44523	1	0.63934	62.6324
GOTERM_BP_FAT	GO:0009110~vitamin biosynthetic process	5	0.53135	0.0544624	ALDH1A1, RDH9, PDXK, BC016495, NAPRT1	680	29	13588	3.44523	1	0.63934	62.6324
GOTERM_BP_FAT	GO:0016051~carbohydrate biosynthetic process	9	0.956429	0.0550307	PRKAG3, RBP4, PCX, GBE1, CHST8, FBP1, FBP2, PMM1, PCK1	680	83	13588	2.16676	1	0.640512	63.0252
GOTERM_BP_FAT	GO:0007167~enzyme linked receptor protein signaling pathway	21	2.23167	0.0559359	FGFR4, BMP2, FGFR3, BEX1, EPHA1, INSRR, ACVR2A, EREG, GAB1, AKAP7, PPM1L, INSR, HPGD, AKAP2, ANGPT2, CACNA1A, BMP8B, PIK3R2, PLEKHA1, BMP8A, GHR	680	273	13588	1.5371	1	0.643952	63.6428
GOTERM_BP_FAT	GO:0044270~nitrogen compound catabolic process	6	0.63762	0.0568745	NUDT1, NUDT7, CDA, PDE8A, DPYD, NT5C	680	42	13588	2.85462	1	0.647538	64.273
GOTERM_BP_FAT	GO:0046146~tetrahydrobiopterin metabolic process	3	0.31881	0.0571348	PCBD1, QDPR, SPR	680	8	13588	7.49338	1	0.646574	64.4459
GOTERM_BP_FAT	GO:0046902~regulation of mitochondrial membrane permeability	3	0.31881	0.0571348	PLEKHF1, BCL2, BNIP3	680	8	13588	7.49338	1	0.646574	64.4459
GOTERM_BP_FAT	GO:0046889~positive regulation of lipid biosynthetic process	3	0.31881	0.0571348	SREBF1, AGT, MLXIPL	680	8	13588	7.49338	1	0.646574	64.4459
GOTERM_BP_FAT	GO:0006750~glutathione biosynthetic process	3	0.31881	0.0571348	GCLC, GGT1, GCLM	680	8	13588	7.49338	1	0.646574	64.4459
GOTERM_BP_FAT	GO:0007292~female gamete generation	7	0.743889	0.0596615	IMMP2L, EREG, AGT, ZMIZ1, BCL2, HEXB, PAQR7	680	56	13588	2.49779	1	0.660282	66.0839
GOTERM_BP_FAT	GO:0040007~growth	16	1.70032	0.0599327	BMP2, TENC1, TIMP3, PLG, ACVR1C, DSG4, EREG, DHCR7, BCL2, ZMIZ1, AKP3, CACNA1A, BMP8B, IHH, PLEKHA1, BMP8A	680	193	13588	1.65657	1	0.65935	66.2555
GOTERM_BP_FAT	GO:0018958~phenol metabolic process	5	0.53135	0.0604592	DDC, CYP2D22, MAOA, GRIN2A, SPR	680	30	13588	3.33039	1	0.66003	66.5862
GOTERM_BP_FAT	GO:0006584~catecholamine metabolic process	5	0.53135	0.0604592	DDC, CYP2D22, MAOA, GRIN2A, SPR	680	30	13588	3.33039	1	0.66003	66.5862
GOTERM_BP_FAT	GO:0034311~diol metabolic process	5	0.53135	0.0604592	DDC, CYP2D22, MAOA, GRIN2A, SPR	680	30	13588	3.33039	1	0.66003	66.5862
GOTERM_BP_FAT	GO:0008645~hexose transport	5	0.53135	0.0604592	PRKAG3, SLC2A9, EDN1, SLC37A4, KLF15	680	30	13588	3.33039	1	0.66003	66.5862
GOTERM_BP_FAT	GO:0009712~catechol metabolic process	5	0.53135	0.0604592	DDC, CYP2D22, MAOA, GRIN2A, SPR	680	30	13588	3.33039	1	0.66003	66.5862
GOTERM_BP_FAT	GO:0015807~L-amino acid transport	4	0.42508	0.0663226	SLC25A4, SLC7A2, SLC7A8, CACNA1A	680	19	13588	4.20681	1	0.692347	70.0679
GOTERM_BP_FAT	GO:0042417~dopamine metabolic process	4	0.42508	0.0663226	CYP2D22, MAOA, GRIN2A, SPR	680	19	13588	4.20681	1	0.692347	70.0679
GOTERM_BP_FAT	GO:0015718~monocarboxylic acid transport	4	0.42508	0.0663226	SLC27A1, SLC17A5, PPARG, SLC27A2	680	19	13588	4.20681	1	0.692347	70.0679
GOTERM_BP_FAT	GO:0009071~serine family amino acid catabolic process	3	0.31881	0.0710819	CSAD, CDO1, SARDH	680	9	13588	6.66078	1	0.715677	72.6394
GOTERM_BP_FAT	GO:0000038~very-long-chain fatty acid metabolic process	3	0.31881	0.0710819	CYP2D22, HSD17B4, SLC27A2	680	9	13588	6.66078	1	0.715677	72.6394
GOTERM_BP_FAT	GO:0006793~phosphorus metabolic process	54	5.73858	0.072747	PINK1, PTPN21, PRKG2, ACVR1C, INSRR, DMPK, MAP3K6, CSNK2A1, WNK4, GAB1, ILK, EEF2K, INSR, TRPM6, SGK2, SGK3, PTPRG, HUNK, ACVR2A, CDKL1, PPM1J, MAPK4, TESK2, MVK, PPM1L, MAP3K13, NEK6, CAMK1D, PRKCZ, FGFR4, FGFR3, NEK3, PPM1A, ASZ1, TRIB3, DUSP12, GALK1, BCL2, DCLK3, PRKAA2, PPAP2A, MTMR7, INPP5A, PDK2, RYK, PDK4, DUSP23, SOD1, EPHA1, AVPI1, RPS6KA5, ATP6V0E2, PLK2, MERTK	680	866	13588	1.24601	1	0.72175	73.4888
GOTERM_BP_FAT	GO:0006796~phosphate metabolic process	54	5.73858	0.072747	PINK1, PTPN21, PRKG2, ACVR1C, INSRR, DMPK, MAP3K6, CSNK2A1, WNK4, GAB1, ILK, EEF2K, INSR, TRPM6, SGK2, SGK3, PTPRG, HUNK, ACVR2A, CDKL1, PPM1J, MAPK4, TESK2, MVK, PPM1L, MAP3K13, NEK6, CAMK1D, PRKCZ, FGFR4, FGFR3, NEK3, PPM1A, ASZ1, TRIB3, DUSP12, GALK1, BCL2, DCLK3, PRKAA2, PPAP2A, MTMR7, INPP5A, PDK2, RYK, PDK4, DUSP23, SOD1, EPHA1, AVPI1, RPS6KA5, ATP6V0E2, PLK2, MERTK	680	866	13588	1.24601	1	0.72175	73.4888
GOTERM_BP_FAT	GO:0043648~dicarboxylic acid metabolic process	4	0.42508	0.0752402	PCX, ME3, ACOT4, GHR	680	20	13588	3.99647	1	0.731697	74.7143
GOTERM_BP_FAT	GO:0042743~hydrogen peroxide metabolic process	4	0.42508	0.0752402	CYP1A1, GPX4, CAT, SOD1	680	20	13588	3.99647	1	0.731697	74.7143
GOTERM_BP_FAT	GO:0045137~development of primary sexual characteristics	10	1.0627	0.0756878	ACVR2A, IMMP2L, RBP4, EREG, AGT, BCL2, SRD5A2, HSD17B4, SOD1, DHCR24	680	104	13588	1.92138	1	0.731432	74.9285
GOTERM_BP_FAT	GO:0051174~regulation of phosphorus metabolic process	22	2.33794	0.0760617	BMP2, FGFR3, VAV3, SPHK2, EDN1, TNFSF15, TRIB3, RCAN1, 2810408A11RIK, SOD1, AVPI1, ATXN1, ACVR2A, EREG, AKTIP, DGKG, BCL2, GAB1, GADD45A, PPP1R14A, PIK3R2, GHR	680	301	13588	1.4605	1	0.730816	75.1062
GOTERM_BP_FAT	GO:0019220~regulation of phosphate metabolic process	22	2.33794	0.0760617	BMP2, FGFR3, VAV3, SPHK2, EDN1, TNFSF15, TRIB3, RCAN1, 2810408A11RIK, SOD1, AVPI1, ATXN1, ACVR2A, EREG, AKTIP, DGKG, BCL2, GAB1, GADD45A, PPP1R14A, PIK3R2, GHR	680	301	13588	1.4605	1	0.730816	75.1062
GOTERM_BP_FAT	GO:0042327~positive regulation of phosphorylation	7	0.743889	0.0781015	ACVR2A, BMP2, FGFR3, EREG, AKTIP, BCL2, GHR	680	60	13588	2.33127	1	0.738114	76.0548
GOTERM_BP_FAT	GO:0015672~monovalent inorganic cation transport	22	2.33794	0.0797823	KCNMA1, TMEM38A, KCNJ2, SLC34A3, KCTD6, KCNU1, SLC23A1, SLC5A4B, ATP6V0E2, KCNJ8, SLC5A4A, SLC13A1, SLC22A4, KCNH6, KCNF1, SLC13A2, SLC5A6, KCNH2, ACCN5, SCNN1A, SLC5A11, SLC5A12	680	303	13588	1.45086	1	0.743508	76.8106
GOTERM_BP_FAT	GO:0040014~regulation of multicellular organism growth	8	0.850159	0.0802634	AGT, BCL2, SPR, GAMT, SOD1, GPAM, GHR, ACVR1C	680	75	13588	2.13145	1	0.743346	77.0228
GOTERM_BP_FAT	GO:0043627~response to estrogen stimulus	5	0.53135	0.080435	KCNMA1, BCL2, ASZ1, RCAN1, TIMP3	680	33	13588	3.02763	1	0.741787	77.098
GOTERM_BP_FAT	GO:0042592~homeostatic process	38	4.03826	0.0808903	GCLC, HEXB, SLC37A4, EDN1, NR3C2, BNIP3, TENC1, GCLM, DMPK, AQP11, WNK4, BCL2, MT2, SLC30A4, RGN, MT1, GAL3ST1, TRPM4, KCNMA1, ASPSCR1, SCD2, LIPA, PTGER3, ACO1, IREB2, GRIN2A, MLXIPL, SOD1, PLG, ATXN1, LARGE, NAB2, COMMD1, PMP22, KCNH2, CACNA1A, CLN5, ATP7B	680	584	13588	1.30022	1	0.741523	77.2966
GOTERM_BP_FAT	GO:0006468~protein amino acid phosphorylation	41	4.35707	0.0839382	PRKCZ, FGFR4, FGFR3, NEK3, ASZ1, PINK1, TRIB3, PRKG2, ACVR1C, INSRR, DMPK, MAP3K6, CSNK2A1, WNK4, BCL2, ILK, GAB1, EEF2K, DCLK3, PRKAA2, INSR, PDK2, TRPM6, SGK2, SGK3, RYK, PDK4, SOD1, EPHA1, AVPI1, RPS6KA5, ACVR2A, HUNK, CDKL1, PLK2, MAPK4, TESK2, MERTK, MAP3K13, NEK6, CAMK1D	680	640	13588	1.28012	1	0.752656	78.5841
GOTERM_BP_FAT	GO:0030308~negative regulation of cell growth	6	0.63762	0.0840144	RTN4, BBC3, BCL2, ADIPOR2, CDA, APBB2	680	47	13588	2.55094	1	0.750716	78.6155
GOTERM_BP_FAT	GO:0042446~hormone biosynthetic process	4	0.42508	0.0846549	CYP17A1, CHST8, SRD5A1, SRD5A2	680	21	13588	3.80616	1	0.751209	78.8768
GOTERM_BP_FAT	GO:0045471~response to ethanol	4	0.42508	0.0846549	ADH1, BCL2, GRIN2A, SOD1	680	21	13588	3.80616	1	0.751209	78.8768
GOTERM_BP_FAT	GO:0016486~peptide hormone processing	3	0.31881	0.08599	CPE, CHST8, PCSK5	680	10	13588	5.99471	1	0.754627	79.4118
GOTERM_BP_FAT	GO:0015936~coenzyme A metabolic process	3	0.31881	0.08599	COASY, PANK3, NUDT7	680	10	13588	5.99471	1	0.754627	79.4118
GOTERM_BP_FAT	GO:0050872~white fat cell differentiation	3	0.31881	0.08599	SCD1, PPARG, 1100001G20RIK	680	10	13588	5.99471	1	0.754627	79.4118
GOTERM_BP_FAT	GO:0006767~water-soluble vitamin metabolic process	5	0.53135	0.0877346	PDXK, GCLC, BC016495, SLC22A4, NAPRT1	680	34	13588	2.93858	1	0.759643	80.0918
GOTERM_BP_FAT	GO:0006690~icosanoid metabolic process	5	0.53135	0.0877346	CYP2D22, EDN2, LTC4S, ALOX5, HPGD	680	34	13588	2.93858	1	0.759643	80.0918
GOTERM_BP_FAT	GO:0010562~positive regulation of phosphorus metabolic process	7	0.743889	0.088397	ACVR2A, BMP2, FGFR3, EREG, AKTIP, BCL2, GHR	680	62	13588	2.25607	1	0.760154	80.3443
GOTERM_BP_FAT	GO:0006665~sphingolipid metabolic process	7	0.743889	0.088397	SGMS2, SPHK2, HEXB, B4GALT6, PPAP2A, GAL3ST1, B4GALNT1	680	62	13588	2.25607	1	0.760154	80.3443
GOTERM_BP_FAT	GO:0045937~positive regulation of phosphate metabolic process	7	0.743889	0.088397	ACVR2A, BMP2, FGFR3, EREG, AKTIP, BCL2, GHR	680	62	13588	2.25607	1	0.760154	80.3443
GOTERM_BP_FAT	GO:0040008~regulation of growth	19	2.01913	0.0898478	RTN4, RBP4, ENOX2, TSG101, ADIPOR2, SOD1, GAS6, TCFCP2L1, ACVR1C, UBE2E3, BBC3, AGT, BCL2, CDA, GAMT, SPR, APBB2, GPAM, GHR	680	256	13588	1.48307	1	0.763814	80.887
GOTERM_BP_FAT	GO:0042398~cellular amino acid derivative biosynthetic process	6	0.63762	0.0901357	DDC, ODC1, GCLC, GGT1, GAMT, GCLM	680	48	13588	2.49779	1	0.762806	80.993
GOTERM_BP_FAT	GO:0007178~transmembrane receptor protein serine/threonine kinase signaling pathway	8	0.850159	0.0943305	ACVR2A, BMP2, PPM1L, AKAP7, AKAP2, HPGD, BMP8B, BMP8A	680	78	13588	2.04947	1	0.776833	82.4758
GOTERM_BP_FAT	GO:0007040~lysosome organization	4	0.42508	0.0945422	AKTIP, HPS4, HEXB, CLN5	680	22	13588	3.63316	1	0.775535	82.5477
GOTERM_BP_FAT	GO:0019218~regulation of steroid metabolic process	4	0.42508	0.0945422	SREBF1, KCNMA1, INSIG1, SOD1	680	22	13588	3.63316	1	0.775535	82.5477
GOTERM_BP_FAT	GO:0046439~L-cysteine metabolic process	2	0.21254	0.0974476	CSAD, CDO1	680	2	13588	19.9824	1	0.784084	83.5062
GOTERM_BP_FAT	GO:0006059~hexitol metabolic process	2	0.21254	0.0974476	GALK1, SORD	680	2	13588	19.9824	1	0.784084	83.5062
GOTERM_BP_FAT	GO:0019452~L-cysteine catabolic process to taurine	2	0.21254	0.0974476	CSAD, CDO1	680	2	13588	19.9824	1	0.784084	83.5062
GOTERM_BP_FAT	GO:0009093~cysteine catabolic process	2	0.21254	0.0974476	CSAD, CDO1	680	2	13588	19.9824	1	0.784084	83.5062
GOTERM_BP_FAT	GO:0007263~nitric oxide mediated signal transduction	2	0.21254	0.0974476	MT2, MT1	680	2	13588	19.9824	1	0.784084	83.5062
GOTERM_BP_FAT	GO:0019448~L-cysteine catabolic process	2	0.21254	0.0974476	CSAD, CDO1	680	2	13588	19.9824	1	0.784084	83.5062
GOTERM_BP_FAT	GO:0006643~membrane lipid metabolic process	7	0.743889	0.099396	SGMS2, SPHK2, HEXB, B4GALT6, PPAP2A, GAL3ST1, B4GALNT1	680	64	13588	2.18557	1	0.788931	84.121

## Sheet: GO_Colon_Up
Table S11: Transcripts that are consistently up- or down-regulated in the ileum or colon in the presence of microbiota and their GO enrichments
Category	Term	Count	%	PValue	Genes	List Total	Pop Hits	Pop Total	Fold Enrichment	Bonferroni	Benjamini	FDR
GOTERM_BP_FAT	GO:0006955~immune response	52	13.6483	6.22e-24	CD8A, VTCN1, IL18, PGLYRP1, TGFB1, CXCL10, TMEM173, OASL2, OASL1, MX2, ANG4, H2-GS10, H2-DMB1, FCAMR, H2-DMB2, GADD45G, OAS1B, H2-AA, OAS1C, GBP3, GBP2, TNF, C3, OAS3, RSAD2, OAS2, CCL5, CD74, TNFRSF1B, CCL20, TAP1, FCER1G, H2-T10, C2, DHX58, PTPRC, IRGM1, H2-M3, SAMHD1, H2-AB1, H2-Q6, VAV1, PSMB8, H2-Q8, PSMB9, DDX58, LAT, TNFSF10, IRF7, H2-EB1, H2-T24, H2-DMA, CD14	269	471	13588	5.57681	1.12e-20	1.12e-20	1.06e-20
GOTERM_BP_FAT	GO:0006952~defense response	40	10.4987	4.25e-15	TNF, FGR, C3, PGLYRP1, RSAD2, ITGB2, CCL5, CD74, TRF, TGFB1, CXCL10, REG3B, TNFRSF1B, TMEM173, CCL20, TAP1, FCER1G, NOS2, REG3G, C2, MX2, DHX58, PTPRC, NFKBIZ, IRGM1, LYZ2, PNLIPRP2, H2-M3, ANG4, SAMHD1, COTL1, H2-Q6, H2-Q8, DDX58, LAT, P2RX7, HIF1A, H2-AA, APAF1, CD14, IGFBP4	269	448	13588	4.51009	7.59e-12	3.8e-12	7.16e-12
GOTERM_BP_FAT	GO:0019886~antigen processing and presentation of exogenous peptide antigen via MHC class II	10	2.62467	4.01e-12	H2-EB1, CTSE, UNC93B1, H2-AA, FCER1G, H2-DMB1, H2-AB1, H2-DMA, CD74, H2-DMB2	269	16	13588	31.5706	7.21e-09	2.4e-09	6.8e-09
GOTERM_BP_FAT	GO:0002495~antigen processing and presentation of peptide antigen via MHC class II	10	2.62467	4.01e-12	H2-EB1, CTSE, UNC93B1, H2-AA, FCER1G, H2-DMB1, H2-AB1, H2-DMA, CD74, H2-DMB2	269	16	13588	31.5706	7.21e-09	2.4e-09	6.8e-09
GOTERM_BP_FAT	GO:0002478~antigen processing and presentation of exogenous peptide antigen	11	2.88714	6.88e-12	H2-M3, H2-EB1, CTSE, UNC93B1, H2-AA, FCER1G, H2-DMB1, H2-AB1, H2-DMA, CD74, H2-DMB2	269	23	13588	24.1584	1.24e-08	3.1e-09	1.17e-08
GOTERM_BP_FAT	GO:0019882~antigen processing and presentation	17	4.46194	1.14e-11	H2-M3, H2-GS10, UNC93B1, H2-DMB1, H2-AB1, H2-Q6, H2-DMB2, H2-Q8, CD74, PSMB8, PSMB9, H2-EB1, CTSE, FCER1G, H2-AA, H2-T10, H2-T24, H2-DMA	269	87	13588	9.87036	2.04e-08	4.09e-09	1.93e-08
GOTERM_BP_FAT	GO:0002504~antigen processing and presentation of peptide or polysaccharide antigen via MHC class II	10	2.62467	3.07e-11	H2-EB1, CTSE, UNC93B1, H2-AA, FCER1G, H2-DMB1, H2-AB1, H2-DMA, CD74, H2-DMB2	269	19	13588	26.5858	5.53e-08	9.22e-09	5.22e-08
GOTERM_BP_FAT	GO:0048002~antigen processing and presentation of peptide antigen	12	3.14961	3.93e-11	H2-M3, UNC93B1, H2-DMB1, H2-AB1, H2-Q6, H2-DMB2, H2-Q8, CD74, H2-EB1, CTSE, FCER1G, H2-AA, H2-DMA	269	35	13588	17.3187	7.07e-08	1.01e-08	6.67e-08
GOTERM_BP_FAT	GO:0019884~antigen processing and presentation of exogenous antigen	11	2.88714	7.23e-11	H2-M3, H2-EB1, CTSE, UNC93B1, H2-AA, FCER1G, H2-DMB1, H2-AB1, H2-DMA, CD74, H2-DMB2	269	28	13588	19.8444	1.3e-07	1.63e-08	1.23e-07
GOTERM_BP_FAT	GO:0042110~T cell activation	18	4.72441	1.11e-10	PTPRC, H2-M3, CD8A, CD3E, ITGB2, VAV1, FKBP1B, TGFB1, CD74, ITGAM, HSH2D, CD48, CARD11, P2RX7, CXCR4, GADD45G, IRF1, H2-DMA	269	116	13588	7.83823	2e-07	2.22e-08	1.89e-07
GOTERM_BP_FAT	GO:0001775~cell activation	23	6.03675	3.41e-09	PTPRC, TNF, PLEK, H2-M3, CD8A, CD3E, ITGB2, VAV1, FKBP1B, TGFB1, ITGAM, CD74, HSH2D, CD48, CARD11, LAT, VWF, P2RX7, CXCR4, GADD45G, IRF1, FCER1G, H2-DMA	269	246	13588	4.72276	6.14e-06	6.14e-07	5.8e-06
GOTERM_BP_FAT	GO:0050865~regulation of cell activation	18	4.72441	1.17e-08	PTPRC, PLEK, CD3E, VTCN1, IL18, CD276, CD74, TGFB1, TIGIT, CARD11, LAT, CORO1A, CD274, CD81, FCER1G, H2-AA, H2-DMA, SASH3	269	156	13588	5.82842	2.11e-05	1.92e-06	1.99e-05
GOTERM_BP_FAT	GO:0002684~positive regulation of immune system process	20	5.24934	2.52e-08	PTPRC, LYN, H2-M3, C3, CD3E, IL18, UNC93B1, H2-Q6, H2-Q8, CD74, TGFB1, CARD11, CORO1A, CD37, P2RX7, CD81, FCER1G, H2-AA, C2, H2-DMA, SASH3	269	206	13588	4.90418	4.54e-05	3.79e-06	4.29e-05
GOTERM_BP_FAT	GO:0050863~regulation of T cell activation	15	3.93701	2.57e-08	PTPRC, CD3E, VTCN1, IL18, CD276, CD74, TGFB1, TIGIT, CARD11, LAT, CORO1A, CD274, H2-AA, H2-DMA, SASH3	269	108	13588	7.0157	4.62e-05	3.55e-06	4.36e-05
GOTERM_BP_FAT	GO:0002694~regulation of leukocyte activation	17	4.46194	6.28e-08	PTPRC, CD3E, VTCN1, IL18, CD276, CD74, TGFB1, TIGIT, CARD11, LAT, CORO1A, CD274, CD81, FCER1G, H2-AA, H2-DMA, SASH3	269	154	13588	5.57611	0.000113	8.07e-06	0.000107
GOTERM_BP_FAT	GO:0045321~leukocyte activation	20	5.24934	6.75e-08	PTPRC, H2-M3, CD8A, CD3E, ITGB2, VAV1, FKBP1B, TGFB1, CD74, ITGAM, HSH2D, CD48, CARD11, LAT, P2RX7, CXCR4, GADD45G, IRF1, FCER1G, H2-DMA	269	219	13588	4.61306	0.000122	8.1e-06	0.000115
GOTERM_BP_FAT	GO:0051249~regulation of lymphocyte activation	16	4.19948	1.58e-07	PTPRC, CD3E, VTCN1, IL18, CD276, CD74, TGFB1, TIGIT, CARD11, LAT, CORO1A, CD274, CD81, H2-AA, H2-DMA, SASH3	269	144	13588	5.61256	0.000284	1.78e-05	0.000268
GOTERM_BP_FAT	GO:0046649~lymphocyte activation	18	4.72441	2.34e-07	PTPRC, H2-M3, CD8A, CD3E, ITGB2, VAV1, FKBP1B, TGFB1, CD74, ITGAM, HSH2D, CD48, CARD11, P2RX7, CXCR4, GADD45G, IRF1, H2-DMA	269	191	13588	4.76039	0.000421	2.48e-05	0.000398
GOTERM_BP_FAT	GO:0001819~positive regulation of cytokine production	11	2.88714	3.28e-07	DDX58, TIGIT, P2RX7, TNF, H2-M3, CD3E, IL18, FCER1G, H2-Q6, H2-Q8, SASH3, CD14	269	62	13588	8.96199	0.000591	3.28e-05	0.000558
GOTERM_BP_FAT	GO:0006954~inflammatory response	19	4.98688	5.08e-07	NFKBIZ, TNF, C3, ITGB2, CCL5, TGFB1, TRF, CXCL10, REG3B, LAT, TNFRSF1B, P2RX7, HIF1A, CCL20, C2, NOS2, REG3G, CD14, IGFBP4	269	225	13588	4.26554	0.000913	4.81e-05	0.000862
GOTERM_BP_FAT	GO:0001817~regulation of cytokine production	15	3.93701	6.24e-07	TNF, H2-M3, CD3E, IL18, CD276, H2-Q6, H2-Q8, TIGIT, DDX58, CARD11, P2RX7, IRF1, FCER1G, CD14, SASH3, SRGN	269	139	13588	5.45104	0.00112214	5.61e-05	0.00105925
GOTERM_BP_FAT	GO:0050867~positive regulation of cell activation	13	3.41207	6.8e-07	PTPRC, PLEK, CD3E, IL18, CD74, TGFB1, CARD11, CORO1A, CD81, H2-AA, FCER1G, H2-DMA, SASH3	269	101	13588	6.50167	0.00122262	5.83e-05	0.00115415
GOTERM_BP_FAT	GO:0009611~response to wounding	23	6.03675	1.48e-06	NFKBIZ, TNF, PLEK, GATM, C3, ITGB2, CCL5, TGFB1, TRF, CXCL10, REG3B, LAT, VWF, TNFRSF1B, P2RX7, HIF1A, CCL20, CD81, C2, NOS2, REG3G, CD14, IGFBP4	269	347	13588	3.34812	0.00266674	0.000121	0.0025192
GOTERM_BP_FAT	GO:0042330~taxis	13	3.41207	1.55e-06	ITGB2, CCL5, ITGAM, CXCL10, CORO1A, CCL20, RAC2, CXCL16, ECSCR, CCR10, CMTM7, FCER1G, ROBO2	269	109	13588	6.02449	0.00279241	0.000122	0.00263808
GOTERM_BP_FAT	GO:0006935~chemotaxis	13	3.41207	1.55e-06	ITGB2, CCL5, ITGAM, CXCL10, CORO1A, CCL20, RAC2, CXCL16, ECSCR, CCR10, CMTM7, FCER1G, ROBO2	269	109	13588	6.02449	0.00279241	0.000122	0.00263808
GOTERM_BP_FAT	GO:0002696~positive regulation of leukocyte activation	12	3.14961	3.89e-06	CARD11, PTPRC, CORO1A, CD3E, IL18, CD81, H2-AA, FCER1G, H2-DMA, CD74, SASH3, TGFB1	269	99	13588	6.12279	0.00697383	0.000292	0.00660211
GOTERM_BP_FAT	GO:0002252~immune effector process	13	3.41207	7.17e-06	PTPRC, CD8A, C3, SAMHD1, RSAD2, H2-Q6, H2-Q8, CD74, LAT, IRF7, H2-AA, FCER1G, C2, H2-DMA	269	126	13588	5.21166	0.0128287	0.000516	0.0121805
GOTERM_BP_FAT	GO:0006979~response to oxidative stress	11	2.88714	7.92e-06	GPX2, PYCR1, LPO, PXDN, HIF1A, GATM, PRDX6, APOE, DUOX2, CLU, MMP14	269	87	13588	6.3867	0.0141599	0.000548	0.0134534
GOTERM_BP_FAT	GO:0042127~regulation of cell proliferation	28	7.34908	8.21e-06	TNF, IL18, IFITM3, CLU, HOXD13, TGFB1, SLFN2, CXCL10, RAC2, PTGES, PLCD3, GRPR, NOS2, ETV4, PTPRC, LYN, CD3E, CRIP2, CD276, IRS1, CARD11, CORO1A, LAMA5, CD274, NOTCH4, CD81, PLA2G2A, SASH3	269	538	13588	2.62893	0.0146737	0.000547	0.0139452
GOTERM_BP_FAT	GO:0002697~regulation of immune effector process	11	2.88714	8.79e-06	DDX58, PTPRC, P2RX7, CD37, TNF, H2-M3, C3, FCER1G, H2-Q6, H2-Q8, SASH3, TGFB1	269	88	13588	6.31413	0.0156892	0.000565	0.0149178
GOTERM_BP_FAT	GO:0050778~positive regulation of immune response	13	3.41207	1.57e-05	PTPRC, H2-M3, LYN, CD3E, C3, UNC93B1, H2-Q6, H2-Q8, P2RX7, FCER1G, H2-AA, C2, H2-DMA, SASH3	269	136	13588	4.82845	0.0278547	0.000974	0.0266482
GOTERM_BP_FAT	GO:0051251~positive regulation of lymphocyte activation	11	2.88714	1.59e-05	CARD11, PTPRC, CORO1A, CD3E, IL18, CD81, H2-AA, H2-DMA, CD74, SASH3, TGFB1	269	94	13588	5.9111	0.0281511	0.000951	0.0269358
GOTERM_BP_FAT	GO:0030217~T cell differentiation	10	2.62467	1.77e-05	CARD11, PTPRC, CD8A, CD3E, GADD45G, IRF1, H2-DMA, VAV1, CD74, TGFB1	269	76	13588	6.64645	0.0314249	0.00102945	0.0301183
GOTERM_BP_FAT	GO:0042129~regulation of T cell proliferation	9	2.3622	1.91e-05	CARD11, PTPRC, CORO1A, CD3E, IL18, CD274, CD276, SASH3, TGFB1	269	59	13588	7.70537	0.0338812	0.00107656	0.0325132
GOTERM_BP_FAT	GO:0050670~regulation of lymphocyte proliferation	10	2.62467	2.7e-05	CARD11, PTPRC, CORO1A, CD3E, IL18, CD274, CD81, CD276, SASH3, TGFB1	269	80	13588	6.31413	0.0473665	0.00146937	0.0457692
GOTERM_BP_FAT	GO:0032944~regulation of mononuclear cell proliferation	10	2.62467	2.7e-05	CARD11, PTPRC, CORO1A, CD3E, IL18, CD274, CD81, CD276, SASH3, TGFB1	269	80	13588	6.31413	0.0473665	0.00146937	0.0457692
GOTERM_BP_FAT	GO:0002699~positive regulation of immune effector process	8	2.09974	2.98e-05	PTPRC, P2RX7, CD37, H2-M3, C3, FCER1G, H2-Q6, H2-Q8, SASH3	269	46	13588	8.78487	0.0521705	0.00157466	0.0505365
GOTERM_BP_FAT	GO:0070663~regulation of leukocyte proliferation	10	2.62467	3.29e-05	CARD11, PTPRC, CORO1A, CD3E, IL18, CD274, CD81, CD276, SASH3, TGFB1	269	82	13588	6.16012	0.0575317	0.00169151	0.0558852
GOTERM_BP_FAT	GO:0002250~adaptive immune response	10	2.62467	4e-05	CD8A, C3, IL18, IRF7, GADD45G, H2-AA, FCER1G, C2, H2-DMA, CD74	269	84	13588	6.01345	0.0693995	0.00199593	0.067833
GOTERM_BP_FAT	GO:0002460~adaptive immune response based on somatic recombination of immune receptors built from immunoglobulin superfamily domains	10	2.62467	4e-05	CD8A, C3, IL18, IRF7, GADD45G, H2-AA, FCER1G, C2, H2-DMA, CD74	269	84	13588	6.01345	0.0693995	0.00199593	0.067833
GOTERM_BP_FAT	GO:0050870~positive regulation of T cell activation	9	2.3622	4.4e-05	CARD11, PTPRC, CORO1A, CD3E, IL18, H2-AA, H2-DMA, CD74, SASH3	269	66	13588	6.88814	0.0761995	0.00213985	0.0747471
GOTERM_BP_FAT	GO:0002821~positive regulation of adaptive immune response	7	1.83727	4.71e-05	PTPRC, P2RX7, H2-M3, C3, FCER1G, H2-Q6, H2-Q8, SASH3	269	34	13588	10.3997	0.0812201	0.00222669	0.0798844
GOTERM_BP_FAT	GO:0002824~positive regulation of adaptive immune response based on somatic recombination of immune receptors built from immunoglobulin superfamily domains	7	1.83727	4.71e-05	PTPRC, P2RX7, H2-M3, C3, FCER1G, H2-Q6, H2-Q8, SASH3	269	34	13588	10.3997	0.0812201	0.00222669	0.0798844
GOTERM_BP_FAT	GO:0051085~chaperone mediated protein folding requiring cofactor	5	1.31234	6.47e-05	TOR3A, H2-DMB1, H2-DMA, CD74, H2-DMB2	269	12	13588	21.0471	0.10987	0.00297986	0.109743
GOTERM_BP_FAT	GO:0016042~lipid catabolic process	12	3.14961	6.9e-05	PNLIPRP2, SMPDL3B, PRDX6, APOE, ACAP1, PLA2G2A, PLCD3, PLA2G4F, PLA2G4C, PLA2G3, PLA2G5, PLA2G2F	269	134	13588	4.52355	0.116864	0.00310208	0.117176
GOTERM_BP_FAT	GO:0048584~positive regulation of response to stimulus	14	3.67454	8.2e-05	PTPRC, TNF, H2-M3, LYN, C3, CD3E, UNC93B1, H2-Q6, H2-Q8, P2RX7, FCER1G, H2-AA, C2, H2-DMA, SASH3	269	186	13588	3.80205	0.137241	0.00359401	0.139171
GOTERM_BP_FAT	GO:0002711~positive regulation of T cell mediated immunity	5	1.31234	9.19e-05	PTPRC, P2RX7, H2-M3, H2-Q6, H2-Q8, SASH3	269	13	13588	19.4281	0.152545	0.00393313	0.156031
GOTERM_BP_FAT	GO:0051240~positive regulation of multicellular organismal process	13	3.41207	9.38e-05	TNF, H2-M3, CD3E, IL18, CD276, H2-Q6, TRF, H2-Q8, TIGIT, DDX58, P2RX7, FCER1G, SASH3, CD14	269	163	13588	4.02865	0.155326	0.003918	0.159128
GOTERM_BP_FAT	GO:0002819~regulation of adaptive immune response	8	2.09974	0.000109	PTPRC, P2RX7, H2-M3, C3, FCER1G, H2-Q6, H2-Q8, SASH3, TGFB1	269	56	13588	7.21614	0.178221	0.00445105	0.185007
GOTERM_BP_FAT	GO:0002822~regulation of adaptive immune response based on somatic recombination of immune receptors built from immunoglobulin superfamily domains	8	2.09974	0.000109	PTPRC, P2RX7, H2-M3, C3, FCER1G, H2-Q6, H2-Q8, SASH3, TGFB1	269	56	13588	7.21614	0.178221	0.00445105	0.185007
GOTERM_BP_FAT	GO:0002705~positive regulation of leukocyte mediated immunity	7	1.83727	0.000122	PTPRC, P2RX7, H2-M3, C3, FCER1G, H2-Q6, H2-Q8, SASH3	269	40	13588	8.83978	0.196645	0.00485393	0.206358
GOTERM_BP_FAT	GO:0002708~positive regulation of lymphocyte mediated immunity	7	1.83727	0.000122	PTPRC, P2RX7, H2-M3, C3, FCER1G, H2-Q6, H2-Q8, SASH3	269	40	13588	8.83978	0.196645	0.00485393	0.206358
GOTERM_BP_FAT	GO:0009615~response to virus	9	2.3622	0.000122	DDX58, PTPRC, IFI27L2A, IRF7, OAS1B, SAMHD1, RSAD2, H2-Q6, MX2, H2-Q8	269	76	13588	5.9818	0.197145	0.00476212	0.206943
GOTERM_BP_FAT	GO:0051084~'de novo' posttranslational protein folding	5	1.31234	0.000127	TOR3A, H2-DMB1, H2-DMA, CD74, H2-DMB2	269	14	13588	18.0404	0.203991	0.00484238	0.215006
GOTERM_BP_FAT	GO:0006458~'de novo' protein folding	5	1.31234	0.000127	TOR3A, H2-DMB1, H2-DMA, CD74, H2-DMB2	269	14	13588	18.0404	0.203991	0.00484238	0.215006
GOTERM_BP_FAT	GO:0030097~hemopoiesis	16	4.19948	0.000139	PTPRC, TNF, CD8A, LYN, CD3E, CRIP2, VAV1, CD74, TGFB1, CARD11, HIF1A, GADD45G, IRF1, SPNA1, H2-DMA, THPO	269	251	13588	3.21995	0.221997	0.00521603	0.236543
GOTERM_BP_FAT	GO:0032844~regulation of homeostatic process	8	2.09974	0.00017	PTPRC, P2RX7, HIF1A, ETS1, FCER1G, FKBP1B, TGFB1, TRF	269	60	13588	6.73507	0.263378	0.00621895	0.287971
GOTERM_BP_FAT	GO:0045061~thymic T cell selection	5	1.31234	0.00017	CARD11, PTPRC, CD3E, H2-DMA, CD74	269	15	13588	16.8377	0.263838	0.00610738	0.288559
GOTERM_BP_FAT	GO:0070661~leukocyte proliferation	7	1.83727	0.000184	PTPRC, P2RX7, CXCR4, ITGB2, FKBP1B, TGFB1, ITGAM	269	43	13588	8.22305	0.281789	0.00646903	0.311779
GOTERM_BP_FAT	GO:0032943~mononuclear cell proliferation	7	1.83727	0.000184	PTPRC, P2RX7, CXCR4, ITGB2, FKBP1B, TGFB1, ITGAM	269	43	13588	8.22305	0.281789	0.00646903	0.311779
GOTERM_BP_FAT	GO:0042098~T cell proliferation	6	1.5748	0.000195	PTPRC, P2RX7, CXCR4, ITGB2, FKBP1B, ITGAM	269	28	13588	10.8242	0.295822	0.00672199	0.330335
GOTERM_BP_FAT	GO:0002700~regulation of production of molecular mediator of immune response	6	1.5748	0.000274	PTPRC, CD37, TNF, FCER1G, SASH3, TGFB1	269	30	13588	10.1026	0.388873	0.00924849	0.463513
GOTERM_BP_FAT	GO:0002706~regulation of lymphocyte mediated immunity	8	2.09974	0.000282	PTPRC, P2RX7, H2-M3, C3, FCER1G, H2-Q6, H2-Q8, SASH3, TGFB1	269	65	13588	6.21699	0.397587	0.00934149	0.476997
GOTERM_BP_FAT	GO:0009617~response to bacterium	12	3.14961	0.000282	GPX2, P2RX7, LYZ2, TNF, H2-M3, FGR, ANG4, PGLYRP1, FCER1G, NOS2, STAT1, CD14	269	157	13588	3.86087	0.398175	0.00919002	0.477914
GOTERM_BP_FAT	GO:0007626~locomotory behavior	15	3.93701	0.000285	ITGB2, NPY1R, CELSR1, CCL5, ITGAM, CXCL10, CORO1A, CCL20, RAC2, CXCL16, ECSCR, CCR10, FCER1G, CMTM7, ROBO2	269	239	13588	3.17027	0.400973	0.00910912	0.48229
GOTERM_BP_FAT	GO:0032729~positive regulation of interferon-gamma production	5	1.31234	0.000288	H2-M3, CD3E, IL18, H2-Q6, H2-Q8, SASH3	269	17	13588	14.8568	0.404133	0.009042	0.487256
GOTERM_BP_FAT	GO:0051094~positive regulation of developmental process	14	3.67454	0.00033	PTPRC, TNF, CLU, CD276, ITGB2, CD74, P2RX7, HIF1A, ETS1, H2-AA, ROBO2, SEMA4D, H2-DMA, SASH3	269	214	13588	3.30459	0.447842	0.0101878	0.558753
GOTERM_BP_FAT	GO:0002709~regulation of T cell mediated immunity	5	1.31234	0.000364	PTPRC, P2RX7, H2-M3, H2-Q6, H2-Q8, SASH3	269	18	13588	14.0314	0.480777	0.0110474	0.616433
GOTERM_BP_FAT	GO:0002443~leukocyte mediated immunity	9	2.3622	0.000367	LAT, CD8A, C3, IRF7, H2-AA, FCER1G, C2, H2-DMA, CD74	269	89	13588	5.10806	0.483136	0.0109393	0.620703
GOTERM_BP_FAT	GO:0032649~regulation of interferon-gamma production	6	1.5748	0.000374	H2-M3, CD3E, IL18, CD276, H2-Q6, H2-Q8, SASH3	269	32	13588	9.47119	0.490275	0.0109865	0.633742
GOTERM_BP_FAT	GO:0030098~lymphocyte differentiation	10	2.62467	0.000421	CARD11, PTPRC, CD8A, CD3E, GADD45G, IRF1, H2-DMA, VAV1, CD74, TGFB1	269	114	13588	4.43097	0.531503	0.012155	0.712776
GOTERM_BP_FAT	GO:0050671~positive regulation of lymphocyte proliferation	7	1.83727	0.000427	CARD11, PTPRC, CORO1A, CD3E, IL18, CD81, SASH3	269	50	13588	7.07182	0.53649	0.012131	0.7228
GOTERM_BP_FAT	GO:0032946~positive regulation of mononuclear cell proliferation	7	1.83727	0.000427	CARD11, PTPRC, CORO1A, CD3E, IL18, CD81, SASH3	269	50	13588	7.07182	0.53649	0.012131	0.7228
GOTERM_BP_FAT	GO:0002703~regulation of leukocyte mediated immunity	8	2.09974	0.000446	PTPRC, P2RX7, H2-M3, C3, FCER1G, H2-Q6, H2-Q8, SASH3, TGFB1	269	70	13588	5.77292	0.551911	0.0124648	0.754486
GOTERM_BP_FAT	GO:0048534~hemopoietic or lymphoid organ development	16	4.19948	0.000469	PTPRC, TNF, CD8A, LYN, CD3E, CRIP2, VAV1, CD74, TGFB1, CARD11, HIF1A, GADD45G, IRF1, SPNA1, H2-DMA, THPO	269	281	13588	2.87619	0.57041	0.0129147	0.793954
GOTERM_BP_FAT	GO:0002521~leukocyte differentiation	11	2.88714	0.00051	CARD11, PTPRC, TNF, CD8A, CD3E, GADD45G, IRF1, H2-DMA, VAV1, CD74, TGFB1	269	142	13588	3.91298	0.600577	0.0138088	0.862076
GOTERM_BP_FAT	GO:0008284~positive regulation of cell proliferation	16	4.19948	0.000524	PTPRC, TNF, LYN, CD3E, CRIP2, IL18, CLU, IRS1, TGFB1, CXCL10, CARD11, CORO1A, RAC2, NOTCH4, CD81, SASH3	269	284	13588	2.8458	0.610702	0.0139821	0.886088
GOTERM_BP_FAT	GO:0070665~positive regulation of leukocyte proliferation	7	1.83727	0.000529	CARD11, PTPRC, CORO1A, CD3E, IL18, CD81, SASH3	269	52	13588	6.79983	0.614535	0.0139214	0.895341
GOTERM_BP_FAT	GO:0042102~positive regulation of T cell proliferation	6	1.5748	0.000575	CARD11, PTPRC, CORO1A, CD3E, IL18, SASH3	269	35	13588	8.65937	0.644888	0.0148926	0.971993
GOTERM_BP_FAT	GO:0001916~positive regulation of T cell mediated cytotoxicity	4	1.04987	0.000584	PTPRC, P2RX7, H2-M3, H2-Q6, H2-Q8	269	9	13588	22.4502	0.650344	0.0148994	0.986457
GOTERM_BP_FAT	GO:0045058~T cell selection	5	1.31234	0.00068	CARD11, PTPRC, CD3E, H2-DMA, CD74	269	21	13588	12.0269	0.705885	0.0170887	1.14791
GOTERM_BP_FAT	GO:0002683~negative regulation of immune system process	8	2.09974	0.000736	GPX2, TIGIT, PTPRC, VTCN1, CD274, CD276, CD74, TGFB1	269	76	13588	5.31716	0.734104	0.0182297	1.24193
GOTERM_BP_FAT	GO:0002449~lymphocyte mediated immunity	8	2.09974	0.000736	CD8A, C3, IRF7, H2-AA, FCER1G, C2, H2-DMA, CD74	269	76	13588	5.31716	0.734104	0.0182297	1.24193
GOTERM_BP_FAT	GO:0002520~immune system development	16	4.19948	0.000775	PTPRC, TNF, CD8A, LYN, CD3E, CRIP2, VAV1, CD74, TGFB1, CARD11, HIF1A, GADD45G, IRF1, SPNA1, H2-DMA, THPO	269	295	13588	2.73969	0.752353	0.0189382	1.30815
GOTERM_BP_FAT	GO:0001914~regulation of T cell mediated cytotoxicity	4	1.04987	0.00111328	PTPRC, P2RX7, H2-M3, H2-Q6, H2-Q8	269	11	13588	18.3684	0.865343	0.0267311	1.87381
GOTERM_BP_FAT	GO:0045087~innate immune response	9	2.3622	0.00124853	DDX58, TMEM173, IRGM1, C3, SAMHD1, C2, MX2, TGFB1, DHX58	269	107	13588	4.24876	0.894469	0.0295383	2.09918
GOTERM_BP_FAT	GO:0008283~cell proliferation	14	3.67454	0.00126003	FZD9, PTPRC, TNF, ITGB2, MMP14, FKBP1B, CD74, ITGAM, TGFB1, TNFRSF1B, P2RX7, UHRF1, CXCR4, THPO	269	247	13588	2.86309	0.896634	0.0294202	2.11833
GOTERM_BP_FAT	GO:0043065~positive regulation of apoptosis	14	3.67454	0.00130777	PTPRC, TNF, CD3E, IL18, LGALS12, GZMB, TGFB1, GCH1, P2RX7, CASP4, CASP14, APOE, BIK, APAF1	269	248	13588	2.85154	0.905156	0.030128	2.19775
GOTERM_BP_FAT	GO:0042742~defense response to bacterium	9	2.3622	0.00132588	P2RX7, LYZ2, TNF, H2-M3, FGR, ANG4, PGLYRP1, FCER1G, NOS2	269	108	13588	4.20942	0.908203	0.0301537	2.22787
GOTERM_BP_FAT	GO:0050868~negative regulation of T cell activation	6	1.5748	0.00134681	TIGIT, VTCN1, CD274, CD276, CD74, TGFB1	269	42	13588	7.21614	0.911601	0.0302408	2.26266
GOTERM_BP_FAT	GO:0046651~lymphocyte proliferation	6	1.5748	0.00134681	PTPRC, P2RX7, CXCR4, ITGB2, FKBP1B, ITGAM	269	42	13588	7.21614	0.911601	0.0302408	2.26266
GOTERM_BP_FAT	GO:0002637~regulation of immunoglobulin production	5	1.31234	0.00135022	PTPRC, CD37, TNF, SASH3, TGFB1	269	25	13588	10.1026	0.912142	0.029943	2.26832
GOTERM_BP_FAT	GO:0043068~positive regulation of programmed cell death	14	3.67454	0.0013958	PTPRC, TNF, CD3E, IL18, LGALS12, GZMB, TGFB1, GCH1, P2RX7, CASP4, CASP14, APOE, BIK, APAF1	269	250	13588	2.82873	0.919072	0.0305626	2.34404
GOTERM_BP_FAT	GO:0016064~immunoglobulin mediated immune response	7	1.83727	0.00147541	C3, IRF7, H2-AA, FCER1G, C2, H2-DMA, CD74	269	63	13588	5.61256	0.92989	0.0318913	2.47616
GOTERM_BP_FAT	GO:0010942~positive regulation of cell death	14	3.67454	0.00150922	PTPRC, TNF, CD3E, IL18, LGALS12, GZMB, TGFB1, GCH1, P2RX7, CASP4, CASP14, APOE, BIK, APAF1	269	252	13588	2.80628	0.934036	0.0322241	2.53222
GOTERM_BP_FAT	GO:0001666~response to hypoxia	7	1.83727	0.00160161	HIF1A, IL18, NOS2, MMP14, SOD3, TGFB1, TRF	269	64	13588	5.52486	0.944157	0.0337645	2.68526
GOTERM_BP_FAT	GO:0070482~response to oxygen levels	7	1.83727	0.00173585	HIF1A, IL18, NOS2, MMP14, SOD3, TGFB1, TRF	269	65	13588	5.43986	0.956162	0.0361227	2.90723
GOTERM_BP_FAT	GO:0019724~B cell mediated immunity	7	1.83727	0.00173585	C3, IRF7, H2-AA, FCER1G, C2, H2-DMA, CD74	269	65	13588	5.43986	0.956162	0.0361227	2.90723
GOTERM_BP_FAT	GO:0006917~induction of apoptosis	11	2.88714	0.00176613	CASP4, TNF, CASP14, CD3E, APOE, IL18, LGALS12, BIK, GZMB, APAF1, GCH1	269	167	13588	3.3272	0.958491	0.0363221	2.95722
GOTERM_BP_FAT	GO:0012502~induction of programmed cell death	11	2.88714	0.00176613	CASP4, TNF, CASP14, CD3E, APOE, IL18, LGALS12, BIK, GZMB, APAF1, GCH1	269	167	13588	3.3272	0.958491	0.0363221	2.95722
GOTERM_BP_FAT	GO:0007159~leukocyte adhesion	4	1.04987	0.00235063	PTPRC, ITGA5, ITGB2, ITGAM	269	14	13588	14.4323	0.985536	0.0475246	3.91765
GOTERM_BP_FAT	GO:0045580~regulation of T cell differentiation	6	1.5748	0.0024631	CARD11, PTPRC, H2-AA, H2-DMA, CD74, SASH3	269	48	13588	6.31413	0.988193	0.0491925	4.10142
GOTERM_BP_FAT	GO:0045597~positive regulation of cell differentiation	11	2.88714	0.00249114	PTPRC, HIF1A, ETS1, CLU, CD276, H2-AA, ROBO2, SEMA4D, H2-DMA, CD74, SASH3	269	175	13588	3.1751	0.988775	0.0491942	4.14719
GOTERM_BP_FAT	GO:0007610~behavior	18	4.72441	0.00283139	FZD9, IL18, ITGB2, NPY1R, CELSR1, CCL5, ITGAM, CXCL10, CORO1A, RAC2, CCL20, ITGA5, CXCL16, ECSCR, CCR10, FCER1G, CMTM7, ROBO2	269	405	13588	2.24502	0.993926	0.0551302	4.7009
GOTERM_BP_FAT	GO:0051607~defense response to virus	4	1.04987	0.00289575	PTPRC, SAMHD1, RSAD2, H2-Q6, H2-Q8	269	15	13588	13.4701	0.994592	0.0557475	4.8053
GOTERM_BP_FAT	GO:0033077~T cell differentiation in the thymus	5	1.31234	0.00344522	CARD11, PTPRC, CD3E, H2-DMA, CD74	269	32	13588	7.89266	0.997995	0.0652936	5.69222
GOTERM_BP_FAT	GO:0045582~positive regulation of T cell differentiation	5	1.31234	0.00344522	PTPRC, H2-AA, H2-DMA, CD74, SASH3	269	32	13588	7.89266	0.997995	0.0652936	5.69222
GOTERM_BP_FAT	GO:0051250~negative regulation of lymphocyte activation	6	1.5748	0.00350755	TIGIT, VTCN1, CD274, CD276, CD74, TGFB1	269	52	13588	5.82842	0.998208	0.0657464	5.79234
GOTERM_BP_FAT	GO:0050866~negative regulation of cell activation	6	1.5748	0.00381174	TIGIT, VTCN1, CD274, CD276, CD74, TGFB1	269	53	13588	5.71845	0.998966	0.0705202	6.2795
GOTERM_BP_FAT	GO:0002695~negative regulation of leukocyte activation	6	1.5748	0.00381174	TIGIT, VTCN1, CD274, CD276, CD74, TGFB1	269	53	13588	5.71845	0.998966	0.0705202	6.2795
GOTERM_BP_FAT	GO:0045621~positive regulation of lymphocyte differentiation	5	1.31234	0.0043085	PTPRC, H2-AA, H2-DMA, CD74, SASH3	269	34	13588	7.42838	0.999579	0.078554	7.06998
GOTERM_BP_FAT	GO:0030005~cellular di-, tri-valent inorganic cation homeostasis	9	2.3622	0.00507191	PTPRC, P2RX7, HIF1A, APOE, NUCB2, CCR10, FKBP1B, TGFB1, TRF	269	134	13588	3.39266	0.999894	0.0909365	8.27256
GOTERM_BP_FAT	GO:0050727~regulation of inflammatory response	6	1.5748	0.00521887	GPX2, TNFRSF1B, C3, CD276, FCER1G, NT5E	269	57	13588	5.31716	0.999919	0.0925335	8.50237
GOTERM_BP_FAT	GO:0032733~positive regulation of interleukin-10 production	3	0.787402	0.00551683	TIGIT, FCER1G, SASH3	269	6	13588	25.2565	0.999953	0.0966182	8.96664
GOTERM_BP_FAT	GO:0045123~cellular extravasation	3	0.787402	0.00551683	TNF, ITGB2, ITGAM	269	6	13588	25.2565	0.999953	0.0966182	8.96664
GOTERM_BP_FAT	GO:0002702~positive regulation of production of molecular mediator of immune response	3	0.787402	0.00551683	CD37, FCER1G, SASH3	269	6	13588	25.2565	0.999953	0.0966182	8.96664
GOTERM_BP_FAT	GO:0045619~regulation of lymphocyte differentiation	6	1.5748	0.00562122	CARD11, PTPRC, H2-AA, H2-DMA, CD74, SASH3	269	58	13588	5.22548	0.999961	0.097415	9.12879
GOTERM_BP_FAT	GO:0008219~cell death	20	5.24934	0.00564836	LYZ2, TNF, GZMA, CLU, PGLYRP1, LGALS12, GZMB, TGFB1, TMEM173, TNFSF10, TNFRSF1B, KHDC1A, P2RX7, CASP4, CASP14, GADD45G, ZC3H12A, APAF1, XAF1, SRGN	269	507	13588	1.99262	0.999963	0.0969331	9.17089
GOTERM_BP_FAT	GO:0050871~positive regulation of B cell activation	5	1.31234	0.00585951	CARD11, PTPRC, CD81, SASH3, TGFB1	269	37	13588	6.82608	0.999975	0.0994359	9.49786
GOTERM_BP_FAT	GO:0032663~regulation of interleukin-2 production	4	1.04987	0.00674655	CARD11, CD3E, CD276, SASH3	269	20	13588	10.1026	0.999995	0.112601	10.8594
GOTERM_BP_FAT	GO:0002253~activation of immune response	7	1.83727	0.00701804	PTPRC, LYN, C3, CD3E, UNC93B1, FCER1G, C2	269	86	13588	4.11152	0.999997	0.115805	11.2723
GOTERM_BP_FAT	GO:0016265~death	20	5.24934	0.00724085	LYZ2, TNF, GZMA, CLU, PGLYRP1, LGALS12, GZMB, TGFB1, TMEM173, TNFSF10, TNFRSF1B, KHDC1A, P2RX7, CASP4, CASP14, GADD45G, ZC3H12A, APAF1, XAF1, SRGN	269	519	13588	1.94655	0.999998	0.11819	11.6098
GOTERM_BP_FAT	GO:0019637~organophosphate metabolic process	10	2.62467	0.00823207	LPCAT1, SMPDL3B, CD81, SLC37A2, PLA2G2A, PLA2G4F, PLA2G4C, PLA2G3, PLA2G5, PLA2G2F	269	176	13588	2.87006	1	0.132123	13.0966
GOTERM_BP_FAT	GO:0055066~di-, tri-valent inorganic cation homeostasis	9	2.3622	0.00839105	PTPRC, P2RX7, HIF1A, APOE, NUCB2, CCR10, FKBP1B, TGFB1, TRF	269	146	13588	3.11382	1	0.133325	13.3328
GOTERM_BP_FAT	GO:0030890~positive regulation of B cell proliferation	4	1.04987	0.00885346	CARD11, PTPRC, CD81, SASH3	269	22	13588	9.18418	1	0.138948	14.0166
GOTERM_BP_FAT	GO:0050728~negative regulation of inflammatory response	4	1.04987	0.00885346	GPX2, TNFRSF1B, CD276, NT5E	269	22	13588	9.18418	1	0.138948	14.0166
GOTERM_BP_FAT	GO:0048585~negative regulation of response to stimulus	6	1.5748	0.0090689	GPX2, PTPRC, TNFRSF1B, CD276, NT5E, TGFB1	269	65	13588	4.66274	1	0.140872	14.3334
GOTERM_BP_FAT	GO:0006874~cellular calcium ion homeostasis	7	1.83727	0.00917544	PTPRC, P2RX7, APOE, NUCB2, CCR10, FKBP1B, TGFB1	269	91	13588	3.88562	1	0.141201	14.4897
GOTERM_BP_FAT	GO:0050900~leukocyte migration	5	1.31234	0.0099879	CORO1A, TNF, FCER1G, ITGB2, ITGAM	269	43	13588	5.87361	1	0.151479	15.6726
GOTERM_BP_FAT	GO:0045059~positive thymic T cell selection	3	0.787402	0.0100329	PTPRC, H2-DMA, CD74	269	8	13588	18.9424	1	0.150848	15.7377
GOTERM_BP_FAT	GO:0001912~positive regulation of leukocyte mediated cytotoxicity	4	1.04987	0.0100352	PTPRC, P2RX7, H2-M3, H2-Q6, H2-Q8	269	23	13588	8.78487	1	0.14964	15.7411
GOTERM_BP_FAT	GO:0031343~positive regulation of cell killing	4	1.04987	0.0100352	PTPRC, P2RX7, H2-M3, H2-Q6, H2-Q8	269	23	13588	8.78487	1	0.14964	15.7411
GOTERM_BP_FAT	GO:0019835~cytolysis	4	1.04987	0.0100352	P2RX7, LYZ2, GZMA, GZMB	269	23	13588	8.78487	1	0.14964	15.7411
GOTERM_BP_FAT	GO:0051130~positive regulation of cellular component organization	8	2.09974	0.01052	TNF, PLEK, C3, FCER1G, MFGE8, ROBO2, SEMA4D, TGFB1	269	122	13588	3.31233	1	0.155037	16.439
GOTERM_BP_FAT	GO:0030003~cellular cation homeostasis	9	2.3622	0.0105612	PTPRC, P2RX7, HIF1A, APOE, NUCB2, CCR10, FKBP1B, TGFB1, TRF	269	152	13588	2.9909	1	0.154344	16.4981
GOTERM_BP_FAT	GO:0055080~cation homeostasis	10	2.62467	0.0108364	SLC9A9, PTPRC, P2RX7, HIF1A, APOE, NUCB2, CCR10, FKBP1B, TGFB1, TRF	269	184	13588	2.74527	1	0.156789	16.8915
GOTERM_BP_FAT	GO:0055074~calcium ion homeostasis	7	1.83727	0.011214	PTPRC, P2RX7, APOE, NUCB2, CCR10, FKBP1B, TGFB1	269	95	13588	3.72201	1	0.160537	17.4287
GOTERM_BP_FAT	GO:0030834~regulation of actin filament depolymerization	4	1.04987	0.0113043	PLEK, CAPG, SPNA1, VILL	269	24	13588	8.41884	1	0.160461	17.5567
GOTERM_BP_FAT	GO:0030031~cell projection assembly	6	1.5748	0.0122791	P2RX7, RAC2, LAMA5, PRDX6, TTYH1, CAPG	269	70	13588	4.32969	1	0.171773	18.9262
GOTERM_BP_FAT	GO:0050764~regulation of phagocytosis	4	1.04987	0.0126617	C3, FCER1G, MFGE8, TGFB1	269	25	13588	8.08208	1	0.175307	19.4578
GOTERM_BP_FAT	GO:0008624~induction of apoptosis by extracellular signals	4	1.04987	0.0126617	TNF, CD3E, IL18, GZMB	269	25	13588	8.08208	1	0.175307	19.4578
GOTERM_BP_FAT	GO:0060688~regulation of morphogenesis of a branching structure	4	1.04987	0.0126617	TNF, HOXD13, TGFB1, ETV4	269	25	13588	8.08208	1	0.175307	19.4578
GOTERM_BP_FAT	GO:0045060~negative thymic T cell selection	3	0.787402	0.0127327	PTPRC, CD3E, CD74	269	9	13588	16.8377	1	0.174872	19.5562
GOTERM_BP_FAT	GO:0006800~oxygen and reactive oxygen species metabolic process	5	1.31234	0.0135809	P2RX7, PXDN, NOX1, NOS2, SOD3	269	47	13588	5.37372	1	0.18406	20.7218
GOTERM_BP_FAT	GO:0006875~cellular metal ion homeostasis	7	1.83727	0.0141881	PTPRC, P2RX7, APOE, NUCB2, CCR10, FKBP1B, TGFB1	269	100	13588	3.53591	1	0.19009	21.5464
GOTERM_BP_FAT	GO:0032270~positive regulation of cellular protein metabolic process	7	1.83727	0.0141881	P2RX7, TNF, LYN, CD3E, ITLN1, CD81, TGFB1	269	100	13588	3.53591	1	0.19009	21.5464
GOTERM_BP_FAT	GO:0015674~di-, tri-valent inorganic cation transport	9	2.3622	0.0145607	STEAP4, PTPRC, TMEM37, P2RX7, CORO1A, BHLHA15, TRPV6, FKBP1B, TRF	269	161	13588	2.82371	1	0.193176	22.0484
GOTERM_BP_FAT	GO:0032535~regulation of cellular component size	9	2.3622	0.0145607	HPN, CORO1A, PLEK, ACAP1, CD81, CAPG, SPNA1, VILL, TGFB1	269	161	13588	2.82371	1	0.193176	22.0484
GOTERM_BP_FAT	GO:0002757~immune response-activating signal transduction	5	1.31234	0.0145916	PTPRC, LYN, CD3E, UNC93B1, FCER1G	269	48	13588	5.26177	1	0.192147	22.09
GOTERM_BP_FAT	GO:0006644~phospholipid metabolic process	9	2.3622	0.0155815	LPCAT1, SMPDL3B, CD81, PLA2G2A, PLA2G4F, PLA2G4C, PLA2G3, PLA2G5, PLA2G2F	269	163	13588	2.78906	1	0.202394	23.4084
GOTERM_BP_FAT	GO:0060326~cell chemotaxis	4	1.04987	0.0156448	CORO1A, FCER1G, ITGB2, ITGAM	269	27	13588	7.48341	1	0.201694	23.4919
GOTERM_BP_FAT	GO:0030595~leukocyte chemotaxis	4	1.04987	0.0156448	CORO1A, FCER1G, ITGB2, ITGAM	269	27	13588	7.48341	1	0.201694	23.4919
GOTERM_BP_FAT	GO:0043383~negative T cell selection	3	0.787402	0.0157105	PTPRC, CD3E, CD74	269	10	13588	15.1539	1	0.201033	23.5786
GOTERM_BP_FAT	GO:0032653~regulation of interleukin-10 production	3	0.787402	0.0157105	TIGIT, FCER1G, SASH3	269	10	13588	15.1539	1	0.201033	23.5786
GOTERM_BP_FAT	GO:0043368~positive T cell selection	3	0.787402	0.0157105	PTPRC, H2-DMA, CD74	269	10	13588	15.1539	1	0.201033	23.5786
GOTERM_BP_FAT	GO:0032101~regulation of response to external stimulus	7	1.83727	0.016215	GPX2, TNFRSF1B, PLEK, C3, CD276, FCER1G, NT5E	269	103	13588	3.43292	1	0.205381	24.2412
GOTERM_BP_FAT	GO:0001525~angiogenesis	8	2.09974	0.0163099	HIF1A, CXCR4, IL18, NOTCH4, ECSCR, PLCD3, ZC3H12A, MMP14	269	133	13588	3.03838	1	0.205035	24.3651
GOTERM_BP_FAT	GO:0008064~regulation of actin polymerization or depolymerization	5	1.31234	0.0167528	CORO1A, PLEK, CAPG, SPNA1, VILL	269	50	13588	5.0513	1	0.20858	24.9413
GOTERM_BP_FAT	GO:0048514~blood vessel morphogenesis	10	2.62467	0.0168134	HIF1A, CXCR4, APOE, IL18, NOTCH4, ECSCR, PLCD3, ZC3H12A, NOS2, MMP14	269	198	13588	2.55116	1	0.207837	25.0199
GOTERM_BP_FAT	GO:0030832~regulation of actin filament length	5	1.31234	0.0179044	CORO1A, PLEK, CAPG, SPNA1, VILL	269	51	13588	4.95226	1	0.218362	26.4203
GOTERM_BP_FAT	GO:0055065~metal ion homeostasis	7	1.83727	0.0184338	PTPRC, P2RX7, APOE, NUCB2, CCR10, FKBP1B, TGFB1	269	106	13588	3.33576	1	0.222606	27.091
GOTERM_BP_FAT	GO:0007243~protein kinase cascade	11	2.88714	0.0188324	PTPRC, P2RX7, TNF, PLEK, GADD45G, NOTCH4, CD81, MAP4K1, TIFA, IRS1, CD74	269	236	13588	2.35442	1	0.225382	27.5922
GOTERM_BP_FAT	GO:0031401~positive regulation of protein modification process	6	1.5748	0.0188836	P2RX7, LYN, CD3E, ITLN1, CD81, TGFB1	269	78	13588	3.88562	1	0.224455	27.6563
GOTERM_BP_FAT	GO:0051282~regulation of sequestering of calcium ion	3	0.787402	0.0189543	PTPRC, P2RX7, FKBP1B	269	11	13588	13.7763	1	0.223745	27.7448
GOTERM_BP_FAT	GO:0060402~calcium ion transport into cytosol	3	0.787402	0.0189543	PTPRC, P2RX7, FKBP1B	269	11	13588	13.7763	1	0.223745	27.7448
GOTERM_BP_FAT	GO:0051283~negative regulation of sequestering of calcium ion	3	0.787402	0.0189543	PTPRC, P2RX7, FKBP1B	269	11	13588	13.7763	1	0.223745	27.7448
GOTERM_BP_FAT	GO:0060401~cytosolic calcium ion transport	3	0.787402	0.0189543	PTPRC, P2RX7, FKBP1B	269	11	13588	13.7763	1	0.223745	27.7448
GOTERM_BP_FAT	GO:0051209~release of sequestered calcium ion into cytosol	3	0.787402	0.0189543	PTPRC, P2RX7, FKBP1B	269	11	13588	13.7763	1	0.223745	27.7448
GOTERM_BP_FAT	GO:0002764~immune response-regulating signal transduction	5	1.31234	0.0191041	PTPRC, LYN, CD3E, UNC93B1, FCER1G	269	52	13588	4.85702	1	0.223867	27.9319
GOTERM_BP_FAT	GO:0035239~tube morphogenesis	9	2.3622	0.0201864	HIF1A, LAMA5, CXCR4, NOTCH4, CELSR1, APAF1, MMP14, TGFB1, ETV4	269	171	13588	2.65858	1	0.233557	29.2703
GOTERM_BP_FAT	GO:0001910~regulation of leukocyte mediated cytotoxicity	4	1.04987	0.0207988	PTPRC, P2RX7, H2-M3, H2-Q6, H2-Q8	269	30	13588	6.73507	1	0.238281	30.0173
GOTERM_BP_FAT	GO:0031341~regulation of cell killing	4	1.04987	0.0207988	PTPRC, P2RX7, H2-M3, H2-Q6, H2-Q8	269	30	13588	6.73507	1	0.238281	30.0173
GOTERM_BP_FAT	GO:0031348~negative regulation of defense response	4	1.04987	0.0207988	GPX2, TNFRSF1B, CD276, NT5E	269	30	13588	6.73507	1	0.238281	30.0173
GOTERM_BP_FAT	GO:0002889~regulation of immunoglobulin mediated immune response	4	1.04987	0.0207988	PTPRC, C3, FCER1G, TGFB1	269	30	13588	6.73507	1	0.238281	30.0173
GOTERM_BP_FAT	GO:0002712~regulation of B cell mediated immunity	4	1.04987	0.0207988	PTPRC, C3, FCER1G, TGFB1	269	30	13588	6.73507	1	0.238281	30.0173
GOTERM_BP_FAT	GO:0051247~positive regulation of protein metabolic process	7	1.83727	0.020852	P2RX7, TNF, LYN, CD3E, ITLN1, CD81, TGFB1	269	109	13588	3.24395	1	0.237332	30.0819
GOTERM_BP_FAT	GO:0016477~cell migration	11	2.88714	0.0208959	FMNL1, CORO1A, TNF, HIF1A, LAMA5, CXCR4, FCER1G, ITGB2, MMP14, TGFB1, ITGAM	269	240	13588	2.31518	1	0.236302	30.1351
GOTERM_BP_FAT	GO:0050864~regulation of B cell activation	5	1.31234	0.0229969	CARD11, PTPRC, CD81, SASH3, TGFB1	269	55	13588	4.59209	1	0.255405	32.6378
GOTERM_BP_FAT	GO:0001934~positive regulation of protein amino acid phosphorylation	5	1.31234	0.0243938	P2RX7, LYN, CD3E, ITLN1, CD81	269	56	13588	4.51009	1	0.267185	34.2548
GOTERM_BP_FAT	GO:0030888~regulation of B cell proliferation	4	1.04987	0.024691	CARD11, PTPRC, CD81, SASH3	269	32	13588	6.31413	1	0.268393	34.5941
GOTERM_BP_FAT	GO:0055114~oxidation reduction	22	5.77428	0.0250284	STEAP4, PXDN, ALDH1L1, CYP2D22, CYP2F2, FADS1, NOX1, DUOX2, CMAH, FADS3, ACADL, SOD3, RDH9, GPX2, PYCR1, CYBA, CBR2, PRDX6, NMRAL1, SLC37A2, MICAL1, NOS2	269	672	13588	1.6537	1	0.269957	34.9772
GOTERM_BP_FAT	GO:0022612~gland morphogenesis	6	1.5748	0.0251349	TNF, LAMA5, DUOX2, HOXD13, TGFB1, ETV4	269	84	13588	3.60807	1	0.269366	35.0977
GOTERM_BP_FAT	GO:0042981~regulation of apoptosis	19	4.98688	0.0258485	PTPRC, TNF, CD3E, IL18, CLU, LGALS12, GZMB, TGFB1, CD74, GCH1, CARD11, P2RX7, HIF1A, CASP4, APOE, CASP14, FCER1G, BIK, APAF1	269	553	13588	1.73553	1	0.274341	35.8998
GOTERM_BP_FAT	GO:0042089~cytokine biosynthetic process	3	0.787402	0.0261942	IL18, IRF7, GADD45G	269	13	13588	11.6568	1	0.275899	36.285
GOTERM_BP_FAT	GO:0009100~glycoprotein metabolic process	8	2.09974	0.0265526	FUT9, HIF1A, B3GNT5, B3GALT5, B3GNT7, ST3GAL6, ST8SIA5, CHST14	269	147	13588	2.74901	1	0.277548	36.682
GOTERM_BP_FAT	GO:0009101~glycoprotein biosynthetic process	7	1.83727	0.0283283	FUT9, B3GNT5, B3GALT5, B3GNT7, ST3GAL6, ST8SIA5, CHST14	269	117	13588	3.02215	1	0.291671	38.6151
GOTERM_BP_FAT	GO:0043067~regulation of programmed cell death	19	4.98688	0.0289301	PTPRC, TNF, CD3E, IL18, CLU, LGALS12, GZMB, TGFB1, CD74, GCH1, CARD11, P2RX7, HIF1A, CASP4, APOE, CASP14, FCER1G, BIK, APAF1	269	560	13588	1.71383	1	0.295276	39.2575
GOTERM_BP_FAT	GO:0042107~cytokine metabolic process	3	0.787402	0.0301681	IL18, IRF7, GADD45G	269	14	13588	10.8242	1	0.304242	40.5593
GOTERM_BP_FAT	GO:0045076~regulation of interleukin-2 biosynthetic process	3	0.787402	0.0301681	CARD11, CD3E, CD276	269	14	13588	10.8242	1	0.304242	40.5593
GOTERM_BP_FAT	GO:0002891~positive regulation of immunoglobulin mediated immune response	3	0.787402	0.0301681	PTPRC, C3, FCER1G	269	14	13588	10.8242	1	0.304242	40.5593
GOTERM_BP_FAT	GO:0002714~positive regulation of B cell mediated immunity	3	0.787402	0.0301681	PTPRC, C3, FCER1G	269	14	13588	10.8242	1	0.304242	40.5593
GOTERM_BP_FAT	GO:0010941~regulation of cell death	19	4.98688	0.0302521	PTPRC, TNF, CD3E, IL18, CLU, LGALS12, GZMB, TGFB1, CD74, GCH1, CARD11, P2RX7, HIF1A, CASP4, APOE, CASP14, FCER1G, BIK, APAF1	269	563	13588	1.7047	1	0.303301	40.6466
GOTERM_BP_FAT	GO:0042327~positive regulation of phosphorylation	5	1.31234	0.0304871	P2RX7, LYN, CD3E, ITLN1, CD81	269	60	13588	4.20942	1	0.30364	40.8905
GOTERM_BP_FAT	GO:0032956~regulation of actin cytoskeleton organization	5	1.31234	0.0304871	CORO1A, PLEK, CAPG, SPNA1, VILL	269	60	13588	4.20942	1	0.30364	40.8905
GOTERM_BP_FAT	GO:0044087~regulation of cellular component biogenesis	6	1.5748	0.0312532	CORO1A, PLEK, CAPG, SPNA1, MMP14, VILL	269	89	13588	3.40537	1	0.30839	41.6786
GOTERM_BP_FAT	GO:0032970~regulation of actin filament-based process	5	1.31234	0.0321382	CORO1A, PLEK, CAPG, SPNA1, VILL	269	61	13588	4.14041	1	0.314026	42.5768
GOTERM_BP_FAT	GO:0006816~calcium ion transport	7	1.83727	0.0326542	PTPRC, TMEM37, P2RX7, CORO1A, BHLHA15, TRPV6, FKBP1B	269	121	13588	2.92224	1	0.316568	43.0945
GOTERM_BP_FAT	GO:0001932~regulation of protein amino acid phosphorylation	7	1.83727	0.0326542	PTPRC, P2RX7, TNF, LYN, CD3E, ITLN1, CD81	269	121	13588	2.92224	1	0.316568	43.0945
GOTERM_BP_FAT	GO:0032102~negative regulation of response to external stimulus	4	1.04987	0.033568	GPX2, TNFRSF1B, CD276, NT5E	269	36	13588	5.61256	1	0.322257	44.0005
GOTERM_BP_FAT	GO:0033559~unsaturated fatty acid metabolic process	4	1.04987	0.033568	CYP2D22, PTGES, FADS1, CD74	269	36	13588	5.61256	1	0.322257	44.0005
GOTERM_BP_FAT	GO:0007204~elevation of cytosolic calcium ion concentration	4	1.04987	0.033568	PTPRC, P2RX7, CCR10, FKBP1B	269	36	13588	5.61256	1	0.322257	44.0005
GOTERM_BP_FAT	GO:0045937~positive regulation of phosphate metabolic process	5	1.31234	0.0338408	P2RX7, LYN, CD3E, ITLN1, CD81	269	62	13588	4.07363	1	0.322764	44.2684
GOTERM_BP_FAT	GO:0010562~positive regulation of phosphorus metabolic process	5	1.31234	0.0338408	P2RX7, LYN, CD3E, ITLN1, CD81	269	62	13588	4.07363	1	0.322764	44.2684
GOTERM_BP_FAT	GO:0006486~protein amino acid glycosylation	6	1.5748	0.03394	FUT9, B3GNT5, B3GALT5, B3GNT7, ST3GAL6, ST8SIA5	269	91	13588	3.33053	1	0.321896	44.3654
GOTERM_BP_FAT	GO:0043413~biopolymer glycosylation	6	1.5748	0.03394	FUT9, B3GNT5, B3GALT5, B3GNT7, ST3GAL6, ST8SIA5	269	91	13588	3.33053	1	0.321896	44.3654
GOTERM_BP_FAT	GO:0070085~glycosylation	6	1.5748	0.03394	FUT9, B3GNT5, B3GALT5, B3GNT7, ST3GAL6, ST8SIA5	269	91	13588	3.33053	1	0.321896	44.3654
GOTERM_BP_FAT	GO:0032760~positive regulation of tumor necrosis factor production	3	0.787402	0.0343638	FCER1G, SASH3, CD14	269	15	13588	10.1026	1	0.323585	44.7785
GOTERM_BP_FAT	GO:0030334~regulation of cell migration	6	1.5748	0.0353355	CORO1A, HIF1A, LAMA5, CXCR4, IRS1, CXCL10	269	92	13588	3.29433	1	0.329493	45.7145
GOTERM_BP_FAT	GO:0030335~positive regulation of cell migration	4	1.04987	0.0360129	CORO1A, HIF1A, IRS1, CXCL10	269	37	13588	5.46087	1	0.333041	46.3582
GOTERM_BP_FAT	GO:0048754~branching morphogenesis of a tube	6	1.5748	0.036766	LAMA5, CXCR4, NOTCH4, MMP14, TGFB1, ETV4	269	93	13588	3.2589	1	0.337102	47.0654
GOTERM_BP_FAT	GO:0001763~morphogenesis of a branching structure	7	1.83727	0.0373886	LAMA5, CXCR4, NOTCH4, HOXD13, MMP14, TGFB1, ETV4	269	125	13588	2.82873	1	0.340119	47.6435
GOTERM_BP_FAT	GO:0051480~cytosolic calcium ion homeostasis	4	1.04987	0.0385469	PTPRC, P2RX7, CCR10, FKBP1B	269	38	13588	5.31716	1	0.347046	48.7032
GOTERM_BP_FAT	GO:0070167~regulation of biomineral formation	3	0.787402	0.0387712	P2RX7, CD276, SRGN	269	16	13588	9.47119	1	0.347021	48.9059
GOTERM_BP_FAT	GO:0030500~regulation of bone mineralization	3	0.787402	0.0387712	P2RX7, CD276, SRGN	269	16	13588	9.47119	1	0.347021	48.9059
GOTERM_BP_FAT	GO:0042095~interferon-gamma biosynthetic process	2	0.524934	0.039059	IL18, GADD45G	269	2	13588	50.513	1	0.347459	49.1651
GOTERM_BP_FAT	GO:0002476~antigen processing and presentation of endogenous peptide antigen via MHC class Ib	2	0.524934	0.039059	H2-M3, H2-Q6, H2-Q8	269	2	13588	50.513	1	0.347459	49.1651
GOTERM_BP_FAT	GO:0043254~regulation of protein complex assembly	5	1.31234	0.039259	CORO1A, PLEK, CAPG, SPNA1, VILL	269	65	13588	3.88562	1	0.347257	49.3445
GOTERM_BP_FAT	GO:0006457~protein folding	7	1.83727	0.0399121	TOR3A, H2-DMB1, H2-DMA, FKBP11, FKBP1B, CD74, H2-DMB2	269	127	13588	2.78418	1	0.350312	49.926
GOTERM_BP_FAT	GO:0010033~response to organic substance	17	4.46194	0.0429374	CYP2D22, LYN, GATM, H2-M3, RBM3, STAT1, CCL5, MMP14, FKBP1B, IRS1, TRF, TGFB1, CD48, CORO1A, P2RX7, APOE, CD14	269	505	13588	1.70044	1	0.369955	52.5392
GOTERM_BP_FAT	GO:0009395~phospholipid catabolic process	3	0.787402	0.0433802	SMPDL3B, PLA2G4F, PLA2G4C	269	17	13588	8.91406	1	0.371312	52.9107
GOTERM_BP_FAT	GO:0030593~neutrophil chemotaxis	3	0.787402	0.0433802	FCER1G, ITGB2, ITGAM	269	17	13588	8.91406	1	0.371312	52.9107
GOTERM_BP_FAT	GO:0016337~cell-cell adhesion	10	2.62467	0.0446347	CLDN8, PTPRC, PLEK, ITGA5, TTYH1, ROBO2, ITGB2, CELSR1, ITGAM, PCDH18	269	236	13588	2.14038	1	0.378171	53.9484
GOTERM_BP_FAT	GO:0031399~regulation of protein modification process	8	2.09974	0.0452145	PTPRC, P2RX7, TNF, LYN, CD3E, ITLN1, CD81, TGFB1	269	165	13588	2.44912	1	0.380375	54.4207
GOTERM_BP_FAT	GO:0051272~positive regulation of cell motion	4	1.04987	0.0466767	CORO1A, HIF1A, IRS1, CXCL10	269	41	13588	4.9281	1	0.388395	55.5916
GOTERM_BP_FAT	GO:0002429~immune response-activating cell surface receptor signaling pathway	4	1.04987	0.0466767	PTPRC, LYN, CD3E, FCER1G	269	41	13588	4.9281	1	0.388395	55.5916
GOTERM_BP_FAT	GO:0043029~T cell homeostasis	3	0.787402	0.0481813	P2RX7, CORO1A, TGFB1	269	18	13588	8.41884	1	0.396513	56.767
GOTERM_BP_FAT	GO:0019722~calcium-mediated signaling	3	0.787402	0.0481813	LAT, TNF, BHLHA15	269	18	13588	8.41884	1	0.396513	56.767
GOTERM_BP_FAT	GO:0002861~regulation of inflammatory response to antigenic stimulus	3	0.787402	0.0481813	GPX2, C3, FCER1G	269	18	13588	8.41884	1	0.396513	56.767
GOTERM_BP_FAT	GO:0032755~positive regulation of interleukin-6 production	3	0.787402	0.0481813	P2RX7, TNF, FCER1G	269	18	13588	8.41884	1	0.396513	56.767
GOTERM_BP_FAT	GO:0030030~cell projection organization	12	3.14961	0.0524438	P2RX7, CORO1A, RAC2, LAMA5, CXCR4, PRDX6, TTYH1, CAPG, CLU, STXBP1, ROBO2, ETV4	269	319	13588	1.90018	1	0.421791	59.9397
GOTERM_BP_FAT	GO:0043244~regulation of protein complex disassembly	4	1.04987	0.0525275	PLEK, CAPG, SPNA1, VILL	269	43	13588	4.69888	1	0.420527	59.9998
GOTERM_BP_FAT	GO:0001568~blood vessel development	10	2.62467	0.0530411	HIF1A, CXCR4, APOE, IL18, NOTCH4, ECSCR, PLCD3, ZC3H12A, NOS2, MMP14	269	244	13588	2.07021	1	0.421919	60.3664
GOTERM_BP_FAT	GO:0051693~actin filament capping	3	0.787402	0.0531652	CAPG, SPNA1, VILL	269	19	13588	7.97574	1	0.420915	60.4545
GOTERM_BP_FAT	GO:0006801~superoxide metabolic process	3	0.787402	0.0531652	NOX1, NOS2, SOD3	269	19	13588	7.97574	1	0.420915	60.4545
GOTERM_BP_FAT	GO:0007155~cell adhesion	18	4.72441	0.0533364	CLDN8, PTPRC, SVEP1, PLEK, FERMT3, ITGB2, MFGE8, CELSR1, ITGAM, MUC4, PCDH18, CD84, VWF, LGALS3BP, LAMA5, ITGA5, TTYH1, ROBO2	269	561	13588	1.62074	1	0.420208	60.5758
GOTERM_BP_FAT	GO:0009967~positive regulation of signal transduction	8	2.09974	0.0542955	CARD11, PTPRC, P2RX7, TNF, HIF1A, LYN, CD8A, CD3E	269	172	13588	2.34944	1	0.42427	61.2485
GOTERM_BP_FAT	GO:0022610~biological adhesion	18	4.72441	0.0552819	CLDN8, PTPRC, SVEP1, PLEK, FERMT3, ITGB2, MFGE8, CELSR1, ITGAM, MUC4, PCDH18, CD84, VWF, LGALS3BP, LAMA5, ITGA5, TTYH1, ROBO2	269	562	13588	1.61785	1	0.428428	61.9293
GOTERM_BP_FAT	GO:0048870~cell motility	11	2.88714	0.0553265	FMNL1, CORO1A, TNF, HIF1A, LAMA5, CXCR4, FCER1G, ITGB2, MMP14, TGFB1, ITGAM	269	284	13588	1.95649	1	0.426952	61.9598
GOTERM_BP_FAT	GO:0051674~localization of cell	11	2.88714	0.0553265	FMNL1, CORO1A, TNF, HIF1A, LAMA5, CXCR4, FCER1G, ITGB2, MMP14, TGFB1, ITGAM	269	284	13588	1.95649	1	0.426952	61.9598
GOTERM_BP_FAT	GO:0002768~immune response-regulating cell surface receptor signaling pathway	4	1.04987	0.0555793	PTPRC, LYN, CD3E, FCER1G	269	44	13588	4.59209	1	0.42672	62.1323
GOTERM_BP_FAT	GO:0040017~positive regulation of locomotion	4	1.04987	0.0555793	CORO1A, HIF1A, IRS1, CXCL10	269	44	13588	4.59209	1	0.42672	62.1323
GOTERM_BP_FAT	GO:0002720~positive regulation of cytokine production during immune response	2	0.524934	0.0580147	FCER1G, SASH3	269	3	13588	33.6753	1	0.439192	63.7568
GOTERM_BP_FAT	GO:0048878~chemical homeostasis	13	3.41207	0.0583994	SLC9A9, PTPRC, AQP4, FKBP1B, TRF, TGFB1, CKB, P2RX7, HIF1A, APOE, BHLHA15, CCR10, NUCB2	269	365	13588	1.79909	1	0.439662	64.0073
GOTERM_BP_FAT	GO:0030833~regulation of actin filament polymerization	4	1.04987	0.0587138	CORO1A, CAPG, SPNA1, VILL	269	45	13588	4.49005	1	0.439728	64.2109
GOTERM_BP_FAT	GO:0001944~vasculature development	10	2.62467	0.0594103	HIF1A, CXCR4, APOE, IL18, NOTCH4, ECSCR, PLCD3, ZC3H12A, NOS2, MMP14	269	250	13588	2.02052	1	0.441956	64.6579
GOTERM_BP_FAT	GO:0051270~regulation of cell motion	6	1.5748	0.0605306	CORO1A, HIF1A, LAMA5, CXCR4, IRS1, CXCL10	269	107	13588	2.83251	1	0.446524	65.366
GOTERM_BP_FAT	GO:0006928~cell motion	13	3.41207	0.0605999	FMNL1, TNF, ITGB2, MMP14, ITGAM, TGFB1, CORO1A, HIF1A, CXCR4, LAMA5, FCER1G, ROBO2, ETV4	269	367	13588	1.78929	1	0.445193	65.4094
GOTERM_BP_FAT	GO:0007229~integrin-mediated signaling pathway	5	1.31234	0.0631052	LAT, ITGA5, ITGB2, VAV1, ITGAM	269	76	13588	3.32322	1	0.457248	66.943
GOTERM_BP_FAT	GO:0048873~homeostasis of number of cells within a tissue	3	0.787402	0.0636455	P2RX7, CORO1A, SASH3	269	21	13588	7.21614	1	0.458448	67.2652
GOTERM_BP_FAT	GO:0030835~negative regulation of actin filament depolymerization	3	0.787402	0.0636455	CAPG, SPNA1, VILL	269	21	13588	7.21614	1	0.458448	67.2652
GOTERM_BP_FAT	GO:0050801~ion homeostasis	11	2.88714	0.0657518	SLC9A9, PTPRC, P2RX7, HIF1A, APOE, NUCB2, CCR10, FKBP1B, TGFB1, TRF, CKB	269	293	13588	1.89639	1	0.467967	68.4935
GOTERM_BP_FAT	GO:0040012~regulation of locomotion	6	1.5748	0.066537	CORO1A, HIF1A, LAMA5, CXCR4, IRS1, CXCL10	269	110	13588	2.75526	1	0.470369	68.9401
GOTERM_BP_FAT	GO:0034599~cellular response to oxidative stress	3	0.787402	0.0691247	PYCR1, PXDN, HIF1A	269	22	13588	6.88814	1	0.482024	70.3703
GOTERM_BP_FAT	GO:0042592~homeostatic process	18	4.72441	0.0698598	SLC9A9, PTPRC, LYN, AQP4, FKBP1B, TRF, TGFB1, CKB, GPX2, CORO1A, P2RX7, HIF1A, BHLHA15, APOE, PRDX6, NUCB2, CCR10, SASH3	269	584	13588	1.55691	1	0.484029	70.7652
GOTERM_BP_FAT	GO:0022900~electron transport chain	6	1.5748	0.0707195	CYBA, FADS1, SLC37A2, NOX1, CMAH, FADS3	269	112	13588	2.70605	1	0.486636	71.2207
GOTERM_BP_FAT	GO:0002237~response to molecule of bacterial origin	4	1.04987	0.0720556	P2RX7, H2-M3, STAT1, CD14	269	49	13588	4.12351	1	0.491573	71.9153
GOTERM_BP_FAT	GO:0006909~phagocytosis	4	1.04987	0.0720556	P2RX7, FCER1G, MFGE8, VAV1	269	49	13588	4.12351	1	0.491573	71.9153
GOTERM_BP_FAT	GO:0006873~cellular ion homeostasis	10	2.62467	0.0741717	PTPRC, P2RX7, HIF1A, APOE, NUCB2, CCR10, FKBP1B, TGFB1, TRF, CKB	269	261	13588	1.93536	1	0.500226	72.9833
GOTERM_BP_FAT	GO:0032963~collagen metabolic process	3	0.787402	0.0747522	P2RX7, HIF1A, MMP14	269	23	13588	6.58865	1	0.501307	73.2696
GOTERM_BP_FAT	GO:0050766~positive regulation of phagocytosis	3	0.787402	0.0747522	C3, FCER1G, MFGE8	269	23	13588	6.58865	1	0.501307	73.2696
GOTERM_BP_FAT	GO:0050830~defense response to Gram-positive bacterium	3	0.787402	0.0747522	P2RX7, LYZ2, FGR	269	23	13588	6.58865	1	0.501307	73.2696
GOTERM_BP_FAT	GO:0046631~alpha-beta T cell activation	3	0.787402	0.0747522	H2-M3, GADD45G, IRF1	269	23	13588	6.58865	1	0.501307	73.2696
GOTERM_BP_FAT	GO:0000165~MAPKKK cascade	6	1.5748	0.0750438	PTPRC, P2RX7, TNF, GADD45G, CD81, CD74	269	114	13588	2.65858	1	0.50099	73.4122
GOTERM_BP_FAT	GO:0000187~activation of MAPK activity	4	1.04987	0.0755855	PTPRC, P2RX7, CD81, CD74	269	50	13588	4.04104	1	0.501873	73.6755
GOTERM_BP_FAT	GO:0032940~secretion by cell	8	2.09974	0.0756539	LAT, P2RX7, PLEK, LY6E, STXBP1, FKBP1B, IRS1, CXCL10	269	186	13588	2.1726	1	0.500494	73.7085
GOTERM_BP_FAT	GO:0002526~acute inflammatory response	5	1.31234	0.0759722	REG3B, C3, C2, REG3G, TRF	269	81	13588	3.11809	1	0.500313	73.8618
GOTERM_BP_FAT	GO:0008285~negative regulation of cell proliferation	9	2.3622	0.0763054	TNF, PTGES, IFITM3, CD274, CD276, PLA2G2A, TGFB1, ETV4, SLFN2	269	224	13588	2.02954	1	0.500205	74.0214
GOTERM_BP_FAT	GO:0002639~positive regulation of immunoglobulin production	2	0.524934	0.0765978	CD37, SASH3	269	4	13588	25.2565	1	0.499907	74.1607
GOTERM_BP_FAT	GO:0002483~antigen processing and presentation of endogenous peptide antigen	2	0.524934	0.0765978	H2-M3, H2-Q6, H2-Q8	269	4	13588	25.2565	1	0.499907	74.1607
GOTERM_BP_FAT	GO:0019883~antigen processing and presentation of endogenous antigen	2	0.524934	0.0765978	H2-M3, H2-Q6, H2-Q8	269	4	13588	25.2565	1	0.499907	74.1607
GOTERM_BP_FAT	GO:0030501~positive regulation of bone mineralization	2	0.524934	0.0765978	P2RX7, CD276	269	4	13588	25.2565	1	0.499907	74.1607
GOTERM_BP_FAT	GO:0032020~ISG15-protein conjugation	2	0.524934	0.0765978	USP18, UBE2L6	269	4	13588	25.2565	1	0.499907	74.1607
GOTERM_BP_FAT	GO:0070169~positive regulation of biomineral formation	2	0.524934	0.0765978	P2RX7, CD276	269	4	13588	25.2565	1	0.499907	74.1607
GOTERM_BP_FAT	GO:0032753~positive regulation of interleukin-4 production	2	0.524934	0.0765978	CD3E, SASH3	269	4	13588	25.2565	1	0.499907	74.1607
GOTERM_BP_FAT	GO:0002428~antigen processing and presentation of peptide antigen via MHC class Ib	2	0.524934	0.0765978	H2-M3, H2-Q6, H2-Q8	269	4	13588	25.2565	1	0.499907	74.1607
GOTERM_BP_FAT	GO:0006915~apoptosis	15	3.93701	0.0771153	TNF, GZMA, PGLYRP1, LGALS12, GZMB, KHDC1A, TNFSF10, TMEM173, CASP4, CASP14, GADD45G, ZC3H12A, XAF1, APAF1, SRGN	269	465	13588	1.62945	1	0.500666	74.4055
GOTERM_BP_FAT	GO:0035295~tube development	10	2.62467	0.0783381	HIF1A, LAMA5, CXCR4, NOTCH4, ROBO2, CELSR1, APAF1, MMP14, TGFB1, ETV4	269	264	13588	1.91337	1	0.504692	74.9753
GOTERM_BP_FAT	GO:0045834~positive regulation of lipid metabolic process	3	0.787402	0.0805202	APOE, CD81, IRS1	269	24	13588	6.31413	1	0.513027	75.9627
GOTERM_BP_FAT	GO:0044259~multicellular organismal macromolecule metabolic process	3	0.787402	0.0805202	P2RX7, HIF1A, MMP14	269	24	13588	6.31413	1	0.513027	75.9627
GOTERM_BP_FAT	GO:0010647~positive regulation of cell communication	8	2.09974	0.0808224	CARD11, PTPRC, P2RX7, TNF, HIF1A, LYN, CD8A, CD3E	269	189	13588	2.13812	1	0.512732	76.0965
GOTERM_BP_FAT	GO:0030100~regulation of endocytosis	4	1.04987	0.0828694	C3, FCER1G, MFGE8, TGFB1	269	52	13588	3.88562	1	0.520245	76.9845
GOTERM_BP_FAT	GO:0055082~cellular chemical homeostasis	10	2.62467	0.0837847	PTPRC, P2RX7, HIF1A, APOE, NUCB2, CCR10, FKBP1B, TGFB1, TRF, CKB	269	268	13588	1.88481	1	0.522633	77.3715
GOTERM_BP_FAT	GO:0033043~regulation of organelle organization	7	1.83727	0.0845516	CORO1A, TNF, PLEK, CAPG, SPNA1, VILL, TGFB1	269	154	13588	2.29605	1	0.524342	77.691
GOTERM_BP_FAT	GO:0012501~programmed cell death	15	3.93701	0.0857895	TNF, GZMA, PGLYRP1, LGALS12, GZMB, KHDC1A, TNFSF10, TMEM173, CASP4, CASP14, GADD45G, ZC3H12A, XAF1, APAF1, SRGN	269	473	13588	1.60189	1	0.528072	78.1978
GOTERM_BP_FAT	GO:0030837~negative regulation of actin filament polymerization	3	0.787402	0.086421	CAPG, SPNA1, VILL	269	25	13588	6.06156	1	0.529148	78.4521
GOTERM_BP_FAT	GO:0051092~positive regulation of NF-kappaB transcription factor activity	3	0.787402	0.086421	TNF, ITGB2, TGFB1	269	25	13588	6.06156	1	0.529148	78.4521
GOTERM_BP_FAT	GO:0030278~regulation of ossification	4	1.04987	0.0866204	P2RX7, CD276, TGFB1, SRGN	269	53	13588	3.8123	1	0.528366	78.5319
GOTERM_BP_FAT	GO:0050730~regulation of peptidyl-tyrosine phosphorylation	4	1.04987	0.0866204	PTPRC, LYN, CD3E, CD81	269	53	13588	3.8123	1	0.528366	78.5319
GOTERM_BP_FAT	GO:0006959~humoral immune response	4	1.04987	0.0904422	TNF, C3, ANG4, C2	269	54	13588	3.7417	1	0.542842	80.0073
GOTERM_BP_FAT	GO:0050777~negative regulation of immune response	3	0.787402	0.092447	GPX2, PTPRC, TGFB1	269	26	13588	5.82842	1	0.549451	80.7426
GOTERM_BP_FAT	GO:0046635~positive regulation of alpha-beta T cell activation	3	0.787402	0.092447	PTPRC, CD3E, SASH3	269	26	13588	5.82842	1	0.549451	80.7426
GOTERM_BP_FAT	GO:0044236~multicellular organismal metabolic process	3	0.787402	0.092447	P2RX7, HIF1A, MMP14	269	26	13588	5.82842	1	0.549451	80.7426
GOTERM_BP_FAT	GO:0042541~hemoglobin biosynthetic process	2	0.524934	0.0948157	HIF1A, LYN	269	5	13588	20.2052	1	0.557381	81.5786
GOTERM_BP_FAT	GO:0046653~tetrahydrofolate metabolic process	2	0.524934	0.0948157	ALDH1L1, GCH1	269	5	13588	20.2052	1	0.557381	81.5786
GOTERM_BP_FAT	GO:0032609~interferon-gamma production	2	0.524934	0.0948157	IL18, GADD45G	269	5	13588	20.2052	1	0.557381	81.5786
GOTERM_BP_FAT	GO:0051279~regulation of release of sequestered calcium ion into cytosol	2	0.524934	0.0948157	FKBP1B, TGFB1	269	5	13588	20.2052	1	0.557381	81.5786
GOTERM_BP_FAT	GO:0060762~regulation of branching involved in mammary gland duct morphogenesis	2	0.524934	0.0948157	TGFB1, ETV4	269	5	13588	20.2052	1	0.557381	81.5786
GOTERM_BP_FAT	GO:0032060~bleb formation	2	0.524934	0.0948157	P2RX7, PRDX6	269	5	13588	20.2052	1	0.557381	81.5786
GOTERM_BP_FAT	GO:0048732~gland development	8	2.09974	0.0955307	TNF, LY6E, LAMA5, DUOX2, HOXD13, IRS1, TGFB1, ETV4	269	197	13588	2.05129	1	0.558596	81.8241
GOTERM_BP_FAT	GO:0010740~positive regulation of protein kinase cascade	5	1.31234	0.0960102	CARD11, PTPRC, P2RX7, TNF, LYN	269	88	13588	2.87006	1	0.558867	81.9871
GOTERM_BP_FAT	GO:0032680~regulation of tumor necrosis factor production	3	0.787402	0.0985912	FCER1G, SASH3, CD14	269	27	13588	5.61256	1	0.567347	82.8408
GOTERM_BP_FAT	GO:0050680~negative regulation of epithelial cell proliferation	3	0.787402	0.0985912	PLA2G2A, TGFB1, ETV4	269	27	13588	5.61256	1	0.567347	82.8408
GOTERM_BP_FAT	GO:0031333~negative regulation of protein complex assembly	3	0.787402	0.0985912	CAPG, SPNA1, VILL	269	27	13588	5.61256	1	0.567347	82.8408
GOTERM_BP_FAT	GO:0032272~negative regulation of protein polymerization	3	0.787402	0.0985912	CAPG, SPNA1, VILL	269	27	13588	5.61256	1	0.567347	82.8408
GOTERM_BP_FAT	GO:0060341~regulation of cellular localization	7	1.83727	0.0993495	P2RX7, TNF, FCER1G, CELSR1, FKBP1B, TGFB1, SRGN	269	161	13588	2.19622	1	0.568653	83.0843

## Sheet: GO_Colon_Down
Table S11: Transcripts that are consistently up- or down-regulated in the ileum or colon in the presence of microbiota and their GO enrichments
Category	Term	Count	%	PValue	Genes	List Total	Pop Hits	Pop Total	Fold Enrichment	Bonferroni	Benjamini	FDR
GOTERM_BP_FAT	GO:0055114~oxidation reduction	36	11.0429	5.81e-09	CYP2C66, CYP2U1, CYP2C65, ME3, SORD, CYP2D11, HSD17B13, CYP2J6, ADH5, UGDH, ALDH3A2, AKR1C13, ALDH1A1, FMO5, FAR2, RDH7, ALDH1A7, SARDH, GLRX, ADH6A, SUOX, CYP3A13, CYP3A11, DHRS11, QDPR, CYP4F14, CYP4B1, IYD, ABP1, CYP27A1, AKR1C18, AKR1C19, CYP4F16, TXNRD3, DPYD, HPGD	238	672	13588	3.05852	7.52e-06	7.52e-06	9.47e-06
GOTERM_BP_FAT	GO:0006814~sodium ion transport	12	3.68098	1.16e-05	SLC8A1, SLC5A4A, SLC17A4, SLC5A1, SLC9A2, SLC22A4, SLC13A1, 2010001E11RIK, SCNN1G, SLC10A2, SLC5A11, SLC34A2	238	125	13588	5.48087	0.0149648	0.00751062	0.0189998
GOTERM_BP_FAT	GO:0007623~circadian rhythm	7	2.14724	3.91e-05	CRY2, ALB, DBP, PER2, PER1, PER3, CRY1	238	37	13588	10.8013	0.0493289	0.016721	0.0637309
GOTERM_BP_FAT	GO:0015718~monocarboxylic acid transport	5	1.53374	0.000285	SLC26A6, SLC17A5, SLC10A2, SLC27A2, SLC27A4	238	19	13588	15.0243	0.308297	0.0880313	0.46344
GOTERM_BP_FAT	GO:0048511~rhythmic process	9	2.76074	0.000311	CRY2, CCRN4L, ALB, DBP, PER2, TEF, PER1, PER3, CRY1	238	98	13588	5.24318	0.331143	0.0772869	0.505562
GOTERM_BP_FAT	GO:0009991~response to extracellular stimulus	10	3.06748	0.000536	FOS, PPARA, SUOX, ABCG5, ALB, ALDOB, SLC22A3, FOSL1, LCT, ANGPTL4	238	133	13588	4.29266	0.50033	0.109199	0.870543
GOTERM_BP_FAT	GO:0008643~carbohydrate transport	7	2.14724	0.000602	SLC2A9, SLC17A5, SLC2A5, SLC5A4A, SLC5A1, 2010001E11RIK, SLC5A11	238	60	13588	6.66078	0.541727	0.105482	0.978523
GOTERM_BP_FAT	GO:0015698~inorganic anion transport	8	2.45399	0.000605	SLC26A3, ANK, GABRE, SLC26A6, P2RY4, SLC13A1, CLCN5, SLC34A2	238	83	13588	5.50289	0.543519	0.0933747	0.983412
GOTERM_BP_FAT	GO:0001523~retinoid metabolic process	5	1.53374	0.00132926	ALDH1A1, LRAT, RBP2, ADH5, ALDH1A7	238	28	13588	10.1951	0.821387	0.174192	2.14739
GOTERM_BP_FAT	GO:0016101~diterpenoid metabolic process	5	1.53374	0.00132926	ALDH1A1, LRAT, RBP2, ADH5, ALDH1A7	238	28	13588	10.1951	0.821387	0.174192	2.14739
GOTERM_BP_FAT	GO:0006721~terpenoid metabolic process	5	1.53374	0.00152106	ALDH1A1, LRAT, RBP2, ADH5, ALDH1A7	238	29	13588	9.84352	0.86072	0.178914	2.45364
GOTERM_BP_FAT	GO:0006811~ion transport	25	7.66871	0.00152502	FXYD4, SLC5A1, SLC9A2, KCNU1, TTYH3, ANK, P2RY4, SLC5A4A, SLC22A4, SLC22A3, SCNN1G, GABRE, SLC8A1, SLC10A2, SLC34A2, SLC26A3, SLC26A6, SLC17A4, SLC41A2, SLC13A1, SLC25A37, 2010001E11RIK, CACNA1E, SLC5A11, CLCN5	238	712	13588	2.00465	0.861434	0.164457	2.45996
GOTERM_BP_FAT	GO:0046942~carboxylic acid transport	8	2.45399	0.00171646	SLC26A6, SLC17A5, SLC6A20A, SLC7A8, SLC22A4, SLC10A2, SLC27A2, SLC27A4	238	99	13588	4.61353	0.891903	0.169223	2.76472
GOTERM_BP_FAT	GO:0015849~organic acid transport	8	2.45399	0.00181883	SLC26A6, SLC17A5, SLC6A20A, SLC7A8, SLC22A4, SLC10A2, SLC27A2, SLC27A4	238	100	13588	4.56739	0.905346	0.165855	2.92732
GOTERM_BP_FAT	GO:0006820~anion transport	9	2.76074	0.00199235	SLC26A3, ANK, GABRE, SLC26A6, P2RY4, SLC13A1, SLC10A2, CLCN5, SLC34A2	238	130	13588	3.95255	0.924428	0.168461	3.20236
GOTERM_BP_FAT	GO:0055085~transmembrane transport	18	5.52147	0.00295411	SLC2A9, SLC8A1, MFSD8, SLC5A1, SLC7A8, KCNU1, SLC26A3, SLC17A5, SLC2A5, SLC5A4A, SLC22A4, SLC13A1, SLC22A3, SLC25A37, CACNA1E, 2010001E11RIK, SLC46A3, CLCN5	238	460	13588	2.23405	0.978317	0.225406	4.71352
GOTERM_BP_FAT	GO:0006641~triglyceride metabolic process	5	1.53374	0.0034297	DGAT1, APOC3, AGPAT9, SLC22A4, MTTP	238	36	13588	7.92951	0.988311	0.242755	5.45258
GOTERM_BP_FAT	GO:0031667~response to nutrient levels	8	2.45399	0.00399844	PPARA, SUOX, ABCG5, ALB, ALDOB, SLC22A3, LCT, ANGPTL4	238	115	13588	3.97165	0.994419	0.263022	6.32933
GOTERM_BP_FAT	GO:0006869~lipid transport	8	2.45399	0.00482263	APOA4, ABCG5, OSBPL6, APOC3, NPC1L1, SLC27A2, SLC27A4, MTTP	238	119	13588	3.83815	0.99809	0.29376	7.58634
GOTERM_BP_FAT	GO:0006631~fatty acid metabolic process	10	3.06748	0.005022	FAR2, PPARA, ACSL1, EDN2, ACNAT1, EPHX2, SLC27A2, HPGD, GHR, SLC27A4	238	184	13588	3.10285	0.998526	0.290469	7.88802
GOTERM_BP_FAT	GO:0006639~acylglycerol metabolic process	5	1.53374	0.00653531	DGAT1, APOC3, AGPAT9, SLC22A4, MTTP	238	43	13588	6.63866	0.999795	0.345936	10.148
GOTERM_BP_FAT	GO:0015672~monovalent inorganic cation transport	13	3.98773	0.00696655	SLC8A1, SLC5A1, SLC9A2, SLC10A2, SLC34A2, KCNU1, SLC5A4A, SLC17A4, SLC22A4, SLC13A1, 2010001E11RIK, SCNN1G, SLC5A11	238	303	13588	2.44951	0.999883	0.350211	10.7824
GOTERM_BP_FAT	GO:0010876~lipid localization	8	2.45399	0.0071391	APOA4, ABCG5, OSBPL6, APOC3, NPC1L1, SLC27A2, SLC27A4, MTTP	238	128	13588	3.56828	0.999907	0.344096	11.035
GOTERM_BP_FAT	GO:0006662~glycerol ether metabolic process	5	1.53374	0.00767983	DGAT1, APOC3, AGPAT9, SLC22A4, MTTP	238	45	13588	6.3436	0.999954	0.352138	11.8225
GOTERM_BP_FAT	GO:0006638~neutral lipid metabolic process	5	1.53374	0.00767983	DGAT1, APOC3, AGPAT9, SLC22A4, MTTP	238	45	13588	6.3436	0.999954	0.352138	11.8225
GOTERM_BP_FAT	GO:0018904~organic ether metabolic process	5	1.53374	0.00963166	DGAT1, APOC3, AGPAT9, SLC22A4, MTTP	238	48	13588	5.94713	0.999996	0.406802	14.6107
GOTERM_BP_FAT	GO:0006720~isoprenoid metabolic process	5	1.53374	0.0103474	ALDH1A1, LRAT, RBP2, ADH5, ALDH1A7	238	49	13588	5.82576	0.999999	0.416546	15.6124
GOTERM_BP_FAT	GO:0042594~response to starvation	4	1.22699	0.013704	ALB, ALDOB, LCT, ANGPTL4	238	29	13588	7.87482	1	0.49706	20.1639
GOTERM_BP_FAT	GO:0006812~cation transport	17	5.21472	0.018566	SLC8A1, SLC5A1, SLC9A2, SLC10A2, SLC34A2, KCNU1, SLC5A4A, SLC17A4, SLC41A2, SLC22A4, SLC13A1, SLC22A3, SLC25A37, CACNA1E, 2010001E11RIK, SCNN1G, SLC5A11	238	515	13588	1.8846	1	0.592962	26.3498
GOTERM_BP_FAT	GO:0030001~metal ion transport	15	4.60123	0.0229348	SLC8A1, SLC5A1, SLC9A2, SLC10A2, SLC34A2, KCNU1, SLC5A4A, SLC17A4, SLC22A4, SLC13A1, SLC25A37, CACNA1E, 2010001E11RIK, SCNN1G, SLC5A11	238	442	13588	1.93753	1	0.658049	31.5217
GOTERM_BP_FAT	GO:0008272~sulfate transport	3	0.920245	0.0240132	SLC26A3, SLC26A6, SLC13A1	238	14	13588	12.2341	1	0.662233	32.7448
GOTERM_BP_FAT	GO:0010817~regulation of hormone levels	7	2.14724	0.0246627	ALDH1A1, DGAT1, LRAT, TBX3, AKR1C18, ALDH1A7, PCSK5	238	128	13588	3.12224	1	0.659709	33.4715
GOTERM_BP_FAT	GO:0046486~glycerolipid metabolic process	7	2.14724	0.0255028	DGAT1, LRAT, PGAP1, APOC3, AGPAT9, SLC22A4, MTTP	238	129	13588	3.09804	1	0.660126	34.4006
GOTERM_BP_FAT	GO:0001676~long-chain fatty acid metabolic process	3	0.920245	0.0273935	EPHX2, SLC27A2, SLC27A4	238	15	13588	11.4185	1	0.675038	36.4471
GOTERM_BP_FAT	GO:0019748~secondary metabolic process	5	1.53374	0.0323049	ALDH1A1, LRAT, RBP2, ADH5, ALDH1A7	238	69	13588	4.13713	1	0.724357	41.4867
GOTERM_BP_FAT	GO:0006766~vitamin metabolic process	5	1.53374	0.0323049	TPK1, ALDH1A1, LRAT, SLC22A4, ALDH1A7	238	69	13588	4.13713	1	0.724357	41.4867
GOTERM_BP_FAT	GO:0042760~very-long-chain fatty acid catabolic process	2	0.613497	0.0345808	SLC27A2, SLC27A4	238	2	13588	57.0924	1	0.738268	43.6926
GOTERM_BP_FAT	GO:0006081~cellular aldehyde metabolic process	3	0.920245	0.0346831	ADH5, ALDH1A7, ALDH3A2	238	17	13588	10.0751	1	0.729114	43.7899
GOTERM_BP_FAT	GO:0031668~cellular response to extracellular stimulus	4	1.22699	0.0434838	FOS, ALB, FOSL1, ANGPTL4	238	45	13588	5.07488	1	0.797949	51.5939
GOTERM_BP_FAT	GO:0045892~negative regulation of transcription, DNA-dependent	11	3.37423	0.0439625	CDKN1C, EGR1, HOXB4, TBX3, PRMT6, PER2, PER1, NOSTRIN, PER3, SOX6, ZBTB16	238	308	13588	2.03902	1	0.792689	51.9877
GOTERM_BP_FAT	GO:0003013~circulatory system process	6	1.84049	0.0448291	CALCB, EDN3, NTS, EDN2, EPHX2, ADH5	238	111	13588	3.08608	1	0.7905	52.6931
GOTERM_BP_FAT	GO:0008015~blood circulation	6	1.84049	0.0448291	CALCB, EDN3, NTS, EDN2, EPHX2, ADH5	238	111	13588	3.08608	1	0.7905	52.6931
GOTERM_BP_FAT	GO:0051253~negative regulation of RNA metabolic process	11	3.37423	0.0459746	CDKN1C, EGR1, HOXB4, TBX3, PRMT6, PER2, PER1, NOSTRIN, PER3, SOX6, ZBTB16	238	310	13588	2.02586	1	0.790451	53.6105
GOTERM_BP_FAT	GO:0060429~epithelium development	10	3.06748	0.0483462	ALDH1A1, WNT5A, COBL, HOXB4, TBX3, PRLR, UPK1A, CFL1, GJA1, FZD3	238	271	13588	2.10673	1	0.798971	55.4571
GOTERM_BP_FAT	GO:0048598~embryonic morphogenesis	12	3.68098	0.0504832	ALDH1A1, WNT5A, COBL, HOXB4, OSR2, TBX3, CFL1, UGDH, SOBP, FZD3, ZBTB16, CML5	238	359	13588	1.90838	1	0.805279	57.0617
GOTERM_BP_FAT	GO:0050880~regulation of blood vessel size	4	1.22699	0.0510492	CALCB, EDN3, NTS, EDN2	238	48	13588	4.7577	1	0.801232	57.4775
GOTERM_BP_FAT	GO:0035150~regulation of tube size	4	1.22699	0.0510492	CALCB, EDN3, NTS, EDN2	238	48	13588	4.7577	1	0.801232	57.4775
GOTERM_BP_FAT	GO:0010553~negative regulation of specific transcription from RNA polymerase II promoter	3	0.920245	0.0511833	PER2, PER1, PER3	238	21	13588	8.15606	1	0.794498	57.5755
GOTERM_BP_FAT	GO:0007567~parturition	2	0.613497	0.051422	AKR1C18, HPGD	238	3	13588	38.0616	1	0.788545	57.7493
GOTERM_BP_FAT	GO:0003018~vascular process in circulatory system	4	1.22699	0.0564232	CALCB, EDN3, NTS, EDN2	238	50	13588	4.56739	1	0.812006	61.2416
GOTERM_BP_FAT	GO:0032582~negative regulation of gene-specific transcription	3	0.920245	0.0602891	PER2, PER1, PER3	238	23	13588	7.44684	1	0.826328	63.7533
GOTERM_BP_FAT	GO:0001501~skeletal system development	10	3.06748	0.0619465	WNT5A, BMP3, HOXB4, OSR2, BMP1, TBX3, SOX6, ZBTB16, PCSK5, ERCC2	238	285	13588	2.00324	1	0.828295	64.7827
GOTERM_BP_FAT	GO:0034754~cellular hormone metabolic process	4	1.22699	0.0620547	ALDH1A1, LRAT, AKR1C18, ALDH1A7	238	52	13588	4.39173	1	0.822429	64.8489
GOTERM_BP_FAT	GO:0010038~response to metal ion	4	1.22699	0.0649648	ALB, ALDOB, MT1, LCT	238	53	13588	4.30886	1	0.830557	66.5871
GOTERM_BP_FAT	GO:0043009~chordate embryonic development	13	3.98773	0.0655378	COBL, TBX3, PTPRR, GJA1, FZD3, SLC34A2, HOXB4, OSR2, CFL1, HBEGF, PLCD1, PCSK5, ERCC2	238	421	13588	1.76295	1	0.827198	66.9197
GOTERM_BP_FAT	GO:0042493~response to drug	5	1.53374	0.0677985	ALDH1A1, ABP1, FOS, ABCG5, LCT	238	88	13588	3.24389	1	0.831815	68.2018
GOTERM_BP_FAT	GO:0006526~arginine biosynthetic process	2	0.613497	0.0679706	NAGS, OTC	238	4	13588	28.5462	1	0.826747	68.2975
GOTERM_BP_FAT	GO:0009792~embryonic development ending in birth or egg hatching	13	3.98773	0.0690669	COBL, TBX3, PTPRR, GJA1, FZD3, SLC34A2, HOXB4, OSR2, CFL1, HBEGF, PLCD1, PCSK5, ERCC2	238	425	13588	1.74636	1	0.825998	68.9006
GOTERM_BP_FAT	GO:0019400~alditol metabolic process	3	0.920245	0.0699003	SORD, DAK, GDPD2	238	25	13588	6.85109	1	0.82409	69.3519
GOTERM_BP_FAT	GO:0042445~hormone metabolic process	5	1.53374	0.0723682	ALDH1A1, LRAT, AKR1C18, ALDH1A7, PCSK5	238	90	13588	3.1718	1	0.829453	70.6524
GOTERM_BP_FAT	GO:0044242~cellular lipid catabolic process	4	1.22699	0.0740628	ENPP7, APOC3, SLC27A2, SLC27A4	238	56	13588	4.07803	1	0.831268	71.5152
GOTERM_BP_FAT	GO:0006776~vitamin A metabolic process	3	0.920245	0.0748811	ALDH1A1, LRAT, ALDH1A7	238	26	13588	6.58759	1	0.829379	71.9233
GOTERM_BP_FAT	GO:0035239~tube morphogenesis	7	2.14724	0.0792742	WNT5A, COBL, TBX3, CFL1, GJA1, FZD3, CXCL12	238	171	13588	2.33712	1	0.841833	74.0218
GOTERM_BP_FAT	GO:0002009~morphogenesis of an epithelium	7	2.14724	0.0830436	ALDH1A1, WNT5A, COBL, HOXB4, TBX3, CFL1, FZD3	238	173	13588	2.3101	1	0.850863	75.7041
GOTERM_BP_FAT	GO:0016042~lipid catabolic process	6	1.84049	0.0854041	ENPP7, AKR1C18, APOC3, PLCD1, SLC27A2, SLC27A4	238	134	13588	2.55638	1	0.854388	76.7049
GOTERM_BP_FAT	GO:0006821~chloride transport	4	1.22699	0.0903947	GABRE, SLC26A6, P2RY4, CLCN5	238	61	13588	3.74377	1	0.866196	78.6949
