# Supplementary material for: Microbiota modulate transcription in the intestinal epithelium without remodeling the accessible chromatin landscape
Source: HighWire-hosted journal article supplement (doi:10.1101/gr.165845.113), 2014-06-24
Supplement: Supplemental_TableS12.xlsx [file Supplemental_TableS12.xlsx]

## Sheet: ileum_up
TABLE S12: Genome coordinates of DHS within the regulatory domain of genes consistently up- or down-regulated in the ileum or colon of colonized vs. germ-free mice.
chrom	start	stop	category
chr1	36794041	36794604	ileum_up
chr1	36800915	36802006	ileum_up
chr1	36825208	36825844	ileum_up
chr1	36827182	36829956	ileum_up
chr1	36841380	36843392	ileum_up
chr1	36844884	36845691	ileum_up
chr1	36866988	36867924	ileum_up
chr1	36897512	36898512	ileum_up
chr1	36901348	36902459	ileum_up
chr1	36976513	36978011	ileum_up
chr1	36982604	36984004	ileum_up
chr1	36993383	36993908	ileum_up
chr1	36995140	36997624	ileum_up
chr1	40522163	40523163	ileum_up
chr1	45851612	45853436	ileum_up
chr1	45881958	45882430	ileum_up
chr1	45930296	45930897	ileum_up
chr1	45932832	45934085	ileum_up
chr1	45934279	45934782	ileum_up
chr1	45961089	45962835	ileum_up
chr1	45981816	45983716	ileum_up
chr1	46063508	46064271	ileum_up
chr1	46075191	46075659	ileum_up
chr1	52001546	52002106	ileum_up
chr1	52053081	52054492	ileum_up
chr1	52157139	52157777	ileum_up
chr1	52163874	52164689	ileum_up
chr1	52169943	52171125	ileum_up
chr1	52175363	52177825	ileum_up
chr1	52198112	52199437	ileum_up
chr1	52203046	52204219	ileum_up
chr1	52206061	52207398	ileum_up
chr1	52225879	52229285	ileum_up
chr1	52288498	52290722	ileum_up
chr1	54656535	54657827	ileum_up
chr1	54658148	54659151	ileum_up
chr1	54668620	54669878	ileum_up
chr1	54709803	54710405	ileum_up
chr1	54717404	54718284	ileum_up
chr1	54722517	54723293	ileum_up
chr1	54804523	54805152	ileum_up
chr1	54814090	54814559	ileum_up
chr1	54828038	54828818	ileum_up
chr1	54889200	54890340	ileum_up
chr1	54910220	54911462	ileum_up
chr1	54954636	54957716	ileum_up
chr1	54978526	54979792	ileum_up
chr1	54981780	54983954	ileum_up
chr1	55082231	55084726	ileum_up
chr1	69373221	69373803	ileum_up
chr1	69460491	69461138	ileum_up
chr1	69462866	69463411	ileum_up
chr1	69470437	69471003	ileum_up
chr1	69503476	69505023	ileum_up
chr1	69515665	69516666	ileum_up
chr1	69517104	69518626	ileum_up
chr1	69637868	69638838	ileum_up
chr1	69701676	69703337	ileum_up
chr1	69732334	69734749	ileum_up
chr1	69735496	69736092	ileum_up
chr1	69833203	69833849	ileum_up
chr1	69836816	69837313	ileum_up
chr1	71698771	71700985	ileum_up
chr1	71883474	71885032	ileum_up
chr1	72170025	72170795	ileum_up
chr1	72188358	72189046	ileum_up
chr1	72218331	72221759	ileum_up
chr1	72229007	72230755	ileum_up
chr1	72232299	72233670	ileum_up
chr1	72241686	72245064	ileum_up
chr1	72256720	72259250	ileum_up
chr1	83054765	83055731	ileum_up
chr1	83061331	83061988	ileum_up
chr1	83065341	83066209	ileum_up
chr1	83072686	83073196	ileum_up
chr1	83092675	83094042	ileum_up
chr1	83101948	83102543	ileum_up
chr1	83103784	83104562	ileum_up
chr1	83107439	83108810	ileum_up
chr1	83112928	83114376	ileum_up
chr1	83142878	83144085	ileum_up
chr1	83146725	83147209	ileum_up
chr1	87500579	87508841	ileum_up
chr1	87508950	87533977	ileum_up
chr1	87543109	87550087	ileum_up
chr1	87599763	87600796	ileum_up
chr1	87603143	87604099	ileum_up
chr1	87620770	87621632	ileum_up
chr1	87790443	87795538	ileum_up
chr1	87831180	87834094	ileum_up
chr1	87847110	87847629	ileum_up
chr1	87853992	87858050	ileum_up
chr1	87870729	87872057	ileum_up
chr1	87877859	87880180	ileum_up
chr1	87903633	87904884	ileum_up
chr1	87912324	87912820	ileum_up
chr1	88071829	88073430	ileum_up
chr1	88075100	88076281	ileum_up
chr1	88077622	88080963	ileum_up
chr1	88110385	88111549	ileum_up
chr1	88144202	88145372	ileum_up
chr1	88165232	88166834	ileum_up
chr1	88167888	88169396	ileum_up
chr1	88174643	88175464	ileum_up
chr1	88177780	88179355	ileum_up
chr1	88183807	88184752	ileum_up
chr1	88196784	88202038	ileum_up
chr1	88202352	88206551	ileum_up
chr1	88208822	88209486	ileum_up
chr1	88235916	88236507	ileum_up
chr1	88254634	88257566	ileum_up
chr1	89486167	89488124	ileum_up
chr1	89501320	89506412	ileum_up
chr1	89519335	89520953	ileum_up
chr1	89527993	89528645	ileum_up
chr1	89547053	89548116	ileum_up
chr1	89616283	89619160	ileum_up
chr1	89632731	89634291	ileum_up
chr1	89909782	89911163	ileum_up
chr1	89914840	89915926	ileum_up
chr1	89972377	89973006	ileum_up
chr1	89982337	89983195	ileum_up
chr1	89990524	89992672	ileum_up
chr1	90000641	90001221	ileum_up
chr1	90002162	90002781	ileum_up
chr1	90005466	90006142	ileum_up
chr1	90016852	90017736	ileum_up
chr1	90026778	90027296	ileum_up
chr1	90036889	90037598	ileum_up
chr1	90040562	90041459	ileum_up
chr1	90082741	90083769	ileum_up
chr1	90084942	90085653	ileum_up
chr1	90088069	90088654	ileum_up
chr1	90101776	90102631	ileum_up
chr1	90103230	90104120	ileum_up
chr1	90104966	90105708	ileum_up
chr1	97209463	97211326	ileum_up
chr1	97348338	97348845	ileum_up
chr1	132627620	132631649	ileum_up
chr1	132633872	132634728	ileum_up
chr1	132635166	132635917	ileum_up
chr1	132636165	132638471	ileum_up
chr1	132641691	132642937	ileum_up
chr1	132655992	132656930	ileum_up
chr1	132657609	132658605	ileum_up
chr1	132660256	132661481	ileum_up
chr1	132666943	132668069	ileum_up
chr1	132680583	132681077	ileum_up
chr1	132683461	132684088	ileum_up
chr1	132693239	132695780	ileum_up
chr1	132716233	132719457	ileum_up
chr1	132722456	132724989	ileum_up
chr1	132726220	132727529	ileum_up
chr1	132727688	132730890	ileum_up
chr1	133049133	133051099	ileum_up
chr1	133051947	133052709	ileum_up
chr1	133076089	133079523	ileum_up
chr1	133080772	133081588	ileum_up
chr1	133088671	133091250	ileum_up
chr1	133094740	133098749	ileum_up
chr1	133109461	133110430	ileum_up
chr1	133123824	133125519	ileum_up
chr1	133134743	133138808	ileum_up
chr1	133139120	133143888	ileum_up
chr1	133165608	133168992	ileum_up
chr1	133170917	133173912	ileum_up
chr1	133174539	133177906	ileum_up
chr1	133901964	133906908	ileum_up
chr1	133942622	133943629	ileum_up
chr1	133949906	133953525	ileum_up
chr1	133955053	133956473	ileum_up
chr1	133956901	133959659	ileum_up
chr1	133963412	133965325	ileum_up
chr1	133971826	133972877	ileum_up
chr1	133981276	133982912	ileum_up
chr1	133991870	133993624	ileum_up
chr1	134009556	134014212	ileum_up
chr1	134017609	134018669	ileum_up
chr1	134021652	134023374	ileum_up
chr1	134029564	134031200	ileum_up
chr1	134032929	134038174	ileum_up
chr1	137019796	137032169	ileum_up
chr1	137032552	137034464	ileum_up
chr1	137037016	137037723	ileum_up
chr1	139090969	139092607	ileum_up
chr1	139100004	139100523	ileum_up
chr1	139109711	139110863	ileum_up
chr1	139121905	139122585	ileum_up
chr1	139794713	139795783	ileum_up
chr1	139824437	139824968	ileum_up
chr1	139887909	139888443	ileum_up
chr1	139892587	139893148	ileum_up
chr1	139940359	139941551	ileum_up
chr1	146253614	146254497	ileum_up
chr1	163562101	163562650	ileum_up
chr1	163656163	163658005	ileum_up
chr1	163678063	163679725	ileum_up
chr1	163680401	163681973	ileum_up
chr1	163695896	163698109	ileum_up
chr1	163805635	163808302	ileum_up
chr1	167571396	167573664	ileum_up
chr1	167588050	167589789	ileum_up
chr1	167634751	167639401	ileum_up
chr1	167666061	167666895	ileum_up
chr1	167692904	167695587	ileum_up
chr1	167701327	167703781	ileum_up
chr1	167705657	167706613	ileum_up
chr1	167709935	167711827	ileum_up
chr1	167770699	167771608	ileum_up
chr1	167772472	167776782	ileum_up
chr1	167778610	167781860	ileum_up
chr1	167781963	167784579	ileum_up
chr1	167915237	167915837	ileum_up
chr1	167925480	167926773	ileum_up
chr1	167929542	167930255	ileum_up
chr1	167930386	167934004	ileum_up
chr1	172185085	172186179	ileum_up
chr1	172224145	172226493	ileum_up
chr1	173167768	173169176	ileum_up
chr1	173299444	173305306	ileum_up
chr1	173309731	173310761	ileum_up
chr1	173494235	173494902	ileum_up
chr1	173496777	173497483	ileum_up
chr1	173745766	173746334	ileum_up
chr1	175885708	175886741	ileum_up
chr1	178748061	178749336	ileum_up
chr1	178757535	178758182	ileum_up
chr1	178765557	178766722	ileum_up
chr1	178791995	178792725	ileum_up
chr1	178896817	178898040	ileum_up
chr1	178920878	178921877	ileum_up
chr1	178924824	178926629	ileum_up
chr1	178926691	178930530	ileum_up
chr1	178933796	178934954	ileum_up
chr1	178942791	178945459	ileum_up
chr1	178955942	178957078	ileum_up
chr1	178958640	178959887	ileum_up
chr1	178975909	178976442	ileum_up
chr1	179040736	179041472	ileum_up
chr1	179187202	179189650	ileum_up
chr1	179268125	179269562	ileum_up
chr1	187254969	187256797	ileum_up
chr1	187272125	187274522	ileum_up
chr1	187277955	187280748	ileum_up
chr1	187293008	187294440	ileum_up
chr1	187321650	187322730	ileum_up
chr1	187325806	187326981	ileum_up
chr1	187332678	187333576	ileum_up
chr1	187339312	187341844	ileum_up
chr1	187434361	187435869	ileum_up
chr1	187437968	187438910	ileum_up
chr1	187439605	187441048	ileum_up
chr1	187505656	187506864	ileum_up
chr1	187598286	187599710	ileum_up
chr1	187647977	187648451	ileum_up
chr1	187940026	187941637	ileum_up
chr1	192994006	192995372	ileum_up
chr1	193000751	193011329	ileum_up
chr1	193013667	193014459	ileum_up
chr1	193016910	193018556	ileum_up
chr1	193019711	193020459	ileum_up
chr1	193027299	193027895	ileum_up
chr1	193039844	193040887	ileum_up
chr1	193047355	193049902	ileum_up
chr1	193059711	193060890	ileum_up
chr1	193079860	193082280	ileum_up
chr1	193087057	193088157	ileum_up
chr1	193091624	193092309	ileum_up
chr1	193099183	193100427	ileum_up
chr1	193101170	193102711	ileum_up
chr1	193106285	193109441	ileum_up
chr1	193111628	193113431	ileum_up
chr1	193116141	193117594	ileum_up
chr1	193129330	193129965	ileum_up
chr1	193135951	193137544	ileum_up
chr1	193644399	193646606	ileum_up
chr1	193658436	193659402	ileum_up
chr1	193660011	193662302	ileum_up
chr1	193662713	193664137	ileum_up
chr1	193664488	193666074	ileum_up
chr1	193667096	193667786	ileum_up
chr1	193670258	193671288	ileum_up
chr1	193673772	193676987	ileum_up
chr1	193678945	193680055	ileum_up
chr1	193697811	193700484	ileum_up
chr1	193703747	193705808	ileum_up
chr1	193715517	193716729	ileum_up
chr1	193717862	193718966	ileum_up
chr1	193729519	193731971	ileum_up
chr1	193734528	193734954	ileum_up
chr1	193738114	193739114	ileum_up
chr1	193741981	193743713	ileum_up
chr1	193748191	193748960	ileum_up
chr1	193768664	193772011	ileum_up
chr1	193778181	193781500	ileum_up
chr1	193786463	193789492	ileum_up
chr1	194978278	194980984	ileum_up
chr1	194981191	194983683	ileum_up
chr1	194985402	194987114	ileum_up
chr1	194995485	194996666	ileum_up
chr1	194999107	195001449	ileum_up
chr1	195004231	195005764	ileum_up
chr1	195006851	195008567	ileum_up
chr1	195014290	195016798	ileum_up
chr1	195023926	195025749	ileum_up
chr1	195034078	195034867	ileum_up
chr10	38889532	38892317	ileum_up
chr10	38893780	38895139	ileum_up
chr10	38959294	38960500	ileum_up
chr10	39088749	39091701	ileum_up
chr10	39149969	39151473	ileum_up
chr10	39152140	39153668	ileum_up
chr10	39165565	39166147	ileum_up
chr10	39191228	39193222	ileum_up
chr10	39209803	39211457	ileum_up
chr10	39239638	39240769	ileum_up
chr10	39253559	39256615	ileum_up
chr10	41169036	41172365	ileum_up
chr10	41192765	41195479	ileum_up
chr10	41195631	41200491	ileum_up
chr10	43986150	43989428	ileum_up
chr10	44023944	44024554	ileum_up
chr10	44099946	44101888	ileum_up
chr10	44138768	44140724	ileum_up
chr10	44146288	44146695	ileum_up
chr10	44147060	44149048	ileum_up
chr10	44151295	44152106	ileum_up
chr10	44166018	44168596	ileum_up
chr10	44174237	44175975	ileum_up
chr10	44178096	44180372	ileum_up
chr10	44193936	44194748	ileum_up
chr10	44196171	44197580	ileum_up
chr10	44200736	44201735	ileum_up
chr10	44246527	44250209	ileum_up
chr10	44421734	44423100	ileum_up
chr10	44435132	44436513	ileum_up
chr10	44453182	44453895	ileum_up
chr10	44463990	44464455	ileum_up
chr10	44474919	44476030	ileum_up
chr10	44565961	44567287	ileum_up
chr10	44580869	44583289	ileum_up
chr10	44583652	44585432	ileum_up
chr10	44624090	44624811	ileum_up
chr10	44633406	44634520	ileum_up
chr10	44635471	44636060	ileum_up
chr10	44640609	44641282	ileum_up
chr10	44719724	44721573	ileum_up
chr10	44722259	44722872	ileum_up
chr10	44737087	44738371	ileum_up
chr10	44739073	44739997	ileum_up
chr10	44764959	44765666	ileum_up
chr10	44767756	44769300	ileum_up
chr10	44770649	44771497	ileum_up
chr10	57513485	57516411	ileum_up
chr10	57567811	57568613	ileum_up
chr10	57683288	57704068	ileum_up
chr10	59739747	59745980	ileum_up
chr10	59752671	59754050	ileum_up
chr10	59764437	59769201	ileum_up
chr10	59808628	59816278	ileum_up
chr10	59864770	59879526	ileum_up
chr10	59880414	59881976	ileum_up
chr10	59917594	59918981	ileum_up
chr10	59986061	59989449	ileum_up
chr10	59992961	60000107	ileum_up
chr10	60054817	60060969	ileum_up
chr10	60062977	60066151	ileum_up
chr10	60145633	60152485	ileum_up
chr10	61962792	61963386	ileum_up
chr10	61983507	61986021	ileum_up
chr10	61991089	61991795	ileum_up
chr10	62012085	62013317	ileum_up
chr10	75335207	75336192	ileum_up
chr10	75344007	75346336	ileum_up
chr10	75355413	75357995	ileum_up
chr10	75359705	75362219	ileum_up
chr10	76991000	76993700	ileum_up
chr10	77005755	77006791	ileum_up
chr10	77028339	77030107	ileum_up
chr10	77032578	77033808	ileum_up
chr10	77037202	77037882	ileum_up
chr10	79381731	79384834	ileum_up
chr10	79387762	79391349	ileum_up
chr10	79395151	79397703	ileum_up
chr10	79397836	79402281	ileum_up
chr10	79407206	79410866	ileum_up
chr10	79445237	79448211	ileum_up
chr10	79448355	79449367	ileum_up
chr10	79449626	79450331	ileum_up
chr10	79450604	79453045	ileum_up
chr10	79458727	79461980	ileum_up
chr10	79475981	79480908	ileum_up
chr10	79481298	79484437	ileum_up
chr10	79485266	79489403	ileum_up
chr10	79489748	79492343	ileum_up
chr10	79494826	79497201	ileum_up
chr10	83913345	83914097	ileum_up
chr10	83950673	83951745	ileum_up
chr10	83976316	83977386	ileum_up
chr10	83977585	83981270	ileum_up
chr10	83994084	83998937	ileum_up
chr10	84007567	84008633	ileum_up
chr10	84025184	84026284	ileum_up
chr10	89659348	89660210	ileum_up
chr10	89724891	89726286	ileum_up
chr10	89818979	89820922	ileum_up
chr10	89836003	89836854	ileum_up
chr10	90190329	90192016	ileum_up
chr10	90291402	90292774	ileum_up
chr10	90302205	90303156	ileum_up
chr10	90431974	90433663	ileum_up
chr10	90444218	90445368	ileum_up
chr10	90494709	90495842	ileum_up
chr10	90496437	90497213	ileum_up
chr10	90501341	90502276	ileum_up
chr10	90504913	90505516	ileum_up
chr10	90522529	90523008	ileum_up
chr10	90523409	90524059	ileum_up
chr10	90524913	90525649	ileum_up
chr10	90544605	90546369	ileum_up
chr10	98573727	98574446	ileum_up
chr10	98576624	98577708	ileum_up
chr10	98579850	98582013	ileum_up
chr10	98588941	98590958	ileum_up
chr10	98594760	98596260	ileum_up
chr10	98598697	98599673	ileum_up
chr10	98627523	98628990	ileum_up
chr10	98651694	98652255	ileum_up
chr10	98656835	98657800	ileum_up
chr10	98664457	98665507	ileum_up
chr10	98666312	98667615	ileum_up
chr10	98673625	98674885	ileum_up
chr10	98684407	98685868	ileum_up
chr10	98688997	98690160	ileum_up
chr10	98699908	98700626	ileum_up
chr10	98706010	98708058	ileum_up
chr10	98709200	98710669	ileum_up
chr10	98715945	98716541	ileum_up
chr10	98723667	98728301	ileum_up
chr10	98732923	98734344	ileum_up
chr10	98755627	98756188	ileum_up
chr10	98760331	98762173	ileum_up
chr10	98815730	98817521	ileum_up
chr10	98841551	98842257	ileum_up
chr10	98922267	98923230	ileum_up
chr10	98923437	98924654	ileum_up
chr10	98974233	98974969	ileum_up
chr10	99036411	99037200	ileum_up
chr10	99039795	99040382	ileum_up
chr10	99061922	99062372	ileum_up
chr10	99078338	99078890	ileum_up
chr10	99081964	99082816	ileum_up
chr10	99094831	99095535	ileum_up
chr10	99104347	99105551	ileum_up
chr10	99161081	99161609	ileum_up
chr10	99188036	99188903	ileum_up
chr10	111409390	111410824	ileum_up
chr10	111414242	111415238	ileum_up
chr10	121976640	121977213	ileum_up
chr10	121981133	121981905	ileum_up
chr10	121990063	121990670	ileum_up
chr10	121996711	121997929	ileum_up
chr10	122115261	122118455	ileum_up
chr10	122120543	122121367	ileum_up
chr10	122122328	122122823	ileum_up
chr10	122133274	122134141	ileum_up
chr10	122163987	122164873	ileum_up
chr10	122168600	122169177	ileum_up
chr10	122171918	122173630	ileum_up
chr10	122213973	122214438	ileum_up
chr10	122231230	122232053	ileum_up
chr10	122239944	122242189	ileum_up
chr10	122244019	122244987	ileum_up
chr10	122304008	122305163	ileum_up
chr10	122306604	122309180	ileum_up
chr10	122323042	122324148	ileum_up
chr10	122346451	122349576	ileum_up
chr10	122349729	122350798	ileum_up
chr10	122376300	122377139	ileum_up
chr10	122378169	122378820	ileum_up
chr10	122421915	122424019	ileum_up
chr10	122424711	122425822	ileum_up
chr10	122469147	122469949	ileum_up
chr10	122485569	122486424	ileum_up
chr10	122488970	122489633	ileum_up
chr10	122490182	122491152	ileum_up
chr10	122508609	122509628	ileum_up
chr10	122512511	122514663	ileum_up
chr10	126761500	126762246	ileum_up
chr10	126762474	126766412	ileum_up
chr10	126774761	126779963	ileum_up
chr10	127336597	127337746	ileum_up
chr10	127338789	127339397	ileum_up
chr10	127341664	127342690	ileum_up
chr10	127355156	127356030	ileum_up
chr10	127359154	127359957	ileum_up
chr10	127373855	127374580	ileum_up
chr10	127382297	127383099	ileum_up
chr10	127391667	127392853	ileum_up
chr10	127393114	127393864	ileum_up
chr10	127405509	127406181	ileum_up
chr10	127406701	127407925	ileum_up
chr10	127433386	127434346	ileum_up
chr10	127435809	127436491	ileum_up
chr10	127440380	127440917	ileum_up
chr10	127441510	127443197	ileum_up
chr10	127445230	127445726	ileum_up
chr10	127706014	127708210	ileum_up
chr10	127717681	127719090	ileum_up
chr11	5785967	5787030	ileum_up
chr11	5791905	5793373	ileum_up
chr11	5794000	5799867	ileum_up
chr11	5800372	5803440	ileum_up
chr11	5812429	5814871	ileum_up
chr11	5819702	5820884	ileum_up
chr11	6389403	6390616	ileum_up
chr11	6402378	6403361	ileum_up
chr11	6404067	6405517	ileum_up
chr11	6427270	6429295	ileum_up
chr11	9015440	9016599	ileum_up
chr11	9016823	9020035	ileum_up
chr11	9020523	9021545	ileum_up
chr11	9034505	9037317	ileum_up
chr11	9048166	9049132	ileum_up
chr11	9053207	9054032	ileum_up
chr11	9056466	9056914	ileum_up
chr11	9058819	9059706	ileum_up
chr11	11584497	11586846	ileum_up
chr11	11688343	11689317	ileum_up
chr11	11694549	11695139	ileum_up
chr11	16879075	16879641	ileum_up
chr11	33901886	33903307	ileum_up
chr11	34444246	34445088	ileum_up
chr11	34628209	34628783	ileum_up
chr11	34645938	34648234	ileum_up
chr11	40546526	40548107	ileum_up
chr11	45793286	45794882	ileum_up
chr11	45865540	45866097	ileum_up
chr11	46088538	46089546	ileum_up
chr11	46124444	46126547	ileum_up
chr11	53548474	53549651	ileum_up
chr11	53550369	53551580	ileum_up
chr11	53570848	53572145	ileum_up
chr11	53572301	53573824	ileum_up
chr11	53575033	53579445	ileum_up
chr11	53582689	53585179	ileum_up
chr11	53587158	53588963	ileum_up
chr11	53591846	53594166	ileum_up
chr11	53607633	53609227	ileum_up
chr11	53609366	53612473	ileum_up
chr11	53616583	53618767	ileum_up
chr11	53632281	53634745	ileum_up
chr11	53652174	53655396	ileum_up
chr11	53662931	53663880	ileum_up
chr11	53665203	53665747	ileum_up
chr11	53670158	53673458	ileum_up
chr11	53687376	53689524	ileum_up
chr11	53698873	53699489	ileum_up
chr11	53703684	53705996	ileum_up
chr11	54900341	54901063	ileum_up
chr11	54906192	54907364	ileum_up
chr11	54910298	54912470	ileum_up
chr11	54932135	54932577	ileum_up
chr11	54939561	54940530	ileum_up
chr11	54941302	54942392	ileum_up
chr11	58011300	58013876	ileum_up
chr11	58190179	58194893	ileum_up
chr11	58215323	58216299	ileum_up
chr11	58221192	58222404	ileum_up
chr11	58230805	58231823	ileum_up
chr11	58233751	58235427	ileum_up
chr11	58237260	58237914	ileum_up
chr11	58240039	58241749	ileum_up
chr11	58418066	58419325	ileum_up
chr11	58426498	58428890	ileum_up
chr11	58430659	58433164	ileum_up
chr11	61425406	61426805	ileum_up
chr11	61433096	61434436	ileum_up
chr11	61442945	61443737	ileum_up
chr11	61447412	61452018	ileum_up
chr11	61455341	61455890	ileum_up
chr11	61456361	61459378	ileum_up
chr11	61461182	61462679	ileum_up
chr11	61463902	61464889	ileum_up
chr11	61475684	61476916	ileum_up
chr11	61477685	61486088	ileum_up
chr11	61486310	61491310	ileum_up
chr11	61492270	61493498	ileum_up
chr11	72860616	72863309	ileum_up
chr11	72897427	72899838	ileum_up
chr11	72930147	72931188	ileum_up
chr11	72944343	72946632	ileum_up
chr11	72949460	72952344	ileum_up
chr11	78639621	78642557	ileum_up
chr11	78651099	78652448	ileum_up
chr11	78660972	78663100	ileum_up
chr11	78663559	78666572	ileum_up
chr11	78669630	78670284	ileum_up
chr11	78690526	78691300	ileum_up
chr11	78691707	78694209	ileum_up
chr11	78699949	78701419	ileum_up
chr11	78709903	78710854	ileum_up
chr11	78717283	78717967	ileum_up
chr11	78718270	78718997	ileum_up
chr11	78733748	78739536	ileum_up
chr11	78769653	78770514	ileum_up
chr11	78778576	78779966	ileum_up
chr11	78780328	78782140	ileum_up
chr11	78785623	78787373	ileum_up
chr11	78793785	78795108	ileum_up
chr11	78795257	78799042	ileum_up
chr11	82728251	82729231	ileum_up
chr11	82764313	82766755	ileum_up
chr11	82773031	82773598	ileum_up
chr11	82784296	82785350	ileum_up
chr11	82803460	82805850	ileum_up
chr11	82871334	82871785	ileum_up
chr11	82876337	82881197	ileum_up
chr11	82891085	82892693	ileum_up
chr11	83347551	83349420	ileum_up
chr11	83353881	83355055	ileum_up
chr11	83369651	83371397	ileum_up
chr11	83385626	83386910	ileum_up
chr11	83446174	83446706	ileum_up
chr11	96910789	96914440	ileum_up
chr11	96924161	96925624	ileum_up
chr11	96927794	96932225	ileum_up
chr11	96943046	96945647	ileum_up
chr11	96945864	96946860	ileum_up
chr11	96958463	96960682	ileum_up
chr11	96962832	96963550	ileum_up
chr11	96975369	96977569	ileum_up
chr11	96984356	96986904	ileum_up
chr11	96986982	96990425	ileum_up
chr11	96997055	97002557	ileum_up
chr11	97005854	97014617	ileum_up
chr11	98306606	98312807	ileum_up
chr11	98317760	98321829	ileum_up
chr11	98331097	98332688	ileum_up
chr11	98406638	98407616	ileum_up
chr11	98411893	98413178	ileum_up
chr11	100551247	100555483	ileum_up
chr11	100555783	100556796	ileum_up
chr11	100562315	100566686	ileum_up
chr11	103000803	103004689	ileum_up
chr11	103019533	103021272	ileum_up
chr11	103029808	103035516	ileum_up
chr11	103042471	103044564	ileum_up
chr11	103045295	103047345	ileum_up
chr11	103053031	103064014	ileum_up
chr11	105962030	105962547	ileum_up
chr11	105995898	105997027	ileum_up
chr11	106012317	106013075	ileum_up
chr11	106019293	106023272	ileum_up
chr11	106028426	106029254	ileum_up
chr11	106172387	106176208	ileum_up
chr11	106184872	106190331	ileum_up
chr11	117738342	117740971	ileum_up
chr11	117742715	117744892	ileum_up
chr11	117749291	117753104	ileum_up
chr11	117772058	117775029	ileum_up
chr11	117775225	117776672	ileum_up
chr11	117790172	117792794	ileum_up
chr11	117792930	117794859	ileum_up
chr11	117795094	117796598	ileum_up
chr11	117796784	117798422	ileum_up
chr11	117807618	117808871	ileum_up
chr11	117810286	117811614	ileum_up
chr11	117823526	117826386	ileum_up
chr11	117827569	117832838	ileum_up
chr11	120799443	120801315	ileum_up
chr11	120802236	120802757	ileum_up
chr11	120809329	120814145	ileum_up
chr11	120815734	120821423	ileum_up
chr11	120826725	120827313	ileum_up
chr11	120834276	120835779	ileum_up
chr11	120845675	120846705	ileum_up
chr11	120850708	120855307	ileum_up
chr11	120875627	120877091	ileum_up
chr11	120878823	120879830	ileum_up
chr11	120902317	120903187	ileum_up
chr11	120912972	120914685	ileum_up
chr11	120914767	120915738	ileum_up
chr11	120917383	120920759	ileum_up
chr11	120922739	120923283	ileum_up
chr12	32753431	32753906	ileum_up
chr12	32771619	32772467	ileum_up
chr12	32829249	32829838	ileum_up
chr12	32870824	32873332	ileum_up
chr12	32874969	32875559	ileum_up
chr12	32892919	32894310	ileum_up
chr12	32930556	32931225	ileum_up
chr12	32976101	32978157	ileum_up
chr12	32983891	32985278	ileum_up
chr12	32991174	32993159	ileum_up
chr12	33028111	33028895	ileum_up
chr12	33033195	33033849	ileum_up
chr12	74655091	74655684	ileum_up
chr12	74684455	74687259	ileum_up
chr12	74718459	74719315	ileum_up
chr12	74733331	74734384	ileum_up
chr12	74806015	74807132	ileum_up
chr12	74809353	74810440	ileum_up
chr12	74831530	74833092	ileum_up
chr12	74839722	74842140	ileum_up
chr12	74856432	74857429	ileum_up
chr12	74875883	74877951	ileum_up
chr12	74879546	74882251	ileum_up
chr12	74883370	74884020	ileum_up
chr12	74891316	74892806	ileum_up
chr12	74894166	74895871	ileum_up
chr12	74932303	74933343	ileum_up
chr12	74936869	74937620	ileum_up
chr12	74939119	74940378	ileum_up
chr12	74942683	74943868	ileum_up
chr12	74947484	74948177	ileum_up
chr12	74954155	74954958	ileum_up
chr12	74974566	74975212	ileum_up
chr12	74981292	74981827	ileum_up
chr12	74984472	74986906	ileum_up
chr12	74993479	74994048	ileum_up
chr12	74999100	74999857	ileum_up
chr12	77866158	77867730	ileum_up
chr12	77878829	77879960	ileum_up
chr12	77892882	77894104	ileum_up
chr12	77894264	77901683	ileum_up
chr12	77904211	77905490	ileum_up
chr12	77905904	77907867	ileum_up
chr12	77921097	77924487	ileum_up
chr12	102016392	102019045	ileum_up
chr12	102023295	102024052	ileum_up
chr12	102027945	102028782	ileum_up
chr12	102032470	102035060	ileum_up
chr12	102067088	102068175	ileum_up
chr12	102068853	102070166	ileum_up
chr12	102076678	102078610	ileum_up
chr12	102079150	102080032	ileum_up
chr12	102087356	102088193	ileum_up
chr12	102095699	102096589	ileum_up
chr12	102100329	102101969	ileum_up
chr12	102120332	102122247	ileum_up
chr12	102136250	102139088	ileum_up
chr12	102143864	102149796	ileum_up
chr12	102164127	102165152	ileum_up
chr12	102172366	102176592	ileum_up
chr12	102189541	102191835	ileum_up
chr12	102195728	102198003	ileum_up
chr12	102219743	102221779	ileum_up
chr12	102233665	102238503	ileum_up
chr12	102240883	102242546	ileum_up
chr12	102248188	102249729	ileum_up
chr12	102250195	102251902	ileum_up
chr12	102252077	102255672	ileum_up
chr12	102257744	102258640	ileum_up
chr12	102262654	102264493	ileum_up
chr12	102264569	102268379	ileum_up
chr12	102956047	102957692	ileum_up
chr12	102988794	102990870	ileum_up
chr12	102996452	102999200	ileum_up
chr12	103002950	103003971	ileum_up
chr12	103004861	103006497	ileum_up
chr12	103020035	103021550	ileum_up
chr12	103047925	103050790	ileum_up
chr12	103053172	103054641	ileum_up
chr12	103055704	103058504	ileum_up
chr12	104518804	104522260	ileum_up
chr12	104536199	104541794	ileum_up
chr12	104560380	104562459	ileum_up
chr12	104562644	104569545	ileum_up
chr12	104583712	104587952	ileum_up
chr12	104604843	104608099	ileum_up
chr12	104608816	104610484	ileum_up
chr12	112657924	112663061	ileum_up
chr12	112663255	112664965	ileum_up
chr12	112665425	112669010	ileum_up
chr12	112669411	112670998	ileum_up
chr12	112675451	112678410	ileum_up
chr12	112678900	112689710	ileum_up
chr12	112696120	112699315	ileum_up
chr12	112707251	112708262	ileum_up
chr12	114081629	114082972	ileum_up
chr12	114108556	114117487	ileum_up
chr12	114135293	114136692	ileum_up
chr12	114146957	114159824	ileum_up
chr12	114161585	114174794	ileum_up
chr13	12618011	12619880	ileum_up
chr13	12633897	12635692	ileum_up
chr13	12657449	12659211	ileum_up
chr13	12667218	12667918	ileum_up
chr13	12740112	12743839	ileum_up
chr13	24384410	24385668	ileum_up
chr13	24429586	24430513	ileum_up
chr13	24610704	24612724	ileum_up
chr13	24656956	24658808	ileum_up
chr13	24675941	24677972	ileum_up
chr13	31897020	31900927	ileum_up
chr13	31902157	31904198	ileum_up
chr13	32007574	32008066	ileum_up
chr13	32048424	32048900	ileum_up
chr13	32110357	32111587	ileum_up
chr13	32117272	32117956	ileum_up
chr13	32260973	32262018	ileum_up
chr13	32305917	32306349	ileum_up
chr13	32311786	32312265	ileum_up
chr13	32333605	32334600	ileum_up
chr13	32385774	32386667	ileum_up
chr13	32404476	32405074	ileum_up
chr13	32408964	32409750	ileum_up
chr13	32410025	32411207	ileum_up
chr13	32425333	32426780	ileum_up
chr13	32429506	32431547	ileum_up
chr13	32457364	32458116	ileum_up
chr13	32464082	32465203	ileum_up
chr13	32474070	32476091	ileum_up
chr13	32502690	32504139	ileum_up
chr13	32585013	32586099	ileum_up
chr13	32772774	32773512	ileum_up
chr13	32784069	32784832	ileum_up
chr13	32826055	32826693	ileum_up
chr13	32994991	32995763	ileum_up
chr13	33056818	33057640	ileum_up
chr13	33094924	33098086	ileum_up
chr13	51779432	51783388	ileum_up
chr13	51801006	51802733	ileum_up
chr13	51819747	51822111	ileum_up
chr13	51842567	51844847	ileum_up
chr13	51871750	51874171	ileum_up
chr13	51885588	51890553	ileum_up
chr13	51925999	51926821	ileum_up
chr13	51928608	51930364	ileum_up
chr13	51934619	51935529	ileum_up
chr13	53049117	53050757	ileum_up
chr13	53069718	53072374	ileum_up
chr13	53073191	53074411	ileum_up
chr13	53075258	53078700	ileum_up
chr13	53096006	53097496	ileum_up
chr13	53114821	53116040	ileum_up
chr13	53190950	53192493	ileum_up
chr13	53204309	53207485	ileum_up
chr13	53212996	53218030	ileum_up
chr13	53220656	53221652	ileum_up
chr13	53224994	53226975	ileum_up
chr13	53237328	53239201	ileum_up
chr13	53248337	53250553	ileum_up
chr13	53272919	53276988	ileum_up
chr13	53300231	53301507	ileum_up
chr13	53306767	53309751	ileum_up
chr13	53319557	53323343	ileum_up
chr13	53327319	53330813	ileum_up
chr13	53342418	53344608	ileum_up
chr13	53347303	53348160	ileum_up
chr13	53363173	53363720	ileum_up
chr13	53379626	53382162	ileum_up
chr13	58544887	58545692	ileum_up
chr13	58553572	58556001	ileum_up
chr13	58572897	58573636	ileum_up
chr13	58577443	58578235	ileum_up
chr13	58589789	58591492	ileum_up
chr13	58644009	58645939	ileum_up
chr13	58690485	58691519	ileum_up
chr13	58691959	58692746	ileum_up
chr13	58694341	58695034	ileum_up
chr13	58699891	58700947	ileum_up
chr13	58707753	58708366	ileum_up
chr13	58709581	58713039	ileum_up
chr13	58723255	58725184	ileum_up
chr13	58730157	58731297	ileum_up
chr13	58731470	58732040	ileum_up
chr13	58738636	58739339	ileum_up
chr13	58741720	58742158	ileum_up
chr13	58769935	58771123	ileum_up
chr13	58861116	58862845	ileum_up
chr13	74210722	74211335	ileum_up
chr13	74234074	74234802	ileum_up
chr13	74235818	74237863	ileum_up
chr13	74238715	74241016	ileum_up
chr13	74241284	74243085	ileum_up
chr13	74249340	74251662	ileum_up
chr13	74254203	74255279	ileum_up
chr13	74258308	74260524	ileum_up
chr13	74263466	74265887	ileum_up
chr13	74275854	74277878	ileum_up
chr13	74284186	74286832	ileum_up
chr13	74302535	74306380	ileum_up
chr13	91599552	91602168	ileum_up
chr13	91604601	91605077	ileum_up
chr13	91648672	91649497	ileum_up
chr13	91751558	91752652	ileum_up
chr13	91776381	91776882	ileum_up
chr13	91880452	91881596	ileum_up
chr13	94278039	94279031	ileum_up
chr13	94362605	94363729	ileum_up
chr13	94375314	94378006	ileum_up
chr13	94378149	94378950	ileum_up
chr13	94382699	94383634	ileum_up
chr13	94384249	94385052	ileum_up
chr13	94409255	94410334	ileum_up
chr13	96301174	96302731	ileum_up
chr13	96321679	96322362	ileum_up
chr13	96323579	96324940	ileum_up
chr13	96333546	96334159	ileum_up
chr13	96387587	96389394	ileum_up
chr13	113957915	113959423	ileum_up
chr13	117407193	117409036	ileum_up
chr13	117496038	117498056	ileum_up
chr13	117499539	117501645	ileum_up
chr13	117503553	117504092	ileum_up
chr13	117570125	117571533	ileum_up
chr13	117758229	117758843	ileum_up
chr13	117812692	117815318	ileum_up
chr13	118338822	118339368	ileum_up
chr13	118383300	118383784	ileum_up
chr14	20658439	20660188	ileum_up
chr14	20795668	20797218	ileum_up
chr14	20804429	20806818	ileum_up
chr14	20844188	20844983	ileum_up
chr14	20851159	20855009	ileum_up
chr14	20886360	20887632	ileum_up
chr14	20889785	20890443	ileum_up
chr14	20899849	20901036	ileum_up
chr14	20901080	20903210	ileum_up
chr14	47500292	47506287	ileum_up
chr14	47704268	47708362	ileum_up
chr14	47723925	47725196	ileum_up
chr14	47734804	47737607	ileum_up
chr14	47753502	47754165	ileum_up
chr14	47756027	47757042	ileum_up
chr14	47797375	47798379	ileum_up
chr14	47806137	47806641	ileum_up
chr14	47807506	47809830	ileum_up
chr14	47828316	47829824	ileum_up
chr14	47845626	47846157	ileum_up
chr14	47869148	47870023	ileum_up
chr14	47878639	47879060	ileum_up
chr14	56203019	56205463	ileum_up
chr14	56208765	56211905	ileum_up
chr14	56405745	56408181	ileum_up
chr14	56414310	56415312	ileum_up
chr14	56433441	56434792	ileum_up
chr14	56658476	56659155	ileum_up
chr14	56667840	56668444	ileum_up
chr14	56922953	56923511	ileum_up
chr14	56933163	56935825	ileum_up
chr14	56970498	56971423	ileum_up
chr14	63825630	63826774	ileum_up
chr14	63849747	63852237	ileum_up
chr14	63855756	63856585	ileum_up
chr14	63862654	63868026	ileum_up
chr14	63874279	63875928	ileum_up
chr14	63879528	63882158	ileum_up
chr14	63900527	63901219	ileum_up
chr14	63905568	63907276	ileum_up
chr14	63921610	63922889	ileum_up
chr14	63927549	63928581	ileum_up
chr14	63930721	63931338	ileum_up
chr14	63944021	63946409	ileum_up
chr14	63948042	63948862	ileum_up
chr14	63953999	63955293	ileum_up
chr14	63960757	63963644	ileum_up
chr14	63965429	63968179	ileum_up
chr14	63986544	63993360	ileum_up
chr14	63996125	64004327	ileum_up
chr14	66586604	66588106	ileum_up
chr14	66595436	66597450	ileum_up
chr14	66600905	66601479	ileum_up
chr14	66605776	66607406	ileum_up
chr14	66613552	66614315	ileum_up
chr14	70641082	70641760	ileum_up
chr14	70688522	70690034	ileum_up
chr14	70705142	70705853	ileum_up
chr14	70709407	70710660	ileum_up
chr14	70732147	70734778	ileum_up
chr14	70735962	70737126	ileum_up
chr14	70739518	70741821	ileum_up
chr14	70744215	70745361	ileum_up
chr14	75529936	75531476	ileum_up
chr14	75535533	75536898	ileum_up
chr14	75565145	75566933	ileum_up
chr14	75573859	75575471	ileum_up
chr14	75596251	75598802	ileum_up
chr14	75619118	75620106	ileum_up
chr14	110276249	110276886	ileum_up
chr14	110814372	110815138	ileum_up
chr14	111127534	111128277	ileum_up
chr14	111152974	111154780	ileum_up
chr14	111968312	111969179	ileum_up
chr14	122276986	122279016	ileum_up
chr14	122281831	122283014	ileum_up
chr14	122283385	122284502	ileum_up
chr14	122292635	122293578	ileum_up
chr14	122330743	122331302	ileum_up
chr14	122350461	122351419	ileum_up
chr14	122357897	122359001	ileum_up
chr14	122362544	122363595	ileum_up
chr15	6517422	6521386	ileum_up
chr15	6573292	6574229	ileum_up
chr15	6575186	6576232	ileum_up
chr15	52543073	52545143	ileum_up
chr15	52583196	52584007	ileum_up
chr15	52783272	52784090	ileum_up
chr15	52785021	52785951	ileum_up
chr15	52786164	52787511	ileum_up
chr15	52799238	52799938	ileum_up
chr15	52959857	52961154	ileum_up
chr15	52963761	52965276	ileum_up
chr15	53000653	53001218	ileum_up
chr15	53008239	53008976	ileum_up
chr15	53015525	53017201	ileum_up
chr15	53017487	53018143	ileum_up
chr15	53027581	53028467	ileum_up
chr15	53031252	53032235	ileum_up
chr15	53033633	53034934	ileum_up
chr15	53038885	53039957	ileum_up
chr15	53040052	53040776	ileum_up
chr15	53047024	53048674	ileum_up
chr15	53074285	53075392	ileum_up
chr15	53075548	53076160	ileum_up
chr15	53090023	53091973	ileum_up
chr15	53095315	53095970	ileum_up
chr15	53098164	53099644	ileum_up
chr15	53125843	53126653	ileum_up
chr15	53128782	53129987	ileum_up
chr15	53174436	53179073	ileum_up
chr15	53185242	53185903	ileum_up
chr15	53321914	53323251	ileum_up
chr15	53446980	53447463	ileum_up
chr15	53449509	53450152	ileum_up
chr15	53511434	53512422	ileum_up
chr15	53520072	53520755	ileum_up
chr15	53732442	53734667	ileum_up
chr15	63685300	63686950	ileum_up
chr15	63687323	63688359	ileum_up
chr15	63709918	63710561	ileum_up
chr15	63718910	63720521	ileum_up
chr15	63720922	63722060	ileum_up
chr15	63726771	63728179	ileum_up
chr15	74590660	74593524	ileum_up
chr15	74613682	74615587	ileum_up
chr15	74647026	74648516	ileum_up
chr15	74649355	74652646	ileum_up
chr15	74720770	74724207	ileum_up
chr15	74726574	74728582	ileum_up
chr15	74749657	74750596	ileum_up
chr15	74753682	74754687	ileum_up
chr15	74760653	74762999	ileum_up
chr15	74784468	74787798	ileum_up
chr15	74789486	74792012	ileum_up
chr15	74796891	74799594	ileum_up
chr15	74800473	74802025	ileum_up
chr15	74803540	74805939	ileum_up
chr15	78064303	78066693	ileum_up
chr15	78069732	78070405	ileum_up
chr15	78084022	78089104	ileum_up
chr15	78150815	78151765	ileum_up
chr15	78169396	78172258	ileum_up
chr15	78181956	78184268	ileum_up
chr15	78195652	78197130	ileum_up
chr15	78199137	78200062	ileum_up
chr15	78213844	78216171	ileum_up
chr15	78339947	78345757	ileum_up
chr15	78350109	78352094	ileum_up
chr15	78358976	78360773	ileum_up
chr15	78377390	78381201	ileum_up
chr15	78409720	78412884	ileum_up
chr15	78416778	78418458	ileum_up
chr15	78418986	78420355	ileum_up
chr15	79671650	79672288	ileum_up
chr15	79682081	79682768	ileum_up
chr15	79705224	79706860	ileum_up
chr15	79709208	79710363	ileum_up
chr15	79713326	79714324	ileum_up
chr15	79721793	79723871	ileum_up
chr15	79723996	79724681	ileum_up
chr15	79736621	79737965	ileum_up
chr15	79757237	79759703	ileum_up
chr15	79761540	79764819	ileum_up
chr15	80412400	80414016	ileum_up
chr15	80429139	80430559	ileum_up
chr15	80464410	80466735	ileum_up
chr15	80468827	80470242	ileum_up
chr15	80471684	80473273	ileum_up
chr15	80475197	80476888	ileum_up
chr15	80478374	80481801	ileum_up
chr15	84088430	84091992	ileum_up
chr15	84112841	84115765	ileum_up
chr15	84127930	84135142	ileum_up
chr15	84202535	84204160	ileum_up
chr15	84208559	84214319	ileum_up
chr15	84222402	84224981	ileum_up
chr15	84225056	84227239	ileum_up
chr15	84242689	84245236	ileum_up
chr15	84266433	84280290	ileum_up
chr15	84509485	84516261	ileum_up
chr15	84527903	84533637	ileum_up
chr15	84534459	84536744	ileum_up
chr15	84544651	84546022	ileum_up
chr15	84549125	84552090	ileum_up
chr15	84553974	84555087	ileum_up
chr15	84559507	84562322	ileum_up
chr15	84571367	84572667	ileum_up
chr15	84584633	84586519	ileum_up
chr15	84599495	84604106	ileum_up
chr15	84616323	84619857	ileum_up
chr15	84620714	84624765	ileum_up
chr15	84630083	84635986	ileum_up
chr15	84636816	84642073	ileum_up
chr15	84642127	84644316	ileum_up
chr15	84659616	84660371	ileum_up
chr15	84670618	84672187	ileum_up
chr15	84680757	84689837	ileum_up
chr15	102053559	102056063	ileum_up
chr15	102065314	102066888	ileum_up
chr15	102069490	102070292	ileum_up
chr15	102072889	102075723	ileum_up
chr15	102075835	102081653	ileum_up
chr15	102085939	102089733	ileum_up
chr15	103308618	103311203	ileum_up
chr16	4012578	4013589	ileum_up
chr16	4029223	4030722	ileum_up
chr16	4032150	4032876	ileum_up
chr16	4033087	4035545	ileum_up
chr16	4036127	4040455	ileum_up
chr16	4045209	4046054	ileum_up
chr16	10545056	10547369	ileum_up
chr16	10557397	10558572	ileum_up
chr16	10564695	10566299	ileum_up
chr16	10571707	10572532	ileum_up
chr16	10580616	10582233	ileum_up
chr16	10628967	10630464	ileum_up
chr16	10639872	10640742	ileum_up
chr16	10642189	10645163	ileum_up
chr16	10655018	10657688	ileum_up
chr16	10659672	10661265	ileum_up
chr16	10663567	10665190	ileum_up
chr16	10673935	10674786	ileum_up
chr16	10675554	10678027	ileum_up
chr16	10689695	10692022	ileum_up
chr16	10693585	10695589	ileum_up
chr16	10697390	10699243	ileum_up
chr16	10701418	10703543	ileum_up
chr16	10731718	10734281	ileum_up
chr16	10741000	10742085	ileum_up
chr16	10748962	10751340	ileum_up
chr16	10752981	10756306	ileum_up
chr16	10767219	10767932	ileum_up
chr16	10768113	10771648	ileum_up
chr16	10774627	10775354	ileum_up
chr16	10781765	10787758	ileum_up
chr16	19759940	19761665	ileum_up
chr16	19786297	19787328	ileum_up
chr16	19843942	19845009	ileum_up
chr16	19848439	19848907	ileum_up
chr16	20724377	20725083	ileum_up
chr16	20729660	20731078	ileum_up
chr16	20732304	20736488	ileum_up
chr16	23223852	23227305	ileum_up
chr16	23550396	23551862	ileum_up
chr16	23607971	23610518	ileum_up
chr16	32643647	32646622	ileum_up
chr16	32657631	32661696	ileum_up
chr16	32663174	32664902	ileum_up
chr16	32668122	32675764	ileum_up
chr16	32677852	32681295	ileum_up
chr16	32682262	32683154	ileum_up
chr16	32696623	32699618	ileum_up
chr16	32707226	32709777	ileum_up
chr16	32723103	32724480	ileum_up
chr16	32725595	32726339	ileum_up
chr16	32728246	32729999	ileum_up
chr16	32735843	32737688	ileum_up
chr16	32738089	32744077	ileum_up
chr16	32745150	32746667	ileum_up
chr16	35813060	35814369	ileum_up
chr16	35817224	35818066	ileum_up
chr16	35842037	35842739	ileum_up
chr16	35869024	35869925	ileum_up
chr16	35870238	35872825	ileum_up
chr16	35874489	35875177	ileum_up
chr16	35905327	35906658	ileum_up
chr16	35906893	35908334	ileum_up
chr16	35910813	35911986	ileum_up
chr16	35912679	35913228	ileum_up
chr16	35918128	35919666	ileum_up
chr16	35938334	35940573	ileum_up
chr16	36692815	36693598	ileum_up
chr16	36693657	36695450	ileum_up
chr16	36707349	36709230	ileum_up
chr16	36817432	36817892	ileum_up
chr16	36821528	36822275	ileum_up
chr16	36827719	36829090	ileum_up
chr16	46022268	46023613	ileum_up
chr16	46117572	46118362	ileum_up
chr16	46122001	46122795	ileum_up
chr16	46154907	46155391	ileum_up
chr16	46406535	46407863	ileum_up
chr16	46496023	46499028	ileum_up
chr16	55469081	55469643	ileum_up
chr16	55476796	55477626	ileum_up
chr16	55519695	55520513	ileum_up
chr16	55521059	55523286	ileum_up
chr16	55527238	55528260	ileum_up
chr16	55531892	55533725	ileum_up
chr16	55537622	55538268	ileum_up
chr16	55550888	55551512	ileum_up
chr16	55575763	55576629	ileum_up
chr16	55578748	55579302	ileum_up
chr16	55587171	55587713	ileum_up
chr16	55603787	55604213	ileum_up
chr16	55606272	55607430	ileum_up
chr16	55611094	55611917	ileum_up
chr16	55617524	55618356	ileum_up
chr16	55636198	55637344	ileum_up
chr16	55691034	55691539	ileum_up
chr16	55758029	55759723	ileum_up
chr16	55788737	55790114	ileum_up
chr16	55815478	55817273	ileum_up
chr16	55817476	55820271	ileum_up
chr16	55820399	55822955	ileum_up
chr16	55823079	55825353	ileum_up
chr16	55838145	55839724	ileum_up
chr16	55858358	55859053	ileum_up
chr16	55863010	55864176	ileum_up
chr16	92497683	92502461	ileum_up
chr16	92511758	92512797	ileum_up
chr16	92518545	92521851	ileum_up
chr16	92544334	92545020	ileum_up
chr16	92547905	92549559	ileum_up
chr16	92564557	92567499	ileum_up
chr16	92605698	92607676	ileum_up
chr16	92608464	92614107	ileum_up
chr16	92643911	92646782	ileum_up
chr16	92666849	92668576	ileum_up
chr16	92694690	92696335	ileum_up
chr16	92696764	92701283	ileum_up
chr16	92807950	92811444	ileum_up
chr16	92827841	92829630	ileum_up
chr16	92952809	92955094	ileum_up
chr16	92955399	92956506	ileum_up
chr16	92976178	92976913	ileum_up
chr16	92996359	92997571	ileum_up
chr16	93013373	93016315	ileum_up
chr16	93042124	93044903	ileum_up
chr16	93082926	93084348	ileum_up
chr16	93110552	93111506	ileum_up
chr16	93129209	93131120	ileum_up
chr16	93137184	93138354	ileum_up
chr16	93193392	93194892	ileum_up
chr16	93263419	93264122	ileum_up
chr16	93291361	93293978	ileum_up
chr16	93322963	93323950	ileum_up
chr16	93352269	93353301	ileum_up
chr16	93363720	93364921	ileum_up
chr16	93365127	93370815	ileum_up
chr16	93391560	93393589	ileum_up
chr16	93453162	93455166	ileum_up
chr16	93539726	93540569	ileum_up
chr16	93542195	93544470	ileum_up
chr16	93574576	93578200	ileum_up
chr16	96423224	96423936	ileum_up
chr16	96451919	96452511	ileum_up
chr16	96486349	96487052	ileum_up
chr16	96502121	96502865	ileum_up
chr16	96566282	96567352	ileum_up
chr16	96575043	96576204	ileum_up
chr16	97731963	97734465	ileum_up
chr16	97735259	97736588	ileum_up
chr16	97744528	97745213	ileum_up
chr16	97750777	97751325	ileum_up
chr16	97755565	97758255	ileum_up
chr17	8019360	8020701	ileum_up
chr17	8042970	8046033	ileum_up
chr17	8055855	8057258	ileum_up
chr17	8061235	8062514	ileum_up
chr17	8068739	8069324	ileum_up
chr17	8120272	8121353	ileum_up
chr17	24139119	24140532	ileum_up
chr17	24140970	24141777	ileum_up
chr17	24143944	24145403	ileum_up
chr17	24149707	24150403	ileum_up
chr17	24150808	24151954	ileum_up
chr17	24158233	24159529	ileum_up
chr17	24159942	24160495	ileum_up
chr17	24169025	24169846	ileum_up
chr17	24173389	24176637	ileum_up
chr17	24180837	24183606	ileum_up
chr17	24184149	24186294	ileum_up
chr17	24192483	24196674	ileum_up
chr17	28313218	28316121	ileum_up
chr17	28341091	28342447	ileum_up
chr17	28344294	28345204	ileum_up
chr17	28360101	28361715	ileum_up
chr17	28362536	28363804	ileum_up
chr17	28364473	28365346	ileum_up
chr17	30794613	30796082	ileum_up
chr17	30818457	30818992	ileum_up
chr17	30869312	30870413	ileum_up
chr17	30882718	30884670	ileum_up
chr17	30984035	30985052	ileum_up
chr17	30987368	30988952	ileum_up
chr17	31037080	31041654	ileum_up
chr17	31046719	31050640	ileum_up
chr17	33658176	33663233	ileum_up
chr17	34263620	34265097	ileum_up
chr17	34271191	34271866	ileum_up
chr17	34271948	34273183	ileum_up
chr17	34274325	34277485	ileum_up
chr17	34289104	34291453	ileum_up
chr17	34306176	34306678	ileum_up
chr17	34322593	34325601	ileum_up
chr17	34333977	34336746	ileum_up
chr17	34340209	34343860	ileum_up
chr17	34394477	34395329	ileum_up
chr17	34398089	34399138	ileum_up
chr17	34399810	34402682	ileum_up
chr17	34422484	34423325	ileum_up
chr17	34424451	34425263	ileum_up
chr17	34428438	34429004	ileum_up
chr17	34429236	34429902	ileum_up
chr17	34432596	34434040	ileum_up
chr17	34437294	34438654	ileum_up
chr17	34441682	34442124	ileum_up
chr17	34442460	34443762	ileum_up
chr17	34446158	34447239	ileum_up
chr17	34450299	34450844	ileum_up
chr17	34513655	34516155	ileum_up
chr17	34528792	34529666	ileum_up
chr17	34534870	34537304	ileum_up
chr17	34547914	34548703	ileum_up
chr17	34576568	34577723	ileum_up
chr17	34578585	34580472	ileum_up
chr17	34584721	34586389	ileum_up
chr17	34602588	34603313	ileum_up
chr17	34610953	34615162	ileum_up
chr17	34700703	34702728	ileum_up
chr17	34703952	34704771	ileum_up
chr17	34705037	34705943	ileum_up
chr17	34710347	34711269	ileum_up
chr17	34713238	34714521	ileum_up
chr17	34723101	34725446	ileum_up
chr17	34727496	34732105	ileum_up
chr17	35018134	35019349	ileum_up
chr17	35106842	35110057	ileum_up
chr17	35181111	35184389	ileum_up
chr17	35184452	35185707	ileum_up
chr17	35186312	35189533	ileum_up
chr17	35331150	35334380	ileum_up
chr17	35335632	35336591	ileum_up
chr17	35336940	35340150	ileum_up
chr17	35399237	35401670	ileum_up
chr17	35406142	35407322	ileum_up
chr17	35411585	35412508	ileum_up
chr17	35413120	35413924	ileum_up
chr17	35422123	35423270	ileum_up
chr17	35438328	35439679	ileum_up
chr17	35440545	35442220	ileum_up
chr17	35457001	35458972	ileum_up
chr17	35466596	35467077	ileum_up
chr17	35515866	35517641	ileum_up
chr17	35530384	35532618	ileum_up
chr17	35549087	35551560	ileum_up
chr17	35553955	35555344	ileum_up
chr17	35557271	35557779	ileum_up
chr17	35561119	35563514	ileum_up
chr17	36130014	36132557	ileum_up
chr17	36133755	36135770	ileum_up
chr17	36137281	36139444	ileum_up
chr17	36157212	36158172	ileum_up
chr17	36159879	36161511	ileum_up
chr17	36168138	36170016	ileum_up
chr17	36171438	36172976	ileum_up
chr17	36257394	36259517	ileum_up
chr17	36980743	36982025	ileum_up
chr17	36986821	36989072	ileum_up
chr17	36997787	36999562	ileum_up
chr17	37002946	37005009	ileum_up
chr17	37021892	37023434	ileum_up
chr17	37025557	37027813	ileum_up
chr17	37028734	37029752	ileum_up
chr17	37030785	37031614	ileum_up
chr17	37327543	37328091	ileum_up
chr17	37333712	37334714	ileum_up
chr17	37406574	37408695	ileum_up
chr17	43647108	43648199	ileum_up
chr17	43655485	43656277	ileum_up
chr17	43671394	43672407	ileum_up
chr17	43680923	43681524	ileum_up
chr17	43690905	43692651	ileum_up
chr17	43694358	43696176	ileum_up
chr17	43700280	43701148	ileum_up
chr17	43704805	43705994	ileum_up
chr17	43706606	43707416	ileum_up
chr17	43743580	43744302	ileum_up
chr17	43748469	43748962	ileum_up
chr17	43766021	43768011	ileum_up
chr17	48589983	48592159	ileum_up
chr17	48592907	48594664	ileum_up
chr17	48594862	48595822	ileum_up
chr17	48596157	48600140	ileum_up
chr17	48605357	48607605	ileum_up
chr17	48631808	48634725	ileum_up
chr17	48639502	48641705	ileum_up
chr17	48677588	48678605	ileum_up
chr17	48683715	48685263	ileum_up
chr17	48685555	48686331	ileum_up
chr17	48686460	48688339	ileum_up
chr17	48694684	48696662	ileum_up
chr17	48724732	48725864	ileum_up
chr17	48737500	48738375	ileum_up
chr17	48739650	48740810	ileum_up
chr17	48741601	48743855	ileum_up
chr17	48750018	48752180	ileum_up
chr17	48839621	48840920	ileum_up
chr17	48861796	48865197	ileum_up
chr17	48877425	48879659	ileum_up
chr17	49043728	49046031	ileum_up
chr17	49056320	49057256	ileum_up
chr17	53536309	53537691	ileum_up
chr17	53601688	53603630	ileum_up
chr17	57209310	57210788	ileum_up
chr17	57341131	57345741	ileum_up
chr17	57353457	57355545	ileum_up
chr17	57357678	57360780	ileum_up
chr17	57369089	57371395	ileum_up
chr17	57371942	57375940	ileum_up
chr17	57403283	57405769	ileum_up
chr17	57413111	57416952	ileum_up
chr17	57417623	57420279	ileum_up
chr17	57450910	57452184	ileum_up
chr17	57466688	57467969	ileum_up
chr17	57473337	57474693	ileum_up
chr17	57474902	57476119	ileum_up
chr17	73456591	73459000	ileum_up
chr17	73461410	73463211	ileum_up
chr17	73488841	73489333	ileum_up
chr17	73491493	73492472	ileum_up
chr17	73542293	73543070	ileum_up
chr17	73600074	73601495	ileum_up
chr17	73607186	73608601	ileum_up
chr17	73612220	73612948	ileum_up
chr17	73631566	73632661	ileum_up
chr17	73646112	73646844	ileum_up
chr17	73650485	73653450	ileum_up
chr17	73654123	73655625	ileum_up
chr17	73692095	73694642	ileum_up
chr17	73709614	73711840	ileum_up
chr17	73716187	73717814	ileum_up
chr17	73726426	73727975	ileum_up
chr17	73734535	73736398	ileum_up
chr17	73748202	73749422	ileum_up
chr17	73780975	73782780	ileum_up
chr17	73805334	73805994	ileum_up
chr17	73837156	73837660	ileum_up
chr17	73903707	73905061	ileum_up
chr17	73921246	73923006	ileum_up
chr17	73988574	73989936	ileum_up
chr17	74058327	74061693	ileum_up
chr17	74226824	74232923	ileum_up
chr17	74268054	74269142	ileum_up
chr17	74286829	74288566	ileum_up
chr17	74290941	74292481	ileum_up
chr17	74298201	74300660	ileum_up
chr17	74311206	74312999	ileum_up
chr17	74369601	74370501	ileum_up
chr18	21079204	21079852	ileum_up
chr18	21089504	21090657	ileum_up
chr18	21094746	21096043	ileum_up
chr18	21097073	21097713	ileum_up
chr18	21104168	21105402	ileum_up
chr18	21116653	21118389	ileum_up
chr18	21119346	21121876	ileum_up
chr18	21135069	21135591	ileum_up
chr18	32996498	32998423	ileum_up
chr18	33039984	33040709	ileum_up
chr18	33052275	33053045	ileum_up
chr18	33053927	33054584	ileum_up
chr18	33060574	33061283	ileum_up
chr18	33061948	33062741	ileum_up
chr18	33098122	33099666	ileum_up
chr18	33138814	33140913	ileum_up
chr18	33147050	33147658	ileum_up
chr18	33333776	33334782	ileum_up
chr18	33349898	33350425	ileum_up
chr18	33357771	33358325	ileum_up
chr18	33360153	33361546	ileum_up
chr18	33368277	33369785	ileum_up
chr18	33370411	33371210	ileum_up
chr18	35889147	35890628	ileum_up
chr18	35898737	35901022	ileum_up
chr18	35906231	35907441	ileum_up
chr18	35908013	35909037	ileum_up
chr18	35910674	35912323	ileum_up
chr18	36867761	36868993	ileum_up
chr18	36884854	36886814	ileum_up
chr18	60933681	60936276	ileum_up
chr18	60946596	60947315	ileum_up
chr18	60962726	60966894	ileum_up
chr18	61003388	61004783	ileum_up
chr18	61007330	61009629	ileum_up
chr18	61201738	61206654	ileum_up
chr18	61210435	61215865	ileum_up
chr18	61223740	61228792	ileum_up
chr18	61235823	61237343	ileum_up
chr18	61255793	61256639	ileum_up
chr18	61268012	61272252	ileum_up
chr18	61273344	61275479	ileum_up
chr18	61275688	61280529	ileum_up
chr18	61286035	61290948	ileum_up
chr18	61303260	61303937	ileum_up
chr18	61304111	61305383	ileum_up
chr18	61314116	61315742	ileum_up
chr18	61316053	61317281	ileum_up
chr18	61335320	61337829	ileum_up
chr18	65863501	65864213	ileum_up
chr18	65897496	65898489	ileum_up
chr18	65899013	65900650	ileum_up
chr18	65901295	65902604	ileum_up
chr18	65906719	65907690	ileum_up
chr18	65911552	65912543	ileum_up
chr18	65923675	65924553	ileum_up
chr18	65947887	65949026	ileum_up
chr18	65953069	65953919	ileum_up
chr18	65954270	65955536	ileum_up
chr18	65959407	65962506	ileum_up
chr18	65964190	65966840	ileum_up
chr18	65969812	65971090	ileum_up
chr18	70579681	70580488	ileum_up
chr18	70631294	70632970	ileum_up
chr19	3928796	3931092	ileum_up
chr19	3934917	3936948	ileum_up
chr19	3942206	3943850	ileum_up
chr19	3945886	3947344	ileum_up
chr19	3955669	3956991	ileum_up
chr19	3958357	3959353	ileum_up
chr19	4147102	4152255	ileum_up
chr19	4162090	4164385	ileum_up
chr19	4190276	4193606	ileum_up
chr19	4195746	4197798	ileum_up
chr19	5472615	5476170	ileum_up
chr19	6156270	6156827	ileum_up
chr19	6161827	6163123	ileum_up
chr19	6163738	6165267	ileum_up
chr19	6170827	6172331	ileum_up
chr19	10892780	10893575	ileum_up
chr19	10905891	10906384	ileum_up
chr19	12540215	12542348	ileum_up
chr19	12549734	12552034	ileum_up
chr19	12562134	12564716	ileum_up
chr19	12565620	12567030	ileum_up
chr19	12573748	12577115	ileum_up
chr19	12869013	12871641	ileum_up
chr19	12877312	12877768	ileum_up
chr19	12878677	12879501	ileum_up
chr19	17198634	17199379	ileum_up
chr19	17210990	17211936	ileum_up
chr19	17214126	17215771	ileum_up
chr19	17237722	17238625	ileum_up
chr19	17330662	17332141	ileum_up
chr19	17357655	17358284	ileum_up
chr19	17384252	17386353	ileum_up
chr19	17390567	17391640	ileum_up
chr19	17420287	17421814	ileum_up
chr19	17430473	17431476	ileum_up
chr19	17439176	17439686	ileum_up
chr19	17459825	17460509	ileum_up
chr19	17461664	17462136	ileum_up
chr19	17462828	17463345	ileum_up
chr19	21345737	21347773	ileum_up
chr19	21348438	21349682	ileum_up
chr19	21411531	21412613	ileum_up
chr19	21446926	21448572	ileum_up
chr19	21450968	21452250	ileum_up
chr19	21481386	21482457	ileum_up
chr19	21507475	21508292	ileum_up
chr19	21546434	21547642	ileum_up
chr19	21550679	21551903	ileum_up
chr19	21561289	21562960	ileum_up
chr19	21568357	21569155	ileum_up
chr19	21578958	21579891	ileum_up
chr19	21582081	21583283	ileum_up
chr19	21584533	21585025	ileum_up
chr19	21638293	21639179	ileum_up
chr19	21645243	21646516	ileum_up
chr19	21664149	21664948	ileum_up
chr19	21678274	21679496	ileum_up
chr19	21696787	21697268	ileum_up
chr19	21702632	21703351	ileum_up
chr19	21711932	21712874	ileum_up
chr19	21719656	21721392	ileum_up
chr19	29324376	29327905	ileum_up
chr19	29328130	29328713	ileum_up
chr19	29341618	29342436	ileum_up
chr19	29345511	29346133	ileum_up
chr19	29365942	29366506	ileum_up
chr19	29399176	29400577	ileum_up
chr19	29434209	29437154	ileum_up
chr19	29441160	29442361	ileum_up
chr19	31942644	31945080	ileum_up
chr19	31952256	31953884	ileum_up
chr19	32028878	32029705	ileum_up
chr19	32046456	32047004	ileum_up
chr19	32092371	32093536	ileum_up
chr19	32104694	32105848	ileum_up
chr19	32107162	32107878	ileum_up
chr19	32135592	32136469	ileum_up
chr19	32144038	32144571	ileum_up
chr19	32145396	32146210	ileum_up
chr19	32162437	32163352	ileum_up
chr19	32166614	32167374	ileum_up
chr19	32178360	32179413	ileum_up
chr19	32181172	32182983	ileum_up
chr19	32194079	32194539	ileum_up
chr19	32198508	32199302	ileum_up
chr19	32201627	32202552	ileum_up
chr19	32203687	32204408	ileum_up
chr19	32216804	32217323	ileum_up
chr19	32227920	32228445	ileum_up
chr19	32229709	32230344	ileum_up
chr19	32231332	32232253	ileum_up
chr19	32244585	32245082	ileum_up
chr19	32253809	32255256	ileum_up
chr19	32255272	32256873	ileum_up
chr19	32260832	32261652	ileum_up
chr19	32268424	32269116	ileum_up
chr19	32276086	32277665	ileum_up
chr19	34344525	34346206	ileum_up
chr19	34364302	34366769	ileum_up
chr19	34408736	34409276	ileum_up
chr19	34622455	34623233	ileum_up
chr19	34624810	34625908	ileum_up
chr19	34627685	34629664	ileum_up
chr19	34631013	34631672	ileum_up
chr19	34647534	34648785	ileum_up
chr19	34657116	34658454	ileum_up
chr19	34672664	34674205	ileum_up
chr19	34711307	34711929	ileum_up
chr19	34713863	34716149	ileum_up
chr19	34736374	34737638	ileum_up
chr19	34759286	34759801	ileum_up
chr19	34772683	34773378	ileum_up
chr19	38127869	38130219	ileum_up
chr19	38157234	38158284	ileum_up
chr19	38161431	38162268	ileum_up
chr19	41353700	41355107	ileum_up
chr19	41356503	41359846	ileum_up
chr19	41360890	41363658	ileum_up
chr19	41385097	41386178	ileum_up
chr19	41388084	41388930	ileum_up
chr19	41391987	41393623	ileum_up
chr19	41404385	41405773	ileum_up
chr19	41419179	41423243	ileum_up
chr19	41443715	41445658	ileum_up
chr19	41455700	41460634	ileum_up
chr19	41518256	41521129	ileum_up
chr19	41522108	41522907	ileum_up
chr19	41548365	41549891	ileum_up
chr19	41555443	41556361	ileum_up
chr19	41556547	41558637	ileum_up
chr19	41569775	41570908	ileum_up
chr2	5765100	5767104	ileum_up
chr2	5770657	5771599	ileum_up
chr2	11113855	11115239	ileum_up
chr2	11209539	11210618	ileum_up
chr2	11251000	11251923	ileum_up
chr2	11253065	11254448	ileum_up
chr2	11283150	11284611	ileum_up
chr2	11296598	11297138	ileum_up
chr2	11301902	11302443	ileum_up
chr2	11319898	11321754	ileum_up
chr2	11323529	11324863	ileum_up
chr2	11337606	11338425	ileum_up
chr2	11347067	11347957	ileum_up
chr2	11350991	11352041	ileum_up
chr2	11422059	11426198	ileum_up
chr2	11456233	11458101	ileum_up
chr2	11464162	11465218	ileum_up
chr2	11473517	11476448	ileum_up
chr2	11523512	11525326	ileum_up
chr2	18658363	18659265	ileum_up
chr2	18687242	18689350	ileum_up
chr2	18693967	18694681	ileum_up
chr2	18695526	18696707	ileum_up
chr2	18699565	18700464	ileum_up
chr2	18721273	18723520	ileum_up
chr2	18742365	18744215	ileum_up
chr2	18918240	18920570	ileum_up
chr2	22476231	22480327	ileum_up
chr2	22576947	22578026	ileum_up
chr2	22594713	22595520	ileum_up
chr2	22599020	22600887	ileum_up
chr2	22608887	22610525	ileum_up
chr2	22613949	22614597	ileum_up
chr2	22628988	22630456	ileum_up
chr2	22720111	22720684	ileum_up
chr2	22728463	22729604	ileum_up
chr2	22729821	22730887	ileum_up
chr2	22731271	22733393	ileum_up
chr2	28351966	28353837	ileum_up
chr2	28358399	28359047	ileum_up
chr2	28367536	28370688	ileum_up
chr2	28370950	28371907	ileum_up
chr2	28372379	28374156	ileum_up
chr2	28376852	28378184	ileum_up
chr2	28379035	28379795	ileum_up
chr2	28379972	28382583	ileum_up
chr2	34792857	34794564	ileum_up
chr2	34815508	34817981	ileum_up
chr2	34820232	34821995	ileum_up
chr2	34825245	34828121	ileum_up
chr2	34837517	34839521	ileum_up
chr2	34861803	34862693	ileum_up
chr2	34900375	34901143	ileum_up
chr2	35136752	35140103	ileum_up
chr2	35144301	35145109	ileum_up
chr2	35152865	35154195	ileum_up
chr2	35154424	35155986	ileum_up
chr2	35159451	35161963	ileum_up
chr2	35165142	35166602	ileum_up
chr2	35177285	35179241	ileum_up
chr2	35188144	35188881	ileum_up
chr2	35191561	35193365	ileum_up
chr2	35193656	35194545	ileum_up
chr2	35198018	35198682	ileum_up
chr2	35204612	35205363	ileum_up
chr2	35205681	35206156	ileum_up
chr2	60491724	60492401	ileum_up
chr2	60492569	60493470	ileum_up
chr2	60510505	60512066	ileum_up
chr2	60526721	60527935	ileum_up
chr2	60530255	60531166	ileum_up
chr2	60532419	60534973	ileum_up
chr2	60540559	60542351	ileum_up
chr2	60551770	60552697	ileum_up
chr2	60557723	60559451	ileum_up
chr2	60638966	60640730	ileum_up
chr2	60648562	60649239	ileum_up
chr2	75828794	75829555	ileum_up
chr2	75835583	75836546	ileum_up
chr2	75839172	75839901	ileum_up
chr2	75887691	75888746	ileum_up
chr2	75888849	75890139	ileum_up
chr2	75908247	75909328	ileum_up
chr2	75947243	75948380	ileum_up
chr2	75952762	75953257	ileum_up
chr2	75966088	75967831	ileum_up
chr2	75968121	75968928	ileum_up
chr2	76092600	76093409	ileum_up
chr2	76170138	76170954	ileum_up
chr2	76174788	76178255	ileum_up
chr2	79242780	79244272	ileum_up
chr2	84637988	84640090	ileum_up
chr2	84640372	84640895	ileum_up
chr2	84650655	84652745	ileum_up
chr2	102555921	102556519	ileum_up
chr2	102583842	102585058	ileum_up
chr2	102585139	102586493	ileum_up
chr2	102604661	102606219	ileum_up
chr2	102643991	102644723	ileum_up
chr2	102654842	102656724	ileum_up
chr2	102665883	102666822	ileum_up
chr2	102667953	102669203	ileum_up
chr2	102669298	102669813	ileum_up
chr2	102738894	102742588	ileum_up
chr2	102765108	102765523	ileum_up
chr2	102780367	102781744	ileum_up
chr2	102782101	102783182	ileum_up
chr2	102819275	102820569	ileum_up
chr2	102903070	102903577	ileum_up
chr2	103648410	103649147	ileum_up
chr2	103657190	103658118	ileum_up
chr2	103664856	103665693	ileum_up
chr2	103668906	103669744	ileum_up
chr2	103688801	103689748	ileum_up
chr2	103808876	103812483	ileum_up
chr2	103822276	103822896	ileum_up
chr2	117074894	117076609	ileum_up
chr2	117089448	117090008	ileum_up
chr2	117167797	117169545	ileum_up
chr2	117264346	117265572	ileum_up
chr2	117337207	117338769	ileum_up
chr2	117367101	117367778	ileum_up
chr2	117767272	117768236	ileum_up
chr2	117860085	117860847	ileum_up
chr2	117867613	117869106	ileum_up
chr2	117924240	117925785	ileum_up
chr2	119149579	119155517	ileum_up
chr2	119162587	119164360	ileum_up
chr2	119175996	119177719	ileum_up
chr2	119185437	119186024	ileum_up
chr2	119191983	119194636	ileum_up
chr2	119196499	119197274	ileum_up
chr2	119224038	119225591	ileum_up
chr2	119301382	119304476	ileum_up
chr2	122059591	122061775	ileum_up
chr2	122066458	122068227	ileum_up
chr2	122069220	122070733	ileum_up
chr2	122085631	122088047	ileum_up
chr2	122091278	122093652	ileum_up
chr2	122094830	122097236	ileum_up
chr2	122101997	122102951	ileum_up
chr2	122103757	122106137	ileum_up
chr2	122108330	122112760	ileum_up
chr2	122121610	122131010	ileum_up
chr2	122137700	122141643	ileum_up
chr2	122200891	122202490	ileum_up
chr2	122202797	122205226	ileum_up
chr2	122206167	122207870	ileum_up
chr2	122292745	122294074	ileum_up
chr2	122395116	122395645	ileum_up
chr2	122436370	122437488	ileum_up
chr2	122455453	122457720	ileum_up
chr2	122462855	122464209	ileum_up
chr2	122477596	122478646	ileum_up
chr2	122482899	122485456	ileum_up
chr2	122488352	122489124	ileum_up
chr2	122490684	122492773	ileum_up
chr2	122493567	122494092	ileum_up
chr2	122504086	122505333	ileum_up
chr2	122507011	122508199	ileum_up
chr2	122523138	122523750	ileum_up
chr2	124332721	124334082	ileum_up
chr2	124337580	124338117	ileum_up
chr2	124418223	124419159	ileum_up
chr2	124422148	124422735	ileum_up
chr2	124424712	124425961	ileum_up
chr2	124426954	124428641	ileum_up
chr2	124428923	124429477	ileum_up
chr2	124435304	124437343	ileum_up
chr2	124443536	124445458	ileum_up
chr2	124447640	124448443	ileum_up
chr2	124449362	124450776	ileum_up
chr2	124453315	124454013	ileum_up
chr2	124544677	124546356	ileum_up
chr2	124753974	124754662	ileum_up
chr2	150326088	150326794	ileum_up
chr2	150351115	150352067	ileum_up
chr2	152673147	152674456	ileum_up
chr2	152728927	152734534	ileum_up
chr2	156687486	156690576	ileum_up
chr2	156698932	156701049	ileum_up
chr2	156719498	156721132	ileum_up
chr2	156730698	156731173	ileum_up
chr2	156760522	156761746	ileum_up
chr2	156776885	156777674	ileum_up
chr2	156808057	156809187	ileum_up
chr2	156816533	156818256	ileum_up
chr2	156912273	156915232	ileum_up
chr2	156920136	156921426	ileum_up
chr2	156952181	156953593	ileum_up
chr2	156956793	156957337	ileum_up
chr2	156959958	156961724	ileum_up
chr2	156974084	156974700	ileum_up
chr2	157027164	157027866	ileum_up
chr2	157029098	157030991	ileum_up
chr2	157853351	157856666	ileum_up
chr2	157873511	157874075	ileum_up
chr2	157890281	157891321	ileum_up
chr2	157896006	157899520	ileum_up
chr2	157905403	157907692	ileum_up
chr2	157922786	157925158	ileum_up
chr2	157930269	157931720	ileum_up
chr2	157932498	157933754	ileum_up
chr2	157938668	157940151	ileum_up
chr2	157947040	157949128	ileum_up
chr2	157954419	157958693	ileum_up
chr2	157969488	157973127	ileum_up
chr2	157979373	157980909	ileum_up
chr2	157984954	157986701	ileum_up
chr2	157992114	157994043	ileum_up
chr2	157999509	158000768	ileum_up
chr2	158003255	158006126	ileum_up
chr2	158006500	158008306	ileum_up
chr2	158016439	158018358	ileum_up
chr2	158019288	158024091	ileum_up
chr2	158027589	158031195	ileum_up
chr2	158033064	158034969	ileum_up
chr2	158037154	158043307	ileum_up
chr2	158050792	158052019	ileum_up
chr2	158053290	158056294	ileum_up
chr2	158450162	158452347	ileum_up
chr2	158455074	158455996	ileum_up
chr2	158467335	158468357	ileum_up
chr2	158478343	158479247	ileum_up
chr2	158484062	158485413	ileum_up
chr2	158491833	158496490	ileum_up
chr2	158570236	158572559	ileum_up
chr2	164681745	164683930	ileum_up
chr2	164684650	164685963	ileum_up
chr2	168098218	168102445	ileum_up
chr2	168104201	168108977	ileum_up
chr2	168245815	168246993	ileum_up
chr2	168270182	168275445	ileum_up
chr2	168276240	168279458	ileum_up
chr2	168294238	168295165	ileum_up
chr2	168295268	168297237	ileum_up
chr2	168297527	168300738	ileum_up
chr2	168342875	168344433	ileum_up
chr2	168349586	168351854	ileum_up
chr2	168356944	168359153	ileum_up
chr2	168364549	168365819	ileum_up
chr2	168369557	168372240	ileum_up
chr2	168377313	168379742	ileum_up
chr2	168414316	168417238	ileum_up
chr2	168449849	168455217	ileum_up
chr2	168467254	168470230	ileum_up
chr2	168479161	168481309	ileum_up
chr2	168492755	168494828	ileum_up
chr2	168502245	168505517	ileum_up
chr2	168516943	168518366	ileum_up
chr2	168546651	168547795	ileum_up
chr2	168551318	168552129	ileum_up
chr2	168559122	168560384	ileum_up
chr2	168560660	168561749	ileum_up
chr2	168565730	168568567	ileum_up
chr2	172976856	172979624	ileum_up
chr2	172984679	172986421	ileum_up
chr2	172988825	172989617	ileum_up
chr2	172989859	172990589	ileum_up
chr2	172994237	172997992	ileum_up
chr2	173009396	173011310	ileum_up
chr2	173011400	173013549	ileum_up
chr2	173042069	173045729	ileum_up
chr2	173053300	173060672	ileum_up
chr2	173068158	173070229	ileum_up
chr2	173078296	173085764	ileum_up
chr2	173086171	173094338	ileum_up
chr2	173099104	173103429	ileum_up
chr2	180920719	180924585	ileum_up
chr2	180930441	180932326	ileum_up
chr2	180935501	180938576	ileum_up
chr2	180940685	180941921	ileum_up
chr2	180946577	180949009	ileum_up
chr3	7612456	7614061	ileum_up
chr3	8006139	8007577	ileum_up
chr3	8035112	8035672	ileum_up
chr3	8244494	8246766	ileum_up
chr3	27081375	27083618	ileum_up
chr3	27087073	27090030	ileum_up
chr3	27093818	27096155	ileum_up
chr3	27108493	27109133	ileum_up
chr3	27113136	27114314	ileum_up
chr3	27130955	27133911	ileum_up
chr3	27135863	27136694	ileum_up
chr3	27168705	27169832	ileum_up
chr3	27171585	27173012	ileum_up
chr3	27181118	27183438	ileum_up
chr3	27187485	27188200	ileum_up
chr3	27215419	27216863	ileum_up
chr3	27218509	27220604	ileum_up
chr3	27244296	27245022	ileum_up
chr3	30691505	30693249	ileum_up
chr3	30744751	30747153	ileum_up
chr3	30752379	30753051	ileum_up
chr3	30753528	30755651	ileum_up
chr3	30755889	30756687	ileum_up
chr3	30773661	30774451	ileum_up
chr3	30850603	30852086	ileum_up
chr3	30866872	30868711	ileum_up
chr3	30894024	30895951	ileum_up
chr3	30955089	30956803	ileum_up
chr3	30966717	30967325	ileum_up
chr3	30974299	30975428	ileum_up
chr3	30975730	30977707	ileum_up
chr3	30978328	30978908	ileum_up
chr3	30982408	30983169	ileum_up
chr3	30992073	30995122	ileum_up
chr3	31028347	31029324	ileum_up
chr3	31032297	31034578	ileum_up
chr3	36695826	36697902	ileum_up
chr3	36735285	36736480	ileum_up
chr3	36739629	36740334	ileum_up
chr3	36760638	36763232	ileum_up
chr3	36763284	36763918	ileum_up
chr3	36840540	36841489	ileum_up
chr3	56379110	56379940	ileum_up
chr3	56940674	56941183	ileum_up
chr3	57071396	57072047	ileum_up
chr3	57081158	57081915	ileum_up
chr3	57146568	57147350	ileum_up
chr3	57147652	57148746	ileum_up
chr3	57213664	57215159	ileum_up
chr3	58862446	58863693	ileum_up
chr3	58882981	58883698	ileum_up
chr3	58924139	58924882	ileum_up
chr3	83565576	83571526	ileum_up
chr3	83574375	83574888	ileum_up
chr3	83592265	83594655	ileum_up
chr3	83601629	83602376	ileum_up
chr3	83639802	83641136	ileum_up
chr3	83644595	83646615	ileum_up
chr3	83702797	83704310	ileum_up
chr3	83718850	83720489	ileum_up
chr3	83825545	83826272	ileum_up
chr3	83840740	83841174	ileum_up
chr3	83842047	83845464	ileum_up
chr3	87180640	87182123	ileum_up
chr3	87211907	87212507	ileum_up
chr3	87214581	87216251	ileum_up
chr3	87302888	87303538	ileum_up
[truncated: 1,124 more rows]

## Sheet: ileum_down
TABLE S12: Genome coordinates of DHS within the regulatory domain of genes consistently up- or down-regulated in the ileum or colon of colonized vs. germ-free mice.
chrom	start	stop	category
chr1	9745541	9746147	ileum_down
chr1	9762819	9763260	ileum_down
chr1	9770274	9770881	ileum_down
chr1	9787723	9789473	ileum_down
chr1	9789820	9790400	ileum_down
chr1	9837384	9839335	ileum_down
chr1	21086902	21087606	ileum_down
chr1	21090762	21092219	ileum_down
chr1	21151588	21152292	ileum_down
chr1	21155673	21157520	ileum_down
chr1	21203442	21204145	ileum_down
chr1	21208078	21209991	ileum_down
chr1	21218605	21219898	ileum_down
chr1	21221301	21222611	ileum_down
chr1	21230018	21231733	ileum_down
chr1	21260782	21262656	ileum_down
chr1	21266062	21266697	ileum_down
chr1	38166526	38167345	ileum_down
chr1	38175566	38176036	ileum_down
chr1	38185252	38187445	ileum_down
chr1	38189535	38190596	ileum_down
chr1	38241972	38243315	ileum_down
chr1	38308158	38310185	ileum_down
chr1	38364735	38365940	ileum_down
chr1	38683249	38685561	ileum_down
chr1	39423821	39426759	ileum_down
chr1	39448409	39449959	ileum_down
chr1	39514011	39516272	ileum_down
chr1	39523695	39526347	ileum_down
chr1	39533055	39536398	ileum_down
chr1	39579292	39579891	ileum_down
chr1	39584180	39584753	ileum_down
chr1	39586955	39587736	ileum_down
chr1	40435344	40436203	ileum_down
chr1	40445453	40445980	ileum_down
chr1	40475272	40475772	ileum_down
chr1	40480610	40481351	ileum_down
chr1	40736813	40740276	ileum_down
chr1	40748152	40748963	ileum_down
chr1	40752983	40753887	ileum_down
chr1	40764655	40765362	ileum_down
chr1	40765871	40766716	ileum_down
chr1	40769872	40770431	ileum_down
chr1	40770975	40772247	ileum_down
chr1	40816200	40817528	ileum_down
chr1	40821232	40822328	ileum_down
chr1	40827488	40828630	ileum_down
chr1	40833506	40834480	ileum_down
chr1	40842272	40843502	ileum_down
chr1	40846473	40848360	ileum_down
chr1	40854085	40854685	ileum_down
chr1	52175363	52177825	ileum_down
chr1	52198112	52199437	ileum_down
chr1	52203046	52204219	ileum_down
chr1	52206061	52207398	ileum_down
chr1	52225879	52229285	ileum_down
chr1	52288498	52290722	ileum_down
chr1	52305701	52306672	ileum_down
chr1	52307815	52309712	ileum_down
chr1	52312417	52315713	ileum_down
chr1	52328390	52329783	ileum_down
chr1	52336079	52336669	ileum_down
chr1	52337961	52340072	ileum_down
chr1	52344238	52345030	ileum_down
chr1	52349741	52351124	ileum_down
chr1	52352349	52353004	ileum_down
chr1	52359300	52359910	ileum_down
chr1	52513330	52513949	ileum_down
chr1	52901375	52903021	ileum_down
chr1	52944201	52944615	ileum_down
chr1	52973230	52974013	ileum_down
chr1	53007912	53010970	ileum_down
chr1	53011208	53012487	ileum_down
chr1	53369889	53370965	ileum_down
chr1	53379871	53380622	ileum_down
chr1	53380900	53381603	ileum_down
chr1	53408397	53410047	ileum_down
chr1	56838712	56839435	ileum_down
chr1	56846283	56847175	ileum_down
chr1	56878007	56879836	ileum_down
chr1	56886847	56887517	ileum_down
chr1	56892324	56893756	ileum_down
chr1	56945617	56946280	ileum_down
chr1	56954287	56955070	ileum_down
chr1	57005779	57006443	ileum_down
chr1	57008047	57009020	ileum_down
chr1	57009819	57010468	ileum_down
chr1	57025922	57030907	ileum_down
chr1	57032132	57035413	ileum_down
chr1	57048228	57048953	ileum_down
chr1	57261257	57263960	ileum_down
chr1	65176125	65177396	ileum_down
chr1	65193085	65193711	ileum_down
chr1	65223418	65226805	ileum_down
chr1	74330295	74332895	ileum_down
chr1	74333659	74334221	ileum_down
chr1	74341417	74344393	ileum_down
chr1	74344969	74346668	ileum_down
chr1	74348963	74351376	ileum_down
chr1	74707758	74709810	ileum_down
chr1	74743445	74744586	ileum_down
chr1	74744808	74746042	ileum_down
chr1	74759330	74761651	ileum_down
chr1	74772434	74774240	ileum_down
chr1	74794875	74796488	ileum_down
chr1	74797103	74798195	ileum_down
chr1	74800018	74801810	ileum_down
chr1	74806264	74806898	ileum_down
chr1	74987671	74990050	ileum_down
chr1	74991945	74999051	ileum_down
chr1	75007867	75010273	ileum_down
chr1	75010922	75011719	ileum_down
chr1	75014130	75015190	ileum_down
chr1	75016016	75019724	ileum_down
chr1	75019911	75020610	ileum_down
chr1	75052275	75053096	ileum_down
chr1	75057364	75057836	ileum_down
chr1	75062051	75064122	ileum_down
chr1	75069818	75072036	ileum_down
chr1	75073565	75074701	ileum_down
chr1	75120590	75122768	ileum_down
chr1	75137240	75140215	ileum_down
chr1	75144065	75144836	ileum_down
chr1	75164405	75166252	ileum_down
chr1	75175472	75178238	ileum_down
chr1	75181954	75183055	ileum_down
chr1	75186982	75190048	ileum_down
chr1	75332893	75333871	ileum_down
chr1	75334247	75335725	ileum_down
chr1	75339172	75340128	ileum_down
chr1	75356414	75360445	ileum_down
chr1	75365634	75367675	ileum_down
chr1	88994956	88999879	ileum_down
chr1	89020659	89023212	ileum_down
chr1	89041351	89054009	ileum_down
chr1	89109454	89112049	ileum_down
chr1	89142544	89143323	ileum_down
chr1	89154029	89155561	ileum_down
chr1	89158661	89163525	ileum_down
chr1	89190330	89192087	ileum_down
chr1	89196816	89197874	ileum_down
chr1	89205302	89206608	ileum_down
chr1	89212137	89212900	ileum_down
chr1	89212947	89214213	ileum_down
chr1	89366364	89376580	ileum_down
chr1	89404985	89409024	ileum_down
chr1	89437891	89438747	ileum_down
chr1	89447252	89448516	ileum_down
chr1	89450210	89451934	ileum_down
chr1	89462249	89463189	ileum_down
chr1	89468081	89472275	ileum_down
chr1	89475233	89476393	ileum_down
chr1	89486167	89488124	ileum_down
chr1	89501320	89506412	ileum_down
chr1	93074815	93078333	ileum_down
chr1	93103408	93109103	ileum_down
chr1	93114570	93116727	ileum_down
chr1	93131040	93131662	ileum_down
chr1	93137031	93138286	ileum_down
chr1	93144623	93148159	ileum_down
chr1	93148442	93149342	ileum_down
chr1	93308130	93312331	ileum_down
chr1	93324990	93326702	ileum_down
chr1	93332091	93334040	ileum_down
chr1	93338255	93340442	ileum_down
chr1	93340844	93343909	ileum_down
chr1	93345625	93346485	ileum_down
chr1	93349113	93354069	ileum_down
chr1	93354151	93357630	ileum_down
chr1	95549903	95551999	ileum_down
chr1	95553158	95554081	ileum_down
chr1	95564143	95566320	ileum_down
chr1	95581375	95585983	ileum_down
chr1	95588473	95591105	ileum_down
chr1	95599445	95601382	ileum_down
chr1	95620972	95622805	ileum_down
chr1	95623299	95624090	ileum_down
chr1	95628286	95628973	ileum_down
chr1	95633463	95634862	ileum_down
chr1	99769906	99770900	ileum_down
chr1	99822382	99823960	ileum_down
chr1	99873257	99874209	ileum_down
chr1	99922310	99923230	ileum_down
chr1	99932302	99932829	ileum_down
chr1	99934732	99935252	ileum_down
chr1	99968102	99969189	ileum_down
chr1	99980583	99981684	ileum_down
chr1	99985736	99986428	ileum_down
chr1	99988843	99989788	ileum_down
chr1	99991033	99993753	ileum_down
chr1	100043780	100044704	ileum_down
chr1	100075005	100075995	ileum_down
chr1	108067276	108071100	ileum_down
chr1	108173851	108175724	ileum_down
chr1	108205895	108206738	ileum_down
chr1	108291966	108292561	ileum_down
chr1	108303673	108305817	ileum_down
chr1	108321409	108323470	ileum_down
chr1	108324445	108325856	ileum_down
chr1	108345861	108347672	ileum_down
chr1	108348331	108350028	ileum_down
chr1	108357112	108358048	ileum_down
chr1	108373221	108375972	ileum_down
chr1	108377462	108378523	ileum_down
chr1	108408022	108408773	ileum_down
chr1	108435145	108436864	ileum_down
chr1	108438567	108439719	ileum_down
chr1	108470703	108471665	ileum_down
chr1	108479326	108481789	ileum_down
chr1	108482515	108484289	ileum_down
chr1	108487663	108488400	ileum_down
chr1	108492446	108493641	ileum_down
chr1	108525356	108527218	ileum_down
chr1	108608287	108609744	ileum_down
chr1	108610002	108611480	ileum_down
chr1	108634560	108635395	ileum_down
chr1	108648463	108649353	ileum_down
chr1	108652787	108654225	ileum_down
chr1	108655139	108657457	ileum_down
chr1	113760455	113762006	ileum_down
chr1	114352575	114353053	ileum_down
chr1	120284584	120287222	ileum_down
chr1	120324706	120325718	ileum_down
chr1	120346213	120346845	ileum_down
chr1	120347482	120348453	ileum_down
chr1	120354485	120356742	ileum_down
chr1	120373067	120373941	ileum_down
chr1	120394233	120395366	ileum_down
chr1	120491404	120493120	ileum_down
chr1	120510025	120511056	ileum_down
chr1	120519159	120520178	ileum_down
chr1	120523035	120525597	ileum_down
chr1	120526277	120527658	ileum_down
chr1	120543430	120545366	ileum_down
chr1	120545533	120548126	ileum_down
chr1	120548255	120549298	ileum_down
chr1	120586207	120587197	ileum_down
chr1	120641974	120644966	ileum_down
chr1	120652736	120656710	ileum_down
chr1	120668669	120669350	ileum_down
chr1	120720705	120724294	ileum_down
chr1	120773872	120776301	ileum_down
chr1	120776597	120778134	ileum_down
chr1	120809646	120812013	ileum_down
chr1	120820515	120822600	ileum_down
chr1	120826729	120828544	ileum_down
chr1	120850208	120856196	ileum_down
chr1	120862590	120863946	ileum_down
chr1	120917933	120925069	ileum_down
chr1	120928399	120929783	ileum_down
chr1	120943781	120945895	ileum_down
chr1	120946304	120951928	ileum_down
chr1	121908820	121910364	ileum_down
chr1	121912738	121913372	ileum_down
chr1	121923773	121926660	ileum_down
chr1	121926786	121927830	ileum_down
chr1	121928995	121930299	ileum_down
chr1	121933508	121935028	ileum_down
chr1	121965968	121967443	ileum_down
chr1	121968548	121972622	ileum_down
chr1	121977136	121977671	ileum_down
chr1	121978429	121981446	ileum_down
chr1	121981929	121982901	ileum_down
chr1	121986945	121988657	ileum_down
chr1	121989565	121990577	ileum_down
chr1	121996535	121998238	ileum_down
chr1	122001918	122002667	ileum_down
chr1	122011675	122013458	ileum_down
chr1	135942094	135943470	ileum_down
chr1	135945277	135945968	ileum_down
chr1	135950880	135955152	ileum_down
chr1	135956200	135958249	ileum_down
chr1	135960874	135962422	ileum_down
chr1	135963505	135964210	ileum_down
chr1	135966448	135968804	ileum_down
chr1	135973783	135976921	ileum_down
chr1	135982605	135984332	ileum_down
chr1	135988056	135990942	ileum_down
chr1	135992566	135993899	ileum_down
chr1	135994885	135998788	ileum_down
chr1	136001871	136003935	ileum_down
chr1	145865429	145866561	ileum_down
chr1	145962967	145963848	ileum_down
chr1	145965291	145965831	ileum_down
chr1	153599801	153604008	ileum_down
chr1	153625544	153626131	ileum_down
chr1	153667249	153668032	ileum_down
chr1	153671002	153671623	ileum_down
chr1	153710660	153711563	ileum_down
chr1	153798547	153799381	ileum_down
chr1	153831754	153832730	ileum_down
chr1	153837672	153838359	ileum_down
chr1	153871358	153873074	ileum_down
chr1	153884613	153885176	ileum_down
chr1	153886308	153888797	ileum_down
chr1	153895342	153896041	ileum_down
chr1	153931304	153932807	ileum_down
chr1	153935516	153938727	ileum_down
chr1	154137717	154138626	ileum_down
chr1	155378936	155380234	ileum_down
chr1	155396300	155397294	ileum_down
chr1	155403973	155404586	ileum_down
chr1	155406307	155407386	ileum_down
chr1	159388105	159390450	ileum_down
chr1	159444318	159444947	ileum_down
chr1	159449165	159450115	ileum_down
chr1	159454595	159455228	ileum_down
chr1	159455571	159457440	ileum_down
chr1	159491265	159491751	ileum_down
chr1	159575815	159576648	ileum_down
chr1	164722467	164723342	ileum_down
chr1	164742374	164744792	ileum_down
chr1	164745025	164746788	ileum_down
chr1	164783443	164784733	ileum_down
chr1	164788119	164790639	ileum_down
chr1	164797667	164798374	ileum_down
chr1	164801044	164802637	ileum_down
chr1	164810066	164810662	ileum_down
chr1	164815740	164817462	ileum_down
chr1	164876337	164877650	ileum_down
chr1	166092356	166094018	ileum_down
chr1	166114207	166115351	ileum_down
chr1	166116990	166117650	ileum_down
chr1	166119598	166120696	ileum_down
chr1	166134460	166135287	ileum_down
chr1	166137533	166139053	ileum_down
chr1	166140926	166141585	ileum_down
chr1	166142713	166143308	ileum_down
chr1	166145134	166145933	ileum_down
chr1	166177874	166181345	ileum_down
chr1	166190116	166191455	ileum_down
chr1	166191498	166192247	ileum_down
chr1	169279694	169281133	ileum_down
chr1	169282356	169283056	ileum_down
chr1	169283949	169285215	ileum_down
chr1	169298430	169299087	ileum_down
chr1	169299904	169300625	ileum_down
chr1	169303848	169305720	ileum_down
chr1	169307459	169309045	ileum_down
chr1	169311296	169312996	ileum_down
chr1	169314153	169314935	ileum_down
chr1	169317136	169318383	ileum_down
chr1	169321371	169321922	ileum_down
chr1	169322589	169325597	ileum_down
chr1	169344675	169345507	ileum_down
chr1	169731490	169733584	ileum_down
chr1	169826354	169827033	ileum_down
chr1	170143745	170146594	ileum_down
chr1	170149906	170152883	ileum_down
chr1	170158564	170159834	ileum_down
chr1	170159937	170162247	ileum_down
chr1	170171835	170173682	ileum_down
chr1	170173741	170174898	ileum_down
chr1	170217785	170219850	ileum_down
chr1	170252586	170253857	ileum_down
chr1	170256357	170257275	ileum_down
chr1	170273645	170276544	ileum_down
chr1	170286954	170288093	ileum_down
chr1	170292050	170293491	ileum_down
chr1	170296110	170298498	ileum_down
chr1	170310124	170313358	ileum_down
chr1	170356322	170357767	ileum_down
chr1	170361130	170363168	ileum_down
chr1	170589390	170590304	ileum_down
chr1	170638129	170640346	ileum_down
chr1	170667308	170668701	ileum_down
chr1	170688839	170689401	ileum_down
chr1	170828328	170829149	ileum_down
chr1	170897195	170898004	ileum_down
chr1	172805676	172806383	ileum_down
chr1	172812813	172813748	ileum_down
chr1	172814451	172815893	ileum_down
chr1	172816659	172817460	ileum_down
chr1	172823162	172824011	ileum_down
chr1	172824647	172825776	ileum_down
chr1	172828499	172829385	ileum_down
chr1	172830957	172832546	ileum_down
chr1	172837323	172839698	ileum_down
chr1	173130831	173131511	ileum_down
chr1	173133981	173135159	ileum_down
chr1	173143310	173145140	ileum_down
chr1	174411021	174414613	ileum_down
chr1	174417796	174422544	ileum_down
chr1	174429074	174434988	ileum_down
chr1	174439933	174441672	ileum_down
chr1	174445096	174446486	ileum_down
chr1	174549321	174549875	ileum_down
chr1	174560885	174563761	ileum_down
chr1	179383659	179384441	ileum_down
chr1	179388553	179389998	ileum_down
chr1	179399913	179401963	ileum_down
chr1	179405377	179406496	ileum_down
chr1	179408809	179410322	ileum_down
chr1	179485108	179486563	ileum_down
chr1	179487634	179489840	ileum_down
chr1	179542155	179543113	ileum_down
chr1	179551958	179554273	ileum_down
chr1	179572248	179574802	ileum_down
chr1	179614952	179615694	ileum_down
chr1	179632409	179633609	ileum_down
chr1	179638402	179639436	ileum_down
chr1	179640990	179642100	ileum_down
chr1	179644193	179644791	ileum_down
chr1	179655342	179657163	ileum_down
chr1	179657792	179659702	ileum_down
chr1	179670615	179671475	ileum_down
chr1	179672069	179672817	ileum_down
chr1	179678148	179678916	ileum_down
chr1	179724447	179727324	ileum_down
chr1	179912837	179915072	ileum_down
chr1	184731796	184733592	ileum_down
chr1	184837560	184839889	ileum_down
chr1	184856160	184857961	ileum_down
chr1	184883217	184885854	ileum_down
chr1	184886310	184891046	ileum_down
chr1	184911971	184914528	ileum_down
chr1	184920091	184921769	ileum_down
chr1	185397122	185399283	ileum_down
chr1	185480877	185481379	ileum_down
chr1	185500207	185501450	ileum_down
chr1	185525716	185527032	ileum_down
chr1	185587397	185589290	ileum_down
chr1	185602029	185602887	ileum_down
chr1	185816871	185817425	ileum_down
chr1	185821048	185821541	ileum_down
chr1	185839677	185840862	ileum_down
chr1	186647951	186648965	ileum_down
chr1	186650473	186651796	ileum_down
chr1	186668283	186671176	ileum_down
chr1	186674898	186678207	ileum_down
chr1	186681933	186683195	ileum_down
chr1	186683925	186686353	ileum_down
chr1	186693587	186696813	ileum_down
chr1	186701156	186702380	ileum_down
chr1	186704992	186707794	ileum_down
chr1	186731783	186733053	ileum_down
chr1	186735423	186736765	ileum_down
chr1	186759051	186760072	ileum_down
chr1	186786625	186787987	ileum_down
chr1	186789273	186790310	ileum_down
chr1	195110139	195111195	ileum_down
chr1	195113140	195114853	ileum_down
chr1	195115898	195116677	ileum_down
chr1	195121929	195122820	ileum_down
chr1	195124195	195126200	ileum_down
chr1	195127183	195130161	ileum_down
chr1	195137451	195139036	ileum_down
chr1	195149620	195150894	ileum_down
chr1	195151617	195155054	ileum_down
chr1	195185301	195192326	ileum_down
chr10	3132291	3136519	ileum_down
chr10	3153817	3154904	ileum_down
chr10	3155917	3157774	ileum_down
chr10	3176584	3177921	ileum_down
chr10	3186085	3188468	ileum_down
chr10	3203560	3204317	ileum_down
chr10	3205660	3206971	ileum_down
chr10	3207771	3208968	ileum_down
chr10	3214285	3215425	ileum_down
chr10	3227518	3228693	ileum_down
chr10	3232296	3233601	ileum_down
chr10	3269880	3270682	ileum_down
chr10	3290790	3291761	ileum_down
chr10	3293158	3294209	ileum_down
chr10	6506032	6506935	ileum_down
chr10	6520034	6521609	ileum_down
chr10	6526740	6527543	ileum_down
chr10	6567640	6568158	ileum_down
chr10	6568275	6570191	ileum_down
chr10	6596052	6597132	ileum_down
chr10	6598765	6600151	ileum_down
chr10	6602197	6602706	ileum_down
chr10	6604942	6606535	ileum_down
chr10	6606621	6607203	ileum_down
chr10	6627751	6628898	ileum_down
chr10	6645409	6646741	ileum_down
chr10	6753683	6755782	ileum_down
chr10	6773064	6773842	ileum_down
chr10	6793010	6793686	ileum_down
chr10	6805386	6806731	ileum_down
chr10	6814581	6815897	ileum_down
chr10	6832979	6834089	ileum_down
chr10	6838289	6838857	ileum_down
chr10	6978891	6980865	ileum_down
chr10	8435340	8436336	ileum_down
chr10	8462545	8463378	ileum_down
chr10	8504946	8507877	ileum_down
chr10	8511956	8512638	ileum_down
chr10	8514946	8515591	ileum_down
chr10	8523937	8525828	ileum_down
chr10	8548739	8549883	ileum_down
chr10	8557100	8557946	ileum_down
chr10	8604889	8606697	ileum_down
chr10	8610139	8611482	ileum_down
chr10	8614849	8615294	ileum_down
chr10	8618593	8619562	ileum_down
chr10	8624896	8625724	ileum_down
chr10	8631880	8633080	ileum_down
chr10	8634922	8636301	ileum_down
chr10	8651171	8652270	ileum_down
chr10	8653275	8654760	ileum_down
chr10	8669470	8670044	ileum_down
chr10	8678931	8680098	ileum_down
chr10	8693611	8694361	ileum_down
chr10	8836992	8838358	ileum_down
chr10	8838807	8839553	ileum_down
chr10	9294906	9296027	ileum_down
chr10	9328850	9329703	ileum_down
chr10	9394103	9397263	ileum_down
chr10	9476178	9476778	ileum_down
chr10	9479978	9480626	ileum_down
chr10	9491907	9492353	ileum_down
chr10	9514140	9515084	ileum_down
chr10	9521101	9522100	ileum_down
chr10	9583353	9584192	ileum_down
chr10	9618317	9619320	ileum_down
chr10	9619567	9622256	ileum_down
chr10	9624277	9624977	ileum_down
chr10	9628929	9629565	ileum_down
chr10	10020488	10021590	ileum_down
chr10	10026869	10027845	ileum_down
chr10	10027945	10029954	ileum_down
chr10	10040757	10041704	ileum_down
chr10	24680827	24681342	ileum_down
chr10	24717306	24717931	ileum_down
chr10	24781048	24781983	ileum_down
chr10	24802508	24803307	ileum_down
chr10	24838242	24839454	ileum_down
chr10	24841781	24842617	ileum_down
chr10	24886754	24887939	ileum_down
chr10	24894557	24895546	ileum_down
chr10	24899445	24900399	ileum_down
chr10	24902818	24903864	ileum_down
chr10	24911863	24913085	ileum_down
chr10	24916932	24921298	ileum_down
chr10	24921769	24922641	ileum_down
chr10	24938868	24939465	ileum_down
chr10	24958673	24959456	ileum_down
chr10	24969883	24970545	ileum_down
chr10	24987791	24989027	ileum_down
chr10	25016069	25017335	ileum_down
chr10	25033727	25034604	ileum_down
chr10	25059243	25059699	ileum_down
chr10	25071668	25072478	ileum_down
chr10	26214110	26214660	ileum_down
chr10	26491765	26494541	ileum_down
chr10	26495971	26497606	ileum_down
chr10	26500260	26500713	ileum_down
chr10	26517684	26520224	ileum_down
chr10	26539992	26541100	ileum_down
chr10	26548033	26549082	ileum_down
chr10	26553219	26553760	ileum_down
chr10	26574333	26574998	ileum_down
chr10	26610307	26610810	ileum_down
chr10	26639247	26639786	ileum_down
chr10	26640035	26640940	ileum_down
chr10	26714993	26716886	ileum_down
chr10	30374993	30376971	ileum_down
chr10	30432122	30432799	ileum_down
chr10	30438636	30439189	ileum_down
chr10	30521820	30523730	ileum_down
chr10	39775172	39776263	ileum_down
chr10	39782620	39783626	ileum_down
chr10	39793085	39794006	ileum_down
chr10	39797131	39798369	ileum_down
chr10	39808516	39809010	ileum_down
chr10	39810738	39811463	ileum_down
chr10	39814626	39815778	ileum_down
chr10	39855780	39856252	ileum_down
chr10	39860686	39862549	ileum_down
chr10	39870629	39872819	ileum_down
chr10	39897059	39898086	ileum_down
chr10	39899307	39900383	ileum_down
chr10	39908305	39909650	ileum_down
chr10	39932091	39933066	ileum_down
chr10	41207688	41211334	ileum_down
chr10	41224904	41225939	ileum_down
chr10	41528892	41531354	ileum_down
chr10	41540754	41542035	ileum_down
chr10	41550620	41551486	ileum_down
chr10	41587628	41588609	ileum_down
chr10	41606611	41608683	ileum_down
chr10	41616062	41617261	ileum_down
chr10	41647630	41649423	ileum_down
chr10	41652793	41653819	ileum_down
chr10	41654103	41655611	ileum_down
chr10	41672984	41673929	ileum_down
chr10	41677074	41677654	ileum_down
chr10	41677962	41680153	ileum_down
chr10	41682480	41683151	ileum_down
chr10	41686879	41687639	ileum_down
chr10	41692705	41693459	ileum_down
chr10	41700216	41701066	ileum_down
chr10	41702502	41703204	ileum_down
chr10	41704828	41705382	ileum_down
chr10	41721033	41721487	ileum_down
chr10	41721773	41722801	ileum_down
chr10	58683749	58686335	ileum_down
chr10	58703612	58704589	ileum_down
chr10	58728556	58729300	ileum_down
chr10	58732695	58733463	ileum_down
chr10	58734884	58735683	ileum_down
chr10	58736196	58736699	ileum_down
chr10	58739682	58740350	ileum_down
chr10	58753559	58755820	ileum_down
chr10	58757768	58759489	ileum_down
chr10	60478106	60483027	ileum_down
chr10	60505850	60508570	ileum_down
chr10	60512892	60515987	ileum_down
chr10	60520275	60524178	ileum_down
chr10	60526598	60528941	ileum_down
chr10	60530807	60532756	ileum_down
chr10	60534971	60535586	ileum_down
chr10	60542695	60544582	ileum_down
chr10	60548029	60548523	ileum_down
chr10	60549128	60549743	ileum_down
chr10	60551749	60553983	ileum_down
chr10	60585900	60586975	ileum_down
chr10	60605483	60606084	ileum_down
chr10	60608541	60611710	ileum_down
chr10	61873312	61874496	ileum_down
chr10	61874553	61876880	ileum_down
chr10	61877863	61879649	ileum_down
chr10	61881450	61884281	ileum_down
chr10	61884727	61885901	ileum_down
chr10	61887148	61888964	ileum_down
chr10	68834121	68834651	ileum_down
chr10	68860777	68863064	ileum_down
chr10	68996175	68997444	ileum_down
chr10	69119021	69119697	ileum_down
chr10	69124701	69125627	ileum_down
chr10	69135171	69136129	ileum_down
chr10	69152725	69154458	ileum_down
chr10	69182579	69183418	ileum_down
chr10	69243989	69244978	ileum_down
chr10	69255646	69256335	ileum_down
chr10	69256431	69257368	ileum_down
chr10	69308225	69309073	ileum_down
chr10	69332973	69333610	ileum_down
chr10	69334691	69336776	ileum_down
chr10	69350657	69351780	ileum_down
chr10	69353150	69353802	ileum_down
chr10	69370961	69371640	ileum_down
chr10	69372835	69373868	ileum_down
chr10	69378753	69380364	ileum_down
chr10	69381746	69382352	ileum_down
chr10	69386004	69390583	ileum_down
chr10	69390983	69391760	ileum_down
chr10	69398886	69401302	ileum_down
chr10	69401819	69402355	ileum_down
chr10	69403514	69404402	ileum_down
chr10	69483588	69484319	ileum_down
chr10	69497497	69498126	ileum_down
chr10	69502315	69503313	ileum_down
chr10	69522283	69524031	ileum_down
chr10	69525087	69525589	ileum_down
chr10	69529462	69530639	ileum_down
chr10	69540822	69541998	ileum_down
chr10	75026252	75029437	ileum_down
chr10	75029550	75030218	ileum_down
chr10	75030742	75032368	ileum_down
chr10	75047064	75053207	ileum_down
chr10	75058322	75059319	ileum_down
chr10	75096588	75099188	ileum_down
chr10	75099831	75108178	ileum_down
chr10	75111366	75112536	ileum_down
chr10	75112596	75120547	ileum_down
chr10	75124160	75131790	ileum_down
chr10	75145848	75148886	ileum_down
chr10	75170818	75174184	ileum_down
chr10	75198821	75201153	ileum_down
chr10	75203210	75205244	ileum_down
chr10	75205995	75207774	ileum_down
chr10	75252009	75253168	ileum_down
chr10	75259728	75261741	ileum_down
chr10	75494524	75496386	ileum_down
chr10	75529588	75530011	ileum_down
chr10	75534142	75534707	ileum_down
chr10	75534813	75535320	ileum_down
chr10	75549182	75549826	ileum_down
chr10	75559229	75560703	ileum_down
chr10	75564766	75565575	ileum_down
chr10	75573426	75574236	ileum_down
chr10	75580233	75581961	ileum_down
chr10	75582287	75583519	ileum_down
chr10	75589160	75590239	ileum_down
chr10	75609411	75610649	ileum_down
chr10	75619776	75621498	ileum_down
chr10	75649844	75650712	ileum_down
chr10	75664657	75665475	ileum_down
chr10	75665992	75667234	ileum_down
chr10	75680730	75681758	ileum_down
chr10	75692163	75693713	ileum_down
chr10	75959877	75960600	ileum_down
chr10	75975906	75976421	ileum_down
chr10	75987887	75988369	ileum_down
chr10	75993292	75995041	ileum_down
chr10	75999604	76001362	ileum_down
chr10	77718214	77719197	ileum_down
chr10	77720200	77721712	ileum_down
chr10	77741795	77742597	ileum_down
chr10	77748291	77751506	ileum_down
chr10	77765798	77767210	ileum_down
chr10	77768520	77771977	ileum_down
chr10	77773591	77775872	ileum_down
chr10	77785270	77788125	ileum_down
chr10	77788194	77789783	ileum_down
chr10	77811700	77816952	ileum_down
chr10	77828608	77831539	ileum_down
chr10	77834127	77837384	ileum_down
chr10	77854651	77855586	ileum_down
chr10	77858325	77859760	ileum_down
chr10	77871855	77876311	ileum_down
chr10	77887606	77890284	ileum_down
chr10	77897306	77901814	ileum_down
chr10	77902851	77905065	ileum_down
chr10	77916615	77918583	ileum_down
chr10	77920146	77922369	ileum_down
chr10	77922602	77923951	ileum_down
chr10	77924099	77928527	ileum_down
chr10	77944053	77947046	ileum_down
chr10	77949358	77950993	ileum_down
chr10	77982256	77984024	ileum_down
chr10	78003578	78004173	ileum_down
chr10	78036676	78040235	ileum_down
chr10	78051663	78055148	ileum_down
chr10	79513456	79521867	ileum_down
chr10	79529129	79539686	ileum_down
chr10	79542434	79544707	ileum_down
chr10	79544728	79546389	ileum_down
chr10	79555249	79556285	ileum_down
chr10	79557016	79560736	ileum_down
chr10	79560941	79562245	ileum_down
chr10	79563199	79565818	ileum_down
chr10	79711344	79713979	ileum_down
chr10	79722006	79724886	ileum_down
chr10	79727006	79728824	ileum_down
chr10	79785344	79788290	ileum_down
chr10	79790941	79796810	ileum_down
chr10	79802659	79803614	ileum_down
chr10	79803977	79808576	ileum_down
chr10	79810042	79812384	ileum_down
chr10	79812884	79813988	ileum_down
chr10	79814460	79815756	ileum_down
chr10	80543453	80546498	ileum_down
chr10	80552626	80557279	ileum_down
chr10	80557647	80558645	ileum_down
chr10	80564174	80564675	ileum_down
chr10	80565012	80566239	ileum_down
chr10	80566304	80567119	ileum_down
chr10	84587742	84588673	ileum_down
chr10	84590207	84591708	ileum_down
chr10	84622861	84623438	ileum_down
chr10	84624431	84624904	ileum_down
chr10	84637012	84637914	ileum_down
chr10	84645941	84649511	ileum_down
chr10	85483913	85485961	ileum_down
chr10	85526549	85529682	ileum_down
chr10	85536500	85538783	ileum_down
chr10	85555745	85557370	ileum_down
chr10	85644191	85646197	ileum_down
chr10	85756105	85759992	ileum_down
chr10	85762238	85766954	ileum_down
chr10	85772980	85773905	ileum_down
chr10	85798790	85803598	ileum_down
chr10	85804826	85807911	ileum_down
chr10	85808233	85809649	ileum_down
chr10	85819047	85820281	ileum_down
chr10	85914382	85916702	ileum_down
chr10	85922172	85923603	ileum_down
chr10	85926120	85927248	ileum_down
chr10	85931198	85932986	ileum_down
chr10	85960197	85962276	ileum_down
chr10	88789121	88790232	ileum_down
chr10	88846193	88846686	ileum_down
chr10	88886817	88887418	ileum_down
chr10	88887539	88888589	ileum_down
chr10	88901477	88902861	ileum_down
chr10	88904653	88905116	ileum_down
chr10	88905298	88907188	ileum_down
chr10	88921126	88922460	ileum_down
chr10	88945950	88947340	ileum_down
chr10	88949628	88950163	ileum_down
chr10	88952356	88952909	ileum_down
chr10	88954083	88954576	ileum_down
chr10	88954864	88955539	ileum_down
chr10	88967526	88968565	ileum_down
chr10	93082867	93084298	ileum_down
chr10	93086273	93087463	ileum_down
chr10	93092893	93093885	ileum_down
chr10	93102878	93106085	ileum_down
chr10	93128731	93129597	ileum_down
chr10	93130919	93131435	ileum_down
chr10	93144445	93146251	ileum_down
chr10	93186749	93187543	ileum_down
chr10	93215495	93216422	ileum_down
chr10	93224548	93225284	ileum_down
chr10	93239977	93240733	ileum_down
chr10	93265567	93266599	ileum_down
chr10	93275415	93276264	ileum_down
chr10	93281219	93281876	ileum_down
chr10	95024266	95027469	ileum_down
chr10	95052634	95053606	ileum_down
chr10	95057246	95059343	ileum_down
chr10	95060296	95061560	ileum_down
chr10	95073148	95073967	ileum_down
chr10	95085461	95086856	ileum_down
chr10	95087515	95088875	ileum_down
chr10	95089780	95090835	ileum_down
chr10	95094135	95095071	ileum_down
chr10	95101854	95102982	ileum_down
chr10	95105298	95106168	ileum_down
chr10	95106382	95107571	ileum_down
chr10	95109072	95110376	ileum_down
chr10	95127223	95127882	ileum_down
chr10	95134665	95135844	ileum_down
chr10	95143007	95144219	ileum_down
chr10	95152173	95152983	ileum_down
chr10	95153648	95154872	ileum_down
chr10	95161594	95162617	ileum_down
chr10	95174713	95175379	ileum_down
chr10	95177052	95179377	ileum_down
chr10	95192371	95192991	ileum_down
chr10	95197487	95197949	ileum_down
chr10	95207569	95208592	ileum_down
chr10	95209667	95211437	ileum_down
chr10	95222603	95223986	ileum_down
chr10	95225170	95226197	ileum_down
chr10	95226286	95227539	ileum_down
chr10	95240723	95244323	ileum_down
chr10	95251750	95252272	ileum_down
chr10	95312934	95313994	ileum_down
chr10	95314410	95315066	ileum_down
chr10	95320598	95321228	ileum_down
chr10	95326942	95327959	ileum_down
chr10	95342340	95343701	ileum_down
chr10	95356601	95358279	ileum_down
chr10	95360977	95362287	ileum_down
chr10	97477518	97478685	ileum_down
chr10	97710980	97711452	ileum_down
chr10	97833291	97834074	ileum_down
chr10	97921977	97922491	ileum_down
chr10	97923300	97924847	ileum_down
chr10	97956953	97957416	ileum_down
chr10	97958713	97959511	ileum_down
chr10	97971042	97971776	ileum_down
chr10	98056078	98057452	ileum_down
chr10	98073092	98073621	ileum_down
chr10	98114133	98115401	ileum_down
chr10	98128366	98129538	ileum_down
chr10	98130322	98130931	ileum_down
chr10	98131272	98132270	ileum_down
chr10	98139404	98140150	ileum_down
chr10	98140776	98141411	ileum_down
chr10	98146724	98147560	ileum_down
chr10	98148891	98149445	ileum_down
chr10	98157412	98158410	ileum_down
chr10	98166375	98167794	ileum_down
chr10	98188419	98189259	ileum_down
chr10	98206457	98207325	ileum_down
chr10	98214282	98214819	ileum_down
chr10	98225609	98226197	ileum_down
chr10	98262035	98263361	ileum_down
chr10	98266627	98267783	ileum_down
chr10	98271165	98271976	ileum_down
chr10	98291585	98292629	ileum_down
chr10	98302886	98303654	ileum_down
chr10	98317057	98317858	ileum_down
chr10	98326920	98328128	ileum_down
chr10	98330784	98331987	ileum_down
chr10	98342678	98343199	ileum_down
chr10	98353313	98354148	ileum_down
chr10	98360132	98361313	ileum_down
chr10	98376143	98379542	ileum_down
chr10	98381857	98382491	ileum_down
chr10	98387688	98388229	ileum_down
chr10	98435617	98436348	ileum_down
chr10	98436425	98436989	ileum_down
chr10	98437179	98437870	ileum_down
chr10	98547264	98548497	ileum_down
chr10	98559666	98560735	ileum_down
chr10	110909573	110911591	ileum_down
chr10	110927049	110927923	ileum_down
chr10	110939856	110941242	ileum_down
chr10	110942332	110945577	ileum_down
chr10	110951761	110953881	ileum_down
chr10	110980470	110983245	ileum_down
chr10	110989847	110991051	ileum_down
chr10	110999086	111000567	ileum_down
chr10	111011773	111014243	ileum_down
chr10	111015513	111016073	ileum_down
chr10	111019301	111021326	ileum_down
chr10	111024921	111025983	ileum_down
chr10	111031509	111033307	ileum_down
chr10	111076479	111078036	ileum_down
chr10	111109228	111110494	ileum_down
chr10	111113151	111113869	ileum_down
chr10	111121315	111122866	ileum_down
chr10	111182969	111184533	ileum_down
chr10	111206459	111208269	ileum_down
chr10	111232104	111233436	ileum_down
chr10	111270900	111272897	ileum_down
chr10	111273268	111274802	ileum_down
chr10	111294980	111296080	ileum_down
chr10	111362404	111363263	ileum_down
chr10	111394288	111395214	ileum_down
chr10	116829961	116831041	ileum_down
chr10	116854149	116856337	ileum_down
chr10	116869223	116870117	ileum_down
chr10	116872010	116874412	ileum_down
chr10	116888965	116890683	ileum_down
chr10	116891864	116894753	ileum_down
chr10	116931014	116931972	ileum_down
chr10	116952131	116953714	ileum_down
chr10	116955803	116957456	ileum_down
chr10	116979913	116980648	ileum_down
chr10	116996205	116997390	ileum_down
chr10	116998783	117000610	ileum_down
chr10	117007974	117009537	ileum_down
chr10	117012419	117013800	ileum_down
chr10	117025266	117027808	ileum_down
chr10	117031815	117034466	ileum_down
chr10	117037823	117039138	ileum_down
chr10	117062246	117063339	ileum_down
chr10	117065186	117067853	ileum_down
chr10	117076586	117078064	ileum_down
chr10	117080518	117082260	ileum_down
chr10	117091461	117092722	ileum_down
chr10	117099529	117101544	ileum_down
chr10	117106374	117107750	ileum_down
chr10	117113884	117114435	ileum_down
chr10	117146407	117148329	ileum_down
chr10	117154558	117155961	ileum_down
chr10	117158468	117159055	ileum_down
chr10	117168147	117169061	ileum_down
chr10	117173737	117174797	ileum_down
chr10	117182379	117183826	ileum_down
chr10	117201489	117202148	ileum_down
chr10	117219726	117220231	ileum_down
chr10	117228670	117230815	ileum_down
chr10	126568777	126570659	ileum_down
chr10	126575455	126576653	ileum_down
chr10	126587404	126588182	ileum_down
chr10	126591277	126591737	ileum_down
chr10	126594894	126596174	ileum_down
chr10	126601682	126605518	ileum_down
chr10	126607571	126609724	ileum_down
chr10	126613013	126618268	ileum_down
chr10	127102099	127105624	ileum_down
chr10	127190934	127194677	ileum_down
chr10	127195795	127197127	ileum_down
chr10	127200594	127203099	ileum_down
chr10	127212231	127214016	ileum_down
chr10	127309418	127309972	ileum_down
chr10	127313831	127317497	ileum_down
chr10	127323474	127324476	ileum_down
chr10	127325532	127326475	ileum_down
chr10	127329951	127331390	ileum_down
chr10	128369828	128371870	ileum_down
chr10	128374827	128376754	ileum_down
chr10	128382229	128384083	ileum_down
chr10	128396603	128398803	ileum_down
chr10	128401684	128403286	ileum_down
chr10	128407728	128408377	ileum_down
chr10	128414353	128415112	ileum_down
chr11	3821281	3821995	ileum_down
chr11	3829929	3833049	ileum_down
chr11	3837256	3838155	ileum_down
chr11	3881845	3886040	ileum_down
chr11	3888371	3889151	ileum_down
chr11	3901436	3902060	ileum_down
chr11	6314498	6316993	ileum_down
chr11	6320355	6320899	ileum_down
chr11	6336418	6336974	ileum_down
chr11	6338898	6339602	ileum_down
chr11	6343818	6345046	ileum_down
chr11	6374304	6376660	ileum_down
chr11	11720015	11721196	ileum_down
chr11	11725017	11726418	ileum_down
chr11	11784696	11785822	ileum_down
chr11	11792659	11794368	ileum_down
chr11	11796917	11799236	ileum_down
chr11	11801090	11802188	ileum_down
chr11	11827931	11829403	ileum_down
chr11	11842332	11843124	ileum_down
chr11	11873314	11873922	ileum_down
chr11	11874691	11875339	ileum_down
chr11	11925423	11927008	ileum_down
chr11	11936378	11938325	ileum_down
chr11	12130818	12136381	ileum_down
chr11	12215922	12216481	ileum_down
chr11	12231781	12232709	ileum_down
chr11	12290058	12292939	ileum_down
chr11	12304743	12305273	ileum_down
chr11	12305426	12306482	ileum_down
chr11	12309332	12310133	ileum_down
chr11	12311251	12312577	ileum_down
chr11	12342108	12343118	ileum_down
chr11	12363614	12365817	ileum_down
chr11	12368522	12369415	ileum_down
chr11	12395554	12396324	ileum_down
chr11	12416293	12416819	ileum_down
chr11	12431943	12432965	ileum_down
chr11	12711077	12712110	ileum_down
chr11	12772254	12773187	ileum_down
chr11	12773709	12774202	ileum_down
chr11	22134635	22135173	ileum_down
chr11	22166955	22167495	ileum_down
chr11	22185950	22188284	ileum_down
chr11	22337129	22339426	ileum_down
chr11	22353079	22353750	ileum_down
chr11	22354154	22354725	ileum_down
chr11	22871672	22874214	ileum_down
chr11	22880897	22882812	ileum_down
chr11	22887280	22887728	ileum_down
chr11	29509842	29510548	ileum_down
chr11	29512192	29515209	ileum_down
chr11	29537963	29538672	ileum_down
chr11	29591997	29594541	ileum_down
chr11	29618397	29618968	ileum_down
chr11	29670615	29672865	ileum_down
chr11	29687322	29687887	ileum_down
chr11	29693090	29694141	ileum_down
chr11	29700791	29702508	ileum_down
chr11	29708142	29709038	ileum_down
chr11	29723846	29726599	ileum_down
chr11	35264974	35265644	ileum_down
chr11	35418249	35420024	ileum_down
chr11	35480632	35483971	ileum_down
chr11	35505682	35507533	ileum_down
chr11	35507685	35510066	ileum_down
chr11	35545763	35546354	ileum_down
chr11	35547775	35549361	ileum_down
chr11	35550383	35551878	ileum_down
chr11	35562974	35564901	ileum_down
chr11	35568473	35569627	ileum_down
chr11	35572254	35573144	ileum_down
chr11	35573384	35574812	ileum_down
chr11	35582521	35583991	ileum_down
chr11	35584113	35584690	ileum_down
chr11	35596305	35596942	ileum_down
chr11	49061839	49062738	ileum_down
chr11	49063084	49065279	ileum_down
chr11	49073853	49076926	ileum_down
chr11	49091358	49092217	ileum_down
chr11	50035998	50041814	ileum_down
chr11	50042054	50045392	ileum_down
chr11	50049450	50052797	ileum_down
chr11	50075144	50075947	ileum_down
chr11	50079264	50081277	ileum_down
chr11	50103808	50106755	ileum_down
chr11	50872217	50874012	ileum_down
chr11	50874210	50875122	ileum_down
chr11	53163626	53165924	ileum_down
chr11	53231425	53232084	ileum_down
chr11	53235960	53237313	ileum_down
chr11	53239037	53239891	ileum_down
chr11	53269823	53272203	ileum_down
chr11	53279195	53280837	ileum_down
chr11	53282638	53284327	ileum_down
chr11	53291389	53294082	ileum_down
chr11	53296578	53297866	ileum_down
chr11	53299390	53301407	ileum_down
chr11	53313895	53314572	ileum_down
chr11	53801415	53802964	ileum_down
chr11	53815481	53820259	ileum_down
chr11	53834352	53838720	ileum_down
chr11	53839793	53842840	ileum_down
chr11	53846096	53847174	ileum_down
chr11	53867535	53868406	ileum_down
chr11	53868613	53870427	ileum_down
chr11	53870708	53877479	ileum_down
chr11	53878711	53887940	ileum_down
chr11	54672588	54675351	ileum_down
chr11	54679431	54681915	ileum_down
chr11	57457166	57461365	ileum_down
chr11	57465762	57472828	ileum_down
chr11	57477470	57479525	ileum_down
chr11	57499130	57503790	ileum_down
chr11	57505059	57505964	ileum_down
chr11	57507827	57508577	ileum_down
chr11	57514254	57516223	ileum_down
chr11	57521487	57523304	ileum_down
chr11	57523389	57526685	ileum_down
chr11	57538114	57541742	ileum_down
chr11	57545266	57547341	ileum_down
chr11	57555047	57558577	ileum_down
chr11	57559463	57562064	ileum_down
chr11	57577667	57581677	ileum_down
chr11	57583028	57584956	ileum_down
chr11	57589204	57594045	ileum_down
chr11	57595340	57596526	ileum_down
chr11	57599214	57602052	ileum_down
chr11	57604298	57605513	ileum_down
chr11	57613591	57619050	ileum_down
chr11	57622380	57623773	ileum_down
chr11	57633139	57634243	ileum_down
chr11	57640127	57644220	ileum_down
chr11	59952244	59955248	ileum_down
chr11	59962110	59963570	ileum_down
chr11	59988529	60005317	ileum_down
chr11	60012585	60018857	ileum_down
chr11	60021385	60026327	ileum_down
chr11	60030882	60031634	ileum_down
chr11	60032955	60034786	ileum_down
chr11	60035002	60041077	ileum_down
chr11	60041373	60045643	ileum_down
chr11	60046709	60048140	ileum_down
chr11	60048754	60050524	ileum_down
chr11	60053826	60055262	ileum_down
chr11	60057767	60059804	ileum_down
chr11	60064406	60066065	ileum_down
chr11	60115084	60116685	ileum_down
chr11	60118660	60119892	ileum_down
chr11	60123262	60123784	ileum_down
chr11	60137269	60137690	ileum_down
chr11	60149242	60150727	ileum_down
chr11	60152754	60153401	ileum_down
chr11	60158966	60159603	ileum_down
chr11	61025303	61026757	ileum_down
chr11	61044542	61045809	ileum_down
chr11	61047744	61051782	ileum_down
chr11	61079692	61083014	ileum_down
chr11	61084927	61085727	ileum_down
chr11	61121281	61121780	ileum_down
chr11	61132368	61134010	ileum_down
chr11	61155247	61157150	ileum_down
chr11	61162664	61163901	ileum_down
chr11	61165172	61166720	ileum_down
chr11	61166967	61168335	ileum_down
chr11	61181863	61183255	ileum_down
chr11	61191067	61193176	ileum_down
chr11	61201265	61202418	ileum_down
chr11	61216484	61217394	ileum_down
chr11	61220823	61222538	ileum_down
chr11	61223303	61224107	ileum_down
chr11	61230812	61231956	ileum_down
chr11	62269849	62272614	ileum_down
chr11	62280112	62280612	ileum_down
chr11	62286991	62287383	ileum_down
chr11	62300243	62301896	ileum_down
chr11	62307801	62310227	ileum_down
chr11	62310538	62311237	ileum_down
chr11	62313649	62314813	ileum_down
chr11	62324829	62325841	ileum_down
chr11	62335700	62336249	ileum_down
chr11	62346951	62347873	ileum_down
chr11	62351681	62353227	ileum_down
chr11	62898274	62899070	ileum_down
chr11	62912505	62913422	ileum_down
chr11	62942265	62952045	ileum_down
chr11	62977121	62979214	ileum_down
chr11	63026163	63027929	ileum_down
chr11	63044742	63048028	ileum_down
chr11	63065404	63066116	ileum_down
chr11	63077521	63078868	ileum_down
chr11	63095074	63097132	ileum_down
chr11	63217986	63218804	ileum_down
chr11	63225885	63227335	ileum_down
chr11	63691748	63693125	ileum_down
chr11	63706746	63708414	ileum_down
chr11	63715903	63718966	ileum_down
chr11	63727202	63728591	ileum_down
chr11	63731736	63740096	ileum_down
chr11	66844264	66845766	ileum_down
chr11	66849664	66850231	ileum_down
chr11	66856278	66856955	ileum_down
chr11	66858265	66858969	ileum_down
chr11	66865036	66867778	ileum_down
chr11	69712005	69717351	ileum_down
chr11	69984480	69985885	ileum_down
chr11	70014908	70015694	ileum_down
chr11	70022189	70023251	ileum_down
chr11	70025193	70029853	ileum_down
chr11	70033577	70036351	ileum_down
chr11	70036842	70037405	ileum_down
chr11	70039163	70041644	ileum_down
chr11	70041993	70044696	ileum_down
chr11	70278612	70280544	ileum_down
chr11	70286153	70287603	ileum_down
chr11	70288315	70289626	ileum_down
chr11	70293559	70294846	ileum_down
chr11	70307575	70308195	ileum_down
chr11	70313179	70314384	ileum_down
chr11	70318186	70320470	ileum_down
chr11	70322554	70324103	ileum_down
chr11	70459220	70461810	ileum_down
chr11	70463754	70466014	ileum_down
chr11	76667501	76669048	ileum_down
chr11	76669407	76671623	ileum_down
chr11	76701495	76702162	ileum_down
chr11	76702804	76703933	ileum_down
chr11	76705960	76708297	ileum_down
chr11	76711404	76712597	ileum_down
chr11	76715071	76715891	ileum_down
chr11	76718550	76719037	ileum_down
chr11	76721997	76722685	ileum_down
chr11	76729792	76731356	ileum_down
chr11	76736679	76737309	ileum_down
chr11	76738230	76738700	ileum_down
chr11	76766956	76767437	ileum_down
chr11	76809804	76812743	ileum_down
chr11	76817114	76818588	ileum_down
chr11	76818762	76820738	ileum_down
chr11	76822320	76823688	ileum_down
chr11	76823887	76825951	ileum_down
chr11	76832627	76833724	ileum_down
chr11	76833781	76834356	ileum_down
chr11	76834644	76836316	ileum_down
chr11	76837582	76838253	ileum_down
chr11	77550687	77551288	ileum_down
chr11	77557306	77558086	ileum_down
chr11	77565462	77566509	ileum_down
chr11	77576231	77579454	ileum_down
chr11	77579719	77580886	ileum_down
chr11	77585269	77586848	ileum_down
chr11	77596663	77598721	ileum_down
chr11	77598806	77600454	ileum_down
chr11	77605219	77607473	ileum_down
chr11	77614418	77615388	ileum_down
chr11	77626845	77632848	ileum_down
chr11	77633202	77637928	ileum_down
chr11	77638404	77641865	ileum_down
chr11	77647254	77650967	ileum_down
chr11	77653290	77663096	ileum_down
chr11	77666483	77669184	ileum_down
chr11	77670833	77676338	ileum_down
chr11	77697122	77699458	ileum_down
chr11	77706350	77710180	ileum_down
chr11	77907615	77909242	ileum_down
chr11	77911280	77912207	ileum_down
chr11	77927858	77929885	ileum_down
chr11	77942582	77943919	ileum_down
chr11	77948785	77949334	ileum_down
chr11	77972358	77975106	ileum_down
chr11	77975401	77980738	ileum_down
chr11	77985622	77986744	ileum_down
chr11	77989494	77993500	ileum_down
chr11	78135544	78137813	ileum_down
chr11	78207423	78216379	ileum_down
chr11	78221659	78224406	ileum_down
chr11	78230249	78231454	ileum_down
chr11	78231606	78232358	ileum_down
chr11	78234634	78236963	ileum_down
chr11	78240907	78241641	ileum_down
chr11	78243687	78245182	ileum_down
chr11	78246909	78248736	ileum_down
chr11	78248980	78250012	ileum_down
chr11	78251693	78252537	ileum_down
chr11	78254674	78255968	ileum_down
chr11	78267907	78269925	ileum_down
chr11	80598925	80599842	ileum_down
chr11	80603079	80604249	ileum_down
chr11	80605086	80606351	ileum_down
chr11	80612203	80614128	ileum_down
chr11	80615662	80617340	ileum_down
chr11	80619962	80625038	ileum_down
chr11	80631065	80632959	ileum_down
chr11	80633169	80635542	ileum_down
chr11	80648756	80650657	ileum_down
chr11	80661048	80662443	ileum_down
chr11	80665279	80669280	ileum_down
chr11	83552589	83553224	ileum_down
chr11	83561019	83562940	ileum_down
chr11	87880691	87883136	ileum_down
chr11	87899920	87901181	ileum_down
chr11	87911552	87914783	ileum_down
chr11	87930702	87933483	ileum_down
chr11	87950774	87952589	ileum_down
chr11	87964269	87965704	ileum_down
chr11	87973498	87976053	ileum_down
chr11	87976257	87977381	ileum_down
chr11	87977902	87980343	ileum_down
chr11	87999468	88002601	ileum_down
chr11	88005139	88008599	ileum_down
chr11	90030642	90031914	ileum_down
chr11	90044325	90045103	ileum_down
chr11	90045671	90046712	ileum_down
chr11	90057175	90058652	ileum_down
chr11	90067112	90067552	ileum_down
chr11	90068633	90069355	ileum_down
chr11	90081536	90082603	ileum_down
chr11	90085983	90087457	ileum_down
chr11	90092727	90093776	ileum_down
chr11	90109789	90112108	ileum_down
chr11	90112942	90114708	ileum_down
chr11	90129658	90132375	ileum_down
chr11	90135380	90136105	ileum_down
chr11	90144360	90145342	ileum_down
chr11	90149060	90149768	ileum_down
chr11	90168069	90169101	ileum_down
chr11	90178511	90179303	ileum_down
chr11	90203480	90204633	ileum_down
chr11	90215815	90220398	ileum_down
chr11	90224763	90225941	ileum_down
chr11	90230383	90232783	ileum_down
chr11	90249530	90253841	ileum_down
chr11	90278348	90279940	ileum_down
chr11	90382078	90382919	ileum_down
chr11	90399770	90400613	ileum_down
chr11	94893517	94896670	ileum_down
chr11	94899622	94904068	ileum_down
chr11	94906642	94908986	ileum_down
chr11	94928654	94929294	ileum_down
chr11	94930729	94934717	ileum_down
chr11	94934989	94938754	ileum_down
chr11	95612232	95612942	ileum_down
chr11	95629270	95630047	ileum_down
chr11	95631815	95633420	ileum_down
chr11	95637889	95640804	ileum_down
chr11	95649924	95651949	ileum_down
chr11	95656914	95658968	ileum_down
chr11	95661236	95662500	ileum_down
chr11	95666062	95667526	ileum_down
chr11	95680493	95681133	ileum_down
chr11	95682639	95683398	ileum_down
chr11	95684241	95686707	ileum_down
chr11	95687869	95693007	ileum_down
chr11	95693509	95700833	ileum_down
chr11	95985225	95986452	ileum_down
chr11	95988223	95988747	ileum_down
chr11	95994647	95995766	ileum_down
chr11	95996441	95997890	ileum_down
chr11	96001515	96003051	ileum_down
chr11	96006421	96007855	ileum_down
chr11	96008364	96009906	ileum_down
chr11	96031776	96035804	ileum_down
chr11	96042593	96043089	ileum_down
chr11	96047123	96050941	ileum_down
chr11	96878934	96881219	ileum_down
chr11	96881627	96884574	ileum_down
chr11	96886813	96887860	ileum_down
chr11	96890855	96892554	ileum_down
chr11	97544642	97549254	ileum_down
chr11	97551000	97551908	ileum_down
chr11	97555716	97557808	ileum_down
chr11	97558926	97562751	ileum_down
chr11	97563549	97565527	ileum_down
chr11	98306606	98312807	ileum_down
chr11	98317760	98321829	ileum_down
chr11	98331097	98332688	ileum_down
chr11	98601231	98604798	ileum_down
chr11	98608258	98613347	ileum_down
chr11	98613565	98616750	ileum_down
chr11	98623981	98626350	ileum_down
chr11	98630414	98632399	ileum_down
chr11	98632734	98635878	ileum_down
chr11	98635992	98637953	ileum_down
chr11	98638036	98638951	ileum_down
chr11	98643869	98645228	ileum_down
chr11	98647598	98648775	ileum_down
chr11	98650011	98651687	ileum_down
chr11	99104649	99105894	ileum_down
chr11	99129857	99131249	ileum_down
chr11	99274514	99275117	ileum_down
chr11	99275151	99276732	ileum_down
chr11	99297439	99298581	ileum_down
chr11	99304193	99305096	ileum_down
chr11	99315294	99316667	ileum_down
chr11	99319961	99320911	ileum_down
chr11	99322707	99323925	ileum_down
chr11	99324415	99324900	ileum_down
chr11	99325856	99326873	ileum_down
chr11	99333202	99334131	ileum_down
chr11	99334588	99335264	ileum_down
chr11	99349909	99351504	ileum_down
chr11	99351857	99352952	ileum_down
chr11	99353090	99355606	ileum_down
chr11	99357483	99358446	ileum_down
chr11	100869315	100872169	ileum_down
chr11	100891746	100892763	ileum_down
chr11	100913396	100915050	ileum_down
chr11	100916081	100917685	ileum_down
chr11	100917921	100919651	ileum_down
chr11	100923480	100926247	ileum_down
chr11	100928007	100928827	ileum_down
chr11	100930692	100932085	ileum_down
chr11	100942115	100945112	ileum_down
chr11	101114032	101116018	ileum_down
chr11	101120032	101124736	ileum_down
chr11	101130580	101131618	ileum_down
chr11	101312995	101314176	ileum_down
chr11	101315580	101317258	ileum_down
chr11	101323559	101327836	ileum_down
chr11	101328651	101330811	ileum_down
chr11	101340191	101341163	ileum_down
chr11	101341612	101342930	ileum_down
chr11	101351317	101351813	ileum_down
chr11	101368303	101369102	ileum_down
chr11	101380243	101381515	ileum_down
chr11	101404767	101405584	ileum_down
chr11	101417769	101418532	ileum_down
chr11	101429622	101430766	ileum_down
chr11	101443261	101444404	ileum_down
chr11	101450161	101453125	ileum_down
chr11	101463797	101464269	ileum_down
chr11	101465617	101466664	ileum_down
chr11	101478217	101478839	ileum_down
chr11	101502221	101503980	ileum_down
chr11	101506425	101507950	ileum_down
chr11	101518575	101520736	ileum_down
chr11	101524602	101525331	ileum_down
chr11	101526315	101527513	ileum_down
chr11	101529109	101531264	ileum_down
chr11	101534164	101535359	ileum_down
chr11	101536091	101537222	ileum_down
chr11	101565049	101566476	ileum_down
chr11	101574096	101575666	ileum_down
chr11	102050439	102052923	ileum_down
chr11	102068858	102071998	ileum_down
chr11	102074685	102084358	ileum_down
chr11	102088937	102092173	ileum_down
chr11	102096446	102097115	ileum_down
chr11	102102320	102103377	ileum_down
chr11	102958337	102959204	ileum_down
chr11	102962266	102967528	ileum_down
chr11	102972466	102974237	ileum_down
chr11	105864861	105868068	ileum_down
chr11	105868989	105871544	ileum_down
chr11	105880854	105882245	ileum_down
chr11	105885932	105889167	ileum_down
chr11	106637477	106639371	ileum_down
chr11	106640055	106641722	ileum_down
chr11	109286394	109288410	ileum_down
chr11	109300530	109302857	ileum_down
chr11	109306738	109307481	ileum_down
chr11	109332314	109336204	ileum_down
chr11	109720726	109722543	ileum_down
chr11	109755041	109755944	ileum_down
chr11	109759994	109760733	ileum_down
chr11	109764388	109765135	ileum_down
chr11	109768962	109770438	ileum_down
chr11	109784211	109785143	ileum_down
chr11	109794464	109794960	ileum_down
chr11	109824112	109825025	ileum_down
chr11	109831340	109832605	ileum_down
chr11	109844841	109845286	ileum_down
chr11	109855540	109857553	ileum_down
chr11	109890217	109891136	ileum_down
chr11	109921358	109921893	ileum_down
chr11	109934918	109935435	ileum_down
chr11	110925851	110928792	ileum_down
chr11	110931575	110932191	ileum_down
chr11	110950040	110950683	ileum_down
chr11	110951453	110952076	ileum_down
chr11	110969275	110969987	ileum_down
chr11	110987259	110987712	ileum_down
chr11	111100886	111102117	ileum_down
chr11	111107498	111108008	ileum_down
chr11	111285680	111286789	ileum_down
chr11	111287850	111288672	ileum_down
chr11	111306780	111307594	ileum_down
chr11	111376731	111377443	ileum_down
chr11	111384713	111385245	ileum_down
chr11	111398635	111399398	ileum_down
chr11	111548111	111550210	ileum_down
chr11	111808734	111809511	ileum_down
chr11	111839694	111840325	ileum_down
chr11	115175453	115176343	ileum_down
chr11	115179175	115185647	ileum_down
chr11	115306054	115306961	ileum_down
chr11	115307518	115312184	ileum_down
chr11	115317169	115320597	ileum_down
chr11	115322872	115326500	ileum_down
chr11	115344612	115345478	ileum_down
chr11	115351764	115353914	ileum_down
chr11	115355503	115356580	ileum_down
chr11	115370137	115372226	ileum_down
chr11	115372948	115376164	ileum_down
chr11	115575766	115576296	ileum_down
chr11	115577415	115578687	ileum_down
chr11	115583767	115585147	ileum_down
chr11	115595189	115596057	ileum_down
chr11	115599113	115600710	ileum_down
chr11	115607884	115609240	ileum_down
chr11	115613891	115615341	ileum_down
chr11	115626327	115628665	ileum_down
chr11	115640005	115642396	ileum_down
chr11	115645959	115648043	ileum_down
chr11	115667002	115677219	ileum_down
chr11	115835567	115839415	ileum_down
chr11	115865797	115868756	ileum_down
chr11	115872785	115874619	ileum_down
chr11	115884758	115886347	ileum_down
chr11	116531775	116534332	ileum_down
chr11	116535593	116537149	ileum_down
chr11	116543507	116546091	ileum_down
chr11	116551500	116553143	ileum_down
chr11	116554867	116557660	ileum_down
chr11	116574598	116576563	ileum_down
chr11	116606253	116607025	ileum_down
chr11	116610005	116613233	ileum_down
chr11	116614176	116616321	ileum_down
chr11	116631000	116631932	ileum_down
chr11	119213581	119218515	ileum_down
chr11	119224399	119225581	ileum_down
chr11	119236589	119237445	ileum_down
chr11	119247600	119248071	ileum_down
chr11	119250737	119257256	ileum_down
chr11	119265617	119266641	ileum_down
chr11	120344723	120347443	ileum_down
chr11	120349184	120351403	ileum_down
chr11	120351935	120355115	ileum_down
chr11	120361216	120362693	ileum_down
chr11	120367639	120370145	ileum_down
chr11	120371047	120372416	ileum_down
chr11	120376727	120377731	ileum_down
chr11	120379293	120380502	ileum_down
chr11	120469212	120472617	ileum_down
chr11	120476425	120477608	ileum_down
chr11	120477806	120480370	ileum_down
chr11	120533376	120535884	ileum_down
chr11	120540786	120542847	ileum_down
chr11	120553005	120555484	ileum_down
chr11	120564709	120566219	ileum_down
chr11	120567899	120571571	ileum_down
chr11	120580812	120585401	ileum_down
chr11	120586536	120589201	ileum_down
chr11	120590217	120595311	ileum_down
chr11	120666193	120668436	ileum_down
chr11	120680942	120687388	ileum_down
chr11	120694911	120695862	ileum_down
chr11	120701941	120702971	ileum_down
chr11	120711531	120717835	ileum_down
chr11	120763015	120765447	ileum_down
chr11	120766595	120767456	ileum_down
chr11	120777023	120777515	ileum_down
chr11	121037173	121038608	ileum_down
chr11	121062338	121063721	ileum_down
chr11	121064355	121066932	ileum_down
chr11	121089097	121091337	ileum_down
chr11	121281870	121283957	ileum_down
chr11	121295461	121296948	ileum_down
chr12	8513469	8514472	ileum_down
chr12	8516469	8518924	ileum_down
chr12	8531561	8532871	ileum_down
chr12	8541563	8542810	ileum_down
chr12	8545444	8547308	ileum_down
chr12	8553923	8554831	ileum_down
chr12	8561957	8563561	ileum_down
chr12	8645178	8645866	ileum_down
chr12	8647362	8648598	ileum_down
chr12	16659763	16661819	ileum_down
chr12	16662833	16664713	ileum_down
chr12	16722595	16724950	ileum_down
chr12	16725012	16727015	ileum_down
chr12	16729152	16731654	ileum_down
chr12	16732755	16734228	ileum_down
chr12	16736855	16739264	ileum_down
chr12	16757364	16758672	ileum_down
chr12	16758874	16761609	ileum_down
chr12	16787127	16788813	ileum_down
chr12	16806744	16809058	ileum_down
chr12	16812247	16812770	ileum_down
chr12	17038199	17043237	ileum_down
chr12	17149584	17151467	ileum_down
chr12	17180808	17184318	ileum_down
chr12	17190530	17191725	ileum_down
chr12	17202178	17203608	ileum_down
chr12	17228579	17229549	ileum_down
chr12	17258782	17261403	ileum_down
chr12	17262964	17264403	ileum_down
chr12	17373660	17374273	ileum_down
chr12	17375770	17377380	ileum_down
chr12	17403848	17404398	ileum_down
chr12	17448031	17449003	ileum_down
chr12	17475295	17477430	ileum_down
chr12	17494910	17496374	ileum_down
chr12	17498157	17501179	ileum_down
chr12	17512406	17514703	ileum_down
chr12	17541333	17542743	ileum_down
chr12	17544576	17545680	ileum_down
chr12	17550906	17552587	ileum_down
chr12	17557824	17559463	ileum_down
chr12	17559568	17562177	ileum_down
chr12	17581894	17584748	ileum_down
chr12	17601455	17603187	ileum_down
chr12	17607664	17608983	ileum_down
chr12	17626541	17627931	ileum_down
chr12	17642721	17644112	ileum_down
chr12	17665157	17667144	ileum_down
chr12	17668099	17669311	ileum_down
chr12	17672144	17673809	ileum_down
chr12	36372360	36372812	ileum_down
chr12	36550894	36551720	ileum_down
chr12	36651850	36652477	ileum_down
chr12	36692444	36693815	ileum_down
chr12	36708147	36708804	ileum_down
chr12	40821930	40822800	ileum_down
chr12	40822974	40824486	ileum_down
chr12	40833360	40833962	ileum_down
chr12	40840295	40841056	ileum_down
chr12	40859224	40861500	ileum_down
chr12	40865812	40866956	ileum_down
chr12	40870629	40871211	ileum_down
chr12	40872923	40873656	ileum_down
chr12	40873837	40874607	ileum_down
chr12	40887204	40887802	ileum_down
chr12	40891218	40891618	ileum_down
chr12	41264960	41266029	ileum_down
chr12	41407053	41407500	ileum_down
chr12	41564154	41564721	ileum_down
chr12	41569063	41569975	ileum_down
chr12	41614224	41616123	ileum_down
chr12	41635359	41636350	ileum_down
chr12	41643839	41644614	ileum_down
chr12	41705343	41706302	ileum_down
chr12	41750201	41752219	ileum_down
chr12	41771264	41771770	ileum_down
chr12	41773582	41774456	ileum_down
chr12	41775299	41776454	ileum_down
chr12	41808113	41809085	ileum_down
chr12	41810590	41811485	ileum_down
chr12	41816259	41817019	ileum_down
chr12	41820576	41821668	ileum_down
chr12	41823959	41824422	ileum_down
chr12	41827646	41828387	ileum_down
chr12	41939674	41940287	ileum_down
chr12	42087221	42088216	ileum_down
chr12	54352455	54355211	ileum_down
chr12	55161751	55162183	ileum_down
chr12	55166221	55167094	ileum_down
chr12	55168351	55170213	ileum_down
chr12	55199659	55200284	ileum_down
chr12	55208172	55209296	ileum_down
chr12	55262504	55264619	ileum_down
chr12	55278976	55282493	ileum_down
chr12	55287874	55289995	ileum_down
chr12	55291730	55293720	ileum_down
chr12	55297996	55299904	ileum_down
chr12	55302892	55305422	ileum_down
chr12	55305872	55307460	ileum_down
chr12	55309474	55310703	ileum_down
chr12	55314281	55316292	ileum_down
chr12	55334599	55335565	ileum_down
chr12	55357462	55358437	ileum_down
chr12	55361342	55362003	ileum_down
chr12	55377346	55378746	ileum_down
chr12	55388645	55389604	ileum_down
chr12	55412968	55415038	ileum_down
chr12	55417649	55418662	ileum_down
chr12	55435328	55436188	ileum_down
chr12	55454855	55456025	ileum_down
chr12	55462565	55464062	ileum_down
chr12	55474787	55475811	ileum_down
chr12	55478703	55480261	ileum_down
chr12	55496932	55499065	ileum_down
chr12	55500546	55501962	ileum_down
chr12	55503516	55504179	ileum_down
chr12	55514734	55515779	ileum_down
chr12	55559726	55561862	ileum_down
chr12	55564296	55566525	ileum_down
chr12	55590469	55591818	ileum_down
chr12	55593082	55595125	ileum_down
chr12	55632812	55633726	ileum_down
chr12	55636678	55637644	ileum_down
chr12	55639079	55639768	ileum_down
chr12	55646632	55647976	ileum_down
chr12	55659060	55659520	ileum_down
chr12	55668887	55670613	ileum_down
chr12	55676022	55677581	ileum_down
chr12	55703992	55705237	ileum_down
chr12	55706148	55706905	ileum_down
chr12	55709690	55710633	ileum_down
chr12	55722614	55723725	ileum_down
chr12	55741156	55741939	ileum_down
chr12	55742231	55742814	ileum_down
chr12	55752801	55753956	ileum_down
chr12	55756575	55758085	ileum_down
chr12	55760381	55761427	ileum_down
chr12	55766417	55766893	ileum_down
chr12	70750044	70750963	ileum_down
chr12	70754842	70755481	ileum_down
chr12	70781319	70783610	ileum_down
chr12	70784379	70785079	ileum_down
chr12	70789292	70790417	ileum_down
chr12	70797717	70798369	ileum_down
chr12	70805893	70806573	ileum_down
chr12	70824489	70826712	ileum_down
chr12	70858477	70860043	ileum_down
chr12	70860333	70861386	ileum_down
chr12	70861639	70862580	ileum_down
chr12	70877398	70879269	ileum_down
chr12	70882985	70883699	ileum_down
chr12	70884034	70885027	ileum_down
chr12	70886156	70886910	ileum_down
chr12	70891037	70892542	ileum_down
chr12	70928965	70929906	ileum_down
chr12	71210881	71213676	ileum_down
chr12	71217762	71218954	ileum_down
chr12	71248962	71250510	ileum_down
chr12	71327516	71329583	ileum_down
chr12	71335127	71336647	ileum_down
chr12	71446720	71449425	ileum_down
chr12	73775025	73776177	ileum_down
chr12	73860984	73863382	ileum_down
chr12	73863480	73863999	ileum_down
chr12	73864124	73864603	ileum_down
chr12	73868744	73869544	ileum_down
chr12	73886023	73886979	ileum_down
chr12	73910747	73912067	ileum_down
chr12	73921708	73922886	ileum_down
chr12	73932606	73934080	ileum_down
chr12	73944184	73946058	ileum_down
chr12	73946865	73948155	ileum_down
chr12	77503914	77507486	ileum_down
chr12	79990731	79991814	ileum_down
chr12	79992068	79992575	ileum_down
chr12	80007005	80008374	ileum_down
chr12	80011182	80013562	ileum_down
chr12	80014952	80015949	ileum_down
chr12	80019117	80020867	ileum_down
chr12	80081151	80082480	ileum_down
chr12	80107078	80108748	ileum_down
chr12	80123614	80124427	ileum_down
chr12	80129601	80131583	ileum_down
chr12	80140436	80143603	ileum_down
chr12	80147248	80148974	ileum_down
chr12	80155323	80156754	ileum_down
chr12	80173240	80175990	ileum_down
chr12	80204625	80205607	ileum_down
chr12	80206111	80207157	ileum_down
chr12	80221343	80221991	ileum_down
chr12	80231225	80233401	ileum_down
chr12	80249021	80249717	ileum_down
chr12	80250146	80251709	ileum_down
chr12	80272422	80274192	ileum_down
chr12	80291497	80293600	ileum_down
chr12	80294301	80294955	ileum_down
chr12	80298055	80298634	ileum_down
chr12	82496665	82497163	ileum_down
chr12	82503043	82504374	ileum_down
chr12	82509839	82510707	ileum_down
chr12	82535668	82536147	ileum_down
chr12	82585503	82586448	ileum_down
chr12	82591377	82591929	ileum_down
chr12	82611711	82612402	ileum_down
chr12	82619128	82619665	ileum_down
chr12	82629126	82630513	ileum_down
chr12	82632827	82634248	ileum_down
chr12	85339468	85340928	ileum_down
chr12	85341187	85342011	ileum_down
chr12	85349794	85351626	ileum_down
chr12	85352213	85353344	ileum_down
chr12	85361142	85362000	ileum_down
chr12	85371531	85372639	ileum_down
chr12	85373647	85374655	ileum_down
chr12	85378515	85380316	ileum_down
chr12	85383141	85383750	ileum_down
chr12	85707864	85708396	ileum_down
chr12	85725274	85726666	ileum_down
chr12	85734513	85735639	ileum_down
chr12	85740163	85741161	ileum_down
chr12	85741318	85742301	ileum_down
chr12	85743395	85744401	ileum_down
chr12	85748784	85750476	ileum_down
chr12	85791148	85793389	ileum_down
chr12	85823632	85824987	ileum_down
chr12	85864466	85865986	ileum_down
chr12	85881898	85884222	ileum_down
chr12	85886589	85887494	ileum_down
chr12	86720785	86722271	ileum_down
chr12	86729128	86731789	ileum_down
chr12	86738036	86739854	ileum_down
chr12	86763116	86765385	ileum_down
chr12	86768404	86769883	ileum_down
chr12	86770138	86772619	ileum_down
chr12	86785128	86786675	ileum_down
chr12	86789986	86791256	ileum_down
chr12	86792346	86793974	ileum_down
chr12	86795750	86798395	ileum_down
chr12	86812797	86817618	ileum_down
chr12	86818628	86820573	ileum_down
chr12	86826237	86829243	ileum_down
chr12	86832750	86833736	ileum_down
chr12	86837354	86839257	ileum_down
chr12	86881500	86882810	ileum_down
chr12	86910251	86911602	ileum_down
chr12	86911686	86914629	ileum_down
chr12	86927499	86928318	ileum_down
chr12	88228823	88232352	ileum_down
chr12	88234655	88236622	ileum_down
chr12	88244540	88246565	ileum_down
chr12	88246643	88248143	ileum_down
chr12	88254847	88257523	ileum_down
chr12	88259310	88260752	ileum_down
chr12	88264272	88265729	ileum_down
chr12	88272331	88274803	ileum_down
chr12	88286968	88290117	ileum_down
chr12	88296534	88297739	ileum_down
chr12	88313757	88317228	ileum_down
chr12	88323677	88332414	ileum_down
chr12	99910832	99911460	ileum_down
chr12	99912648	99913595	ileum_down
chr12	99951653	99953646	ileum_down
chr12	99962936	99964143	ileum_down
chr12	99971459	99973908	ileum_down
chr12	99974981	99976766	ileum_down
chr12	100583421	100586556	ileum_down
chr12	100589385	100591681	ileum_down
chr12	100598863	100602556	ileum_down
chr12	100603568	100605197	ileum_down
chr12	100609579	100610536	ileum_down
chr12	100611580	100613196	ileum_down
chr12	100614869	100616051	ileum_down
chr12	100629176	100633815	ileum_down
chr12	100644377	100646112	ileum_down
chr12	100656503	100658441	ileum_down
chr12	100678099	100678726	ileum_down
chr12	100682609	100684211	ileum_down
chr12	100691314	100692294	ileum_down
chr12	100781638	100782462	ileum_down
chr12	100800199	100802412	ileum_down
chr12	100865466	100866830	ileum_down
chr12	100871824	100872665	ileum_down
chr12	100882793	100884168	ileum_down
chr12	101762906	101765128	ileum_down
chr12	101766832	101768578	ileum_down
chr12	101833377	101834015	ileum_down
chr12	101842684	101843375	ileum_down
chr12	101962131	101964368	ileum_down
chr12	101989388	101989946	ileum_down
chr12	102009577	102011247	ileum_down
chr12	102013053	102015063	ileum_down
chr12	102016392	102019045	ileum_down
chr12	102023295	102024052	ileum_down
chr12	102027945	102028782	ileum_down
chr12	102032470	102035060	ileum_down
chr12	102067088	102068175	ileum_down
chr12	102068853	102070166	ileum_down
chr12	102076678	102078610	ileum_down
chr12	102079150	102080032	ileum_down
chr12	102087356	102088193	ileum_down
chr12	102095699	102096589	ileum_down
chr12	102100329	102101969	ileum_down
chr12	102120332	102122247	ileum_down
chr12	102136250	102139088	ileum_down
chr12	104938199	104939643	ileum_down
chr12	104942261	104947494	ileum_down
chr12	104948064	104949124	ileum_down
chr12	104975836	104978854	ileum_down
chr12	109792088	109794032	ileum_down
chr12	109850952	109852395	ileum_down
chr12	109860018	109863307	ileum_down
chr12	109890872	109892662	ileum_down
chr12	109894005	109897046	ileum_down
chr12	109912396	109914681	ileum_down
chr12	109916541	109918316	ileum_down
chr12	109923126	109926266	ileum_down
chr12	109926676	109930182	ileum_down
chr12	109931433	109932197	ileum_down
chr12	109932311	109934143	ileum_down
chr12	109935868	109941188	ileum_down
chr12	109948978	109949779	ileum_down
chr12	109956630	109957476	ileum_down
chr12	109995523	109997276	ileum_down
chr12	110001478	110002358	ileum_down
chr12	110003577	110005463	ileum_down
chr12	110006475	110007335	ileum_down
chr12	112174278	112175386	ileum_down
chr12	112191245	112193187	ileum_down
chr12	112205099	112206204	ileum_down
chr12	112211115	112212782	ileum_down
chr12	112213862	112218663	ileum_down
chr12	112219730	112220495	ileum_down
chr12	112221127	112222037	ileum_down
chr12	112227301	112227918	ileum_down
chr12	112229345	112231863	ileum_down
chr12	112242142	112242881	ileum_down
chr12	112243272	112248555	ileum_down
chr12	112444910	112445697	ileum_down
chr12	112471860	112473555	ileum_down
chr12	112497496	112499659	ileum_down
chr12	112505373	112515255	ileum_down
chr12	112528105	112538524	ileum_down
chr12	112590771	112593168	ileum_down
chr12	112598813	112601102	ileum_down
chr12	112603780	112604600	ileum_down
chr12	112605002	112606110	ileum_down
chr12	112608318	112609032	ileum_down
chr12	112611452	112612259	ileum_down
chr12	112613832	112617425	ileum_down
chr12	114185027	114186795	ileum_down
chr12	114187583	114192129	ileum_down
chr12	114193916	114195508	ileum_down
chr12	114196290	114197127	ileum_down
chr12	114213735	114217000	ileum_down
chr13	4000688	4001460	ileum_down
chr13	4009901	4010392	ileum_down
chr13	4034142	4034973	ileum_down
chr13	4036201	4037768	ileum_down
chr13	4047166	4048497	ileum_down
chr13	4058460	4060187	ileum_down
chr13	4060712	4061923	ileum_down
chr13	4109601	4110306	ileum_down
chr13	4128358	4128857	ileum_down
chr13	4130755	4131482	ileum_down
chr13	4146527	4147002	ileum_down
chr13	4189996	4190943	ileum_down
chr13	4205228	4206254	ileum_down
chr13	4232368	4233707	ileum_down
chr13	4244212	4244981	ileum_down
chr13	4263594	4264971	ileum_down
chr13	4277877	4279089	ileum_down
chr13	4360149	4361204	ileum_down
chr13	4387749	4388818	ileum_down
chr13	4428199	4428755	ileum_down
chr13	4605987	4606910	ileum_down
chr13	4607681	4608892	ileum_down
chr13	4661584	4662498	ileum_down
chr13	4770446	4771318	ileum_down
chr13	4941660	4942069	ileum_down
chr13	5153945	5154661	ileum_down
chr13	5226502	5227705	ileum_down
chr13	5366079	5367362	ileum_down
chr13	5368615	5369579	ileum_down
chr13	5397261	5397803	ileum_down
chr13	5422116	5423076	ileum_down
chr13	5424366	5425797	ileum_down
chr13	5514776	5515212	ileum_down
chr13	5526468	5527158	ileum_down
chr13	5535139	5536058	ileum_down
chr13	5543884	5544773	ileum_down
chr13	5547951	5549003	ileum_down
chr13	5565420	5566351	ileum_down
chr13	5566813	5567412	ileum_down
chr13	19513751	19514638	ileum_down
chr13	19710493	19712004	ileum_down
chr13	19714429	19715759	ileum_down
chr13	23775452	23776366	ileum_down
chr13	23822244	23822849	ileum_down
chr13	23824201	23824727	ileum_down
chr13	23829861	23832079	ileum_down
chr13	24933456	24934010	ileum_down
chr13	24936632	24937536	ileum_down
chr13	24943528	24944999	ileum_down
chr13	24950925	24951472	ileum_down
chr13	24952646	24954755	ileum_down
chr13	24958203	24959300	ileum_down
chr13	24970914	24973535	ileum_down
chr13	24981357	24981906	ileum_down
chr13	24985646	24986573	ileum_down
chr13	25006342	25007370	ileum_down
chr13	25012153	25012808	ileum_down
chr13	25015584	25016344	ileum_down
chr13	25028337	25031141	ileum_down
chr13	31073445	31074043	ileum_down
chr13	31085634	31086121	ileum_down
chr13	31174217	31174907	ileum_down
chr13	31269157	31270670	ileum_down
chr13	31270831	31271956	ileum_down
chr13	31272133	31274000	ileum_down
chr13	31277636	31280445	ileum_down
chr13	31299394	31300039	ileum_down
chr13	31399859	31402415	ileum_down
chr13	31408772	31410090	ileum_down
chr13	31417853	31420033	ileum_down
chr13	31420312	31421942	ileum_down
chr13	31426459	31427319	ileum_down
chr13	31460422	31461842	ileum_down
chr13	31568794	31569790	ileum_down
chr13	31597641	31599203	ileum_down
chr13	31610058	31611272	ileum_down
chr13	31613766	31614553	ileum_down
chr13	31616422	31617577	ileum_down
chr13	31648190	31652409	ileum_down
chr13	31670137	31670931	ileum_down
chr13	31671487	31672401	ileum_down
chr13	31709674	31712080	ileum_down
chr13	34128972	34130366	ileum_down
chr13	34130722	34131237	ileum_down
chr13	34137166	34138913	ileum_down
chr13	34145419	34147670	ileum_down
chr13	34154221	34154881	ileum_down
chr13	34168414	34170442	ileum_down
chr13	34175746	34176406	ileum_down
chr13	34178677	34179495	ileum_down
chr13	34190896	34191723	ileum_down
chr13	34203882	34205133	ileum_down
chr13	34212113	34213050	ileum_down
chr13	34219757	34224447	ileum_down
chr13	34240488	34241797	ileum_down
chr13	34245311	34247334	ileum_down
chr13	34966871	34968987	ileum_down
chr13	35008325	35009139	ileum_down
chr13	36232075	36232949	ileum_down
chr13	36240853	36242075	ileum_down
chr13	36282357	36282842	ileum_down
chr13	36345032	36345842	ileum_down
chr13	36373914	36374358	ileum_down
chr13	36389452	36390690	ileum_down
chr13	36394238	36395314	ileum_down
chr13	36406147	36407168	ileum_down
chr13	36421451	36422221	ileum_down
chr13	36450551	36451526	ileum_down
chr13	36519149	36519784	ileum_down
chr13	36668403	36671762	ileum_down
chr13	36820941	36824883	ileum_down
[truncated: 6,456 more rows]

## Sheet: colon_up
TABLE S12: Genome coordinates of DHS within the regulatory domain of genes consistently up- or down-regulated in the ileum or colon of colonized vs. germ-free mice.
chrom	start	stop	category
chr1	9610648	9612059	colon_up
chr1	9617176	9618937	colon_up
chr1	9621538	9622157	colon_up
chr1	9650861	9651848	colon_up
chr1	9689545	9691378	colon_up
chr1	9693116	9693595	colon_up
chr1	9736773	9739133	colon_up
chr1	21334033	21334849	colon_up
chr1	52155541	52156120	colon_up
chr1	52157199	52157763	colon_up
chr1	52163884	52164584	colon_up
chr1	52169923	52171356	colon_up
chr1	52175467	52177791	colon_up
chr1	52198721	52199431	colon_up
chr1	52201348	52202422	colon_up
chr1	52203120	52204187	colon_up
chr1	52206631	52207330	colon_up
chr1	52226530	52228819	colon_up
chr1	52288408	52290758	colon_up
chr1	66884878	66885567	colon_up
chr1	66908210	66910291	colon_up
chr1	66930073	66931396	colon_up
chr1	66941256	66944988	colon_up
chr1	66947396	66948160	colon_up
chr1	66948864	66949922	colon_up
chr1	66986141	66988398	colon_up
chr1	81306539	81307102	colon_up
chr1	81312975	81314106	colon_up
chr1	81513030	81513724	colon_up
chr1	81947375	81949172	colon_up
chr1	82120041	82122388	colon_up
chr1	82146856	82148387	colon_up
chr1	82185235	82186824	colon_up
chr1	82231356	82233323	colon_up
chr1	82278028	82280724	colon_up
chr1	82286320	82288991	colon_up
chr1	83061061	83062078	colon_up
chr1	83065473	83066134	colon_up
chr1	83072322	83073353	colon_up
chr1	83101942	83102473	colon_up
chr1	83103708	83104562	colon_up
chr1	83107336	83108747	colon_up
chr1	83112942	83114773	colon_up
chr1	83132168	83132923	colon_up
chr1	83142878	83144731	colon_up
chr1	87468736	87472139	colon_up
chr1	87472363	87498067	colon_up
chr1	87500568	87509148	colon_up
chr1	87509218	87534001	colon_up
chr1	87534467	87535968	colon_up
chr1	87543025	87550065	colon_up
chr1	87595120	87596332	colon_up
chr1	87599689	87600781	colon_up
chr1	87631725	87634075	colon_up
chr1	87641074	87641724	colon_up
chr1	87668336	87668938	colon_up
chr1	87674912	87676914	colon_up
chr1	88072071	88073592	colon_up
chr1	88075168	88076309	colon_up
chr1	88077749	88079375	colon_up
chr1	88099625	88100696	colon_up
chr1	88101322	88102093	colon_up
chr1	88104895	88105895	colon_up
chr1	88110547	88111359	colon_up
chr1	88112656	88115427	colon_up
chr1	88121645	88122498	colon_up
chr1	88167694	88169222	colon_up
chr1	88173557	88174437	colon_up
chr1	88174665	88175229	colon_up
chr1	88178043	88179337	colon_up
chr1	88197013	88199221	colon_up
chr1	88199335	88201129	colon_up
chr1	88205372	88206527	colon_up
chr1	88209957	88210775	colon_up
chr1	88235845	88236591	colon_up
chr1	88255003	88257474	colon_up
chr1	121909348	121910216	colon_up
chr1	121929062	121930492	colon_up
chr1	121933559	121934385	colon_up
chr1	121966014	121967340	colon_up
chr1	121969313	121972600	colon_up
chr1	121979299	121981271	colon_up
chr1	121982212	121982741	colon_up
chr1	121986973	121988600	colon_up
chr1	121989974	121990535	colon_up
chr1	121996929	121998117	colon_up
chr1	122001899	122002664	colon_up
chr1	122011768	122013364	colon_up
chr1	130367256	130368017	colon_up
chr1	130368594	130369746	colon_up
chr1	130431424	130432833	colon_up
chr1	130487108	130490762	colon_up
chr1	130498567	130499582	colon_up
chr1	130575236	130576506	colon_up
chr1	130662157	130663911	colon_up
chr1	130685725	130687459	colon_up
chr1	130715952	130717337	colon_up
chr1	130720535	130721496	colon_up
chr1	130728175	130730784	colon_up
chr1	130771771	130772394	colon_up
chr1	132627587	132631541	colon_up
chr1	132633994	132634636	colon_up
chr1	132636257	132638387	colon_up
chr1	132657589	132658950	colon_up
chr1	132660277	132661380	colon_up
chr1	132666864	132668093	colon_up
chr1	132680513	132681095	colon_up
chr1	132683533	132684084	colon_up
chr1	132693168	132695743	colon_up
chr1	132699023	132701450	colon_up
chr1	132716781	132718010	colon_up
chr1	132718065	132719333	colon_up
chr1	133508618	133511242	colon_up
chr1	133552021	133552546	colon_up
chr1	133554352	133555172	colon_up
chr1	133557758	133559341	colon_up
chr1	133564463	133566128	colon_up
chr1	133712665	133713919	colon_up
chr1	133723551	133725645	colon_up
chr1	133742808	133743345	colon_up
chr1	133901984	133906298	colon_up
chr1	133942806	133943502	colon_up
chr1	133950435	133952876	colon_up
chr1	133955102	133955547	colon_up
chr1	133958253	133959665	colon_up
chr1	133963639	133964923	colon_up
chr1	133971682	133972856	colon_up
chr1	133981326	133982980	colon_up
chr1	133991916	133992703	colon_up
chr1	134017615	134018301	colon_up
chr1	134021828	134023216	colon_up
chr1	134029723	134030790	colon_up
chr1	134034476	134037169	colon_up
chr1	135807571	135808967	colon_up
chr1	135812244	135813480	colon_up
chr1	135814132	135815726	colon_up
chr1	135817563	135819231	colon_up
chr1	135846944	135847542	colon_up
chr1	135857911	135859026	colon_up
chr1	135887480	135888289	colon_up
chr1	135893036	135893694	colon_up
chr1	135902013	135903791	colon_up
chr1	137661295	137663927	colon_up
chr1	137667348	137668107	colon_up
chr1	137677498	137678346	colon_up
chr1	137679217	137679947	colon_up
chr1	137684328	137684812	colon_up
chr1	137685049	137685729	colon_up
chr1	137689598	137691832	colon_up
chr1	137692771	137693306	colon_up
chr1	137704105	137705226	colon_up
chr1	137706440	137707430	colon_up
chr1	137707744	137708322	colon_up
chr1	137708752	137710265	colon_up
chr1	139090580	139092877	colon_up
chr1	139110057	139110812	colon_up
chr1	139121900	139122595	colon_up
chr1	139194435	139195348	colon_up
chr1	139479586	139480148	colon_up
chr1	139523425	139525400	colon_up
chr1	139794639	139796268	colon_up
chr1	139796588	139797746	colon_up
chr1	139824429	139824966	colon_up
chr1	139887791	139889058	colon_up
chr1	139892502	139893188	colon_up
chr1	139940843	139941595	colon_up
chr1	153601595	153603899	colon_up
chr1	153606393	153607222	colon_up
chr1	153667222	153668299	colon_up
chr1	153669608	153671983	colon_up
chr1	153708369	153709687	colon_up
chr1	153710644	153711572	colon_up
chr1	153736890	153738030	colon_up
chr1	153835289	153836794	colon_up
chr1	153869832	153872971	colon_up
chr1	153886128	153888784	colon_up
chr1	153931384	153932776	colon_up
chr1	153935490	153938722	colon_up
chr1	154137540	154138706	colon_up
chr1	154216234	154216825	colon_up
chr1	158488342	158490156	colon_up
chr1	158535091	158536549	colon_up
chr1	158545381	158546526	colon_up
chr1	158547008	158547780	colon_up
chr1	158582151	158583442	colon_up
chr1	158584975	158586638	colon_up
chr1	158589921	158590919	colon_up
chr1	158596421	158598230	colon_up
chr1	158603410	158605235	colon_up
chr1	158606249	158606959	colon_up
chr1	158608171	158609380	colon_up
chr1	158647730	158650101	colon_up
chr1	163100607	163101391	colon_up
chr1	163110708	163111380	colon_up
chr1	163125013	163126716	colon_up
chr1	163144534	163145117	colon_up
chr1	163178937	163181788	colon_up
chr1	163184269	163184854	colon_up
chr1	163187019	163187473	colon_up
chr1	163189202	163189753	colon_up
chr1	163192450	163193295	colon_up
chr1	163194711	163195582	colon_up
chr1	163208827	163210070	colon_up
chr1	163212388	163213447	colon_up
chr1	163216745	163217525	colon_up
chr1	163231509	163232363	colon_up
chr1	173168564	173169075	colon_up
chr1	173431576	173434660	colon_up
chr1	173445058	173446358	colon_up
chr1	173465131	173466028	colon_up
chr1	173716115	173716858	colon_up
chr1	173745742	173746388	colon_up
chr1	173756277	173757078	colon_up
chr1	176142364	176142921	colon_up
chr1	176232886	176234466	colon_up
chr1	187186313	187188464	colon_up
chr1	187227781	187228302	colon_up
chr1	187236828	187237785	colon_up
chr1	187254950	187256868	colon_up
chr1	187272244	187274044	colon_up
chr1	187278035	187280088	colon_up
chr1	187291393	187292112	colon_up
chr1	187307061	187308542	colon_up
chr1	187311784	187312469	colon_up
chr1	187325810	187326973	colon_up
chr1	187332769	187333576	colon_up
chr1	187339384	187340761	colon_up
chr1	187341404	187341821	colon_up
chr1	187505619	187506845	colon_up
chr1	187508394	187508933	colon_up
chr1	187939958	187941610	colon_up
chr10	41169391	41171943	colon_up
chr10	41195678	41198300	colon_up
chr10	61517643	61518826	colon_up
chr10	61522134	61525012	colon_up
chr10	61532706	61534510	colon_up
chr10	61564406	61565812	colon_up
chr10	61567526	61568448	colon_up
chr10	61571518	61574630	colon_up
chr10	61962761	61963413	colon_up
chr10	62012162	62013535	colon_up
chr10	75251908	75253055	colon_up
chr10	75259764	75261719	colon_up
chr10	75343996	75346325	colon_up
chr10	75352153	75352654	colon_up
chr10	75353082	75353544	colon_up
chr10	75355502	75356787	colon_up
chr10	75360011	75360617	colon_up
chr10	75383357	75385151	colon_up
chr10	76991229	76991829	colon_up
chr10	77005785	77006680	colon_up
chr10	77028900	77030003	colon_up
chr10	77032587	77033662	colon_up
chr10	77037308	77037826	colon_up
chr10	78094746	78095525	colon_up
chr10	78097337	78098525	colon_up
chr10	78149307	78150537	colon_up
chr10	78156373	78157103	colon_up
chr10	78175739	78176548	colon_up
chr10	78179931	78181556	colon_up
chr10	78206342	78207117	colon_up
chr10	78209709	78210614	colon_up
chr10	79383555	79384685	colon_up
chr10	79387921	79388499	colon_up
chr10	79388684	79391319	colon_up
chr10	79396851	79397622	colon_up
chr10	79398934	79400515	colon_up
chr10	79407125	79409309	colon_up
chr10	79445687	79448151	colon_up
chr10	79451031	79452913	colon_up
chr10	83913350	83913963	colon_up
chr10	83950448	83951749	colon_up
chr10	83976415	83977350	colon_up
chr10	83978088	83979912	colon_up
chr10	83979969	83981236	colon_up
chr10	83995572	83997831	colon_up
chr10	84007722	84008481	colon_up
chr10	84025275	84026236	colon_up
chr10	89546784	89547573	colon_up
chr10	89658377	89659022	colon_up
chr10	89659224	89660309	colon_up
chr10	89725219	89726384	colon_up
chr10	89818994	89820891	colon_up
chr10	89836073	89836887	colon_up
chr10	89960585	89961489	colon_up
chr10	89970228	89970766	colon_up
chr10	90152744	90153312	colon_up
chr10	90190373	90192057	colon_up
chr10	90291464	90292844	colon_up
chr10	90302182	90303206	colon_up
chr10	90329236	90330332	colon_up
chr10	90343526	90344142	colon_up
chr10	90430924	90433218	colon_up
chr10	90495030	90495904	colon_up
chr10	90496401	90497215	colon_up
chr10	90501291	90502330	colon_up
chr10	90523021	90524140	colon_up
chr10	90524947	90525644	colon_up
chr10	90544576	90546481	colon_up
chr10	111414375	111415125	colon_up
chr10	111439480	111440019	colon_up
chr10	127191392	127194482	colon_up
chr10	127195764	127197061	colon_up
chr10	127212338	127213712	colon_up
chr10	127706141	127708241	colon_up
chr11	3358318	3359731	colon_up
chr11	3368898	3369413	colon_up
chr11	3371242	3372041	colon_up
chr11	3372462	3372966	colon_up
chr11	3380302	3381078	colon_up
chr11	3381787	3382900	colon_up
chr11	3387539	3389233	colon_up
chr11	3396590	3397475	colon_up
chr11	3403398	3405594	colon_up
chr11	3414261	3416633	colon_up
chr11	3434940	3436440	colon_up
chr11	3436809	3437321	colon_up
chr11	3438511	3440666	colon_up
chr11	3442877	3443537	colon_up
chr11	3502015	3503134	colon_up
chr11	16867791	16868200	colon_up
chr11	16878372	16879804	colon_up
chr11	16887461	16888572	colon_up
chr11	16889009	16890389	colon_up
chr11	16912912	16913371	colon_up
chr11	48650452	48652367	colon_up
chr11	48665095	48665592	colon_up
chr11	48668161	48670825	colon_up
chr11	48682746	48688542	colon_up
chr11	48712019	48713609	colon_up
chr11	51454077	51455357	colon_up
chr11	51460257	51461294	colon_up
chr11	51463227	51465367	colon_up
chr11	53548605	53549665	colon_up
chr11	53550339	53551583	colon_up
chr11	53570841	53571891	colon_up
chr11	53572265	53573652	colon_up
chr11	53575202	53578007	colon_up
chr11	53582586	53585050	colon_up
chr11	53607908	53609239	colon_up
chr11	53609721	53612272	colon_up
chr11	53652111	53655377	colon_up
chr11	53663085	53663874	colon_up
chr11	53670229	53670666	colon_up
chr11	53671739	53673517	colon_up
chr11	53687411	53689374	colon_up
chr11	55008095	55009290	colon_up
chr11	55017474	55018710	colon_up
chr11	55024985	55026067	colon_up
chr11	55026878	55028014	colon_up
chr11	55030800	55031699	colon_up
chr11	55053682	55054562	colon_up
chr11	58012126	58013678	colon_up
chr11	69713355	69716034	colon_up
chr11	70272159	70274749	colon_up
chr11	70288300	70289441	colon_up
chr11	70313555	70314101	colon_up
chr11	72114215	72116347	colon_up
chr11	78141512	78142924	colon_up
chr11	78156493	78157990	colon_up
chr11	78160643	78162946	colon_up
chr11	78171859	78172579	colon_up
chr11	78176270	78178373	colon_up
chr11	78180697	78182104	colon_up
chr11	78183805	78184672	colon_up
chr11	78190582	78192081	colon_up
chr11	78639644	78641434	colon_up
chr11	78644369	78646206	colon_up
chr11	78651124	78652091	colon_up
chr11	78669662	78670268	colon_up
chr11	78679770	78680469	colon_up
chr11	78680937	78681808	colon_up
chr11	78691772	78694137	colon_up
chr11	78696747	78697266	colon_up
chr11	78699955	78701421	colon_up
chr11	78709864	78710833	colon_up
chr11	78733770	78735421	colon_up
chr11	78735848	78739415	colon_up
chr11	78769697	78770522	colon_up
chr11	78780404	78781351	colon_up
chr11	78785633	78787251	colon_up
chr11	78791071	78791541	colon_up
chr11	78795376	78796081	colon_up
chr11	78796993	78799197	colon_up
chr11	78815523	78818101	colon_up
chr11	78827025	78827563	colon_up
chr11	78832480	78834994	colon_up
chr11	78842540	78845496	colon_up
chr11	78870399	78872918	colon_up
chr11	78875206	78876212	colon_up
chr11	78877689	78878229	colon_up
chr11	78899591	78901026	colon_up
chr11	78925049	78928539	colon_up
chr11	78945138	78946622	colon_up
chr11	78947719	78949670	colon_up
chr11	78958061	78960487	colon_up
chr11	82728277	82729036	colon_up
chr11	82743519	82748039	colon_up
chr11	82764313	82766719	colon_up
chr11	82773064	82773592	colon_up
chr11	82784296	82785395	colon_up
chr11	82803374	82805913	colon_up
chr11	82871320	82871808	colon_up
chr11	82877854	82879523	colon_up
chr11	82879794	82881169	colon_up
chr11	82891088	82892648	colon_up
chr11	82988139	82989689	colon_up
chr11	83347564	83349282	colon_up
chr11	83369640	83371348	colon_up
chr11	83385681	83386838	colon_up
chr11	83516752	83518339	colon_up
chr11	83522091	83522863	colon_up
chr11	83530483	83531275	colon_up
chr11	83542007	83542862	colon_up
chr11	83552577	83553242	colon_up
chr11	87615240	87616946	colon_up
chr11	87630006	87631453	colon_up
chr11	87633301	87635344	colon_up
chr11	87638219	87639797	colon_up
chr11	87648691	87649761	colon_up
chr11	87660381	87661849	colon_up
chr11	94424959	94427553	colon_up
chr11	94428480	94429246	colon_up
chr11	94435373	94437835	colon_up
chr11	94450597	94451463	colon_up
chr11	94457551	94458210	colon_up
chr11	94458521	94459348	colon_up
chr11	97483615	97484204	colon_up
chr11	97485906	97486530	colon_up
chr11	97487777	97492165	colon_up
chr11	97493029	97493810	colon_up
chr11	97506085	97506671	colon_up
chr11	98900946	98903452	colon_up
chr11	98926975	98927788	colon_up
chr11	98937770	98938712	colon_up
chr11	98948215	98951290	colon_up
chr11	100533913	100535327	colon_up
chr11	100552821	100554956	colon_up
chr11	100556153	100556721	colon_up
chr11	100562485	100566609	colon_up
chr11	101034340	101035988	colon_up
chr11	101037020	101037765	colon_up
chr11	101041639	101042997	colon_up
chr11	101309420	101310169	colon_up
chr11	101593669	101595333	colon_up
chr11	101624835	101625572	colon_up
chr11	101632281	101634538	colon_up
chr11	101644404	101649001	colon_up
chr11	101669967	101671535	colon_up
chr11	101672965	101675245	colon_up
chr11	101675763	101677691	colon_up
chr11	101700398	101701371	colon_up
chr11	101741653	101744643	colon_up
chr11	101752419	101753480	colon_up
chr11	102915820	102916618	colon_up
chr11	102954575	102957012	colon_up
chr11	102957845	102959166	colon_up
chr11	102962375	102965258	colon_up
chr11	103001296	103004634	colon_up
chr11	103019474	103021246	colon_up
chr11	103029877	103030620	colon_up
chr11	103031846	103033846	colon_up
chr11	103053410	103055742	colon_up
chr11	103059387	103061599	colon_up
chr11	105961777	105962624	colon_up
chr11	105995804	105997238	colon_up
chr11	106019236	106023136	colon_up
chr11	106028514	106029283	colon_up
chr11	115195446	115197056	colon_up
chr11	115202990	115203643	colon_up
chr11	115207080	115209333	colon_up
chr11	115215422	115216167	colon_up
chr11	115219467	115221718	colon_up
chr11	115227272	115229365	colon_up
chr11	115235040	115236344	colon_up
chr11	118221563	118222771	colon_up
chr11	118240529	118241412	colon_up
chr11	118261047	118263903	colon_up
chr11	118268378	118269918	colon_up
chr11	118270803	118273493	colon_up
chr11	118276568	118278141	colon_up
chr11	120503720	120505590	colon_up
chr11	120592781	120594028	colon_up
chr11	120594141	120595326	colon_up
chr11	120608964	120610335	colon_up
chr11	120623235	120625629	colon_up
chr11	120629223	120630081	colon_up
chr11	120637231	120637899	colon_up
chr11	120943908	120944837	colon_up
chr11	120945637	120948067	colon_up
chr11	120953956	120954878	colon_up
chr11	120961838	120963161	colon_up
chr11	120963617	120964766	colon_up
chr11	120971145	120971827	colon_up
chr12	4846433	4848826	colon_up
chr12	4849509	4851208	colon_up
chr12	27128853	27129330	colon_up
chr12	27136937	27138307	colon_up
chr12	27140645	27141871	colon_up
chr12	27153536	27155734	colon_up
chr12	27209678	27211287	colon_up
chr12	27215862	27217624	colon_up
chr12	27217664	27218797	colon_up
chr12	27231869	27232787	colon_up
chr12	27252055	27253195	colon_up
chr12	27282936	27283833	colon_up
chr12	27549161	27549828	colon_up
chr12	27651510	27652975	colon_up
chr12	27661109	27662149	colon_up
chr12	27744613	27745258	colon_up
chr12	27767473	27768460	colon_up
chr12	27768521	27771334	colon_up
chr12	27820782	27821639	colon_up
chr12	27825097	27827940	colon_up
chr12	27852034	27852862	colon_up
chr12	30356482	30358226	colon_up
chr12	30360589	30361354	colon_up
chr12	30397601	30398512	colon_up
chr12	30474204	30475186	colon_up
chr12	30479812	30480700	colon_up
chr12	30481831	30482760	colon_up
chr12	30483072	30484514	colon_up
chr12	30486096	30487368	colon_up
chr12	30494252	30495220	colon_up
chr12	30514236	30515324	colon_up
chr12	30522095	30523118	colon_up
chr12	30539839	30540324	colon_up
chr12	30567669	30568585	colon_up
chr12	30579088	30580245	colon_up
chr12	30622133	30624509	colon_up
chr12	30724026	30726088	colon_up
chr12	30734787	30735667	colon_up
chr12	30813223	30814269	colon_up
chr12	74655049	74655776	colon_up
chr12	74684376	74687370	colon_up
chr12	74711730	74712958	colon_up
chr12	74718441	74719931	colon_up
chr12	74733310	74734397	colon_up
chr12	74787485	74789123	colon_up
chr12	74799404	74802033	colon_up
chr12	74805935	74806917	colon_up
chr12	74809477	74810430	colon_up
chr12	74831734	74832947	colon_up
chr12	74879604	74881777	colon_up
chr12	74883442	74883984	colon_up
chr12	74891281	74892843	colon_up
chr12	74893654	74895866	colon_up
chr12	74930564	74931088	colon_up
chr12	74932293	74933381	colon_up
chr12	74936880	74937636	colon_up
chr12	74939134	74939941	colon_up
chr12	74942956	74943835	colon_up
chr12	74947558	74948159	colon_up
chr12	74954164	74954998	colon_up
chr12	74972607	74973900	colon_up
chr12	74974542	74975211	colon_up
chr12	74981230	74981935	colon_up
chr12	74984466	74985749	colon_up
chr12	74985800	74986831	colon_up
chr12	74999268	74999675	colon_up
chr12	75005930	75006506	colon_up
chr12	75008159	75009998	colon_up
chr12	75049720	75051440	colon_up
chr12	77866110	77867700	colon_up
chr12	77892920	77894064	colon_up
chr12	77894326	77897100	colon_up
chr12	77898006	77901270	colon_up
chr12	77904661	77905320	colon_up
chr12	77906404	77907385	colon_up
chr12	77919004	77919582	colon_up
chr12	77921181	77924262	colon_up
chr12	104672063	104673960	colon_up
chr12	104694257	104695827	colon_up
chr12	104721486	104723462	colon_up
chr12	104730954	104731649	colon_up
chr12	104732507	104733296	colon_up
chr12	112811627	112814552	colon_up
chr12	112886344	112886983	colon_up
chr12	112891338	112892295	colon_up
chr12	112906049	112911372	colon_up
chr12	112913230	112914415	colon_up
chr12	112914835	112917622	colon_up
chr12	114334840	114339593	colon_up
chr12	114350646	114351326	colon_up
chr12	114356628	114359151	colon_up
chr12	114370106	114371340	colon_up
chr12	114376703	114380070	colon_up
chr12	114382503	114383284	colon_up
chr12	114384146	114387235	colon_up
chr13	23662832	23663419	colon_up
chr13	23665836	23666490	colon_up
chr13	23667320	23667814	colon_up
chr13	23852849	23853700	colon_up
chr13	23854064	23854852	colon_up
chr13	23855009	23856298	colon_up
chr13	24379173	24379766	colon_up
chr13	24384747	24385406	colon_up
chr13	24389050	24389664	colon_up
chr13	24423742	24425580	colon_up
chr13	24429643	24430897	colon_up
chr13	24487404	24488282	colon_up
chr13	24508201	24509313	colon_up
chr13	24528434	24529942	colon_up
chr13	24538808	24539863	colon_up
chr13	24541944	24543308	colon_up
chr13	24549230	24549977	colon_up
chr13	24573539	24574320	colon_up
chr13	24610695	24612756	colon_up
chr13	24657045	24658673	colon_up
chr13	24674757	24675267	colon_up
chr13	24675954	24678020	colon_up
chr13	24694206	24696308	colon_up
chr13	24707880	24708595	colon_up
chr13	24729733	24732833	colon_up
chr13	24777517	24779757	colon_up
chr13	24801186	24803390	colon_up
chr13	24804402	24806050	colon_up
chr13	24807734	24808784	colon_up
chr13	24809382	24810682	colon_up
chr13	24811807	24812928	colon_up
chr13	24852275	24854775	colon_up
chr13	51780010	51781823	colon_up
chr13	51792608	51794069	colon_up
chr13	51820526	51822073	colon_up
chr13	51839403	51841201	colon_up
chr13	51842804	51844684	colon_up
chr13	51885693	51890585	colon_up
chr13	51926018	51926782	colon_up
chr13	51934727	51935482	colon_up
chr13	51940003	51945436	colon_up
chr13	51946263	51946906	colon_up
chr13	51948012	51949653	colon_up
chr13	51954958	51955712	colon_up
chr13	51967368	51968899	colon_up
chr13	51981148	51982794	colon_up
chr13	51993700	51994276	colon_up
chr13	51997793	51999511	colon_up
chr13	52001089	52002325	colon_up
chr13	52006488	52008283	colon_up
chr13	52012845	52014882	colon_up
chr13	52040849	52043156	colon_up
chr13	52048765	52049390	colon_up
chr13	52059134	52060709	colon_up
chr13	52064869	52065919	colon_up
chr13	52070743	52072451	colon_up
chr13	52074410	52075423	colon_up
chr13	52078179	52079286	colon_up
chr13	52102611	52104043	colon_up
chr13	52108462	52109905	colon_up
chr13	52113211	52113727	colon_up
chr13	52119302	52121577	colon_up
chr13	52130919	52133093	colon_up
chr13	52136813	52137958	colon_up
chr13	52155323	52158196	colon_up
chr13	52203445	52205395	colon_up
chr13	52205529	52207444	colon_up
chr13	52233186	52234859	colon_up
chr13	52246860	52247852	colon_up
chr13	52250016	52252456	colon_up
chr13	52252769	52253640	colon_up
chr13	52281782	52282974	colon_up
chr13	52284708	52287017	colon_up
chr13	52317404	52319663	colon_up
chr13	52345677	52346159	colon_up
chr13	52348182	52349000	colon_up
chr13	52370552	52372474	colon_up
chr13	52447705	52449062	colon_up
chr13	52546023	52547988	colon_up
chr13	52625082	52626857	colon_up
chr13	53069822	53070869	colon_up
chr13	53071457	53071956	colon_up
chr13	53073537	53074315	colon_up
chr13	53075461	53078677	colon_up
chr13	53096386	53097523	colon_up
chr13	53103156	53105390	colon_up
chr13	53114847	53115527	colon_up
chr13	53163047	53164988	colon_up
chr13	53190592	53192486	colon_up
chr13	53192761	53193560	colon_up
chr13	53197780	53198347	colon_up
chr13	53204799	53206423	colon_up
chr13	53213333	53216124	colon_up
chr13	53217361	53217938	colon_up
chr13	53220700	53221742	colon_up
chr13	53224901	53227488	colon_up
chr13	53275092	53276764	colon_up
chr13	53306818	53308600	colon_up
chr13	53326927	53329825	colon_up
chr13	53331328	53332573	colon_up
chr13	53342712	53344597	colon_up
chr13	53347260	53348149	colon_up
chr13	53376990	53378268	colon_up
chr13	53380050	53382074	colon_up
chr13	55470754	55472740	colon_up
chr13	55475039	55476483	colon_up
chr13	55479760	55481413	colon_up
chr13	58545095	58545662	colon_up
chr13	58553668	58555761	colon_up
chr13	58635533	58636590	colon_up
chr13	58643987	58645945	colon_up
chr13	58689139	58689861	colon_up
chr13	58690476	58691386	colon_up
chr13	58691983	58692623	colon_up
chr13	58694419	58694983	colon_up
chr13	58699938	58700572	colon_up
chr13	58710033	58712783	colon_up
chr13	58723842	58725205	colon_up
chr13	58738627	58739342	colon_up
chr13	58741691	58742165	colon_up
chr13	58769972	58771272	colon_up
chr13	58858640	58859858	colon_up
chr13	73520995	73521614	colon_up
chr13	73555067	73555681	colon_up
chr13	73562274	73563820	colon_up
chr13	73568362	73571683	colon_up
chr13	73583611	73584821	colon_up
chr13	73585398	73586308	colon_up
chr13	73587781	73588392	colon_up
chr13	73592617	73593889	colon_up
chr13	73604299	73606507	colon_up
chr13	73614622	73615254	colon_up
chr13	73642390	73643922	colon_up
chr13	73650007	73651736	colon_up
chr13	101555773	101556962	colon_up
chr13	101557233	101558002	colon_up
chr13	101601887	101603902	colon_up
chr13	113957723	113959835	colon_up
chr14	47500354	47506223	colon_up
chr14	47705534	47707653	colon_up
chr14	47711145	47712342	colon_up
chr14	47712719	47714443	colon_up
chr14	47723872	47725217	colon_up
chr14	47735459	47737238	colon_up
chr14	47797341	47798315	colon_up
chr14	47807437	47809904	colon_up
chr14	47828364	47829244	colon_up
chr14	47845595	47846646	colon_up
chr14	47869062	47869969	colon_up
chr14	47878440	47879129	colon_up
chr14	52390873	52391964	colon_up
chr14	52413128	52414657	colon_up
chr14	55045118	55046252	colon_up
chr14	55048981	55053489	colon_up
chr14	55067467	55068562	colon_up
chr14	55072210	55073157	colon_up
chr14	55073367	55074453	colon_up
chr14	56236416	56238050	colon_up
chr14	56248092	56248782	colon_up
chr14	56631042	56632847	colon_up
chr14	56658610	56659088	colon_up
chr14	56859231	56859801	colon_up
chr14	56922959	56923519	colon_up
chr14	56932776	56935891	colon_up
chr14	56941711	56942345	colon_up
chr14	56943655	56944239	colon_up
chr14	56954813	56955320	colon_up
chr14	56957656	56958266	colon_up
chr14	56970669	56971549	colon_up
chr14	57688364	57690253	colon_up
chr14	57693569	57694971	colon_up
chr14	57702441	57704474	colon_up
chr14	57707807	57709144	colon_up
chr14	57711747	57712361	colon_up
chr14	57721895	57724618	colon_up
chr14	57727999	57728501	colon_up
chr14	59949189	59949829	colon_up
chr14	59954045	59954669	colon_up
chr14	59983232	59986029	colon_up
chr14	60007716	60009478	colon_up
chr14	60042493	60042957	colon_up
chr14	66586729	66588118	colon_up
chr14	66600928	66601453	colon_up
chr14	66606109	66607396	colon_up
chr15	62733860	62735531	colon_up
chr15	63001937	63003093	colon_up
chr15	63040507	63041437	colon_up
chr15	63049843	63050668	colon_up
chr15	63171859	63173046	colon_up
chr15	63483635	63484759	colon_up
chr15	63553043	63553816	colon_up
chr15	63571858	63572731	colon_up
chr15	63602853	63603932	colon_up
chr15	63651543	63653300	colon_up
chr15	63676320	63677103	colon_up
chr15	63677710	63678710	colon_up
chr15	63683661	63684431	colon_up
chr15	63685260	63687116	colon_up
chr15	63709191	63710552	colon_up
chr15	63717313	63718040	colon_up
chr15	63718864	63720599	colon_up
chr15	63743528	63744179	colon_up
chr15	63744614	63745573	colon_up
chr15	63751017	63751756	colon_up
chr15	63752552	63756813	colon_up
chr15	63827991	63831271	colon_up
chr15	63862492	63865497	colon_up
chr15	63889766	63894077	colon_up
chr15	74720874	74724043	colon_up
chr15	74726686	74727387	colon_up
chr15	74749836	74750538	colon_up
chr15	74753634	74754603	colon_up
chr15	74760688	74762890	colon_up
chr15	74765203	74766097	colon_up
chr15	74784464	74787660	colon_up
chr15	74790925	74791787	colon_up
chr15	74797702	74799373	colon_up
chr15	74818638	74820033	colon_up
chr15	74823111	74823589	colon_up
chr15	75147556	75148174	colon_up
chr15	75210237	75210779	colon_up
chr15	75231563	75232942	colon_up
chr15	75275035	75275878	colon_up
chr15	75300161	75301038	colon_up
chr15	75378737	75380299	colon_up
chr15	75684213	75685108	colon_up
chr15	75691988	75693630	colon_up
chr15	75698492	75699610	colon_up
chr15	75714022	75715012	colon_up
chr15	75716877	75719995	colon_up
chr15	75722803	75725463	colon_up
chr15	78379480	78380151	colon_up
chr15	78409768	78412893	colon_up
chr15	78417419	78418378	colon_up
chr15	78424912	78425799	colon_up
chr15	78453529	78454580	colon_up
chr15	78454712	78456371	colon_up
chr15	78499352	78503669	colon_up
chr15	78510452	78515081	colon_up
chr15	78516364	78520475	colon_up
chr15	78706417	78709123	colon_up
chr15	78719332	78720530	colon_up
chr15	78729514	78732151	colon_up
chr15	78733267	78734319	colon_up
chr15	79682088	79682766	colon_up
chr15	79705317	79706476	colon_up
chr15	79709375	79710269	colon_up
chr15	79713343	79714360	colon_up
chr15	79721805	79723820	colon_up
chr15	79736918	79737764	colon_up
chr15	79757382	79758963	colon_up
chr15	79761906	79764535	colon_up
chr15	80429096	80430544	colon_up
chr15	80464508	80466274	colon_up
chr15	80469375	80470188	colon_up
chr15	80471763	80472930	colon_up
chr15	80475230	80476767	colon_up
chr15	80479136	80479938	colon_up
chr15	82191719	82192979	colon_up
chr15	82209779	82211620	colon_up
chr15	83348464	83349556	colon_up
chr15	83356480	83358488	colon_up
chr15	83360203	83361763	colon_up
chr15	83365414	83366947	colon_up
chr15	85726297	85727533	colon_up
chr15	85739020	85742052	colon_up
chr15	85744042	85744500	colon_up
chr15	85779756	85780656	colon_up
chr15	85799618	85801294	colon_up
chr15	85821117	85822906	colon_up
chr15	85826256	85827471	colon_up
chr15	85837862	85838733	colon_up
chr15	85840013	85840985	colon_up
chr15	85855008	85856186	colon_up
chr15	85857170	85858032	colon_up
chr15	85858274	85860759	colon_up
chr15	85862883	85865800	colon_up
chr15	85866183	85866980	colon_up
chr15	85869131	85869784	colon_up
chr15	98544254	98545270	colon_up
chr15	98553880	98555374	colon_up
chr15	98556903	98559106	colon_up
chr15	98576823	98578992	colon_up
chr15	98592145	98594302	colon_up
chr15	103177604	103178205	colon_up
chr15	103183250	103183840	colon_up
chr15	103194228	103198883	colon_up
chr15	103213104	103214579	colon_up
chr15	103218864	103219445	colon_up
chr15	103257036	103258030	colon_up
chr16	4695563	4696111	colon_up
chr16	4718488	4719695	colon_up
chr16	10192298	10194039	colon_up
chr16	10258948	10259422	colon_up
chr16	10272223	10273128	colon_up
chr16	10274474	10275593	colon_up
chr16	10276887	10277495	colon_up
chr16	10280134	10281059	colon_up
chr16	10299562	10300384	colon_up
chr16	10311825	10312937	colon_up
chr16	10313174	10314464	colon_up
chr16	10316889	10317739	colon_up
chr16	10319863	10321255	colon_up
chr16	10327430	10328557	colon_up
chr16	10330640	10331749	colon_up
chr16	10335825	10336835	colon_up
chr16	10347255	10348329	colon_up
chr16	10349196	10350773	colon_up
chr16	10357864	10358880	colon_up
chr16	10366277	10367300	colon_up
chr16	10373960	10375341	colon_up
chr16	10383972	10385367	colon_up
chr16	17131351	17133369	colon_up
chr16	19720912	19721752	colon_up
chr16	19759938	19761700	colon_up
chr16	19786243	19787407	colon_up
chr16	19840690	19841737	colon_up
chr16	19843806	19845253	colon_up
chr16	19847622	19849367	colon_up
chr16	19879736	19880414	colon_up
chr16	19883840	19885049	colon_up
chr16	20724453	20725022	colon_up
chr16	20726411	20726896	colon_up
chr16	20730099	20730986	colon_up
chr16	20732477	20735374	colon_up
chr16	23550390	23551794	colon_up
chr16	23608036	23610911	colon_up
chr16	23625378	23626755	colon_up
chr16	23833256	23834790	colon_up
chr16	32643648	32646622	colon_up
chr16	32658716	32661388	colon_up
chr16	32669574	32673605	colon_up
chr16	32673961	32675707	colon_up
chr16	32678643	32679966	colon_up
chr16	32688787	32690106	colon_up
chr16	32696614	32699665	colon_up
chr16	32707239	32709882	colon_up
chr16	32716408	32717798	colon_up
chr16	32725814	32726290	colon_up
chr16	32728236	32729971	colon_up
chr16	32735926	32736815	colon_up
chr16	32738098	32741256	colon_up
chr16	32741657	32744576	colon_up
chr16	32745333	32747135	colon_up
chr16	35813107	35813889	colon_up
chr16	35817247	35818061	colon_up
chr16	35839560	35840303	colon_up
chr16	35841981	35842882	colon_up
chr16	35869022	35870042	colon_up
chr16	35870200	35872821	colon_up
chr16	35874483	35875123	colon_up
chr16	35905172	35906517	colon_up
chr16	35906927	35908235	colon_up
chr16	35918155	35919734	colon_up
chr16	35937838	35940466	colon_up
chr16	35967386	35968949	colon_up
chr16	43277611	43278568	colon_up
chr16	43303215	43304221	colon_up
chr16	43309848	43311048	colon_up
chr16	43334469	43336202	colon_up
chr16	43385009	43386563	colon_up
chr16	43536993	43537868	colon_up
chr16	43539781	43540661	colon_up
chr16	43574033	43574602	colon_up
chr16	43576571	43578181	colon_up
chr16	43578990	43579781	colon_up
chr16	43586804	43587626	colon_up
chr16	43592871	43593365	colon_up
chr16	48811940	48812611	colon_up
chr16	48826277	48827192	colon_up
chr16	55469017	55469658	colon_up
chr16	55476638	55477790	colon_up
chr16	55519696	55520578	colon_up
chr16	55521037	55523198	colon_up
chr16	55527155	55528354	colon_up
chr16	55532703	55533514	colon_up
chr16	55537633	55538275	colon_up
chr16	55550865	55551540	colon_up
chr16	55575675	55576645	colon_up
chr16	55587122	55587953	colon_up
chr16	55606123	55607419	colon_up
chr16	55612867	55613681	colon_up
chr16	55617516	55618309	colon_up
chr16	55636196	55637534	colon_up
chr16	55671187	55672748	colon_up
chr16	55726006	55727215	colon_up
chr16	55733343	55734833	colon_up
chr16	55741046	55741896	colon_up
chr16	55753175	55753876	colon_up
chr16	55788793	55790068	colon_up
chr16	55790424	55791939	colon_up
chr16	55815488	55817170	colon_up
chr16	55818966	55820060	colon_up
chr16	55820328	55822940	colon_up
chr16	55823828	55825284	colon_up
chr16	55838202	55839758	colon_up
chr16	55852734	55853645	colon_up
chr16	55858412	55859038	colon_up
chr16	55863026	55864137	colon_up
chr16	58407949	58409776	colon_up
chr16	58454378	58455133	colon_up
chr16	58513985	58515096	colon_up
chr16	58519563	58520373	colon_up
chr16	58522730	58524940	colon_up
chr16	58538902	58540021	colon_up
chr16	58555483	58557055	colon_up
chr16	58612092	58613710	colon_up
chr16	73869485	73871338	colon_up
chr16	74038946	74040133	colon_up
chr16	74093082	74094486	colon_up
chr16	74133071	74133805	colon_up
chr16	74148321	74149314	colon_up
chr16	74233369	74233815	colon_up
chr16	74411252	74413819	colon_up
chr16	74857985	74858436	colon_up
chr16	74941536	74942541	colon_up
chr16	75165813	75166875	colon_up
chr16	75292924	75293766	colon_up
chr16	75325554	75325970	colon_up
chr16	75342960	75344149	colon_up
chr16	88540040	88541180	colon_up
chr16	88542660	88543200	colon_up
chr16	88561972	88564066	colon_up
chr16	88576335	88577093	colon_up
chr16	88583302	88583988	colon_up
chr16	88587513	88588264	colon_up
chr16	88599330	88601654	colon_up
chr16	88631287	88632229	colon_up
chr16	92475245	92476129	colon_up
chr16	92478547	92479562	colon_up
chr16	92497707	92502451	colon_up
chr16	92511905	92512674	colon_up
chr16	92519459	92521799	colon_up
chr16	92544342	92545042	colon_up
chr16	92564770	92567463	colon_up
chr16	92591970	92593327	colon_up
chr16	92597230	92598630	colon_up
chr16	92608430	92612491	colon_up
chr16	92615176	92616143	colon_up
chr16	92619374	92620351	colon_up
chr16	92631061	92633331	colon_up
chr16	92644043	92646848	colon_up
chr16	92652470	92655282	colon_up
chr16	92685651	92686597	colon_up
chr16	92686845	92687843	colon_up
chr16	92694577	92696304	colon_up
chr16	92696786	92701506	colon_up
chr16	92808984	92810236	colon_up
chr16	96423179	96423922	colon_up
chr16	96449614	96451209	colon_up
chr16	96451896	96452554	colon_up
chr16	96480934	96482158	colon_up
chr16	96486183	96487062	colon_up
chr16	96498232	96499166	colon_up
chr16	96502062	96503161	colon_up
chr16	96503772	96505554	colon_up
chr16	96506880	96507438	colon_up
chr16	96513533	96514241	colon_up
chr16	96516170	96517997	colon_up
chr16	96519707	96520677	colon_up
chr16	96522960	96523686	colon_up
chr16	96531915	96532934	colon_up
chr16	96546266	96549307	colon_up
chr16	96549727	96551957	colon_up
chr16	96566534	96567333	colon_up
chr16	97732072	97733728	colon_up
chr16	97735325	97736567	colon_up
chr16	97750857	97751286	colon_up
chr16	97755452	97758183	colon_up
chr17	23885595	23887705	colon_up
chr17	26335818	26341028	colon_up
chr17	28341136	28341780	colon_up
chr17	28344003	28345170	colon_up
chr17	28360253	28361595	colon_up
chr17	28362727	28363630	colon_up
chr17	34263701	34264867	colon_up
chr17	34272082	34273009	colon_up
chr17	34275821	34277338	colon_up
chr17	34289616	34290717	colon_up
chr17	34306192	34306649	colon_up
chr17	34307474	34308177	colon_up
chr17	34322875	34325530	colon_up
chr17	34334126	34335875	colon_up
chr17	34386832	34387227	colon_up
chr17	34394508	34395113	colon_up
chr17	34398201	34399133	colon_up
chr17	34399808	34402615	colon_up
chr17	34420962	34421469	colon_up
chr17	34422530	34423285	colon_up
chr17	34424517	34425152	colon_up
chr17	34428476	34428975	colon_up
chr17	34432688	34433862	colon_up
chr17	34437446	34438837	colon_up
chr17	34442517	34443213	colon_up
chr17	34446164	34447239	colon_up
chr17	34450293	34450894	colon_up
chr17	34667938	34668533	colon_up
chr17	34677230	34677941	colon_up
chr17	34685582	34686665	colon_up
chr17	34692190	34693030	colon_up
chr17	34696676	34697342	colon_up
chr17	34700678	34702515	colon_up
chr17	34713300	34714118	colon_up
chr17	35018179	35019303	colon_up
chr17	35213187	35215368	colon_up
chr17	35216578	35217640	colon_up
chr17	35220693	35221474	colon_up
chr17	35331237	35333717	colon_up
chr17	35335779	35336417	colon_up
chr17	35337968	35339665	colon_up
chr17	35478806	35480884	colon_up
chr17	35495470	35497039	colon_up
chr17	35515890	35517660	colon_up
chr17	35530480	35532716	colon_up
chr17	35554423	35555517	colon_up
chr17	35561151	35563481	colon_up
chr17	36130057	36131065	colon_up
chr17	36131141	36131866	colon_up
chr17	36133785	36134449	colon_up
chr17	36134573	36135769	colon_up
chr17	36137361	36139200	colon_up
chr17	36157266	36158108	colon_up
chr17	36160358	36161481	colon_up
chr17	36168288	36170000	colon_up
chr17	36257097	36259457	colon_up
chr17	37021986	37022898	colon_up
chr17	37028693	37029717	colon_up
chr17	37030877	37031585	colon_up
chr17	37406528	37408648	colon_up
chr17	43153068	43155829	colon_up
chr17	43165964	43167210	colon_up
chr17	43172229	43173734	colon_up
chr17	43188911	43190519	colon_up
chr17	43201532	43202091	colon_up
chr17	43211495	43213440	colon_up
chr17	43213878	43215335	colon_up
chr17	43233964	43234697	colon_up
chr17	43241206	43242076	colon_up
chr17	43242881	43243606	colon_up
chr17	43251028	43251553	colon_up
chr17	43253442	43254287	colon_up
chr17	43255836	43257122	colon_up
chr17	43266962	43268263	colon_up
chr17	43274782	43275972	colon_up
chr17	43292903	43293906	colon_up
chr17	43294737	43295773	colon_up
chr17	43311516	43312595	colon_up
chr17	43313782	43314929	colon_up
chr17	43361096	43362524	colon_up
chr17	43366121	43367393	colon_up
chr17	43401910	43403378	colon_up
chr17	43406692	43407811	colon_up
chr17	43409598	43410408	colon_up
chr17	43412891	43413693	colon_up
chr17	43462823	43465211	colon_up
chr17	43470840	43471816	colon_up
chr17	43472994	43474006	colon_up
chr17	43496975	43497871	colon_up
chr17	48557314	48557907	colon_up
chr17	48564532	48566241	colon_up
chr17	48572897	48573862	colon_up
chr17	56441879	56445855	colon_up
chr17	57358398	57359719	colon_up
chr17	57372078	57374708	colon_up
chr17	57403478	57405596	colon_up
chr17	57414041	57416927	colon_up
chr17	57418137	57419479	colon_up
chr17	57450972	57452159	colon_up
chr17	57473580	57474686	colon_up
chr17	57474922	57476105	colon_up
chr17	73456540	73459013	colon_up
chr17	73461767	73463222	colon_up
chr17	73491566	73492406	colon_up
chr17	73497867	73498458	colon_up
chr17	73523333	73524090	colon_up
chr17	73535721	73536788	colon_up
chr17	73542259	73543092	colon_up
chr17	73607044	73608636	colon_up
chr17	73612333	73612917	colon_up
chr17	73629065	73629633	colon_up
chr17	73646139	73646766	colon_up
chr17	73650474	73652251	colon_up
chr17	73652350	73653230	colon_up
chr17	73654548	73655628	colon_up
chr17	73692219	73694279	colon_up
chr17	73726789	73727922	colon_up
chr17	73734975	73735796	colon_up
chr17	73739331	73740679	colon_up
chr17	73748160	73749416	colon_up
chr17	73749814	73751518	colon_up
chr17	73763305	73764361	colon_up
chr17	73765117	73765711	colon_up
chr17	73799844	73800792	colon_up
chr17	73805369	73806231	colon_up
chr17	73806695	73807695	colon_up
chr17	73807929	73808974	colon_up
chr17	73837114	73837718	colon_up
chr17	73921429	73923029	colon_up
chr17	73988372	73989888	colon_up
chr17	74058265	74061287	colon_up
chr18	15293040	15293637	colon_up
chr18	15298633	15299473	colon_up
chr18	15307938	15310048	colon_up
chr18	15439345	15441224	colon_up
chr18	15498451	15499227	colon_up
chr18	15510105	15510671	colon_up
chr18	15558722	15560599	colon_up
chr18	15560871	15562423	colon_up
chr18	15563123	15564109	colon_up
chr18	15564949	15566451	colon_up
chr18	15585313	15586756	colon_up
chr18	15608559	15609641	colon_up
chr18	15618586	15620969	colon_up
chr18	15624531	15625266	colon_up
chr18	15691448	15693207	colon_up
chr18	15697712	15698598	colon_up
chr18	15710380	15711689	colon_up
chr18	35879170	35879904	colon_up
chr18	35880936	35882408	colon_up
chr18	35889098	35890601	colon_up
chr18	35899187	35900990	colon_up
chr18	35906230	35907248	colon_up
chr18	35908220	35908758	colon_up
chr18	35911005	35912278	colon_up
chr18	36866256	36867207	colon_up
chr18	36867815	36868977	colon_up
chr18	36884303	36886723	colon_up
chr18	60515886	60516266	colon_up
chr18	60933691	60935889	colon_up
chr18	60946593	60947313	colon_up
chr18	60962999	60963777	colon_up
chr18	60965053	60966544	colon_up
chr18	60990029	60991657	colon_up
chr18	61003420	61004787	colon_up
chr18	67959259	67960832	colon_up
chr18	68035600	68037131	colon_up
chr18	68065157	68066123	colon_up
chr18	68091136	68094713	colon_up
chr18	68097630	68099727	colon_up
chr18	68126118	68129192	colon_up
chr18	68168200	68169034	colon_up
chr18	68194239	68195609	colon_up
chr18	68206653	68208067	colon_up
chr18	68216923	68219472	colon_up
chr18	68244134	68245287	colon_up
chr18	68245632	68246106	colon_up
chr18	68315868	68317638	colon_up
chr18	68319148	68320825	colon_up
chr18	68349119	68349933	colon_up
chr18	68354082	68355804	colon_up
chr18	68403509	68404819	colon_up
chr18	77303164	77305771	colon_up
chr18	77358028	77359051	colon_up
chr18	77360015	77360731	colon_up
chr18	77365697	77366152	colon_up
chr18	77414090	77415198	colon_up
chr18	77423433	77425815	colon_up
chr18	77442412	77443664	colon_up
chr18	77446211	77447859	colon_up
chr18	77489797	77490394	colon_up
chr18	77496264	77498092	colon_up
chr18	77515112	77517176	colon_up
chr19	3855077	3856096	colon_up
chr19	3882885	3884070	colon_up
chr19	3904399	3906095	colon_up
chr19	3906183	3907701	colon_up
chr19	3912036	3914047	colon_up
chr19	3928909	3930291	colon_up
chr19	3934933	3936767	colon_up
chr19	3942199	3943825	colon_up
chr19	3946142	3947240	colon_up
chr19	3958404	3959393	colon_up
chr19	4046598	4047490	colon_up
chr19	4055646	4057351	colon_up
chr19	4058834	4059860	colon_up
chr19	4181766	4182532	colon_up
chr19	4184006	4184477	colon_up
chr19	4190778	4193025	colon_up
chr19	7094660	7095514	colon_up
chr19	7113159	7115621	colon_up
chr19	7631521	7633634	colon_up
chr19	7654575	7656070	colon_up
chr19	7680267	7683067	colon_up
chr19	7686124	7687528	colon_up
chr19	10092147	10093846	colon_up
chr19	10108025	10108602	colon_up
chr19	10109088	10109899	colon_up
chr19	10113961	10114531	colon_up
chr19	10115396	10117184	colon_up
chr19	10123982	10126029	colon_up
chr19	10131541	10133203	colon_up
chr19	10134246	10135892	colon_up
chr19	10139764	10141902	colon_up
chr19	10152588	10155211	colon_up
chr19	10167359	10167988	colon_up
chr19	10168912	10170788	colon_up
chr19	10174266	10177547	colon_up
chr19	10209056	10209708	colon_up
chr19	10256661	10258986	colon_up
chr19	10273128	10273762	colon_up
chr19	11529233	11529769	colon_up
chr19	12868966	12871996	colon_up
chr19	12878692	12879467	colon_up
chr19	16206195	16208686	colon_up
chr19	16212060	16212449	colon_up
chr19	16242614	16243814	colon_up
chr19	16261400	16263137	colon_up
chr19	16289175	16290056	colon_up
chr19	16292470	16292995	colon_up
chr19	16331665	16332332	colon_up
chr19	16332615	16336657	colon_up
chr19	16341374	16342302	colon_up
chr19	16359040	16360001	colon_up
chr19	16400006	16400940	colon_up
chr19	16401538	16402420	colon_up
chr19	16404600	16405662	colon_up
chr19	16414442	16415199	colon_up
chr19	16432543	16433899	colon_up
chr19	16447069	16449395	colon_up
chr19	16450217	16452167	colon_up
chr19	16509105	16513270	colon_up
chr19	16513661	16515058	colon_up
chr19	16537622	16539005	colon_up
chr19	16542558	16544076	colon_up
chr19	16558152	16560687	colon_up
chr19	16565116	16566690	colon_up
chr19	16585323	16586037	colon_up
chr19	16603532	16604218	colon_up
chr19	16632449	16632913	colon_up
chr19	16636872	16638136	colon_up
chr19	16659273	16660365	colon_up
chr19	16671788	16674662	colon_up
chr19	16681913	16683217	colon_up
chr19	16748380	16749255	colon_up
chr19	16854345	16856387	colon_up
chr19	28795972	28797995	colon_up
chr19	28800208	28801412	colon_up
chr19	28817720	28818339	colon_up
chr19	28833157	28833998	colon_up
chr19	28839161	28840169	colon_up
chr19	28851168	28851990	colon_up
chr19	28901922	28903003	colon_up
chr19	28903845	28904478	colon_up
chr19	28908822	28911838	colon_up
chr19	28957398	28958234	colon_up
chr19	28990002	28991313	colon_up
chr19	29434217	29437051	colon_up
chr19	29441187	29442620	colon_up
chr19	29445996	29447396	colon_up
chr19	34622450	34622945	colon_up
chr19	34624795	34625944	colon_up
chr19	34631114	34631614	colon_up
chr19	34647588	34649209	colon_up
chr19	34657102	34658406	colon_up
chr19	34671211	34674215	colon_up
chr19	34681522	34682813	colon_up
chr19	34701966	34702477	colon_up
chr19	34703975	34704548	colon_up
chr19	34711286	34711900	colon_up
chr19	34714699	34716070	colon_up
chr19	34736367	34737584	colon_up
chr19	34740546	34741103	colon_up
chr19	34747900	34748515	colon_up
chr19	34759294	34759836	colon_up
chr19	34765800	34766323	colon_up
chr19	34770753	34771324	colon_up
chr19	34772607	34773363	colon_up
chr19	34786130	34787508	colon_up
chr19	34820257	34822464	colon_up
chr19	34825400	34826750	colon_up
chr19	34847182	34847971	colon_up
chr19	34893421	34894638	colon_up
chr19	34900620	34901492	colon_up
chr19	34908523	34909079	colon_up
chr19	34913498	34914312	colon_up
chr19	34920411	34921425	colon_up
chr19	34926855	34927374	colon_up
chr19	34951851	34954885	colon_up
chr19	41349557	41350775	colon_up
chr19	41357867	41359622	colon_up
chr19	41360972	41361934	colon_up
chr19	41363231	41364507	colon_up
chr19	41385084	41386165	colon_up
chr19	41388117	41388823	colon_up
chr19	41391967	41392704	colon_up
chr19	41404450	41405688	colon_up
chr19	41419203	41422813	colon_up
chr19	41455708	41458078	colon_up
chr19	41458870	41460492	colon_up
chr19	41516947	41517621	colon_up
chr19	41548505	41549877	colon_up
chr19	41555431	41558660	colon_up
chr19	41569537	41570909	colon_up
chr19	45088160	45093321	colon_up
chr19	45102162	45103078	colon_up
chr19	45105166	45105718	colon_up
chr19	45105954	45106799	colon_up
chr19	45120644	45123674	colon_up
chr19	58821622	58822606	colon_up
chr19	58822834	58823731	colon_up
chr19	58825823	58826407	colon_up
chr19	58833023	58834978	colon_up
chr19	58836836	58838079	colon_up
chr2	22476714	22480016	colon_up
chr2	22490229	22490785	colon_up
chr2	22503918	22504573	colon_up
chr2	22532110	22533143	colon_up
chr2	22536690	22538487	colon_up
chr2	22576708	22578027	colon_up
chr2	22594714	22595546	colon_up
chr2	22596104	22597212	colon_up
chr2	22599028	22600893	colon_up
chr2	22608832	22610449	colon_up
chr2	22613839	22614586	colon_up
chr2	22628927	22631142	colon_up
chr2	22690957	22691461	colon_up
chr2	22720116	22720697	colon_up
chr2	22728389	22729638	colon_up
chr2	22729941	22730907	colon_up
chr2	22731568	22733432	colon_up
chr2	30700450	30701947	colon_up
chr2	30719738	30721256	colon_up
chr2	30746423	30747720	colon_up
chr2	30752301	30753911	colon_up
chr2	30754608	30755674	colon_up
chr2	30756160	30759043	colon_up
chr2	30768509	30769655	colon_up
chr2	30775317	30776290	colon_up
chr2	30783654	30785784	colon_up
chr2	30797542	30798765	colon_up
chr2	32664268	32665373	colon_up
chr2	32672034	32673530	colon_up
chr2	32676745	32677563	colon_up
chr2	32689955	32690796	colon_up
chr2	32701157	32703239	colon_up
chr2	32704273	32704796	colon_up
chr2	32707608	32708302	colon_up
chr2	32709683	32710140	colon_up
chr2	32713076	32713567	colon_up
chr2	32722797	32723420	colon_up
chr2	32725170	32726554	colon_up
chr2	35144395	35145002	colon_up
chr2	35152941	35154155	colon_up
chr2	35154784	35155551	colon_up
chr2	35159847	35160922	colon_up
chr2	35165188	35166340	colon_up
chr2	35177278	35178840	colon_up
chr2	35188189	35188766	colon_up
chr2	35191536	35193450	colon_up
chr2	35193718	35194516	colon_up
chr2	35198010	35198719	colon_up
chr2	35204567	35205391	colon_up
chr2	58007455	58010158	colon_up
chr2	58044183	58045100	colon_up
chr2	58047144	58049026	colon_up
chr2	58051545	58052618	colon_up
chr2	58131323	58132821	colon_up
chr2	58134563	58135471	colon_up
chr2	58156654	58157430	colon_up
chr2	58208599	58211211	colon_up
chr2	74329239	74330070	colon_up
chr2	74415918	74417853	colon_up
chr2	74433866	74435529	colon_up
chr2	74458313	74459121	colon_up
chr2	74492816	74494977	colon_up
chr2	74495334	74498071	colon_up
chr2	74501415	74502038	colon_up
chr2	74505042	74507202	colon_up
chr2	74510435	74511558	colon_up
chr2	84637959	84640058	colon_up
chr2	92909002	92910146	colon_up
chr2	92911516	92912435	colon_up
chr2	92915641	92917070	colon_up
chr2	92929430	92930402	colon_up
chr2	92951789	92953420	colon_up
chr2	92953860	92955032	colon_up
chr2	92955194	92956021	colon_up
chr2	92971276	92973286	colon_up
chr2	92992786	92993682	colon_up
chr2	92993956	92996947	colon_up
chr2	93001248	93001794	colon_up
chr2	93003522	93004685	colon_up
chr2	93016517	93017702	colon_up
chr2	93019525	93020877	colon_up
chr2	93026039	93027163	colon_up
chr2	93027192	93029621	colon_up
chr2	93030608	93033258	colon_up
chr2	93035543	93036387	colon_up
chr2	93038491	93040285	colon_up
chr2	93043455	93044758	colon_up
chr2	93054213	93054981	colon_up
chr2	93057077	93058426	colon_up
chr2	93066556	93068538	colon_up
chr2	93096116	93100096	colon_up
chr2	93118050	93119279	colon_up
chr2	93153557	93154552	colon_up
chr2	93173104	93175319	colon_up
chr2	118725564	118729561	colon_up
chr2	118751538	118753495	colon_up
chr2	118798284	118799013	colon_up
chr2	118800694	118803288	colon_up
chr2	118821943	118824856	colon_up
chr2	118840480	118841995	colon_up
chr2	118853763	118855534	colon_up
chr2	119149652	119153245	colon_up
chr2	119154652	119155510	colon_up
chr2	119163121	119164284	colon_up
chr2	119176217	119177670	colon_up
chr2	119192620	119193804	colon_up
chr2	119196494	119197263	colon_up
chr2	119224050	119225596	colon_up
chr2	119233930	119234848	colon_up
chr2	119239383	119240146	colon_up
chr2	119262574	119263346	colon_up
chr2	119302270	119304415	colon_up
chr2	120121436	120122550	colon_up
chr2	120129885	120130870	colon_up
chr2	120137917	120139014	colon_up
chr2	120139421	120141421	colon_up
chr2	122059585	122061710	colon_up
chr2	122066515	122068233	colon_up
chr2	122068808	122070711	colon_up
chr2	122085880	122087963	colon_up
chr2	122091567	122093431	colon_up
chr2	122110583	122112578	colon_up
chr2	122121653	122129232	colon_up
chr2	122383797	122384513	colon_up
chr2	122395091	122395798	colon_up
chr2	122436351	122437735	colon_up
chr2	128792421	128794473	colon_up
chr2	128866252	128866723	colon_up
chr2	128878072	128878761	colon_up
chr2	155659856	155661260	colon_up
chr2	155663626	155664306	colon_up
chr2	155673722	155674504	colon_up
chr2	155688165	155689675	colon_up
chr2	155695248	155697221	colon_up
chr2	155701183	155701982	colon_up
chr2	155707763	155708882	colon_up
chr2	155727744	155729877	colon_up
chr2	155743076	155744671	colon_up
chr2	156919513	156921508	colon_up
chr2	156959972	156961768	colon_up
chr2	156974078	156974669	colon_up
chr2	156993109	156993898	colon_up
chr2	157011062	157012023	colon_up
chr2	157026710	157027767	colon_up
chr2	157028997	157031266	colon_up
chr2	164338655	164341474	colon_up
chr2	164343198	164343759	colon_up
chr2	164346233	164346855	colon_up
chr2	164347089	164348266	colon_up
chr2	164348743	164349412	colon_up
chr2	164356609	164357655	colon_up
chr2	164368831	164371186	colon_up
chr2	164384139	164385247	colon_up
chr2	164387304	164390291	colon_up
chr2	165817704	165819363	colon_up
chr2	165822004	165822630	colon_up
chr2	165826979	165827648	colon_up
chr2	165832464	165833067	colon_up
chr2	165846265	165847020	colon_up
chr2	165854713	165855134	colon_up
chr2	165855503	165857457	colon_up
chr2	165861015	165861729	colon_up
chr2	165870238	165872149	colon_up
chr2	165904622	165910042	colon_up
chr2	165910194	165911465	colon_up
chr2	165933715	165934857	colon_up
chr2	165946877	165949013	colon_up
chr2	165950413	165952530	colon_up
chr2	165953543	165954123	colon_up
chr2	165967475	165969230	colon_up
chr2	165973186	165975125	colon_up
chr2	165978199	165981494	colon_up
chr2	165982447	165984100	colon_up
chr2	165994718	165996328	colon_up
chr2	166005291	166007806	colon_up
chr2	166011458	166012697	colon_up
chr2	166040635	166043499	colon_up
chr2	166055235	166057028	colon_up
chr2	166378739	166379887	colon_up
chr2	166389264	166390815	colon_up
chr2	166396846	166401613	colon_up
chr2	166417119	166419001	colon_up
chr2	166461418	166465643	colon_up
chr2	166500141	166503098	colon_up
chr2	166537785	166540774	colon_up
chr2	172984718	172985940	colon_up
chr2	172987277	172988132	colon_up
chr2	172988787	172989664	colon_up
chr2	172995505	172997851	colon_up
chr2	173009435	173011202	colon_up
chr2	173011705	173013557	colon_up
chr2	173043836	173045672	colon_up
chr2	173054873	173056781	colon_up
chr2	173056884	173059311	colon_up
chr2	173080883	173083654	colon_up
chr2	173086886	173087908	colon_up
chr2	173088909	173090860	colon_up
chr2	173091415	173092813	colon_up
chr2	173099899	173103031	colon_up
chr2	174240235	174242331	colon_up
chr2	174262446	174265041	colon_up
chr2	174267392	174268959	colon_up
chr2	179904394	179908386	colon_up
chr2	179942359	179943240	colon_up
chr2	179956843	179957484	colon_up
chr2	179959124	179961192	colon_up
chr2	179961706	179964185	colon_up
chr2	179969170	179970313	colon_up
chr2	179970503	179972717	colon_up
chr2	179985737	179986500	colon_up
chr3	27081375	27083589	colon_up
chr3	27087196	27087865	colon_up
chr3	27088261	27089331	colon_up
chr3	27103484	27104735	colon_up
chr3	27113031	27114371	colon_up
chr3	27126490	27128255	colon_up
chr3	27131967	27133892	colon_up
chr3	27135947	27136792	colon_up
chr3	27168701	27169843	colon_up
chr3	27171696	27172712	colon_up
chr3	27181711	27183112	colon_up
chr3	27205642	27206613	colon_up
chr3	27213130	27214147	colon_up
chr3	27214837	27216849	colon_up
chr3	27218539	27220332	colon_up
chr3	27237345	27237909	colon_up
chr3	27244279	27245075	colon_up
chr3	48575577	48576139	colon_up
chr3	48649357	48650693	colon_up
chr3	48788628	48789989	colon_up
chr3	48897669	48898265	colon_up
chr3	49467813	49469066	colon_up
chr3	49559483	49561994	colon_up
chr3	49635993	49636640	colon_up
chr3	49643973	49645856	colon_up
chr3	49829750	49830633	colon_up
chr3	49848118	49849405	colon_up
chr3	49880800	49881476	colon_up
chr3	49924890	49925332	colon_up
chr3	50065796	50067024	colon_up
chr3	50081848	50083017	colon_up
chr3	50103894	50105518	colon_up
chr3	50106476	50107410	colon_up
chr3	50107905	50108585	colon_up
chr3	50179429	50180864	colon_up
chr3	50185382	50187413	colon_up
chr3	50224615	50226367	colon_up
chr3	50234980	50235515	colon_up
chr3	50245997	50248649	colon_up
chr3	87559594	87563030	colon_up
chr3	87565142	87566306	colon_up
chr3	87566510	87569539	colon_up
chr3	87572271	87573351	colon_up
chr3	87582059	87582706	colon_up
chr3	89030860	89033501	colon_up
chr3	89035243	89039158	colon_up
chr3	89041484	89043114	colon_up
chr3	90329284	90331277	colon_up
chr3	97984532	97985509	colon_up
chr3	97996973	97997690	colon_up
chr3	98001618	98002909	colon_up
chr3	98027732	98028922	colon_up
chr3	98030657	98031995	colon_up
chr3	98053228	98054296	colon_up
chr3	98057877	98059574	colon_up
chr3	98063068	98064439	colon_up
chr3	98070819	98071922	colon_up
chr3	98078190	98079097	colon_up
chr3	99993018	99994040	colon_up
chr3	100137207	100137817	colon_up
chr3	100162672	100163949	colon_up
chr3	100166608	100168886	colon_up
chr3	100169339	100172045	colon_up
chr3	100198205	100200306	colon_up
chr3	100225818	100226929	colon_up
chr3	100231051	100231994	colon_up
chr3	100242362	100244417	colon_up
chr3	100244668	100245315	colon_up
chr3	100264910	100267838	colon_up
chr3	100289188	100289974	colon_up
chr3	100290892	100294874	colon_up
chr3	100338436	100341457	colon_up
chr3	100406836	100407563	colon_up
chr3	100416587	100417325	colon_up
chr3	100481452	100482435	colon_up
chr3	100485384	100486156	colon_up
chr3	100487648	100490912	colon_up
chr3	100496212	100496788	colon_up
chr3	100571876	100572664	colon_up
chr3	100574983	100576063	colon_up
chr3	100601989	100604150	colon_up
chr3	100614111	100615025	colon_up
chr3	100628847	100630076	colon_up
chr3	100634105	100635200	colon_up
chr3	100646931	100648702	colon_up
chr3	100659771	100662009	colon_up
chr3	100708213	100709329	colon_up
chr3	100710551	100711242	colon_up
chr3	100720607	100721251	colon_up
chr3	127491052	127494960	colon_up
chr3	127499313	127500731	colon_up
chr3	127507828	127509328	colon_up
chr3	127521459	127522601	colon_up
chr3	127532821	127533602	colon_up
chr3	142217482	142218846	colon_up
chr3	142222498	142224140	colon_up
chr3	142265160	142265664	colon_up
chr3	142282977	142284636	colon_up
chr3	142302854	142303656	colon_up
chr3	142308777	142309561	colon_up
chr3	144399799	144400217	colon_up
chr3	144415765	144416741	colon_up
chr3	144423376	144424918	colon_up
chr3	144464794	144465318	colon_up
chr3	144474720	144475282	colon_up
chr3	144488020	144489388	colon_up
chr3	144508644	144509115	colon_up
chr3	144511901	144513103	colon_up
chr3	144549735	144550464	colon_up
chr3	144552587	144554405	colon_up
chr3	151379194	151379660	colon_up
chr3	151412244	151413477	colon_up
chr4	3523134	3523559	colon_up
chr4	3534288	3534932	colon_up
chr4	3604369	3606621	colon_up
chr4	3737321	3737827	colon_up
chr4	25381852	25382480	colon_up
chr4	25410003	25411295	colon_up
chr4	25557979	25559350	colon_up
chr4	25574843	25575789	colon_up
chr4	25725119	25727746	colon_up
chr4	25810019	25811203	colon_up
chr4	26175001	26176259	colon_up
chr4	26272758	26274665	colon_up
chr4	40088923	40091932	colon_up
chr4	40129689	40130676	colon_up
chr4	40165060	40166094	colon_up
chr4	40181395	40182512	colon_up
chr4	40185367	40187783	colon_up
chr4	40214361	40217269	colon_up
chr4	40815658	40816665	colon_up
chr4	40820725	40822445	colon_up
chr4	40823551	40825038	colon_up
chr4	40848523	40849750	colon_up
chr4	40854378	40856477	colon_up
chr4	40861458	40862098	colon_up
chr4	40866566	40867648	colon_up
chr4	43454624	43457681	colon_up
chr4	43490885	43491639	colon_up
chr4	43492967	43494367	colon_up
chr4	57892653	57893433	colon_up
chr4	57913875	57914605	colon_up
chr4	57916945	57917977	colon_up
chr4	57926854	57927668	colon_up
chr4	57927770	57930491	colon_up
chr4	57932222	57933144	colon_up
chr4	57940498	57941214	colon_up
chr4	57958808	57960695	colon_up
chr4	57966425	57967799	colon_up
chr4	57968247	57970645	colon_up
chr4	58043999	58045340	colon_up
chr4	58045583	58046085	colon_up
chr4	58046813	58048273	colon_up
chr4	58057015	58057544	colon_up
chr4	58072726	58073938	colon_up
chr4	58077250	58078556	colon_up
chr4	58090424	58091505	colon_up
chr4	58092276	58093071	colon_up
chr4	58095335	58096457	colon_up
chr4	58265992	58266737	colon_up
chr4	58279100	58279580	colon_up
chr4	111086791	111089035	colon_up
chr4	111168471	111169083	colon_up
chr4	111262098	111262754	colon_up
chr4	111298761	111299572	colon_up
chr4	111318061	111318822	colon_up
chr4	111325924	111326703	colon_up
chr4	111336100	111337365	colon_up
chr4	111348597	111349423	colon_up
chr4	111359363	111360717	colon_up
chr4	111363458	111364360	colon_up
chr4	111391966	111394487	colon_up
chr4	111557958	111559743	colon_up
chr4	111569953	111571825	colon_up
chr4	111573571	111576372	colon_up
chr4	120254057	120254698	colon_up
chr4	120262180	120263216	colon_up
chr4	120287825	120291362	colon_up
chr4	120322020	120323000	colon_up
chr4	120338380	120341811	colon_up
chr4	120354403	120355368	colon_up
chr4	120368836	120371611	colon_up
chr4	120387661	120389878	colon_up
chr4	120401990	120404845	colon_up
chr4	120405930	120407574	colon_up
chr4	120418431	120421730	colon_up
chr4	122871471	122872261	colon_up
chr4	122877396	122880099	colon_up
chr4	122893953	122894646	colon_up
chr4	122896773	122897932	colon_up
chr4	124377067	124379012	colon_up
chr4	124385579	124387926	colon_up
chr4	124776575	124777187	colon_up
chr4	124791543	124794794	colon_up
chr4	124799361	124800840	colon_up
chr4	124801316	124803184	colon_up
chr4	124803858	124805915	colon_up
chr4	124811323	124812236	colon_up
chr4	124837396	124838965	colon_up
chr4	124897362	124898333	colon_up
chr4	124942397	124943505	colon_up
chr4	125095343	125096174	colon_up
chr4	125096471	125098945	colon_up
chr4	128806905	128808703	colon_up
chr4	128811913	128812884	colon_up
chr4	128813609	128815311	colon_up
chr4	128827990	128829125	colon_up
chr4	128838661	128839663	colon_up
chr4	130347619	130349679	colon_up
chr4	130393478	130396248	colon_up
chr4	130430236	130431148	colon_up
chr4	130434163	130435076	colon_up
chr4	130447283	130448853	colon_up
chr4	132302909	132304311	colon_up
chr4	132312401	132313444	colon_up
chr4	132495278	132495852	colon_up
chr4	132496623	132498021	colon_up
chr4	132500942	132503429	colon_up
chr4	132516034	132517559	colon_up
chr4	132529578	132532030	colon_up
chr4	132561093	132561632	colon_up
chr4	133623128	133625469	colon_up
chr4	133637097	133638739	colon_up
chr4	133643261	133643924	colon_up
chr4	133648054	133648835	colon_up
chr4	138289829	138290684	colon_up
chr4	138291296	138292397	colon_up
chr4	138292676	138294180	colon_up
chr4	138296466	138297093	colon_up
chr4	138302367	138305406	colon_up
chr4	138311840	138313022	colon_up
chr4	138347299	138349878	colon_up
chr4	138355604	138357329	colon_up
chr4	138367042	138368555	colon_up
chr4	138373500	138374256	colon_up
chr4	138380614	138384238	colon_up
chr4	138390120	138392776	colon_up
chr4	138406270	138407883	colon_up
chr4	138412309	138413217	colon_up
chr4	138415236	138416530	colon_up
chr4	138422299	138422923	colon_up
chr4	144803794	144805075	colon_up
chr4	144809454	144810038	colon_up
chr4	144820367	144821048	colon_up
chr4	144835041	144837219	colon_up
chr4	144844139	144844751	colon_up
chr4	144847328	144848416	colon_up
chr4	144854062	144855492	colon_up
chr4	144861492	144862159	colon_up
chr4	144867389	144869481	colon_up
chr4	144876244	144877145	colon_up
chr4	144885472	144886162	colon_up
chr4	144889646	144891295	colon_up
chr5	7710949	7711584	colon_up
chr5	7828862	7830065	colon_up
chr5	7862806	7863873	colon_up
chr5	7899509	7899982	colon_up
chr5	7911847	7912398	colon_up
chr5	7959907	7960916	colon_up
chr5	7964716	7965739	colon_up
chr5	7968059	7968718	colon_up
chr5	7971445	7973179	colon_up
chr5	7974528	7975396	colon_up
chr5	7993610	7994629	colon_up
chr5	7996275	7997150	colon_up
chr5	8045572	8046418	colon_up
chr5	20650202	20651019	colon_up
chr5	20659460	20659959	colon_up
chr5	20691194	20693013	colon_up
chr5	20693618	20695644	colon_up
chr5	20723531	20724231	colon_up
chr5	20763433	20764054	colon_up
chr5	20770778	20771448	colon_up
chr5	20832037	20832814	colon_up
chr5	20837215	20839108	colon_up
chr5	20868704	20869679	colon_up
chr5	52595294	52595820	colon_up
chr5	52607352	52608374	colon_up
chr5	52623104	52624146	colon_up
chr5	52631741	52632519	colon_up
chr5	52644949	52646679	colon_up
chr5	52730239	52731001	colon_up
chr5	52746558	52749524	colon_up
chr5	52751409	52752796	colon_up
chr5	52754451	52755749	colon_up
chr5	52802477	52805047	colon_up
chr5	52822374	52823183	colon_up
chr5	52845882	52846374	colon_up
chr5	52860941	52863256	colon_up
chr5	52866960	52868994	colon_up
chr5	52892147	52893197	colon_up
chr5	52906397	52908300	colon_up
chr5	52925733	52926672	colon_up
chr5	52927599	52928864	colon_up
chr5	52938045	52938664	colon_up
chr5	52942859	52944465	colon_up
chr5	52955228	52958530	colon_up
chr5	92777074	92778895	colon_up
chr5	92782145	92783131	colon_up
chr5	92788000	92788597	colon_up
chr5	96802187	96805097	colon_up
chr5	96831340	96832156	colon_up
chr5	97045808	97047626	colon_up
chr5	97106227	97107153	colon_up
chr5	97197719	97198683	colon_up
chr5	97210073	97211193	colon_up
chr5	97214759	97215822	colon_up
chr5	97217672	97218138	colon_up
chr5	97221433	97223858	colon_up
chr5	97224746	97225256	colon_up
chr5	97228190	97229985	colon_up
chr5	97230813	97232556	colon_up
chr5	97326564	97327645	colon_up
chr5	97334690	97335453	colon_up
chr5	97367741	97368234	colon_up
chr5	97369002	97370865	colon_up
chr5	97392818	97394396	colon_up
chr5	97397241	97398356	colon_up
chr5	115309125	115309834	colon_up
chr5	115325489	115326540	colon_up
chr5	115346914	115348029	colon_up
chr5	115371701	115373838	colon_up
chr5	121199168	121200605	colon_up
chr5	121226155	121228189	colon_up
chr5	121242784	121243730	colon_up
chr5	121256238	121257087	colon_up
chr5	121260983	121264025	colon_up
chr5	121272737	121273275	colon_up
chr5	121286689	121287796	colon_up
chr5	123077208	123077706	colon_up
chr5	123086005	123088264	colon_up
chr5	123093428	123094777	colon_up
chr5	123106665	123107543	colon_up
chr5	123112458	123113010	colon_up
chr5	123130101	123131276	colon_up
chr5	123138667	123140187	colon_up
chr5	123148074	123149226	colon_up
chr5	123149366	123151566	colon_up
chr5	124894669	124897138	colon_up
chr5	124900282	124901700	colon_up
chr5	124925154	124926099	colon_up
chr5	124927682	124928752	colon_up
chr5	124932451	124934301	colon_up
chr5	135662183	135664295	colon_up
chr5	135667445	135667932	colon_up
chr5	135712418	135712906	colon_up
chr5	135724213	135727568	colon_up
chr5	135739639	135741625	colon_up
chr5	135751680	135753281	colon_up
chr5	135761892	135762628	colon_up
chr5	135792118	135793124	colon_up
chr5	141323009	141323860	colon_up
chr5	141328247	141329284	colon_up
chr5	141344571	141346624	colon_up
chr5	141421907	141422522	colon_up
chr5	141438368	141439772	colon_up
chr5	141457236	141458211	colon_up
chr5	141471738	141473637	colon_up
chr5	141475886	141477043	colon_up
chr5	141482526	141483320	colon_up
chr5	141489354	141490235	colon_up
chr5	141517467	141519320	colon_up
chr5	141569453	141570407	colon_up
chr5	144885950	144888038	colon_up
chr5	144915368	144916094	colon_up
chr5	144918737	144920539	colon_up
chr5	144923904	144924483	colon_up
chr5	144950368	144952647	colon_up
chr5	144968167	144969835	colon_up
chr5	144975204	144975779	colon_up
chr6	29462848	29463937	colon_up
chr6	29466987	29467683	colon_up
chr6	29476032	29479866	colon_up
chr6	34876898	34878219	colon_up
chr6	34904744	34906516	colon_up
chr6	34936694	34939897	colon_up
chr6	34944515	34946379	colon_up
chr6	35082412	35084980	colon_up
chr6	40342773	40343700	colon_up
chr6	40351968	40352465	colon_up
chr6	40353478	40354283	colon_up
chr6	40373581	40374201	colon_up
chr6	40379370	40380135	colon_up
chr6	40381005	40381983	colon_up
chr6	40384731	40386616	colon_up
chr6	41554246	41557144	colon_up
chr6	41569590	41571263	colon_up
chr6	41585674	41586692	colon_up
chr6	41612226	41612822	colon_up
chr6	48575722	48580355	colon_up
chr6	48592651	48593273	colon_up
chr6	48696269	48697955	colon_up
chr6	48718299	48719449	colon_up
chr6	48721831	48722621	colon_up
chr6	48742311	48744156	colon_up
chr6	48767721	48768404	colon_up
[truncated: 549 more rows]

## Sheet: colon_down
TABLE S12: Genome coordinates of DHS within the regulatory domain of genes consistently up- or down-regulated in the ileum or colon of colonized vs. germ-free mice.
chrom	start	stop	category
chr1	13658437	13660232	colon_down
chr1	13689345	13690167	colon_down
chr1	13696170	13696916	colon_down
chr1	13774455	13775255	colon_down
chr1	13779233	13779864	colon_down
chr1	40659581	40660728	colon_down
chr1	40675809	40676479	colon_down
chr1	40687875	40688685	colon_down
chr1	40689092	40690543	colon_down
chr1	40713719	40715318	colon_down
chr1	40715609	40716615	colon_down
chr1	40736694	40740228	colon_down
chr1	40748350	40748927	colon_down
chr1	40752527	40753951	colon_down
chr1	40764703	40765171	colon_down
chr1	40765808	40766832	colon_down
chr1	40769722	40770603	colon_down
chr1	40796779	40798506	colon_down
chr1	40816695	40817414	colon_down
chr1	40821195	40822309	colon_down
chr1	40825291	40825905	colon_down
chr1	40827660	40828711	colon_down
chr1	40833507	40834422	colon_down
chr1	40846123	40848317	colon_down
chr1	54613475	54615394	colon_down
chr1	54653834	54654518	colon_down
chr1	54656553	54657901	colon_down
chr1	54658146	54659257	colon_down
chr1	54668572	54669684	colon_down
chr1	54714950	54716303	colon_down
chr1	54722512	54723340	colon_down
chr1	54724718	54725300	colon_down
chr1	54747275	54747918	colon_down
chr1	54763447	54764183	colon_down
chr1	54804459	54805288	colon_down
chr1	54889155	54890362	colon_down
chr1	54910278	54911505	colon_down
chr1	54953063	54954355	colon_down
chr1	54971086	54971669	colon_down
chr1	54978624	54979617	colon_down
chr1	54981839	54983993	colon_down
chr1	55108303	55110707	colon_down
chr1	58670592	58671033	colon_down
chr1	58709087	58710786	colon_down
chr1	58746811	58749690	colon_down
chr1	58754193	58754905	colon_down
chr1	74707676	74709727	colon_down
chr1	74750650	74751937	colon_down
chr1	74759355	74761507	colon_down
chr1	74772502	74774238	colon_down
chr1	75273705	75275085	colon_down
chr1	75311463	75314982	colon_down
chr1	88994942	88995812	colon_down
chr1	88996824	88999323	colon_down
chr1	93325082	93325668	colon_down
chr1	93339006	93340288	colon_down
chr1	93342343	93343792	colon_down
chr1	93349948	93353655	colon_down
chr1	93354711	93356966	colon_down
chr1	93357139	93357615	colon_down
chr1	93359810	93360577	colon_down
chr1	93360686	93362956	colon_down
chr1	93367207	93367877	colon_down
chr1	93379767	93380812	colon_down
chr1	106841155	106842075	colon_down
chr1	106882600	106883327	colon_down
chr1	106890301	106891477	colon_down
chr1	106979215	106979718	colon_down
chr1	106983897	106984759	colon_down
chr1	106985301	106986345	colon_down
chr1	106988898	106990953	colon_down
chr1	107002924	107004546	colon_down
chr1	107011215	107012384	colon_down
chr1	107055270	107056248	colon_down
chr1	107066010	107067673	colon_down
chr1	107072900	107074344	colon_down
chr1	107074966	107076799	colon_down
chr1	107095730	107096444	colon_down
chr1	107188150	107188892	colon_down
chr1	107210533	107211812	colon_down
chr1	107233732	107234569	colon_down
chr1	107251484	107254283	colon_down
chr1	107258900	107259816	colon_down
chr1	107446046	107446859	colon_down
chr1	107527031	107527474	colon_down
chr1	130140006	130142156	colon_down
chr1	130254943	130257388	colon_down
chr1	133661283	133662847	colon_down
chr1	133693261	133694869	colon_down
chr1	133712665	133713919	colon_down
chr1	155746076	155748907	colon_down
chr1	155751019	155751556	colon_down
chr1	155751649	155752131	colon_down
chr1	155756172	155756937	colon_down
chr1	155757545	155758936	colon_down
chr1	155769642	155770252	colon_down
chr1	155771373	155772523	colon_down
chr1	155777405	155778101	colon_down
chr1	155781253	155781919	colon_down
chr1	155784186	155784899	colon_down
chr1	155804823	155805672	colon_down
chr1	155809307	155809830	colon_down
chr1	155810392	155811624	colon_down
chr1	155816314	155817665	colon_down
chr1	155835171	155836056	colon_down
chr1	155839367	155840261	colon_down
chr1	155846584	155847453	colon_down
chr1	155850776	155851236	colon_down
chr1	155871282	155871994	colon_down
chr1	155879451	155880362	colon_down
chr1	155880967	155882325	colon_down
chr1	155883890	155884732	colon_down
chr1	155888003	155888534	colon_down
chr1	155889724	155890951	colon_down
chr1	155923692	155924571	colon_down
chr1	155927560	155928699	colon_down
chr1	155959374	155960123	colon_down
chr1	155964055	155966211	colon_down
chr1	155995606	155998751	colon_down
chr1	156003674	156004755	colon_down
chr1	156027357	156028688	colon_down
chr1	156029761	156030473	colon_down
chr1	156036609	156038055	colon_down
chr1	156051716	156052989	colon_down
chr1	156087320	156087942	colon_down
chr1	156128494	156129611	colon_down
chr1	156423480	156427806	colon_down
chr1	156481923	156484012	colon_down
chr1	156523128	156523949	colon_down
chr1	156572599	156575056	colon_down
chr1	156576341	156577243	colon_down
chr1	156632690	156633988	colon_down
chr1	156635231	156635929	colon_down
chr1	156638398	156640198	colon_down
chr1	156729934	156733631	colon_down
chr1	156801647	156804841	colon_down
chr1	156853386	156854589	colon_down
chr1	156860271	156862098	colon_down
chr1	156872893	156873561	colon_down
chr1	156874610	156876728	colon_down
chr1	156895924	156896675	colon_down
chr1	156910741	156912036	colon_down
chr1	156916549	156917429	colon_down
chr1	156918374	156919386	colon_down
chr1	156921137	156922570	colon_down
chr1	156929911	156932494	colon_down
chr1	156944409	156947233	colon_down
chr1	156987017	156987871	colon_down
chr10	6482122	6483376	colon_down
chr10	6492617	6493976	colon_down
chr10	6494443	6496126	colon_down
chr10	6505994	6506911	colon_down
chr10	6516391	6517353	colon_down
chr10	6518696	6519288	colon_down
chr10	6520146	6521672	colon_down
chr10	6526817	6527440	colon_down
chr10	6540708	6541512	colon_down
chr10	6569123	6570224	colon_down
chr10	6596052	6597197	colon_down
chr10	6604925	6606528	colon_down
chr10	6627614	6628901	colon_down
chr10	6641047	6641789	colon_down
chr10	6643161	6643788	colon_down
chr10	6645120	6646833	colon_down
chr10	6693553	6694289	colon_down
chr10	6753662	6755807	colon_down
chr10	6772264	6772686	colon_down
chr10	6773028	6773875	colon_down
chr10	6793004	6793655	colon_down
chr10	6805487	6806783	colon_down
chr10	6814633	6815269	colon_down
chr10	6831510	6832175	colon_down
chr10	6833019	6834347	colon_down
chr10	6838106	6838839	colon_down
chr10	6936837	6938692	colon_down
chr10	6978763	6980898	colon_down
chr10	21098334	21098919	colon_down
chr10	21102500	21103213	colon_down
chr10	21131358	21132095	colon_down
chr10	21140283	21141434	colon_down
chr10	21166066	21166826	colon_down
chr10	21167883	21168374	colon_down
chr10	21174337	21175215	colon_down
chr10	21184231	21186302	colon_down
chr10	21189662	21191009	colon_down
chr10	21210319	21212868	colon_down
chr10	21272739	21275092	colon_down
chr10	21285132	21285702	colon_down
chr10	21291230	21292268	colon_down
chr10	21293405	21294123	colon_down
chr10	21295397	21296764	colon_down
chr10	21320357	21321509	colon_down
chr10	21324651	21325618	colon_down
chr10	21328551	21330613	colon_down
chr10	21332435	21334080	colon_down
chr10	21392421	21393050	colon_down
chr10	21398300	21399105	colon_down
chr10	21404405	21406567	colon_down
chr10	21406950	21408023	colon_down
chr10	21414460	21415510	colon_down
chr10	21431821	21433579	colon_down
chr10	21434680	21435563	colon_down
chr10	21455999	21456524	colon_down
chr10	21496031	21497175	colon_down
chr10	21508825	21510630	colon_down
chr10	21524355	21525088	colon_down
chr10	21546387	21547665	colon_down
chr10	21572938	21573891	colon_down
chr10	21576394	21576994	colon_down
chr10	21601521	21602962	colon_down
chr10	21627508	21628137	colon_down
chr10	21666497	21667292	colon_down
chr10	21710855	21715525	colon_down
chr10	21715702	21716879	colon_down
chr10	21721296	21722221	colon_down
chr10	21724452	21725593	colon_down
chr10	21726664	21727998	colon_down
chr10	21729838	21730432	colon_down
chr10	21755772	21756520	colon_down
chr10	21777732	21779498	colon_down
chr10	23613934	23615904	colon_down
chr10	39450230	39453788	colon_down
chr10	39531163	39531782	colon_down
chr10	39617642	39619493	colon_down
chr10	39626525	39629573	colon_down
chr10	39645883	39647309	colon_down
chr10	39678825	39680878	colon_down
chr10	42581820	42585400	colon_down
chr10	42606678	42607349	colon_down
chr10	42607715	42608631	colon_down
chr10	42611928	42612739	colon_down
chr10	42630322	42630954	colon_down
chr10	42633463	42634899	colon_down
chr10	42644725	42645679	colon_down
chr10	42659483	42662442	colon_down
chr10	42665063	42665597	colon_down
chr10	42669679	42670747	colon_down
chr10	42677695	42678530	colon_down
chr10	42692360	42694422	colon_down
chr10	42705996	42707033	colon_down
chr10	42707131	42708931	colon_down
chr10	42709273	42710132	colon_down
chr10	42740036	42742783	colon_down
chr10	42793653	42794388	colon_down
chr10	42827188	42829520	colon_down
chr10	42841572	42842330	colon_down
chr10	42842988	42844100	colon_down
chr10	42874661	42875426	colon_down
chr10	42891946	42895642	colon_down
chr10	56058814	56059391	colon_down
chr10	56088784	56089457	colon_down
chr10	56092800	56093231	colon_down
chr10	56096611	56099570	colon_down
chr10	56144553	56145597	colon_down
chr10	56171120	56172175	colon_down
chr10	56173367	56174316	colon_down
chr10	56410688	56411952	colon_down
chr10	56490224	56491103	colon_down
chr10	56491269	56492324	colon_down
chr10	56560507	56561009	colon_down
chr10	56720840	56721722	colon_down
chr10	61873323	61874274	colon_down
chr10	61875208	61876861	colon_down
chr10	61878229	61879288	colon_down
chr10	61884720	61885841	colon_down
chr10	75580216	75581921	colon_down
chr10	75589009	75590134	colon_down
chr10	75609430	75610616	colon_down
chr10	75619746	75621424	colon_down
chr10	75649334	75650896	colon_down
chr10	75664684	75665374	colon_down
chr10	75665953	75667235	colon_down
chr10	75692387	75693641	colon_down
chr10	80544562	80545751	colon_down
chr10	80555032	80556270	colon_down
chr10	80557730	80558566	colon_down
chr10	80565103	80565539	colon_down
chr10	80855008	80856921	colon_down
chr10	80864246	80865151	colon_down
chr10	80871407	80872394	colon_down
chr10	80872854	80875618	colon_down
chr10	80876368	80877871	colon_down
chr10	80879142	80880554	colon_down
chr10	80886894	80888427	colon_down
chr10	80888776	80890243	colon_down
chr10	82447206	82450523	colon_down
chr10	82452120	82452833	colon_down
chr10	82453496	82454218	colon_down
chr10	82471522	82473278	colon_down
chr10	82494830	82496868	colon_down
chr10	82505238	82506977	colon_down
chr10	82532084	82533511	colon_down
chr10	82560937	82563071	colon_down
chr10	82576563	82577783	colon_down
chr10	82580719	82583374	colon_down
chr10	82583674	82584305	colon_down
chr10	82624469	82625122	colon_down
chr10	82644885	82646111	colon_down
chr10	82660403	82661151	colon_down
chr10	82682349	82683112	colon_down
chr10	82687534	82688408	colon_down
chr10	82693905	82694745	colon_down
chr10	82702127	82703107	colon_down
chr10	82706763	82707545	colon_down
chr10	82753466	82754314	colon_down
chr10	82785198	82786507	colon_down
chr10	82799592	82801138	colon_down
chr10	82805993	82807055	colon_down
chr10	84624196	84625037	colon_down
chr10	84637152	84638018	colon_down
chr10	84646037	84649350	colon_down
chr10	84683068	84685068	colon_down
chr10	84831398	84832255	colon_down
chr10	84833918	84835505	colon_down
chr10	84838240	84839231	colon_down
chr10	84841182	84842325	colon_down
chr10	93056575	93057471	colon_down
chr10	93082968	93084100	colon_down
chr10	93086301	93087398	colon_down
chr10	93092871	93093869	colon_down
chr10	93102819	93105468	colon_down
chr10	93128727	93129671	colon_down
chr10	93144358	93146285	colon_down
chr10	93150852	93152072	colon_down
chr10	93186712	93187730	colon_down
chr10	93221983	93222860	colon_down
chr10	93225795	93226441	colon_down
chr10	93239922	93240741	colon_down
chr10	93265924	93266455	colon_down
chr10	93275450	93276300	colon_down
chr10	93280737	93281962	colon_down
chr10	101839555	101840501	colon_down
chr10	101846789	101847220	colon_down
chr10	101897663	101898048	colon_down
chr10	101912044	101912569	colon_down
chr10	101914375	101914883	colon_down
chr10	101931823	101932978	colon_down
chr10	101961295	101961856	colon_down
chr10	115257832	115258442	colon_down
chr10	115266758	115267202	colon_down
chr10	115270606	115271932	colon_down
chr10	115454345	115456795	colon_down
chr10	115507738	115509629	colon_down
chr10	115520952	115521633	colon_down
chr10	115531365	115531841	colon_down
chr10	116729413	116730248	colon_down
chr10	116757127	116758200	colon_down
chr10	116767537	116768142	colon_down
chr10	116812661	116815212	colon_down
chr10	127113632	127115681	colon_down
chr10	127131605	127133315	colon_down
chr10	127138832	127141020	colon_down
chr10	127141145	127143111	colon_down
chr10	127309430	127309955	colon_down
chr10	127313939	127317287	colon_down
chr10	127329991	127331324	colon_down
chr10	128105521	128106651	colon_down
chr10	128109736	128112093	colon_down
chr11	6122866	6123981	colon_down
chr11	6151838	6153889	colon_down
chr11	6154580	6154999	colon_down
chr11	6161346	6162114	colon_down
chr11	12130838	12134028	colon_down
chr11	12191286	12192072	colon_down
chr11	12214249	12215136	colon_down
chr11	12231749	12232710	colon_down
chr11	12236074	12236679	colon_down
chr11	12259345	12259831	colon_down
chr11	12273198	12274083	colon_down
chr11	12290033	12291335	colon_down
chr11	12297794	12298433	colon_down
chr11	12302982	12304006	colon_down
chr11	12304740	12305318	colon_down
chr11	12305435	12306374	colon_down
chr11	12309304	12310207	colon_down
chr11	12311144	12312591	colon_down
chr11	12342050	12344104	colon_down
chr11	12363592	12365980	colon_down
chr11	12368516	12369395	colon_down
chr11	12373649	12374131	colon_down
chr11	12395602	12396432	colon_down
chr11	12416308	12416819	colon_down
chr11	12431941	12432975	colon_down
chr11	12459063	12459992	colon_down
chr11	12710741	12712640	colon_down
chr11	12742599	12744285	colon_down
chr11	12757721	12758521	colon_down
chr11	12772221	12773280	colon_down
chr11	12773607	12774337	colon_down
chr11	43341445	43343339	colon_down
chr11	43349666	43350387	colon_down
chr11	43361478	43364010	colon_down
chr11	43364974	43366041	colon_down
chr11	43378607	43379777	colon_down
chr11	43399453	43400352	colon_down
chr11	43423278	43424638	colon_down
chr11	43426384	43427331	colon_down
chr11	43439514	43441172	colon_down
chr11	43446892	43448060	colon_down
chr11	43456054	43457373	colon_down
chr11	43465902	43467596	colon_down
chr11	43469760	43470962	colon_down
chr11	43471145	43472158	colon_down
chr11	53163550	53165963	colon_down
chr11	53197212	53198292	colon_down
chr11	53269842	53271961	colon_down
chr11	53279662	53280671	colon_down
chr11	53283119	53284184	colon_down
chr11	53291648	53294043	colon_down
chr11	53296621	53297631	colon_down
chr11	53299919	53301334	colon_down
chr11	53815522	53817239	colon_down
chr11	53817340	53818910	colon_down
chr11	53840783	53842782	colon_down
chr11	53846158	53847127	colon_down
chr11	53867678	53868233	colon_down
chr11	53868787	53870204	colon_down
chr11	53872174	53875124	colon_down
chr11	61044617	61045819	colon_down
chr11	61048845	61051814	colon_down
chr11	61079649	61082385	colon_down
chr11	61132511	61134026	colon_down
chr11	61155324	61156947	colon_down
chr11	66844360	66845691	colon_down
chr11	66856068	66856934	colon_down
chr11	66858293	66858975	colon_down
chr11	66865077	66867288	colon_down
chr11	68901609	68903187	colon_down
chr11	68907977	68909503	colon_down
chr11	68910108	68911403	colon_down
chr11	68911967	68912966	colon_down
chr11	68913244	68913986	colon_down
chr11	68915827	68916352	colon_down
chr11	70288300	70289441	colon_down
chr11	70313555	70314101	colon_down
chr11	70318056	70319707	colon_down
chr11	70319733	70320384	colon_down
chr11	70323149	70324003	colon_down
chr11	70983071	70984644	colon_down
chr11	71011787	71013648	colon_down
chr11	71015730	71017784	colon_down
chr11	71038112	71038668	colon_down
chr11	71136477	71137538	colon_down
chr11	71207612	71209478	colon_down
chr11	71236388	71239281	colon_down
chr11	71325683	71327131	colon_down
chr11	71353823	71354888	colon_down
chr11	71361324	71364514	colon_down
chr11	71382944	71383864	colon_down
chr11	71403253	71403872	colon_down
chr11	71405946	71406619	colon_down
chr11	71509985	71511153	colon_down
chr11	73080537	73082214	colon_down
chr11	73092627	73095798	colon_down
chr11	73137483	73138614	colon_down
chr11	73139407	73141271	colon_down
chr11	74714511	74716789	colon_down
chr11	74738815	74740917	colon_down
chr11	76667915	76669019	colon_down
chr11	76669421	76671252	colon_down
chr11	76672005	76673144	colon_down
chr11	76686878	76687652	colon_down
chr11	76702829	76703905	colon_down
chr11	76706160	76708367	colon_down
chr11	76715270	76715883	colon_down
chr11	76722055	76722585	colon_down
chr11	76729815	76731324	colon_down
chr11	76736689	76737271	colon_down
chr11	76738195	76739163	colon_down
chr11	76753058	76753867	colon_down
chr11	84640818	84643279	colon_down
chr11	84682915	84685107	colon_down
chr11	96172397	96173824	colon_down
chr11	96177503	96178137	colon_down
chr11	96179269	96181918	colon_down
chr11	99104691	99105830	colon_down
chr11	99114015	99114871	colon_down
chr11	99117213	99117955	colon_down
chr11	99129891	99131225	colon_down
chr11	101988487	101989556	colon_down
chr11	101999481	102000373	colon_down
chr11	102001728	102002242	colon_down
chr11	102003436	102005223	colon_down
chr11	102006087	102008696	colon_down
chr11	103133153	103133850	colon_down
chr11	103153268	103154248	colon_down
chr11	103173237	103173802	colon_down
chr11	103186064	103187014	colon_down
chr11	103188138	103188769	colon_down
chr11	103193052	103195759	colon_down
chr11	103196204	103197256	colon_down
chr11	103198373	103199053	colon_down
chr11	103200899	103202572	colon_down
chr11	103207366	103208577	colon_down
chr11	103212133	103212823	colon_down
chr11	103216240	103218920	colon_down
chr11	103221454	103222293	colon_down
chr11	103222541	103225521	colon_down
chr11	103226555	103227850	colon_down
chr11	103243045	103244164	colon_down
chr11	103263442	103264013	colon_down
chr11	103267844	103268310	colon_down
chr11	103272490	103273034	colon_down
chr11	115020807	115021946	colon_down
chr11	115023997	115026930	colon_down
chr11	115028120	115029021	colon_down
chr11	115033696	115035699	colon_down
chr11	115038457	115039979	colon_down
chr11	115043172	115044562	colon_down
chr11	115307598	115310213	colon_down
chr11	115310464	115312100	colon_down
chr11	115317299	115318152	colon_down
chr11	115323262	115325392	colon_down
chr11	118805666	118808024	colon_down
chr11	118832702	118833709	colon_down
chr11	118836579	118837771	colon_down
chr11	118859663	118860662	colon_down
chr11	118868380	118869831	colon_down
chr12	32059371	32059960	colon_down
chr12	32061115	32061676	colon_down
chr12	32082380	32083165	colon_down
chr12	32085538	32086690	colon_down
chr12	32100660	32101268	colon_down
chr12	32106631	32107470	colon_down
chr12	32108196	32108823	colon_down
chr12	32113374	32114180	colon_down
chr12	32121961	32123284	colon_down
chr12	32123928	32125066	colon_down
chr12	32128887	32129530	colon_down
chr12	32138428	32139104	colon_down
chr12	32143229	32144083	colon_down
chr12	32147295	32148639	colon_down
chr12	32158962	32159626	colon_down
chr12	36292061	36292962	colon_down
chr12	36320510	36321398	colon_down
chr12	36358766	36359668	colon_down
chr12	36366245	36366923	colon_down
chr12	36372102	36372884	colon_down
chr12	36550835	36551874	colon_down
chr12	36553382	36554658	colon_down
chr12	36557176	36558368	colon_down
chr12	36569045	36570106	colon_down
chr12	36622709	36623839	colon_down
chr12	36651731	36652527	colon_down
chr12	36683840	36684228	colon_down
chr12	36692346	36693900	colon_down
chr12	36708000	36708844	colon_down
chr12	36711212	36711916	colon_down
chr12	52693753	52696586	colon_down
chr12	52742406	52743809	colon_down
chr12	52749201	52749707	colon_down
chr12	52772122	52772780	colon_down
chr12	52791615	52793698	colon_down
chr12	58672253	58674069	colon_down
chr12	58676610	58677741	colon_down
chr12	58686813	58687299	colon_down
chr12	58723083	58724727	colon_down
chr12	58763192	58766193	colon_down
chr12	58785856	58786652	colon_down
chr12	58792377	58793399	colon_down
chr12	58814296	58815027	colon_down
chr12	58876966	58878168	colon_down
chr12	58888230	58889383	colon_down
chr12	58900534	58901615	colon_down
chr12	58912170	58913050	colon_down
chr12	58931336	58932262	colon_down
chr12	58947834	58948408	colon_down
chr12	58991228	58993745	colon_down
chr12	59018073	59018619	colon_down
chr12	59073384	59074276	colon_down
chr12	59095786	59096738	colon_down
chr12	59131288	59132477	colon_down
chr12	59140425	59141356	colon_down
chr12	59168279	59170789	colon_down
chr12	59177281	59178395	colon_down
chr12	59297084	59297804	colon_down
chr12	59305809	59306709	colon_down
chr12	59311883	59316679	colon_down
chr12	59333319	59334004	colon_down
chr12	59368246	59370768	colon_down
chr12	70842889	70843451	colon_down
chr12	70858410	70860070	colon_down
chr12	70860274	70861343	colon_down
chr12	70861669	70862511	colon_down
chr12	70868230	70869281	colon_down
chr12	70876765	70877251	colon_down
chr12	70884066	70884998	colon_down
chr12	70886170	70886884	colon_down
chr12	70891000	70892804	colon_down
chr12	70927937	70930063	colon_down
chr12	70934620	70935727	colon_down
chr12	70963692	70965713	colon_down
chr12	70967849	70968837	colon_down
chr12	70973028	70974113	colon_down
chr12	70980017	70980848	colon_down
chr12	86728758	86731925	colon_down
chr12	86763257	86765210	colon_down
chr12	86768513	86769946	colon_down
chr12	86770392	86772837	colon_down
chr12	86790297	86791176	colon_down
chr12	86792350	86793876	colon_down
chr12	86795808	86797502	colon_down
chr12	86812824	86816434	colon_down
chr12	86826346	86829204	colon_down
chr12	86832864	86833764	colon_down
chr12	86837428	86839273	colon_down
chr12	86908751	86909973	colon_down
chr12	88228861	88230842	colon_down
chr12	88233276	88234263	colon_down
chr12	88234780	88236649	colon_down
chr12	88246177	88247814	colon_down
chr12	88259031	88260696	colon_down
chr12	88264355	88265352	colon_down
chr12	88285985	88286522	colon_down
chr12	88286953	88289358	colon_down
chr12	88289454	88290166	colon_down
chr12	88294812	88295310	colon_down
chr12	88296583	88297683	colon_down
chr12	88313771	88316280	colon_down
chr12	112456870	112457553	colon_down
chr12	112507717	112510539	colon_down
chr12	112510583	112511818	colon_down
chr12	112511869	112515278	colon_down
chr12	112529847	112535309	colon_down
chr12	112565103	112567077	colon_down
chr12	112590781	112592629	colon_down
chr12	112598786	112600887	colon_down
chr12	112611503	112612120	colon_down
chr12	112614296	112616879	colon_down
chr13	3923536	3924281	colon_down
chr13	3924730	3925746	colon_down
chr13	4058254	4060238	colon_down
chr13	4060616	4062026	colon_down
chr13	4109562	4110278	colon_down
chr13	4128276	4128881	colon_down
chr13	4132287	4132712	colon_down
chr13	4149569	4150244	colon_down
chr13	4152560	4153360	colon_down
chr13	4182253	4183106	colon_down
chr13	4189977	4191261	colon_down
chr13	4205229	4206273	colon_down
chr13	4231958	4233649	colon_down
chr13	4244208	4244983	colon_down
chr13	4263649	4265047	colon_down
chr13	4275849	4276278	colon_down
chr13	19529721	19530491	colon_down
chr13	19710728	19711997	colon_down
chr13	23977342	23977849	colon_down
chr13	24004413	24007415	colon_down
chr13	24009424	24010197	colon_down
chr13	24017724	24018636	colon_down
chr13	24019543	24021085	colon_down
chr13	36230898	36232823	colon_down
chr13	36240879	36242523	colon_down
chr13	36329646	36330251	colon_down
chr13	36345002	36345798	colon_down
chr13	36373884	36374394	colon_down
chr13	36388493	36390711	colon_down
chr13	36394329	36395313	colon_down
chr13	36406076	36407187	colon_down
chr13	36409036	36409654	colon_down
chr13	36421516	36422182	colon_down
chr13	36450422	36451564	colon_down
chr13	36517056	36519716	colon_down
chr13	36549892	36550740	colon_down
chr13	36668756	36671563	colon_down
chr13	36818289	36820559	colon_down
chr13	36821547	36824614	colon_down
chr13	36825406	36829066	colon_down
chr13	36881111	36881696	colon_down
chr13	36894697	36895583	colon_down
chr13	36916005	36917044	colon_down
chr13	36919897	36920432	colon_down
chr13	36920517	36921259	colon_down
chr13	36991243	36993973	colon_down
chr13	37136817	37137304	colon_down
chr13	37139240	37141718	colon_down
chr13	40837219	40838049	colon_down
chr13	40844253	40845499	colon_down
chr13	40879395	40880557	colon_down
chr13	40938752	40939375	colon_down
chr13	40946641	40948015	colon_down
chr13	40954779	40956752	colon_down
chr13	40970744	40971358	colon_down
chr13	41011449	41013987	colon_down
chr13	41023419	41024159	colon_down
chr13	41072895	41073609	colon_down
chr13	41757434	41758610	colon_down
chr13	41758937	41759592	colon_down
chr13	41775700	41778434	colon_down
chr13	41784247	41785323	colon_down
chr13	41802179	41802785	colon_down
chr13	41804563	41805488	colon_down
chr13	41825100	41826240	colon_down
chr13	41827109	41827662	colon_down
chr13	41853456	41857051	colon_down
chr13	41879232	41882401	colon_down
chr13	41912787	41913516	colon_down
chr13	41920653	41921670	colon_down
chr13	41922755	41924985	colon_down
chr13	41928844	41929583	colon_down
chr13	41941833	41942490	colon_down
chr13	41942702	41943566	colon_down
chr13	41967051	41968570	colon_down
chr13	41976096	41977305	colon_down
chr13	42005401	42006478	colon_down
chr13	42044298	42045293	colon_down
chr13	42050693	42051802	colon_down
chr13	56662410	56663239	colon_down
chr13	56676513	56677779	colon_down
chr13	56682780	56684527	colon_down
chr13	56689136	56691134	colon_down
chr13	56698775	56699810	colon_down
chr13	56701514	56702468	colon_down
chr13	56709162	56711747	colon_down
chr13	56716956	56718393	colon_down
chr13	56727407	56729315	colon_down
chr13	56731116	56733427	colon_down
chr13	56742948	56743643	colon_down
chr13	56749460	56750398	colon_down
chr13	56759173	56760568	colon_down
chr13	56779095	56781025	colon_down
chr13	56783271	56784359	colon_down
chr13	56793278	56794083	colon_down
chr13	67208307	67210666	colon_down
chr13	67214040	67214817	colon_down
chr13	67228456	67230174	colon_down
chr13	74107381	74109955	colon_down
chr13	74127589	74128563	colon_down
chr13	74131129	74132439	colon_down
chr13	74139843	74141102	colon_down
chr13	74145787	74148856	colon_down
chr13	74161880	74164523	colon_down
chr13	75844263	75847461	colon_down
chr13	75863628	75864866	colon_down
chr13	75889620	75890613	colon_down
chr13	75934753	75936863	colon_down
chr13	75968974	75969679	colon_down
chr13	75972664	75973457	colon_down
chr13	75976446	75979781	colon_down
chr13	75982884	75983950	colon_down
chr13	76011563	76012898	colon_down
chr13	76015300	76015836	colon_down
chr13	76078425	76079090	colon_down
chr13	76080185	76081720	colon_down
chr13	91993099	91995230	colon_down
chr13	92016085	92017458	colon_down
chr13	92028955	92029923	colon_down
chr13	92032398	92033226	colon_down
chr13	92047765	92048851	colon_down
chr13	92811085	92812739	colon_down
chr13	92863517	92864811	colon_down
chr13	92873922	92874686	colon_down
chr13	92899863	92902176	colon_down
chr13	96688359	96689051	colon_down
chr13	96690073	96690606	colon_down
chr13	96691522	96693472	colon_down
chr13	96693659	96695000	colon_down
chr13	96720395	96722022	colon_down
chr13	96729549	96732428	colon_down
chr13	96742948	96744306	colon_down
chr13	96780641	96781590	colon_down
chr13	96799848	96801464	colon_down
chr13	96900833	96904134	colon_down
chr13	96907918	96908929	colon_down
chr13	96938410	96939892	colon_down
chr13	96943000	96944073	colon_down
chr13	96945424	96946220	colon_down
chr13	96946350	96947584	colon_down
chr13	97143213	97143989	colon_down
chr14	11090645	11091955	colon_down
chr14	11228651	11230027	colon_down
chr14	11284199	11286723	colon_down
chr14	11313149	11314778	colon_down
chr14	11399890	11400815	colon_down
chr14	11401349	11402709	colon_down
chr14	11774076	11774863	colon_down
chr14	11957327	11958194	colon_down
chr14	11993064	11995303	colon_down
chr14	12162503	12162989	colon_down
chr14	12309970	12311219	colon_down
chr14	12318273	12319916	colon_down
chr14	12335510	12337164	colon_down
chr14	21870754	21872474	colon_down
chr14	21893663	21896326	colon_down
chr14	21901406	21902412	colon_down
chr14	21906567	21907354	colon_down
chr14	21909235	21910725	colon_down
chr14	21915733	21916612	colon_down
chr14	21918501	21919028	colon_down
chr14	21930668	21932643	colon_down
chr14	21955733	21956575	colon_down
chr14	21970987	21971959	colon_down
chr14	22091879	22092322	colon_down
chr14	22099632	22100346	colon_down
chr14	22123527	22124774	colon_down
chr14	22124807	22125411	colon_down
chr14	22164256	22164808	colon_down
chr14	22260574	22262140	colon_down
chr14	22272925	22273685	colon_down
chr14	22274740	22276361	colon_down
chr14	22277889	22278420	colon_down
chr14	22281310	22282596	colon_down
chr14	22303006	22304829	colon_down
chr14	28434525	28437411	colon_down
chr14	28479962	28481858	colon_down
chr14	28554308	28555416	colon_down
chr14	28616888	28617654	colon_down
chr14	28620941	28622222	colon_down
chr14	28635805	28637589	colon_down
chr14	28864442	28865398	colon_down
chr14	28902576	28903905	colon_down
chr14	28911855	28914395	colon_down
chr14	28975875	28977511	colon_down
chr14	29050855	29052647	colon_down
chr14	29211411	29213504	colon_down
chr14	29229917	29230817	colon_down
chr14	29268752	29270977	colon_down
chr14	29314168	29315327	colon_down
chr14	29316447	29321616	colon_down
chr14	29354952	29356301	colon_down
chr14	49790649	49793750	colon_down
chr14	49846567	49847114	colon_down
chr14	49854259	49855681	colon_down
chr14	49857692	49858750	colon_down
chr14	49878082	49879826	colon_down
chr14	49898555	49899089	colon_down
chr14	49968025	49969309	colon_down
chr14	50073328	50074518	colon_down
chr14	55363208	55363794	colon_down
chr14	55372639	55374404	colon_down
chr14	55378345	55379876	colon_down
chr14	55398979	55401163	colon_down
chr14	55404651	55406000	colon_down
chr14	55424586	55425576	colon_down
chr14	56376314	56377784	colon_down
chr14	56378901	56379459	colon_down
chr14	56380702	56381863	colon_down
chr14	65724151	65725353	colon_down
chr14	65730899	65732121	colon_down
chr14	65764365	65765119	colon_down
chr14	65767838	65769402	colon_down
chr14	65788549	65789881	colon_down
chr14	65880076	65881988	colon_down
chr14	66700719	66702073	colon_down
chr14	66704252	66704766	colon_down
chr14	66707020	66709101	colon_down
chr14	66709133	66710601	colon_down
chr14	66723619	66724490	colon_down
chr14	66738404	66738879	colon_down
chr14	66742636	66744250	colon_down
chr14	69856021	69856947	colon_down
chr14	69858878	69860033	colon_down
chr14	69872832	69876089	colon_down
chr14	69885003	69886707	colon_down
chr14	69887370	69888752	colon_down
chr14	69893633	69894978	colon_down
chr14	69896817	69897346	colon_down
chr14	69901288	69903935	colon_down
chr14	69906145	69908016	colon_down
chr14	69911337	69912520	colon_down
chr14	70869215	70870880	colon_down
chr14	70888977	70889849	colon_down
chr14	70897149	70898230	colon_down
chr14	70900215	70901218	colon_down
chr14	70918868	70921276	colon_down
chr14	80386356	80387156	colon_down
chr14	80668936	80669346	colon_down
chr14	81245265	81246089	colon_down
chr14	81300550	81302506	colon_down
chr14	84841988	84848605	colon_down
chr14	85613070	85613914	colon_down
chr15	3123366	3125402	colon_down
chr15	3151924	3152680	colon_down
chr15	3163697	3164173	colon_down
chr15	3164885	3165732	colon_down
chr15	3171244	3171870	colon_down
chr15	3172370	3173446	colon_down
chr15	3177528	3180002	colon_down
chr15	3196976	3198648	colon_down
chr15	3219342	3221748	colon_down
chr15	3247441	3248098	colon_down
chr15	3280260	3280741	colon_down
chr15	3306187	3307172	colon_down
chr15	3340611	3341245	colon_down
chr15	3391281	3392075	colon_down
chr15	3394283	3395110	colon_down
chr15	3414488	3415790	colon_down
chr15	3438715	3439753	colon_down
chr15	3528143	3529106	colon_down
chr15	3530097	3531001	colon_down
chr15	3531365	3533831	colon_down
chr15	3534153	3535398	colon_down
chr15	3907725	3908424	colon_down
chr15	10090080	10091442	colon_down
chr15	10106862	10108617	colon_down
chr15	10145381	10146389	colon_down
chr15	10155063	10156780	colon_down
chr15	10167873	10168739	colon_down
chr15	10215421	10216113	colon_down
chr15	10243336	10244266	colon_down
chr15	10512761	10513709	colon_down
chr15	10562999	10564392	colon_down
chr15	10582576	10583489	colon_down
chr15	10598272	10599027	colon_down
chr15	10615151	10616624	colon_down
chr15	10618334	10619503	colon_down
chr15	10619691	10621299	colon_down
chr15	10643038	10645892	colon_down
chr15	10688236	10689175	colon_down
chr15	10693138	10694310	colon_down
chr15	10747631	10749580	colon_down
chr15	10758376	10759734	colon_down
chr15	10760536	10761537	colon_down
chr15	10763338	10764828	colon_down
chr15	10794747	10795300	colon_down
chr15	10798475	10799330	colon_down
chr15	10801751	10802760	colon_down
chr15	10819533	10821220	colon_down
chr15	10830798	10831289	colon_down
chr15	10850414	10851481	colon_down
chr15	27119389	27119979	colon_down
chr15	27164438	27164995	colon_down
chr15	27245982	27246476	colon_down
chr15	27255189	27256932	colon_down
chr15	27258881	27259749	colon_down
chr15	27269883	27270811	colon_down
chr15	27271070	27271882	colon_down
chr15	27289814	27290753	colon_down
chr15	27354430	27355668	colon_down
chr15	27359301	27361322	colon_down
chr15	27362226	27363307	colon_down
chr15	27371646	27372093	colon_down
chr15	27373999	27375182	colon_down
chr15	27395254	27397320	colon_down
chr15	27407112	27408086	colon_down
chr15	27420804	27422813	colon_down
chr15	27435843	27437693	colon_down
chr15	27458560	27460406	colon_down
chr15	27482932	27483570	colon_down
chr15	27498230	27500373	colon_down
chr15	27507577	27509476	colon_down
chr15	27512257	27513229	colon_down
chr15	27542455	27543147	colon_down
chr15	27558477	27561192	colon_down
chr15	35112926	35114055	colon_down
chr15	35116000	35116461	colon_down
chr15	35222249	35224961	colon_down
chr15	35225118	35227231	colon_down
chr15	35232016	35233022	colon_down
chr15	35236231	35236842	colon_down
chr15	35255240	35256898	colon_down
chr15	35282044	35283016	colon_down
chr15	76336043	76336527	colon_down
chr15	76340818	76343085	colon_down
chr15	76363733	76365352	colon_down
chr15	76367999	76370602	colon_down
chr15	76372886	76373715	colon_down
chr15	76376096	76376624	colon_down
chr15	76378326	76378890	colon_down
chr15	76383106	76383565	colon_down
chr15	76385019	76385718	colon_down
chr15	76387794	76388644	colon_down
chr15	78675063	78676139	colon_down
chr15	78678849	78679406	colon_down
chr15	78682035	78682705	colon_down
chr15	78687394	78688130	colon_down
chr15	78689748	78690550	colon_down
chr15	78693570	78694853	colon_down
chr15	78700102	78700708	colon_down
chr15	79962844	79964887	colon_down
chr15	79970005	79972157	colon_down
chr15	79987565	79992060	colon_down
chr15	79999870	80000380	colon_down
chr15	80003239	80005281	colon_down
chr15	80019245	80020945	colon_down
chr15	80021769	80025437	colon_down
chr15	80038585	80039553	colon_down
chr15	80055443	80056146	colon_down
chr15	81574517	81577298	colon_down
chr15	81614763	81615991	colon_down
chr15	81632455	81633833	colon_down
chr15	81640477	81643536	colon_down
chr15	81661075	81662392	colon_down
chr15	81665956	81668180	colon_down
chr15	81669846	81670612	colon_down
chr15	81675978	81676833	colon_down
chr15	81678331	81679161	colon_down
chr15	81686272	81690819	colon_down
chr15	82223871	82226832	colon_down
chr15	85410231	85414484	colon_down
chr15	85429167	85431379	colon_down
chr15	85440782	85441755	colon_down
chr15	85443302	85445013	colon_down
chr15	85453430	85454352	colon_down
chr15	85455321	85457068	colon_down
chr15	85464608	85465991	colon_down
chr15	85475665	85477762	colon_down
chr15	85483226	85485066	colon_down
chr15	85499320	85502657	colon_down
chr15	85513114	85513730	colon_down
chr15	85514486	85516163	colon_down
chr15	85531291	85534179	colon_down
chr15	85539347	85541476	colon_down
chr15	85546347	85547144	colon_down
chr15	85564655	85567366	colon_down
chr15	85584436	85585582	colon_down
chr15	85597027	85597524	colon_down
chr15	85599106	85600005	colon_down
chr15	85601887	85603468	colon_down
chr15	85606616	85607778	colon_down
chr15	85640571	85642788	colon_down
chr15	97076643	97079903	colon_down
chr15	97206447	97208055	colon_down
chr15	97209886	97211681	colon_down
chr15	97301602	97303356	colon_down
chr15	97411806	97412847	colon_down
chr15	97493797	97495011	colon_down
chr15	97497721	97498768	colon_down
chr15	97502079	97504681	colon_down
chr16	10072974	10074243	colon_down
chr16	10088425	10089592	colon_down
chr16	10127685	10130147	colon_down
chr16	32430325	32432264	colon_down
chr16	32449736	32450248	colon_down
chr16	32462660	32464245	colon_down
chr16	32484215	32485038	colon_down
chr16	32487209	32488326	colon_down
chr16	32488949	32489569	colon_down
chr16	32499526	32500320	colon_down
chr16	32502871	32504353	colon_down
chr16	32507456	32508050	colon_down
chr16	32515984	32517036	colon_down
chr16	32517919	32518758	colon_down
chr16	32523407	32525131	colon_down
chr16	32551193	32552026	colon_down
chr16	32563003	32564025	colon_down
chr16	32589514	32590352	colon_down
chr16	32603143	32603768	colon_down
chr16	32607653	32609795	colon_down
chr16	32638456	32639098	colon_down
chr16	42807393	42808146	colon_down
chr16	42870966	42871663	colon_down
chr16	42874516	42877166	colon_down
chr16	42907205	42907992	colon_down
chr16	42955501	42956034	colon_down
chr16	43130199	43131931	colon_down
chr16	43168522	43169210	colon_down
chr16	43212023	43212436	colon_down
chr16	43277611	43278568	colon_down
chr16	43303215	43304221	colon_down
chr16	43309848	43311048	colon_down
chr16	43334469	43336202	colon_down
chr16	43385009	43386563	colon_down
chr16	43536993	43537868	colon_down
chr16	43539781	43540661	colon_down
chr16	43574033	43574602	colon_down
chr16	43576571	43578181	colon_down
chr16	43578990	43579781	colon_down
chr16	43586804	43587626	colon_down
chr16	43592871	43593365	colon_down
chr16	69980169	69981245	colon_down
chr16	70213851	70216162	colon_down
chr16	70313510	70315271	colon_down
chr16	70351912	70352595	colon_down
chr16	70353249	70353785	colon_down
chr16	70568465	70569439	colon_down
chr17	6398290	6399461	colon_down
chr17	6428768	6429679	colon_down
chr17	6654689	6655360	colon_down
chr17	6683965	6684923	colon_down
chr17	6889188	6890130	colon_down
chr17	6931566	6934178	colon_down
chr17	6935303	6936481	colon_down
chr17	6946527	6950191	colon_down
chr17	6966296	6966840	colon_down
chr17	6977542	6978599	colon_down
chr17	6980362	6982345	colon_down
chr17	12607825	12609738	colon_down
chr17	12678306	12679408	colon_down
chr17	12698587	12701164	colon_down
chr17	12723961	12725500	colon_down
chr17	12727156	12728177	colon_down
chr17	24976771	24977742	colon_down
chr17	24977969	24978585	colon_down
chr17	24981216	24982176	colon_down
chr17	24985426	24986125	colon_down
chr17	24986304	24988773	colon_down
chr17	28510685	28511333	colon_down
chr17	28511414	28513187	colon_down
chr17	28523059	28523963	colon_down
chr17	28544110	28545712	colon_down
chr17	28561049	28561789	colon_down
chr17	28571357	28572686	colon_down
chr17	28577995	28579989	colon_down
chr17	28621425	28623758	colon_down
chr17	28643359	28644276	colon_down
chr17	28647456	28650204	colon_down
chr17	28652433	28653505	colon_down
chr17	28654493	28656160	colon_down
chr17	28657459	28661403	colon_down
chr17	32591748	32592548	colon_down
chr17	32605208	32606070	colon_down
chr17	32618452	32620729	colon_down
chr17	32629124	32630031	colon_down
chr17	32631398	32632127	colon_down
chr17	32642646	32644443	colon_down
chr17	32664707	32666226	colon_down
chr17	32672948	32674382	colon_down
chr17	32687222	32688731	colon_down
chr17	32712931	32713519	colon_down
chr17	32713937	32715764	colon_down
chr17	33042080	33042874	colon_down
chr17	33052651	33053592	colon_down
chr17	33053724	33054812	colon_down
chr17	33055777	33056990	colon_down
chr17	33061389	33062500	colon_down
chr17	33064519	33065326	colon_down
chr17	33073416	33074085	colon_down
chr17	33083068	33085503	colon_down
chr17	33915743	33917103	colon_down
chr17	33917387	33919438	colon_down
chr17	33925516	33926160	colon_down
chr17	34486152	34486991	colon_down
chr17	34491341	34492305	colon_down
chr17	34506567	34508265	colon_down
chr17	34508928	34509403	colon_down
chr17	35050175	35053022	colon_down
chr17	35067776	35069266	colon_down
chr17	35079597	35080602	colon_down
chr17	35081237	35081884	colon_down
chr17	35087121	35088198	colon_down
chr17	35088675	35090018	colon_down
chr17	36281391	36283304	colon_down
chr17	36288144	36288575	colon_down
chr17	36294636	36295369	colon_down
chr17	36297935	36299269	colon_down
chr17	36315736	36316669	colon_down
chr17	36319037	36319753	colon_down
chr17	36326056	36327591	colon_down
chr17	36330350	36331016	colon_down
chr17	36342116	36343559	colon_down
chr17	36367951	36369037	colon_down
chr17	36374204	36374954	colon_down
chr17	36385612	36386326	colon_down
chr17	36389072	36389726	colon_down
chr17	36393704	36395692	colon_down
chr17	43532345	43533596	colon_down
chr17	43579008	43579866	colon_down
chr17	43595229	43596164	colon_down
chr17	43597175	43598142	colon_down
chr17	43624780	43626350	colon_down
chr17	43633046	43634112	colon_down
chr17	43636953	43637451	colon_down
chr17	43638641	43640162	colon_down
chr17	43640411	43642278	colon_down
chr17	43655453	43656228	colon_down
chr17	43671383	43672399	colon_down
chr17	43680887	43681531	colon_down
chr17	43694375	43696220	colon_down
chr17	43700384	43701092	colon_down
chr17	53932640	53933879	colon_down
chr17	53936514	53937149	colon_down
chr17	53972391	53973206	colon_down
chr17	53984568	53986744	colon_down
chr17	53993714	53994809	colon_down
chr17	54003983	54005482	colon_down
chr17	54013588	54014527	colon_down
chr17	56927857	56929264	colon_down
chr17	56947567	56948585	colon_down
chr17	56949317	56950903	colon_down
chr17	56953606	56954581	colon_down
chr17	56968663	56971380	colon_down
chr17	56997390	56998250	colon_down
chr17	57000535	57001274	colon_down
chr17	66308182	66309238	colon_down
chr17	66310710	66311661	colon_down
chr17	66375765	66376713	colon_down
chr17	66425155	66427253	colon_down
chr17	68622587	68624390	colon_down
chr17	68630026	68630968	colon_down
chr17	68637080	68639032	colon_down
chr17	68667934	68668689	colon_down
chr17	68682531	68683292	colon_down
chr17	68768662	68769268	colon_down
chr17	69079653	69080375	colon_down
chr17	69185662	69187456	colon_down
chr17	69189123	69192405	colon_down
chr17	69230542	69231855	colon_down
chr17	69272652	69274526	colon_down
chr17	69313965	69314859	colon_down
chr17	69327386	69328019	colon_down
chr17	69355561	69356067	colon_down
chr17	69411127	69412332	colon_down
chr17	69416653	69418445	colon_down
chr17	69423027	69423997	colon_down
chr17	69424650	69427705	colon_down
chr17	69452363	69453213	colon_down
chr17	69453956	69455189	colon_down
chr17	69504874	69507307	colon_down
chr17	69529963	69532102	colon_down
chr17	69542132	69543314	colon_down
chr17	69554283	69556278	colon_down
chr17	69569980	69571924	colon_down
chr17	69698309	69699013	colon_down
chr17	80493515	80496800	colon_down
chr17	80521063	80521804	colon_down
chr17	80526572	80529296	colon_down
chr17	80530574	80532563	colon_down
chr17	80547257	80548709	colon_down
chr17	80552098	80552837	colon_down
chr17	80576776	80578112	colon_down
chr17	80579256	80580120	colon_down
chr17	80604944	80607372	colon_down
chr17	81491938	81492987	colon_down
chr17	81589088	81590309	colon_down
chr17	81592702	81593920	colon_down
chr17	81891589	81892455	colon_down
chr17	81896800	81897772	colon_down
chr17	81926430	81926989	colon_down
chr17	81944500	81945520	colon_down
chr17	81951098	81952118	colon_down
chr17	81953415	81954872	colon_down
chr17	82035683	82036674	colon_down
chr17	82065785	82066432	colon_down
chr17	82067837	82070362	colon_down
chr17	82133424	82134326	colon_down
chr17	82134876	82135376	colon_down
chr17	82136411	82137158	colon_down
chr17	82142242	82142961	colon_down
chr17	82144555	82145499	colon_down
chr17	82145850	82146512	colon_down
chr17	82166575	82167734	colon_down
chr17	82186627	82187151	colon_down
chr17	82188376	82189133	colon_down
chr17	82189568	82190796	colon_down
chr17	82804620	82806145	colon_down
chr17	82950583	82951321	colon_down
chr17	85041225	85041730	colon_down
chr17	85049406	85050438	colon_down
chr17	85058139	85058827	colon_down
chr17	85064858	85065625	colon_down
chr17	85071354	85072924	colon_down
chr17	85074568	85075885	colon_down
chr17	85076646	85077981	colon_down
chr17	85081361	85083850	colon_down
chr17	85418020	85418636	colon_down
chr17	85422597	85424083	colon_down
chr17	85426553	85427170	colon_down
chr17	85427270	85428342	colon_down
chr17	85432220	85432928	colon_down
chr17	85442072	85443369	colon_down
chr17	85443804	85445989	colon_down
chr17	85451360	85452551	colon_down
chr17	85488914	85491096	colon_down
chr18	21159312	21161572	colon_down
chr18	21197187	21197848	colon_down
chr18	21205635	21207412	colon_down
chr18	21229321	21232385	colon_down
chr18	21242447	21243833	colon_down
chr18	21246431	21246966	colon_down
chr18	21262125	21263522	colon_down
chr18	21263967	21265090	colon_down
chr18	21267349	21268095	colon_down
chr18	21271987	21272684	colon_down
chr18	21274543	21275465	colon_down
chr18	21279981	21280903	colon_down
chr18	21291116	21291764	colon_down
chr18	21302505	21303545	colon_down
chr18	21304025	21304633	colon_down
chr18	21313957	21316148	colon_down
chr18	21347060	21347549	colon_down
chr18	21372368	21375022	colon_down
chr18	21392817	21394614	colon_down
chr18	21398712	21399489	colon_down
chr18	21449515	21450917	colon_down
chr18	21457044	21459851	colon_down
chr18	33651034	33652081	colon_down
chr18	33947138	33948114	colon_down
chr18	33949649	33950151	colon_down
chr18	33953744	33955485	colon_down
chr18	33966483	33967028	colon_down
chr18	33981684	33982791	colon_down
chr18	34008441	34009547	colon_down
chr18	34021652	34022941	colon_down
chr18	34091982	34092786	colon_down
chr18	34110098	34112141	colon_down
chr18	34112527	34113743	colon_down
chr18	34164514	34167380	colon_down
chr18	34197976	34198894	colon_down
chr18	34212165	34213481	colon_down
chr18	34239328	34240597	colon_down
chr18	34262333	34263335	colon_down
chr18	34268386	34269835	colon_down
chr18	34312193	34312870	colon_down
chr18	34316160	34316847	colon_down
chr18	34322527	34323460	colon_down
chr18	34569697	34570794	colon_down
chr18	34575457	34576048	colon_down
chr18	34665018	34667412	colon_down
chr18	34667688	34668191	colon_down
chr18	34670873	34671518	colon_down
chr18	34679206	34680254	colon_down
chr18	34681528	34683131	colon_down
chr18	34999744	35001907	colon_down
chr18	35009420	35010387	colon_down
chr18	35018720	35023913	colon_down
chr18	35046589	35048297	colon_down
chr18	35048395	35049073	colon_down
chr18	35060024	35061345	colon_down
chr18	35074927	35076090	colon_down
chr18	35090462	35092537	colon_down
chr18	36646250	36647306	colon_down
chr18	36663857	36664360	colon_down
chr18	36673126	36675969	colon_down
chr18	36676720	36677449	colon_down
chr18	36681457	36682189	colon_down
chr18	78012068	78013534	colon_down
chr18	78030707	78031178	colon_down
chr18	78032501	78035465	colon_down
chr18	78038278	78038985	colon_down
chr18	78087156	78088438	colon_down
chr18	78108361	78109412	colon_down
chr18	84845663	84846944	colon_down
chr18	84851118	84852376	colon_down
chr18	84853761	84855570	colon_down
chr18	84857631	84858160	colon_down
chr18	84876763	84878405	colon_down
chr19	5337526	5338446	colon_down
chr19	5347888	5349694	colon_down
chr19	5437546	5438282	colon_down
chr19	5442276	5442962	colon_down
chr19	5447286	5449142	colon_down
chr19	5487548	5489671	colon_down
chr19	5490143	5491937	colon_down
chr19	5500151	5501040	colon_down
chr19	6127622	6128609	colon_down
chr19	6139752	6141927	colon_down
chr19	10659331	10660014	colon_down
chr19	10676713	10678054	colon_down
chr19	10678193	10681084	colon_down
chr19	11033627	11034749	colon_down
chr19	11048456	11050043	colon_down
chr19	11053365	11055357	colon_down
chr19	11057210	11058216	colon_down
chr19	11062705	11063742	colon_down
chr19	17072041	17073007	colon_down
chr19	17085596	17086433	colon_down
chr19	17104521	17105340	colon_down
chr19	17155759	17156311	colon_down
chr19	17198398	17199393	colon_down
chr19	17211008	17211800	colon_down
chr19	17214187	17215864	colon_down
chr19	17237688	17238828	colon_down
chr19	17240083	17241216	colon_down
chr19	17330537	17332109	colon_down
chr19	17337550	17338747	colon_down
chr19	17357662	17358288	colon_down
chr19	17358791	17359224	colon_down
chr19	17384304	17386294	colon_down
chr19	17388843	17389337	colon_down
chr19	17390777	17391631	colon_down
chr19	17397581	17399431	colon_down
chr19	17409249	17410154	colon_down
chr19	17420295	17421824	colon_down
chr19	17430489	17431496	colon_down
chr19	17439190	17439671	colon_down
chr19	17459826	17460552	colon_down
chr19	17462803	17463366	colon_down
chr19	17467229	17470546	colon_down
chr19	17477682	17478166	colon_down
chr19	17484627	17486005	colon_down
chr19	17488122	17488668	colon_down
chr19	17489409	17490242	colon_down
chr19	17501507	17503546	colon_down
chr19	17513799	17514563	colon_down
chr19	17517779	17518881	colon_down
chr19	17541011	17541979	colon_down
chr19	17542008	17542810	colon_down
chr19	17603145	17605004	colon_down
chr19	17656616	17658025	colon_down
chr19	17667000	17668221	colon_down
chr19	17763517	17764189	colon_down
chr19	17765692	17766888	colon_down
chr19	17776471	17777724	colon_down
chr19	17818398	17819902	colon_down
chr19	17843772	17844963	colon_down
chr19	17850288	17851054	colon_down
chr19	17853991	17854487	colon_down
chr19	17855675	17856422	colon_down
chr19	17860689	17861863	colon_down
chr19	17875258	17875871	colon_down
chr19	17880939	17881859	colon_down
chr19	17887965	17888737	colon_down
chr19	17909947	17912978	colon_down
chr19	18652614	18653775	colon_down
chr19	20480426	20481448	colon_down
chr19	20494871	20495429	colon_down
chr19	20508852	20509474	colon_down
chr19	20512181	20512688	colon_down
chr19	20520682	20521123	colon_down
chr19	20523793	20524726	colon_down
chr19	20566349	20566973	colon_down
chr19	20621205	20622206	colon_down
chr19	20623737	20624384	colon_down
chr19	20626723	20627606	colon_down
chr19	20632963	20634279	colon_down
chr19	20675217	20677344	colon_down
chr19	20686996	20687603	colon_down
chr19	20708658	20709847	colon_down
chr19	20712584	20713165	colon_down
chr19	20714087	20714553	colon_down
chr19	20727138	20729499	colon_down
chr19	20788996	20789428	colon_down
chr19	20801642	20803474	colon_down
chr19	20838549	20839166	colon_down
chr19	20871778	20872983	colon_down
chr19	20906498	20907532	colon_down
chr19	20923364	20923832	colon_down
chr19	39135117	39135973	colon_down
chr19	43841921	43842778	colon_down
chr19	43850776	43851502	colon_down
chr19	43856330	43856998	colon_down
chr19	43883557	43884988	colon_down
chr19	43887134	43888687	colon_down
chr19	43906683	43907556	colon_down
chr19	43931747	43932239	colon_down
chr19	43948828	43950350	colon_down
chr19	43950468	43951112	colon_down
chr19	43953152	43954784	colon_down
chr19	43958657	43959988	colon_down
chr19	43961827	43962812	colon_down
chr19	43963694	43965616	colon_down
chr19	43968434	43969834	colon_down
chr19	43975086	43975965	colon_down
chr19	43978276	43979326	colon_down
chr19	43979509	43980968	colon_down
chr2	4637232	4640756	colon_down
chr2	4642269	4642841	colon_down
chr2	4785478	4786611	colon_down
chr2	13212205	13212787	colon_down
chr2	13215592	13216332	colon_down
chr2	13299826	13301464	colon_down
chr2	13318609	13319260	colon_down
chr2	13324289	13324965	colon_down
chr2	13335045	13335976	colon_down
chr2	13351341	13351990	colon_down
chr2	13391334	13392288	colon_down
chr2	13400357	13401653	colon_down
chr2	13405749	13406723	colon_down
chr2	13414382	13415359	colon_down
chr2	13430703	13431447	colon_down
chr2	13444682	13446153	colon_down
chr2	13447540	13448272	colon_down
chr2	13458322	13458843	colon_down
chr2	27064701	27068353	colon_down
chr2	27092498	27094016	colon_down
chr2	27101572	27104365	colon_down
chr2	27136181	27138210	colon_down
chr2	27139543	27141440	colon_down
chr2	27141527	27145365	colon_down
chr2	27223210	27225278	colon_down
chr2	27226268	27228077	colon_down
chr2	27266930	27268348	colon_down
chr2	27269221	27271234	colon_down
chr2	27271355	27272434	colon_down
chr2	27273706	27274665	colon_down
chr2	27280611	27283121	colon_down
chr2	29650042	29650502	colon_down
chr2	29657655	29659418	colon_down
chr2	29663302	29663823	colon_down
chr2	29672732	29673862	colon_down
chr2	29674945	29676512	colon_down
chr2	30055073	30056890	colon_down
chr2	30060212	30063177	colon_down
chr2	30084812	30085352	colon_down
chr2	30086639	30087276	colon_down
chr2	62160887	62161947	colon_down
chr2	62220571	62222136	colon_down
chr2	62228776	62229786	colon_down
chr2	62242954	62243460	colon_down
chr2	62248869	62250716	colon_down
chr2	62257860	62258843	colon_down
chr2	62278831	62279991	colon_down
chr2	62322854	62323464	colon_down
chr2	62338888	62339539	colon_down
chr2	62351257	62352396	colon_down
chr2	62373452	62374110	colon_down
chr2	62394877	62395846	colon_down
chr2	62400893	62402387	colon_down
chr2	68698064	68700991	colon_down
chr2	68708212	68708647	colon_down
chr2	68711557	68712790	colon_down
chr2	68717101	68717716	colon_down
chr2	68737263	68740087	colon_down
chr2	68748810	68749328	colon_down
chr2	68764362	68765688	colon_down
chr2	68768324	68768772	colon_down
chr2	68769422	68770977	colon_down
chr2	68772503	68773538	colon_down
chr2	68773665	68774483	colon_down
chr2	68782865	68784440	colon_down
chr2	68792703	68793766	colon_down
chr2	68815944	68817569	colon_down
chr2	68830109	68831337	colon_down
chr2	68838814	68840621	colon_down
chr2	68857733	68858638	colon_down
chr2	68872385	68873018	colon_down
chr2	68881267	68882092	colon_down
chr2	68898310	68900948	colon_down
chr2	68903159	68904573	colon_down
chr2	68938698	68939578	colon_down
chr2	68972140	68975169	colon_down
chr2	68986751	68988184	colon_down
chr2	69043194	69044951	colon_down
chr2	76207400	76209458	colon_down
chr2	76243519	76245715	colon_down
chr2	76255226	76256757	colon_down
chr2	76273669	76274616	colon_down
chr2	76326708	76328105	colon_down
chr2	76336364	76337678	colon_down
chr2	76356238	76357115	colon_down
chr2	76365408	76365957	colon_down
chr2	76380910	76381501	colon_down
chr2	76392517	76393106	colon_down
chr2	76393885	76394947	colon_down
chr2	76401793	76402377	colon_down
chr2	76408938	76410136	colon_down
chr2	76412689	76413592	colon_down
chr2	76413813	76414565	colon_down
chr2	76448082	76449328	colon_down
chr2	76449947	76450643	colon_down
chr2	76457953	76458876	colon_down
chr2	92263164	92264429	colon_down
chr2	92267827	92268568	colon_down
chr2	92271253	92273089	colon_down
chr2	92273559	92274760	colon_down
chr2	92277397	92278532	colon_down
chr2	92284076	92284921	colon_down
chr2	92285985	92287322	colon_down
chr2	92298627	92301204	colon_down
chr2	104582192	104584479	colon_down
chr2	104614951	104615358	colon_down
chr2	104655512	104659255	colon_down
chr2	118568925	118569462	colon_down
chr2	118570242	118573392	colon_down
chr2	118584973	118586484	colon_down
chr2	118587494	118588898	colon_down
chr2	118590081	118593132	colon_down
chr2	118595630	118596184	colon_down
chr2	118598035	118598795	colon_down
chr2	118600132	118600686	colon_down
chr2	122020247	122020808	colon_down
chr2	122032122	122033344	colon_down
chr2	122046940	122048376	colon_down
chr2	122053387	122054413	colon_down
chr2	122059585	122061710	colon_down
chr2	122066515	122068233	colon_down
chr2	122068808	122070711	colon_down
chr2	122085880	122087963	colon_down
chr2	122091567	122093431	colon_down
chr2	122110583	122112578	colon_down
chr2	126346479	126347030	colon_down
chr2	126378174	126379735	colon_down
chr2	126388647	126390483	colon_down
chr2	126397682	126398911	colon_down
chr2	126400966	126402151	colon_down
chr2	126419416	126420401	colon_down
chr2	126422402	126424539	colon_down
chr2	126432999	126434035	colon_down
chr2	148232506	148235897	colon_down
chr2	150136468	150138042	colon_down
chr2	150187013	150189075	colon_down
chr2	174484708	174487630	colon_down
chr2	174497907	174500313	colon_down
chr2	174500938	174501767	colon_down
chr2	174557308	174558165	colon_down
chr2	174572298	174575417	colon_down
chr2	174585459	174587553	colon_down
chr2	174593367	174594089	colon_down
chr2	174599071	174600958	colon_down
chr2	174621966	174623201	colon_down
chr2	174676737	174678318	colon_down
chr2	174683367	174686101	colon_down
chr2	174696240	174698337	colon_down
chr2	174725357	174726842	colon_down
chr2	174730291	174732162	colon_down
chr2	174747701	174748121	colon_down
chr2	174757251	174758844	colon_down
chr2	180048733	180049810	colon_down
chr2	180050517	180051197	colon_down
chr2	180056980	180058239	colon_down
chr2	180068280	180070690	colon_down
chr2	180075455	180079280	colon_down
chr2	180081086	180082490	colon_down
chr2	180087939	180090371	colon_down
chr2	180133767	180135742	colon_down
chr2	180166171	180168233	colon_down
chr2	180189973	180192849	colon_down
chr3	40602333	40605066	colon_down
chr3	40648627	40649760	colon_down
chr3	40650191	40651918	colon_down
chr3	50260324	50260995	colon_down
chr3	50327643	50328489	colon_down
chr3	50333499	50334261	colon_down
chr3	50357072	50358862	colon_down
chr3	50461413	50462277	colon_down
chr3	50478556	50480072	colon_down
chr3	50670680	50671951	colon_down
chr3	50690407	50691780	colon_down
chr3	50707817	50710995	colon_down
chr3	50823077	50824423	colon_down
chr3	50833718	50834336	colon_down
chr3	50851458	50852223	colon_down
chr3	50922303	50923193	colon_down
chr3	50925849	50926568	colon_down
chr3	50960213	50961543	colon_down
chr3	50974083	50975142	colon_down
chr3	50989750	50990563	colon_down
chr3	50994319	50995172	colon_down
chr3	50999149	50999687	colon_down
chr3	51003958	51007208	colon_down
chr3	51027671	51029568	colon_down
chr3	51036040	51036692	colon_down
chr3	51037285	51038971	colon_down
chr3	51079751	51082086	colon_down
chr3	51092855	51093760	colon_down
chr3	62958734	62959475	colon_down
chr3	62960631	62961642	colon_down
chr3	62963090	62964249	colon_down
chr3	63098798	63100982	colon_down
chr3	63101614	63102752	colon_down
chr3	63147721	63148200	colon_down
chr3	63188762	63189652	colon_down
chr3	63275889	63276724	colon_down
chr3	63312688	63313917	colon_down
chr3	63358531	63359382	colon_down
chr3	63364038	63365546	colon_down
chr3	63374158	63375373	colon_down
chr3	63413368	63414572	colon_down
chr3	63532098	63534398	colon_down
chr3	63610660	63611814	colon_down
chr3	63617922	63619229	colon_down
chr3	63623969	63624625	colon_down
chr3	63627774	63629320	colon_down
chr3	72869791	72870645	colon_down
chr3	73273652	73274721	colon_down
chr3	73376562	73377741	colon_down
chr3	73426369	73426967	colon_down
chr3	73472038	73472835	colon_down
chr3	73476964	73477945	colon_down
chr3	73511512	73512940	colon_down
chr3	73521291	73522748	colon_down
chr3	73535562	73536122	colon_down
chr3	73546615	73547103	colon_down
chr3	74337845	74338467	colon_down
chr3	80762417	80763167	colon_down
chr3	80781864	80783102	colon_down
chr3	80820934	80822334	colon_down
chr3	80839843	80842015	colon_down
chr3	80842696	80843849	colon_down
chr3	80905944	80906943	colon_down
chr3	81000567	81002659	colon_down
chr3	81093308	81094145	colon_down
chr3	81339146	81340238	colon_down
chr3	81409425	81410370	colon_down
chr3	81639134	81640284	colon_down
chr3	81663880	81665025	colon_down
chr3	81726572	81727248	colon_down
chr3	81728790	81729277	colon_down
chr3	82706298	82708846	colon_down
chr3	82748400	82751233	colon_down
chr3	82798653	82800033	colon_down
chr3	82802766	82804576	colon_down
chr3	82806048	82806597	colon_down
chr3	87598427	87600058	colon_down
chr3	87600300	87601618	colon_down
chr3	87605120	87606344	colon_down
chr3	87607319	87608792	colon_down
chr3	87619423	87621478	colon_down
chr3	87642458	87643145	colon_down
chr3	95685297	95687380	colon_down
chr3	95688132	95689064	colon_down
chr3	95691475	95692010	colon_down
chr3	96631815	96634398	colon_down
chr3	96649526	96650678	colon_down
chr3	96704955	96705721	colon_down
chr3	96706152	96707053	colon_down
chr3	97418935	97419492	colon_down
chr3	97424543	97425205	colon_down
chr3	97431738	97433248	colon_down
chr3	97438000	97438971	colon_down
chr3	110051655	110055064	colon_down
chr3	110261677	110262235	colon_down
chr3	110429184	110429930	colon_down
chr3	117897616	117898194	colon_down
chr3	118131236	118131879	colon_down
chr3	118133985	118134697	colon_down
chr3	118136293	118138285	colon_down
chr3	118210558	118211147	colon_down
chr3	118264484	118266694	colon_down
chr3	118269623	118270383	colon_down
chr3	118297652	118299201	colon_down
chr3	118304434	118305903	colon_down
chr3	118383384	118384149	colon_down
chr3	118825349	118826404	colon_down
chr3	118827993	118829648	colon_down
chr3	118861081	118862164	colon_down
chr3	119017325	119018081	colon_down
chr3	122431339	122434315	colon_down
chr3	122464512	122467443	colon_down
chr3	122532199	122533408	colon_down
chr3	122562070	122564712	colon_down
chr3	122579526	122580837	colon_down
chr3	122581341	122582321	colon_down
chr3	122587381	122588433	colon_down
chr3	122590343	122591929	colon_down
chr3	122597644	122598691	colon_down
chr3	122606683	122607461	colon_down
chr3	122620983	122621671	colon_down
chr3	125551971	125552505	colon_down
chr3	125587245	125588260	colon_down
chr3	125623691	125624214	colon_down
chr3	125640187	125642262	colon_down
chr3	125686465	125687521	colon_down
chr3	125691675	125692198	colon_down
chr3	125718385	125719043	colon_down
chr3	130990578	130991097	colon_down
chr3	131002709	131003299	colon_down
chr3	131005278	131006812	colon_down
chr3	131013430	131013897	colon_down
chr3	131015251	131015932	colon_down
chr3	131023014	131023817	colon_down
chr3	131036497	131038628	colon_down
chr3	131045194	131046665	colon_down
chr3	137956287	137956919	colon_down
chr3	137968332	137970082	colon_down
chr3	137972746	137974357	colon_down
chr3	137975438	137976439	colon_down
chr3	138002508	138003172	colon_down
chr3	138081444	138083376	colon_down
chr3	138105052	138106709	colon_down
chr3	138112703	138113670	colon_down
chr3	144595281	144597364	colon_down
chr3	144627838	144629920	colon_down
chr3	144634394	144635545	colon_down
chr3	153575200	153577189	colon_down
chr3	153579966	153580757	colon_down
chr3	153605731	153608432	colon_down
chr4	7238918	7242413	colon_down
chr4	7315661	7316139	colon_down
chr4	7318721	7319311	colon_down
chr4	7477183	7478062	colon_down
chr4	7746740	7747423	colon_down
chr4	7780151	7781005	colon_down
chr4	7904789	7905463	colon_down
chr4	7932244	7932852	colon_down
chr4	8011893	8012662	colon_down
chr4	8117545	8118040	colon_down
chr4	8145045	8145682	colon_down
chr4	8164717	8167385	colon_down
chr4	8172122	8173294	colon_down
chr4	8219027	8222050	colon_down
chr4	8236236	8239383	colon_down
chr4	8293962	8295513	colon_down
chr4	8307754	8308742	colon_down
chr4	8359490	8360342	colon_down
chr4	8437083	8437969	colon_down
chr4	46558184	46558900	colon_down
chr4	46566513	46568246	colon_down
chr4	46571385	46572792	colon_down
chr4	46572986	46573742	colon_down
chr4	46576543	46577340	colon_down
chr4	46579761	46580458	colon_down
chr4	46606443	46607525	colon_down
chr4	46610184	46611387	colon_down
chr4	46612081	46612920	colon_down
chr4	46613600	46615917	colon_down
chr4	46623832	46624912	colon_down
chr4	46632846	46633935	colon_down
chr4	46641113	46643960	colon_down
chr4	46655711	46657003	colon_down
chr4	46661881	46664504	colon_down
chr4	49482517	49483081	colon_down
chr4	49491169	49491890	colon_down
chr4	49492979	49494250	colon_down
chr4	49494978	49495854	colon_down
chr4	49498255	49499899	colon_down
chr4	49559898	49561380	colon_down
chr4	49561839	49562861	colon_down
chr4	49566146	49566679	colon_down
chr4	49572363	49573635	colon_down
chr4	49580330	49581026	colon_down
chr4	49602648	49603601	colon_down
chr4	49607350	49608085	colon_down
chr4	49609630	49610952	colon_down
chr4	61838252	61838739	colon_down
chr4	61845670	61846251	colon_down
chr4	61860947	61861735	colon_down
chr4	61868583	61870866	colon_down
chr4	61888940	61890036	colon_down
chr4	61890448	61890858	colon_down
chr4	61917938	61918366	colon_down
chr4	61935757	61936527	colon_down
chr4	61939022	61939547	colon_down
chr4	73658543	73660919	colon_down
chr4	73863877	73864542	colon_down
chr4	73876893	73877860	colon_down
chr4	94317322	94317965	colon_down
chr4	94326886	94328112	colon_down
chr4	94336402	94336834	colon_down
chr4	94399348	94399877	colon_down
chr4	96218790	96220980	colon_down
chr4	96234349	96235520	colon_down
chr4	96247010	96247529	colon_down
chr4	96257129	96259103	colon_down
chr4	108291154	108293645	colon_down
chr4	108310029	108310686	colon_down
chr4	108314477	108315808	colon_down
chr4	108336890	108337483	colon_down
chr4	108369453	108370034	colon_down
chr4	108393763	108394428	colon_down
chr4	108403039	108403524	colon_down
chr4	108431988	108432762	colon_down
chr4	108452298	108454671	colon_down
chr4	108470891	108471496	colon_down
chr4	115315561	115317034	colon_down
chr4	115317527	115318645	colon_down
chr4	115320027	115320864	colon_down
chr4	115329572	115330730	colon_down
chr4	115331629	115332483	colon_down
chr4	115376553	115377901	colon_down
chr4	115382192	115383145	colon_down
chr4	115404092	115405640	colon_down
chr4	116805522	116807254	colon_down
chr4	116807952	116809481	colon_down
chr4	116810841	116812316	colon_down
chr4	116816708	116817284	colon_down
chr4	116818693	116819259	colon_down
chr4	116827688	116829076	colon_down
chr4	117980034	117981421	colon_down
chr4	117998869	117999678	colon_down
chr4	118009139	118009773	colon_down
chr4	118028775	118030537	colon_down
chr4	118031980	118034772	colon_down
chr4	119485390	119488526	colon_down
chr4	119488666	119490136	colon_down
chr4	119505832	119507168	colon_down
chr4	119515586	119517389	colon_down
chr4	119524480	119526188	colon_down
chr4	119562107	119562953	colon_down
chr4	119583212	119585391	colon_down
chr4	119586375	119588164	colon_down
chr4	119610048	119612020	colon_down
chr4	119619824	119621438	colon_down
chr4	119631451	119632929	colon_down
chr4	119656660	119657755	colon_down
chr4	119703764	119706336	colon_down
chr4	119709439	119711297	colon_down
chr4	119743650	119745479	colon_down
chr4	119745656	119747318	colon_down
chr4	119776377	119777881	colon_down
chr4	119792611	119793429	colon_down
chr4	119801901	119802852	colon_down
chr4	119803934	119804701	colon_down
chr4	119814114	119816161	colon_down
chr4	119816718	119817604	colon_down
chr4	119820932	119822205	colon_down
chr4	119833332	119836393	colon_down
chr4	119840273	119840926	colon_down
chr4	119842862	119843688	colon_down
chr4	119851648	119852775	colon_down
chr4	119852997	119853639	colon_down
chr4	119862221	119863385	colon_down
chr4	119864289	119865588	colon_down
chr4	119868414	119869170	colon_down
chr4	119887142	119889037	colon_down
chr4	119895595	119897039	colon_down
chr4	119897739	119898527	colon_down
chr4	119902094	119904030	colon_down
chr4	119939658	119942427	colon_down
chr4	119947857	119948723	colon_down
chr4	119954754	119956390	colon_down
chr4	119958735	119961636	colon_down
chr4	149163594	149164408	colon_down
chr4	149164693	149166964	colon_down
chr4	149167262	149168593	colon_down
chr4	149180724	149181327	colon_down
chr4	149194271	149195441	colon_down
chr4	149195614	149197199	colon_down
chr4	149215781	149216448	colon_down
chr4	149228192	149229535	colon_down
chr4	149256749	149260181	colon_down
chr4	149260619	149261604	colon_down
chr4	149282635	149285037	colon_down
chr4	149307589	149308599	colon_down
chr4	149327730	149330066	colon_down
chr4	149353744	149354521	colon_down
chr4	149362748	149363797	colon_down
chr4	149460901	149462647	colon_down
chr4	149463784	149464520	colon_down
chr4	149467457	149468565	colon_down
chr4	149472760	149473578	colon_down
chr4	149479809	149480616	colon_down
chr4	149486739	149487416	colon_down
chr4	149488545	149489279	colon_down
chr4	149492993	149495335	colon_down
chr4	149495534	149496478	colon_down
chr4	149506595	149507853	colon_down
chr4	149508296	149509281	colon_down
chr4	149510565	149511416	colon_down
chr4	149512003	149512957	colon_down
chr4	150400922	150401517	colon_down
chr4	150410629	150411529	colon_down
chr4	150417394	150419673	colon_down
chr5	9027975	9028778	colon_down
chr5	9033832	9035456	colon_down
chr5	9055864	9056607	colon_down
chr5	9057220	9058551	colon_down
chr5	9059202	9059850	colon_down
chr5	9079882	9080865	colon_down
chr5	9099891	9102311	colon_down
chr5	9108353	9109119	colon_down
chr5	9111428	9112265	colon_down
chr5	9160639	9163100	colon_down
chr5	31218008	31218879	colon_down
chr5	31222712	31225123	colon_down
chr5	31245082	31245836	colon_down
chr5	33360315	33362689	colon_down
chr5	33374439	33375479	colon_down
chr5	33375717	33376337	colon_down
chr5	33376708	33377237	colon_down
chr5	33381977	33382911	colon_down
chr5	33385964	33386888	colon_down
chr5	33395471	33396446	colon_down
chr5	33433775	33434525	colon_down
chr5	33438835	33439342	colon_down
chr5	33446121	33448804	colon_down
chr5	33448994	33449554	colon_down
chr5	33450263	33451412	colon_down
chr5	33464163	33465131	colon_down
chr5	33478019	33479201	colon_down
chr5	33483949	33486328	colon_down
chr5	33486531	33487084	colon_down
chr5	33545737	33546998	colon_down
chr5	33557899	33563979	colon_down
chr5	38725792	38726306	colon_down
chr5	38737625	38738519	colon_down
chr5	38755855	38759179	colon_down
chr5	38786551	38788983	colon_down
chr5	38860951	38861942	colon_down
chr5	38869969	38872902	colon_down
chr5	38888971	38890366	colon_down
chr5	38940427	38942829	colon_down
chr5	38944441	38945811	colon_down
chr5	38947471	38948407	colon_down
chr5	38951278	38954600	colon_down
chr5	44199015	44199877	colon_down
chr5	44201616	44202627	colon_down
chr5	44215602	44217185	colon_down
chr5	44232319	44233503	colon_down
chr5	44243669	44244138	colon_down
chr5	44250744	44252776	colon_down
chr5	44254723	44255679	colon_down
chr5	45277600	45278569	colon_down
chr5	45668539	45670723	colon_down
chr5	45683096	45684155	colon_down
chr5	45793722	45794556	colon_down
chr5	45810852	45811941	colon_down
chr5	45815022	45816008	colon_down
chr5	45826756	45828146	colon_down
chr5	45839697	45842153	colon_down
chr5	53269850	53270540	colon_down
chr5	53278264	53279024	colon_down
chr5	53282664	53284109	colon_down
chr5	53301350	53302129	colon_down
chr5	53366330	53367306	colon_down
chr5	53370255	53371730	colon_down
chr5	53381413	53382555	colon_down
chr5	53390467	53392226	colon_down
chr5	53409333	53410348	colon_down
chr5	53410846	53411455	colon_down
chr5	53414278	53416166	colon_down
chr5	53433242	53435505	colon_down
chr5	53435637	53437257	colon_down
chr5	53439195	53441623	colon_down
chr5	53452254	53453770	colon_down
chr5	53464643	53465395	colon_down
chr5	53465661	53466325	colon_down
chr5	53469506	53470419	colon_down
chr5	53475124	53476117	colon_down
chr5	53492711	53494184	colon_down
chr5	53494373	53496114	colon_down
chr5	53497967	53499910	colon_down
chr5	53499952	53502377	colon_down
chr5	53514740	53515408	colon_down
chr5	53578137	53579406	colon_down
chr5	53587348	53588798	colon_down
[truncated: 1,153 more rows]
