# Supplementary material for: Microbiota modulate transcription in the intestinal epithelium without remodeling the accessible chromatin landscape
Source: HighWire-hosted journal article supplement (doi:10.1101/gr.165845.113), 2014-06-24
Supplement: Supplemental_TableS13.xlsx [file Supplemental_TableS13.xlsx]

## Sheet: Summary
TABLE S13: Motif prediction in DHS near genes consistently up or down-regulated in colonized vs. germ-free ileum and colon
		Fold over Bkgd
Motif Name	Consensus	Ileum Down	Ileum Up	Colon Down	Colon Up
T1ISRE(IRF)/Ifnb-Exp/Homer	ACTTTCGTTTCT	0.819672	1.86667	0.537037	2.10909
ISRE(IRF)/ThioMac-LPS-exp(GSE23622)/HOMER	AGTTTCASTTTC	1.4434	2.12017	1.48558	2.19712
IRF1(IRF)/PBMC-IRF1-ChIP-Seq(GSE43036)/Homer	GAAAGTGAAAGT	1.28107	1.64134	1.10454	1.5751
NF1:FOXA1/LNCAP-FOXA1-ChIP-Seq(GSE27824)/Homer	WNTGTTTRYTTTGGCA	1.41546	1.02857	1.32738	1.81013
Unknown3/Drosophila-Promoters/Homer	ACVAKCTGGCAGCGC	1.15556	1.14392	1.02827	1.37582
NFkB-p65-Rel(RHD)/LPS-exp(GSE23622)/Homer	GGAAATTCCC	1.4913	2.00403	1.91026	2.42038
E2F7(E2F)/Hela-E2F7-ChIP-Seq(GSE32673)/Homer	VDTTTCCCGCCA	1.12538	1.25263	1.17939	1.4932
REB1/SacCer-Promoters/Homer	KCCGGGTAAYRR	1.23315	1.04667	1.0071	1.2565
GEI-11(Myb?)/cElegans-L4-GEI11-ChIP-Seq(modEncode)/Homer	CCGACAYYTYACGGG	1.12432	1.20942	0.926471	1.11628
E2F1(E2F)/Hela-E2F1-ChIP-Seq(GSE22478)/Homer	CWGGCGGGAA	1.05368	1.24566	1.12665	1.34536
Mouse_Recombination_Hotspot/Testis-DMC1-ChIP-Seq(GSE24438)/Homer	ACTYKNATTCGTGNTACTTC	1.10332	0.921708	1.12322	1.33171
Unknown3/Arabidopsis-Promoters/Homer	AYTAAACCGG	1.13636	1.16301	1.05123	1.24597
CTCF-SatelliteElement/CD4+-CTCF-ChIP-Seq(Barski et al.)/Homer	TGCAGTTCCMVNWRTGGCCA	0.981308	1.34783	1.6875	2
Rfx2(HTH)/LoVo-RFX2-ChIP-Seq(GSE49402)/Homer	GTTGCCATGGCAACM	1.2642	1.07627	1.17021	1.36585
RFX(HTH)/K562-RFX3-ChIP-Seq(SRA012198)/Homer	CGGTTGCCATGGCAAC	1.36286	1.12649	1.14394	1.33007
Unknown1/Arabidopsis-Promoters/Homer	RGGGTAWWWTHGTAA	1.07292	1.10099	0.983278	1.13826
IRF2(IRF)/Erythroblas-IRF2-ChIP-Seq(GSE36985)/Homer	GAAASYGAAASY	1.31217	1.88976	1.44068	1.66667
STAT1(Stat)/HelaS3-STAT1-ChIP-Seq(GSE12782)/Homer	NATTTCCNGGAAAT	1.16039	1.36342	1.17212	1.3552
Reverb(NR/DR2)/BLRP(RAW)-Reverba-ChIP-Seq(GSE45914)/Homer	GTRGGTCASTGGGTCA	0.977622	1.23529	1.02115	1.1615
STAT5(Stat)/mCD4+-Stat5-ChIP-Seq(GSE12346)/Homer	RTTTCTNAGAAA	1.18194	1.30769	1.125	1.27827
Tbx20(T-box)/Heart-Tbx20-ChIP-Seq(GSE29636)/Homer	GGTGYTGACAGS	1.0682	1.17412	0.948113	1.07111
c-Myc/mES-cMyc-ChIP-Seq(GSE11431)/Homer	VVCCACGTGG	0.85174	0.915304	0.835359	0.943406
NFkB-p50,p52(RHD)/p50-ChIP-Chip(Schreiber et al.)/Homer	GGGGGAATCCCC	1.06759	1.22295	1.06053	1.1976
Pax7(Paired/Homeobox)/Myoblast-Pax7-ChIP-Seq(GSE25064)/Homer	TAATCAATTA	0.855908	1.02532	0.726994	0.82
CTCF(Zf)/CD4+-CTCF-ChIP-Seq(Barski et al.)/Homer	AYAGTGCCMYCTRGTGGCCA	2.10578	2.554	2.93829	3.2958
Ets1-distal(ETS)/CD4+-PolII-ChIP-Seq(Barski et al.)/Homer	MACAGGAAGT	1.18961	1.29987	1.20656	1.35043
PU.1(ETS)/ThioMac-PU.1-ChIP-Seq(GSE21512)/Homer	AGAGGAAGTG	1.09897	1.24621	1.11129	1.2379
HIF2a(HLH)/785_O-HIF2a-ChIP-Seq(GSE34871)/Homer	GCACGTACCC	1.02133	1.0177	1.01195	1.12572
Stat3(Stat)/mES-Stat3-ChIP-Seq(GSE11431)/Homer	CTTCCGGGAA	1.10989	1.24476	1.22868	1.36657
Elk4(ETS)/Hela-Elk4-ChIP-Seq(GSE31477)/Homer	NRYTTCCGGY	1.15969	1.24527	1.15603	1.28556
Pho4(bHLH)/Yeast-Pho4-ChIP-Seq(GSE29506)/Homer	AAGCACGTGBGD	0.98132	1.13413	1.04785	1.16181
ZNF143|STAF(Zf)/CUTLL-ZNF143-ChIP-Seq(GSE29600)/Homer	ATTTCCCAGVAKSCY	0.958312	1.06362	0.91386	1.01293
Pho2(bHLH)/Yeast-Pho2-ChIP-Seq(GSE29506)/Homer	CCCACGTGCT	0.857381	0.91529	0.821477	0.907289
Phox2a(Homeobox)/Neuron-Phox2a-ChIP-Seq(GSE31456)/Homer	YTAATYNRATTA	0.97879	1.00251	0.90082	0.987427
Oct2(POU/Homeobox)/Bcell-Oct2-ChIP-Seq(GSE21512)/Homer	ATATGCAAAT	0.939906	0.932886	0.898235	0.982234
Stat3+il21(Stat)/CD4-Stat3-ChIP-Seq(GSE19198)/Homer	SVYTTCCNGGAARB	1.08273	1.17092	1.13382	1.23671
VDR(NR/DR3)/GM10855-VDR+vitD-ChIP-Seq(GSE22484)/Homer	ARAGGTCANWGAGTTCANNN	1.04187	1.1693	0.996129	1.0842
EWS:FLI1-fusion(ETS)/SK_N_MC-EWS:FLI1-ChIP-Seq(SRA014231)/Homer	VACAGGAAAT	1.15824	1.22725	1.16498	1.26651
STAT4(Stat)/CD4-Stat4-ChIP-Seq(GSE22104)/Homer	NYTTCCWGGAAR	1.12734	1.20084	1.13419	1.22992
ETS(ETS)/Promoter/Homer	AACCGGAAGT	1.20427	1.33861	1.20631	1.30537
NFkB-p65(RHD)/GM12787-p65-ChIP-Seq(GSE19485)/Homer	WGGGGATTTCCC	1.13353	1.21946	1.20456	1.30268
CArG(MADS)/PUER-Srf-ChIP-Seq(Sullivan et al.)/Homer	CCATATATGGNM	1.09049	1.10357	1.08453	1.17186
Max(HLH)/K562-Max-ChIP-Seq(GSE31477)/Homer	RCCACGTGGYYN	0.87197	0.982818	0.869746	0.938653
PU.1-IRF(ETS:IRF)/Bcell-PU.1-ChIP-Seq(GSE21512)/Homer	MGGAAGTGAAAC	1.02303	1.07708	0.991315	1.0685
ELF5(ETS)/T47D-ELF5-ChIP-Seq(GSE30407)/Homer	ACVAGGAAGT	1.14892	1.26601	1.1933	1.28284
Unknown-ESC-element/mES-Nanog-ChIP-Seq(GSE11724)/Homer	CACAGCAGGGGG	1.07909	1.09027	1.06858	1.1481
GABPA(ETS)/Jurkat-GABPa-ChIP-Seq(GSE17954)/Homer	RACCGGAAGT	1.19158	1.25917	1.1527	1.23596
ZFX(Zf)/mES-Zfx-ChIP-Seq(GSE11431)/Homer	AGGCCTRG	1.0043	0.977839	0.970856	1.04095
EKLF(Zf)/Erythrocyte-Klf1-ChIP-Seq(GSE20478)/Homer	NWGGGTGTGGCY	1.36084	1.41904	1.41947	1.52179
GFY-Staf/Promoters/Homer	RACTACAATTCCCAGAAKGC	0.889381	0.745387	0.833333	0.892857
Elk1(ETS)/Hela-Elk1-ChIP-Seq(GSE31477)/Homer	HACTTCCGGY	1.17059	1.27008	1.21786	1.303
Fli1(ETS)/CD8-FLI-ChIP-Seq(GSE20898)/Homer	NRYTTCCGGH	1.12842	1.19459	1.12239	1.20061
RARg(NR)/ES-RARg-ChIP-Seq(GSE30538)/Homer	AGGTCAAGGTCA	0.410211	0.40625	0.392857	0.420091
Srebp2(HLH)/HepG2-Srebp2-ChIP-Seq(GSE31477)/Homer	CGGTCACSCCAC	1.06869	1.13056	1.06379	1.13218
Unknown(Homeobox)/Limb-p300-ChIP-Seq/Homer	SSCMATWAAA	1.13213	1.10622	1.22984	1.30413
BORIS(Zf)/K562-CTCFL-ChIP-Seq(GSE32465)/Homer	CNNBRGCGCCCCCTGSTGGC	1.75506	1.93931	2.24906	2.38101
ETS1(ETS)/Jurkat-ETS1-ChIP-Seq(GSE17954)/Homer	ACAGGAAGTG	1.12433	1.17156	1.12717	1.19237
NFY(CCAAT)/Promoter/Homer	RGCCAATSRG	0.986717	0.997468	0.955072	1.01
ETV1(ETS)/GIST48-ETV1-ChIP-Seq(GSE22441)/Homer	AACCGGAAGT	1.10313	1.15696	1.08435	1.1461
NF1(CTF)/LNCAP-NF1-ChIP-Seq(Unpublished)/Homer	CYTGGCABNSTGCCAR	1.38407	1.27078	1.37754	1.45495
ELF1(ETS)/Jurkat-ELF1-ChIP-Seq(SRA014231)/Homer	AVCCGGAAGT	1.20279	1.31996	1.23333	1.30203
Sp1(Zf)/Promoter/Homer	GGCCCCGCCCCC	1.37611	1.40896	1.49451	1.57544
TOD6?/SacCer-Promoters/Homer	GCGATGAGMT	1.05769	1.03672	1.09532	1.15217
Isl1(Homeobox)/Neuron-Isl1-ChIP-Seq(GSE31456)/Homer	CTAATKGV	1.04327	1.08073	1.0142	1.06574
X-box(HTH)/NPC-H3K4me1-ChIP-Seq(GSE16256)/Homer	GGTTGCCATGGCAA	1.3469	1.13067	1.21134	1.27208
NFAT:AP1/Jurkat-NFATC1-ChIP-Seq(Jolma et al.)/Homer	SARTGGAAAAWRTGAGTCAB	1.15057	1.24547	1.1194	1.17492
Unknown2/Drosophila-Promoters/Homer	CATCMCTA	1.00279	1.00774	0.972499	1.02062
Mef2a(MADS)/HL1-Mef2a.biotin-ChIP-Seq(GSE21529/Homer	CYAAAAATAG	1.13671	0.96785	1.13566	1.19154
Lhx2(Homeobox)/HFSC-Lhx2-ChIP-Seq(GSE48068)/Homer	TAATTAGN	1.06985	1.06905	1.0003	1.04274
STAT6/Macrophage-Stat6-ChIP-Seq(GSE38377)/Homer	TTCCKNAGAA	1.17806	1.17655	1.19064	1.24009
Rbpj1(?)/Panc1-Rbpj1-ChIP-Seq(GSE47459)/Homer	HTTTCCCASG	1.08332	1.09969	1.0712	1.11397
E2A-nearPU.1(HLH)/Bcell-PU.1-ChIP-Seq(GSE21512)/Homer	NVCACCTGBN	0.997213	1.01706	1.03107	1.0706
RUNX(Runt)/HPC7-Runx1-ChIP-Seq(GSE22178)/Homer	SAAACCACAG	1.02086	1.04018	1.04585	1.08419
FOXA1(Forkhead)/MCF7-FOXA1-ChIP-Seq(GSE26831)/Homer	WAAGTAAACA	1.01283	0.935932	1.06665	1.10573
Atoh1(bHLH)/Cerebellum-Atoh1-ChIP-Seq(GSE22111)/Homer	VNRVCAGCTGGY	1.0344	1.05953	1.05215	1.08884
PRDM14(Zf)/H1-PRDM14-ChIP-Seq(GSE22767)/Homer	RGGTCTCTAACY	0.990865	1.02704	1.05027	1.08683
SFP1/SacCer-Promoters/Homer	DDAAAAATTTTY	0.835821	0.6875	0.790614	0.817778
NeuroD1(bHLH)/Islet-NeuroD1-ChIP-Seq(GSE30298)/Homer	GCCATCTGTT	1.04829	1.06823	1.08624	1.12336
Tal1	CATCTG	0.985297	0.992802	0.990562	1.02438
Znf263(Zf)/K562-Znf263-ChIP-Seq(GSE31477)/Homer	CVGTSCTCCC	1.00755	1.00965	0.994385	1.0281
FOXA1:AR/LNCAP-AR-ChIP-Seq(GSE27824)/Homer	AGTAAACAAAAAAGAACAND	0.536193	0.543767	0.6625	0.683636
EHF(ETS)/LoVo-EHF-ChIP-Seq(GSE49402)/Homer	AVCAGGAAGT	1.12	1.18747	1.14338	1.17924
NFAT(RHD)/Jurkat-NFATC1-ChIP-Seq(Jolma et al.)/Homer	ATTTTCCATT	1.09326	1.06574	1.05781	1.09078
FOXA1(Forkhead)/LNCAP-FOXA1-ChIP-Seq(GSE27824)/Homer	WAAGTAAACA	1.03361	0.9483	1.06459	1.09641
RUNX2(Runt)/PCa-RUNX2-ChIP-Seq(GSE33889)/Homer	NWAACCACADNN	0.993017	0.984292	0.99396	1.02239
PAX5-shortForm(Paired/Homeobox)/GM12878-PAX5-ChIP-Seq(GSE32465)/Homer	GTCACGCTCSCTGM	1.08214	1.15495	1.10243	1.13382
EBF(EBF)/proBcell-EBF-ChIP-Seq(GSE21978)/Homer	DGTCCCYRGGGA	1.19683	1.26102	1.28202	1.31846
SPDEF(ETS)/VCaP-SPDEF-ChIP-Seq(SRA014231)/Homer	ASWTCCTGBT	1.09862	1.07797	1.1087	1.13862
EGL-5(Homeobox)/cElegans-L3-EGL5-ChIP-Seq(modEncode)/Homer	ATTTAATGGG	0.99657	1.00713	1.0248	1.05185
RUNX-AML(Runt)/CD4+-PolII-ChIP-Seq(Barski et al.)/Homer	GCTGTGGTTW	1.04842	1.0457	1.06912	1.09705
ZNF711(Zf)/SH-SY5Y-ZNF711-ChIP-Seq(GSE20673)/Homer	AGGCCTAG	0.995451	0.973521	0.976453	1.00154
RUNX1(Runt)/Jurkat-RUNX1-ChIP-Seq(GSE29180)/Homer	AAACCACARM	1.01079	1.0232	1.01669	1.0426
PRDM1/BMI1(Zf)/Hela-PRDM1-ChIP-Seq(GSE31477)/Homer	ACTTTCACTTTC	0.994922	1.00786	0.948767	0.972433
EWS:ERG-fusion(ETS)/CADO_ES1-EWS:ERG-ChIP-Seq(SRA014231)/Homer	ATTTCCTGTN	1.20618	1.2506	1.22145	1.25153
GAGA-repeat/Arabidopsis-Promoters/Homer	CTCTCTCTCY	0.9286	0.947146	0.942072	0.964856
Nkx2.5(Homeobox)/HL1-Nkx2.5.biotin-ChIP-Seq(GSE21529)/Homer	RRSCACTYAA	0.996306	1.00977	0.99014	1.01387
n-Myc(HLH)/mES-nMyc-ChIP-Seq(GSE11431)/Homer	VRCCACGTGG	0.913405	0.953883	0.92718	0.948506
BMYB(HTH)/Hela-BMYB-ChIPSeq(GSE27030)/Homer	NHAACBGYYV	1.09457	1.10581	1.10937	1.13432
Mef2c(MADS)/GM12878-Mef2c-ChIP-Seq(GSE32465)/Homer	DCYAAAAATAGM	1.0501	0.975393	1.06551	1.08934
ERG(ETS)/VCaP-ERG-ChIP-Seq(GSE14097)/Homer	ACAGGAAGTG	1.10553	1.16085	1.13363	1.15835
Arnt:Ahr(bHLH)/MCF7-Arnt-ChIP-Seq(Lo et al.)/Homer	TBGCACGCAA	0.943436	1.00121	0.978261	0.999518
HNF6(Homeobox)/Liver-Hnf6-ChIP-Seq(ERP000394)/Homer	NTATYGATCH	1.02099	1.04508	1.11747	1.14175
Ptf1a(HLH)/Panc1-Ptf1a-ChIP-Seq(GSE47459)/Homer	ACAGCTGTTN	1.00597	1.02745	1.02897	1.05088
Fox:Ebox(Forkhead:HLH)/Panc1-Foxa2-ChIP-Seq(GSE47459)/Homer	NNNVCTGWGYAAACASN	1.08348	1.05335	1.16905	1.19346
Tbet(T-box)/CD8-Tbet-ChIP-Seq(GSE33802)/Homer	AGGTGTGAAM	1.13691	1.12012	1.08842	1.11
MafA(bZIP)/Islet-MafA-ChIP-Seq(GSE30298)/Homer	TGCTGACTCA	1.0522	1.02802	1.03983	1.06041
caudal(Homeobox)/Drosophila-Embryos-ChIP-Chip(modEncode)/Homer	GGYCATAAAW	1.18529	1.16703	1.33762	1.36397
bZIP:IRF/Th17-BatF-ChIP-Seq(GSE39756)/Homer	NAGTTTCABTHTGACTNW	0.943277	0.998921	0.918475	0.93613
SEP3(MADS)/Arabidoposis-Flower-Sep3-ChIP-Seq/Homer	CCAAAAAGGG	0.932533	0.912437	0.925809	0.94335
Tlx?(NR)/NPC-H3K4me1-ChIP-Seq(GSE16256)/Homer	CTGGCAGSCTGCCA	1.1725	1.11111	1.2092	1.2317
Bach1(bZIP)/K562-Bach1-ChIP-Seq(GSE31477)/Homer	AWWNTGCTGAGTCAT	1.41667	1.37805	1.4593	1.48619
Bcl6(Zf)/Liver-Bcl6-ChIP-Seq(GSE31578)/Homer	NNNCTTTCCAGGAAA	1.03537	1.07023	1.04506	1.06243
E2A(HLH)/proBcell-E2A-ChIP-Seq(GSE21978)/Homer	DNRCAGCTGY	1.03653	1.04684	1.0734	1.09059
GATA3(Zf)/iTreg-Gata3-ChIP-Seq(GSE20898)/Homer	AGATAASR	1.12555	1.1158	1.09534	1.11227
Eomes(T-box)/H9-Eomes-ChIP-Seq(GSE26097)/Homer	ATTAACACCT	1.08724	1.07284	1.0499	1.06421
MyoD(HLH)/Myotube-MyoD-ChIP-Seq(GSE21614)/Homer	RRCAGCTGYTSY	1.0651	1.06549	1.05982	1.07399
GLI3(Zf)/GLI3-ChIP-Chip(GSE11077)/Homer	CGTGGGTGGTCC	1.01917	0.884038	0.923977	0.935691
Chop(bZIP)/MEF-Chop-ChIP-Seq(GSE35681)/Homer	ATTGCATCAT	1.17139	1.17411	1.20773	1.22242
E2F6(E2F)/Hela-E2F6-ChIP-Seq(GSE31477)/Homer	GGCGGGAARN	1.10671	1.09511	1.19413	1.20757
CEBP(bZIP)/CEBPb-ChIP-Seq(GSE21512)/Homer	ATTGCGCAAC	1.18216	1.09334	1.14183	1.15355
Klf4(Zf)/mES-Klf4-ChIP-Seq(GSE11431)/Homer	GCCACACCCA	1.25297	1.3298	1.36288	1.37574
SeqBias: GA-repeat	GAGAGAGAGA	1.00832	1.00662	1.00928	1.01871
p63(p53)/Keratinocyte-p63-ChIP-Seq(GSE17611)/Homer	NNDRCATGYCYNRRCATGYH	0.95	1.03036	1.00229	1.0113
Smad4(MAD)/ESC-SMAD4-ChIP-Seq(GSE29422)/Homer	VBSYGTCTGG	1.0095	1.02157	1.03691	1.04618
DPL-1(E2F)/cElegans-Adult-ChIP-Seq(modEncode)/Homer	TAGCGCGC	1.04133	1.03079	1.02879	1.03743
Egr1(Zf)/K562-Egr1-ChIP-Seq(GSE32465)/Homer	TGCGTGGGYG	0.948369	0.982747	0.95762	0.964598
SeqBias: CA-repeat	CACACACACA	0.990287	0.996491	0.992517	0.999307
FOXP1(Forkhead)/H9-FOXP1-ChIP-Seq(GSE31006)/Homer	NYYTGTTTACHN	1.18435	1.04862	1.14675	1.15346
Lhx3(Homeobox)/Neuron-Lhx3-ChIP-Seq(GSE31456)/Homer	ADBTAATTAR	1.05766	1.05737	1.01828	1.02407
CES-1(Homeobox)/cElegans-L1-CES1-ChIP-Seq(modEncode)/Homer	AAATTSAATTTN	0.987086	0.974108	0.972797	0.978216
Tcf12(HLH)/GM12878-Tcf12-ChIP-Seq(GSE32465)/Homer	VCAGCTGYTG	1.09169	1.08171	1.12091	1.12713
HOXA9(Homeobox)/HSC-Hoxa9-ChIP-Seq(GSE33509)/Homer	GGCCATAAATCA	1.15616	1.19721	1.20597	1.21088
Foxa2(Forkhead)/Liver-Foxa2-ChIP-Seq(GSE25694)/Homer	CYTGTTTACWYW	1.15364	1.07263	1.19737	1.20119
Ap4(HLH)/AML-Tfap4-ChIP-Seq(GSE45738)/Homer	NAHCAGCTGD	1.0265	1.05651	1.04663	1.04949
Nkx2.1(Homeobox)/LungAC-Nkx2.1-ChIP-Seq(GSE43252)/Homer	RSCACTYRAG	0.988488	1.00517	0.994781	0.997412
SeqBias: GCW-triplet	GCWGCWGCWGCW	1.00294	1.00101	1.00283	1.00508
Myf5(bHLH)/GM-Myf5-ChIP-Seq(GSE24852)/Homer	BAACAGCTGT	1.07583	1.06391	1.14128	1.14364
SeqBias: polyA-repeat	AAAAAAAAAA	1.00191	1.00101	1.00201	1.00395
PR(NR)/T47D-PR-ChIP-Seq(GSE31130)/Homer	VAGRACAKNCTGTBC	1.00834	1.0175	1.00667	1.00856
Ik-1	NHTTGGGAATRCC	1.001	1.0009	1.0006	1.00222
Hnf1(Homeobox)/Liver-Foxa2-Chip-Seq(GSE25694)/Homer	GGTTAAWCATTAA	1.68354	1.28478	1.56433	1.56647
SeqBias: CG-repeat	CGCGCGCGCG	0.994663	0.999322	1.02742	1.02795
NF1-halfsite(CTF)/LNCaP-NF1-ChIP-Seq(Unpublished)/Homer	YTGCCAAG	1.07916	1.06619	1.11245	1.11293
SeqBias: C/A-bias	MMMMMMMMMM	1.00273	1.00272	1.00272	1.00264
SeqBias: G/A bias	RRRRRRRRRR	1.00192	1.00131	1.00262	1.00253
Rfx5(HTH)/GM12878-Rfx5-ChIP-Seq(GSE31477)/Homer	SCCTAGCAACAG	0.965848	0.908519	0.955143	0.954982
Tbx5(T-box)/HL1-Tbx5.biotin-ChIP-Seq(GSE21529)/Homer	AGGTGTCA	1.04597	1.04224	1.06582	1.06559
AP-2gamma(AP2)/MCF7-TFAP2C-ChIP-Seq(GSE21234)/Homer	SCCTSAGGSCAW	1.0706	1.03487	1.07856	1.07807
HOXD13(Homeobox)/Chicken-Hoxd13-ChIP-Seq(GSE38910)/Homer	NCYAATAAAA	1.04089	1.00903	1.14165	1.14033
SeqBias: polyC-repeat	CCCCCCCCCC	1.0041	1.00274	1.00317	1.00184
SCL(HLH)/HPC7-Scl-ChIP-Seq(GSE13511)/Homer	AVCAGCTG	1.01721	1.01578	1.03152	1.02991
MyoG(HLH)/C2C12-MyoG-ChIP-Seq(GSE36024)/Homer	AACAGCTG	1.05584	1.09064	1.09493	1.09306
GATA-DR8(Zf)/iTreg-Gata3-ChIP-Seq(GSE20898)/Homer	AGATSTNDNNDSAGATAASN	0.84715	0.636782	0.726994	0.725664
Atf4(bZIP)/MEF-Atf4-ChIP-Seq(GSE35681)/Homer	MTGATGCAAT	1.2184	1.18235	1.19584	1.1935
SeqBias: A/T bias	WWWWWWWWWW	1.00451	1.00266	1.00679	1.00456
TR4(NR/DR1)/Hela-TR4-ChIP-Seq(GSE24685)/Homer	GAGGTCAAAGGTCA	1.48255	1.36273	1.42706	1.42389
CEBP:AP1(bZIP)/ThioMac-CEBPb-ChIP-Seq(GSE21512)/Homer	DRTGTTGCAA	1.13151	1.11732	1.1814	1.17861
CRX(Homeobox)/Retina-Crx-ChIP-Seq(GSE20012)/Homer	GCTAATCC	1.00532	0.986491	1.01986	1.01705
ETS:RUNX/Jurkat-RUNX1-ChIP-Seq(GSE17954)/Homer	RCAGGATGTGGT	1.15439	1.369	1.39818	1.39286
AMYB(HTH)/Testes-AMYB-ChIP-Seq(GSE44588)/Homer	TGGCAGTTGG	1.07569	1.06486	1.09196	1.08665
Initiator/Drosophila-Promoters/Homer	NTCAGTYG	1.02866	1.04718	1.05407	1.04868
Olig2(bHLH)/Neuron-Olig2-ChIP-Seq(GSE30882)/Homer	RCCATMTGTT	1.01803	1.0161	1.02329	1.01806
Foxo1(Forkhead)/RAW-Foxo1-ChIP-Seq(Fan et al.)/Homer	CTGTTTAC	1.07291	1.08169	1.10708	1.10139
Srebp1a(HLH)/HepG2-Srebp1a-ChIP-Seq(GSE31477)/Homer	RTCACSCCAY	1.05348	1.06449	1.19018	1.18265
SeqBias: CG bias	SSSSSSSSSS	1.00413	1.01702	1.02126	1.01401
Oct4(POU/Homeobox)/mES-Oct4-ChIP-Seq(GSE11431)/Homer	ATTTGCATAW	0.985557	0.967411	0.975484	0.968162
Pitx1(Homeobox)/Chicken-Pitx1-ChIP-Seq(GSE38910)/Homer	TAATCCCN	1.00503	0.991856	1.01295	1.00478
Pdx1(Homeobox)/Islet-Pdx1-ChIP-Seq(SRA008281)/Homer	YCATYAATCA	1.05507	1.07026	1.04241	1.03387
HIF-1a(HLH)/MCF7-HIF1a-ChIP-Seq(GSE28352)/Homer	TACGTGCV	0.929748	0.980632	1.03591	1.02713
GAGA-repeat/SacCer-Promoters/Homer	CTYTCTYTCTCTCTC	0.995575	0.995224	1.00971	0.998148
SUT1?/SacCer-Promoters/Homer	CCCCGCGC	1.00913	1.03327	1.02828	1.0163
PHA-4(Forkhead)/cElegans-Embryos-PHA4-ChIP-Seq(modEncode)/Homer	KTGTTTGC	0.99009	0.99696	1.01397	1.00155
Smad2(MAD)/ES-SMAD2-ChIP-Seq(GSE29422)/Homer	CTGTCTGG	1.0047	1.00343	1.04998	1.0369
E2F4(E2F)/K562-E2F4-ChIP-Seq(GSE31477)/Homer	GGCGGGAAAH	1.13282	1.22247	1.29455	1.27824
TATA-box/SacCer-Promoters/Homer	BBHWTATATA	0.769447	0.745176	0.855612	0.844817
PRDM9(Zf)/Testis-DMC1-ChIP-Seq(GSE35498)/Homer	ADGGYAGYAGCATCT	1.02438	1.01281	0.985695	0.972833
EBF1(EBF)/Near-E2A-ChIP-Seq(GSE21512)/Homer	GTCCCCWGGGGA	1.06047	1.03124	1.08887	1.07429
TEAD4(TEA)/Tropoblast-Tead4-ChIP-Seq(GSE37350)/Homer	CCWGGAATGY	1.07462	1.03172	1.09289	1.07777
IRF4(IRF)/GM12878-IRF4-ChIP-Seq(GSE32465)/Homer	ACTGAAACCA	1.06911	1.10688	1.1281	1.11235
AR-halfsite(NR)/LNCaP-AR-ChIP-Seq(GSE27824)/Homer	CCAGGAACAG	1.02598	1.00897	1.0234	1.00838
MYB(HTH)/ERMYB-Myb-ChIPSeq(GSE22095)/Homer	GGCVGTTR	1.05313	1.04266	1.06245	1.0457
Nkx6.1(Homeobox)/Islet-Nkx6.1-ChIP-Seq(GSE40975)/Homer	GKTAATGR	1.04955	1.05244	1.03619	1.01983
PIF5ox(bHLH)/Arabidopsis-PIF5ox-ChIP-Seq(GSE35062)/Homer	BCACGTGVDN	0.967626	0.972074	0.987296	0.970845
GRHL2(CP2)/HBE-GRHL2-ChIP-Seq(GSE46194)/Homer	AAACYKGTTWDACMRGTTTB	0.994624	1.05549	1.14264	1.1236
OCT4-SOX2-TCF-NANOG((POU/Homeobox/HMG)/mES-Oct4-ChIP-Seq(GSE11431)/Homer	ATTTGCATAACAATG	0.822581	0.721068	0.8	0.786575
HRE(HSF)/HepG2-HSF1-ChIP-Seq(GSE31477)/Homer	BSTTCTRGAABVTTCYAGAA	1.06368	1.21833	1.13609	1.11688
E-box/Arabidopsis-Promoters/Homer	GCCACGTG	1.0221	1.11019	1.08949	1.07079
FXR(NR/IR1)/Liver-FXR-ChIP-Seq(Chong et al.)/Homer	AGGTCANTGACCTB	1.10268	1.13717	1.11502	1.0956
SeqBias: TA-repeat	TATATATATA	0.968467	0.940228	0.958567	0.941423
Nanog(Homeobox)/mES-Nanog-ChIP-Seq(GSE11724)/Homer	RGCCATTAAC	1.02425	1.00897	1.02685	1.00773
RLR1?/SacCer-Promoters/Homer	WTTTTCYYTTTT	0.734414	0.710327	0.783613	0.768128
Rfx1(HTH)/NPC-H3K4me1-ChIP-Seq(GSE16256)/Homer	KGTTGCCATGGCAA	1.11796	0.926876	1.15702	1.12941
Unknown5/Drosophila-Promoters/Homer	GCTGATAASV	1.15028	1.1481	1.06881	1.04305
Hoxc9(Homeobox)/Ainv15-Hoxc9-ChIP-Seq(GSE21812)/Homer	GGCCATAAATCA	1.12427	1.11588	1.18063	1.15116
CHR/Cell-Cycle-Exp/Homer	SRGTTTCAAA	1.11147	1.09765	1.14793	1.11706
Erra(NR)/HepG2-Erra-ChIP-Seq(GSE31477)/Homer	CAAAGGTCAG	1.08136	1.05056	1.05853	1.02946
CLOCK(HLH)/Liver-Clock-ChIP-Seq(GSE39860)/Homer	GHCACGTG	1.02204	1.1148	1.0462	1.01741
BATF(bZIP)/Th17-BATF-ChIP-Seq(GSE39756)/Homer	DATGASTCAT	1.38395	1.39529	1.37342	1.33534
BMAL1(HLH)/Liver-Bmal1-ChIP-Seq(GSE39860)/Homer	GNCACGTG	0.971771	0.993117	0.984967	0.956454
HLH-1(bHLH)/cElegans-Embryo-HLH1-ChIP-Seq(modEncode)/Homer	RACAGCTGTTBH	1.07199	1.05859	1.12392	1.09081
GATA:SCL/Ter119-SCL-ChIP-Seq(GSE18720)/Homer	CRGCTGBNGNSNNSAGATAA	1.23944	1.1134	1.1167	1.08266
Tcfcp2l1(CP2)/mES-Tcfcp2l1-ChIP-Seq(GSE11431)/Homer	NRAACCRGTTYRAACCRGYT	1.06789	1.17225	1.13118	1.09648
AP-2alpha(AP2)/Hela-AP2alpha-ChIP-Seq(GSE31477)/Homer	ATGCCCTGAGGC	1.0627	1.03214	1.08793	1.05404
NPAS2(HLH)/Liver-NPAS2-ChIP-Seq(GSE39860)/Homer	KCCACGTGAC	0.994093	0.975808	1.02658	0.994528
FHY3(FAR1)/Arabidopsis-FHY3-ChIP-Seq(GSE30711)/Homer	HHCACGCGCBTN	1.0107	1.05742	1.07174	1.03801
p53(p53)/Saos-p53-ChIP-Seq(GSE15780)/Homer	RRCATGYCYRGRCATGYYYN	0.836364	0.804348	0.943089	0.913265
p53(p53)/Saos-p53-ChIP-Seq/Homer	RRCATGYCYRGRCATGYYYN	0.836364	0.804348	0.943089	0.913265
GATA-IR3(Zf)/iTreg-Gata3-ChIP-Seq(GSE20898)/Homer	NNNNNBAGATAWYATCTVHN	0.97099	1.0273	1.05022	1.01556
Unknown4/Arabidopsis-Promoters/Homer	CKTCKTCTTY	0.929955	0.944134	0.963274	0.931341
LIN-39(Homeobox)/cElegans.L3-LIN39-ChIP-Seq(modEncode)/Homer	ATGATTRATG	0.985264	1.00406	0.980414	0.947402
TEAD(TEA)/Fibroblast-PU.1-ChIP-Seq(Unpublished)/Homer	YCWGGAATGY	1.09494	1.10487	1.16445	1.125
PPARE(NR/DR1)/3T3L1-Pparg-ChIP-Seq(GSE13511)/Homer	TGACCTTTGCCCCA	1.20707	1.13856	1.15086	1.11076
Maz(Zf)/HepG2-Maz-ChIP-Seq(GSE31477)/Homer	GGGGGGGG	1.02359	1.05274	1.08259	1.04371
Smad3(MAD)/NPC-Smad3-ChIP-Seq(GSE36673)/Homer	TWGTCTGV	1.01088	1.01709	1.02788	0.99062
Unknown6/Drosophila-Promoters/Homer	AATTTTAAAA	0.949015	0.892092	0.97156	0.935836
Nkx3.1(Homeobox)/LNCaP-Nkx3.1-ChIP-Seq(GSE28264)/Homer	AAGCACTTAA	1.00076	1.00542	1.02108	0.982887
AARE(HLH)/mES-cMyc-ChIP-Seq/Homer	GATTGCATCA	1.16783	1.25391	1.27969	1.23144
STAT6(Stat)/CD4-Stat6-ChIP-Seq(GSE22104)/Homer	ABTTCYYRRGAA	1.16683	1.19055	1.24236	1.19465
Egr2/Thymocytes-Egr2-ChIP-Seq(GSE34254)/Homer	NGCGTGGGCGGR	0.998733	1.06015	1.13428	1.08555
KLF5(Zf)/LoVo-KLF5-ChIP-Seq(GSE49402)/Homer	DGGGYGKGGC	1.12523	1.12591	1.22237	1.16915
NF-E2(bZIP)/K562-NFE2-ChIP-Seq(GSE31477)/Homer	GATGACTCAGCA	1.29804	1.50549	1.5266	1.45918
Atf1(bZIP)/K562-ATF1-ChIP-Seq(GSE31477)/Homer	GATGACGTCA	1.09141	1.12773	1.09207	1.04343
c-Myc(HLH)/LNCAP-cMyc-ChIP-Seq(unpublished)/Homer	VCCACGTG	1.02247	1.13744	1.08998	1.03844
TATA-Box(TBP)/Promoter/Homer	CCTTTTAWAGSC	1.03534	1.02896	1.0949	1.04277
Gata4(Zf)/Heart-Gata4-ChIP-Seq(GSE35151)/Homer	NBWGATAAGR	1.1982	1.16006	1.19199	1.13489
Gata2(Zf)/K562-GATA2-ChIP-Seq(GSE18829)/Homer	BBCTTATCTS	1.29261	1.22673	1.262	1.20104
RXR(NR/DR1)/3T3L1-RXR-ChIP-Seq(GSE13511)/Homer	TAGGGCAAAGGTCA	1.19506	1.1037	1.14274	1.08667
Pax8(Paired/Homeobox)/Thyroid-Pax8-ChIP-Seq(GSE26938)/Homer	GTCATGCHTGRCTGS	0.980037	0.991487	1.01978	0.968515
AP-1(bZIP)/ThioMac-PU.1-ChIP-Seq(GSE21512)/Homer	VTGACTCATC	1.36757	1.35771	1.34537	1.27333
Bach2(bZIP)/OCILy7-Bach2-ChIP-Seq(GSE44420)/Homer	TGCTGAGTCA	1.5	1.31051	1.58923	1.50315
CRE(bZIP)/Promoter/Homer	CSGTGACGTCAC	1.23133	1.2091	1.13756	1.07582
Sox3(HMG)/NPC-Sox3-ChIP-Seq(GSE33059)/Homer	CCWTTGTY	1.05607	1.02587	1.09431	1.03321
MafK(bZIP)/C2C12-MafK-ChIP-Seq(GSE36030)/Homer	GCTGASTCAGCA	1.07276	1.03938	1.01371	0.955285
Sox6(HMG)/Myotubes-Sox6-ChIP-Seq(GSE32627)/Homer	CCATTGTTNY	1.06373	1.01541	1.08321	1.01929
RBPJ:Ebox/Panc1-Rbpj1-ChIP-Seq(GSE47459)/Homer	GGGRAARRGRMCAGMTG	1.05958	1.00118	1.00988	0.950207
Nr5a2(NR)/mES-Nr5a2-ChIP-Seq(GSE19019)/Homer	BTCAAGGTCA	0.969675	0.911375	0.973587	0.915517
Gfi1b(Zf)/HPC7-Gfi1b-ChIP-Seq(GSE22178)/Homer	MAATCACTGC	1.0502	1.02977	1.11385	1.03794
Usf2(HLH)/C2C12-Usf2-ChIP-Seq(GSE36030)/Homer	GTCACGTGGT	1.15701	1.22394	1.13632	1.05846
Atf3(bZIP)/GBM-ATF3-ChIP-Seq(GSE33912)/Homer	DATGASTCATHN	1.41905	1.37733	1.42725	1.32681
Gata1(Zf)/K562-GATA1-ChIP-Seq(GSE18829)/Homer	SAGATAAGRV	1.3207	1.27044	1.29795	1.20559
Unknown1(NR/Ini-like)/Drosophila-Promoters/Homer	MYGGTCACACTG	1.18441	1.23299	1.17368	1.08791
PCF/Arabidopsis-Promoters/Homer	NNWWWTGGGCYTDDN	0.960659	0.877375	0.977881	0.906398
PAX5(Paired/Homeobox)/GM12878-PAX5-ChIP-Seq(GSE32465)/Homer	GCAGCCAAGCRTGACH	1.01995	0.921009	1.01427	0.938124
ERE(NR/IR3)/MCF7-ERa-ChIP-Seq(Unpublished)/Homer	VAGGTCACNSTGACC	0.991241	0.969429	0.963327	0.890777
NRF1/Promoter/Homer	STGCGCATGCGC	0.885671	0.860169	0.869141	0.802559
Nur77(NR)/K562-NR4A1-ChIP-Seq(GSE31363)/Homer	TGACCTTTNCNT	1.48753	1.33292	1.42202	1.31173
LXRE(NR/DR4)/BLRP(RAW)-LXRb-ChIP-Seq(GSE21512)/Homer	RGGTTACTANAGGTCA	1.2616	1.17407	1.13661	1.04688
Esrrb(NR)/mES-Esrrb-ChIP-Seq(GSE11431)/Homer	KTGACCTTGA	1.10886	1.05405	1.12562	1.03443
USF1(HLH)/GM12878-Usf1-ChIP-Seq(GSE32465)/Homer	SGTCACGTGR	1.06436	1.11295	1.12949	1.03581
PAX3:FKHR-fusion(Paired/Homeobox)/Rh4-PAX3:FKHR-ChIP-Seq(GSE19063)/Homer	ACCRTGACTAATTNN	0.988701	1.00708	0.956464	0.876967
HRE(HSF)/Striatum-HSF1-ChIP-Seq(GSE38000)/Homer	TTCTAGAABNTTCTA	1.13917	1.20612	1.25432	1.146
Hoxb4(Homeobox)/ES-Hoxb4-ChIP-Seq(GSE34014)/Homer	TGATTRATGGCY	1.04716	1.04831	1.0015	0.912577
Cdx2(Homeobox)/mES-Cdx2-ChIP-Seq(GSE14586)/Homer	GYMATAAAAH	1.13495	1.10139	1.32243	1.20456
Nrf2(bZIP)/Lymphoblast-Nrf2-ChIP-Seq(GSE37589)/Homer	HTGCTGAGTCAT	1.21028	1.31739	1.59873	1.45562
CEBP:CEBP(bZIP)/MEF-Chop-ChIP-Seq(GSE35681)/Homer	NTNATGCAAYMNNHTGMAAY	1.10458	1.11677	1.31566	1.1974
E-box/Drosophila-Promoters/Homer	AACAGCTGTTHN	1.14485	1.06414	1.29418	1.17696
Tcf3(HMG)/mES-Tcf3-ChIP-Seq(GSE11724)/Homer	ASWTCAAAGG	1.09	1.09046	1.07933	0.97665
Nr5a2(NR)/Pancreas-LRH1-ChIP-Seq(GSE34295)/Homer	BTCAAGGTCA	0.974282	0.932122	1.01639	0.917983
ARE(NR)/LNCAP-AR-ChIP-Seq(GSE27824)/Homer	RGRACASNSTGTYCYB	0.894847	0.916371	0.983395	0.882459
ETS:E-box/HPC7-Scl-ChIP-Seq(GSE22178)/Homer	AGGAARCAGCTG	1.17914	1.00994	1.27273	1.13687
Tcf4(HMG)/Hct116-Tcf4-ChIP-Seq(SRA012054)/Homer	ASATCAAAGGVA	1.10015	1.03998	1.13447	1.01335
HOXA2(Homeobox)/mES-Hoxa2-ChIP-Seq(Donaldson et al.)/Homer	GYCATCMATCAT	0.857759	0.880753	1.05655	0.941176
Tbox:Smad/ESCd5-Smad2_3-ChIP-Seq(GSE29422)/Homer	AGGTGHCAGACA	1.13819	1.15039	1.16555	1.0344
Six1(Homeobox)/Myoblast-Six1-ChIP-Chip(GSE20150)/Homer	GKVTCADRTTWC	1.07317	1.07057	1.11806	0.990676
Jun-AP1(bZIP)/K562-cJun-ChIP-Seq(GSE31477)/Homer	GATGASTCATCN	1.69214	1.59657	1.66808	1.47625
GRE/RAW264.7-GRE-ChIP-Seq(Unpublished)/Homer	VAGRACAKWCTGTYC	1.04022	1.06704	1.18072	1.04434
PBX1(Homeobox)/MCF7-PBX1-ChIP-Seq(GSE28007)/Homer	GSCTGTCACTCA	1.18078	1.10883	1.13437	1.00252
MafF(bZIP)/HepG2-MafF-ChIP-Seq(GSE31477)/Homer	HWWGTCAGCAWWTTT	1.09082	0.97009	1.12023	0.985
Sox2(HMG)/mES-Sox2-ChIP-Seq(GSE11431)/Homer	BCCATTGTTC	1.08259	1.02273	1.16022	1.02012
Pbx3(Homeobox)/GM12878-PBX3-ChIP-Seq(GSE32465)/Homer	SCTGTCAMTCAN	1.16246	1.06564	1.16052	1.01848
TRa(NR)/C17.2-TRa-ChIP-Seq(GSE38347)/Homer	GGTCANYTGAGGWCA	1.06911	1.10619	1.20982	1.06029
ELT-3(Gata)/cElegans-L1-ELT3-ChIP-Seq(modEncode)/Homer	AWTGATAAGA	1.17528	1.15908	1.19945	1.04833
Foxh1(Forkhead)/hESC-FOXH1-ChIP-Seq(GSE29422)/Homer	NNTGTGGATTSS	1.0637	0.994885	1.18991	1.03885
GRE(NR/IR3)/A549-GR-ChIP-Seq(GSE32465)/Homer	NRGVACABNVTGTYCY	1.01555	1.04409	1.25495	1.09395
c-Jun-CRE(bZIP)/K562-cJun-ChIP-Seq(GSE31477)/Homer	ATGACGTCATCY	1.19567	1.15537	1.25027	1.08805
bHLHE40(HLH)/HepG2-BHLHE40-ChIP-Seq(GSE31477)/Homer	KCACGTGMCN	1	1.03315	1.11678	0.967801
Cbf1(bHLH)/Yeast-Cbf1-ChIP-Seq(GSE29506)/Homer	TCACGTGAYH	1.0881	1.18349	1.10686	0.953177
HNF4a(NR/DR1)/HepG2-HNF4a-ChIP-Seq(GSE25021)/Homer	CARRGKBCAAAGTYCA	1.57344	1.28921	1.54509	1.32865
ABF1/SacCer-Promoters/Homer	CGTRNAAARTGA	1.04704	0.990476	1.20817	1.0327
PQM-1(?)/cElegans-L3-ChIP-Seq(modEncode)/Homer	ACTGATAAGA	1.26787	1.2896	1.31844	1.12676
GATA-IR4(Zf)/iTreg-Gata3-ChIP-Seq(GSE20898)/Homer	NAGATWNBNATCTNN	1.27875	1.12088	1.31481	1.12335
JunD(bZIP)/K562-JunD-ChIP-Seq/Homer	ATGACGTCATCN	1.21547	1.23315	1.53165	1.28302
NRF1(NRF)/MCF7-NRF1-ChIP-Seq(Unpublished)/Homer	CTGCGCATGCGC	0.976923	0.875274	1.03859	0.853372
YY1(Zf)/Promoter/Homer	CAAGATGGCGGC	0.579412	0.692529	0.711462	0.564626
TCFL2(HMG)/K562-TCF7L2-ChIP-Seq(GSE29196)/Homer	ACWTCAAAGG	1.27649	1.10515	1.26481	0.993569
GFY(?)/Promoter/Homer	ACTACAATTCCC	1.18382	1.14239	1.35714	1.06608
TATA-box/Drosophila-Promoters/Homer	CTATAAAAGCSV	0.899408	0.757925	1.15772	0.885417
E-box(HLH)/Promoter/Homer	SSGGTCACGTGA	1.28866	1.28383	1.32618	1.0121
GATA-DR4(Zf)/iTreg-Gata3-ChIP-Seq(GSE20898)/Homer	AGATGKDGAGATAAG	1.08798	0.897638	0.976744	0.733096
E2F(E2F)/Cell-Cycle-Exp/Homer	TTSGCGCGAAAA	1.20886	1.125	1.7	1.25926
Unknown4/Drosophila-Promoters/Homer	AAAAATACCRMA	1.15892	1.11732	1.22812	0.845201
Oct4:Sox17/F9-Sox17-ChIP-Seq(GSE44553)/Homer	CCATTGTATGCAAAT	1.10672	1.03985	1.52022	0.992167
Pax7-longest(Paired/Homeobox)/Myoblast-Pax7-ChIP-Seq(GSE25064)/Homer	NTAATTDGCYAATTANNWWD	0.673267	0.716049	0.619565	0.777778
EFL-1(E2F)/cElegans-L1-EFL1-ChIP-Seq(modEncode)/Homer	TGCAARYGCGCTCYA	1.11594	0.813333	0.980392	1.31034
GFX(?)/Promoter/Homer	ATTCTCGCGAGA	1	2.38889	1.31579	1.63636
REST-NRSF(Zf)/Jurkat-NRSF-ChIP-Seq/Homer	GGMGCTGTCCATGGTGCTGA	1.23529	1.2	1.23684	1.56522
ZBTB33(Zf)/GM12878-ZBTB33-ChIP-Seq(GSE32465)/Homer	GGVTCTCGCGAGAAC	1.25676	1.625	1.24359	1.04444
EBNA1(EBV virus)/Raji-EBNA1-ChIP-Seq(GSE30709)/Homer	GGYAGCAYDTGCTDCCCNNN	1.10976	1.22078	1.25	1.19718
p53(p53)/mES-cMyc-ChIP-Seq(GSE11431)/Homer	ACATGCCCGGGCAT	1.0122	1.25843	1.25397	1.15152
Pax7-long(Paired/Homeobox)/Myoblast-Pax7-ChIP-Seq(GSE25064)/Homer	TAATCHGATTAC	1.42188	0.769231	1.47619	1.2
DREF/Drosophila-Promoters/Homer	AVYTATCGATAD	0.947368	1.02857	1.34483	1
Unknown2/Arabidopsis-Promoters/Homer	AAACGACGTCGTTTT	2.09091	0.933333	1.8	0.75
LIN-15B(Zf)/cElegans-L3-LIN15B-ChIP-Seq(modEncode)/Homer	CARTGGAGCGCRYTTGCATT	0.866667	0.28	2.75	0.9

## Sheet: Ileum DownvsBkgd
TABLE S13: Motif prediction in DHS near genes consistently up or down-regulated in colonized vs. germ-free ileum and colon
Motif Name	Consensus	P-value	Log P-value	q-value (Benjamini)	# of Target Sequences with Motif(of 7555)	% of Target Sequences with Motif	# of Background Sequences with Motif(of 74070)	% of Background Sequences with Motif
HNF4a(NR/DR1)/HepG2-HNF4a-ChIP-Seq(GSE25021)/Homer	CARRGKBCAAAGTYCA	1e-124	-285.5	0	2614	0.346	16287.9	0.2199
CTCF(Zf)/CD4+-CTCF-ChIP-Seq(Barski et al.)/Homer	AYAGTGCCMYCTRGTGGCCA	1e-106	-245.2	0	1128	0.1493	5254.4	0.0709
BORIS(Zf)/K562-CTCFL-ChIP-Seq(GSE32465)/Homer	CNNBRGCGCCCCCTGSTGGC	1e-77	-179.5	0	1310	0.1734	7318.7	0.0988
Atf3(bZIP)/GBM-ATF3-ChIP-Seq(GSE33912)/Homer	DATGASTCATHN	1e-73	-168.7	0	2476	0.3278	17108.5	0.231
AP-1(bZIP)/ThioMac-PU.1-ChIP-Seq(GSE21512)/Homer	VTGACTCATC	1e-66	-153.9	0	2676	0.3542	19184.5	0.259
BATF(bZIP)/Th17-BATF-ChIP-Seq(GSE39756)/Homer	DATGASTCAT	1e-62	-143.7	0	2423	0.3208	17167.2	0.2318
Jun-AP1(bZIP)/K562-cJun-ChIP-Seq(GSE31477)/Homer	GATGASTCATCN	1e-60	-138.9	0	1154	0.1528	6684.1	0.0903
Gata1(Zf)/K562-GATA1-ChIP-Seq(GSE18829)/Homer	SAGATAAGRV	1e-43	-99.92	0	2265	0.2998	16808.8	0.227
RXR(NR/DR1)/3T3L1-RXR-ChIP-Seq(GSE13511)/Homer	TAGGGCAAAGGTCA	1e-42	-96.99	0	3804	0.5036	31208.7	0.4214
NF1(CTF)/LNCAP-NF1-ChIP-Seq(Unpublished)/Homer	CYTGGCABNSTGCCAR	1e-42	-96.79	0	1772	0.2346	12556.6	0.1695
Gata2(Zf)/K562-GATA2-ChIP-Seq(GSE18829)/Homer	BBCTTATCTS	1e-41	-95.56	0	2446	0.3238	18551.6	0.2505
PPARE(NR/DR1)/3T3L1-Pparg-ChIP-Seq(GSE13511)/Homer	TGACCTTTGCCCCA	1e-39	-91.15	0	3457	0.4576	28072.8	0.3791
Gata4(Zf)/Heart-Gata4-ChIP-Seq(GSE35151)/Homer	NBWGATAAGR	1e-32	-75.66	0	3224	0.4268	26382.9	0.3562
Hnf1(Homeobox)/Liver-Foxa2-Chip-Seq(GSE25694)/Homer	GGTTAAWCATTAA	1e-29	-68.77	0	603	0.0798	3510.2	0.0474
GABPA(ETS)/Jurkat-GABPa-ChIP-Seq(GSE17954)/Homer	RACCGGAAGT	1e-29	-68.04	0	3120	0.413	25672.6	0.3466
Bach2(bZIP)/OCILy7-Bach2-ChIP-Seq(GSE44420)/Homer	TGCTGAGTCA	1e-29	-67.44	0	900	0.1191	5878.1	0.0794
Nur77(NR)/K562-NR4A1-ChIP-Seq(GSE31363)/Homer	TGACCTTTNCNT	1e-28	-64.95	0	901	0.1193	5937.7	0.0802
EWS:ERG-fusion(ETS)/CADO_ES1-EWS:ERG-ChIP-Seq(SRA014231)/Homer	ATTTCCTGTN	1e-25	-58.77	0	2594	0.3434	21088	0.2847
EKLF(Zf)/Erythrocyte-Klf1-ChIP-Seq(GSE20478)/Homer	NWGGGTGTGGCY	1e-23	-55.07	0	1171	0.155	8432.5	0.1139
GATA3(Zf)/iTreg-Gata3-ChIP-Seq(GSE20898)/Homer	AGATAASR	1e-22	-52.79	0	4077	0.5397	35514.6	0.4795
TR4(NR/DR1)/Hela-TR4-ChIP-Seq(GSE24685)/Homer	GAGGTCAAAGGTCA	1e-22	-51.93	0	738	0.0977	4880.7	0.0659
Klf4(Zf)/mES-Klf4-ChIP-Seq(GSE11431)/Homer	GCCACACCCA	1e-21	-49.82	0	1751	0.2318	13698.9	0.185
caudal(Homeobox)/Drosophila-Embryos-ChIP-Chip(modEncode)/Homer	GGYCATAAAW	1e-20	-47.75	0	2532	0.3352	20944.4	0.2828
Sp1(Zf)/Promoter/Homer	GGCCCCGCCCCC	1e-20	-46.17	0	940	0.1244	6698.4	0.0904
ERG(ETS)/VCaP-ERG-ChIP-Seq(GSE14097)/Homer	ACAGGAAGTG	1e-19	-45.69	0	4392	0.5814	38947.5	0.5259
KLF5(Zf)/LoVo-KLF5-ChIP-Seq(GSE49402)/Homer	DGGGYGKGGC	1e-19	-45.55	0	3767	0.4987	32820.3	0.4432
EHF(ETS)/LoVo-EHF-ChIP-Seq(GSE49402)/Homer	AVCAGGAAGT	1e-19	-44.51	0	3871	0.5124	33883.8	0.4575
Erra(NR)/HepG2-Erra-ChIP-Seq(GSE31477)/Homer	CAAAGGTCAG	1e-19	-44.43	0	5231	0.6925	47428.8	0.6404
Eomes(T-box)/H9-Eomes-ChIP-Seq(GSE26097)/Homer	ATTAACACCT	1e-18	-42.87	0	4924	0.6518	44396.2	0.5995
PQM-1(?)/cElegans-L3-ChIP-Seq(modEncode)/Homer	ACTGATAAGA	1e-17	-41.32	0	1380	0.1827	10675.6	0.1441
Tbet(T-box)/CD8-Tbet-ChIP-Seq(GSE33802)/Homer	AGGTGTGAAM	1e-17	-40.77	0	3218	0.426	27752.4	0.3747
Fli1(ETS)/CD8-FLI-ChIP-Seq(GSE20898)/Homer	NRYTTCCGGH	1e-17	-39.86	0	3392	0.449	29469.5	0.3979
ELF1(ETS)/Jurkat-ELF1-ChIP-Seq(SRA014231)/Homer	AVCCGGAAGT	1e-16	-38.01	0	1886	0.2497	15375.6	0.2076
Foxa2(Forkhead)/Liver-Foxa2-ChIP-Seq(GSE25694)/Homer	CYTGTTTACWYW	1e-16	-37.06	0	2632	0.3484	22362.7	0.302
ETV1(ETS)/GIST48-ETV1-ChIP-Seq(GSE22441)/Homer	AACCGGAAGT	1e-16	-36.91	0	4016	0.5316	35687.9	0.4819
ETS1(ETS)/Jurkat-ETS1-ChIP-Seq(GSE17954)/Homer	ACAGGAAGTG	1e-15	-36.69	0	3327	0.4404	29005.6	0.3917
ELF5(ETS)/T47D-ELF5-ChIP-Seq(GSE30407)/Homer	ACVAGGAAGT	1e-15	-35.27	0	2640	0.3495	22526.5	0.3042
CEBP(bZIP)/CEBPb-ChIP-Seq(GSE21512)/Homer	ATTGCGCAAC	1e-14	-32.83	0	1922	0.2544	15934.2	0.2152
STAT4(Stat)/CD4-Stat4-ChIP-Seq(GSE22104)/Homer	NYTTCCWGGAAR	1e-13	-31.97	0	2963	0.3922	25767	0.3479
STAT6/Macrophage-Stat6-ChIP-Seq(GSE38377)/Homer	TTCCKNAGAA	1e-13	-30.62	0	1874	0.2481	15594.9	0.2106
BMYB(HTH)/Hela-BMYB-ChIPSeq(GSE27030)/Homer	NHAACBGYYV	1e-13	-30.6	0	3926	0.5197	35160.7	0.4748
EWS:FLI1-fusion(ETS)/SK_N_MC-EWS:FLI1-ChIP-Seq(SRA014231)/Homer	VACAGGAAAT	1e-12	-29.61	0	2145	0.284	18162.5	0.2452
Elk1(ETS)/Hela-Elk1-ChIP-Seq(GSE31477)/Homer	HACTTCCGGY	1e-12	-29.3	0	1918	0.2539	16065.1	0.2169
HOXA9(Homeobox)/HSC-Hoxa9-ChIP-Seq(GSE33509)/Homer	GGCCATAAATCA	1e-12	-28.78	0	2120	0.2806	17971.3	0.2427
NF1-halfsite(CTF)/LNCaP-NF1-ChIP-Seq(Unpublished)/Homer	YTGCCAAG	1e-12	-28.57	0	4428	0.5862	40225.4	0.5432
Foxo1(Forkhead)/RAW-Foxo1-ChIP-Seq(Fan et al.)/Homer	CTGTTTAC	1e-12	-27.76	0	4658	0.6166	42559.8	0.5747
Tlx?(NR)/NPC-H3K4me1-ChIP-Seq(GSE16256)/Homer	CTGGCAGSCTGCCA	1e-12	-27.65	0	1797	0.2379	15026.6	0.2029
Rbpj1(?)/Panc1-Rbpj1-ChIP-Seq(GSE47459)/Homer	HTTTCCCASG	1e-11	-26.57	0	4086	0.5409	36976.2	0.4993
STAT6(Stat)/CD4-Stat6-ChIP-Seq(GSE22104)/Homer	ABTTCYYRRGAA	1e-11	-26.35	0	1802	0.2385	15137.9	0.2044
FOXP1(Forkhead)/H9-FOXP1-ChIP-Seq(GSE31006)/Homer	NYYTGTTTACHN	1e-11	-25.82	0	1543	0.2043	12775.9	0.1725
Unknown5/Drosophila-Promoters/Homer	GCTGATAASV	1e-11	-25.48	0	2024	0.2679	17249.3	0.2329
ETS(ETS)/Promoter/Homer	AACCGGAAGT	1e-10	-24.78	0	1278	0.1692	10405.7	0.1405
Elk4(ETS)/Hela-Elk4-ChIP-Seq(GSE31477)/Homer	NRYTTCCGGY	1e-10	-24.72	0	1821	0.2411	15398.4	0.2079
Cdx2(Homeobox)/mES-Cdx2-ChIP-Seq(GSE14586)/Homer	GYMATAAAAH	1e-10	-24.06	0	2230	0.2952	19262.9	0.2601
SPDEF(ETS)/VCaP-SPDEF-ChIP-Seq(SRA014231)/Homer	ASWTCCTGBT	1e-10	-23.86	0	3248	0.43	28989.6	0.3914
Tbx5(T-box)/HL1-Tbx5.biotin-ChIP-Seq(GSE21529)/Homer	AGGTGTCA	1e-10	-23.72	0	5827	0.7714	54617.1	0.7375
Ets1-distal(ETS)/CD4+-PolII-ChIP-Seq(Barski et al.)/Homer	MACAGGAAGT	1e-09	-23.03	0	1332	0.1763	10978.4	0.1482
ELT-3(Gata)/cElegans-L1-ELT3-ChIP-Seq(modEncode)/Homer	AWTGATAAGA	1e-09	-22.96	0	1494	0.1978	12466.2	0.1683
CEBP:AP1(bZIP)/ThioMac-CEBPb-ChIP-Seq(GSE21512)/Homer	DRTGTTGCAA	1e-09	-22.49	0	2184	0.2891	18921.9	0.2555
AMYB(HTH)/Testes-AMYB-ChIP-Seq(GSE44588)/Homer	TGGCAGTTGG	1e-09	-21.72	0	4004	0.5301	36496	0.4928
Unknown(Homeobox)/Limb-p300-ChIP-Seq/Homer	SSCMATWAAA	1e-09	-21.31	0	2084	0.2759	18051.9	0.2437
STAT5(Stat)/mCD4+-Stat5-ChIP-Seq(GSE12346)/Homer	RTTTCTNAGAAA	1e-09	-20.83	0	1286	0.1702	10665.8	0.144
X-box(HTH)/NPC-H3K4me1-ChIP-Seq(GSE16256)/Homer	GGTTGCCATGGCAA	1e-09	-20.76	0	475	0.0629	3457.6	0.0467
Nkx6.1(Homeobox)/Islet-Nkx6.1-ChIP-Seq(GSE40975)/Homer	GKTAATGR	1e-08	-19.22	0	5232	0.6926	48874.1	0.6599
NFkB-p65-Rel(RHD)/LPS-exp(GSE23622)/Homer	GGAAATTCCC	1e-08	-19.21	0	259	0.0343	1704.4	0.023
Esrrb(NR)/mES-Esrrb-ChIP-Seq(GSE11431)/Homer	KTGACCTTGA	1e-08	-18.9	0	2439	0.3229	21567.8	0.2912
c-Jun-CRE(bZIP)/K562-cJun-ChIP-Seq(GSE31477)/Homer	ATGACGTCATCY	1e-08	-18.75	0	1043	0.1381	8553.2	0.1155
Tcf12(HLH)/GM12878-Tcf12-ChIP-Seq(GSE32465)/Homer	VCAGCTGYTG	1e-08	-18.71	0	2986	0.3953	26819.5	0.3621
NFkB-p65(RHD)/GM12787-p65-ChIP-Seq(GSE19485)/Homer	WGGGGATTTCCC	1e-07	-18.18	0	1783	0.236	15418.6	0.2082
Atf4(bZIP)/MEF-Atf4-ChIP-Seq(GSE35681)/Homer	MTGATGCAAT	1e-07	-17.74	0	830	0.1099	6678.6	0.0902
CRE(bZIP)/Promoter/Homer	CSGTGACGTCAC	1e-07	-17.72	0	760	0.1006	6053.2	0.0817
Fox:Ebox(Forkhead:HLH)/Panc1-Foxa2-ChIP-Seq(GSE47459)/Homer	NNNVCTGWGYAAACASN	1e-07	-17.55	0	3167	0.4192	28653.8	0.3869
EBF(EBF)/proBcell-EBF-ChIP-Seq(GSE21978)/Homer	DGTCCCYRGGGA	1e-07	-17.55	0	969	0.1283	7940.5	0.1072
RFX(HTH)/K562-RFX3-ChIP-Seq(SRA012198)/Homer	CGGTTGCCATGGCAAC	1e-07	-17.02	0	360	0.0477	2592.7	0.035
Sox6(HMG)/Myotubes-Sox6-ChIP-Seq(GSE32627)/Homer	CCATTGTTNY	1e-07	-16.88	0	4072	0.5391	37530.8	0.5068
NFAT(RHD)/Jurkat-NFATC1-ChIP-Seq(Jolma et al.)/Homer	ATTTTCCATT	1e-07	-16.4	0	2648	0.3505	23745.5	0.3206
REB1/SacCer-Promoters/Homer	KCCGGGTAAYRR	1e-07	-16.4	0	691	0.0915	5494.1	0.0742
IRF1(IRF)/PBMC-IRF1-ChIP-Seq(GSE43036)/Homer	GAAAGTGAAAGT	1e-07	-16.19	0	506	0.067	3872.1	0.0523
Sox3(HMG)/NPC-Sox3-ChIP-Seq(GSE33059)/Homer	CCWTTGTY	1e-06	-15.49	0	4353	0.5763	40413.8	0.5457
ISRE(IRF)/ThioMac-LPS-exp(GSE23622)/HOMER	AGTTTCASTTTC	1e-06	-14.99	0	231	0.0306	1572.6	0.0212
Usf2(HLH)/C2C12-Usf2-ChIP-Seq(GSE36030)/Homer	GTCACGTGGT	1e-06	-14.71	0	1147	0.1518	9717.7	0.1312
IRF2(IRF)/Erythroblas-IRF2-ChIP-Seq(GSE36985)/Homer	GAAASYGAAASY	1e-06	-14.44	0	375	0.0496	2798.4	0.0378
Hoxc9(Homeobox)/Ainv15-Hoxc9-ChIP-Seq(GSE21812)/Homer	GGCCATAAATCA	1e-06	-14.31	0	1599	0.2117	13947.4	0.1883
Sox2(HMG)/mES-Sox2-ChIP-Seq(GSE11431)/Homer	BCCATTGTTC	1e-06	-14.25	0	2753	0.3644	24925.9	0.3366
STAT1(Stat)/HelaS3-STAT1-ChIP-Seq(GSE12782)/Homer	NATTTCCNGGAAAT	1e-06	-14.11	0	1071	0.1418	9052.9	0.1222
Pbx3(Homeobox)/GM12878-PBX3-ChIP-Seq(GSE32465)/Homer	SCTGTCAMTCAN	1e-06	-14.1	0	1043	0.1381	8795.5	0.1188
CHR/Cell-Cycle-Exp/Homer	SRGTTTCAAA	1e-06	-14.03	0	1823	0.2413	16074.6	0.2171
Bach1(bZIP)/K562-Bach1-ChIP-Seq(GSE31477)/Homer	AWWNTGCTGAGTCAT	1e-06	-13.92	0	231	0.0306	1598	0.0216
Lhx3(Homeobox)/Neuron-Lhx3-ChIP-Seq(GSE31456)/Homer	ADBTAATTAR	1e-06	-13.9	0	3991	0.5283	36989.5	0.4995
MYB(HTH)/ERMYB-Myb-ChIPSeq(GSE22095)/Homer	GGCVGTTR	1e-05	-13.52	0	4238	0.561	39452.5	0.5327
Unknown1(NR/Ini-like)/Drosophila-Promoters/Homer	MYGGTCACACTG	1e-05	-13.45	0	815	0.1079	6747.3	0.0911
GATA:SCL/Ter119-SCL-ChIP-Seq(GSE18720)/Homer	CRGCTGBNGNSNNSAGATAA	1e-05	-13.39	0	532	0.0704	4208.8	0.0568
NF1:FOXA1/LNCAP-FOXA1-ChIP-Seq(GSE27824)/Homer	WNTGTTTRYTTTGGCA	1e-05	-13.34	0	221	0.0293	1530.4	0.0207
Stat3(Stat)/mES-Stat3-ChIP-Seq(GSE11431)/Homer	CTTCCGGGAA	1e-05	-13.1	0	1755	0.2323	15501.4	0.2093
Mef2a(MADS)/HL1-Mef2a.biotin-ChIP-Seq(GSE21529/Homer	CYAAAAATAG	1e-05	-12.89	0	1256	0.1663	10838.1	0.1463
TEAD(TEA)/Fibroblast-PU.1-ChIP-Seq(Unpublished)/Homer	YCWGGAATGY	1e-05	-12.61	0	2091	0.2768	18725.5	0.2528
AP-2gamma(AP2)/MCF7-TFAP2C-ChIP-Seq(GSE21234)/Homer	SCCTSAGGSCAW	1e-05	-12.34	0	2990	0.3958	27379.5	0.3697
TCFL2(HMG)/K562-TCF7L2-ChIP-Seq(GSE29196)/Homer	ACWTCAAAGG	1e-05	-12.01	0	373	0.0494	2864.5	0.0387
AR-halfsite(NR)/LNCaP-AR-ChIP-Seq(GSE27824)/Homer	CCAGGAACAG	1e-05	-11.96	0	6205	0.8214	59291.6	0.8006
PU.1(ETS)/ThioMac-PU.1-ChIP-Seq(GSE21512)/Homer	AGAGGAAGTG	1e-05	-11.89	0	1862	0.2465	16608.7	0.2243
Stat3+il21(Stat)/CD4-Stat3-ChIP-Seq(GSE19198)/Homer	SVYTTCCNGGAARB	1e-05	-11.88	0	2373	0.3141	21481.4	0.2901
Nanog(Homeobox)/mES-Nanog-ChIP-Seq(GSE11724)/Homer	RGCCATTAAC	1e-05	-11.85	0	6349	0.8405	60775	0.8206
Lhx2(Homeobox)/HFSC-Lhx2-ChIP-Seq(GSE48068)/Homer	TAATTAGN	1e-05	-11.79	0	2927	0.3875	26822	0.3622
Rfx2(HTH)/LoVo-RFX2-ChIP-Seq(GSE49402)/Homer	GTTGCCATGGCAACM	1e-05	-11.64	0	387	0.0512	3001	0.0405
Isl1(Homeobox)/Neuron-Isl1-ChIP-Seq(GSE31456)/Homer	CTAATKGV	0.0001	-11.35	0	4590	0.6076	43135.1	0.5824
E-box/Drosophila-Promoters/Homer	AACAGCTGTTHN	0.0001	-11.26	0	991	0.1312	8486.2	0.1146
TEAD4(TEA)/Tropoblast-Tead4-ChIP-Seq(GSE37350)/Homer	CCWGGAATGY	0.0001	-11.2	0	2600	0.3442	23723.5	0.3203
Atf1(bZIP)/K562-ATF1-ChIP-Seq(GSE31477)/Homer	GATGACGTCA	0.0001	-11.02	0	1957	0.2591	17583.7	0.2374
Tcf4(HMG)/Hct116-Tcf4-ChIP-Seq(SRA012054)/Homer	ASATCAAAGGVA	0.0001	-10.63	0.0001	1651	0.2186	14712.7	0.1987
HLH-1(bHLH)/cElegans-Embryo-HLH1-ChIP-Seq(modEncode)/Homer	RACAGCTGTTBH	0.0001	-10.55	0.0001	2587	0.3425	23660.5	0.3195
EBF1(EBF)/Near-E2A-ChIP-Seq(GSE21512)/Homer	GTCCCCWGGGGA	0.0001	-10.42	0.0001	3153	0.4174	29146.7	0.3936
Myf5(bHLH)/GM-Myf5-ChIP-Seq(GSE24852)/Homer	BAACAGCTGT	0.0001	-10.2	0.0001	2347	0.3107	21386.5	0.2888
HRE(HSF)/Striatum-HSF1-ChIP-Seq(GSE38000)/Homer	TTCTAGAABNTTCTA	0.0001	-10.11	0.0001	934	0.1236	8033.6	0.1085
E-box(HLH)/Promoter/Homer	SSGGTCACGTGA	0.0001	-10.03	0.0001	283	0.0375	2153.9	0.0291
E2F4(E2F)/K562-E2F4-ChIP-Seq(GSE31477)/Homer	GGCGGGAAAH	0.0001	-9.971	0.0001	999	0.1322	8645.4	0.1167
FXR(NR/IR1)/Liver-FXR-ChIP-Seq(Chong et al.)/Homer	AGGTCANTGACCTB	0.0001	-9.741	0.0002	1460	0.1933	12981.4	0.1753
E2F6(E2F)/Hela-E2F6-ChIP-Seq(GSE31477)/Homer	GGCGGGAARN	0.0001	-9.705	0.0002	1371	0.1815	12145.3	0.164
NF-E2(bZIP)/K562-NFE2-ChIP-Seq(GSE31477)/Homer	GATGACTCAGCA	0.0001	-9.536	0.0002	250	0.0331	1885.2	0.0255
Chop(bZIP)/MEF-Chop-ChIP-Seq(GSE35681)/Homer	ATTGCATCAT	0.0001	-9.49	0.0002	625	0.0827	5231.1	0.0706
Unknown-ESC-element/mES-Nanog-ChIP-Seq(GSE11724)/Homer	CACAGCAGGGGG	0.0001	-9.475	0.0002	2082	0.2756	18917.2	0.2554
GATA-IR4(Zf)/iTreg-Gata3-ChIP-Seq(GSE20898)/Homer	NAGATWNBNATCTNN	0.0001	-9.302	0.0002	277	0.0367	2127.5	0.0287
MyoG(HLH)/C2C12-MyoG-ChIP-Seq(GSE36024)/Homer	AACAGCTG	0.0001	-9.226	0.0002	3157	0.4179	29312.8	0.3958
Tbox:Smad/ESCd5-Smad2_3-ChIP-Seq(GSE29422)/Homer	AGGTGHCAGACA	0.001	-8.734	0.0004	815	0.1079	7023.9	0.0948
MyoD(HLH)/Myotube-MyoD-ChIP-Seq(GSE21614)/Homer	RRCAGCTGYTSY	0.001	-8.478	0.0005	2435	0.3223	22408.6	0.3026
AP-2alpha(AP2)/Hela-AP2alpha-ChIP-Seq(GSE31477)/Homer	ATGCCCTGAGGC	0.001	-8.056	0.0008	2458	0.3254	22677	0.3062
NFAT:AP1/Jurkat-NFATC1-ChIP-Seq(Jolma et al.)/Homer	SARTGGAAAAWRTGAGTCAB	0.001	-7.794	0.001	612	0.081	5212.4	0.0704
JunD(bZIP)/K562-JunD-ChIP-Seq/Homer	ATGACGTCATCN	0.001	-7.656	0.0011	332	0.044	2679.5	0.0362
Initiator/Drosophila-Promoters/Homer	NTCAGTYG	0.001	-7.386	0.0015	5043	0.6676	48063	0.649
Pdx1(Homeobox)/Islet-Pdx1-ChIP-Seq(SRA008281)/Homer	YCATYAATCA	0.001	-7.327	0.0015	2663	0.3525	24741.5	0.3341
LXRE(NR/DR4)/BLRP(RAW)-LXRb-ChIP-Seq(GSE21512)/Homer	RGGTTACTANAGGTCA	0.001	-7.312	0.0016	226	0.0299	1756.4	0.0237
SCL(HLH)/HPC7-Scl-ChIP-Seq(GSE13511)/Homer	AVCAGCTG	0.001	-6.977	0.0022	6339	0.8392	61096.1	0.825
Rfx1(HTH)/NPC-H3K4me1-ChIP-Seq(GSE16256)/Homer	KGTTGCCATGGCAA	0.01	-6.879	0.0024	795	0.1052	6970.5	0.0941
PBX1(Homeobox)/MCF7-PBX1-ChIP-Seq(GSE28007)/Homer	GSCTGTCACTCA	0.01	-6.877	0.0024	390	0.0516	3239.2	0.0437
ETS:E-box/HPC7-Scl-ChIP-Seq(GSE22178)/Homer	AGGAARCAGCTG	0.01	-6.861	0.0024	393	0.052	3267.3	0.0441
MafA(bZIP)/Islet-MafA-ChIP-Seq(GSE30298)/Homer	TGCTGACTCA	0.01	-6.586	0.0031	2604	0.3447	24262.4	0.3276
E2A(HLH)/proBcell-E2A-ChIP-Seq(GSE21978)/Homer	DNRCAGCTGY	0.01	-6.496	0.0034	3837	0.5079	36286.9	0.49
Bcl6(Zf)/Liver-Bcl6-ChIP-Seq(GSE31578)/Homer	NNNCTTTCCAGGAAA	0.01	-6.214	0.0044	3848	0.5094	36433.8	0.492
NeuroD1(bHLH)/Islet-NeuroD1-ChIP-Seq(GSE30298)/Homer	GCCATCTGTT	0.01	-6.166	0.0046	2706	0.3582	25305.4	0.3417
Foxh1(Forkhead)/hESC-FOXH1-ChIP-Seq(GSE29422)/Homer	NNTGTGGATTSS	0.01	-6.153	0.0046	1842	0.2438	16971.3	0.2292
CArG(MADS)/PUER-Srf-ChIP-Seq(Sullivan et al.)/Homer	CCATATATGGNM	0.01	-6.105	0.0048	1065	0.141	9572.9	0.1293
Unknown3/Arabidopsis-Promoters/Homer	AYTAAACCGG	0.01	-5.88	0.006	510	0.0675	4397.6	0.0594
TRa(NR)/C17.2-TRa-ChIP-Seq(GSE38347)/Homer	GGTCANYTGAGGWCA	0.01	-5.866	0.006	1566	0.2073	14361.8	0.1939
Tcf3(HMG)/mES-Tcf3-ChIP-Seq(GSE11724)/Homer	ASWTCAAAGG	0.01	-5.7	0.0071	988	0.1308	8883.5	0.12
TATA-Box(TBP)/Promoter/Homer	CCTTTTAWAGSC	0.01	-5.559	0.0081	3563	0.4717	33738.5	0.4556
Pax7-long(Paired/Homeobox)/Myoblast-Pax7-ChIP-Seq(GSE25064)/Homer	TAATCHGATTAC	0.01	-5.503	0.0085	69	0.0091	471.1	0.0064
Unknown4/Drosophila-Promoters/Homer	AAAAATACCRMA	0.01	-5.465	0.0088	358	0.0474	3027.9	0.0409
HOXD13(Homeobox)/Chicken-Hoxd13-ChIP-Seq(GSE38910)/Homer	NCYAATAAAA	0.01	-5.352	0.0098	2942	0.3895	27712.2	0.3742
ETS:RUNX/Jurkat-RUNX1-ChIP-Seq(GSE17954)/Homer	RCAGGATGTGGT	0.01	-5.32	0.01	367	0.0486	3118.4	0.0421
RUNX-AML(Runt)/CD4+-PolII-ChIP-Seq(Barski et al.)/Homer	GCTGTGGTTW	0.01	-5.277	0.0104	2355	0.3118	22028.1	0.2974
IRF4(IRF)/GM12878-IRF4-ChIP-Seq(GSE32465)/Homer	ACTGAAACCA	0.01	-5.189	0.0113	1367	0.181	12538.6	0.1693
USF1(HLH)/GM12878-Usf1-ChIP-Seq(GSE32465)/Homer	SGTCACGTGR	0.01	-5.072	0.0126	1462	0.1935	13460.3	0.1818
Cbf1(bHLH)/Yeast-Cbf1-ChIP-Seq(GSE29506)/Homer	TCACGTGAYH	0.01	-5.031	0.013	877	0.1161	7899.4	0.1067
MafF(bZIP)/HepG2-MafF-ChIP-Seq(GSE31477)/Homer	HWWGTCAGCAWWTTT	0.01	-4.996	0.0134	826	0.1093	7421.1	0.1002
SeqBias: A/T bias	WWWWWWWWWW	0.01	-4.983	0.0135	7410	0.9809	72318.2	0.9765
Nrf2(bZIP)/Lymphoblast-Nrf2-ChIP-Seq(GSE37589)/Homer	HTGCTGAGTCAT	0.01	-4.96	0.0137	196	0.0259	1588	0.0214
GFY(?)/Promoter/Homer	ACTACAATTCCC	0.01	-4.846	0.0153	243	0.0322	2016.5	0.0272
Unknown3/Drosophila-Promoters/Homer	ACVAKCTGGCAGCGC	0.01	-4.84	0.0153	314	0.0416	2662.6	0.036
FOXA1(Forkhead)/LNCAP-FOXA1-ChIP-Seq(GSE27824)/Homer	WAAGTAAACA	0.01	-4.816	0.0155	3346	0.4429	31733.8	0.4285
Gfi1b(Zf)/HPC7-Gfi1b-ChIP-Seq(GSE22178)/Homer	MAATCACTGC	0.01	-4.805	0.0156	2007	0.2657	18733.8	0.253
Unknown2/Arabidopsis-Promoters/Homer	AAACGACGTCGTTTT	0.01	-4.786	0.0158	17	0.0023	81.6	0.0011
Atoh1(bHLH)/Cerebellum-Atoh1-ChIP-Seq(GSE22111)/Homer	VNRVCAGCTGGY	0.01	-4.768	0.016	3248	0.43	30784.5	0.4157
AARE(HLH)/mES-cMyc-ChIP-Seq/Homer	GATTGCATCA	0.1	-4.485	0.0211	252	0.0334	2117.9	0.0286
SeqBias: GCW-triplet	GCWGCWGCWGCW	0.1	-4.378	0.0233	7485	0.9909	73167.7	0.988
SeqBias: GA-repeat	GAGAGAGAGA	0.1	-4.378	0.0233	6961	0.9215	67685.6	0.9139
SeqBias: polyC-repeat	CCCCCCCCCC	0.1	-4.316	0.0245	7408	0.9807	72331.2	0.9767
RBPJ:Ebox/Panc1-Rbpj1-ChIP-Seq(GSE47459)/Homer	GGGRAARRGRMCAGMTG	0.1	-4.135	0.0292	1303	0.1725	12056.7	0.1628
SeqBias: C/A-bias	MMMMMMMMMM	0.1	-4.043	0.0318	7491	0.9917	73247.4	0.989
MafK(bZIP)/C2C12-MafK-ChIP-Seq(GSE36030)/Homer	GCTGASTCAGCA	0.1	-4.008	0.0328	913	0.1209	8348.5	0.1127
E2F(E2F)/Cell-Cycle-Exp/Homer	TTSGCGCGAAAA	0.1	-3.883	0.0369	144	0.0191	1172.8	0.0158
Six1(Homeobox)/Myoblast-Six1-ChIP-Chip(GSE20150)/Homer	GKVTCADRTTWC	0.1	-3.827	0.0388	831	0.11	7589.4	0.1025
Oct4:Sox17/F9-Sox17-ChIP-Seq(GSE44553)/Homer	CCATTGTATGCAAAT	0.1	-3.771	0.0408	423	0.056	3745.3	0.0506
Ap4(HLH)/AML-Tfap4-ChIP-Seq(GSE45738)/Homer	NAHCAGCTGD	0.1	-3.599	0.0482	3394	0.4493	32416.8	0.4377
Tbx20(T-box)/Heart-Tbx20-ChIP-Seq(GSE29636)/Homer	GGTGYTGACAGS	0.1	-3.496	0.0531	840	0.1112	7713.2	0.1041
SeqBias: polyA-repeat	AAAAAAAAAA	0.1	-3.458	0.0549	7516	0.995	73549.9	0.9931
E2F7(E2F)/Hela-E2F7-ChIP-Seq(GSE32673)/Homer	VDTTTCCCGCCA	0.1	-3.451	0.0549	278	0.0368	2420.8	0.0327
CEBP:CEBP(bZIP)/MEF-Chop-ChIP-Seq(GSE35681)/Homer	NTNATGCAAYMNNHTGMAAY	0.1	-3.443	0.055	383	0.0507	3398.1	0.0459
Olig2(bHLH)/Neuron-Olig2-ChIP-Seq(GSE30882)/Homer	RCCATMTGTT	0.1	-3.368	0.059	4607	0.6099	44365.9	0.5991
PU.1-IRF(ETS:IRF)/Bcell-PU.1-ChIP-Seq(GSE21512)/Homer	MGGAAGTGAAAC	0.1	-3.319	0.0616	3657	0.4841	35045.8	0.4732
Maz(Zf)/HepG2-Maz-ChIP-Seq(GSE31477)/Homer	GGGGGGGG	0.1	-3.148	0.0727	3409	0.4513	32653.8	0.4409
Mef2c(MADS)/GM12878-Mef2c-ChIP-Seq(GSE32465)/Homer	DCYAAAAATAGM	0.1	-3.132	0.0734	1203	0.1593	11237.6	0.1517
ZBTB33(Zf)/GM12878-ZBTB33-ChIP-Seq(GSE32465)/Homer	GGVTCTCGCGAGAAC	0.1	-3.128	0.0734	70	0.0093	546.4	0.0074
SUT1?/SacCer-Promoters/Homer	CCCCGCGC	0.1	-3.025	0.0808	6345	0.84	61649.4	0.8324
SeqBias: G/A bias	RRRRRRRRRR	0.1	-2.989	0.0833	7501	0.993	73400.8	0.9911
Tcfcp2l1(CP2)/mES-Tcfcp2l1-ChIP-Seq(GSE11431)/Homer	NRAACCRGTTYRAACCRGYT	0.1	-2.903	0.0903	618	0.0818	5670.4	0.0766
HRE(HSF)/HepG2-HSF1-ChIP-Seq(GSE31477)/Homer	BSTTCTRGAABVTTCYAGAA	0.1	-2.821	0.0976	681	0.0902	6280.9	0.0848
PAX5-shortForm(Paired/Homeobox)/GM12878-PAX5-ChIP-Seq(GSE32465)/Homer	GTCACGCTCSCTGM	0.1	-2.687	0.1109	398	0.0527	3607.6	0.0487
DPL-1(E2F)/cElegans-Adult-ChIP-Seq(modEncode)/Homer	TAGCGCGC	0.1	-2.66	0.1133	1275	0.1688	12006.9	0.1621
Smad3(MAD)/NPC-Smad3-ChIP-Seq(GSE36673)/Homer	TWGTCTGV	0.1	-2.622	0.1171	5544	0.7339	53768.4	0.726
Srebp2(HLH)/HepG2-Srebp2-ChIP-Seq(GSE31477)/Homer	CGGTCACSCCAC	0.1	-2.569	0.1229	505	0.0669	4634.8	0.0626
Mouse_Recombination_Hotspot/Testis-DMC1-ChIP-Seq(GSE24438)/Homer	ACTYKNATTCGTGNTACTTC	0.1	-2.514	0.1291	226	0.0299	2005.8	0.0271
Srebp1a(HLH)/HepG2-Srebp1a-ChIP-Seq(GSE31477)/Homer	RTCACSCCAY	0.1	-2.483	0.1325	744	0.0985	6927.6	0.0935
TOD6?/SacCer-Promoters/Homer	GCGATGAGMT	0.1	-2.439	0.1377	623	0.0825	5775.4	0.078
GEI-11(Myb?)/cElegans-L4-GEI11-ChIP-Seq(modEncode)/Homer	CCGACAYYTYACGGG	0.1	-2.411	0.1408	157	0.0208	1370.2	0.0185
GATA-DR4(Zf)/iTreg-Gata3-ChIP-Seq(GSE20898)/Homer	AGATGKDGAGATAAG	0.1	-2.389	0.1432	280	0.0371	2522.5	0.0341
NFkB-p50,p52(RHD)/p50-ChIP-Chip(Schreiber et al.)/Homer	GGGGGAATCCCC	0.1	-2.32	0.1527	406	0.0537	3721.8	0.0503
Unknown1/Arabidopsis-Promoters/Homer	RGGGTAWWWTHGTAA	1	-2.126	0.1844	311	0.0412	2840.3	0.0384
GRE/RAW264.7-GRE-ChIP-Seq(Unpublished)/Homer	VAGRACAKWCTGTYC	1	-2.079	0.1924	860	0.1138	8105	0.1094
Hoxb4(Homeobox)/ES-Hoxb4-ChIP-Seq(GSE34014)/Homer	TGATTRATGGCY	1	-2.073	0.1925	654	0.0866	6123.6	0.0827
E2F1(E2F)/Hela-E2F1-ChIP-Seq(GSE22478)/Homer	CWGGCGGGAA	1	-2.071	0.1925	519	0.0687	4829	0.0652
VDR(NR/DR3)/GM10855-VDR+vitD-ChIP-Seq(GSE22484)/Homer	ARAGGTCANWGAGTTCANNN	1	-2.061	0.1929	808	0.107	7606.7	0.1027
RUNX(Runt)/HPC7-Runx1-ChIP-Seq(GSE22178)/Homer	SAAACCACAG	1	-2.014	0.2012	2292	0.3034	22011.3	0.2972
Ik-1	NHTTGGGAATRCC	1	-1.902	0.224	7525	0.9962	73707	0.9952
REST-NRSF(Zf)/Jurkat-NRSF-ChIP-Seq/Homer	GGMGCTGTCCATGGTGCTGA	1	-1.883	0.227	32	0.0042	254.1	0.0034
ABF1/SacCer-Promoters/Homer	CGTRNAAARTGA	1	-1.842	0.2355	521	0.069	4880.2	0.0659
SeqBias: CG bias	SSSSSSSSSS	1	-1.826	0.238	6798	0.8999	66372.6	0.8962
CLOCK(HLH)/Liver-Clock-ChIP-Seq(GSE39860)/Homer	GHCACGTG	1	-1.772	0.2499	1716	0.2272	16464	0.2223
PRDM9(Zf)/Testis-DMC1-ChIP-Seq(GSE35498)/Homer	ADGGYAGYAGCATCT	1	-1.752	0.254	1397	0.1849	13367.9	0.1805
PR(NR)/T47D-PR-ChIP-Seq(GSE31130)/Homer	VAGRACAKNCTGTBC	1	-1.735	0.257	4930	0.6526	47931.2	0.6472
Pitx1(Homeobox)/Chicken-Pitx1-ChIP-Seq(GSE38910)/Homer	TAATCCCN	1	-1.726	0.258	6333	0.8384	61776.8	0.8342
Smad4(MAD)/ESC-SMAD4-ChIP-Seq(GSE29422)/Homer	VBSYGTCTGG	1	-1.609	0.2886	4092	0.5417	39737.8	0.5366
EBNA1(EBV virus)/Raji-EBNA1-ChIP-Seq(GSE30709)/Homer	GGYAGCAYDTGCTDCCCNNN	1	-1.582	0.295	69	0.0091	605.7	0.0082
HNF6(Homeobox)/Liver-Hnf6-ChIP-Seq(ERP000394)/Homer	NTATYGATCH	1	-1.577	0.2953	1470	0.1946	14119.1	0.1906
FOXA1(Forkhead)/MCF7-FOXA1-ChIP-Seq(GSE26831)/Homer	WAAGTAAACA	1	-1.569	0.2964	2862	0.3789	27702.2	0.3741
c-Myc(HLH)/LNCAP-cMyc-ChIP-Seq(unpublished)/Homer	VCCACGTG	1	-1.564	0.2964	1272	0.1684	12197.7	0.1647
E-box/Arabidopsis-Promoters/Homer	GCCACGTG	1	-1.543	0.3012	1258	0.1665	12066	0.1629
EFL-1(E2F)/cElegans-L1-EFL1-ChIP-Seq(modEncode)/Homer	TGCAARYGCGCTCYA	1	-1.452	0.3284	58	0.0077	510.4	0.0069
Ptf1a(HLH)/Panc1-Ptf1a-ChIP-Seq(GSE47459)/Homer	ACAGCTGTTN	1	-1.44	0.3307	5219	0.6909	50864.7	0.6868
RUNX1(Runt)/Jurkat-RUNX1-ChIP-Seq(GSE29180)/Homer	AAACCACARM	1	-1.433	0.3316	3042	0.4027	29507.6	0.3984
PAX5(Paired/Homeobox)/GM12878-PAX5-ChIP-Seq(GSE32465)/Homer	GCAGCCAAGCRTGACH	1	-1.433	0.3316	1274	0.1687	12249.3	0.1654
Znf263(Zf)/K562-Znf263-ChIP-Seq(GSE31477)/Homer	CVGTSCTCCC	1	-1.406	0.3378	4234	0.5605	41198.9	0.5563
HIF2a(HLH)/785_O-HIF2a-ChIP-Seq(GSE34871)/Homer	GCACGTACCC	1	-1.386	0.3429	977	0.1293	9373.1	0.1266
CRX(Homeobox)/Retina-Crx-ChIP-Seq(GSE20012)/Homer	GCTAATCC	1	-1.284	0.378	4994	0.6611	48704.8	0.6576
GLI3(Zf)/GLI3-ChIP-Chip(GSE11077)/Homer	CGTGGGTGGTCC	1	-1.072	0.4653	522	0.0691	5022.1	0.0678
Smad2(MAD)/ES-SMAD2-ChIP-Seq(GSE29422)/Homer	CTGTCTGG	1	-1.07	0.4653	4036	0.5343	39383.7	0.5318
ZFX(Zf)/mES-Zfx-ChIP-Seq(GSE11431)/Homer	AGGCCTRG	1	-0.9772	0.5068	3355	0.4441	32747.4	0.4422
GRE(NR/IR3)/A549-GR-ChIP-Seq(GSE32465)/Homer	NRGVACABNVTGTYCY	1	-0.9677	0.5094	493	0.0653	4762.1	0.0643
FHY3(FAR1)/Arabidopsis-FHY3-ChIP-Seq(GSE30711)/Homer	HHCACGCGCBTN	1	-0.9084	0.5382	642	0.085	6230	0.0841
Unknown2/Drosophila-Promoters/Homer	CATCMCTA	1	-0.8682	0.5578	3526	0.4668	34473.1	0.4655
Nkx3.1(Homeobox)/LNCaP-Nkx3.1-ChIP-Seq(GSE28264)/Homer	AAGCACTTAA	1	-0.7519	0.6238	4977	0.6589	48758.2	0.6584
p53(p53)/mES-cMyc-ChIP-Seq(GSE11431)/Homer	ACATGCCCGGGCAT	1	-0.7302	0.6347	63	0.0083	610.6	0.0082
bHLHE40(HLH)/HepG2-BHLHE40-ChIP-Seq(GSE31477)/Homer	KCACGTGMCN	1	-0.6688	0.672	922	0.1221	9044.5	0.1221
Egr2/Thymocytes-Egr2-ChIP-Seq(GSE34254)/Homer	NGCGTGGGCGGR	1	-0.658	0.6764	595	0.0788	5840.1	0.0789
GFX(?)/Promoter/Homer	ATTCTCGCGAGA	1	-0.6351	0.6891	16	0.0021	156.3	0.0021
GRHL2(CP2)/HBE-GRHL2-ChIP-Seq(GSE46194)/Homer	AAACYKGTTWDACMRGTTTB	1	-0.5413	0.7536	1258	0.1665	12398.8	0.1674
CTCF-SatelliteElement/CD4+-CTCF-ChIP-Seq(Barski et al.)/Homer	TGCAGTTCCMVNWRTGGCCA	1	-0.5303	0.7587	79	0.0105	791.1	0.0107
E2A-nearPU.1(HLH)/Bcell-PU.1-ChIP-Seq(GSE21512)/Homer	NVCACCTGBN	1	-0.5239	0.7603	3784	0.5009	37197.3	0.5023
PRDM1/BMI1(Zf)/Hela-PRDM1-ChIP-Seq(GSE31477)/Homer	ACTTTCACTTTC	1	-0.5115	0.7666	1776	0.2351	17503.3	0.2363
SeqBias: CG-repeat	CGCGCGCGCG	1	-0.5019	0.7707	1971	0.2609	19424	0.2623
EGL-5(Homeobox)/cElegans-L3-EGL5-ChIP-Seq(modEncode)/Homer	ATTTAATGGG	1	-0.4982	0.7707	3512	0.4649	34548.4	0.4665
ERE(NR/IR3)/MCF7-ERa-ChIP-Seq(Unpublished)/Homer	VAGGTCACNSTGACC	1	-0.4868	0.776	1026	0.1358	10144.9	0.137
PAX3:FKHR-fusion(Paired/Homeobox)/Rh4-PAX3:FKHR-ChIP-Seq(GSE19063)/Homer	ACCRTGACTAATTNN	1	-0.4772	0.7801	661	0.0875	6554.9	0.0885
PRDM14(Zf)/H1-PRDM14-ChIP-Seq(GSE22767)/Homer	RGGTCTCTAACY	1	-0.4467	0.801	1229	0.1627	12163.8	0.1642
NRF1(NRF)/MCF7-NRF1-ChIP-Seq(Unpublished)/Homer	CTGCGCATGCGC	1	-0.4273	0.8134	288	0.0381	2887.8	0.039
ZNF711(Zf)/SH-SY5Y-ZNF711-ChIP-Seq(GSE20673)/Homer	AGGCCTAG	1	-0.4142	0.8206	3967	0.5252	39072.4	0.5276
NPAS2(HLH)/Liver-NPAS2-ChIP-Seq(GSE39860)/Homer	KCCACGTGAC	1	-0.4141	0.8206	3051	0.4039	30089.6	0.4063
Nkx2.5(Homeobox)/HL1-Nkx2.5.biotin-ChIP-Seq(GSE21529)/Homer	RRSCACTYAA	1	-0.4098	0.8206	4890	0.6473	48116.4	0.6497
DREF/Drosophila-Promoters/Homer	AVYTATCGATAD	1	-0.4077	0.8206	27	0.0036	284.9	0.0038
RUNX2(Runt)/PCa-RUNX2-ChIP-Seq(GSE33889)/Homer	NWAACCACADNN	1	-0.4074	0.8206	2578	0.3413	25452	0.3437
Pho4(bHLH)/Yeast-Pho4-ChIP-Seq(GSE29506)/Homer	AAGCACGTGBGD	1	-0.376	0.8355	595	0.0788	5947.3	0.0803
LIN-15B(Zf)/cElegans-L3-LIN15B-ChIP-Seq(modEncode)/Homer	CARTGGAGCGCRYTTGCATT	1	-0.3679	0.8389	10	0.0013	111.5	0.0015
CES-1(Homeobox)/cElegans-L1-CES1-ChIP-Seq(modEncode)/Homer	AAATTSAATTTN	1	-0.3615	0.8409	1328	0.1758	13191.7	0.1781
Reverb(NR/DR2)/BLRP(RAW)-Reverba-ChIP-Seq(GSE45914)/Homer	GTRGGTCASTGGGTCA	1	-0.3454	0.8512	528	0.0699	5298.8	0.0715
Oct4(POU/Homeobox)/mES-Oct4-ChIP-Seq(GSE11431)/Homer	ATTTGCATAW	1	-0.3421	0.8512	1289	0.1706	12820.9	0.1731
GATA-IR3(Zf)/iTreg-Gata3-ChIP-Seq(GSE20898)/Homer	NNNNNBAGATAWYATCTVHN	1	-0.314	0.8714	430	0.0569	4340.9	0.0586
Phox2a(Homeobox)/Neuron-Phox2a-ChIP-Seq(GSE31456)/Homer	YTAATYNRATTA	1	-0.2787	0.8992	941	0.1246	9428.2	0.1273
Pax8(Paired/Homeobox)/Thyroid-Pax8-ChIP-Seq(GSE26938)/Homer	GTCATGCHTGRCTGS	1	-0.2658	0.9074	1187	0.1571	11871.6	0.1603
NFY(CCAAT)/Promoter/Homer	RGCCAATSRG	1	-0.252	0.9164	2357	0.312	23420.9	0.3162
GAGA-repeat/SacCer-Promoters/Homer	CTYTCTYTCTCTCTC	1	-0.2244	0.9384	6289	0.8325	61929.2	0.8362
LIN-39(Homeobox)/cElegans.L3-LIN39-ChIP-Seq(modEncode)/Homer	ATGATTRATG	1	-0.1786	0.9786	2879	0.3811	28647.8	0.3868
PCF/Arabidopsis-Promoters/Homer	NNWWWTGGGCYTDDN	1	-0.1271	1	793	0.105	8097.8	0.1093
Tal1	CATCTG	1	-0.1072	1	3847	0.5093	38279.2	0.5169
Rfx5(HTH)/GM12878-Rfx5-ChIP-Seq(GSE31477)/Homer	SCCTAGCAACAG	1	-0.1054	1	1218	0.1612	12362.1	0.1669
T1ISRE(IRF)/Ifnb-Exp/Homer	ACTTTCGTTTCT	1	-0.1052	1	38	0.005	455.2	0.0061
GFY-Staf/Promoters/Homer	RACTACAATTCCCAGAAKGC	1	-0.08103	1	152	0.0201	1671.4	0.0226
PHA-4(Forkhead)/cElegans-Embryos-PHA4-ChIP-Seq(modEncode)/Homer	KTGTTTGC	1	-0.06909	1	5736	0.7593	56799.1	0.7669
Nr5a2(NR)/Pancreas-LRH1-ChIP-Seq(GSE34295)/Homer	BTCAAGGTCA	1	-0.06594	1	2461	0.3258	24764.8	0.3344
Nr5a2(NR)/mES-Nr5a2-ChIP-Seq(GSE19019)/Homer	BTCAAGGTCA	1	-0.06299	1	1981	0.2622	20029.1	0.2704
Nkx2.1(Homeobox)/LungAC-Nkx2.1-ChIP-Seq(GSE43252)/Homer	RSCACTYRAG	1	-0.05951	1	5449	0.7213	54043.6	0.7297
TATA-box/Drosophila-Promoters/Homer	CTATAAAAGCSV	1	-0.05919	1	230	0.0304	2501.5	0.0338
ZNF143|STAF(Zf)/CUTLL-ZNF143-ChIP-Seq(GSE29600)/Homer	ATTTCCCAGVAKSCY	1	-0.0446	1	1389	0.1839	14212	0.1919
Oct2(POU/Homeobox)/Bcell-Oct2-ChIP-Seq(GSE21512)/Homer	ATATGCAAAT	1	-0.03948	1	756	0.1001	7890.8	0.1065
p63(p53)/Keratinocyte-p63-ChIP-Seq(GSE17611)/Homer	NNDRCATGYCYNRRCATGYH	1	-0.03096	1	1191	0.1577	12291.9	0.166
HIF-1a(HLH)/MCF7-HIF1a-ChIP-Seq(GSE28352)/Homer	TACGTGCV	1	-0.03067	1	640	0.0847	6748.7	0.0911
PIF5ox(bHLH)/Arabidopsis-PIF5ox-ChIP-Seq(GSE35062)/Homer	BCACGTGVDN	1	-0.01597	1	2845	0.3766	28822.2	0.3892
SeqBias: CA-repeat	CACACACACA	1	-0.0126	1	6623	0.8768	65571.1	0.8854
bZIP:IRF/Th17-BatF-ChIP-Seq(GSE39756)/Homer	NAGTTTCABTHTGACTNW	1	-0.01092	1	1357	0.1796	14099.5	0.1904
SFP1/SacCer-Promoters/Homer	DDAAAAATTTTY	1	-0.009209	1	169	0.0224	1983.6	0.0268
Pax7(Paired/Homeobox)/Myoblast-Pax7-ChIP-Seq(GSE25064)/Homer	TAATCAATTA	1	-0.009029	1	224	0.0297	2569.5	0.0347
NRF1/Promoter/Homer	STGCGCATGCGC	1	-0.005199	1	439	0.0581	4856.6	0.0656
Arnt:Ahr(bHLH)/MCF7-Arnt-ChIP-Seq(Lo et al.)/Homer	TBGCACGCAA	1	-0.004125	1	1688	0.2235	17542.7	0.2369
GATA-DR8(Zf)/iTreg-Gata3-ChIP-Seq(GSE20898)/Homer	AGATSTNDNNDSAGATAASN	1	-0.003999	1	247	0.0327	2862.3	0.0386
Unknown6/Drosophila-Promoters/Homer	AATTTTAAAA	1	-0.003763	1	2039	0.2699	21059	0.2844
BMAL1(HLH)/Liver-Bmal1-ChIP-Seq(GSE39860)/Homer	GNCACGTG	1	-0.003745	1	4161	0.5508	41976.3	0.5668
Egr1(Zf)/K562-Egr1-ChIP-Seq(GSE32465)/Homer	TGCGTGGGYG	1	-0.003694	1	1998	0.2645	20652.9	0.2789
HOXA2(Homeobox)/mES-Hoxa2-ChIP-Seq(Donaldson et al.)/Homer	GYCATCMATCAT	1	-0.003652	1	301	0.0398	3439.2	0.0464
Pax7-longest(Paired/Homeobox)/Myoblast-Pax7-ChIP-Seq(GSE25064)/Homer	NTAATTDGCYAATTANNWWD	1	-0.001368	1	51	0.0068	746.9	0.0101
p53(p53)/Saos-p53-ChIP-Seq(GSE15780)/Homer	RRCATGYCYRGRCATGYYYN	1	-0.000726	1	313	0.0414	3665	0.0495
p53(p53)/Saos-p53-ChIP-Seq/Homer	RRCATGYCYRGRCATGYYYN	1	-0.000726	1	313	0.0414	3665	0.0495
ARE(NR)/LNCAP-AR-ChIP-Seq(GSE27824)/Homer	RGRACASNSTGTYCYB	1	-0.000144	1	971	0.1285	10634.2	0.1436
SeqBias: TA-repeat	TATATATATA	1	-5.9e-05	1	5011	0.6634	50732.2	0.685
OCT4-SOX2-TCF-NANOG((POU/Homeobox/HMG)/mES-Oct4-ChIP-Seq(GSE11431)/Homer	ATTTGCATAACAATG	1	-1.9e-05	1	424	0.0561	5052.6	0.0682
Unknown4/Arabidopsis-Promoters/Homer	CKTCKTCTTY	1	-3e-06	1	2648	0.3505	27912.3	0.3769
n-Myc(HLH)/mES-nMyc-ChIP-Seq(GSE11431)/Homer	VRCCACGTGG	1	-2e-06	1	1992	0.2637	21381.4	0.2887
SEP3(MADS)/Arabidoposis-Flower-Sep3-ChIP-Seq/Homer	CCAAAAAGGG	1	-1e-06	1	2934	0.3884	30847.3	0.4165
Pho2(bHLH)/Yeast-Pho2-ChIP-Seq(GSE29506)/Homer	CCCACGTGCT	1	0	1	1167	0.1545	13346.8	0.1802
GAGA-repeat/Arabidopsis-Promoters/Homer	CTCTCTCTCY	1	0	1	3527	0.4669	37239.7	0.5028
Max(HLH)/K562-Max-ChIP-Seq(GSE31477)/Homer	RCCACGTGGYYN	1	0	1	1929	0.2554	21692	0.2929
YY1(Zf)/Promoter/Homer	CAAGATGGCGGC	1	0	1	149	0.0197	2520.6	0.034
FOXA1:AR/LNCAP-AR-ChIP-Seq(GSE27824)/Homer	AGTAAACAAAAAAGAACAND	1	0	1	151	0.02	2765.3	0.0373
RARg(NR)/ES-RARg-ChIP-Seq(GSE30538)/Homer	AGGTCAAGGTCA	1	0	1	176	0.0233	4209.1	0.0568
TATA-box/SacCer-Promoters/Homer	BBHWTATATA	1	0	1	1240	0.1642	15805.2	0.2134
c-Myc/mES-cMyc-ChIP-Seq(GSE11431)/Homer	VVCCACGTGG	1	0	1	1497	0.1982	17232.7	0.2327
RLR1?/SacCer-Promoters/Homer	WTTTTCYYTTTT	1	0	1	1575	0.2085	21026.9	0.2839

## Sheet: Ileum UPvsBkgd
TABLE S13: Motif prediction in DHS near genes consistently up or down-regulated in colonized vs. germ-free ileum and colon
Motif Name	Consensus	P-value	Log P-value	q-value (Benjamini)	# of Target Sequences with Motif(of 2776)	% of Target Sequences with Motif	# of Background Sequences with Motif(of 27424)	% of Background Sequences with Motif
CTCF(Zf)/CD4+-CTCF-ChIP-Seq(Barski et al.)/Homer	AYAGTGCCMYCTRGTGGCCA	1e-80	-185.7	0	558	0.201	2158.3	0.0787
BORIS(Zf)/K562-CTCFL-ChIP-Seq(GSE32465)/Homer	CNNBRGCGCCCCCTGSTGGC	1e-50	-116.9	0	612	0.2205	3117.8	0.1137
BATF(bZIP)/Th17-BATF-ChIP-Seq(GSE39756)/Homer	DATGASTCAT	1e-25	-59.53	0	921	0.3318	6524.7	0.2378
AP-1(bZIP)/ThioMac-PU.1-ChIP-Seq(GSE21512)/Homer	VTGACTCATC	1e-24	-57.38	0	1000	0.3602	7278.7	0.2653
Atf3(bZIP)/GBM-ATF3-ChIP-Seq(GSE33912)/Homer	DATGASTCATHN	1e-23	-54.3	0	904	0.3256	6486.6	0.2364
GABPA(ETS)/Jurkat-GABPa-ChIP-Seq(GSE17954)/Homer	RACCGGAAGT	1e-21	-48.47	0	1249	0.4499	9803.1	0.3573
Jun-AP1(bZIP)/K562-cJun-ChIP-Seq(GSE31477)/Homer	GATGASTCATCN	1e-18	-42.01	0	413	0.1488	2557.5	0.0932
EHF(ETS)/LoVo-EHF-ChIP-Seq(GSE49402)/Homer	AVCAGGAAGT	1e-18	-41.75	0	1542	0.5555	12833.7	0.4678
ERG(ETS)/VCaP-ERG-ChIP-Seq(GSE14097)/Homer	ACAGGAAGTG	1e-17	-41.16	0	1727	0.6221	14701.6	0.5359
ELF5(ETS)/T47D-ELF5-ChIP-Seq(GSE30407)/Homer	ACVAGGAAGT	1e-17	-39.92	0	1065	0.3836	8313	0.303
ELF1(ETS)/Jurkat-ELF1-ChIP-Seq(SRA014231)/Homer	AVCCGGAAGT	1e-15	-36.62	0	804	0.2896	6019	0.2194
Fli1(ETS)/CD8-FLI-ChIP-Seq(GSE20898)/Homer	NRYTTCCGGH	1e-15	-35.02	0	1348	0.4856	11150.8	0.4065
Klf4(Zf)/mES-Klf4-ChIP-Seq(GSE11431)/Homer	GCCACACCCA	1e-14	-34.11	0	731	0.2633	5432.3	0.198
EWS:ERG-fusion(ETS)/CADO_ES1-EWS:ERG-ChIP-Seq(SRA014231)/Homer	ATTTCCTGTN	1e-14	-33.86	0	1010	0.3638	7980.4	0.2909
IRF2(IRF)/Erythroblas-IRF2-ChIP-Seq(GSE36985)/Homer	GAAASYGAAASY	1e-14	-33.8	0	200	0.072	1044.2	0.0381
HNF4a(NR/DR1)/HepG2-HNF4a-ChIP-Seq(GSE25021)/Homer	CARRGKBCAAAGTYCA	1e-14	-33.59	0	849	0.3058	6508.2	0.2372
ETV1(ETS)/GIST48-ETV1-ChIP-Seq(GSE22441)/Homer	AACCGGAAGT	1e-14	-33.35	0	1588	0.572	13562.6	0.4944
ISRE(IRF)/ThioMac-LPS-exp(GSE23622)/HOMER	AGTTTCASTTTC	1e-13	-30.47	0	137	0.0494	639	0.0233
EKLF(Zf)/Erythrocyte-Klf1-ChIP-Seq(GSE20478)/Homer	NWGGGTGTGGCY	1e-13	-30.44	0	484	0.1744	3370.8	0.1229
STAT4(Stat)/CD4-Stat4-ChIP-Seq(GSE22104)/Homer	NYTTCCWGGAAR	1e-13	-30.08	0	1185	0.4269	9751.4	0.3555
Elk1(ETS)/Hela-Elk1-ChIP-Seq(GSE31477)/Homer	HACTTCCGGY	1e-12	-28.7	0	812	0.2925	6316.6	0.2303
IRF1(IRF)/PBMC-IRF1-ChIP-Seq(GSE43036)/Homer	GAAAGTGAAAGT	1e-12	-28.63	0	258	0.0929	1553.6	0.0566
Gata1(Zf)/K562-GATA1-ChIP-Seq(GSE18829)/Homer	SAGATAAGRV	1e-12	-28.07	0	798	0.2875	6208.8	0.2263
NFkB-p65-Rel(RHD)/LPS-exp(GSE23622)/Homer	GGAAATTCCC	1e-11	-27.26	0	138	0.0497	679.8	0.0248
ETS1(ETS)/Jurkat-ETS1-ChIP-Seq(GSE17954)/Homer	ACAGGAAGTG	1e-11	-27.21	0	1306	0.4705	11017.5	0.4016
ETS(ETS)/Promoter/Homer	AACCGGAAGT	1e-10	-25.22	0	540	0.1945	3984.8	0.1453
STAT1(Stat)/HelaS3-STAT1-ChIP-Seq(GSE12782)/Homer	NATTTCCNGGAAAT	1e-10	-24.46	0	478	0.1722	3464.1	0.1263
PU.1(ETS)/ThioMac-PU.1-ChIP-Seq(GSE21512)/Homer	AGAGGAAGTG	1e-10	-24.37	0	798	0.2875	6328	0.2307
EWS:FLI1-fusion(ETS)/SK_N_MC-EWS:FLI1-ChIP-Seq(SRA014231)/Homer	VACAGGAAAT	1e-10	-23.78	0	865	0.3116	6965.6	0.2539
Sp1(Zf)/Promoter/Homer	GGCCCCGCCCCC	1e-10	-23.63	0	393	0.1416	2756.3	0.1005
Gata2(Zf)/K562-GATA2-ChIP-Seq(GSE18829)/Homer	BBCTTATCTS	1e-10	-23.35	0	856	0.3084	6897.7	0.2514
Elk4(ETS)/Hela-Elk4-ChIP-Seq(GSE31477)/Homer	NRYTTCCGGY	1e-10	-23.13	0	768	0.2767	6094.6	0.2222
Stat3(Stat)/mES-Stat3-ChIP-Seq(GSE11431)/Homer	CTTCCGGGAA	1e-09	-22.65	0	758	0.2731	6019.8	0.2194
NF1(CTF)/LNCAP-NF1-ChIP-Seq(Unpublished)/Homer	CYTGGCABNSTGCCAR	1e-09	-22.46	0	658	0.237	5117	0.1865
STAT5(Stat)/mCD4+-Stat5-ChIP-Seq(GSE12346)/Homer	RTTTCTNAGAAA	1e-09	-21.79	0	538	0.1938	4064.3	0.1482
Ets1-distal(ETS)/CD4+-PolII-ChIP-Seq(Barski et al.)/Homer	MACAGGAAGT	1e-09	-21.44	0	550	0.1981	4181.4	0.1524
Gata4(Zf)/Heart-Gata4-ChIP-Seq(GSE35151)/Homer	NBWGATAAGR	1e-08	-20.61	0	1169	0.4211	9959.1	0.363
KLF5(Zf)/LoVo-KLF5-ChIP-Seq(GSE49402)/Homer	DGGGYGKGGC	1e-08	-20.23	0	1467	0.5285	12876.2	0.4694
PQM-1(?)/cElegans-L3-ChIP-Seq(modEncode)/Homer	ACTGATAAGA	1e-08	-18.9	0	513	0.1848	3932	0.1433
PPARE(NR/DR1)/3T3L1-Pparg-ChIP-Seq(GSE13511)/Homer	TGACCTTTGCCCCA	1e-08	-18.9	0	1282	0.4618	11126.3	0.4056
NFkB-p65(RHD)/GM12787-p65-ChIP-Seq(GSE19485)/Homer	WGGGGATTTCCC	1e-08	-18.88	0	748	0.2695	6063.3	0.221
GATA3(Zf)/iTreg-Gata3-ChIP-Seq(GSE20898)/Homer	AGATAASR	1e-07	-18.22	0	1490	0.5367	13196.5	0.481
Stat3+il21(Stat)/CD4-Stat3-ChIP-Seq(GSE19198)/Homer	SVYTTCCNGGAARB	1e-07	-17.7	0	968	0.3487	8168.8	0.2978
HOXA9(Homeobox)/HSC-Hoxa9-ChIP-Seq(GSE33509)/Homer	GGCCATAAATCA	1e-07	-17.07	0	787	0.2835	6497	0.2368
Rbpj1(?)/Panc1-Rbpj1-ChIP-Seq(GSE47459)/Homer	HTTTCCCASG	1e-06	-15.87	0	1574	0.567	14145.5	0.5156
caudal(Homeobox)/Drosophila-Embryos-ChIP-Chip(modEncode)/Homer	GGYCATAAAW	1e-06	-15.43	0	896	0.3228	7589.3	0.2766
BMYB(HTH)/Hela-BMYB-ChIPSeq(GSE27030)/Homer	NHAACBGYYV	1e-06	-15.41	0	1468	0.5288	13118.6	0.4782
Foxo1(Forkhead)/RAW-Foxo1-ChIP-Seq(Fan et al.)/Homer	CTGTTTAC	1e-06	-14.06	0	1735	0.625	15852.4	0.5778
STAT6(Stat)/CD4-Stat6-ChIP-Seq(GSE22104)/Homer	ABTTCYYRRGAA	1e-06	-13.83	0	685	0.2468	5686.3	0.2073
Tbet(T-box)/CD8-Tbet-ChIP-Seq(GSE33802)/Homer	AGGTGTGAAM	1e-05	-13.64	0	1196	0.4308	10551.9	0.3846
TR4(NR/DR1)/Hela-TR4-ChIP-Seq(GSE24685)/Homer	GAGGTCAAAGGTCA	1e-05	-13.63	0	266	0.0958	1929.8	0.0703
Nur77(NR)/K562-NR4A1-ChIP-Seq(GSE31363)/Homer	TGACCTTTNCNT	1e-05	-13.54	0	298	0.1073	2207.6	0.0805
Isl1(Homeobox)/Neuron-Isl1-ChIP-Seq(GSE31456)/Homer	CTAATKGV	1e-05	-13.53	0	1717	0.6185	15700.6	0.5723
RXR(NR/DR1)/3T3L1-RXR-ChIP-Seq(GSE13511)/Homer	TAGGGCAAAGGTCA	1e-05	-13.27	0	1368	0.4928	12249.1	0.4465
EBF(EBF)/proBcell-EBF-ChIP-Seq(GSE21978)/Homer	DGTCCCYRGGGA	1e-05	-13.05	0	413	0.1488	3236.6	0.118
STAT6/Macrophage-Stat6-ChIP-Seq(GSE38377)/Homer	TTCCKNAGAA	1e-05	-12.96	0	716	0.2579	6014.7	0.2192
Eomes(T-box)/H9-Eomes-ChIP-Seq(GSE26097)/Homer	ATTAACACCT	1e-05	-12.74	0	1799	0.6481	16571.5	0.6041
Bach2(bZIP)/OCILy7-Bach2-ChIP-Seq(GSE44420)/Homer	TGCTGAGTCA	1e-05	-12.58	0	308	0.111	2324	0.0847
E2F4(E2F)/K562-E2F4-ChIP-Seq(GSE31477)/Homer	GGCGGGAAAH	0.0001	-11.28	0.0001	450	0.1621	3637.1	0.1326
Usf2(HLH)/C2C12-Usf2-ChIP-Seq(GSE36030)/Homer	GTCACGTGGT	0.0001	-11.11	0.0001	440	0.1585	3553.8	0.1295
Unknown5/Drosophila-Promoters/Homer	GCTGATAASV	0.0001	-10.74	0.0001	764	0.2752	6575	0.2397
SUT1?/SacCer-Promoters/Homer	CCCCGCGC	0.0001	-10.29	0.0002	2423	0.8728	23172.4	0.8447
NF-E2(bZIP)/K562-NFE2-ChIP-Seq(GSE31477)/Homer	GATGACTCAGCA	0.0001	-9.93	0.0002	114	0.0411	748.2	0.0273
ETS:RUNX/Jurkat-RUNX1-ChIP-Seq(GSE17954)/Homer	RCAGGATGTGGT	0.0001	-9.498	0.0004	174	0.0627	1257.1	0.0458
MyoG(HLH)/C2C12-MyoG-ChIP-Seq(GSE36024)/Homer	AACAGCTG	0.0001	-9.312	0.0004	1236	0.4452	11199.6	0.4082
NF1-halfsite(CTF)/LNCaP-NF1-ChIP-Seq(Unpublished)/Homer	YTGCCAAG	0.0001	-9.216	0.0005	1650	0.5944	15294.3	0.5575
PU.1-IRF(ETS:IRF)/Bcell-PU.1-ChIP-Seq(GSE21512)/Homer	MGGAAGTGAAAC	0.001	-9.142	0.0005	1439	0.5184	13204.5	0.4813
Tbx5(T-box)/HL1-Tbx5.biotin-ChIP-Seq(GSE21529)/Homer	AGGTGTCA	0.001	-9.14	0.0005	2171	0.7821	20587.1	0.7504
Unknown1(NR/Ini-like)/Drosophila-Promoters/Homer	MYGGTCACACTG	0.001	-9.043	0.0005	332	0.1196	2661.7	0.097
Nkx6.1(Homeobox)/Islet-Nkx6.1-ChIP-Seq(GSE40975)/Homer	GKTAATGR	0.001	-8.563	0.0008	1883	0.6783	17681.2	0.6445
HRE(HSF)/Striatum-HSF1-ChIP-Seq(GSE38000)/Homer	TTCTAGAABNTTCTA	0.001	-8.457	0.0009	372	0.134	3048.5	0.1111
Erra(NR)/HepG2-Erra-ChIP-Seq(GSE31477)/Homer	CAAAGGTCAG	0.001	-8.447	0.0009	1915	0.6898	18013.1	0.6566
Atf1(bZIP)/K562-ATF1-ChIP-Seq(GSE31477)/Homer	GATGACGTCA	0.001	-8.395	0.0009	745	0.2684	6529.5	0.238
Bcl6(Zf)/Liver-Bcl6-ChIP-Seq(GSE31578)/Homer	NNNCTTTCCAGGAAA	0.001	-8.252	0.0011	1468	0.5288	13554.8	0.4941
ELT-3(Gata)/cElegans-L1-ELT3-ChIP-Seq(modEncode)/Homer	AWTGATAAGA	0.001	-8.226	0.0011	530	0.1909	4516.9	0.1647
CEBP:AP1(bZIP)/ThioMac-CEBPb-ChIP-Seq(GSE21512)/Homer	DRTGTTGCAA	0.001	-7.961	0.0014	793	0.2857	7013.5	0.2557
E2F1(E2F)/Hela-E2F1-ChIP-Seq(GSE22478)/Homer	CWGGCGGGAA	0.001	-7.812	0.0016	259	0.0933	2055.6	0.0749
Reverb(NR/DR2)/BLRP(RAW)-Reverba-ChIP-Seq(GSE45914)/Homer	GTRGGTCASTGGGTCA	0.001	-7.769	0.0016	274	0.0987	2191.5	0.0799
HRE(HSF)/HepG2-HSF1-ChIP-Seq(GSE31477)/Homer	BSTTCTRGAABVTTCYAGAA	0.001	-7.578	0.002	299	0.1077	2424.5	0.0884
NFAT:AP1/Jurkat-NFATC1-ChIP-Seq(Jolma et al.)/Homer	SARTGGAAAAWRTGAGTCAB	0.001	-7.574	0.002	248	0.0893	1966.2	0.0717
FXR(NR/IR1)/Liver-FXR-ChIP-Seq(Chong et al.)/Homer	AGGTCANTGACCTB	0.001	-7.534	0.002	603	0.2172	5239.2	0.191
Initiator/Drosophila-Promoters/Homer	NTCAGTYG	0.001	-7.533	0.002	1904	0.6859	17967.8	0.655
SPDEF(ETS)/VCaP-SPDEF-ChIP-Seq(SRA014231)/Homer	ASWTCCTGBT	0.001	-7.504	0.002	1236	0.4452	11329	0.413
AMYB(HTH)/Testes-AMYB-ChIP-Seq(GSE44588)/Homer	TGGCAGTTGG	0.001	-7.375	0.0023	1472	0.5303	13660.8	0.498
Tcf12(HLH)/GM12878-Tcf12-ChIP-Seq(GSE32465)/Homer	VCAGCTGYTG	0.001	-7.216	0.0026	1143	0.4117	10442.6	0.3806
Cbf1(bHLH)/Yeast-Cbf1-ChIP-Seq(GSE29506)/Homer	TCACGTGAYH	0.001	-7.002	0.0032	358	0.129	2988.9	0.109
c-Myc(HLH)/LNCAP-cMyc-ChIP-Seq(unpublished)/Homer	VCCACGTG	0.01	-6.704	0.0043	533	0.192	4631.3	0.1688
CLOCK(HLH)/Liver-Clock-ChIP-Seq(GSE39860)/Homer	GHCACGTG	0.01	-6.666	0.0044	690	0.2486	6118.4	0.223
TEAD(TEA)/Fibroblast-PU.1-ChIP-Seq(Unpublished)/Homer	YCWGGAATGY	0.01	-6.623	0.0045	775	0.2792	6932.4	0.2527
CRE(bZIP)/Promoter/Homer	CSGTGACGTCAC	0.01	-6.606	0.0046	273	0.0983	2231.2	0.0813
Hnf1(Homeobox)/Liver-Foxa2-Chip-Seq(GSE25694)/Homer	GGTTAAWCATTAA	0.01	-6.514	0.0049	164	0.0591	1261.3	0.046
Unknown(Homeobox)/Limb-p300-ChIP-Seq/Homer	SSCMATWAAA	0.01	-6.507	0.0049	746	0.2687	6663.3	0.2429
VDR(NR/DR3)/GM10855-VDR+vitD-ChIP-Seq(GSE22484)/Homer	ARAGGTCANWGAGTTCANNN	0.01	-6.441	0.0052	370	0.1333	3127.1	0.114
Tbx20(T-box)/Heart-Tbx20-ChIP-Seq(GSE29636)/Homer	GGTGYTGACAGS	0.01	-6.394	0.0054	350	0.1261	2946	0.1074
T1ISRE(IRF)/Ifnb-Exp/Homer	ACTTTCGTTTCT	0.01	-6.296	0.0059	31	0.0112	164.1	0.006
Tlx?(NR)/NPC-H3K4me1-ChIP-Seq(GSE16256)/Homer	CTGGCAGSCTGCCA	0.01	-6.288	0.0059	680	0.245	6049.8	0.2205
Cdx2(Homeobox)/mES-Cdx2-ChIP-Seq(GSE14586)/Homer	GYMATAAAAH	0.01	-6.286	0.0059	769	0.277	6899.4	0.2515
Lhx3(Homeobox)/Neuron-Lhx3-ChIP-Seq(GSE31456)/Homer	ADBTAATTAR	0.01	-6.09	0.007	1453	0.5234	13578.5	0.495
c-Jun-CRE(bZIP)/K562-cJun-ChIP-Seq(GSE31477)/Homer	ATGACGTCATCY	0.01	-5.995	0.0076	388	0.1398	3318.8	0.121
Bach1(bZIP)/K562-Bach1-ChIP-Seq(GSE31477)/Homer	AWWNTGCTGAGTCAT	0.01	-5.993	0.0076	94	0.0339	673.7	0.0246
SeqBias: CG bias	SSSSSSSSSS	0.01	-5.829	0.0088	2571	0.9262	24984.7	0.9107
NFkB-p50,p52(RHD)/p50-ChIP-Chip(Schreiber et al.)/Homer	GGGGGAATCCCC	0.01	-5.728	0.0097	207	0.0746	1673.4	0.061
Unknown-ESC-element/mES-Nanog-ChIP-Seq(GSE11724)/Homer	CACAGCAGGGGG	0.01	-5.704	0.0098	818	0.2947	7414.7	0.2703
TRa(NR)/C17.2-TRa-ChIP-Seq(GSE38347)/Homer	GGTCANYTGAGGWCA	0.01	-5.67	0.01	645	0.2323	5760.8	0.21
Atf4(bZIP)/MEF-Atf4-ChIP-Seq(GSE35681)/Homer	MTGATGCAAT	0.01	-5.621	0.0104	279	0.1005	2332.4	0.085
USF1(HLH)/GM12878-Usf1-ChIP-Seq(GSE32465)/Homer	SGTCACGTGR	0.01	-5.559	0.011	580	0.2089	5150.2	0.1877
Hoxc9(Homeobox)/Ainv15-Hoxc9-ChIP-Seq(GSE21812)/Homer	GGCCATAAATCA	0.01	-5.523	0.0113	556	0.2003	4925.2	0.1795
Atoh1(bHLH)/Cerebellum-Atoh1-ChIP-Seq(GSE22111)/Homer	VNRVCAGCTGGY	0.01	-5.214	0.0153	1255	0.4521	11707.3	0.4267
Lhx2(Homeobox)/HFSC-Lhx2-ChIP-Seq(GSE48068)/Homer	TAATTAGN	0.01	-5.199	0.0153	1053	0.3793	9733.6	0.3548
NeuroD1(bHLH)/Islet-NeuroD1-ChIP-Seq(GSE30298)/Homer	GCCATCTGTT	0.01	-5.187	0.0154	1065	0.3836	9851.4	0.3591
Ap4(HLH)/AML-Tfap4-ChIP-Seq(GSE45738)/Homer	NAHCAGCTGD	0.01	-5.172	0.0155	1313	0.473	12281.6	0.4477
Maz(Zf)/HepG2-Maz-ChIP-Seq(GSE31477)/Homer	GGGGGGGG	0.01	-5.151	0.0157	1402	0.505	13160	0.4797
Tcfcp2l1(CP2)/mES-Tcfcp2l1-ChIP-Seq(GSE11431)/Homer	NRAACCRGTTYRAACCRGYT	0.01	-5.107	0.0162	272	0.098	2294.7	0.0836
CHR/Cell-Cycle-Exp/Homer	SRGTTTCAAA	0.01	-5.078	0.0166	649	0.2338	5843.8	0.213
Tbox:Smad/ESCd5-Smad2_3-ChIP-Seq(GSE29422)/Homer	AGGTGHCAGACA	0.01	-4.991	0.0179	327	0.1178	2809.8	0.1024
ZBTB33(Zf)/GM12878-ZBTB33-ChIP-Seq(GSE32465)/Homer	GGVTCTCGCGAGAAC	0.01	-4.986	0.0179	36	0.013	220.1	0.008
E-box/Arabidopsis-Promoters/Homer	GCCACGTG	0.01	-4.939	0.0186	523	0.1884	4654.9	0.1697
Pdx1(Homeobox)/Islet-Pdx1-ChIP-Seq(SRA008281)/Homer	YCATYAATCA	0.01	-4.921	0.0187	981	0.3534	9058.3	0.3302
IRF4(IRF)/GM12878-IRF4-ChIP-Seq(GSE32465)/Homer	ACTGAAACCA	0.01	-4.909	0.0188	549	0.1978	4903.3	0.1787
CEBP(bZIP)/CEBPb-ChIP-Seq(GSE21512)/Homer	ATTGCGCAAC	0.01	-4.777	0.0213	647	0.2331	5848.3	0.2132
E2A(HLH)/proBcell-E2A-ChIP-Seq(GSE21978)/Homer	DNRCAGCTGY	0.01	-4.761	0.0214	1483	0.5342	13999.6	0.5103
E-box(HLH)/Promoter/Homer	SSGGTCACGTGA	0.01	-4.752	0.0215	108	0.0389	830.1	0.0303
Foxa2(Forkhead)/Liver-Foxa2-ChIP-Seq(GSE25694)/Homer	CYTGTTTACWYW	0.01	-4.737	0.0216	906	0.3264	8347.6	0.3043
E2F7(E2F)/Hela-E2F7-ChIP-Seq(GSE32673)/Homer	VDTTTCCCGCCA	0.01	-4.712	0.022	132	0.0476	1043.4	0.038
GFX(?)/Promoter/Homer	ATTCTCGCGAGA	0.01	-4.608	0.0242	12	0.0043	50.4	0.0018
MYB(HTH)/ERMYB-Myb-ChIPSeq(GSE22095)/Homer	GGCVGTTR	0.1	-4.585	0.0245	1574	0.567	14919.4	0.5438
Nrf2(bZIP)/Lymphoblast-Nrf2-ChIP-Seq(GSE37589)/Homer	HTGCTGAGTCAT	0.1	-4.51	0.0263	84	0.0303	630	0.023
Chop(bZIP)/MEF-Chop-ChIP-Seq(GSE35681)/Homer	ATTGCATCAT	0.1	-4.417	0.0286	219	0.0789	1843.4	0.0672
NFAT(RHD)/Jurkat-NFATC1-ChIP-Seq(Jolma et al.)/Homer	ATTTTCCATT	0.1	-4.38	0.0294	954	0.3437	8847.2	0.3225
E2F6(E2F)/Hela-E2F6-ChIP-Seq(GSE31477)/Homer	GGCGGGAARN	0.1	-4.308	0.0314	553	0.1992	4988.8	0.1819
MyoD(HLH)/Myotube-MyoD-ChIP-Seq(GSE21614)/Homer	RRCAGCTGYTSY	0.1	-4.302	0.0314	935	0.3368	8670.6	0.3161
JunD(bZIP)/K562-JunD-ChIP-Seq/Homer	ATGACGTCATCN	0.1	-4.164	0.0357	122	0.0439	975.3	0.0356
Fox:Ebox(Forkhead:HLH)/Panc1-Foxa2-ChIP-Seq(GSE47459)/Homer	NNNVCTGWGYAAACASN	0.1	-4.054	0.0395	1140	0.4107	10696.9	0.3899
Ptf1a(HLH)/Panc1-Ptf1a-ChIP-Seq(GSE47459)/Homer	ACAGCTGTTN	0.1	-4	0.0414	1995	0.7187	19189.5	0.6995
Unknown3/Arabidopsis-Promoters/Homer	AYTAAACCGG	0.1	-3.933	0.044	206	0.0742	1749.1	0.0638
Myf5(bHLH)/GM-Myf5-ChIP-Seq(GSE24852)/Homer	BAACAGCTGT	0.1	-3.927	0.044	878	0.3163	8154.8	0.2973
CArG(MADS)/PUER-Srf-ChIP-Seq(Sullivan et al.)/Homer	CCATATATGGNM	0.1	-3.828	0.0481	420	0.1513	3761.2	0.1371
HLH-1(bHLH)/cElegans-Embryo-HLH1-ChIP-Seq(modEncode)/Homer	RACAGCTGTTBH	0.1	-3.807	0.0488	953	0.3433	8896.7	0.3243
Pho4(bHLH)/Yeast-Pho4-ChIP-Seq(GSE29506)/Homer	AAGCACGTGBGD	0.1	-3.739	0.0518	263	0.0947	2289.6	0.0835
AARE(HLH)/mES-cMyc-ChIP-Seq/Homer	GATTGCATCA	0.1	-3.593	0.0596	89	0.0321	703.1	0.0256
PAX5-shortForm(Paired/Homeobox)/GM12878-PAX5-ChIP-Seq(GSE32465)/Homer	GTCACGCTCSCTGM	0.1	-3.38	0.0732	178	0.0641	1521.8	0.0555
SCL(HLH)/HPC7-Scl-ChIP-Seq(GSE13511)/Homer	AVCAGCTG	0.1	-3.297	0.0789	2359	0.8498	22949.7	0.8366
Srebp2(HLH)/HepG2-Srebp2-ChIP-Seq(GSE31477)/Homer	CGGTCACSCCAC	0.1	-3.261	0.0813	226	0.0814	1974.4	0.072
CTCF-SatelliteElement/CD4+-CTCF-ChIP-Seq(Barski et al.)/Homer	TGCAGTTCCMVNWRTGGCCA	0.1	-3.197	0.0861	43	0.0155	314.2	0.0115
Esrrb(NR)/mES-Esrrb-ChIP-Seq(GSE11431)/Homer	KTGACCTTGA	0.1	-3.168	0.0879	866	0.312	8120.2	0.296
Tcf3(HMG)/mES-Tcf3-ChIP-Seq(GSE11724)/Homer	ASWTCAAAGG	0.1	-2.991	0.1042	368	0.1326	3335.5	0.1216
ZNF143|STAF(Zf)/CUTLL-ZNF143-ChIP-Seq(GSE29600)/Homer	ATTTCCCAGVAKSCY	0.1	-2.841	0.1203	594	0.214	5519.7	0.2012
X-box(HTH)/NPC-H3K4me1-ChIP-Seq(GSE16256)/Homer	GGTTGCCATGGCAA	0.1	-2.776	0.1276	173	0.0623	1510.8	0.0551
RUNX-AML(Runt)/CD4+-PolII-ChIP-Seq(Barski et al.)/Homer	GCTGTGGTTW	0.1	-2.751	0.1298	902	0.3249	8522.5	0.3107
Smad3(MAD)/NPC-Smad3-ChIP-Seq(GSE36673)/Homer	TWGTCTGV	0.1	-2.547	0.1582	2082	0.75	20230.6	0.7374
Unknown3/Drosophila-Promoters/Homer	ACVAKCTGGCAGCGC	0.1	-2.53	0.1598	128	0.0461	1106.2	0.0403
Sox3(HMG)/NPC-Sox3-ChIP-Seq(GSE33059)/Homer	CCWTTGTY	0.1	-2.517	0.1609	1552	0.5591	14951.7	0.545
AP-2gamma(AP2)/MCF7-TFAP2C-ChIP-Seq(GSE21234)/Homer	SCCTSAGGSCAW	0.1	-2.503	0.1621	1137	0.4096	10858.6	0.3958
SeqBias: C/A-bias	MMMMMMMMMM	0.1	-2.499	0.1621	2759	0.9939	27191.2	0.9912
GATA:SCL/Ter119-SCL-ChIP-Seq(GSE18720)/Homer	CRGCTGBNGNSNNSAGATAA	0.1	-2.478	0.164	180	0.0648	1595.7	0.0582
LXRE(NR/DR4)/BLRP(RAW)-LXRb-ChIP-Seq(GSE21512)/Homer	RGGTTACTANAGGTCA	0.1	-2.477	0.164	88	0.0317	740.7	0.027
GEI-11(Myb?)/cElegans-L4-GEI11-ChIP-Seq(modEncode)/Homer	CCGACAYYTYACGGG	0.1	-2.425	0.1707	64	0.0231	524.3	0.0191
EBF1(EBF)/Near-E2A-ChIP-Seq(GSE21512)/Homer	GTCCCCWGGGGA	0.1	-2.398	0.1744	1219	0.4391	11680.9	0.4258
RUNX(Runt)/HPC7-Runx1-ChIP-Seq(GSE22178)/Homer	SAAACCACAG	0.1	-2.366	0.1789	884	0.3184	8398.7	0.3061
TATA-Box(TBP)/Promoter/Homer	CCTTTTAWAGSC	0.1	-2.333	0.1837	1292	0.4654	12409.3	0.4523
RFX(HTH)/K562-RFX3-ChIP-Seq(SRA012198)/Homer	CGGTTGCCATGGCAAC	1	-2.276	0.1933	131	0.0472	1149.7	0.0419
CEBP:CEBP(bZIP)/MEF-Chop-ChIP-Seq(GSE35681)/Homer	NTNATGCAAYMNNHTGMAAY	1	-2.221	0.2029	146	0.0526	1293.5	0.0471
Pbx3(Homeobox)/GM12878-PBX3-ChIP-Seq(GSE32465)/Homer	SCTGTCAMTCAN	1	-2.21	0.2039	383	0.138	3553.5	0.1295
GRHL2(CP2)/HBE-GRHL2-ChIP-Seq(GSE46194)/Homer	AAACYKGTTWDACMRGTTTB	1	-2.194	0.2059	491	0.1769	4597.6	0.1676
GFY(?)/Promoter/Homer	ACTACAATTCCC	1	-2.167	0.2104	98	0.0353	848.1	0.0309
Smad4(MAD)/ESC-SMAD4-ChIP-Seq(GSE29422)/Homer	VBSYGTCTGG	1	-2.163	0.2104	1578	0.5684	15263.5	0.5564
PBX1(Homeobox)/MCF7-PBX1-ChIP-Seq(GSE28007)/Homer	GSCTGTCACTCA	1	-2.142	0.213	150	0.054	1336.7	0.0487
Six1(Homeobox)/Myoblast-Six1-ChIP-Chip(GSE20150)/Homer	GKVTCADRTTWC	1	-2.138	0.213	320	0.1153	2955.7	0.1077
PR(NR)/T47D-PR-ChIP-Seq(GSE31130)/Homer	VAGRACAKNCTGTBC	1	-2.129	0.2134	1840	0.6628	17871.1	0.6514
E-box/Drosophila-Promoters/Homer	AACAGCTGTTHN	1	-2.064	0.2262	350	0.1261	3251.4	0.1185
GRE/RAW264.7-GRE-ChIP-Seq(Unpublished)/Homer	VAGRACAKWCTGTYC	1	-2.028	0.2331	318	0.1146	2947.6	0.1074
AP-2alpha(AP2)/Hela-AP2alpha-ChIP-Seq(GSE31477)/Homer	ATGCCCTGAGGC	1	-2.019	0.234	945	0.3404	9047.4	0.3298
SeqBias: GA-repeat	GAGAGAGAGA	1	-2.008	0.2352	2573	0.9269	25259.7	0.9208
FOXP1(Forkhead)/H9-FOXP1-ChIP-Seq(GSE31006)/Homer	NYYTGTTTACHN	1	-2.005	0.2352	515	0.1855	4853.4	0.1769
TEAD4(TEA)/Tropoblast-Tead4-ChIP-Seq(GSE37350)/Homer	CCWGGAATGY	1	-2.002	0.2352	948	0.3415	9079.8	0.331
p53(p53)/mES-cMyc-ChIP-Seq(GSE11431)/Homer	ACATGCCCGGGCAT	1	-1.986	0.2363	31	0.0112	244.6	0.0089
HNF6(Homeobox)/Liver-Hnf6-ChIP-Seq(ERP000394)/Homer	NTATYGATCH	1	-1.982	0.2363	560	0.2017	5293.8	0.193
TCFL2(HMG)/K562-TCF7L2-ChIP-Seq(GSE29196)/Homer	ACWTCAAAGG	1	-1.976	0.2363	137	0.0494	1225	0.0447
Unknown4/Drosophila-Promoters/Homer	AAAAATACCRMA	1	-1.952	0.2404	111	0.04	982.9	0.0358
Srebp1a(HLH)/HepG2-Srebp1a-ChIP-Seq(GSE31477)/Homer	RTCACSCCAY	1	-1.935	0.2432	307	0.1106	2851.1	0.1039
MafA(bZIP)/Islet-MafA-ChIP-Seq(GSE30298)/Homer	TGCTGACTCA	1	-1.86	0.2605	998	0.3595	9593	0.3497
Unknown1/Arabidopsis-Promoters/Homer	RGGGTAWWWTHGTAA	1	-1.838	0.2651	124	0.0447	1112.7	0.0406
Olig2(bHLH)/Neuron-Olig2-ChIP-Seq(GSE30882)/Homer	RCCATMTGTT	1	-1.823	0.2676	1717	0.6185	16699	0.6087
Tcf4(HMG)/Hct116-Tcf4-ChIP-Seq(SRA012054)/Homer	ASATCAAAGGVA	1	-1.82	0.2676	592	0.2133	5627.1	0.2051
SeqBias: polyC-repeat	CCCCCCCCCC	1	-1.817	0.2676	2739	0.9867	26995.3	0.984
GATA-IR4(Zf)/iTreg-Gata3-ChIP-Seq(GSE20898)/Homer	NAGATWNBNATCTNN	1	-1.794	0.271	85	0.0306	748.6	0.0273
Nanog(Homeobox)/mES-Nanog-ChIP-Seq(GSE11724)/Homer	RGCCATTAAC	1	-1.768	0.2764	2311	0.8325	22635.6	0.8251
RUNX1(Runt)/Jurkat-RUNX1-ChIP-Seq(GSE29180)/Homer	AAACCACARM	1	-1.761	0.2771	1151	0.4146	11115.9	0.4052
Egr2/Thymocytes-Egr2-ChIP-Seq(GSE34254)/Homer	NGCGTGGGCGGR	1	-1.75	0.2787	274	0.0987	2553.2	0.0931
AR-halfsite(NR)/LNCaP-AR-ChIP-Seq(GSE27824)/Homer	CCAGGAACAG	1	-1.718	0.2861	2279	0.821	22321.7	0.8137
FHY3(FAR1)/Arabidopsis-FHY3-ChIP-Seq(GSE30711)/Homer	HHCACGCGCBTN	1	-1.686	0.294	271	0.0976	2531.1	0.0923
E2A-nearPU.1(HLH)/Bcell-PU.1-ChIP-Seq(GSE21512)/Homer	NVCACCTGBN	1	-1.664	0.2988	1489	0.5364	14469.4	0.5274
EBNA1(EBV virus)/Raji-EBNA1-ChIP-Seq(GSE30709)/Homer	GGYAGCAYDTGCTDCCCNNN	1	-1.621	0.3105	26	0.0094	211.2	0.0077
Gfi1b(Zf)/HPC7-Gfi1b-ChIP-Seq(GSE22178)/Homer	MAATCACTGC	1	-1.604	0.3139	720	0.2594	6911.7	0.2519
Rfx2(HTH)/LoVo-RFX2-ChIP-Seq(GSE49402)/Homer	GTTGCCATGGCAACM	1	-1.557	0.3275	141	0.0508	1295.3	0.0472
Sox2(HMG)/mES-Sox2-ChIP-Seq(GSE11431)/Homer	BCCATTGTTC	1	-1.554	0.3275	962	0.3465	9294.6	0.3388
SeqBias: A/T bias	WWWWWWWWWW	1	-1.552	0.3275	2718	0.9791	26788.5	0.9765
E2F(E2F)/Cell-Cycle-Exp/Homer	TTSGCGCGAAAA	1	-1.512	0.3374	55	0.0198	483.2	0.0176
Sox6(HMG)/Myotubes-Sox6-ChIP-Seq(GSE32627)/Homer	CCATTGTTNY	1	-1.507	0.3374	1427	0.514	13887.5	0.5062
Hoxb4(Homeobox)/ES-Hoxb4-ChIP-Seq(GSE34014)/Homer	TGATTRATGGCY	1	-1.421	0.366	241	0.0868	2271.5	0.0828
MafK(bZIP)/C2C12-MafK-ChIP-Seq(GSE36030)/Homer	GCTGASTCAGCA	1	-1.415	0.3663	337	0.1214	3203.7	0.1168
DPL-1(E2F)/cElegans-Adult-ChIP-Seq(modEncode)/Homer	TAGCGCGC	1	-1.408	0.3668	502	0.1808	4812	0.1754
p63(p53)/Keratinocyte-p63-ChIP-Seq(GSE17611)/Homer	NNDRCATGYCYNRRCATGYH	1	-1.389	0.3723	490	0.1765	4698.1	0.1713
SeqBias: G/A bias	RRRRRRRRRR	1	-1.378	0.3742	2761	0.9946	27249.4	0.9933
Nkx2.5(Homeobox)/HL1-Nkx2.5.biotin-ChIP-Seq(GSE21529)/Homer	RRSCACTYAA	1	-1.366	0.377	1836	0.6614	17967.7	0.655
REB1/SacCer-Promoters/Homer	KCCGGGTAAYRR	1	-1.346	0.3829	218	0.0785	2057.3	0.075
bHLHE40(HLH)/HepG2-BHLHE40-ChIP-Seq(GSE31477)/Homer	KCACGTGMCN	1	-1.315	0.3932	372	0.134	3558.8	0.1297
Ik-1	NHTTGGGAATRCC	1	-1.312	0.3932	2769	0.9975	27338.9	0.9966
PRDM14(Zf)/H1-PRDM14-ChIP-Seq(GSE22767)/Homer	RGGTCTCTAACY	1	-1.292	0.3981	485	0.1747	4665.5	0.1701
SeqBias: polyA-repeat	AAAAAAAAAA	1	-1.262	0.4085	2765	0.996	27296	0.995
Znf263(Zf)/K562-Znf263-ChIP-Seq(GSE31477)/Homer	CVGTSCTCCC	1	-1.232	0.4191	1627	0.5861	15925.3	0.5805
REST-NRSF(Zf)/Jurkat-NRSF-ChIP-Seq/Homer	GGMGCTGTCCATGGTGCTGA	1	-1.219	0.4223	15	0.0054	124.8	0.0045
GRE(NR/IR3)/A549-GR-ChIP-Seq(GSE32465)/Homer	NRGVACABNVTGTYCY	1	-1.211	0.4238	184	0.0663	1743.3	0.0635
TOD6?/SacCer-Promoters/Homer	GCGATGAGMT	1	-1.198	0.4274	235	0.0847	2240.2	0.0817
Oct4:Sox17/F9-Sox17-ChIP-Seq(GSE44553)/Homer	CCATTGTATGCAAAT	1	-1.099	0.4695	152	0.0548	1445.6	0.0527
Nkx2.1(Homeobox)/LungAC-Nkx2.1-ChIP-Seq(GSE43252)/Homer	RSCACTYRAG	1	-1.079	0.477	2051	0.7388	20163.8	0.735
SeqBias: GCW-triplet	GCWGCWGCWGCW	1	-1.069	0.4793	2753	0.9917	27178.7	0.9907
Nkx3.1(Homeobox)/LNCaP-Nkx3.1-ChIP-Seq(GSE28264)/Homer	AAGCACTTAA	1	-1.023	0.4996	1853	0.6675	18213.1	0.6639
Unknown2/Drosophila-Promoters/Homer	CATCMCTA	1	-1.018	0.4997	1338	0.482	13120.5	0.4783
HIF2a(HLH)/785_O-HIF2a-ChIP-Seq(GSE34871)/Homer	GCACGTACCC	1	-0.9959	0.5088	383	0.138	3718.9	0.1356
HOXD13(Homeobox)/Chicken-Hoxd13-ChIP-Seq(GSE38910)/Homer	NCYAATAAAA	1	-0.9825	0.5133	1024	0.3689	10030.4	0.3656
EGL-5(Homeobox)/cElegans-L3-EGL5-ChIP-Seq(modEncode)/Homer	ATTTAATGGG	1	-0.975	0.5148	1294	0.4661	12697.6	0.4628
GATA-IR3(Zf)/iTreg-Gata3-ChIP-Seq(GSE20898)/Homer	NNNNNBAGATAWYATCTVHN	1	-0.9663	0.517	167	0.0602	1607.2	0.0586
PRDM9(Zf)/Testis-DMC1-ChIP-Seq(GSE35498)/Homer	ADGGYAGYAGCATCT	1	-0.959	0.5185	527	0.1898	5141	0.1874
Pax7(Paired/Homeobox)/Myoblast-Pax7-ChIP-Seq(GSE25064)/Homer	TAATCAATTA	1	-0.8771	0.5602	90	0.0324	865.8	0.0316
PRDM1/BMI1(Zf)/Hela-PRDM1-ChIP-Seq(GSE31477)/Homer	ACTTTCACTTTC	1	-0.8652	0.5644	676	0.2435	6629.3	0.2416
NF1:FOXA1/LNCAP-FOXA1-ChIP-Seq(GSE27824)/Homer	WNTGTTTRYTTTGGCA	1	-0.8522	0.5692	70	0.0252	672.3	0.0245
Smad2(MAD)/ES-SMAD2-ChIP-Seq(GSE29422)/Homer	CTGTCTGG	1	-0.839	0.5743	1545	0.5566	15216.4	0.5547
LIN-39(Homeobox)/cElegans.L3-LIN39-ChIP-Seq(modEncode)/Homer	ATGATTRATG	1	-0.8101	0.5885	1030	0.371	10137.1	0.3695
ETS:E-box/HPC7-Scl-ChIP-Seq(GSE22178)/Homer	AGGAARCAGCTG	1	-0.7642	0.6135	141	0.0508	1379.4	0.0503
PAX3:FKHR-fusion(Paired/Homeobox)/Rh4-PAX3:FKHR-ChIP-Seq(GSE19063)/Homer	ACCRTGACTAATTNN	1	-0.7573	0.6151	237	0.0854	2326.9	0.0848
Phox2a(Homeobox)/Neuron-Phox2a-ChIP-Seq(GSE31456)/Homer	YTAATYNRATTA	1	-0.7186	0.6366	332	0.1196	3271.8	0.1193
Arnt:Ahr(bHLH)/MCF7-Arnt-ChIP-Seq(Lo et al.)/Homer	TBGCACGCAA	1	-0.7081	0.6406	687	0.2475	6780.2	0.2472
RBPJ:Ebox/Panc1-Rbpj1-ChIP-Seq(GSE47459)/Homer	GGGRAARRGRMCAGMTG	1	-0.6977	0.6445	470	0.1693	4639.4	0.1691
SeqBias: CG-repeat	CGCGCGCGCG	1	-0.6669	0.6618	819	0.295	8097.6	0.2952
DREF/Drosophila-Promoters/Homer	AVYTATCGATAD	1	-0.6656	0.6618	10	0.0036	96.5	0.0035
bZIP:IRF/Th17-BatF-ChIP-Seq(GSE39756)/Homer	NAGTTTCABTHTGACTNW	1	-0.6524	0.6658	514	0.1852	5086.8	0.1854
NFY(CCAAT)/Promoter/Homer	RGCCAATSRG	1	-0.6149	0.6884	875	0.3152	8669	0.316
Foxh1(Forkhead)/hESC-FOXH1-ChIP-Seq(GSE29422)/Homer	NNTGTGGATTSS	1	-0.5736	0.7144	648	0.2334	6436.2	0.2346
ABF1/SacCer-Promoters/Homer	CGTRNAAARTGA	1	-0.5725	0.7144	202	0.0728	2015.3	0.0735
Unknown2/Arabidopsis-Promoters/Homer	AAACGACGTCGTTTT	1	-0.5364	0.7353	4	0.0014	40.9	0.0015
Pax8(Paired/Homeobox)/Thyroid-Pax8-ChIP-Seq(GSE26938)/Homer	GTCATGCHTGRCTGS	1	-0.5362	0.7353	485	0.1747	4833.7	0.1762
PHA-4(Forkhead)/cElegans-Embryos-PHA4-ChIP-Seq(modEncode)/Homer	KTGTTTGC	1	-0.4855	0.7673	2094	0.7543	20756	0.7566
HIF-1a(HLH)/MCF7-HIF1a-ChIP-Seq(GSE28352)/Homer	TACGTGCV	1	-0.4548	0.788	267	0.0962	2690.8	0.0981
Tal1	CATCTG	1	-0.4209	0.8119	1455	0.5241	14483.2	0.5279
BMAL1(HLH)/Liver-Bmal1-ChIP-Seq(GSE39860)/Homer	GNCACGTG	1	-0.4137	0.8144	1562	0.5627	15543.4	0.5666
SeqBias: CA-repeat	CACACACACA	1	-0.3591	0.8566	2444	0.8804	24237.4	0.8835
MafF(bZIP)/HepG2-MafF-ChIP-Seq(GSE31477)/Homer	HWWGTCAGCAWWTTT	1	-0.3493	0.8615	270	0.0973	2752.3	0.1003
Mef2c(MADS)/GM12878-Mef2c-ChIP-Seq(GSE32465)/Homer	DCYAAAAATAGM	1	-0.3485	0.8615	396	0.1427	4013.3	0.1463
Max(HLH)/K562-Max-ChIP-Seq(GSE31477)/Homer	RCCACGTGGYYN	1	-0.3381	0.8643	794	0.286	7981.9	0.291
GAGA-repeat/SacCer-Promoters/Homer	CTYTCTYTCTCTCTC	1	-0.3305	0.8674	2314	0.8336	22979	0.8376
Egr1(Zf)/K562-Egr1-ChIP-Seq(GSE32465)/Homer	TGCGTGGGYG	1	-0.3194	0.8736	838	0.3019	8428.8	0.3072
RUNX2(Runt)/PCa-RUNX2-ChIP-Seq(GSE33889)/Homer	NWAACCACADNN	1	-0.3154	0.8736	974	0.3509	9780.6	0.3565
CES-1(Homeobox)/cElegans-L1-CES1-ChIP-Seq(modEncode)/Homer	AAATTSAATTTN	1	-0.3137	0.8736	470	0.1693	4767.3	0.1738
ERE(NR/IR3)/MCF7-ERa-ChIP-Seq(Unpublished)/Homer	VAGGTCACNSTGACC	1	-0.2875	0.8914	396	0.1427	4039.4	0.1472
Mef2a(MADS)/HL1-Mef2a.biotin-ChIP-Seq(GSE21529/Homer	CYAAAAATAG	1	-0.277	0.8973	401	0.1445	4094.6	0.1493
Mouse_Recombination_Hotspot/Testis-DMC1-ChIP-Seq(GSE24438)/Homer	ACTYKNATTCGTGNTACTTC	1	-0.2713	0.8988	72	0.0259	771.9	0.0281
Oct4(POU/Homeobox)/mES-Oct4-ChIP-Seq(GSE11431)/Homer	ATTTGCATAW	1	-0.2565	0.9087	445	0.1603	4545.5	0.1657
EFL-1(E2F)/cElegans-L1-EFL1-ChIP-Seq(modEncode)/Homer	TGCAARYGCGCTCYA	1	-0.1952	0.9624	17	0.0061	206.7	0.0075
Pitx1(Homeobox)/Chicken-Pitx1-ChIP-Seq(GSE38910)/Homer	TAATCCCN	1	-0.187	0.9666	2299	0.8282	22907.1	0.835
CRX(Homeobox)/Retina-Crx-ChIP-Seq(GSE20012)/Homer	GCTAATCC	1	-0.1821	0.9677	1804	0.6499	18073.8	0.6588
Pax7-long(Paired/Homeobox)/Myoblast-Pax7-ChIP-Seq(GSE25064)/Homer	TAATCHGATTAC	1	-0.1668	0.9789	14	0.005	178	0.0065
NPAS2(HLH)/Liver-NPAS2-ChIP-Seq(GSE39860)/Homer	KCCACGTGAC	1	-0.16	0.9818	1131	0.4074	11453	0.4175
ZFX(Zf)/mES-Zfx-ChIP-Seq(GSE11431)/Homer	AGGCCTRG	1	-0.1566	0.9818	1274	0.4589	12873.6	0.4693
GATA-DR4(Zf)/iTreg-Gata3-ChIP-Seq(GSE20898)/Homer	AGATGKDGAGATAAG	1	-0.1523	0.9818	95	0.0342	1045.9	0.0381
PIF5ox(bHLH)/Arabidopsis-PIF5ox-ChIP-Seq(GSE35062)/Homer	BCACGTGVDN	1	-0.1328	0.9974	1063	0.3829	10807.3	0.3939
Oct2(POU/Homeobox)/Bcell-Oct2-ChIP-Seq(GSE21512)/Homer	ATATGCAAAT	1	-0.1224	1	270	0.0973	2862.4	0.1043
Rfx1(HTH)/NPC-H3K4me1-ChIP-Seq(GSE16256)/Homer	KGTTGCCATGGCAA	1	-0.1043	1	271	0.0976	2887.8	0.1053
HOXA2(Homeobox)/mES-Hoxa2-ChIP-Seq(Donaldson et al.)/Homer	GYCATCMATCAT	1	-0.08672	1	117	0.0421	1310.2	0.0478
NRF1(NRF)/MCF7-NRF1-ChIP-Seq(Unpublished)/Homer	CTGCGCATGCGC	1	-0.07706	1	111	0.04	1254.9	0.0457
Pax7-longest(Paired/Homeobox)/Myoblast-Pax7-ChIP-Seq(GSE25064)/Homer	NTAATTDGCYAATTANNWWD	1	-0.07569	1	16	0.0058	221.5	0.0081
ZNF711(Zf)/SH-SY5Y-ZNF711-ChIP-Seq(GSE20673)/Homer	AGGCCTAG	1	-0.07194	1	1480	0.5331	15023.6	0.5476
n-Myc(HLH)/mES-nMyc-ChIP-Seq(GSE11431)/Homer	VRCCACGTGG	1	-0.0664	1	781	0.2813	8090.9	0.2949
GLI3(Zf)/GLI3-ChIP-Chip(GSE11077)/Homer	CGTGGGTGGTCC	1	-0.04686	1	180	0.0648	2010.2	0.0733
ARE(NR)/LNCAP-AR-ChIP-Seq(GSE27824)/Homer	RGRACASNSTGTYCYB	1	-0.04128	1	359	0.1293	3871.3	0.1411
PAX5(Paired/Homeobox)/GM12878-PAX5-ChIP-Seq(GSE32465)/Homer	GCAGCCAAGCRTGACH	1	-0.0278	1	466	0.1679	5001.4	0.1823
NRF1/Promoter/Homer	STGCGCATGCGC	1	-0.02192	1	169	0.0609	1942.5	0.0708
Pho2(bHLH)/Yeast-Pho2-ChIP-Seq(GSE29506)/Homer	CCCACGTGCT	1	-0.01842	1	477	0.1718	5150.5	0.1877
Rfx5(HTH)/GM12878-Rfx5-ChIP-Seq(GSE31477)/Homer	SCCTAGCAACAG	1	-0.0149	1	441	0.1589	4799.1	0.1749
FOXA1(Forkhead)/LNCAP-FOXA1-ChIP-Seq(GSE27824)/Homer	WAAGTAAACA	1	-0.0121	1	1115	0.4017	11621.6	0.4236
Unknown4/Arabidopsis-Promoters/Homer	CKTCKTCTTY	1	-0.01111	1	1032	0.3718	10802.9	0.3938
PCF/Arabidopsis-Promoters/Homer	NNWWWTGGGCYTDDN	1	-0.01069	1	282	0.1016	3177.7	0.1158
GFY-Staf/Promoters/Homer	RACTACAATTCCCAGAAKGC	1	-0.01058	1	56	0.0202	744.4	0.0271
LIN-15B(Zf)/cElegans-L3-LIN15B-ChIP-Seq(modEncode)/Homer	CARTGGAGCGCRYTTGCATT	1	-0.01031	1	2	0.0007	67.5	0.0025
p53(p53)/Saos-p53-ChIP-Seq/Homer	RRCATGYCYRGRCATGYYYN	1	-0.008559	1	113	0.0407	1388.9	0.0506
p53(p53)/Saos-p53-ChIP-Seq(GSE15780)/Homer	RRCATGYCYRGRCATGYYYN	1	-0.008559	1	113	0.0407	1388.9	0.0506
c-Myc/mES-cMyc-ChIP-Seq(GSE11431)/Homer	VVCCACGTGG	1	-0.007811	1	606	0.2183	6541.8	0.2385
TATA-box/Drosophila-Promoters/Homer	CTATAAAAGCSV	1	-0.007358	1	73	0.0263	950.9	0.0347
FOXA1(Forkhead)/MCF7-FOXA1-ChIP-Seq(GSE26831)/Homer	WAAGTAAACA	1	-0.006616	1	953	0.3433	10062.2	0.3668
Nr5a2(NR)/Pancreas-LRH1-ChIP-Seq(GSE34295)/Homer	BTCAAGGTCA	1	-0.005472	1	911	0.3282	9658.2	0.3521
GAGA-repeat/Arabidopsis-Promoters/Homer	CTCTCTCTCY	1	-0.00271	1	1368	0.4928	14273.6	0.5203
Nr5a2(NR)/mES-Nr5a2-ChIP-Seq(GSE19019)/Homer	BTCAAGGTCA	1	-0.002046	1	725	0.2612	7862.2	0.2866
SFP1/SacCer-Promoters/Homer	DDAAAAATTTTY	1	-0.001875	1	55	0.0198	788.8	0.0288
YY1(Zf)/Promoter/Homer	CAAGATGGCGGC	1	-0.000838	1	67	0.0241	955	0.0348
Unknown6/Drosophila-Promoters/Homer	AATTTTAAAA	1	-0.000374	1	670	0.2414	7424.1	0.2706
SEP3(MADS)/Arabidoposis-Flower-Sep3-ChIP-Seq/Homer	CCAAAAAGGG	1	-8.9e-05	1	1053	0.3793	11405.2	0.4157
OCT4-SOX2-TCF-NANOG((POU/Homeobox/HMG)/mES-Oct4-ChIP-Seq(GSE11431)/Homer	ATTTGCATAACAATG	1	-3.3e-05	1	135	0.0486	1848	0.0674
SeqBias: TA-repeat	TATATATATA	1	-1.7e-05	1	1716	0.6182	18036.4	0.6575
GATA-DR8(Zf)/iTreg-Gata3-ChIP-Seq(GSE20898)/Homer	AGATSTNDNNDSAGATAASN	1	-1.3e-05	1	77	0.0277	1192.2	0.0435
FOXA1:AR/LNCAP-AR-ChIP-Seq(GSE27824)/Homer	AGTAAACAAAAAAGAACAND	1	0	1	57	0.0205	1034.1	0.0377
TATA-box/SacCer-Promoters/Homer	BBHWTATATA	1	0	1	418	0.1506	5545.6	0.2021
RLR1?/SacCer-Promoters/Homer	WTTTTCYYTTTT	1	0	1	548	0.1974	7622.9	0.2779
RARg(NR)/ES-RARg-ChIP-Seq(GSE30538)/Homer	AGGTCAAGGTCA	1	0	1	65	0.0234	1578.9	0.0576

## Sheet: Colon DownvsBkgd
TABLE S13: Motif prediction in DHS near genes consistently up or down-regulated in colonized vs. germ-free ileum and colon
Motif Name	Consensus	P-value	Log P-value	q-value (Benjamini)	# of Target Sequences with Motif(of 2786)	% of Target Sequences with Motif	# of Background Sequences with Motif(of 27274)	% of Background Sequences with Motif
CTCF(Zf)/CD4+-CTCF-ChIP-Seq(Barski et al.)/Homer	AYAGTGCCMYCTRGTGGCCA	1e-79	-182.6	0	451	0.1619	1502.8	0.0551
BORIS(Zf)/K562-CTCFL-ChIP-Seq(GSE32465)/Homer	CNNBRGCGCCCCCTGSTGGC	1e-56	-129.1	0	498	0.1788	2166.1	0.0795
HNF4a(NR/DR1)/HepG2-HNF4a-ChIP-Seq(GSE25021)/Homer	CARRGKBCAAAGTYCA	1e-31	-73.31	0	754	0.2707	4773.5	0.1752
Atf3(bZIP)/GBM-ATF3-ChIP-Seq(GSE33912)/Homer	DATGASTCATHN	1e-23	-53.38	0	773	0.2776	5299.9	0.1945
caudal(Homeobox)/Drosophila-Embryos-ChIP-Chip(modEncode)/Homer	GGYCATAAAW	1e-20	-47.47	0	928	0.3332	6789.2	0.2491
BATF(bZIP)/Th17-BATF-ChIP-Seq(GSE39756)/Homer	DATGASTCAT	1e-18	-42.7	0	757	0.2718	5393.8	0.1979
AP-1(bZIP)/ThioMac-PU.1-ChIP-Seq(GSE21512)/Homer	VTGACTCATC	1e-18	-42.65	0	830	0.298	6035.2	0.2215
KLF5(Zf)/LoVo-KLF5-ChIP-Seq(GSE49402)/Homer	DGGGYGKGGC	1e-17	-41.33	0	1315	0.4722	10526.5	0.3863
Cdx2(Homeobox)/mES-Cdx2-ChIP-Seq(GSE14586)/Homer	GYMATAAAAH	1e-17	-40.58	0	867	0.3113	6415.4	0.2354
Jun-AP1(bZIP)/K562-cJun-ChIP-Seq(GSE31477)/Homer	GATGASTCATCN	1e-16	-38.64	0	329	0.1181	1928.8	0.0708
Klf4(Zf)/mES-Klf4-ChIP-Seq(GSE11431)/Homer	GCCACACCCA	1e-12	-28.23	0	548	0.1968	3934.8	0.1444
NF1(CTF)/LNCAP-NF1-ChIP-Seq(Unpublished)/Homer	CYTGGCABNSTGCCAR	1e-11	-27.6	0	509	0.1828	3615	0.1327
Gata1(Zf)/K562-GATA1-ChIP-Seq(GSE18829)/Homer	SAGATAAGRV	1e-11	-27.27	0	688	0.247	5185.6	0.1903
Bach2(bZIP)/OCILy7-Bach2-ChIP-Seq(GSE44420)/Homer	TGCTGAGTCA	1e-11	-26.12	0	263	0.0944	1618.5	0.0594
Gata2(Zf)/K562-GATA2-ChIP-Seq(GSE18829)/Homer	BBCTTATCTS	1e-10	-25.02	0	754	0.2707	5844.7	0.2145
Sp1(Zf)/Promoter/Homer	GGCCCCGCCCCC	1e-10	-23.74	0	303	0.1088	1982.9	0.0728
Gata4(Zf)/Heart-Gata4-ChIP-Seq(GSE35151)/Homer	NBWGATAAGR	1e-10	-23.62	0	1053	0.3781	8643.6	0.3172
ERG(ETS)/VCaP-ERG-ChIP-Seq(GSE14097)/Homer	ACAGGAAGTG	1e-09	-22.67	0	1486	0.5336	12826.2	0.4707
EWS:ERG-fusion(ETS)/CADO_ES1-EWS:ERG-ChIP-Seq(SRA014231)/Homer	ATTTCCTGTN	1e-09	-21.67	0	831	0.2984	6658.4	0.2443
Unknown(Homeobox)/Limb-p300-ChIP-Seq/Homer	SSCMATWAAA	1e-09	-20.93	0	769	0.2761	6118.4	0.2245
EHF(ETS)/LoVo-EHF-ChIP-Seq(GSE49402)/Homer	AVCAGGAAGT	1e-08	-20.46	0	1306	0.4689	11175.1	0.4101
EKLF(Zf)/Erythrocyte-Klf1-ChIP-Seq(GSE20478)/Homer	NWGGGTGTGGCY	1e-08	-20.43	0	329	0.1181	2268.5	0.0832
Fox:Ebox(Forkhead:HLH)/Panc1-Foxa2-ChIP-Seq(GSE47459)/Homer	NNNVCTGWGYAAACASN	1e-08	-19.81	0	1069	0.3838	8945.2	0.3283
Foxa2(Forkhead)/Liver-Foxa2-ChIP-Seq(GSE25694)/Homer	CYTGTTTACWYW	1e-08	-19.74	0	887	0.3185	7247.7	0.266
Foxo1(Forkhead)/RAW-Foxo1-ChIP-Seq(Fan et al.)/Homer	CTGTTTAC	1e-08	-18.8	0	1624	0.5831	14353.9	0.5267
PQM-1(?)/cElegans-L3-ChIP-Seq(modEncode)/Homer	ACTGATAAGA	1e-08	-18.69	0	444	0.1594	3294.9	0.1209
ELF5(ETS)/T47D-ELF5-ChIP-Seq(GSE30407)/Homer	ACVAGGAAGT	1e-07	-18.4	0	863	0.3099	7078.4	0.2597
Hnf1(Homeobox)/Liver-Foxa2-Chip-Seq(GSE25694)/Homer	GGTTAAWCATTAA	1e-07	-18.23	0	193	0.0693	1208.4	0.0443
NF1-halfsite(CTF)/LNCaP-NF1-ChIP-Seq(Unpublished)/Homer	YTGCCAAG	1e-07	-18.01	0	1521	0.5461	13376.9	0.4909
STAT6(Stat)/CD4-Stat6-ChIP-Seq(GSE22104)/Homer	ABTTCYYRRGAA	1e-07	-17.44	0	611	0.2194	4813.2	0.1766
RXR(NR/DR1)/3T3L1-RXR-ChIP-Seq(GSE13511)/Homer	TAGGGCAAAGGTCA	1e-07	-17.36	0	1175	0.4219	10060	0.3692
Nur77(NR)/K562-NR4A1-ChIP-Seq(GSE31363)/Homer	TGACCTTTNCNT	1e-07	-16.31	0	259	0.093	1783.3	0.0654
PPARE(NR/DR1)/3T3L1-Pparg-ChIP-Seq(GSE13511)/Homer	TGACCTTTGCCCCA	1e-06	-15.94	0	1041	0.3738	8852.1	0.3248
HOXA9(Homeobox)/HSC-Hoxa9-ChIP-Seq(GSE33509)/Homer	GGCCATAAATCA	1e-06	-15.88	0	698	0.2506	5662.8	0.2078
Stat3(Stat)/mES-Stat3-ChIP-Seq(GSE11431)/Homer	CTTCCGGGAA	1e-06	-15.87	0	606	0.2176	4827	0.1771
Sox2(HMG)/mES-Sox2-ChIP-Seq(GSE11431)/Homer	BCCATTGTTC	1e-06	-15.76	0	960	0.3447	8097.1	0.2971
Tbx5(T-box)/HL1-Tbx5.biotin-ChIP-Seq(GSE21529)/Homer	AGGTGTCA	1e-06	-15.71	0	2079	0.7465	19086.9	0.7004
ELF1(ETS)/Jurkat-ELF1-ChIP-Seq(SRA014231)/Homer	AVCCGGAAGT	1e-06	-15.51	0	577	0.2072	4579	0.168
HOXD13(Homeobox)/Chicken-Hoxd13-ChIP-Seq(GSE38910)/Homer	NCYAATAAAA	1e-06	-15.44	0	1093	0.3925	9369.5	0.3438
NFkB-p65-Rel(RHD)/LPS-exp(GSE23622)/Homer	GGAAATTCCC	1e-06	-15.23	0	83	0.0298	424.8	0.0156
Elk1(ETS)/Hela-Elk1-ChIP-Seq(GSE31477)/Homer	HACTTCCGGY	1e-06	-14.71	0	604	0.2169	4853.1	0.1781
GABPA(ETS)/Jurkat-GABPa-ChIP-Seq(GSE17954)/Homer	RACCGGAAGT	1e-06	-14.39	0	946	0.3397	8030.6	0.2947
Sox3(HMG)/NPC-Sox3-ChIP-Seq(GSE33059)/Homer	CCWTTGTY	1e-05	-13.67	0	1522	0.5465	13607.9	0.4994
BMYB(HTH)/Hela-BMYB-ChIPSeq(GSE27030)/Homer	NHAACBGYYV	1e-05	-13.65	0	1322	0.4747	11659.5	0.4279
Oct4:Sox17/F9-Sox17-ChIP-Seq(GSE44553)/Homer	CCATTGTATGCAAAT	1e-05	-13.57	0	157	0.0564	1011.2	0.0371
CEBP:AP1(bZIP)/ThioMac-CEBPb-ChIP-Seq(GSE21512)/Homer	DRTGTTGCAA	1e-05	-13.38	0	711	0.2553	5888.2	0.2161
E2F4(E2F)/K562-E2F4-ChIP-Seq(GSE31477)/Homer	GGCGGGAAAH	1e-05	-12.97	0	344	0.1235	2600.4	0.0954
ETS1(ETS)/Jurkat-ETS1-ChIP-Seq(GSE17954)/Homer	ACAGGAAGTG	1e-05	-12.77	0	1069	0.3838	9277.8	0.3405
NFkB-p65(RHD)/GM12787-p65-ChIP-Seq(GSE19485)/Homer	WGGGGATTTCCC	1e-05	-12.75	0	574	0.2061	4661.7	0.1711
Foxh1(Forkhead)/hESC-FOXH1-ChIP-Seq(GSE29422)/Homer	NNTGTGGATTSS	1e-05	-12.73	0	637	0.2287	5237	0.1922
Tlx?(NR)/NPC-H3K4me1-ChIP-Seq(GSE16256)/Homer	CTGGCAGSCTGCCA	1e-05	-12.55	0	549	0.1971	4442.4	0.163
STAT4(Stat)/CD4-Stat4-ChIP-Seq(GSE22104)/Homer	NYTTCCWGGAAR	1e-05	-12.41	0	984	0.3533	8489.5	0.3115
Fli1(ETS)/CD8-FLI-ChIP-Seq(GSE20898)/Homer	NRYTTCCGGH	1e-05	-12.33	0	1093	0.3925	9530.8	0.3497
TR4(NR/DR1)/Hela-TR4-ChIP-Seq(GSE24685)/Homer	GAGGTCAAAGGTCA	1e-05	-12.32	0	188	0.0675	1290.2	0.0473
STAT6/Macrophage-Stat6-ChIP-Seq(GSE38377)/Homer	TTCCKNAGAA	1e-05	-11.93	0	595	0.2136	4888.8	0.1794
E-box/Drosophila-Promoters/Homer	AACAGCTGTTHN	1e-05	-11.92	0	316	0.1135	2390	0.0877
TEAD(TEA)/Fibroblast-PU.1-ChIP-Seq(Unpublished)/Homer	YCWGGAATGY	1e-05	-11.52	0.0001	708	0.2542	5948.7	0.2183
GATA3(Zf)/iTreg-Gata3-ChIP-Seq(GSE20898)/Homer	AGATAASR	0.0001	-11.37	0.0001	1347	0.4837	12033	0.4416
TRa(NR)/C17.2-TRa-ChIP-Seq(GSE38347)/Homer	GGTCANYTGAGGWCA	0.0001	-11.01	0.0001	480	0.1724	3882.5	0.1425
AMYB(HTH)/Testes-AMYB-ChIP-Seq(GSE44588)/Homer	TGGCAGTTGG	0.0001	-10.72	0.0001	1346	0.4833	12062.5	0.4426
EBF(EBF)/proBcell-EBF-ChIP-Seq(GSE21978)/Homer	DGTCCCYRGGGA	0.0001	-10.45	0.0001	290	0.1041	2212.5	0.0812
EWS:FLI1-fusion(ETS)/SK_N_MC-EWS:FLI1-ChIP-Seq(SRA014231)/Homer	VACAGGAAAT	0.0001	-10.39	0.0002	641	0.2302	5384.2	0.1976
ELT-3(Gata)/cElegans-L1-ELT3-ChIP-Seq(modEncode)/Homer	AWTGATAAGA	0.0001	-10.3	0.0002	484	0.1738	3949.6	0.1449
Tcf12(HLH)/GM12878-Tcf12-ChIP-Seq(GSE32465)/Homer	VCAGCTGYTG	0.0001	-10.14	0.0002	945	0.3393	8247.6	0.3027
TATA-Box(TBP)/Promoter/Homer	CCTTTTAWAGSC	0.0001	-10.13	0.0002	1250	0.4488	11169.4	0.4099
IRF2(IRF)/Erythroblas-IRF2-ChIP-Seq(GSE36985)/Homer	GAAASYGAAASY	0.0001	-10.03	0.0002	142	0.051	965	0.0354
SPDEF(ETS)/VCaP-SPDEF-ChIP-Seq(SRA014231)/Homer	ASWTCCTGBT	0.0001	-9.999	0.0002	1068	0.3835	9427.1	0.3459
Sox6(HMG)/Myotubes-Sox6-ChIP-Seq(GSE32627)/Homer	CCATTGTTNY	0.0001	-9.811	0.0002	1403	0.5038	12675.7	0.4651
Myf5(bHLH)/GM-Myf5-ChIP-Seq(GSE24852)/Homer	BAACAGCTGT	0.0001	-9.765	0.0003	747	0.2682	6403.1	0.235
c-Jun-CRE(bZIP)/K562-cJun-ChIP-Seq(GSE31477)/Homer	ATGACGTCATCY	0.0001	-9.684	0.0003	320	0.1149	2504	0.0919
Hoxc9(Homeobox)/Ainv15-Hoxc9-ChIP-Seq(GSE21812)/Homer	GGCCATAAATCA	0.0001	-9.674	0.0003	526	0.1889	4361.3	0.16
JunD(bZIP)/K562-JunD-ChIP-Seq/Homer	ATGACGTCATCN	0.0001	-9.521	0.0003	101	0.0363	645.4	0.0237
Stat3+il21(Stat)/CD4-Stat3-ChIP-Seq(GSE19198)/Homer	SVYTTCCNGGAARB	0.0001	-9.342	0.0004	774	0.2779	6680.2	0.2451
E2F6(E2F)/Hela-E2F6-ChIP-Seq(GSE31477)/Homer	GGCGGGAARN	0.001	-9.143	0.0004	442	0.1587	3620.7	0.1329
HLH-1(bHLH)/cElegans-Embryo-HLH1-ChIP-Seq(modEncode)/Homer	RACAGCTGTTBH	0.001	-9.081	0.0005	836	0.3002	7279	0.2671
ETV1(ETS)/GIST48-ETV1-ChIP-Seq(GSE22441)/Homer	AACCGGAAGT	0.001	-8.868	0.0006	1289	0.4628	11630.1	0.4268
HRE(HSF)/Striatum-HSF1-ChIP-Seq(GSE38000)/Homer	TTCTAGAABNTTCTA	0.001	-8.855	0.0006	283	0.1016	2207.4	0.081
Ets1-distal(ETS)/CD4+-PolII-ChIP-Seq(Barski et al.)/Homer	MACAGGAAGT	0.001	-8.63	0.0007	379	0.1361	3073.6	0.1128
Erra(NR)/HepG2-Erra-ChIP-Seq(GSE31477)/Homer	CAAAGGTCAG	0.001	-8.559	0.0007	1748	0.6276	16157.9	0.5929
ETS(ETS)/Promoter/Homer	AACCGGAAGT	0.001	-8.514	0.0008	373	0.1339	3024.1	0.111
CHR/Cell-Cycle-Exp/Homer	SRGTTTCAAA	0.001	-8.344	0.0009	603	0.2165	5140.1	0.1886
Esrrb(NR)/mES-Esrrb-ChIP-Seq(GSE11431)/Homer	KTGACCTTGA	0.001	-8.298	0.0009	756	0.2715	6573.5	0.2412
Elk4(ETS)/Hela-Elk4-ChIP-Seq(GSE31477)/Homer	NRYTTCCGGY	0.001	-8.294	0.0009	555	0.1993	4698.4	0.1724
ETS:RUNX/Jurkat-RUNX1-ChIP-Seq(GSE17954)/Homer	RCAGGATGTGGT	0.001	-8.134	0.0011	128	0.046	895.5	0.0329
Nrf2(bZIP)/Lymphoblast-Nrf2-ChIP-Seq(GSE37589)/Homer	HTGCTGAGTCAT	0.001	-8.101	0.0011	70	0.0251	428.2	0.0157
CEBP(bZIP)/CEBPb-ChIP-Seq(GSE21512)/Homer	ATTGCGCAAC	0.001	-8.086	0.0011	621	0.223	5322.7	0.1953
MyoG(HLH)/C2C12-MyoG-ChIP-Seq(GSE36024)/Homer	AACAGCTG	0.001	-7.831	0.0014	1028	0.3691	9187.2	0.3371
NF-E2(bZIP)/K562-NFE2-ChIP-Seq(GSE31477)/Homer	GATGACTCAGCA	0.001	-7.739	0.0015	80	0.0287	513.6	0.0188
Initiator/Drosophila-Promoters/Homer	NTCAGTYG	0.001	-7.706	0.0015	1759	0.6316	16328.1	0.5992
E2F(E2F)/Cell-Cycle-Exp/Homer	TTSGCGCGAAAA	0.001	-7.519	0.0018	52	0.0187	300	0.011
ISRE(IRF)/ThioMac-LPS-exp(GSE23622)/HOMER	AGTTTCASTTTC	0.001	-7.439	0.002	86	0.0309	567.8	0.0208
Maz(Zf)/HepG2-Maz-ChIP-Seq(GSE31477)/Homer	GGGGGGGG	0.001	-7.389	0.002	1150	0.4129	10392.3	0.3814
Rbpj1(?)/Panc1-Rbpj1-ChIP-Seq(GSE47459)/Homer	HTTTCCCASG	0.001	-7.19	0.0025	1324	0.4754	12093.3	0.4438
SCL(HLH)/HPC7-Scl-ChIP-Seq(GSE13511)/Homer	AVCAGCTG	0.001	-7.161	0.0025	2288	0.8215	21702.4	0.7964
E2A(HLH)/proBcell-E2A-ChIP-Seq(GSE21978)/Homer	DNRCAGCTGY	0.001	-7.16	0.0025	1279	0.4592	11658.7	0.4278
EBF1(EBF)/Near-E2A-ChIP-Seq(GSE21512)/Homer	GTCCCCWGGGGA	0.001	-7.133	0.0025	1027	0.3688	9228.6	0.3387
CEBP:CEBP(bZIP)/MEF-Chop-ChIP-Seq(GSE35681)/Homer	NTNATGCAAYMNNHTGMAAY	0.001	-7.006	0.0028	152	0.0546	1129.6	0.0415
Tbet(T-box)/CD8-Tbet-ChIP-Seq(GSE33802)/Homer	AGGTGTGAAM	0.001	-6.93	0.003	1008	0.3619	9061.5	0.3325
FOXP1(Forkhead)/H9-FOXP1-ChIP-Seq(GSE31006)/Homer	NYYTGTTTACHN	0.01	-6.676	0.0039	481	0.1727	4104.6	0.1506
MYB(HTH)/ERMYB-Myb-ChIPSeq(GSE22095)/Homer	GGCVGTTR	0.01	-6.672	0.0039	1431	0.5138	13178.8	0.4836
Tcf4(HMG)/Hct116-Tcf4-ChIP-Seq(SRA012054)/Homer	ASATCAAAGGVA	0.01	-6.342	0.0053	517	0.1856	4458.1	0.1636
Gfi1b(Zf)/HPC7-Gfi1b-ChIP-Seq(GSE22178)/Homer	MAATCACTGC	0.01	-6.284	0.0055	654	0.2348	5744.2	0.2108
STAT1(Stat)/HelaS3-STAT1-ChIP-Seq(GSE12782)/Homer	NATTTCCNGGAAAT	0.01	-6.266	0.0056	349	0.1253	2913.6	0.1069
TEAD4(TEA)/Tropoblast-Tead4-ChIP-Seq(GSE37350)/Homer	CCWGGAATGY	0.01	-6.18	0.006	852	0.3059	7627.9	0.2799
SeqBias: CG bias	SSSSSSSSSS	0.01	-6.133	0.0063	2488	0.8934	23838.7	0.8748
Atf4(bZIP)/MEF-Atf4-ChIP-Seq(GSE35681)/Homer	MTGATGCAAT	0.01	-6.003	0.0071	272	0.0977	2227.7	0.0817
SUT1?/SacCer-Promoters/Homer	CCCCGCGC	0.01	-6	0.0071	2278	0.818	21678.7	0.7955
Eomes(T-box)/H9-Eomes-ChIP-Seq(GSE26097)/Homer	ATTAACACCT	0.01	-5.975	0.0071	1629	0.5849	15181.5	0.5571
Bach1(bZIP)/K562-Bach1-ChIP-Seq(GSE31477)/Homer	AWWNTGCTGAGTCAT	0.01	-5.967	0.0071	70	0.0251	469.9	0.0172
NeuroD1(bHLH)/Islet-NeuroD1-ChIP-Seq(GSE30298)/Homer	GCCATCTGTT	0.01	-5.801	0.0083	884	0.3174	7962.4	0.2922
GRHL2(CP2)/HBE-GRHL2-ChIP-Seq(GSE46194)/Homer	AAACYKGTTWDACMRGTTTB	0.01	-5.744	0.0087	426	0.153	3650.3	0.1339
Nanog(Homeobox)/mES-Nanog-ChIP-Seq(GSE11724)/Homer	RGCCATTAAC	0.01	-5.702	0.009	2290	0.8223	21822.8	0.8008
GRE(NR/IR3)/A549-GR-ChIP-Seq(GSE32465)/Homer	NRGVACABNVTGTYCY	0.01	-5.541	0.0105	159	0.0571	1239.4	0.0455
USF1(HLH)/GM12878-Usf1-ChIP-Seq(GSE32465)/Homer	SGTCACGTGR	0.01	-5.466	0.0112	464	0.1666	4020.7	0.1475
GRE/RAW264.7-GRE-ChIP-Seq(Unpublished)/Homer	VAGRACAKWCTGTYC	0.01	-5.465	0.0112	273	0.098	2262.3	0.083
AP-2gamma(AP2)/MCF7-TFAP2C-ChIP-Seq(GSE21234)/Homer	SCCTSAGGSCAW	0.01	-5.388	0.0119	929	0.3336	8427.5	0.3093
PU.1(ETS)/ThioMac-PU.1-ChIP-Seq(GSE21512)/Homer	AGAGGAAGTG	0.01	-5.357	0.0122	570	0.2047	5019.7	0.1842
Chop(bZIP)/MEF-Chop-ChIP-Seq(GSE35681)/Homer	ATTGCATCAT	0.01	-5.311	0.0127	209	0.075	1692.5	0.0621
Mef2a(MADS)/HL1-Mef2a.biotin-ChIP-Seq(GSE21529/Homer	CYAAAAATAG	0.01	-5.241	0.0135	408	0.1465	3514.4	0.129
IRF4(IRF)/GM12878-IRF4-ChIP-Seq(GSE32465)/Homer	ACTGAAACCA	0.01	-5.232	0.0135	444	0.1594	3849.2	0.1413
FOXA1(Forkhead)/LNCAP-FOXA1-ChIP-Seq(GSE27824)/Homer	WAAGTAAACA	0.01	-5.214	0.0136	1143	0.4104	10504.9	0.3855
HNF6(Homeobox)/Liver-Hnf6-ChIP-Seq(ERP000394)/Homer	NTATYGATCH	0.01	-5.211	0.0136	506	0.1817	4429.8	0.1626
AP-2alpha(AP2)/Hela-AP2alpha-ChIP-Seq(GSE31477)/Homer	ATGCCCTGAGGC	0.01	-5.106	0.0149	758	0.2722	6817.4	0.2502
Pbx3(Homeobox)/GM12878-PBX3-ChIP-Seq(GSE32465)/Homer	SCTGTCAMTCAN	0.01	-5.023	0.0161	298	0.107	2513	0.0922
CTCF-SatelliteElement/CD4+-CTCF-ChIP-Seq(Barski et al.)/Homer	TGCAGTTCCMVNWRTGGCCA	0.01	-4.926	0.0176	30	0.0108	173.3	0.0064
Srebp1a(HLH)/HepG2-Srebp1a-ChIP-Seq(GSE31477)/Homer	RTCACSCCAY	0.01	-4.873	0.0184	216	0.0776	1775.5	0.0652
ETS:E-box/HPC7-Scl-ChIP-Seq(GSE22178)/Homer	AGGAARCAGCTG	0.01	-4.777	0.0201	117	0.042	899	0.033
Unknown1(NR/Ini-like)/Drosophila-Promoters/Homer	MYGGTCACACTG	0.01	-4.74	0.0207	241	0.0865	2008.6	0.0737
E-box(HLH)/Promoter/Homer	SSGGTCACGTGA	0.01	-4.671	0.022	86	0.0309	635.9	0.0233
Smad2(MAD)/ES-SMAD2-ChIP-Seq(GSE29422)/Homer	CTGTCTGG	0.01	-4.659	0.0221	1375	0.4937	12813.1	0.4702
ABF1/SacCer-Promoters/Homer	CGTRNAAARTGA	0.01	-4.645	0.0222	173	0.0621	1399.7	0.0514
GFY(?)/Promoter/Homer	ACTACAATTCCC	0.01	-4.643	0.0222	74	0.0266	534.2	0.0196
STAT5(Stat)/mCD4+-Stat5-ChIP-Seq(GSE12346)/Homer	RTTTCTNAGAAA	0.01	-4.613	0.0226	396	0.1422	3443.9	0.1264
FOXA1(Forkhead)/MCF7-FOXA1-ChIP-Seq(GSE26831)/Homer	WAAGTAAACA	0.1	-4.602	0.0227	985	0.3537	9036.5	0.3316
Nkx6.1(Homeobox)/Islet-Nkx6.1-ChIP-Seq(GSE40975)/Homer	GKTAATGR	0.1	-4.593	0.0227	1794	0.6442	16940.6	0.6217
Tbox:Smad/ESCd5-Smad2_3-ChIP-Seq(GSE29422)/Homer	AGGTGHCAGACA	0.1	-4.476	0.0253	243	0.0873	2040.3	0.0749
Usf2(HLH)/C2C12-Usf2-ChIP-Seq(GSE36030)/Homer	GTCACGTGGT	0.1	-4.46	0.0256	332	0.1192	2859.7	0.1049
FXR(NR/IR1)/Liver-FXR-ChIP-Seq(Chong et al.)/Homer	AGGTCANTGACCTB	0.1	-4.397	0.027	424	0.1522	3719.3	0.1365
Atf1(bZIP)/K562-ATF1-ChIP-Seq(GSE31477)/Homer	GATGACGTCA	0.1	-4.392	0.027	598	0.2147	5357.4	0.1966
GATA-IR4(Zf)/iTreg-Gata3-ChIP-Seq(GSE20898)/Homer	NAGATWNBNATCTNN	0.1	-4.272	0.0302	79	0.0284	587.9	0.0216
AARE(HLH)/mES-cMyc-ChIP-Seq/Homer	GATTGCATCA	0.1	-4.197	0.0323	93	0.0334	710.6	0.0261
Unknown4/Drosophila-Promoters/Homer	AAAAATACCRMA	0.1	-4.195	0.0323	129	0.0463	1026.6	0.0377
TCFL2(HMG)/K562-TCF7L2-ChIP-Seq(GSE29196)/Homer	ACWTCAAAGG	0.1	-4.128	0.0341	101	0.0363	782.5	0.0287
Rfx1(HTH)/NPC-H3K4me1-ChIP-Seq(GSE16256)/Homer	KGTTGCCATGGCAA	0.1	-4.123	0.0341	234	0.084	1977.6	0.0726
AR-halfsite(NR)/LNCaP-AR-ChIP-Seq(GSE27824)/Homer	CCAGGAACAG	0.1	-4.12	0.0341	2192	0.7871	20958.7	0.7691
X-box(HTH)/NPC-H3K4me1-ChIP-Seq(GSE16256)/Homer	GGTTGCCATGGCAA	0.1	-3.897	0.0421	131	0.047	1056.7	0.0388
Smad3(MAD)/NPC-Smad3-ChIP-Seq(GSE36673)/Homer	TWGTCTGV	0.1	-3.875	0.0428	1951	0.7005	18572.4	0.6815
SeqBias: A/T bias	WWWWWWWWWW	0.1	-3.853	0.0434	2726	0.9788	26493	0.9722
RUNX-AML(Runt)/CD4+-PolII-ChIP-Seq(Barski et al.)/Homer	GCTGTGGTTW	0.1	-3.769	0.0469	754	0.2707	6900	0.2532
Bcl6(Zf)/Liver-Bcl6-ChIP-Seq(GSE31578)/Homer	NNNCTTTCCAGGAAA	0.1	-3.683	0.0508	1266	0.4546	11855.1	0.435
NF1:FOXA1/LNCAP-FOXA1-ChIP-Seq(GSE27824)/Homer	WNTGTTTRYTTTGGCA	0.1	-3.681	0.0508	62	0.0223	459	0.0168
Atoh1(bHLH)/Cerebellum-Atoh1-ChIP-Seq(GSE22111)/Homer	VNRVCAGCTGGY	0.1	-3.675	0.0508	1062	0.3813	9875.8	0.3624
bHLHE40(HLH)/HepG2-BHLHE40-ChIP-Seq(GSE31477)/Homer	KCACGTGMCN	0.1	-3.595	0.0544	317	0.1138	2777.3	0.1019
Ptf1a(HLH)/Panc1-Ptf1a-ChIP-Seq(GSE47459)/Homer	ACAGCTGTTN	0.1	-3.57	0.0554	1820	0.6535	17306.2	0.6351
NFAT(RHD)/Jurkat-NFATC1-ChIP-Seq(Jolma et al.)/Homer	ATTTTCCATT	0.1	-3.379	0.0666	851	0.3056	7872	0.2889
MafF(bZIP)/HepG2-MafF-ChIP-Seq(GSE31477)/Homer	HWWGTCAGCAWWTTT	0.1	-3.342	0.0687	270	0.0969	2357.2	0.0865
Ap4(HLH)/AML-Tfap4-ChIP-Seq(GSE45738)/Homer	NAHCAGCTGD	0.1	-3.303	0.0709	1094	0.3928	10228.5	0.3753
Six1(Homeobox)/Myoblast-Six1-ChIP-Chip(GSE20150)/Homer	GKVTCADRTTWC	0.1	-3.25	0.0743	269	0.0966	2354.4	0.0864
Smad4(MAD)/ESC-SMAD4-ChIP-Seq(GSE29422)/Homer	VBSYGTCTGG	0.1	-3.242	0.0745	1385	0.4973	13069.4	0.4796
c-Myc(HLH)/LNCAP-cMyc-ChIP-Seq(unpublished)/Homer	VCCACGTG	0.1	-3.241	0.0745	415	0.149	3724.9	0.1367
CRE(bZIP)/Promoter/Homer	CSGTGACGTCAC	0.1	-3.236	0.0745	205	0.0736	1762.4	0.0647
LIN-15B(Zf)/cElegans-L3-LIN15B-ChIP-Seq(modEncode)/Homer	CARTGGAGCGCRYTTGCATT	0.1	-3.213	0.0752	6	0.0022	22.2	0.0008
HRE(HSF)/HepG2-HSF1-ChIP-Seq(GSE31477)/Homer	BSTTCTRGAABVTTCYAGAA	0.1	-3.194	0.0762	207	0.0743	1783.3	0.0654
Unknown-ESC-element/mES-Nanog-ChIP-Seq(GSE11724)/Homer	CACAGCAGGGGG	0.1	-3.167	0.0779	612	0.2197	5602.2	0.2056
E-box/Arabidopsis-Promoters/Homer	GCCACGTG	0.1	-3.165	0.0779	407	0.1461	3655.7	0.1341
MyoD(HLH)/Myotube-MyoD-ChIP-Seq(GSE21614)/Homer	RRCAGCTGYTSY	0.1	-3.153	0.078	750	0.2693	6925.2	0.2541
Pax7-long(Paired/Homeobox)/Myoblast-Pax7-ChIP-Seq(GSE25064)/Homer	TAATCHGATTAC	0.1	-3.108	0.0811	26	0.0093	172.7	0.0063
Egr2/Thymocytes-Egr2-ChIP-Seq(GSE34254)/Homer	NGCGTGGGCGGR	0.1	-3.103	0.0811	200	0.0718	1724.9	0.0633
Unknown5/Drosophila-Promoters/Homer	GCTGATAASV	0.1	-3.046	0.0852	584	0.2097	5347.8	0.1962
Cbf1(bHLH)/Yeast-Cbf1-ChIP-Seq(GSE29506)/Homer	TCACGTGAYH	0.1	-2.967	0.0918	274	0.0984	2421.3	0.0889
Tcfcp2l1(CP2)/mES-Tcfcp2l1-ChIP-Seq(GSE11431)/Homer	NRAACCRGTTYRAACCRGYT	0.1	-2.869	0.1005	185	0.0664	1600.1	0.0587
CArG(MADS)/PUER-Srf-ChIP-Seq(Sullivan et al.)/Homer	CCATATATGGNM	0.1	-2.643	0.1253	336	0.1206	3030.8	0.1112
NFAT:AP1/Jurkat-NFATC1-ChIP-Seq(Jolma et al.)/Homer	SARTGGAAAAWRTGAGTCAB	0.1	-2.634	0.1258	188	0.0675	1643.7	0.0603
E2F1(E2F)/Hela-E2F1-ChIP-Seq(GSE22478)/Homer	CWGGCGGGAA	0.1	-2.588	0.1309	166	0.0596	1442.1	0.0529
SeqBias: GA-repeat	GAGAGAGAGA	0.1	-2.541	0.1364	2544	0.9135	24664.2	0.9051
SeqBias: G/A bias	RRRRRRRRRR	0.1	-2.536	0.1364	2771	0.995	27045	0.9924
Rfx2(HTH)/LoVo-RFX2-ChIP-Seq(GSE49402)/Homer	GTTGCCATGGCAACM	0.1	-2.496	0.1411	92	0.033	768.2	0.0282
E2F7(E2F)/Hela-E2F7-ChIP-Seq(GSE32673)/Homer	VDTTTCCCGCCA	0.1	-2.488	0.1414	86	0.0309	714.4	0.0262
SeqBias: C/A-bias	MMMMMMMMMM	0.1	-2.477	0.1422	2768	0.9939	27011.1	0.9912
SeqBias: polyA-repeat	AAAAAAAAAA	0.1	-2.462	0.1435	2777	0.9971	27117.3	0.9951
E2A-nearPU.1(HLH)/Bcell-PU.1-ChIP-Seq(GSE21512)/Homer	NVCACCTGBN	0.1	-2.453	0.144	1266	0.4546	12014.2	0.4409
Pdx1(Homeobox)/Islet-Pdx1-ChIP-Seq(SRA008281)/Homer	YCATYAATCA	0.1	-2.432	0.1463	849	0.3048	7967.6	0.2924
Nkx3.1(Homeobox)/LNCaP-Nkx3.1-ChIP-Seq(GSE28264)/Homer	AAGCACTTAA	0.1	-2.38	0.1533	1754	0.6298	16808.7	0.6168
RUNX(Runt)/HPC7-Runx1-ChIP-Seq(GSE22178)/Homer	SAAACCACAG	0.1	-2.361	0.1553	737	0.2646	6895.5	0.253
TATA-box/Drosophila-Promoters/Homer	CTATAAAAGCSV	0.1	-2.342	0.1575	96	0.0345	812.2	0.0298
SeqBias: GCW-triplet	GCWGCWGCWGCW	0.1	-2.336	0.1575	2764	0.9925	26970.6	0.9897
Pitx1(Homeobox)/Chicken-Pitx1-ChIP-Seq(GSE38910)/Homer	TAATCCCN	0.1	-2.322	0.1589	2266	0.8136	21889.1	0.8032
Olig2(bHLH)/Neuron-Olig2-ChIP-Seq(GSE30882)/Homer	RCCATMTGTT	1	-2.288	0.1635	1566	0.5623	14974.2	0.5495
Tcf3(HMG)/mES-Tcf3-ChIP-Seq(GSE11724)/Homer	ASWTCAAAGG	1	-2.278	0.1643	288	0.1034	2609.9	0.0958
Mef2c(MADS)/GM12878-Mef2c-ChIP-Seq(GSE32465)/Homer	DCYAAAAATAGM	1	-2.244	0.1691	394	0.1415	3619.8	0.1328
MafA(bZIP)/Islet-MafA-ChIP-Seq(GSE30298)/Homer	TGCTGACTCA	1	-2.2	0.1757	807	0.2898	7593.8	0.2787
GATA:SCL/Ter119-SCL-ChIP-Seq(GSE18720)/Homer	CRGCTGBNGNSNNSAGATAA	1	-2.179	0.1786	136	0.0488	1190.9	0.0437
CRX(Homeobox)/Retina-Crx-ChIP-Seq(GSE20012)/Homer	GCTAATCC	1	-2.176	0.1786	1716	0.6162	16465.3	0.6042
PBX1(Homeobox)/MCF7-PBX1-ChIP-Seq(GSE28007)/Homer	GSCTGTCACTCA	1	-2.098	0.1917	101	0.0363	871.1	0.032
IRF1(IRF)/PBMC-IRF1-ChIP-Seq(GSE43036)/Homer	GAAAGTGAAAGT	1	-2.095	0.1917	156	0.056	1382.3	0.0507
PHA-4(Forkhead)/cElegans-Embryos-PHA4-ChIP-Seq(modEncode)/Homer	KTGTTTGC	1	-2.046	0.1998	2062	0.7404	19899.5	0.7302
TOD6?/SacCer-Promoters/Homer	GCGATGAGMT	1	-2.045	0.1998	176	0.0632	1573.3	0.0577
RFX(HTH)/K562-RFX3-ChIP-Seq(SRA012198)/Homer	CGGTTGCCATGGCAAC	1	-1.998	0.2076	84	0.0302	720.2	0.0264
CLOCK(HLH)/Liver-Clock-ChIP-Seq(GSE39860)/Homer	GHCACGTG	1	-1.941	0.2185	536	0.1925	5015.5	0.184
EGL-5(Homeobox)/cElegans-L3-EGL5-ChIP-Seq(modEncode)/Homer	ATTTAATGGG	1	-1.93	0.2198	1220	0.4381	11648.6	0.4275
GAGA-repeat/SacCer-Promoters/Homer	CTYTCTYTCTCTCTC	1	-1.819	0.2444	2287	0.8212	22164.1	0.8133
PAX5-shortForm(Paired/Homeobox)/GM12878-PAX5-ChIP-Seq(GSE32465)/Homer	GTCACGCTCSCTGM	1	-1.816	0.2444	114	0.0409	1010	0.0371
NPAS2(HLH)/Liver-NPAS2-ChIP-Seq(GSE39860)/Homer	KCCACGTGAC	1	-1.803	0.246	1011	0.363	9635	0.3536
SeqBias: polyC-repeat	CCCCCCCCCC	1	-1.802	0.246	2730	0.9803	26628.6	0.9772
PRDM14(Zf)/H1-PRDM14-ChIP-Seq(GSE22767)/Homer	RGGTCTCTAACY	1	-1.772	0.2513	384	0.1379	3577.8	0.1313
FHY3(FAR1)/Arabidopsis-FHY3-ChIP-Seq(GSE30711)/Homer	HHCACGCGCBTN	1	-1.77	0.2513	208	0.0747	1898.2	0.0697
ZBTB33(Zf)/GM12878-ZBTB33-ChIP-Seq(GSE32465)/Homer	GGVTCTCGCGAGAAC	1	-1.77	0.2513	27	0.0097	213.6	0.0078
EBNA1(EBV virus)/Raji-EBNA1-ChIP-Seq(GSE30709)/Homer	GGYAGCAYDTGCTDCCCNNN	1	-1.748	0.2537	25	0.009	196.5	0.0072
p53(p53)/mES-cMyc-ChIP-Seq(GSE11431)/Homer	ACATGCCCGGGCAT	1	-1.699	0.265	22	0.0079	171	0.0063
Unknown2/Arabidopsis-Promoters/Homer	AAACGACGTCGTTTT	1	-1.679	0.2693	5	0.0018	28.4	0.001
LXRE(NR/DR4)/BLRP(RAW)-LXRb-ChIP-Seq(GSE21512)/Homer	RGGTTACTANAGGTCA	1	-1.667	0.2712	58	0.0208	498.8	0.0183
Mouse_Recombination_Hotspot/Testis-DMC1-ChIP-Seq(GSE24438)/Homer	ACTYKNATTCGTGNTACTTC	1	-1.626	0.2812	66	0.0237	574.6	0.0211
Lhx3(Homeobox)/Neuron-Lhx3-ChIP-Seq(GSE31456)/Homer	ADBTAATTAR	1	-1.617	0.2823	1334	0.479	12818.9	0.4704
DREF/Drosophila-Promoters/Homer	AVYTATCGATAD	1	-1.558	0.2982	11	0.0039	79.5	0.0029
Isl1(Homeobox)/Neuron-Isl1-ChIP-Seq(GSE31456)/Homer	CTAATKGV	1	-1.475	0.3225	1512	0.5429	14588.4	0.5353
SeqBias: CG-repeat	CGCGCGCGCG	1	-1.452	0.3285	647	0.2323	6161.9	0.2261
Srebp2(HLH)/HepG2-Srebp2-ChIP-Seq(GSE31477)/Homer	CGGTCACSCCAC	1	-1.391	0.3474	144	0.0517	1325.6	0.0486
Pho4(bHLH)/Yeast-Pho4-ChIP-Seq(GSE29506)/Homer	AAGCACGTGBGD	1	-1.294	0.3811	183	0.0657	1707.5	0.0627
GFX(?)/Promoter/Homer	ATTCTCGCGAGA	1	-1.291	0.3811	7	0.0025	50.8	0.0019
RUNX1(Runt)/Jurkat-RUNX1-ChIP-Seq(GSE29180)/Homer	AAACCACARM	1	-1.289	0.3811	984	0.3533	9470	0.3475
REST-NRSF(Zf)/Jurkat-NRSF-ChIP-Seq/Homer	GGMGCTGTCCATGGTGCTGA	1	-1.28	0.3811	13	0.0047	103.7	0.0038
NFkB-p50,p52(RHD)/p50-ChIP-Chip(Schreiber et al.)/Homer	GGGGGAATCCCC	1	-1.275	0.3815	122	0.0438	1126.6	0.0413
DPL-1(E2F)/cElegans-Adult-ChIP-Seq(modEncode)/Homer	TAGCGCGC	1	-1.26	0.3856	408	0.1465	3879.6	0.1424
Unknown3/Arabidopsis-Promoters/Homer	AYTAAACCGG	1	-1.258	0.3856	143	0.0513	1328.9	0.0488
GATA-IR3(Zf)/iTreg-Gata3-ChIP-Seq(GSE20898)/Homer	NNNNNBAGATAWYATCTVHN	1	-1.206	0.4033	134	0.0481	1247.4	0.0458
HOXA2(Homeobox)/mES-Hoxa2-ChIP-Seq(Donaldson et al.)/Homer	GYCATCMATCAT	1	-1.192	0.4071	99	0.0355	914.8	0.0336
Nr5a2(NR)/Pancreas-LRH1-ChIP-Seq(GSE34295)/Homer	BTCAAGGTCA	1	-1.165	0.4163	777	0.279	7479.6	0.2745
HIF-1a(HLH)/MCF7-HIF1a-ChIP-Seq(GSE28352)/Homer	TACGTGCV	1	-1.161	0.4163	209	0.075	1972.8	0.0724
Ik-1	NHTTGGGAATRCC	1	-1.062	0.4574	2780	0.9982	27184.8	0.9976
PR(NR)/T47D-PR-ChIP-Seq(GSE31130)/Homer	VAGRACAKNCTGTBC	1	-1.06	0.4574	1682	0.6039	16347.4	0.5999
Pax8(Paired/Homeobox)/Thyroid-Pax8-ChIP-Seq(GSE26938)/Homer	GTCATGCHTGRCTGS	1	-1.019	0.4733	359	0.1289	3444.1	0.1264
NRF1(NRF)/MCF7-NRF1-ChIP-Seq(Unpublished)/Homer	CTGCGCATGCGC	1	-0.964	0.4981	90	0.0323	848.8	0.0311
PAX5(Paired/Homeobox)/GM12878-PAX5-ChIP-Seq(GSE32465)/Homer	GCAGCCAAGCRTGACH	1	-0.9159	0.5204	376	0.135	3628.2	0.1331
Reverb(NR/DR2)/BLRP(RAW)-Reverba-ChIP-Seq(GSE45914)/Homer	GTRGGTCASTGGGTCA	1	-0.896	0.5286	148	0.0531	1416.5	0.052
MafK(bZIP)/C2C12-MafK-ChIP-Seq(GSE36030)/Homer	GCTGASTCAGCA	1	-0.8592	0.5461	247	0.0887	2383.6	0.0875
Unknown3/Drosophila-Promoters/Homer	ACVAKCTGGCAGCGC	1	-0.8502	0.5486	81	0.0291	772.4	0.0283
HIF2a(HLH)/785_O-HIF2a-ChIP-Seq(GSE34871)/Homer	GCACGTACCC	1	-0.8441	0.5497	283	0.1016	2736.5	0.1004
RBPJ:Ebox/Panc1-Rbpj1-ChIP-Seq(GSE47459)/Homer	GGGRAARRGRMCAGMTG	1	-0.8272	0.5567	370	0.1329	3587.1	0.1316
REB1/SacCer-Promoters/Homer	KCCGGGTAAYRR	1	-0.7514	0.598	158	0.0567	1533.7	0.0563
p63(p53)/Keratinocyte-p63-ChIP-Seq(GSE17611)/Homer	NNDRCATGYCYNRRCATGYH	1	-0.7189	0.6152	366	0.1314	3571.6	0.1311
Lhx2(Homeobox)/HFSC-Lhx2-ChIP-Seq(GSE48068)/Homer	TAATTAGN	1	-0.6879	0.632	932	0.3346	9116.4	0.3345
Hoxb4(Homeobox)/ES-Hoxb4-ChIP-Seq(GSE34014)/Homer	TGATTRATGGCY	1	-0.6861	0.632	186	0.0668	1817.6	0.0667
VDR(NR/DR3)/GM10855-VDR+vitD-ChIP-Seq(GSE22484)/Homer	ARAGGTCANWGAGTTCANNN	1	-0.6216	0.6697	215	0.0772	2113.1	0.0775
EFL-1(E2F)/cElegans-L1-EFL1-ChIP-Seq(modEncode)/Homer	TGCAARYGCGCTCYA	1	-0.5769	0.6974	14	0.005	139.6	0.0051
Unknown1/Arabidopsis-Promoters/Homer	RGGGTAWWWTHGTAA	1	-0.5588	0.7073	82	0.0294	815.4	0.0299
RUNX2(Runt)/PCa-RUNX2-ChIP-Seq(GSE33889)/Homer	NWAACCACADNN	1	-0.5352	0.7212	825	0.2962	8121.2	0.298
GATA-DR4(Zf)/iTreg-Gata3-ChIP-Seq(GSE20898)/Homer	AGATGKDGAGATAAG	1	-0.5226	0.7274	82	0.0294	820.9	0.0301
Znf263(Zf)/K562-Znf263-ChIP-Seq(GSE31477)/Homer	CVGTSCTCCC	1	-0.4801	0.756	1381	0.4959	13589.7	0.4987
ARE(NR)/LNCAP-AR-ChIP-Seq(GSE27824)/Homer	RGRACASNSTGTYCYB	1	-0.4712	0.7596	297	0.1066	2955.1	0.1084
PRDM9(Zf)/Testis-DMC1-ChIP-Seq(GSE35498)/Homer	ADGGYAGYAGCATCT	1	-0.4694	0.7596	403	0.1447	4000.7	0.1468
PCF/Arabidopsis-Promoters/Homer	NNWWWTGGGCYTDDN	1	-0.4449	0.7736	234	0.084	2340.9	0.0859
PU.1-IRF(ETS:IRF)/Bcell-PU.1-ChIP-Seq(GSE21512)/Homer	MGGAAGTGAAAC	1	-0.4238	0.787	1176	0.4223	11608.9	0.426
Nkx2.1(Homeobox)/LungAC-Nkx2.1-ChIP-Seq(GSE43252)/Homer	RSCACTYRAG	1	-0.4153	0.7906	1911	0.6862	18796.7	0.6898
Tal1	CATCTG	1	-0.3938	0.8046	1257	0.4513	12416.1	0.4556
PIF5ox(bHLH)/Arabidopsis-PIF5ox-ChIP-Seq(GSE35062)/Homer	BCACGTGVDN	1	-0.3865	0.8073	909	0.3264	9008.7	0.3306
GEI-11(Myb?)/cElegans-L4-GEI11-ChIP-Seq(modEncode)/Homer	CCGACAYYTYACGGG	1	-0.3639	0.8226	35	0.0126	370.8	0.0136
Oct4(POU/Homeobox)/mES-Oct4-ChIP-Seq(GSE11431)/Homer	ATTTGCATAW	1	-0.3427	0.8369	421	0.1512	4223.5	0.155
Arnt:Ahr(bHLH)/MCF7-Arnt-ChIP-Seq(Lo et al.)/Homer	TBGCACGCAA	1	-0.3414	0.8369	539	0.1935	5389.9	0.1978
p53(p53)/Saos-p53-ChIP-Seq(GSE15780)/Homer	RRCATGYCYRGRCATGYYYN	1	-0.3239	0.843	97	0.0348	1005.2	0.0369
p53(p53)/Saos-p53-ChIP-Seq/Homer	RRCATGYCYRGRCATGYYYN	1	-0.3239	0.843	97	0.0348	1005.2	0.0369
Nkx2.5(Homeobox)/HL1-Nkx2.5.biotin-ChIP-Seq(GSE21529)/Homer	RRSCACTYAA	1	-0.3077	0.8534	1650	0.5925	16306.6	0.5984
CES-1(Homeobox)/cElegans-L1-CES1-ChIP-Seq(modEncode)/Homer	AAATTSAATTTN	1	-0.3013	0.8556	458	0.1645	4607.2	0.1691
PAX3:FKHR-fusion(Paired/Homeobox)/Rh4-PAX3:FKHR-ChIP-Seq(GSE19063)/Homer	ACCRTGACTAATTNN	1	-0.3009	0.8556	202	0.0725	2064.7	0.0758
ERE(NR/IR3)/MCF7-ERa-ChIP-Seq(Unpublished)/Homer	VAGGTCACNSTGACC	1	-0.2843	0.8637	300	0.1077	3047.9	0.1118
Nr5a2(NR)/mES-Nr5a2-ChIP-Seq(GSE19019)/Homer	BTCAAGGTCA	1	-0.266	0.8764	585	0.2101	5881.7	0.2158
LIN-39(Homeobox)/cElegans.L3-LIN39-ChIP-Seq(modEncode)/Homer	ATGATTRATG	1	-0.2611	0.8774	962	0.3454	9599.2	0.3523
BMAL1(HLH)/Liver-Bmal1-ChIP-Seq(GSE39860)/Homer	GNCACGTG	1	-0.2417	0.8911	1405	0.5045	13956.7	0.5122
Tbx20(T-box)/Heart-Tbx20-ChIP-Seq(GSE29636)/Homer	GGTGYTGACAGS	1	-0.2315	0.8969	224	0.0804	2310.1	0.0848
Unknown6/Drosophila-Promoters/Homer	AATTTTAAAA	1	-0.2118	0.9114	704	0.2528	7091.7	0.2602
Rfx5(HTH)/GM12878-Rfx5-ChIP-Seq(GSE31477)/Homer	SCCTAGCAACAG	1	-0.2036	0.9155	344	0.1235	3524	0.1293
GLI3(Zf)/GLI3-ChIP-Chip(GSE11077)/Homer	CGTGGGTGGTCC	1	-0.1942	0.9207	132	0.0474	1397.3	0.0513
SeqBias: CA-repeat	CACACACACA	1	-0.174	0.9361	2401	0.8621	23670.6	0.8686
ZNF711(Zf)/SH-SY5Y-ZNF711-ChIP-Seq(GSE20673)/Homer	AGGCCTAG	1	-0.1367	0.9681	1282	0.4603	12846.8	0.4714
Unknown2/Drosophila-Promoters/Homer	CATCMCTA	1	-0.1278	0.9731	1113	0.3996	11198.6	0.4109
ZFX(Zf)/mES-Zfx-ChIP-Seq(GSE11431)/Homer	AGGCCTRG	1	-0.1272	0.9731	1039	0.3731	10471.2	0.3843
Egr1(Zf)/K562-Egr1-ChIP-Seq(GSE32465)/Homer	TGCGTGGGYG	1	-0.1203	0.9734	623	0.2237	6367	0.2336
GFY-Staf/Promoters/Homer	RACTACAATTCCCAGAAKGC	1	-0.11	0.98	46	0.0165	538.3	0.0198
Unknown4/Arabidopsis-Promoters/Homer	CKTCKTCTTY	1	-0.1021	0.9842	862	0.3095	8757.1	0.3213
PRDM1/BMI1(Zf)/Hela-PRDM1-ChIP-Seq(GSE31477)/Homer	ACTTTCACTTTC	1	-0.09097	0.9916	557	0.2	5744.5	0.2108
NFY(CCAAT)/Promoter/Homer	RGCCAATSRG	1	-0.07934	0.9996	734	0.2636	7522.5	0.276
NRF1/Promoter/Homer	STGCGCATGCGC	1	-0.05919	1	124	0.0445	1393.9	0.0512
Oct2(POU/Homeobox)/Bcell-Oct2-ChIP-Seq(GSE21512)/Homer	ATATGCAAAT	1	-0.04378	1	241	0.0865	2624.6	0.0963
SFP1/SacCer-Promoters/Homer	DDAAAAATTTTY	1	-0.02999	1	61	0.0219	754.6	0.0277
ZNF143|STAF(Zf)/CUTLL-ZNF143-ChIP-Seq(GSE29600)/Homer	ATTTCCCAGVAKSCY	1	-0.0299	1	393	0.1411	4206.3	0.1544
bZIP:IRF/Th17-BatF-ChIP-Seq(GSE39756)/Homer	NAGTTTCABTHTGACTNW	1	-0.02888	1	436	0.1566	4645.7	0.1705
Phox2a(Homeobox)/Neuron-Phox2a-ChIP-Seq(GSE31456)/Homer	YTAATYNRATTA	1	-0.02815	1	306	0.1099	3324.2	0.122
Pax7-longest(Paired/Homeobox)/Myoblast-Pax7-ChIP-Seq(GSE25064)/Homer	NTAATTDGCYAATTANNWWD	1	-0.0198	1	16	0.0057	251.5	0.0092
T1ISRE(IRF)/Ifnb-Exp/Homer	ACTTTCGTTTCT	1	-0.01975	1	8	0.0029	148.2	0.0054
n-Myc(HLH)/mES-nMyc-ChIP-Seq(GSE11431)/Homer	VRCCACGTGG	1	-0.01964	1	610	0.219	6435.7	0.2362
YY1(Zf)/Promoter/Homer	CAAGATGGCGGC	1	-0.005408	1	50	0.018	690.5	0.0253
GAGA-repeat/Arabidopsis-Promoters/Homer	CTCTCTCTCY	1	-0.004566	1	1155	0.4147	11996.5	0.4402
GATA-DR8(Zf)/iTreg-Gata3-ChIP-Seq(GSE20898)/Homer	AGATSTNDNNDSAGATAASN	1	-0.003579	1	66	0.0237	887.2	0.0326
Pax7(Paired/Homeobox)/Myoblast-Pax7-ChIP-Seq(GSE25064)/Homer	TAATCAATTA	1	-0.003579	1	66	0.0237	887.5	0.0326
OCT4-SOX2-TCF-NANOG((POU/Homeobox/HMG)/mES-Oct4-ChIP-Seq(GSE11431)/Homer	ATTTGCATAACAATG	1	-0.00258	1	147	0.0528	1797.2	0.066
SeqBias: TA-repeat	TATATATATA	1	-0.001856	1	1759	0.6316	17956.6	0.6589
SEP3(MADS)/Arabidoposis-Flower-Sep3-ChIP-Seq/Homer	CCAAAAAGGG	1	-0.001547	1	980	0.3519	10358.7	0.3801
FOXA1:AR/LNCAP-AR-ChIP-Seq(GSE27824)/Homer	AGTAAACAAAAAAGAACAND	1	-0.0004	1	59	0.0212	872.2	0.032
TATA-box/SacCer-Promoters/Homer	BBHWTATATA	1	-0.000113	1	467	0.1677	5342.5	0.196
Max(HLH)/K562-Max-ChIP-Seq(GSE31477)/Homer	RCCACGTGGYYN	1	-8.2e-05	1	582	0.209	6548.4	0.2403
Pho2(bHLH)/Yeast-Pho2-ChIP-Seq(GSE29506)/Homer	CCCACGTGCT	1	-5.1e-05	1	341	0.1224	4061.2	0.149
c-Myc/mES-cMyc-ChIP-Seq(GSE11431)/Homer	VVCCACGTGG	1	-3e-05	1	421	0.1512	4931.5	0.181
RLR1?/SacCer-Promoters/Homer	WTTTTCYYTTTT	1	0	1	586	0.2104	7316.3	0.2685
RARg(NR)/ES-RARg-ChIP-Seq(GSE30538)/Homer	AGGTCAAGGTCA	1	0	1	43	0.0154	1068.9	0.0392

## Sheet: Colon UpvsBkgd
TABLE S13: Motif prediction in DHS near genes consistently up or down-regulated in colonized vs. germ-free ileum and colon
Motif Name	Consensus	P-value	Log P-value	q-value (Benjamini)	# of Target Sequences with Motif(of 2234)	% of Target Sequences with Motif	# of Background Sequences with Motif(of 22171)	% of Background Sequences with Motif
CTCF(Zf)/CD4+-CTCF-ChIP-Seq(Barski et al.)/Homer	AYAGTGCCMYCTRGTGGCCA	1e-91	-211.8	0	438	0.1961	1319.2	0.0595
BORIS(Zf)/K562-CTCFL-ChIP-Seq(GSE32465)/Homer	CNNBRGCGCCCCCTGSTGGC	1e-61	-141.4	0	476	0.2131	1983.7	0.0895
caudal(Homeobox)/Drosophila-Embryos-ChIP-Chip(modEncode)/Homer	GGYCATAAAW	1e-16	-37.97	0	673	0.3013	4895.6	0.2209
NF1(CTF)/LNCAP-NF1-ChIP-Seq(Unpublished)/Homer	CYTGGCABNSTGCCAR	1e-16	-37.22	0	505	0.2261	3444.7	0.1554
ELF5(ETS)/T47D-ELF5-ChIP-Seq(GSE30407)/Homer	ACVAGGAAGT	1e-13	-30.82	0	768	0.3438	5940.1	0.268
Stat3(Stat)/mES-Stat3-ChIP-Seq(GSE11431)/Homer	CTTCCGGGAA	1e-13	-29.99	0	548	0.2453	3978.6	0.1795
Sp1(Zf)/Promoter/Homer	GGCCCCGCCCCC	1e-12	-29.51	0	301	0.1347	1895.4	0.0855
Klf4(Zf)/mES-Klf4-ChIP-Seq(GSE11431)/Homer	GCCACACCCA	1e-12	-29.16	0	517	0.2314	3726.8	0.1682
BATF(bZIP)/Th17-BATF-ChIP-Seq(GSE39756)/Homer	DATGASTCAT	1e-12	-29.03	0	596	0.2668	4428.7	0.1998
GABPA(ETS)/Jurkat-GABPa-ChIP-Seq(GSE17954)/Homer	RACCGGAAGT	1e-12	-28.16	0	880	0.3939	7063.6	0.3187
EKLF(Zf)/Erythrocyte-Klf1-ChIP-Seq(GSE20478)/Homer	NWGGGTGTGGCY	1e-11	-27.63	0	320	0.1432	2084.4	0.0941
ERG(ETS)/VCaP-ERG-ChIP-Seq(GSE14097)/Homer	ACAGGAAGTG	1e-11	-27.12	0	1265	0.5662	10833.3	0.4888
Atf3(bZIP)/GBM-ATF3-ChIP-Seq(GSE33912)/Homer	DATGASTCATHN	1e-11	-26.92	0	576	0.2578	4305.3	0.1943
HNF4a(NR/DR1)/HepG2-HNF4a-ChIP-Seq(GSE25021)/Homer	CARRGKBCAAAGTYCA	1e-11	-26.78	0	570	0.2551	4255.6	0.192
EHF(ETS)/LoVo-EHF-ChIP-Seq(GSE49402)/Homer	AVCAGGAAGT	1e-11	-26.28	0	1114	0.4987	9372.9	0.4229
STAT4(Stat)/CD4-Stat4-ChIP-Seq(GSE22104)/Homer	NYTTCCWGGAAR	1e-11	-25.63	0	845	0.3782	6814.8	0.3075
NFkB-p65-Rel(RHD)/LPS-exp(GSE23622)/Homer	GGAAATTCCC	1e-11	-25.47	0	85	0.038	347	0.0157
Fli1(ETS)/CD8-FLI-ChIP-Seq(GSE20898)/Homer	NRYTTCCGGH	1e-10	-25.15	0	968	0.4333	7998.8	0.3609
ISRE(IRF)/ThioMac-LPS-exp(GSE23622)/HOMER	AGTTTCASTTTC	1e-10	-24.91	0	102	0.0457	461.2	0.0208
KLF5(Zf)/LoVo-KLF5-ChIP-Seq(GSE49402)/Homer	DGGGYGKGGC	1e-10	-24.23	0	1121	0.5018	9513.1	0.4292
Unknown(Homeobox)/Limb-p300-ChIP-Seq/Homer	SSCMATWAAA	1e-10	-23.95	0	572	0.256	4351.2	0.1963
Elk1(ETS)/Hela-Elk1-ChIP-Seq(GSE31477)/Homer	HACTTCCGGY	1e-10	-23.4	0	563	0.252	4287	0.1934
AP-1(bZIP)/ThioMac-PU.1-ChIP-Seq(GSE21512)/Homer	VTGACTCATC	1e-10	-23.33	0	640	0.2865	4986.8	0.225
ETS1(ETS)/Jurkat-ETS1-ChIP-Seq(GSE17954)/Homer	ACAGGAAGTG	1e-09	-22.69	0	943	0.4221	7845.5	0.354
EWS:ERG-fusion(ETS)/CADO_ES1-EWS:ERG-ChIP-Seq(SRA014231)/Homer	ATTTCCTGTN	1e-09	-22.45	0	687	0.3075	5445.8	0.2457
ELF1(ETS)/Jurkat-ELF1-ChIP-Seq(SRA014231)/Homer	AVCCGGAAGT	1e-09	-22.37	0	545	0.244	4154	0.1874
NFkB-p65(RHD)/GM12787-p65-ChIP-Seq(GSE19485)/Homer	WGGGGATTTCCC	1e-09	-21.47	0	522	0.2337	3974.9	0.1794
Stat3+il21(Stat)/CD4-Stat3-ChIP-Seq(GSE19198)/Homer	SVYTTCCNGGAARB	1e-08	-20.67	0	691	0.3093	5541.7	0.2501
EWS:FLI1-fusion(ETS)/SK_N_MC-EWS:FLI1-ChIP-Seq(SRA014231)/Homer	VACAGGAAAT	1e-08	-20.28	0	587	0.2628	4598.9	0.2075
Fox:Ebox(Forkhead:HLH)/Panc1-Foxa2-ChIP-Seq(GSE47459)/Homer	NNNVCTGWGYAAACASN	1e-08	-20.19	0	864	0.3868	7183.7	0.3241
ETV1(ETS)/GIST48-ETV1-ChIP-Seq(GSE22441)/Homer	AACCGGAAGT	1e-08	-19.9	0	1141	0.5107	9875.9	0.4456
Elk4(ETS)/Hela-Elk4-ChIP-Seq(GSE31477)/Homer	NRYTTCCGGY	1e-08	-19.9	0	527	0.2359	4066.4	0.1835
Jun-AP1(bZIP)/K562-cJun-ChIP-Seq(GSE31477)/Homer	GATGASTCATCN	1e-08	-19.49	0	257	0.115	1727.2	0.0779
Bach2(bZIP)/OCILy7-Bach2-ChIP-Seq(GSE44420)/Homer	TGCTGAGTCA	1e-07	-17.53	0	213	0.0953	1405.6	0.0634
IRF1(IRF)/PBMC-IRF1-ChIP-Seq(GSE43036)/Homer	GAAAGTGAAAGT	1e-07	-17.53	0	178	0.0797	1122.4	0.0506
Ets1-distal(ETS)/CD4+-PolII-ChIP-Seq(Barski et al.)/Homer	MACAGGAAGT	1e-07	-17.51	0	353	0.158	2592.3	0.117
IRF2(IRF)/Erythroblas-IRF2-ChIP-Seq(GSE36985)/Homer	GAAASYGAAASY	1e-07	-16.37	0	134	0.06	796.7	0.036
STAT1(Stat)/HelaS3-STAT1-ChIP-Seq(GSE12782)/Homer	NATTTCCNGGAAAT	1e-07	-16.33	0	323	0.1446	2363.7	0.1067
NF1-halfsite(CTF)/LNCaP-NF1-ChIP-Seq(Unpublished)/Homer	YTGCCAAG	1e-07	-16.21	0	1277	0.5716	11383.1	0.5136
BMYB(HTH)/Hela-BMYB-ChIPSeq(GSE27030)/Homer	NHAACBGYYV	1e-06	-15.95	0	1081	0.4839	9455.3	0.4266
Foxa2(Forkhead)/Liver-Foxa2-ChIP-Seq(GSE25694)/Homer	CYTGTTTACWYW	1e-06	-15.72	0	675	0.3021	5573.7	0.2515
PU.1(ETS)/ThioMac-PU.1-ChIP-Seq(GSE21512)/Homer	AGAGGAAGTG	1e-06	-15.51	0	537	0.2404	4303.6	0.1942
STAT6/Macrophage-Stat6-ChIP-Seq(GSE38377)/Homer	TTCCKNAGAA	1e-06	-14.65	0	503	0.2252	4023.6	0.1816
ETS(ETS)/Promoter/Homer	AACCGGAAGT	1e-06	-14.59	0	358	0.1603	2720.8	0.1228
Tlx?(NR)/NPC-H3K4me1-ChIP-Seq(GSE16256)/Homer	CTGGCAGSCTGCCA	1e-06	-13.83	0	500	0.2238	4026.6	0.1817
Tbx5(T-box)/HL1-Tbx5.biotin-ChIP-Seq(GSE21529)/Homer	AGGTGTCA	1e-05	-13.79	0	1702	0.7619	15844.9	0.715
Rbpj1(?)/Panc1-Rbpj1-ChIP-Seq(GSE47459)/Homer	HTTTCCCASG	1e-05	-13.79	0	1153	0.5161	10267	0.4633
Foxo1(Forkhead)/RAW-Foxo1-ChIP-Seq(Fan et al.)/Homer	CTGTTTAC	1e-05	-13.76	0	1279	0.5725	11520.5	0.5198
Cdx2(Homeobox)/mES-Cdx2-ChIP-Seq(GSE14586)/Homer	GYMATAAAAH	1e-05	-13.18	0	567	0.2538	4669.7	0.2107
Gata2(Zf)/K562-GATA2-ChIP-Seq(GSE18829)/Homer	BBCTTATCTS	1e-05	-12.94	0	570	0.2551	4707.3	0.2124
SPDEF(ETS)/VCaP-SPDEF-ChIP-Seq(SRA014231)/Homer	ASWTCCTGBT	1e-05	-12.9	0	901	0.4033	7848.9	0.3542
STAT5(Stat)/mCD4+-Stat5-ChIP-Seq(GSE12346)/Homer	RTTTCTNAGAAA	1e-05	-12.69	0	356	0.1594	2763	0.1247
HOXA9(Homeobox)/HSC-Hoxa9-ChIP-Seq(GSE33509)/Homer	GGCCATAAATCA	1e-05	-12.6	0	522	0.2337	4276.9	0.193
EBF(EBF)/proBcell-EBF-ChIP-Seq(GSE21978)/Homer	DGTCCCYRGGGA	1e-05	-12.36	0	284	0.1271	2136.3	0.0964
Hnf1(Homeobox)/Liver-Foxa2-Chip-Seq(GSE25694)/Homer	GGTTAAWCATTAA	1e-05	-12.08	0	121	0.0542	767.5	0.0346
Gata1(Zf)/K562-GATA1-ChIP-Seq(GSE18829)/Homer	SAGATAAGRV	1e-05	-11.9	0	511	0.2287	4203.5	0.1897
GATA3(Zf)/iTreg-Gata3-ChIP-Seq(GSE20898)/Homer	AGATAASR	1e-05	-11.59	0	1049	0.4696	9356.7	0.4222
E2F4(E2F)/K562-E2F4-ChIP-Seq(GSE31477)/Homer	GGCGGGAAAH	0.0001	-11.19	0.0001	311	0.1392	2412.6	0.1089
TR4(NR/DR1)/Hela-TR4-ChIP-Seq(GSE24685)/Homer	GAGGTCAAAGGTCA	0.0001	-11.05	0.0001	165	0.0739	1150	0.0519
HOXD13(Homeobox)/Chicken-Hoxd13-ChIP-Seq(GSE38910)/Homer	NCYAATAAAA	0.0001	-10.85	0.0001	777	0.3478	6759.4	0.305
NF1:FOXA1/LNCAP-FOXA1-ChIP-Seq(GSE27824)/Homer	WNTGTTTRYTTTGGCA	0.0001	-10.75	0.0001	64	0.0286	349.1	0.0158
CEBP:AP1(bZIP)/ThioMac-CEBPb-ChIP-Seq(GSE21512)/Homer	DRTGTTGCAA	0.0001	-10.33	0.0002	544	0.2435	4579	0.2066
Gata4(Zf)/Heart-Gata4-ChIP-Seq(GSE35151)/Homer	NBWGATAAGR	0.0001	-10.31	0.0002	782	0.35	6835.1	0.3084
Tcf12(HLH)/GM12878-Tcf12-ChIP-Seq(GSE32465)/Homer	VCAGCTGYTG	0.0001	-10.09	0.0002	826	0.3697	7270.1	0.328
STAT6(Stat)/CD4-Stat6-ChIP-Seq(GSE22104)/Homer	ABTTCYYRRGAA	0.0001	-10.07	0.0002	469	0.2099	3893.4	0.1757
E2F6(E2F)/Hela-E2F6-ChIP-Seq(GSE31477)/Homer	GGCGGGAARN	0.0001	-9.394	0.0004	399	0.1786	3277.7	0.1479
E2A(HLH)/proBcell-E2A-ChIP-Seq(GSE21978)/Homer	DNRCAGCTGY	0.001	-9.201	0.0005	1116	0.4996	10153.5	0.4581
Myf5(bHLH)/GM-Myf5-ChIP-Seq(GSE24852)/Homer	BAACAGCTGT	0.001	-9.161	0.0005	651	0.2914	5646.9	0.2548
E2F1(E2F)/Hela-E2F1-ChIP-Seq(GSE22478)/Homer	CWGGCGGGAA	0.001	-8.932	0.0006	175	0.0783	1289.8	0.0582
NeuroD1(bHLH)/Islet-NeuroD1-ChIP-Seq(GSE30298)/Homer	GCCATCTGTT	0.001	-8.856	0.0006	767	0.3433	6772.6	0.3056
PPARE(NR/DR1)/3T3L1-Pparg-ChIP-Seq(GSE13511)/Homer	TGACCTTTGCCCCA	0.001	-8.766	0.0007	867	0.3881	7743.4	0.3494
Unknown-ESC-element/mES-Nanog-ChIP-Seq(GSE11724)/Homer	CACAGCAGGGGG	0.001	-8.667	0.0007	594	0.2659	5132.2	0.2316
E2F7(E2F)/Hela-E2F7-ChIP-Seq(GSE32673)/Homer	VDTTTCCCGCCA	0.001	-8.524	0.0008	98	0.0439	651.9	0.0294
Nur77(NR)/K562-NR4A1-ChIP-Seq(GSE31363)/Homer	TGACCTTTNCNT	0.001	-8.369	0.0009	190	0.085	1436.3	0.0648
Tbet(T-box)/CD8-Tbet-ChIP-Seq(GSE33802)/Homer	AGGTGTGAAM	0.001	-8.364	0.0009	843	0.3774	7535.2	0.34
AMYB(HTH)/Testes-AMYB-ChIP-Seq(GSE44588)/Homer	TGGCAGTTGG	0.001	-8.302	0.001	1087	0.4866	9924.3	0.4478
ETS:RUNX/Jurkat-RUNX1-ChIP-Seq(GSE17954)/Homer	RCAGGATGTGGT	0.001	-7.759	0.0017	122	0.0546	868.5	0.0392
Eomes(T-box)/H9-Eomes-ChIP-Seq(GSE26097)/Homer	ATTAACACCT	0.001	-7.466	0.0022	1333	0.5967	12427	0.5607
CEBP(bZIP)/CEBPb-ChIP-Seq(GSE21512)/Homer	ATTGCGCAAC	0.001	-7.296	0.0026	475	0.2126	4084.8	0.1843
FOXA1(Forkhead)/LNCAP-FOXA1-ChIP-Seq(GSE27824)/Homer	WAAGTAAACA	0.001	-7.279	0.0026	874	0.3912	7906.6	0.3568
T1ISRE(IRF)/Ifnb-Exp/Homer	ACTTTCGTTTCT	0.001	-7.206	0.0028	26	0.0116	120.9	0.0055
Ptf1a(HLH)/Panc1-Ptf1a-ChIP-Seq(GSE47459)/Homer	ACAGCTGTTN	0.001	-7.183	0.0028	1541	0.6898	14547.1	0.6564
CTCF-SatelliteElement/CD4+-CTCF-ChIP-Seq(Barski et al.)/Homer	TGCAGTTCCMVNWRTGGCCA	0.001	-7.146	0.0029	30	0.0134	148.1	0.0067
RXR(NR/DR1)/3T3L1-RXR-ChIP-Seq(GSE13511)/Homer	TAGGGCAAAGGTCA	0.001	-7.097	0.003	969	0.4338	8846.8	0.3992
MyoG(HLH)/C2C12-MyoG-ChIP-Seq(GSE36024)/Homer	AACAGCTG	0.001	-7.053	0.0031	887	0.397	8048.9	0.3632
FOXA1(Forkhead)/MCF7-FOXA1-ChIP-Seq(GSE26831)/Homer	WAAGTAAACA	0.001	-6.925	0.0035	750	0.3357	6728.7	0.3036
Isl1(Homeobox)/Neuron-Isl1-ChIP-Seq(GSE31456)/Homer	CTAATKGV	0.01	-6.895	0.0035	1246	0.5577	11598.3	0.5233
Atoh1(bHLH)/Cerebellum-Atoh1-ChIP-Seq(GSE22111)/Homer	VNRVCAGCTGGY	0.01	-6.894	0.0035	920	0.4118	8381.6	0.3782
Mef2a(MADS)/HL1-Mef2a.biotin-ChIP-Seq(GSE21529/Homer	CYAAAAATAG	0.01	-6.887	0.0035	321	0.1437	2672.4	0.1206
E2A-nearPU.1(HLH)/Bcell-PU.1-ChIP-Seq(GSE21512)/Homer	NVCACCTGBN	0.01	-6.479	0.0052	1118	0.5004	10358.6	0.4674
TEAD(TEA)/Fibroblast-PU.1-ChIP-Seq(Unpublished)/Homer	YCWGGAATGY	0.01	-6.346	0.0058	551	0.2466	4858.4	0.2192
Rfx2(HTH)/LoVo-RFX2-ChIP-Seq(GSE49402)/Homer	GTTGCCATGGCAACM	0.01	-6.048	0.0078	100	0.0448	726.6	0.0328
Unknown3/Drosophila-Promoters/Homer	ACVAKCTGGCAGCGC	0.01	-5.933	0.0086	94	0.0421	678.4	0.0306
SCL(HLH)/HPC7-Scl-ChIP-Seq(GSE13511)/Homer	AVCAGCTG	0.01	-5.867	0.0091	1854	0.8299	17857.7	0.8058
Hoxc9(Homeobox)/Ainv15-Hoxc9-ChIP-Seq(GSE21812)/Homer	GGCCATAAATCA	0.01	-5.787	0.0098	376	0.1683	3239.1	0.1462
REB1/SacCer-Promoters/Homer	KCCGGGTAAYRR	0.01	-5.757	0.01	162	0.0725	1277.7	0.0577
FOXP1(Forkhead)/H9-FOXP1-ChIP-Seq(GSE31006)/Homer	NYYTGTTTACHN	0.01	-5.692	0.0105	361	0.1616	3104.4	0.1401
Bach1(bZIP)/K562-Bach1-ChIP-Seq(GSE31477)/Homer	AWWNTGCTGAGTCAT	0.01	-5.691	0.0105	60	0.0269	400.6	0.0181
PU.1-IRF(ETS:IRF)/Bcell-PU.1-ChIP-Seq(GSE21512)/Homer	MGGAAGTGAAAC	0.01	-5.644	0.0108	1042	0.4664	9673.1	0.4365
Initiator/Drosophila-Promoters/Homer	NTCAGTYG	0.01	-5.612	0.0111	1410	0.6312	13339.1	0.6019
NF-E2(bZIP)/K562-NFE2-ChIP-Seq(GSE31477)/Homer	GATGACTCAGCA	0.01	-5.586	0.0112	64	0.0286	435.2	0.0196
CArG(MADS)/PUER-Srf-ChIP-Seq(Sullivan et al.)/Homer	CCATATATGGNM	0.01	-5.553	0.0115	294	0.1316	2488.2	0.1123
HNF6(Homeobox)/Liver-Hnf6-ChIP-Seq(ERP000394)/Homer	NTATYGATCH	0.01	-5.525	0.0117	394	0.1764	3424	0.1545
SeqBias: GA-repeat	GAGAGAGAGA	0.01	-5.426	0.0128	2056	0.9203	20020.7	0.9034
AP-2gamma(AP2)/MCF7-TFAP2C-ChIP-Seq(GSE21234)/Homer	SCCTSAGGSCAW	0.01	-5.401	0.013	870	0.3894	8005.1	0.3612
EBF1(EBF)/Near-E2A-ChIP-Seq(GSE21512)/Homer	GTCCCCWGGGGA	0.01	-5.327	0.0139	911	0.4078	8412.4	0.3796
RUNX-AML(Runt)/CD4+-PolII-ChIP-Seq(Barski et al.)/Homer	GCTGTGGTTW	0.01	-5.218	0.0153	639	0.286	5778.4	0.2607
HLH-1(bHLH)/cElegans-Embryo-HLH1-ChIP-Seq(modEncode)/Homer	RACAGCTGTTBH	0.01	-5.086	0.0173	679	0.3039	6174.8	0.2786
E-box/Drosophila-Promoters/Homer	AACAGCTGTTHN	0.01	-5.072	0.0174	251	0.1124	2115.4	0.0955
Bcl6(Zf)/Liver-Bcl6-ChIP-Seq(GSE31578)/Homer	NNNCTTTCCAGGAAA	0.01	-5.042	0.0178	1053	0.4714	9832.4	0.4437
NFAT(RHD)/Jurkat-NFATC1-ChIP-Seq(Jolma et al.)/Homer	ATTTTCCATT	0.01	-5.005	0.0183	671	0.3004	6103.1	0.2754
RFX(HTH)/K562-RFX3-ChIP-Seq(SRA012198)/Homer	CGGTTGCCATGGCAAC	0.01	-5.004	0.0183	91	0.0407	678.1	0.0306
Nrf2(bZIP)/Lymphoblast-Nrf2-ChIP-Seq(GSE37589)/Homer	HTGCTGAGTCAT	0.01	-4.935	0.0193	55	0.0246	375	0.0169
CHR/Cell-Cycle-Exp/Homer	SRGTTTCAAA	0.01	-4.854	0.0207	452	0.2023	4014.5	0.1811
X-box(HTH)/NPC-H3K4me1-ChIP-Seq(GSE16256)/Homer	GGTTGCCATGGCAA	0.01	-4.816	0.0213	119	0.0533	929.4	0.0419
Unknown3/Arabidopsis-Promoters/Homer	AYTAAACCGG	0.01	-4.79	0.0217	138	0.0618	1099.8	0.0496
Atf4(bZIP)/MEF-Atf4-ChIP-Seq(GSE35681)/Homer	MTGATGCAAT	0.01	-4.677	0.0241	197	0.0882	1638.7	0.0739
Chop(bZIP)/MEF-Chop-ChIP-Seq(GSE35681)/Homer	ATTGCATCAT	0.1	-4.582	0.0263	151	0.0676	1224.9	0.0553
Srebp1a(HLH)/HepG2-Srebp1a-ChIP-Seq(GSE31477)/Homer	RTCACSCCAY	0.1	-4.461	0.0294	201	0.09	1685.8	0.0761
RUNX(Runt)/HPC7-Runx1-ChIP-Seq(GSE22178)/Homer	SAAACCACAG	0.1	-4.32	0.0336	633	0.2833	5791	0.2613
TEAD4(TEA)/Tropoblast-Tead4-ChIP-Seq(GSE37350)/Homer	CCWGGAATGY	0.1	-4.154	0.0393	675	0.3021	6212.5	0.2803
GRHL2(CP2)/HBE-GRHL2-ChIP-Seq(GSE46194)/Homer	AAACYKGTTWDACMRGTTTB	0.1	-4.086	0.0417	335	0.15	2958	0.1335
Smad4(MAD)/ESC-SMAD4-ChIP-Seq(GSE29422)/Homer	VBSYGTCTGG	0.1	-3.935	0.0482	1169	0.5233	11084.9	0.5002
MyoD(HLH)/Myotube-MyoD-ChIP-Seq(GSE21614)/Homer	RRCAGCTGYTSY	0.1	-3.863	0.0513	668	0.299	6170.2	0.2784
Mouse_Recombination_Hotspot/Testis-DMC1-ChIP-Seq(GSE24438)/Homer	ACTYKNATTCGTGNTACTTC	0.1	-3.825	0.0529	61	0.0273	453.7	0.0205
IRF4(IRF)/GM12878-IRF4-ChIP-Seq(GSE32465)/Homer	ACTGAAACCA	0.1	-3.795	0.0541	356	0.1594	3176.9	0.1433
JunD(bZIP)/K562-JunD-ChIP-Seq/Homer	ATGACGTCATCN	0.1	-3.745	0.0564	76	0.034	586.8	0.0265
MYB(HTH)/ERMYB-Myb-ChIPSeq(GSE22095)/Homer	GGCVGTTR	0.1	-3.743	0.0564	1140	0.5103	10816.1	0.488
PQM-1(?)/cElegans-L3-ChIP-Seq(modEncode)/Homer	ACTGATAAGA	0.1	-3.733	0.0564	286	0.128	2518.6	0.1136
HRE(HSF)/Striatum-HSF1-ChIP-Seq(GSE38000)/Homer	TTCTAGAABNTTCTA	0.1	-3.693	0.058	221	0.0989	1912	0.0863
NFkB-p50,p52(RHD)/p50-ChIP-Chip(Schreiber et al.)/Homer	GGGGGAATCCCC	0.1	-3.628	0.0615	134	0.06	1111.3	0.0501
NFAT:AP1/Jurkat-NFATC1-ChIP-Seq(Jolma et al.)/Homer	SARTGGAAAAWRTGAGTCAB	0.1	-3.587	0.0635	159	0.0712	1342.3	0.0606
Pho4(bHLH)/Yeast-Pho4-ChIP-Seq(GSE29506)/Homer	AAGCACGTGBGD	0.1	-3.537	0.0663	178	0.0797	1520.4	0.0686
SeqBias: CG bias	SSSSSSSSSS	0.1	-3.51	0.0676	2037	0.9118	19928	0.8992
EGL-5(Homeobox)/cElegans-L3-EGL5-ChIP-Seq(modEncode)/Homer	ATTTAATGGG	0.1	-3.503	0.0676	938	0.4199	8846.4	0.3992
SeqBias: GCW-triplet	GCWGCWGCWGCW	0.1	-3.466	0.0696	2212	0.9902	21833.7	0.9852
HIF2a(HLH)/785_O-HIF2a-ChIP-Seq(GSE34871)/Homer	GCACGTACCC	0.1	-3.457	0.0697	262	0.1173	2310.4	0.1042
FXR(NR/IR1)/Liver-FXR-ChIP-Seq(Chong et al.)/Homer	AGGTCANTGACCTB	0.1	-3.344	0.0775	384	0.1719	3477.6	0.1569
Ap4(HLH)/AML-Tfap4-ChIP-Seq(GSE45738)/Homer	NAHCAGCTGD	0.1	-3.317	0.079	938	0.4199	8866.6	0.4001
Reverb(NR/DR2)/BLRP(RAW)-Reverba-ChIP-Seq(GSE45914)/Homer	GTRGGTCASTGGGTCA	0.1	-3.258	0.0832	159	0.0712	1359.5	0.0613
MafA(bZIP)/Islet-MafA-ChIP-Seq(GSE30298)/Homer	TGCTGACTCA	0.1	-3.138	0.0932	694	0.3107	6494.4	0.293
Maz(Zf)/HepG2-Maz-ChIP-Seq(GSE31477)/Homer	GGGGGGGG	0.1	-3.137	0.0932	1019	0.4561	9685.9	0.437
CEBP:CEBP(bZIP)/MEF-Chop-ChIP-Seq(GSE35681)/Homer	NTNATGCAAYMNNHTGMAAY	0.1	-3.081	0.0973	103	0.0461	853.2	0.0385
Erra(NR)/HepG2-Erra-ChIP-Seq(GSE31477)/Homer	CAAAGGTCAG	0.1	-3.031	0.1016	1413	0.6325	13615.5	0.6144
TOD6?/SacCer-Promoters/Homer	GCGATGAGMT	0.1	-3.012	0.1028	154	0.0689	1326.1	0.0598
SUT1?/SacCer-Promoters/Homer	CCCCGCGC	0.1	-2.977	0.1058	1894	0.8478	18487.5	0.8342
Smad2(MAD)/ES-SMAD2-ChIP-Seq(GSE29422)/Homer	CTGTCTGG	0.1	-2.974	0.1058	1149	0.5143	10991.8	0.496
SeqBias: polyA-repeat	AAAAAAAAAA	0.1	-2.972	0.1058	2217	0.9924	21906.8	0.9885
Rfx1(HTH)/NPC-H3K4me1-ChIP-Seq(GSE16256)/Homer	KGTTGCCATGGCAA	0.1	-2.949	0.1065	193	0.0864	1694.3	0.0765
ZFX(Zf)/mES-Zfx-ChIP-Seq(GSE11431)/Homer	AGGCCTRG	0.1	-2.858	0.1159	994	0.4449	9471.7	0.4274
AP-2alpha(AP2)/Hela-AP2alpha-ChIP-Seq(GSE31477)/Homer	ATGCCCTGAGGC	0.1	-2.845	0.1167	706	0.316	6643.2	0.2998
TATA-Box(TBP)/Promoter/Homer	CCTTTTAWAGSC	0.1	-2.779	0.1238	926	0.4145	8810.3	0.3975
PRDM14(Zf)/H1-PRDM14-ChIP-Seq(GSE22767)/Homer	RGGTCTCTAACY	0.1	-2.72	0.1305	330	0.1477	3012.5	0.1359
AARE(HLH)/mES-cMyc-ChIP-Seq/Homer	GATTGCATCA	0.1	-2.691	0.1335	63	0.0282	507.6	0.0229
REST-NRSF(Zf)/Jurkat-NRSF-ChIP-Seq/Homer	GGMGCTGTCCATGGTGCTGA	0.1	-2.689	0.1335	16	0.0072	101.7	0.0046
Mef2c(MADS)/GM12878-Mef2c-ChIP-Seq(GSE32465)/Homer	DCYAAAAATAGM	0.1	-2.638	0.1389	297	0.1329	2703.5	0.122
Sox3(HMG)/NPC-Sox3-ChIP-Seq(GSE33059)/Homer	CCWTTGTY	0.1	-2.596	0.1439	1126	0.504	10810.1	0.4878
HRE(HSF)/HepG2-HSF1-ChIP-Seq(GSE31477)/Homer	BSTTCTRGAABVTTCYAGAA	0.1	-2.5	0.1575	173	0.0774	1535.8	0.0693
RUNX1(Runt)/Jurkat-RUNX1-ChIP-Seq(GSE29180)/Homer	AAACCACARM	0.1	-2.489	0.1581	820	0.3671	7803.6	0.3521
Znf263(Zf)/K562-Znf263-ChIP-Seq(GSE31477)/Homer	CVGTSCTCCC	0.1	-2.404	0.171	1234	0.5524	11908.2	0.5373
Srebp2(HLH)/HepG2-Srebp2-ChIP-Seq(GSE31477)/Homer	CGGTCACSCCAC	0.1	-2.384	0.1736	132	0.0591	1157.2	0.0522
E-box/Arabidopsis-Promoters/Homer	GCCACGTG	1	-2.285	0.1903	348	0.1558	3225.2	0.1455
Lhx2(Homeobox)/HFSC-Lhx2-ChIP-Seq(GSE48068)/Homer	TAATTAGN	1	-2.259	0.1941	714	0.3196	6792.7	0.3065
c-Jun-CRE(bZIP)/K562-cJun-ChIP-Seq(GSE31477)/Homer	ATGACGTCATCY	1	-2.249	0.1949	232	0.1038	2114.1	0.0954
E2F(E2F)/Cell-Cycle-Exp/Homer	TTSGCGCGAAAA	1	-2.248	0.1949	38	0.017	299.3	0.0135
TRa(NR)/C17.2-TRa-ChIP-Seq(GSE38347)/Homer	GGTCANYTGAGGWCA	1	-2.126	0.2179	389	0.1741	3638	0.1642
PAX5-shortForm(Paired/Homeobox)/GM12878-PAX5-ChIP-Seq(GSE32465)/Homer	GTCACGCTCSCTGM	1	-2.11	0.2201	104	0.0466	911.1	0.0411
ETS:E-box/HPC7-Scl-ChIP-Seq(GSE22178)/Homer	AGGAARCAGCTG	1	-2.065	0.2286	91	0.0407	792.7	0.0358
Unknown1(NR/Ini-like)/Drosophila-Promoters/Homer	MYGGTCACACTG	1	-2.051	0.2307	199	0.0891	1815.7	0.0819
VDR(NR/DR3)/GM10855-VDR+vitD-ChIP-Seq(GSE22484)/Homer	ARAGGTCANWGAGTTCANNN	1	-2.041	0.2316	210	0.094	1921.1	0.0867
Tcfcp2l1(CP2)/mES-Tcfcp2l1-ChIP-Seq(GSE11431)/Homer	NRAACCRGTTYRAACCRGYT	1	-2.015	0.2362	160	0.0716	1446.6	0.0653
GFX(?)/Promoter/Homer	ATTCTCGCGAGA	1	-1.989	0.2409	8	0.0036	48.3	0.0022
Nkx6.1(Homeobox)/Islet-Nkx6.1-ChIP-Seq(GSE40975)/Homer	GKTAATGR	1	-1.928	0.2547	1344	0.6016	13072.5	0.5899
Unknown1/Arabidopsis-Promoters/Homer	RGGGTAWWWTHGTAA	1	-1.918	0.2557	79	0.0354	688.5	0.0311
Egr2/Thymocytes-Egr2-ChIP-Seq(GSE34254)/Homer	NGCGTGGGCGGR	1	-1.898	0.2596	173	0.0774	1579.9	0.0713
SeqBias: A/T bias	WWWWWWWWWW	1	-1.873	0.2646	2165	0.9691	21380.3	0.9647
Tal1	CATCTG	1	-1.852	0.2686	1070	0.479	10362.8	0.4676
Ik-1	NHTTGGGAATRCC	1	-1.818	0.2763	2221	0.9942	21985.2	0.992
Atf1(bZIP)/K562-ATF1-ChIP-Seq(GSE31477)/Homer	GATGACGTCA	1	-1.782	0.285	467	0.209	4438.7	0.2003
Unknown5/Drosophila-Promoters/Homer	GCTGATAASV	1	-1.774	0.2855	471	0.2108	4478.6	0.2021
Tbx20(T-box)/Heart-Tbx20-ChIP-Seq(GSE29636)/Homer	GGTGYTGACAGS	1	-1.772	0.2855	212	0.0949	1964.6	0.0886
SeqBias: G/A bias	RRRRRRRRRR	1	-1.763	0.2856	2213	0.9906	21898.3	0.9881
Lhx3(Homeobox)/Neuron-Lhx3-ChIP-Seq(GSE31456)/Homer	ADBTAATTAR	1	-1.749	0.288	998	0.4467	9666.3	0.4362
SeqBias: C/A-bias	MMMMMMMMMM	1	-1.746	0.288	2209	0.9888	21855.5	0.9862
Pdx1(Homeobox)/Islet-Pdx1-ChIP-Seq(SRA008281)/Homer	YCATYAATCA	1	-1.733	0.2895	641	0.2869	6149.9	0.2775
CRX(Homeobox)/Retina-Crx-ChIP-Seq(GSE20012)/Homer	GCTAATCC	1	-1.718	0.2923	1359	0.6083	13255.2	0.5981
Usf2(HLH)/C2C12-Usf2-ChIP-Seq(GSE36030)/Homer	GTCACGTGGT	1	-1.712	0.2926	267	0.1195	2501.9	0.1129
EFL-1(E2F)/cElegans-L1-EFL1-ChIP-Seq(modEncode)/Homer	TGCAARYGCGCTCYA	1	-1.706	0.2926	17	0.0076	129.1	0.0058
CRE(bZIP)/Promoter/Homer	CSGTGACGTCAC	1	-1.695	0.2944	168	0.0752	1548.9	0.0699
GRE(NR/IR3)/A549-GR-ChIP-Seq(GSE32465)/Homer	NRGVACABNVTGTYCY	1	-1.687	0.2952	117	0.0524	1061.1	0.0479
Olig2(bHLH)/Neuron-Olig2-ChIP-Seq(GSE30882)/Homer	RCCATMTGTT	1	-1.683	0.2952	1272	0.5694	12395.1	0.5593
Esrrb(NR)/mES-Esrrb-ChIP-Seq(GSE11431)/Homer	KTGACCTTGA	1	-1.663	0.2992	584	0.2614	5600.8	0.2527
Gfi1b(Zf)/HPC7-Gfi1b-ChIP-Seq(GSE22178)/Homer	MAATCACTGC	1	-1.648	0.3022	495	0.2216	4730.7	0.2135
ELT-3(Gata)/cElegans-L1-ELT3-ChIP-Seq(modEncode)/Homer	AWTGATAAGA	1	-1.587	0.3195	315	0.141	2981.5	0.1345
GATA:SCL/Ter119-SCL-ChIP-Seq(GSE18720)/Homer	CRGCTGBNGNSNNSAGATAA	1	-1.574	0.322	120	0.0537	1098.4	0.0496
Foxh1(Forkhead)/hESC-FOXH1-ChIP-Seq(GSE29422)/Homer	NNTGTGGATTSS	1	-1.572	0.322	442	0.1979	4222.3	0.1905
Unknown2/Drosophila-Promoters/Homer	CATCMCTA	1	-1.536	0.3309	984	0.4405	9564.4	0.4316
GATA-IR4(Zf)/iTreg-Gata3-ChIP-Seq(GSE20898)/Homer	NAGATWNBNATCTNN	1	-1.527	0.3325	57	0.0255	503.1	0.0227
Sox6(HMG)/Myotubes-Sox6-ChIP-Seq(GSE32627)/Homer	CCATTGTTNY	1	-1.513	0.3355	1027	0.4597	9994.8	0.451
Nkx2.5(Homeobox)/HL1-Nkx2.5.biotin-ChIP-Seq(GSE21529)/Homer	RRSCACTYAA	1	-1.495	0.3399	1372	0.6141	13423.2	0.6057
SeqBias: CG-repeat	CGCGCGCGCG	1	-1.457	0.3511	608	0.2722	5868	0.2648
AR-halfsite(NR)/LNCaP-AR-ChIP-Seq(GSE27824)/Homer	CCAGGAACAG	1	-1.426	0.3605	1775	0.7945	17461.2	0.7879
c-Myc(HLH)/LNCAP-cMyc-ChIP-Seq(unpublished)/Homer	VCCACGTG	1	-1.405	0.3662	344	0.154	3287.7	0.1483
DPL-1(E2F)/cElegans-Adult-ChIP-Seq(modEncode)/Homer	TAGCGCGC	1	-1.398	0.3672	353	0.158	3376.2	0.1523
USF1(HLH)/GM12878-Usf1-ChIP-Seq(GSE32465)/Homer	SGTCACGTGR	1	-1.39	0.368	362	0.162	3465.1	0.1564
GEI-11(Myb?)/cElegans-L4-GEI11-ChIP-Seq(modEncode)/Homer	CCGACAYYTYACGGG	1	-1.36	0.3776	43	0.0192	380.4	0.0172
Nanog(Homeobox)/mES-Nanog-ChIP-Seq(GSE11724)/Homer	RGCCATTAAC	1	-1.356	0.3776	1776	0.795	17482.7	0.7889
RUNX2(Runt)/PCa-RUNX2-ChIP-Seq(GSE33889)/Homer	NWAACCACADNN	1	-1.356	0.3776	704	0.3151	6831.2	0.3082
EBNA1(EBV virus)/Raji-EBNA1-ChIP-Seq(GSE30709)/Homer	GGYAGCAYDTGCTDCCCNNN	1	-1.32	0.3871	19	0.0085	158.3	0.0071
GRE/RAW264.7-GRE-ChIP-Seq(Unpublished)/Homer	VAGRACAKWCTGTYC	1	-1.282	0.4004	200	0.0895	1898.6	0.0857
Pax7-long(Paired/Homeobox)/Myoblast-Pax7-ChIP-Seq(GSE25064)/Homer	TAATCHGATTAC	1	-1.273	0.402	16	0.0072	132.7	0.006
Sox2(HMG)/mES-Sox2-ChIP-Seq(GSE11431)/Homer	BCCATTGTTC	1	-1.244	0.4118	657	0.2941	6388.5	0.2883
SeqBias: polyC-repeat	CCCCCCCCCC	1	-1.175	0.4391	2192	0.9812	21704.6	0.9794
p53(p53)/mES-cMyc-ChIP-Seq(GSE11431)/Homer	ACATGCCCGGGCAT	1	-1.158	0.4448	17	0.0076	145.9	0.0066
FHY3(FAR1)/Arabidopsis-FHY3-ChIP-Seq(GSE30711)/Homer	HHCACGCGCBTN	1	-1.15	0.4461	177	0.0792	1689.9	0.0763
PR(NR)/T47D-PR-ChIP-Seq(GSE31130)/Homer	VAGRACAKNCTGTBC	1	-1.13	0.4533	1369	0.6128	13465.4	0.6076
Tbox:Smad/ESCd5-Smad2_3-ChIP-Seq(GSE29422)/Homer	AGGTGHCAGACA	1	-1.079	0.4747	188	0.0842	1805	0.0814
GFY(?)/Promoter/Homer	ACTACAATTCCC	1	-1.066	0.4784	54	0.0242	502.2	0.0227
Pitx1(Homeobox)/Chicken-Pitx1-ChIP-Seq(GSE38910)/Homer	TAATCCCN	1	-1.061	0.4788	1785	0.799	17623.2	0.7952
CLOCK(HLH)/Liver-Clock-ChIP-Seq(GSE39860)/Homer	GHCACGTG	1	-1.032	0.4909	431	0.1929	4200.9	0.1896
ABF1/SacCer-Promoters/Homer	CGTRNAAARTGA	1	-1.001	0.5037	134	0.06	1286.5	0.0581
HIF-1a(HLH)/MCF7-HIF1a-ChIP-Seq(GSE28352)/Homer	TACGTGCV	1	-0.996	0.5041	186	0.0833	1796.9	0.0811
LXRE(NR/DR4)/BLRP(RAW)-LXRb-ChIP-Seq(GSE21512)/Homer	RGGTTACTANAGGTCA	1	-0.9332	0.5344	45	0.0201	425	0.0192
NFY(CCAAT)/Promoter/Homer	RGCCAATSRG	1	-0.9286	0.5344	632	0.2829	6206.7	0.2801
Pbx3(Homeobox)/GM12878-PBX3-ChIP-Seq(GSE32465)/Homer	SCTGTCAMTCAN	1	-0.917	0.5383	234	0.1047	2279	0.1028
ZNF143|STAF(Zf)/CUTLL-ZNF143-ChIP-Seq(GSE29600)/Homer	ATTTCCCAGVAKSCY	1	-0.9056	0.5421	385	0.1723	3770.9	0.1701
Tcf4(HMG)/Hct116-Tcf4-ChIP-Seq(SRA012054)/Homer	ASATCAAAGGVA	1	-0.8979	0.5438	373	0.167	3653.1	0.1648
p63(p53)/Keratinocyte-p63-ChIP-Seq(GSE17611)/Homer	NNDRCATGYCYNRRCATGYH	1	-0.859	0.5629	320	0.1432	3137.8	0.1416
GATA-IR3(Zf)/iTreg-Gata3-ChIP-Seq(GSE20898)/Homer	NNNNNBAGATAWYATCTVHN	1	-0.7894	0.6009	102	0.0457	996.4	0.045
ZBTB33(Zf)/GM12878-ZBTB33-ChIP-Seq(GSE32465)/Homer	GGVTCTCGCGAGAAC	1	-0.7886	0.6009	21	0.0094	199.3	0.009
PHA-4(Forkhead)/cElegans-Embryos-PHA4-ChIP-Seq(modEncode)/Homer	KTGTTTGC	1	-0.7611	0.6128	1588	0.7108	15729.3	0.7097
ZNF711(Zf)/SH-SY5Y-ZNF711-ChIP-Seq(GSE20673)/Homer	AGGCCTAG	1	-0.7333	0.6273	1159	0.5188	11480.7	0.518
E-box(HLH)/Promoter/Homer	SSGGTCACGTGA	1	-0.7195	0.6333	56	0.0251	549.4	0.0248
PBX1(Homeobox)/MCF7-PBX1-ChIP-Seq(GSE28007)/Homer	GSCTGTCACTCA	1	-0.6834	0.6538	89	0.0398	880.8	0.0397
Arnt:Ahr(bHLH)/MCF7-Arnt-ChIP-Seq(Lo et al.)/Homer	TBGCACGCAA	1	-0.6637	0.664	463	0.2073	4596.1	0.2074
Oct4:Sox17/F9-Sox17-ChIP-Seq(GSE44553)/Homer	CCATTGTATGCAAAT	1	-0.6288	0.6846	85	0.038	847.8	0.0383
TCFL2(HMG)/K562-TCF7L2-ChIP-Seq(GSE29196)/Homer	ACWTCAAAGG	1	-0.6248	0.6846	69	0.0309	688.8	0.0311
SeqBias: CA-repeat	CACACACACA	1	-0.6005	0.6983	1932	0.8648	19180.1	0.8654
Six1(Homeobox)/Myoblast-Six1-ChIP-Chip(GSE20150)/Homer	GKVTCADRTTWC	1	-0.587	0.7049	190	0.085	1900.8	0.0858
DREF/Drosophila-Promoters/Homer	AVYTATCGATAD	1	-0.5629	0.7191	6	0.0027	60.6	0.0027
Nkx2.1(Homeobox)/LungAC-Nkx2.1-ChIP-Seq(GSE43252)/Homer	RSCACTYRAG	1	-0.5453	0.7288	1550	0.6938	15417	0.6956
GAGA-repeat/SacCer-Promoters/Homer	CTYTCTYTCTCTCTC	1	-0.5438	0.7288	1806	0.8084	17949.5	0.8099
NPAS2(HLH)/Liver-NPAS2-ChIP-Seq(GSE39860)/Homer	KCCACGTGAC	1	-0.542	0.7288	812	0.3635	8099.6	0.3655
Phox2a(Homeobox)/Neuron-Phox2a-ChIP-Seq(GSE31456)/Homer	YTAATYNRATTA	1	-0.5345	0.7288	228	0.1021	2290.9	0.1034
MafF(bZIP)/HepG2-MafF-ChIP-Seq(GSE31477)/Homer	HWWGTCAGCAWWTTT	1	-0.5279	0.7295	176	0.0788	1772.5	0.08
Oct2(POU/Homeobox)/Bcell-Oct2-ChIP-Seq(GSE21512)/Homer	ATATGCAAAT	1	-0.5083	0.7409	173	0.0774	1746.8	0.0788
LIN-15B(Zf)/cElegans-L3-LIN15B-ChIP-Seq(modEncode)/Homer	CARTGGAGCGCRYTTGCATT	1	-0.453	0.7798	2	0.0009	21.3	0.001
Tcf3(HMG)/mES-Tcf3-ChIP-Seq(GSE11724)/Homer	ASWTCAAAGG	1	-0.4381	0.7884	215	0.0962	2183.4	0.0985
CES-1(Homeobox)/cElegans-L1-CES1-ChIP-Seq(modEncode)/Homer	AAATTSAATTTN	1	-0.4079	0.8093	321	0.1437	3254.9	0.1469
bHLHE40(HLH)/HepG2-BHLHE40-ChIP-Seq(GSE31477)/Homer	KCACGTGMCN	1	-0.3529	0.8516	235	0.1052	2408.5	0.1087
PRDM9(Zf)/Testis-DMC1-ChIP-Seq(GSE35498)/Homer	ADGGYAGYAGCATCT	1	-0.3447	0.8552	336	0.1504	3426.6	0.1546
HOXA2(Homeobox)/mES-Hoxa2-ChIP-Seq(Donaldson et al.)/Homer	GYCATCMATCAT	1	-0.3417	0.8552	75	0.0336	790.4	0.0357
Unknown2/Arabidopsis-Promoters/Homer	AAACGACGTCGTTTT	1	-0.326	0.8645	2	0.0009	25.8	0.0012
Oct4(POU/Homeobox)/mES-Oct4-ChIP-Seq(GSE11431)/Homer	ATTTGCATAW	1	-0.321	0.8654	299	0.1338	3063.3	0.1382
Pax8(Paired/Homeobox)/Thyroid-Pax8-ChIP-Seq(GSE26938)/Homer	GTCATGCHTGRCTGS	1	-0.313	0.8689	316	0.1415	3237.8	0.1461
PRDM1/BMI1(Zf)/Hela-PRDM1-ChIP-Seq(GSE31477)/Homer	ACTTTCACTTTC	1	-0.2913	0.8845	457	0.2046	4662.1	0.2104
Smad3(MAD)/NPC-Smad3-ChIP-Seq(GSE36673)/Homer	TWGTCTGV	1	-0.2854	0.8863	1557	0.697	15593.3	0.7036
MafK(bZIP)/C2C12-MafK-ChIP-Seq(GSE36030)/Homer	GCTGASTCAGCA	1	-0.2821	0.8863	210	0.094	2179.7	0.0984
Cbf1(bHLH)/Yeast-Cbf1-ChIP-Seq(GSE29506)/Homer	TCACGTGAYH	1	-0.2804	0.8863	191	0.0855	1987.7	0.0897
GFY-Staf/Promoters/Homer	RACTACAATTCCCAGAAKGC	1	-0.2451	0.912	39	0.0175	435.3	0.0196
GLI3(Zf)/GLI3-ChIP-Chip(GSE11077)/Homer	CGTGGGTGGTCC	1	-0.2395	0.9137	130	0.0582	1379.5	0.0622
Rfx5(HTH)/GM12878-Rfx5-ChIP-Seq(GSE31477)/Homer	SCCTAGCAACAG	1	-0.2258	0.9227	289	0.1294	3002.8	0.1355
p53(p53)/Saos-p53-ChIP-Seq/Homer	RRCATGYCYRGRCATGYYYN	1	-0.2253	0.9227	80	0.0358	868.8	0.0392
p53(p53)/Saos-p53-ChIP-Seq(GSE15780)/Homer	RRCATGYCYRGRCATGYYYN	1	-0.2253	0.9227	80	0.0358	868.8	0.0392
RBPJ:Ebox/Panc1-Rbpj1-ChIP-Seq(GSE47459)/Homer	GGGRAARRGRMCAGMTG	1	-0.188	0.9474	307	0.1374	3204.1	0.1446
TATA-box/Drosophila-Promoters/Homer	CTATAAAAGCSV	1	-0.187	0.9474	57	0.0255	638.2	0.0288
PIF5ox(bHLH)/Arabidopsis-PIF5ox-ChIP-Seq(GSE35062)/Homer	BCACGTGVDN	1	-0.1811	0.9474	744	0.333	7602.3	0.343
Egr1(Zf)/K562-Egr1-ChIP-Seq(GSE32465)/Homer	TGCGTGGGYG	1	-0.1791	0.9474	566	0.2534	5821.3	0.2627
Nkx3.1(Homeobox)/LNCaP-Nkx3.1-ChIP-Seq(GSE28264)/Homer	AAGCACTTAA	1	-0.1706	0.9498	1360	0.6088	13727.7	0.6194
Pax7-longest(Paired/Homeobox)/Myoblast-Pax7-ChIP-Seq(GSE25064)/Homer	NTAATTDGCYAATTANNWWD	1	-0.1528	0.9632	14	0.0063	180.4	0.0081
Hoxb4(Homeobox)/ES-Hoxb4-ChIP-Seq(GSE34014)/Homer	TGATTRATGGCY	1	-0.1517	0.9632	133	0.0595	1444.2	0.0652
PAX5(Paired/Homeobox)/GM12878-PAX5-ChIP-Seq(GSE32465)/Homer	GCAGCCAAGCRTGACH	1	-0.1227	0.9853	315	0.141	3329.9	0.1503
bZIP:IRF/Th17-BatF-ChIP-Seq(GSE39756)/Homer	NAGTTTCABTHTGACTNW	1	-0.105	0.9993	334	0.1495	3538.9	0.1597
c-Myc/mES-cMyc-ChIP-Seq(GSE11431)/Homer	VVCCACGTGG	1	-0.1018	0.9993	417	0.1867	4385.8	0.1979
NRF1(NRF)/MCF7-NRF1-ChIP-Seq(Unpublished)/Homer	CTGCGCATGCGC	1	-0.09873	0.9993	65	0.0291	755.6	0.0341
PCF/Arabidopsis-Promoters/Homer	NNWWWTGGGCYTDDN	1	-0.09774	0.9993	171	0.0765	1870.1	0.0844
SFP1/SacCer-Promoters/Homer	DDAAAAATTTTY	1	-0.09174	0.9993	41	0.0184	498.7	0.0225
Unknown4/Drosophila-Promoters/Homer	AAAAATACCRMA	1	-0.09074	0.9993	61	0.0273	716.3	0.0323
n-Myc(HLH)/mES-nMyc-ChIP-Seq(GSE11431)/Homer	VRCCACGTGG	1	-0.08604	0.9993	539	0.2413	5638.5	0.2544
Pax7(Paired/Homeobox)/Myoblast-Pax7-ChIP-Seq(GSE25064)/Homer	TAATCAATTA	1	-0.06919	1	55	0.0246	663.8	0.03
GAGA-repeat/Arabidopsis-Promoters/Homer	CTCTCTCTCY	1	-0.06801	1	1012	0.453	10404.2	0.4695
PAX3:FKHR-fusion(Paired/Homeobox)/Rh4-PAX3:FKHR-ChIP-Seq(GSE19063)/Homer	ACCRTGACTAATTNN	1	-0.05853	1	137	0.0613	1549.9	0.0699
Unknown6/Drosophila-Promoters/Homer	AATTTTAAAA	1	-0.05476	1	479	0.2144	5078.3	0.2291
Max(HLH)/K562-Max-ChIP-Seq(GSE31477)/Homer	RCCACGTGGYYN	1	-0.0534	1	523	0.2341	5527.5	0.2494
LIN-39(Homeobox)/cElegans.L3-LIN39-ChIP-Seq(modEncode)/Homer	ATGATTRATG	1	-0.05222	1	668	0.299	6994.9	0.3156
Pho2(bHLH)/Yeast-Pho2-ChIP-Seq(GSE29506)/Homer	CCCACGTGCT	1	-0.03234	1	317	0.1419	3467.1	0.1564
ERE(NR/IR3)/MCF7-ERa-ChIP-Seq(Unpublished)/Homer	VAGGTCACNSTGACC	1	-0.0284	1	246	0.1101	2740.1	0.1236
ARE(NR)/LNCAP-AR-ChIP-Seq(GSE27824)/Homer	RGRACASNSTGTYCYB	1	-0.02686	1	218	0.0976	2451.7	0.1106
SEP3(MADS)/Arabidoposis-Flower-Sep3-ChIP-Seq/Homer	CCAAAAAGGG	1	-0.02476	1	770	0.3447	8098.4	0.3654
BMAL1(HLH)/Liver-Bmal1-ChIP-Seq(GSE39860)/Homer	GNCACGTG	1	-0.02033	1	1104	0.4942	11451.8	0.5167
Nr5a2(NR)/mES-Nr5a2-ChIP-Seq(GSE19019)/Homer	BTCAAGGTCA	1	-0.01506	1	489	0.2189	5297.9	0.2391
GATA-DR4(Zf)/iTreg-Gata3-ChIP-Seq(GSE20898)/Homer	AGATGKDGAGATAAG	1	-0.01349	1	46	0.0206	623.4	0.0281
Unknown4/Arabidopsis-Promoters/Homer	CKTCKTCTTY	1	-0.01247	1	703	0.3147	7488.7	0.3379
NRF1/Promoter/Homer	STGCGCATGCGC	1	-0.01189	1	98	0.0439	1212.8	0.0547
Nr5a2(NR)/Pancreas-LRH1-ChIP-Seq(GSE34295)/Homer	BTCAAGGTCA	1	-0.00713	1	610	0.2731	6593.7	0.2975
GATA-DR8(Zf)/iTreg-Gata3-ChIP-Seq(GSE20898)/Homer	AGATSTNDNNDSAGATAASN	1	-0.006323	1	55	0.0246	752.2	0.0339
OCT4-SOX2-TCF-NANOG((POU/Homeobox/HMG)/mES-Oct4-ChIP-Seq(GSE11431)/Homer	ATTTGCATAACAATG	1	-0.005643	1	102	0.0457	1288.7	0.0581
FOXA1:AR/LNCAP-AR-ChIP-Seq(GSE27824)/Homer	AGTAAACAAAAAAGAACAND	1	-0.004619	1	42	0.0188	610	0.0275
SeqBias: TA-repeat	TATATATATA	1	-0.000664	1	1253	0.5609	13203.1	0.5958
TATA-box/SacCer-Promoters/Homer	BBHWTATATA	1	-0.00064	1	315	0.141	3697.8	0.1669
YY1(Zf)/Promoter/Homer	CAAGATGGCGGC	1	-7.1e-05	1	37	0.0166	651.3	0.0294
RLR1?/SacCer-Promoters/Homer	WTTTTCYYTTTT	1	0	1	407	0.1822	5256.9	0.2372
RARg(NR)/ES-RARg-ChIP-Seq(GSE30538)/Homer	AGGTCAAGGTCA	1	0	1	41	0.0184	971.2	0.0438
