# Supplementary material for: Microbiota modulate transcription in the intestinal epithelium without remodeling the accessible chromatin landscape
Source: HighWire-hosted journal article supplement (doi:10.1101/gr.165845.113), 2014-06-24
Supplement: Supplemental_TableS14.xlsx [file Supplemental_TableS14.xlsx]

## Sheet: ileum
TABLE S14: Overlap of DHS near microbiota regulated genes with TF ChIP datasets
	DHS near down-regulated genes		DHS near Up-regulated genes
TF	Overlap (z-score)	Overlap (fold)	Overlap (z-score)	Overlap (fold)	z.ratio (down/up)	fold.ratio (down/up)	z.ratio (up/down)	fold.ratio (up/down)
Irf4	12.3274	2.99109	24.3369	7.26006	0.506533	0.411992	1.9742	2.42723
TAL1	4.84598	2.54488	7.616	4.84022	0.63629	0.525777	1.57161	1.90195
RUNX	6.98886	2.80338	10.2395	5.179	0.682537	0.541297	1.46512	1.84741
Stat5a	35.2531	4.47528	46.4354	8.24896	0.759185	0.542526	1.3172	1.84323
BRF1	4.68007	4.92523	5.87414	8.78526	0.796725	0.560624	1.25514	1.78373
FLI1	18.9163	3.375	24.8399	5.95369	0.761529	0.566874	1.31315	1.76406
Stat5b	46.398	5.92248	53.8086	10.0654	0.862278	0.588399	1.15972	1.69953
RUNX1	16.7177	3.82852	20.0284	6.37137	0.834703	0.600894	1.19803	1.66419
BATF	35.143	3.44206	41.6325	5.59652	0.844125	0.615035	1.18466	1.62592
GTF3C	6.419	3.79479	7.47939	6.13537	0.858225	0.61851	1.1652	1.61679
Stat3	26.3861	5.93159	28.704	9.47975	0.91925	0.625712	1.08784	1.59818
IRF4	50.737	5.21326	52.5959	7.9536	0.964657	0.655459	1.03664	1.52565
BCL11A	37.1853	4.16087	39.5352	6.3439	0.940562	0.655885	1.06319	1.52466
Jund	24.182	3.20292	26.5171	4.83969	0.911941	0.661802	1.09656	1.51103
Pou2f2	14.9139	6.47345	15.0816	9.72811	0.988884	0.665437	1.01124	1.50277
Ebf1	37.9186	4.92569	38.8923	7.3946	0.974963	0.66612	1.02568	1.50123
Rela	61.4332	5.41835	62.2681	8.09421	0.986591	0.66941	1.01359	1.49385
Zfp281	12.7663	6.12181	12.5796	9.07568	1.01484	0.67453	0.985377	1.48251
Tbx3	2.69575	1.97833	3.3883	2.93241	0.795604	0.674641	1.25691	1.48227
Jun	21.9738	2.98539	23.7057	4.40479	0.926942	0.677761	1.07882	1.47545
LYL1	6.19393	2.13843	7.39516	3.15241	0.837566	0.678349	1.19394	1.47417
POU2F2	72.8925	6.26016	70.4672	9.10202	1.03442	0.687777	0.966727	1.45396
GFI1B	48.2442	7.30176	44.5786	10.2308	1.08223	0.7137	0.924019	1.40115
STAT2	35.8954	6.41498	33.0428	8.92189	1.08633	0.719017	0.92053	1.39079
MEIS1	28.5577	4.89381	26.8137	6.79553	1.06504	0.720151	0.938932	1.3886
GATA2	15.1037	2.91128	14.8886	3.98428	1.01445	0.730692	0.985757	1.36857
Lxr	13.1717	7.45851	11.8598	10.1681	1.11063	0.733523	0.900393	1.36328
TCF12	76.9537	7.06534	68.5336	9.58463	1.12286	0.737154	0.890582	1.35657
Tcf3	69.8564	5.31578	62.9789	7.17653	1.1092	0.740718	0.901549	1.35004
SPI1	55.407	5.63908	49.4688	7.57597	1.12004	0.744338	0.892826	1.34348
PAX5	72.8553	6.177	63.8677	8.2202	1.14072	0.751442	0.876638	1.33078
Tbp	63.7542	4.94159	55.8848	6.52785	1.14082	0.757001	0.876566	1.321
ERG	76.1844	6.08524	66.0109	8.00886	1.15412	0.759814	0.866463	1.31611
EBF1	72.5633	5.63187	62.6975	7.37796	1.15735	0.763337	0.86404	1.31004
LMO2	16.0978	3.01095	14.7918	3.92924	1.08829	0.766294	0.918871	1.30498
Myc	63.3753	5.29362	54.0948	6.86159	1.17156	0.771485	0.853563	1.2962
PBX3	49.2405	5.9834	41.8734	7.70327	1.17594	0.776735	0.850385	1.28744
SP1	71.4402	6.88919	59.9309	8.86627	1.19204	0.777011	0.838896	1.28698
CREBBP	60.0136	6.23934	50.5361	8.02857	1.18754	0.777142	0.842077	1.28677
ETS1	62.1674	6.90233	52.16	8.87214	1.19186	0.777977	0.839026	1.28538
Bcl6	7.93716	1.84276	8.16342	2.36546	0.972285	0.779028	1.02851	1.28365
STAT1	57.748	4.93469	49.1308	6.32848	1.17539	0.779759	0.850778	1.28245
SPI1	53.1023	3.8435	46.1167	4.91657	1.15148	0.781744	0.868451	1.27919
NFKB	82.1384	4.54073	68.8495	5.73703	1.19301	0.791477	0.838213	1.26346
Usf2	42.4521	5.31285	35.4405	6.70818	1.19784	0.791995	0.834833	1.26263
Spi1	76.1075	3.26975	65.6963	4.11741	1.15847	0.794128	0.863205	1.25924
TAL1	35.9627	6.18916	29.5493	7.75727	1.21704	0.797852	0.821665	1.25336
Eomes	5.2827	2.46448	4.75978	3.08858	1.10986	0.797933	0.901013	1.25324
VDR	42.9963	6.21684	34.4703	7.65319	1.24734	0.81232	0.801704	1.23104
Max	72.1345	5.28205	57.4027	6.43566	1.25664	0.820747	0.795772	1.2184
Foxo1	23.4577	8.7527	18.3791	10.5486	1.27633	0.829747	0.783497	1.20519
Ctcf	103.549	6.48632	77.4725	7.49036	1.33659	0.865956	0.74817	1.15479
Gata1	59.4513	3.784	45.1257	4.36779	1.31746	0.866344	0.759035	1.15428
ZBTB33	28.5385	8.22555	20.8615	9.3746	1.368	0.877429	0.730995	1.13969
Zfp42	16.2824	5.15467	11.8752	5.84823	1.37113	0.881407	0.729327	1.13455
POU5F1	30.9992	4.58032	22.9814	5.18377	1.34888	0.883589	0.741355	1.13175
CTCF	79.1563	4.48152	58.2435	5.06658	1.35906	0.884526	0.735804	1.13055
Cebpb	65.8929	3.63125	48.7602	4.09096	1.35137	0.887628	0.739992	1.1266
E2F6	84.6403	8.20495	59.7236	9.10954	1.4172	0.900699	0.705617	1.11025
CTCF	98.3862	5.94353	70.0658	6.58983	1.4042	0.901925	0.71215	1.10874
NFYA	42.8294	7.65452	30.187	8.43298	1.4188	0.907689	0.704819	1.1017
SRF	24.7444	8.83306	17.0552	9.53442	1.45084	0.92644	0.689254	1.0794
GATA1	21.7066	5.48485	15.0225	5.91561	1.44493	0.927182	0.692073	1.07854
ZNF263	70.2235	6.94804	47.6037	7.42956	1.47517	0.935189	0.677888	1.0693
TP63	26.5171	3.02459	18.047	3.19366	1.46934	0.947059	0.680579	1.0559
EOMES	35.7892	2.861	24.2728	3.00614	1.47446	0.951721	0.678215	1.05073
NFYB	48.4239	7.65349	32.134	7.99642	1.50694	0.957114	0.663597	1.04481
GATA2	33.1724	5.49146	22.0378	5.73461	1.50525	0.9576	0.664342	1.04428
E2F4	86.671	9.56353	57.0806	9.98657	1.5184	0.95764	0.658589	1.04423
TP73	7.58008	5.18533	5.01501	5.40581	1.51148	0.959213	0.661604	1.04252
HOXA13	18.921	6.74782	12.4464	7.01099	1.5202	0.962463	0.657809	1.039
MYC	84.1381	6.8925	54.9108	7.13599	1.53227	0.965878	0.652628	1.03533
Jarid2	17.5098	4.72838	11.2755	4.88712	1.55291	0.967518	0.643952	1.03357
NANOG	59.6435	4.39669	39.0532	4.50859	1.52724	0.97518	0.654777	1.02545
ATF3	22.1737	8.80221	14.371	8.99898	1.54295	0.978134	0.648109	1.02235
MAX	82.5374	6.529	53.0799	6.6666	1.55497	0.97936	0.643101	1.02108
GABPA	59.529	8.98594	38.3146	9.156	1.55369	0.981426	0.643629	1.01893
Klf4	74.6077	9.44362	47.8546	9.56831	1.55905	0.986969	0.641417	1.0132
SOX2	15.0201	6.34918	9.5861	6.43278	1.56686	0.987005	0.638219	1.01317
ERG	94.4327	7.33818	60.2095	7.42284	1.5684	0.988595	0.637592	1.01154
Scly	4.06378	5.1065	2.57535	5.12028	1.57795	0.99731	0.633734	1.0027
Srf	6.65705	3.15814	4.18665	3.13914	1.59007	1.00605	0.628904	0.993984
Esrrb	57.3863	6.53783	35.9901	6.46798	1.5945	1.0108	0.627155	0.989317
USF1	72.8413	7.10685	45.273	7.0188	1.60893	1.01254	0.62153	0.987612
TCF7L2	93.3824	7.64848	57.7215	7.5429	1.61781	1.014	0.61812	0.986196
TFAP2C	81.1648	5.34217	50.0745	5.26084	1.62088	1.01546	0.616949	0.984776
Nfic	32.4563	3.14392	20.1495	3.087	1.61077	1.01844	0.620819	0.981897
REST	74.5221	6.26633	45.9089	6.14704	1.62326	1.01941	0.616044	0.980964
TFAP2A	63.5989	7.92706	38.9671	7.76492	1.63212	1.02088	0.612701	0.979546
JUN	51.2226	3.67625	31.2694	3.5945	1.63811	1.02274	0.610461	0.977762
E2F1	86.7815	7.47294	52.7187	7.27091	1.64612	1.02779	0.607488	0.972965
E2f1	80.6055	9.41171	49.3221	9.1292	1.63427	1.03095	0.611896	0.969983
Creb	6.96734	3.01386	4.20309	2.91569	1.65767	1.03367	0.603256	0.967428
NR3C1	53.7987	5.50353	32.3744	5.31595	1.66177	1.03529	0.601769	0.965916
Mycn	65.5705	11.7322	39.9511	11.2776	1.64127	1.04031	0.609285	0.96125
NRF1	39.7579	6.69061	23.9279	6.41751	1.66157	1.04255	0.60184	0.959182
HEY1	92.8407	7.51423	55.1424	7.20556	1.68365	1.04284	0.593946	0.958923
Nr3c1	13.585	3.61801	8.08067	3.46731	1.68118	1.04346	0.594821	0.958347
USF2	24.3178	10.2218	14.5783	9.75829	1.66808	1.0475	0.599492	0.954655
SIX5	30.385	8.22743	18.1254	7.82484	1.67638	1.05145	0.596525	0.951068
FOS	46.5241	4.72313	27.5034	4.49144	1.69158	1.05158	0.591164	0.950947
TRIM24	12.4679	2.52559	7.07835	2.37829	1.76142	1.06193	0.567725	0.941678
ESR2	23.1044	5.43162	13.5234	5.11249	1.70847	1.06242	0.585319	0.941247
Ascl1	29.7095	9.17242	17.1796	8.57739	1.72935	1.06937	0.578253	0.935128
HNF4A	56.3574	2.14169	31.1053	2.00104	1.81183	1.07029	0.551929	0.934329
JUND	75.1142	4.95766	43.3494	4.62915	1.73276	1.07096	0.577113	0.933738
Pparg	28.6573	6.3848	16.6734	5.95858	1.71874	1.07153	0.58182	0.933245
Npas4	13.9702	2.51918	7.77084	2.33196	1.79778	1.08028	0.556243	0.925685
Nanog	30.3683	3.44181	17.0978	3.18295	1.77615	1.08133	0.563016	0.924789
Smad1	16.9853	3.36443	9.5788	3.09391	1.77321	1.08744	0.563948	0.919593
FOXP2	49.4698	10.6689	28.3171	9.71401	1.747	1.0983	0.572411	0.910495
CDX2_c	72.7414	2.96165	39.2576	2.68581	1.85292	1.1027	0.539688	0.906861
YY1	56.2391	7.5522	31.4847	6.81696	1.78624	1.10785	0.559837	0.902646
NR2C2	35.9362	5.88119	19.9004	5.27873	1.80581	1.11413	0.553769	0.897562
Tcfcp2l1	63.9126	6.48396	35.6397	5.81019	1.7933	1.11596	0.557632	0.896087
HSF1	38.5387	9.526	21.4381	8.51743	1.79767	1.11841	0.556274	0.894125
PPARGC1A	26.5411	9.21717	14.6863	8.20931	1.80721	1.12277	0.55334	0.890654
E2f4	90.3286	10.4758	49.7707	9.30269	1.81489	1.1261	0.550996	0.888018
Cebpa	95.2975	5.26915	51.6469	4.67758	1.84517	1.12647	0.541954	0.887731
GATA6	25.2182	1.73136	11.6473	1.53542	2.16515	1.12761	0.461862	0.886828
Nr0b1	32.2415	7.89884	17.3825	6.96006	1.85483	1.13488	0.539134	0.88115
Hoxc9	10.4217	3.52094	5.42809	3.07266	1.91995	1.14589	0.520847	0.872681
NFY	28.4642	9.67404	15.3789	8.43802	1.85086	1.14648	0.540289	0.872233
NFE2	16.2917	4.56523	8.5734	3.9659	1.90026	1.15112	0.526242	0.868718
Crebbp	24.9889	2.59101	12.364	2.24135	2.0211	1.15601	0.494779	0.865048
CEBPB	73.6033	6.81209	38.9646	5.88406	1.88898	1.15772	0.529387	0.863768
ESR1	43.472	3.76501	22.2585	3.24953	1.95305	1.15863	0.512019	0.863088
Cdx2_b	7.40544	1.36237	2.23544	1.17296	3.31274	1.16148	0.301865	0.860969
Pou5f1	38.4276	4.12421	19.6141	3.52213	1.95918	1.17094	0.510417	0.854013
ZZZ3	7.48087	2.61295	3.54775	2.20618	2.10863	1.18438	0.474242	0.844326
Foxa1	51.0395	7.99602	26.3399	6.72274	1.93772	1.1894	0.516069	0.840762
Zfx	66.4133	10.1778	34.7561	8.55538	1.91084	1.18964	0.52333	0.840593
Carf	7.69317	8.45667	3.94302	7.0393	1.95108	1.20135	0.512536	0.832396
AR	42.7977	3.79593	20.678	3.1409	2.06972	1.20855	0.483157	0.82744
FOSL2	80.4294	6.8912	39.4519	5.60359	2.03867	1.22978	0.490516	0.813152
Sox2	34.3326	4.22573	16.1968	3.40625	2.11972	1.24058	0.471761	0.806074
FOXA1	28.3843	3.25456	12.495	2.56996	2.27165	1.26639	0.440209	0.789649
Crx	48.0301	6.48798	22.2363	5.02977	2.15999	1.28992	0.462965	0.775244
CEBPA	50.2858	6.19952	23.1708	4.78618	2.17022	1.29529	0.460783	0.772025
Nr5a2	14.8787	4.07635	6.50169	3.13195	2.28843	1.30154	0.43698	0.768323
Tcf7l1	17.4968	3.7467	7.45955	2.84865	2.34555	1.31526	0.426339	0.760308
HNF4a	81.0529	7.36373	36.8605	5.59253	2.19891	1.31671	0.454771	0.75947
Nacc1	19.7175	6.96412	8.61191	5.17196	2.28956	1.34651	0.436766	0.742658
RXRA	63.9387	7.75805	28.1783	5.73314	2.26908	1.35319	0.440708	0.738992
Hnf4a	192.788	17.3458	87.6745	12.8081	2.19891	1.35428	0.454772	0.738398
Foxa2	97.4774	7.66732	42.5987	5.63661	2.28827	1.36027	0.437011	0.735147
SREBF2	34.9183	10.0627	15.1973	7.21547	2.29766	1.39459	0.435225	0.717054
EGR1	47.8741	13.2399	20.9321	9.42291	2.28712	1.40508	0.437231	0.711703
Fxr	81.2405	12.8955	35.036	9.13362	2.31877	1.41187	0.431263	0.70828
Cdx2_a	120.449	13.6084	51.8542	9.63416	2.32284	1.41252	0.430508	0.707956
FOXC2	6.45398	2.52765	1.90734	1.72132	3.38375	1.46843	0.29553	0.680998
ESRRA	44.5253	10.4194	17.9255	7.0187	2.48391	1.48453	0.402592	0.673615
CLOCK	18.011	4.59096	6.30771	2.98423	2.85539	1.53841	0.350214	0.650024
Klf1	21.3064	10.8009	7.29073	6.2651	2.9224	1.72398	0.342184	0.580054
SREBF1	55.7101	10.04	18.3874	5.72854	3.02979	1.75263	0.330056	0.57057
BHLHE40	34.9316	12.6081	11.244	6.90284	3.1067	1.82651	0.321885	0.547491
*Mouse TFs are designated by capital first letter
**Human TFs are designated by all capital letters

## Sheet: colon
TABLE S14: Overlap of DHS near microbiota regulated genes with TF ChIP datasets
	DHS near down-regulated genes		DHS near Up-regulated genes
TF	Overlap (z-score)	Overlap (fold)	Overlap (z-score)	Overlap (fold)	z.ratio (down/up)	fold.ratio (down/up)	z.ratio (up/down)	fold.ratio (up/down)
Nr3c1	12.1001	5.20204	3.71141	2.38868	3.26023	2.17779	0.306727	0.459182
Fxr	100.675	33.0365	47.5958	17.2842	2.1152	1.91137	0.472768	0.523186
Cdx2	69.2887	13.9266	35.8779	8.23983	1.93123	1.69015	0.517804	0.591663
Jarid2	20.1085	8.28165	10.2544	5.08066	1.96097	1.63003	0.509951	0.613484
Smad1	13.2024	4.39693	6.60037	2.81288	2.00025	1.56314	0.499938	0.639738
Hnf4a	100.867	16.3456	58.5887	10.6181	1.72161	1.53941	0.580853	0.649599
Cdx2	9.28028	1.82113	2.1495	1.2047	4.31741	1.51169	0.231621	0.661512
CEBPA	31.5218	6.92138	19.7771	4.99112	1.59386	1.38674	0.627409	0.721115
GATA6	16.1469	1.84696	6.83835	1.38634	2.36123	1.33225	0.423508	0.750607
EGR1	35.0052	17.425	24.1836	13.1456	1.44748	1.32553	0.690857	0.754414
HSF1	27.3903	11.8953	18.7432	9.03913	1.46134	1.31598	0.684301	0.759889
ATF3	11.7954	8.50144	8.1324	6.56641	1.45042	1.29469	0.689455	0.772388
ZZZ3	2.58896	2.01897	1.44063	1.608	1.7971	1.25558	0.556452	0.796446
HNF4a	43.4293	7.13394	31.9944	5.87146	1.3574	1.21502	0.7367	0.823032
Pou5f1	23.3269	4.43468	16.7915	3.65901	1.38921	1.21199	0.719836	0.82509
Foxa2	51.3099	7.26108	37.9563	6.0079	1.35181	1.20859	0.739746	0.827412
Pparg	14.4411	5.90626	10.8451	4.96511	1.33158	1.18955	0.75099	0.840652
Foxa1	30.4639	8.51819	23.2962	7.19634	1.30768	1.18368	0.764716	0.844821
Hoxc9	6.10913	3.68926	4.51649	3.13449	1.35263	1.17699	0.739301	0.849625
Sox2	20.1656	4.43221	15.3512	3.80967	1.31362	1.16341	0.761258	0.859542
NFE2	8.59971	4.40794	6.63025	3.82589	1.29704	1.15214	0.770985	0.867953
Crx	22.7115	5.66765	18.3183	5.05901	1.23982	1.12031	0.806566	0.892612
CEBPB	37.9581	6.37747	30.9182	5.72703	1.2277	1.11358	0.814533	0.898009
HNF4A	34.0912	2.24575	28.0402	2.10495	1.2158	1.06689	0.822505	0.937305
Nr5a2	10.7087	4.97589	9.15457	4.66652	1.16976	1.0663	0.854873	0.937826
BHLHE40	17.6573	11.6469	15.3274	10.9328	1.152	1.06532	0.868052	0.938689
Cebpa	51.4388	5.13388	44.2388	4.83759	1.16275	1.06125	0.860028	0.942287
HOXA13	9.54358	6.16968	8.26419	5.84051	1.15481	1.05636	0.865942	0.946648
Eomes	4.01986	3.01262	3.54236	2.90879	1.1348	1.03569	0.881216	0.965537
AR	25.5604	4.00626	22.6823	3.87528	1.12688	1.0338	0.887402	0.967305
TFAP2A	35.9502	7.94112	32.0163	7.69874	1.12287	1.03148	0.890573	0.969477
Nanog	17.6705	3.54403	15.7699	3.45162	1.12052	1.02677	0.892443	0.973924
CDX2	38.9911	2.87717	34.7081	2.80788	1.1234	1.02468	0.890153	0.975914
Tcf7l1	7.97879	3.27895	7.2253	3.21574	1.10428	1.01965	0.905564	0.980724
JUN	28.2537	3.6461	25.5585	3.58434	1.10545	1.01723	0.904607	0.983062
JUND	39.3855	4.7152	36.4194	4.71066	1.08144	1.00096	0.924692	0.999038
TRIM24	5.2917	2.15311	5.0326	2.18651	1.05149	0.98472	0.951035	1.01552
EOMES	22.769	3.11278	21.6421	3.17163	1.05207	0.981446	0.950508	1.01891
Srf	3.64739	3.16004	3.51168	3.22974	1.03864	0.978417	0.962793	1.02206
E2f4	49.8224	10.3167	47.2387	10.5546	1.05469	0.977462	0.948141	1.02306
Nfic	20.1444	3.4663	19.5957	3.55889	1.028	0.973982	0.972765	1.02671
Tcfcp2l1	36.2914	6.74092	35.4479	6.9926	1.0238	0.964008	0.976757	1.03734
GATA2	18.8802	5.58946	18.3754	5.81892	1.02748	0.960567	0.973258	1.04105
USF2	12.8848	9.79722	12.6345	10.2965	1.01981	0.951507	0.980572	1.05096
USF1	37.0554	6.58817	36.5861	6.94892	1.01283	0.948085	0.987334	1.05476
Esrrb	35.2251	7.25775	35.2384	7.69369	0.999621	0.943338	1.00038	1.06007
CLOCK	6.35791	3.30999	6.43514	3.50909	0.987998	0.943263	1.01215	1.06015
MAX	47.7616	6.67663	47.2986	7.09068	1.00979	0.941606	0.990306	1.06202
GABPA	31.9176	8.67843	31.723	9.23721	1.00614	0.939507	0.993901	1.06439
NANOG	36.2599	4.76856	36.6589	5.08615	0.989115	0.937557	1.011	1.0666
TP63	14.4751	2.96338	14.8046	3.17466	0.977745	0.933447	1.02276	1.0713
Crebbp	14.2157	2.65107	15.0266	2.87226	0.946037	0.922992	1.05704	1.08343
ESRRA	18.2708	7.92777	18.9055	8.7386	0.966428	0.907214	1.03474	1.10228
ESR1	22.9421	3.61186	24.3402	3.99283	0.942562	0.904586	1.06094	1.10548
CTCF	51.9673	5.09973	54.6479	5.65422	0.950949	0.901934	1.05158	1.10873
YY1	29.4141	7.15589	30.9039	7.97644	0.951792	0.897128	1.05065	1.11467
MYC	46.6881	6.78458	48.9104	7.57209	0.954566	0.895998	1.0476	1.11607
E2F6	48.585	8.3179	50.8739	9.30984	0.955007	0.893452	1.04711	1.11925
CTCF	69.3604	7.25178	73.3054	8.13242	0.946185	0.891713	1.05688	1.12144
TAL1	18.358	5.76959	19.5378	6.47075	0.939617	0.891641	1.06426	1.12153
HEY1	48.2216	6.90721	50.6103	7.75326	0.952802	0.890878	1.04954	1.12249
TFAP2C	44.8113	5.28384	48.5687	6.01797	0.922638	0.878011	1.08385	1.13894
Gata1	28.8767	3.40772	32.0036	3.88762	0.902295	0.876556	1.10829	1.14083
Creb	4.97324	3.6239	5.60173	4.16983	0.887805	0.869075	1.12637	1.15065
BRF1	0.863932	2.31412	1.02364	2.67361	0.843978	0.865543	1.18487	1.15534
ZNF263	38.5294	6.78951	42.0594	7.84664	0.916072	0.865276	1.09162	1.1557
Ascl1	16.1497	8.73892	17.4453	10.1131	0.925737	0.864118	1.08022	1.15725
Cebpb	35.9168	3.58396	40.6509	4.1525	0.883541	0.863085	1.13181	1.15863
Ctcf	73.327	8.0517	80.6872	9.34147	0.908781	0.86193	1.10038	1.16019
TP73	2.90977	3.8566	3.31173	4.51945	0.878624	0.853334	1.13814	1.17187
E2F4	47.1415	9.26368	52.0673	10.8887	0.905396	0.850761	1.10449	1.17542
E2f1	41.9453	8.99143	47.4351	10.6876	0.884267	0.841297	1.13088	1.18864
E2F1	46.5699	7.14752	52.7307	8.54807	0.883165	0.836155	1.13229	1.19595
Klf4	44.9789	10.2204	50.9399	12.2296	0.88298	0.83571	1.13253	1.19659
Bcl6	4.45644	1.86485	5.93547	2.23466	0.750815	0.834508	1.33189	1.19831
TCF7L2	48.035	7.08272	56.0667	8.68511	0.856747	0.815501	1.16721	1.22624
LMO2	7.55282	2.69769	9.55807	3.31592	0.790204	0.813558	1.2655	1.22917
LYL1	2.63642	1.87378	3.65077	2.30332	0.722155	0.813515	1.38474	1.22923
ERG	54.0286	7.4815	63.7447	9.2638	0.847578	0.807606	1.17983	1.23823
ESR2	11.6329	5.01236	14.1063	6.2457	0.824658	0.80253	1.21262	1.24606
Spi1	43.31	3.31646	56.5529	4.26647	0.765832	0.777331	1.30577	1.28645
NFKB	48.3663	4.6927	61.0423	6.05238	0.792341	0.775347	1.26208	1.28974
Zfx	33.732	9.58704	42.1166	12.4606	0.800919	0.769391	1.24857	1.29973
VDR	22.5937	5.88238	28.7439	7.72058	0.786036	0.761909	1.27221	1.31249
EBF1	39.2613	5.45619	50.8776	7.25085	0.771682	0.75249	1.29587	1.32892
SPI1	28.7627	5.32026	37.7529	7.12006	0.761869	0.747221	1.31256	1.33829
Npas4	6.59561	2.30962	9.95464	3.11946	0.662566	0.74039	1.50928	1.35064
ERG	42.0495	6.01768	55.6432	8.17518	0.7557	0.736091	1.32328	1.35853
TCF12	41.897	6.90941	55.3291	9.42928	0.757232	0.732761	1.3206	1.3647
CREBBP	30.3865	5.71272	40.4853	7.79899	0.750558	0.732494	1.33234	1.3652
Rela	37.1785	5.83941	50.4558	8.06625	0.736851	0.723932	1.35713	1.38135
ZBTB33	13.2932	7.04606	18.1178	9.88826	0.733711	0.712569	1.36294	1.40337
BATF	18.4534	3.29571	27.0385	4.63259	0.682487	0.711419	1.46523	1.40564
MEIS1	12.2178	3.99756	17.5305	5.63658	0.696945	0.709217	1.43483	1.41001
Foxo1	11.1512	7.78634	15.4016	11.0202	0.724025	0.706553	1.38117	1.41532
NFYA	23.0985	7.4553	32.7375	10.8642	0.705567	0.686225	1.4173	1.45725
GATA1	8.89682	4.31462	13.2095	6.30117	0.673518	0.684733	1.48474	1.46042
Tbp	31.4412	4.41889	46.5316	6.4983	0.675697	0.680008	1.47995	1.47057
GFI1B	23.1935	6.45107	33.5907	9.51085	0.690474	0.678286	1.44828	1.47431
BCL11A	17.7825	3.6998	27.4754	5.50842	0.647214	0.671662	1.54508	1.48884
Nr0b1	14.9257	6.57624	21.6159	9.79607	0.690496	0.671314	1.44823	1.48962
Jund	15.458	3.5147	24.4934	5.30697	0.631106	0.662279	1.58452	1.50994
Jun	12.7843	3.06297	21.0194	4.66601	0.608213	0.656442	1.64416	1.52336
IRF4	26.417	4.9024	41.1338	7.57708	0.64222	0.647005	1.5571	1.54558
Tcf3	34.1757	4.80611	54.0693	7.48785	0.632073	0.641854	1.5821	1.55799
Ebf1	18.6142	4.45359	31.706	7.35102	0.587087	0.605846	1.70332	1.65059
NFY	11.2768	7.15225	18.3629	11.8186	0.614111	0.60517	1.62837	1.65243
TAL1	2.30729	2.33055	4.60151	3.8551	0.50142	0.604537	1.99434	1.65416
STAT2	19.5727	6.2728	32.8803	10.5742	0.595273	0.593221	1.6799	1.68571
GATA2	5.95601	2.35867	12.2875	4.01975	0.484721	0.58677	2.06304	1.70425
Klf1	5.63654	5.79649	9.80468	9.90421	0.574882	0.585255	1.73949	1.70866
Stat5a	17.4513	4.10759	34.6243	7.63736	0.50402	0.537829	1.98405	1.85933
Stat5b	20.8914	4.97555	41.045	9.42922	0.508988	0.527674	1.96468	1.89511
FLI1	9.17598	3.06701	19.91	5.84042	0.460872	0.525135	2.1698	1.90427
Nacc1	7.11053	4.76037	14.4058	9.29401	0.49359	0.512198	2.02597	1.95237
Pou2f2	7.89347	6.28751	15.8689	12.4008	0.497416	0.507026	2.01039	1.97229
Irf4	6.31739	2.81323	15.5205	5.82335	0.407034	0.483094	2.4568	2.06999
RUNX1	5.27694	2.60689	13.4424	5.41228	0.392559	0.481661	2.54739	2.07615
Stat3	10.993	4.72598	24.323	9.86155	0.45196	0.479234	2.21258	2.08667
Lxr	2.46577	3.20749	6.64305	7.3774	0.371181	0.434772	2.6941	2.30006
Tbx3	1.18348	1.79171	5.04192	4.60412	0.234729	0.389153	4.26024	2.56968
Carf	1.18958	3.09145	5.1409	10.715	0.231395	0.288517	4.32161	3.46601
GTF3C	0.329587	1.2617	6.49789	6.5348	0.0507221	0.193073	19.7153	5.17938
*Mouse TFs are designated by capital first letter
**Human TFs are designated by all capital letters

## Sheet: Source_ChIP_mouse
TABLE S14: Overlap of DHS near microbiota regulated genes with TF ChIP datasets
TF	Author	PMID	Cell type	Cell Line	Method	Antibody
Ascl1	Castro	21536733	Neuron	Ventral Telecephelon from E12.5 mouse embryos	ChiP-chip	anti-Ascl1 (Pharmingen)
Bcl6	Barish	21106671	Bone Marrow Derived Macrophage	C57BL/6	ChIP-seq	anti-Bcl6
Bcl6	Barish	21106671	Bone Marrow Derived Macrophage	C57BL/6	ChIP-seq	anti-Bcl6
Bcl6	Barish	21106671	Bone Marrow Derived Macrophage	C57BL/6	ChIP-seq	anti-Bcl6
Carf	Pfenning	20523734	Cortical neuron	C57BL6/129SvJ	ChiP-seq	#4510, Millipore
Cdx2	Nishiyama	19796622	ESC	129S6/SvEvTac	ChIP-seq	anti-CDX-2, BioGenex
Cebpa	MacIsaac	20442865	Hepatocyte	C57BL/6J	ChIP-seq	sc-9314, Santa Cruz
Cebpa	MacIsaac	20442865	Adipocyte	3T3-L1	ChIP-seq	sc-9314, Santa Cruz
Cebpa	Heinz	20513432	Peritoneal Macrophage	C57BL	ChIP-seq	sc-61, Santa Cruz
Cebpb	Lefterova	20176806	Macrophage	C57BL/6J	ChIP-seq	sc-61, Santa Cruz
Cebpb	Heinz	20513432	Peritoneal Macrophage	C57BL	ChIP-seq	sc-150, Santa Cruz
Cebpb	Heinz	20513432	myloid cell	PU.1 -/- C57BL	ChIP-seq	sc-150, Santa Cruz
Cebpb (0h)	Steger	20478996	Adipocyte		ChIP-seq	sc-150, Santa Cruz
Cebpb (0hr)	Heinz	20513432	hematopoietic precursor	PU.1 -/- PUER C57BL	ChIP-seq	sc-150, Santa Cruz
Cebpb (1hr)	Heinz	20513432	hematopoietic precursor	PU.1 -/- PUER C57BL	ChIP-seq	sc-150, Santa Cruz
Cebpb (24hr)	Heinz	20513432	hematopoietic precursor	PU.1 -/- PUER C57BL	ChIP-seq	sc-150, Santa Cruz
Cebpb (48hr)	Heinz	20513432	hematopoietic precursor	PU.1 -/- PUER C57BL	ChIP-seq	sc-150, Santa Cruz
Cebpb (6h)	Steger	20478996	Adipocyte	3T3-L1	ChIP-seq	sc-150, Santa Cruz
Cebpb (6hr)	Heinz	20513432	hematopoietic precursor	PU.1 -/- PUER C57BL	ChIP-seq	sc-150, Santa Cruz
Creb	Kim	20393465	Cortical neuron	C57B6 DIV 7, E16.5	ChIP-seq	Millipore
Creb	Kim	20393465	Cortical neuron	C57B6 DIV 7, E16.5	ChIP-seq	Millipore
Creb	Kim	20393465	Cortical neuron	C57B6 DIV 7, E16.5	ChIP-seq	sc-186, Santa Cruz
Creb	Kim	20393465	Cortical neuron	C57B6 DIV 7, E16.5	ChIP-seq	sc-186, Santa Cruz
Creb	Kim	20393465	Cortical neuron	C57B6 DIV 7, E16.5	ChIP-seq	sc-186, Santa Cruz
Creb	Kim	20393465	Cortical neuron	C57B6 DIV 7, E16.5	ChIP-seq	sc-186, Santa Cruz
Crebbp	Kim	20393465	Cortical neuron	C57B6 DIV 7, E16.5	ChIP-seq	MAB1133, Millipore
Crebbp	Kim	20393465	Cortical neuron	C57B6 DIV 7, E16.5	ChIP-seq	MAB1133, Millipore
Crx	Corbo	20693478	Retinas	CD1 C57BL/6 Crx-/- Nrl -/-, 8wk old mice	ChIP-seq	sc-30150X, Santa Cruz; 12-370, Upstate
Ctcf	Chen	18555785	ESC	E14	ChIP-seq	07-729, Upstate
Ctcf	Stan/Yale TFBS Track	ENCODE	B-lymph	CH12	ChIP-seq	07-728, Millipore
Ctcf	Stan/Yale TFBS Track	ENCODE	Erythroleukemia	MEL	ChIP-seq	07-728, Millipore
Ctcf	Lin	20543837	Progenitor B-lymph	Rag1-/- C57BL/6	ChIP-seq	DAM1421463, Millipore
CTCF	Mikkelsen	20887899	Pre-adipocyte	3T3-L1, day -2 relative to induction	ChIP-seq	07-729, upstate
CTCF	Mikkelsen	20887899	Pre-adipocyte	3T3-L1, day 0	ChIP-seq	07-729, upstate
CTCF	Mikkelsen	20887899	Pre-adipocyte	3T3-L1, day 3	ChIP-seq	07-729, upstate
CTCF	Mikkelsen	20887899	Pre-adipocyte	3T3-L1, day 9	ChIP-seq	07-729, upstate
E2f1	Chen	18555785	ESC	E14	ChIP-seq	05-379, Upstate
E2f4	MacIsaac	20442865	Hepatocyte	C57BL/6J	ChIP-seq	sc-1082X, Santa Cruz
E2f4	MacIsaac	20442865	Adipocyte	3T3-L1	ChIP-seq	sc-1082X, Santa Cruz
E2f4	Stan/Yale TFBS Track	ENCODE	B-lymph	CH12	ChIP-seq	sc-866, Santa Cruz
E2f4	Stan/Yale TFBS Track	ENCODE	Erythroleukemia	MEL	ChIP-seq	sc-866, Santa Cruz
Ebf1	Lin	20543837	Progenitor B-lymph	Rag1-/- C57BL/6	ChIP-seq	H00001879, Abnova
Ebf1	Treiber	20451411	B-cell	A-MuLV	ChiP-seq	anti-EBF1
Eomes	Kidder	20176728	trophoblast	TSC-BK12	ChiP-chip
Erg	Wilson	20887958	Blood stem	HPC7	ChIP-seq	sc354x, Santa Cruz
Esrrb	Chen	18555785	ESC	E14	ChIP-seq	custom made
Fli1	Wilson	20887958	Blood stem	HPC7	ChIP-seq	ab15289-500, Abcam
Fxr	Thomas	20091679	Liver	NA	ChIP-seq	H-130x, Santa Cruz
Fxr	Thomas	20091679	Intestine	NA	ChIP-seq	H-130x, Santa Cruz
Foxa1	MacIsaac	20442865	Hepatocyte	C57BL/6J	ChIP-seq	ab5089, Abcam
Foxa2	MacIsaac	20442865	Hepatocyte	C57BL/6J	ChIP-seq	anti-FOXA2
Foxa2	Robertson	18787082	Liver	C57Bl/6J	ChIP-seq	HNF-3beta (M-0), sc-6554, Santa Cruz
Foxo1	Lin	20543837	Progenitor B-lymph	Rag1-/- C57BL/6	ChIP-seq	sc-11350, Santa Cruz
Gata1	Stan/Yale TFBS Track	ENCODE	Erythroleukemia	MEL	ChIP-seq	custom made (Bresnick, UW Madison)
Gata1	Cheng	19887574	Erythroid progenitor	G1E-ER4	ChIP-seq	anti-GATA1
Gata1 (biotin tagged)	Yu	19941827	Erythroid	MEL86 C57BL/6	ChIP-seq	sc-265, Santa Cruz
Gata2	Wilson	20887958	Blood stem	HPC7	ChIP-seq	sc9008x, Santa Cruz
Gfi1b	Wilson	20887958	Blood stem	HPC7	ChIP-seq	sc8559x, Santa Cruz
Hoxc9 (V5 tagged)	Jung	20826310	Motor Neurons	Ainv15	ChIP-seq	ab15828
Irf4	Kwon	20064451	T-cell	murine CD4+	ChiP-seq	anti-IRF4
Jarid2	Peng	20064375	ESC	LF2	ChIP-seq	Novis Biologicals
Jun	Stan/Yale TFBS Track	ENCODE	B-lymph	CH12	ChIP-seq	sc-1694, Santa Cruz
Jund	Stan/Yale TFBS Track	ENCODE	B-lymph	CH12	ChIP-seq	sc-74, Santa Cruz
Jund	Stan/Yale TFBS Track	ENCODE	Erythroleukemia	MEL	ChIP-seq	sc-74, Santa Cruz
Klf1	Tallack	20508144	Fetal liver erythroid	K1-ER	ChIP-seq	custom made
Klf4	Chen	18555785	ESC	E14	ChIP-seq	custom made
Klf4	Kim	18358816	ESC	J1	ChIP-chip
Klf4	Liu	19030024	ESC	E14.1	ChIP-chip	sc-20691, Santa Cruz
Lmo2	Wilson	20887958	Blood stem	HPC7	ChIP-seq	AF2726, R&D
Lxr (biotin tagged)	Heinz	20513432	Macrophage	RAW264.7	ChIP-seq	M1002-010, SoluLink
Lyl1	Wilson	20887958	Blood stem	HPC7	ChIP-seq	ab30334-200, Abcam
Max	Stan/Yale TFBS Track	ENCODE	B-lymph	CH12	ChIP-seq	sc-197, Santa Cruz
Max	Stan/Yale TFBS Track	ENCODE	Erythroleukemia	MEL	ChIP-seq	sc-197, Santa Cruz
Meis1	Wilson	20887958	Blood stem	HPC7	ChIP-seq	sc-10599x, Santa Cruz
Myc	Chen	18555785	ESC	E14	ChIP-seq	custom made
Myc	Kidder 2008	19079543	ESC	R1	ChIP-chip	N-262, SC-764, Santa Cruz
Myc	Kim	18358816	ESC	J1	ChIP-chip
Myc	Liu	19030024	ESC	E14.1	ChIP-chip	sc-764, Santa Cruz
Myc	Stan/Yale TFBS Track	ENCODE	B-lymph	CH12	ChIP-seq	sc-764, Santa Cruz
Myc	Stan/Yale TFBS Track	ENCODE	Erythroleukemia	MEL	ChIP-seq	sc-764, Santa Cruz
Myc (bio)	Kim	18358816	ESC	J1	ChIP-chip	sc-764x, Santa Cruz
Mycn	Chen	18555785	ESC	E14	ChIP-seq	custom made
Nacc1	Kim	18358816	ESC	J1	ChIP-chip
Nanog	Chen	18555785	ESC	E14	ChIP-seq	REC-RCAB0002PF, Cosmo Bio
Nanog	Kim	18358816	ESC	J1	ChIP-chip
Nanog	Loh	16518401	ESC	E14	ChIP-PET	anti-Nanog (Cosmo Bio)
Nanog	Marson	18692474	ESC	V6.5(C57BL/6-129)	ChIP-seq	bl1662, Bethyl Labs
Nanog (bio)	Kim	18358816	ESC	J1	ChIP-chip	ab21603, Abcam
NFIC	Pjanic		MEF		ChIP-seq	sc-5567, Santa Cruz
Npas4	Kim	20393465	Cortical neuron	C57B6 DIV 7, E16.5	ChIP-seq	custom
Npas4	Kim	20393465	Cortical neuron	C57B6 DIV 7, E16.5	ChIP-seq	custom
Nr0b1	Kim	18358816	ESC	J1	ChIP-chip
Nr3c1	Steger	20478996	Adipocyte	3T3-L1	ChIP-seq	sc-1004, Santa Cruz PA1-511A, Affinity Bioreagents
Nr5a2 (HA-tagged)	Heng	20096661	ESC	iPSC	ChIP-seq	sc-7329, Santa Cruz
Pou2f2	Heinz	20513432	Splenic B-lymph	C57BL	ChIP-seq	sc-150, Santa Cruz
Pou5f1	Chen	18555785	ESC	E14	ChIP-seq	sc-8628, Santa Cruz
Pou5f1	Kim	18358816	ESC	J1	ChIP-chip
Pou5f1	Loh	16518401	ESC	E14	ChIP-PET	sc-8628, Santa Cruz
Pou5f1	Marson	18692474	ESC	V6.5(C57BL/6-129)	ChIP-seq	sc-8628, Santa Cruz
Pparg	Lefterova	20176806	Macrophage	C57BL/6J	ChIP-seq	sc-7196, Santa Cruz
Pparg	Lefterova	20176806	Adipocyte	3T3-L1	ChIP-seq	sc-7196, Santa Cruz
Rela	Barish	21106671	Bone Marrow Derived Macrophage	C57BL/6	ChIP-seq	anti-p65
Rela	Barish	21106671	Bone Marrow Derived Macrophage	C57BL/6	ChIP-seq	anti-p65
Rela	Barish	21106671	Bone Marrow Derived Macrophage	C57BL/6	ChIP-seq	anti-p65
Runx1	Wilson	20887958	Blood stem	HPC7	ChIP-seq	ab23980-100, Abcam
Smad1	Chen	18555785	ESC	E14	ChIP-seq	sc-7965, Santa Cruz
Sox2	Chen	18555785	ESC	E14	ChIP-seq	sc-17320, Santa Cruz
Sox2	Kim	18358816	ESC	J1	ChIP-chip
Sox2	Liu	19030024	ESC	E14.1	ChIP-chip	sc-17320, Santa Cruz
Sox2	Marson	18692474	ESC	V6.5(C57BL/6-129)	ChIP-seq	AF2018, R&D Systems
Spi1	Lefterova	20176806	Macrophage	C57BL/6J	ChIP-seq	sc-352x, Santa Cruz
Spi1	Heinz	20513432	Peritoneal Macrophage	C57BL	ChIP-seq	sc-352, Santa Cruz
Spi1	Heinz	20513432	Splenic B-lymph	C57BL	ChIP-seq	sc-352, Santa Cruz
Spi1	Heinz	20513432	pre-pro B-lymph	E2A -/- C57BL	ChIP-seq	sc-352, Santa Cruz
Spi1	Heinz	20513432	pre-pro B-lymph	EBF -/- C57BL	ChIP-seq	sc-352, Santa Cruz
Spi1	Heinz	20513432	pro B-lymph	RAG1 -/- C57BL	ChIP-seq	sc-352, Santa Cruz
Spi1	Heinz	20513432	pre-pro B-cell	E2A -/-, BHLH-ER transgene C57BL	ChIP-seq	sc-352, Santa Cruz
Spi1	Heinz	20513432	pre-pro B-cell	E2A -/-, E2A-ER transgene C57BL	ChIP-seq	sc-352, Santa Cruz
Spi1	Heinz	20513432	myloid cell	PU.1 -/- C57BL	ChIP-seq	sc-352, Santa Cruz
Spi1	Heinz	20513432	Bone Marrow Derived Macrophage	C57BL	ChIP-seq	sc-352, Santa Cruz
Spi1	Heinz	20513432	Bone Marrow Derived Macrophage	LXR-/- C57BL	ChIP-seq	sc-352, Santa Cruz
Spi1	Wilson	20887958	Blood stem	HPC7	ChIP-seq	sc-352, Santa Cruz
Spi1	Ghisletti	20206554	Bone Marrow Derived Macrophage	Fvb BMDM	ChIP-seq	sc-352, Santa Cruz
Spi1	Ghisletti	20206554	Bone Marrow Derived Macrophage	Fvb BMDM; LPS treated	ChIP-seq	sc-352, Santa Cruz
Spi1 (0hr)	Heinz	20513432	hematopoietic precursor	PU.1 -/- PUER C57BL	ChIP-seq	sc-352, Santa Cruz
Spi1 (1hr)	Heinz	20513432	hematopoietic precursor	PU.1 -/- PUER C57BL	ChIP-seq	sc-352, Santa Cruz
Spi1 (24hr)	Heinz	20513432	hematopoietic precursor	PU.1 -/- PUER C57BL	ChIP-seq	sc-352, Santa Cruz
Spi1 (48hr)	Heinz	20513432	hematopoietic precursor	PU.1 -/- PUER C57BL	ChIP-seq	sc-352, Santa Cruz
Spi1 (6hr)	Heinz	20513432	hematopoietic precursor	PU.1 -/- PUER C57BL	ChIP-seq	sc-352, Santa Cruz
Srf	Kim	20393465	Cortical neuron	C57B6 DIV 7, E16.5	ChIP-seq	sc-13029, Santa Cruz
Srf	Kim	20393465	Cortical neuron	C57B6 DIV 7, E16.5	ChIP-seq	sc-13029, Santa Cruz
Srf	Kim	20393465	Cortical neuron	C57B6 DIV 7, E16.5	ChIP-seq	sc-13029, Santa Cruz
Srf	Kim	20393465	Cortical neuron	C57B6 DIV 7, E16.5	ChIP-seq	sc-13029, Santa Cruz
Stat3	Chen	18555785	ESC	E14	ChIP-seq	sc-482, Santa Cruz
Stat3	Kidder 2008	19079543	ESC	R1	ChIP-chip	C-20, SC-482, Santa Cruz
Stat3	Kwon	20064451	T-cell	murine CD4+	ChiP-seq	anti-Stat3
Stat5a (13h)	Liao	18820682	T helper	custom made	ChIP-seq	R&D systems
Stat5a (8h)	Liao	18820682	T helper	custom made	ChIP-seq	R&D systems
Stat5b (13h)	Liao	18820682	T helper	custom made	ChIP-seq	R&D systems
Stat5b (8h)	Liao	18820682	T helper	custom made	ChIP-seq	R&D systems
Tal1	Wilson	19346495	Blood stem	HPC-7	ChIP-seq	anti-SCL
Tal1	Wilson	20887958	Blood stem	HPC7	ChIP-seq	sc12984x, Santa Cruz
Tbp	Stan/Yale TFBS Track	ENCODE	B-lymph	CH12	ChIP-seq	ab62126, Abcam
Tbp	Stan/Yale TFBS Track	ENCODE	Erythroleukemia	MEL	ChIP-seq	ab992, Abcam
Tbx3	Han	20139965	iPS	OSKT #1,2,4,6,11-22; OSK #1-3,12-14,16-22; OSE #1,2,9.	ChIP-seq	sc-31657, Santa Cruz
Tcf3	Lin	20543837	Progenitor B-lymph	Ebf-/- C57BL/6	ChIP-seq	sc-349, Santa Cruz
Tcf3	Lin	20543837	Progenitor B-lymph	Rag1-/- C57BL/6	ChIP-seq	sc-349, Santa Cruz
Tcf3 (E47-ER transgene, 1hr)	Lin	20543837	Progenitor B-lymph	E2A-/- C57BL/6	ChIP-seq	sc-349, Santa Cruz
Tcf3 (E47-ER transgene, 6hr)	Lin	20543837	Progenitor B-lymph	E2A-/- C57BL/6	ChIP-seq	sc-349, Santa Cruz
Tcf3 (E47-ER transgene, 6hr)	Lin	20543837	T cell	E2A-/- C57BL/6	ChIP-seq	sc-349, Santa Cruz
Tcf7l1	Marson	18692474	ESC	V6.5(C57BL/6-129)	ChIP-seq	sc-8635, Santa Cruz
Tcfcp2l1	Chen	18555785	ESC	E14	ChIP-seq	custom made
Usf2	Stan/Yale TFBS Track	ENCODE	B-lymph	CH12	ChIP-seq	ab60931, Abcam
Usf2	Stan/Yale TFBS Track	ENCODE	Erythroleukemia	MEL	ChIP-seq	ab62126, Abcam
Zfp281	Kim	18358816	ESC	J1	ChIP-chip
Zfp42	Kim	18358816	ESC	J1	ChIP-chip
Zfx	Chen	18555785	ESC	E14	ChIP-seq	custom made

## Sheet: Source_ChIP_human
TABLE S14: Overlap of DHS near microbiota regulated genes with TF ChIP datasets
TF	Author	PMID	Cell type	Cell Line	Method	Antibody
AR	Yu	20478527	Prostate Cancer	VCaP (ethanol)	ChiP-seq	06-680, Millipore
AR	Yu	20478527	Prostate Cancer	VCaP (R1881 treated)	ChiP-seq	06-680, Millipore
AR	Yu	20478527	Prostate Cancer	LnCaP (ethanol)	ChiP-seq	06-680, Millipore
AR	Yu	20478527	Prostate Cancer	LnCaP (R1881 treated)	ChiP-seq	06-680, Millipore
ATF3	Yale TFBS Track	ENCODE	Leukemia	K562	ChIP-seq	sc-188, Santa Cruz
BATF	HAIB TFBS Track	ENCODE	B-lymph	GM12878	ChIP-seq	sc-100974, Santa Cruz
BATF	HAIB TFBS Track	ENCODE	B-lymph	GM12878	ChIP-seq	sc-100974, Santa Cruz
BCL11A	HAIB TFBS Track	ENCODE	B-lymph	GM12878	ChIP-seq	ab19489, Abcam
BCL11A	HAIB TFBS Track	ENCODE	B-lymph	GM12878	ChIP-seq	ab19489, Abcam
BHLHE40	HAIB TFBS Track	ENCODE	Liver	HepG2	ChIP-seq	sc-101023, Santa Cruz
BHLHE40	HAIB TFBS Track	ENCODE	Liver	HepG2	ChIP-seq	sc-101023, Santa Cruz
BRF1	Oler	20418882	Epithelial	HeLa	ChiP-seq	anti-BRF1 (R. Roeder)
BRF2	Oler	20418882	Epithelial	HeLa	ChiP-seq	ab17011, abcam
CDX2	Verzi	21074721	Intestinal	proliferating Caco-2	ChIP-seq	BL3194, Bethyl
CDX2	Verzi	21074721	Intestinal	differentiated Caco-2	ChIP-seq	BL3194, Bethyl
CEBPB	Yale TFBS Track	ENCODE	Liver	HepG2 (forskolin)	ChIP-seq	sc-150, Santa Cruz
CLOCK	Alhopuro	20551151	Colorectal Cancer	293T	ChIP-seq	antiV4, invitrogen
CREBBP	Hollenhorst	20019798	T cells	Jurkat	ChIP-seq	A-22, Santa Cruz
CTCF	HAIB TFBS Track	ENCODE	Epithelial	A549(DEX)	ChIP-seq	07-729, Millipore
CTCF	HAIB TFBS Track	ENCODE	Epithelial	A549(DEX)	ChIP-seq	07-729, Millipore
CTCF	HAIB TFBS Track	ENCODE	Epithelial	A549(EtOH)	ChIP-seq	07-729, Millipore
CTCF	HAIB TFBS Track	ENCODE	Epithelial	A540(EtOH)	ChIP-seq	07-729, Millipore
CTCF	Kim	17382889	Fibroblast	IMR90	ChIP-chip	mixture of 9 monoclonal antibodies (Pugacheva et al., 2005)
CTCF	Kunarso	20526341	ESC	H1-hESC	ChiP-seq	07-729, Upstate
CTCF	Cuddapah	19056695	T-cell	CD4+	ChIP-seq	07-729, upstate
CTCF	Cuddapah	19056695	Epithelial	HeLa	ChIP-seq	07-729, upstate
CTCF	Cuddapah	19056695	T-lymph	Jurkat	ChIP-seq	07-729, upstate
CTCF	Mikkelsen	20887899	Pre-adipocyte	ASC, day -2 relative to induction	ChIP-seq	07-729, upstate
CTCF	Mikkelsen	20887899	Pre-adipocyte	ASC, day 0	ChIP-seq	07-729, upstate
CTCF	Mikkelsen	20887899	Pre-adipocyte	ASC, day 3	ChIP-seq	07-729, upstate
CTCF	Mikkelsen	20887899	Pre-adipocyte	ASC, day 9	ChIP-seq	07-729, upstate
E2F1	Yale TFBS Track	ENCODE	Epithelial	HeLa-S3	ChIP-seq	05-379, Millipore
E2F1	Yale TFBS Track	ENCODE	Breast Cancer	MCF-7	ChIP-seq	MMS-101P, Covance
E2F1	Liu	20622854	Epithelial	HeLa	ChIP-seq	sc-193 & sc-22820, Santa Cruz
E2F1(Ha)	Yale TFBS Track	ENCODE	Epithelial	HeLa-S3	ChIP-seq	MMS-101P, Covance
E2F4	Yale TFBS Track	ENCODE	Epithelial	HeLa-S3	ChIP-seq	sc-866, Santa Cruz
E2F4	Yale TFBS Track	ENCODE	Leukemia	K562	ChIP-seq	sc-866, Santa Cruz
E2F6	Yale TFBS Track	ENCODE	Epithelial	HeLa-S3	ChIP-seq	sc-22823, Santa Cruz
E2F6	Yale TFBS Track	ENCODE	Leukemia	K562	ChIP-seq	sc-22823, Santa Cruz
EBF1	HAIB TFBS Track	ENCODE	B-lymph	GM12878	ChIP-seq	sc-137065, Santa Cruz
EBF1	HAIB TFBS Track	ENCODE	B-lymph	GM12878	ChIP-seq	sc-137065, Santa Cruz
EGR1	HAIB TFBS Track	ENCODE	B-lymph	GM12878	ChIP-seq	sc-110, Santa Cruz
EGR1	HAIB TFBS Track	ENCODE	B-lymph	GM12878	ChIP-seq	sc-110, Santa Cruz
EGR1	HAIB TFBS Track	ENCODE	Leukemia	K562	ChIP-seq	sc-110, Santa Cruz
EGR1	HAIB TFBS Track	ENCODE	Leukemia	K562	ChIP-seq	sc-110, Santa Cruz
EOMES	Teo	21245162	ESC	H9 hESC	ChIP-seq	ab23345, Abcam
ERG	Yu	20478527	Prostate Cancer	VCaP	ChiP-seq	sc354x, Santa Cruz
ERG	Yu	20478527	Prostate Cancer	LNCaP	ChiP-seq	sc354x, Santa Cruz
ESR1	Stender	20547749	Breast Cancer	DVDmut-ER MDA-MB	ChiP-seq	HC20, Santa Cruz
ESR1	Stender	20547749	Breast Cancer	MDA-MB	ChiP-seq	HC20, Santa Cruz
ESR1	Stunnenberg	19339991	Breast Cancer	MCF-7	ChiP-seq	AC-066-100, Diagenode
ESR1	Stunnenberg	19339991	Breast Cancer	MCF-7 (E2 treated)	ChiP-seq	AC-066-100, Diagenode
ESR1	Stunnenberg	19339991	Breast Cancer	MCF-7 (Tamoxifen treated)	ChiP-seq	AC-066-100, Diagenode
ESR1	Stunnenberg	19339991	Breast Cancer	MCF-7 (Fulvestrant treated)	ChiP-seq	AC-066-100, Diagenode
ESR1	Fullwood	19890323	Breast Cancer	MCF-7	ChiA-PET	HC-20, Santa Cruz
ESR1	Fullwood	19890323	Breast Cancer	MCF-7	ChiA-PET	HC-20, Santa Cruz
ESR1	Fullwood	19890323	Breast Cancer	MCF-7	ChiA-PET	HC-20, Santa Cruz
ESR1	Fullwood	19890323	Breast Cancer	MCF-7	ChiA-PET	HC-20, Santa Cruz
ESR1	Hu	20056654	Breast Cancer	MCF7	ChIP-seq	sc-543x, Santa Cruz
ESR1	Barton	unknown	Breast Cancer	MCF7	ChIP-seq	F-10, santa cruz
ESR1	Barton	unknown	Breast Cancer	MCF7	ChIP-seq	F-10, santa cruz
ESR1	Joseph	21179027	Breast Cancer	MCF-7 (ethanol)	ChIP-seq	sc-543, Santa Cruz
ESR1	Joseph	21179027	Breast Cancer	MCF-7 (estradiol)	ChIP-seq	sc-543, Santa Cruz
ESR1	Joseph	21179027	Breast Cancer	T47D (ethanol)	ChIP-seq	sc-543, Santa Cruz
ESR1	Joseph	21179027	Breast Cancer	T47D (estradiol)	ChIP-seq	sc-543, Santa Cruz
ESR1	Joseph	21179027	Breast Cancer	Ishikawa (ethanol)	ChIP-seq	sc-543, Santa Cruz
ESR1	Joseph	21179027	Breast Cancer	Ishikawa (estradiol)	ChIP-seq	sc-543, Santa Cruz
ESR1	Joseph	21179027	Breast Cancer	ECC1 (ethanol)	ChIP-seq	sc-543, Santa Cruz
ESR1	Joseph	21179027	Breast Cancer	ECC1 (estradiol)	ChIP-seq	sc-543, Santa Cruz
ESR2	Vivar	20404318	osteosarcoma	U2OS	ChiP-seq	unreported
ESR2	Vivar	20404318	osteosarcoma	U2OS	ChiP-seq	unreported
ESRRA	Yale TFBS Track	ENCODE	Liver	HepG2 (forskolin)	ChIP-seq	sc-66882, Santa Cruz
ETS1	Hollenhorst	20019798	T cells	Jurkat	ChIP-seq	sc-355, Santa Cruz
FOS	Yale TFBS Track	ENCODE	B-lymph	GM12878	ChIP-seq	sc-7202, Santa Cruz
FOS	Yale TFBS Track	ENCODE	Epithelial	HeLa-S3	ChIP-seq	sc-7202, Santa Cruz
FOS	Yale TFBS Track	ENCODE	Leukemia	K562	ChIP-seq	sc-7202, Santa Cruz
FOSL2	HAIB TFBS Track	ENCODE	Liver	HepG2	ChIP-seq	sc-604, Santa Cruz
FOSL2	HAIB TFBS Track	ENCODE	Liver	HepG2	ChIP-seq	sc-604, Santa Cruz
FOXA1	Yu	20478527	Prostate Cancer	VCaP	ChiP-seq	ab23738, Abcam
FOXA1	Yu	20478527	Prostate Cancer	LnCaP	ChiP-seq	ab23738, Abcam
FOXC2	Norrmen	19398761	LEC	iLEC	ChIP-chip	rat anti-mouse Foxc2 (Furumoto et al, 1999)
FOXP2	HAIB TFBS Track	ENCODE	Neuroepithelial	PFSK-1	ChIP-seq	ab16046, Abcam
FOXP2	HAIB TFBS Track	ENCODE	Neuroepithelial	PFSK-1	ChIP-seq	ab16046, Abcam
FOXP2	HAIB TFBS Track	ENCODE	Neuroblastoma	SK-N-MC	ChIP-seq	ab16046, Abcam
FOXP2	HAIB TFBS Track	ENCODE	Neuroblastoma	SK-N-MC	ChIP-seq	ab16046, Abcam
GABPA	HAIB TFBS Track	ENCODE	B-lymph	GM12878	ChIP-seq	sc-28312, Santa Cruz
GABPA	HAIB TFBS Track	ENCODE	B-lymph	GM12878	ChIP-seq	sc-28312, Santa Cruz
GABPA	HAIB TFBS Track	ENCODE	Leukemia	K562	ChIP-seq	sc-28312, Santa Cruz
GABPA	HAIB TFBS Track	ENCODE	Leukemia	K562	ChIP-seq	sc-28312, Santa Cruz
GABPA	HAIB TFBS Track	ENCODE	Epithelial	HeLa-S3	ChIP-seq	sc-28312, Santa Cruz
GABPA	HAIB TFBS Track	ENCODE	Epithelial	HeLa-S3	ChIP-seq	sc-28312, Santa Cruz
GABPA	HAIB TFBS Track	ENCODE	Liver	HepG2	ChIP-seq	sc-28312, Santa Cruz
GABPA	HAIB TFBS Track	ENCODE	Liver	HepG2	ChIP-seq	sc-28312, Santa Cruz
GATA1	Yale TFBS Track	ENCODE	Leukemia	K562	ChIP-seq	custom made (Bresnick, UW Madison)
GATA2	Yale TFBS Track	ENCODE	Leukemia	K562	ChIP-seq	custom made (Bresnick, UW Madison)
GATA6	Verzi	21074721	Intestinal	proliferating Caco-2	ChIP-seq	9055, Santa Cruz
GATA6	Verzi	21074721	Intestinal	differentiated Caco-2	ChIP-seq	9055, Santa Cruz
GTF3C	Oler	20418882	Epithelial	HeLa	ChiP-seq	A301-242A, Bethyl Laboratories
HEY1	HAIB TFBS Track	ENCODE	Leukemia	K562	ChIP-seq	sc-16424, Santa Cruz
HEY1	HAIB TFBS Track	ENCODE	Leukemia	K562	ChIP-seq	sc-16424, Santa Cruz
HEY1	HAIB TFBS Track	ENCODE	Liver	HepG2	ChIP-seq	sc-16424, Santa Cruz
HEY1	HAIB TFBS Track	ENCODE	Liver	HepG2	ChIP-seq	sc-16424, Santa Cruz
HNF4A	Yale TFBS Track	ENCODE	Liver	HepG2 (forskolin)	ChIP-seq	sc-6556, Santa Cruz
HNF4A	Verzi	21074721	Intestinal	proliferating Caco-2	ChIP-seq	6547, Santa Cruz
HNF4A	Verzi	21074721	Intestinal	differentiated Caco-2	ChIP-seq	6547, Santa Cruz
HOXA13	Rinn	18245445	Fibroblasts	Rinn et al. 2006	ChIP-chip	anti-HOXA 13, Knosp et al. 2004
HSF1	Yale TFBS Track	ENCODE	Liver	HepG2 (forskolin)	ChIP-seq	sc-9144, Santa Cruz
IRF4	HAIB TFBS Track	ENCODE	B-lymph	GM12878	ChIP-seq	sc-6059, Santa Cruz
IRF4	HAIB TFBS Track	ENCODE	B-lymph	GM12878	ChIP-seq	sc-6059, Santa Cruz
JUN	Yale TFBS Track	ENCODE	Endothelial	HUVEC	ChIP-seq	sc-1694, Santa Cruz
JUN	Yale TFBS Track	ENCODE	Epithelial	HeLa-S3	ChIP-seq	sc-1694, Santa Cruz
JUN	Yale TFBS Track	ENCODE	Leukemia	K562	ChIP-seq	sc-1694, Santa Cruz
JUN	Yale TFBS Track	ENCODE	Leukemia	K562 (IFNa-6h)	ChIP-seq	sc-1694, Santa Cruz
JUN	Yale TFBS Track	ENCODE	Leukemia	K562 (IFNg-30m)	ChIP-seq	sc-1694, Santa Cruz
JUN	Yale TFBS Track	ENCODE	Leukemia	K562 (IFNg-6h)	ChIP-seq	sc-1694, Santa Cruz
JUND	HAIB TFBS Track	ENCODE	Liver	HepG2	ChIP-seq	sc-74, Santa Cruz
JUND	HAIB TFBS Track	ENCODE	Liver	HepG2	ChIP-seq	sc-74, Santa Cruz
JUND	Yale TFBS Track	ENCODE	B-lymph	GM12878	ChIP-seq	sc-74, Santa Cruz
JUND	Yale TFBS Track	ENCODE	Epithelial	HeLa-S3	ChIP-seq	sc-74, Santa Cruz
JUND	Yale TFBS Track	ENCODE	Leukemia	K562	ChIP-seq	sc-74, Santa Cruz
MAX	Yale TFBS Track	ENCODE	B-lymph	GM12878	ChIP-seq	sc-197, Santa Cruz
MAX	Yale TFBS Track	ENCODE	Endothelial	HUVEC	ChIP-seq	sc-197, Santa Cruz
MAX	Yale TFBS Track	ENCODE	Epithelial	HeLa-S3	ChIP-seq	sc-197, Santa Cruz
MAX	Yale TFBS Track	ENCODE	Leukemia	K562	ChIP-seq	sc-197, Santa Cruz
MYC	Yale TFBS Track	ENCODE	Epithelial	HeLa-S3	ChIP-seq	sc-764, Santa Cruz
MYC	Yale TFBS Track	ENCODE	Leukemia	K562	ChIP-seq	sc-764, Santa Cruz
MYC	Yale TFBS Track	ENCODE	Leukemia	K562 (IFNa-30m)	ChIP-seq	sc-764, Santa Cruz
MYC	Yale TFBS Track	ENCODE	Leukemia	K562 (IFNa-6h)	ChIP-seq	sc-764, Santa Cruz
MYC	Yale TFBS Track	ENCODE	Leukemia	K562 (IFNg-6h)	ChIP-seq	sc-764, Santa Cruz
NANOG	Boyer	16153702	ESC	H9	ChIP-chip	AF1997, R&D Systems
NANOG	Kunarso	20526341	ESC	H1-hESC	ChiP-seq	AF1997, R&D
NFE2	Yale TFBS Track	ENCODE	Leukemia	K562	ChIP-seq	sc-291, Santa Cruz
NFKB	Yale TFBS Track	ENCODE	B-lymph	GM12878	ChIP-seq	sc-372, Santa Cruz
NFKB (Igg-rab)	Yale TFBS Track	ENCODE	B-lymph	GM12878	ChIP-seq	sc-372, Santa Cruz
NFKB (IgG-rab)	Yale TFBS Track	ENCODE	Lymphoblastoid	GM10847	ChIP-seq	sc-372, Santa Cruz
NFKB (IgG-rab)	Yale TFBS Track	ENCODE	Lymphoblastoid	GM12891	ChIP-seq	sc-372, Santa Cruz
NFKB (IgG-rab)	Yale TFBS Track	ENCODE	Lymphoblastoid	GM12892	ChIP-seq	sc-372, Santa Cruz
NFKB (IgG-rab)	Yale TFBS Track	ENCODE	Lymphoblastoid	GM15510	ChIP-seq	sc-372, Santa Cruz
NFKB (IgG-rab)	Yale TFBS Track	ENCODE	Lymphoblastoid	GM18505	ChIP-seq	sc-372, Santa Cruz
NFKB (IgG-rab)	Yale TFBS Track	ENCODE	Lymphoblastoid	GM18526	ChIP-seq	sc-372, Santa Cruz
NFKB (IgG-rab)	Yale TFBS Track	ENCODE	Lymphoblastoid	GM18951	ChIP-seq	sc-372, Santa Cruz
NFKB (IgG-rab)	Yale TFBS Track	ENCODE	Lymphoblastoid	GM19099	ChIP-seq	sc-372, Santa Cruz
NFKB (IgG-rab)	Yale TFBS Track	ENCODE	Lymphoblastoid	GM19193	ChIP-seq	sc-372, Santa Cruz
NFY	Reed	18654640	Liver	HepG2	ChIP-chip	sc-8984, Santa Cruz
NFYA	Yale TFBS Track	ENCODE	Leukemia	K562	ChIP-seq	custom made (Mantovani, U Studi di Milano)
NFYB	Yale TFBS Track	ENCODE	Leukemia	K562	ChIP-seq	custom made (Mantovani, U Studi di Milano)
NR2C2	Yale TFBS Track	ENCODE	B-lymph	GM12878	ChIP-seq	custom made (Engel, UMich)
NR2C2	Yale TFBS Track	ENCODE	Epithelial	HeLa-S3	ChIP-seq	custom made (Engel UMich)
NR2C2	Yale TFBS Track	ENCODE	Leukemia	K562	ChIP-seq	custom made (Engel UMich)
NR2C2	Yale TFBS Track	ENCODE	Liver	HepG2	ChIP-seq	custom made (Engel UMich)
NR3C1	HAIB TFBS Track	ENCODE	Epithelial	A549(DEX50)	ChIP-seq	sc-1004, Santa Cruz
NR3C1	HAIB TFBS Track	ENCODE	Epithelial	A549(DEX50)	ChIP-seq	sc-1004, Santa Cruz
NR3C1	HAIB TFBS Track	ENCODE	Epithelial	A549(DEX5)	ChIP-seq	sc-1004, Santa Cruz
NR3C1	HAIB TFBS Track	ENCODE	Epithelial	A549(DEX5)	ChIP-seq	sc-1004, Santa Cruz
NR3C1	HAIB TFBS Track	ENCODE	Epithelial	A549(DEX500)	ChIP-seq	sc-1004, Santa Cruz
NR3C1	HAIB TFBS Track	ENCODE	Epithelial	A549(DEX500)	ChIP-seq	sc-1004, Santa Cruz
NR3C1	HAIB TFBS Track	ENCODE	Epithelial	A549	ChIP-seq	sc-1004, Santa Cruz
NR3C1	Yale TFBS Track	ENCODE	Liver	HepG2 (forskolin)	ChIP-seq	sc-1002, Santa Cruz
NRF1	Yale TFBS Track	ENCODE	Epithelial	HeLa-S3	ChIP-seq	ab55744, Abcam
PAX5(C20)	HAIB TFBS Track	ENCODE	B-lymph	GM12878	ChIP-seq	sc-1974, Santa Cruz
PAX5(C20)	HAIB TFBS Track	ENCODE	B-lymph	GM12878	ChIP-seq	sc-1974, Santa Cruz
PAX5(N19)	HAIB TFBS Track	ENCODE	B-lymph	GM12878	ChIP-seq	sc-1975, Santa Cruz
PAX5(N19)	HAIB TFBS Track	ENCODE	B-lymph	GM12878	ChIP-seq	sc-1975, Santa Cruz
PBX3	HAIB TFBS Track	ENCODE	B-lymph	GM12878	ChIP-seq	sc-891, Santa Cruz
PBX3	HAIB TFBS Track	ENCODE	B-lymph	GM12878	ChIP-seq	sc-891, Santa Cruz
POU2F2	HAIB TFBS Track	ENCODE	B-lymph	GM12878	ChIP-seq	sc-233, Santa Cruz
POU2F2	HAIB TFBS Track	ENCODE	B-lymph	GM12878	ChIP-seq	sc-233, Santa Cruz
POU2F2	HAIB TFBS Track	ENCODE	B-lymph	GM12891	ChIP-seq	sc-233, Santa Cruz
POU2F2	HAIB TFBS Track	ENCODE	B-lymph	GM12891	ChIP-seq	sc-233, Santa Cruz
POU5F1	Kunarso	20526341	ESC	H1-hESC	ChiP-seq	AB19857, Abcam
POU5F1	Boyer	16153702	ESC	H9	ChIP-chip	AF2018, R&D Systems
PPARGC1A	Yale TFBS Track	ENCODE	Liver	HepG2 (forskolin)	ChIP-seq	sc-13067, Santa Cruz
REST	HAIB TFBS Track	ENCODE	B-lymph	GM12878	ChIP-seq	David Anderson, Caltech
REST	HAIB TFBS Track	ENCODE	B-lymph	GM12878	ChIP-seq	David Anderson, Caltech
REST	HAIB TFBS Track	ENCODE	Leukemia	K562	ChIP-seq	David Anderson, Caltech
REST	HAIB TFBS Track	ENCODE	Leukemia	K562	ChIP-seq	David Anderson, Caltech
REST	HAIB TFBS Track	ENCODE	ESC	H1-hESC	ChIP-seq	David Anderson, Caltech
REST	HAIB TFBS Track	ENCODE	ESC	H1-hESC	ChIP-seq	David Anderson, Caltech
REST	HAIB TFBS Track	ENCODE	Liver	HepG2	ChIP-seq	David Anderson, Caltech
REST	HAIB TFBS Track	ENCODE	Liver	HepG2	ChIP-seq	David Anderson, Caltech
REST	HAIB TFBS Track	ENCODE	Neuroblastoma	BE2_C	ChIP-seq	David Anderson, Caltech
REST	HAIB TFBS Track	ENCODE	Neuroblastoma	BE2_C	ChIP-seq	David Anderson, Caltech
REST	HAIB TFBS Track	ENCODE	PancreaticCancer	PANC-1	ChIP-seq	David Anderson, Caltech
REST	HAIB TFBS Track	ENCODE	PancreaticCancer	PANC-1	ChIP-seq	David Anderson, Caltech
REST	HAIB TFBS Track	ENCODE	Neuroepithelial	PFSK-1	ChIP-seq	David Anderson, Caltech
REST	HAIB TFBS Track	ENCODE	Neuroepithelial	PFSK-1	ChIP-seq	David Anderson, Caltech
REST	HAIB TFBS Track	ENCODE	Neuroblastoma	SK-N-SH_RA	ChIP-seq	David Anderson, Caltech
REST	HAIB TFBS Track	ENCODE	Neuroblastoma	SK-N-SH_RA	ChIP-seq	David Anderson, Caltech
REST	HAIB TFBS Track	ENCODE	Glioblastoma	U87	ChIP-seq	David Anderson, Caltech
REST	HAIB TFBS Track	ENCODE	Glioblastoma	U87	ChIP-seq	David Anderson, Caltech
RUNX	Hollenhorst	20019798	T cells	Jurkat	ChIP-seq	α3.2.3.1
RXRA	HAIB TFBS Track	ENCODE	Liver	HepG2	ChIP-seq	sc-553, Santa Cruz
RXRA	HAIB TFBS Track	ENCODE	Liver	HepG2	ChIP-seq	sc-553, Santa Cruz
SIX5	HAIB TFBS Track	ENCODE	Leukemia	K562	ChIP-seq	sc-55706, Santa Cruz
SIX5	HAIB TFBS Track	ENCODE	Leukemia	K562	ChIP-seq	sc-55706, Santa Cruz
SOX2	Boyer	16153702	ESC	H9	ChIP-chip	AF1759, R&D Systems; sc-8628, sc-9081, Santa Cruz
SP1	HAIB TFBS Track	ENCODE	B-lymph	GM12878	ChIP-seq	sc-17824, Santa Cruz
SP1	HAIB TFBS Track	ENCODE	B-lymph	GM12878	ChIP-seq	sc-17824, Santa Cruz
SP1	Reed	18654640	Liver	HepG2	ChIP-chip	sc-59, Santa Cruz
SPI1	HAIB TFBS Track	ENCODE	B-lymph	GM12878	ChIP-seq	sc-22805, Santa Cruz
SPI1	HAIB TFBS Track	ENCODE	B-lymph	GM12878	ChIP-seq	sc-22805, Santa Cruz
SPI1	HAIB TFBS Track	ENCODE	Leukemia	K562	ChIP-seq	sc-22805, Santa Cruz
SPI1	HAIB TFBS Track	ENCODE	Leukemia	K562	ChIP-seq	sc-22805, Santa Cruz
SPI1	HAIB TFBS Track	ENCODE	Lymphoblastoid	GM12891	ChIP-seq	sc-22805, Santa Cruz
SPI1	HAIB TFBS Track	ENCODE	Lymphoblastoid	GM12891	ChIP-seq	sc-22805, Santa Cruz
SREBF1	Yale TFBS Track	ENCODE	Liver	HepG2 (insulin)	ChIP-seq	sc-8984, Santa Cruz
SREBF1	Yale TFBS Track	ENCODE	Liver	HepG2 (pravastatin)	ChIP-seq	sc-8984, Santa Cruz
SREBF2	Yale TFBS Track	ENCODE	Liver	HepG2 (pravastatin)	ChIP-seq	10007662, Cayman Chemical
SRF	HAIB TFBS Track	ENCODE	B-lymph	GM12878	ChIP-seq	sc-335, Santa Cruz
SRF	HAIB TFBS Track	ENCODE	B-lymph	GM12878	ChIP-seq	sc-335, Santa Cruz
SRF	HAIB TFBS Track	ENCODE	Leukemia	K562	ChIP-seq	sc-335, Santa Cruz
SRF	HAIB TFBS Track	ENCODE	Leukemia	K562	ChIP-seq	sc-335, Santa Cruz
SRF	HAIB TFBS Track	ENCODE	Liver	HepG2	ChIP-seq	sc-335, Santa Cruz
STAT1	Yale TFBS Track	ENCODE	Epithelial	HeLa-S3 (IFNg-30m)	ChIP-seq	sc-345, Santa Cruz
STAT1	Yale TFBS Track	ENCODE	Leukemia	K562 (IFNa-30m)	ChIP-seq	sc-345, Santa Cruz
STAT1	Yale TFBS Track	ENCODE	Leukemia	K562 (IFNa-6h)	ChIP-seq	sc-345, Santa Cruz
STAT1	Yale TFBS Track	ENCODE	Leukemia	K562 (IFNg-30m)	ChIP-seq	sc-345, Santa Cruz
STAT1	Yale TFBS Track	ENCODE	Leukemia	K562 (IFNg-6h)	ChIP-seq	sc-345, Santa Cruz
STAT2	Yale TFBS Track	ENCODE	Leukemia	K562 (IFNa-30m)	ChIP-seq	sc-476x, Santa Cruz
STAT2	Yale TFBS Track	ENCODE	Leukemia	K562 (IFNa-6h)	ChIP-seq	sc-476x, Santa Cruz
TAL1	Zizhen	unknown	T-cell	Jurkat	ChIP-seq	sc-129884, Santa Cruz
TAL1	Zizhen	unknown	Pro-erythroblasts	CD34+	ChIP-seq	sc-129884, Santa Cruz
TCF12	HAIB TFBS Track	ENCODE	B-lymph	GM12878	ChIP-seq	sc-357, Santa Cruz
TCF12	HAIB TFBS Track	ENCODE	B-lymph	GM12878	ChIP-seq	sc-357, Santa Cruz
TCF7L2	Yale TFBS Track	ENCODE	Epithelial	HCT-116	ChIP-seq	H2569S, Cell Signaling Tech
TFAP2A	Yale TFBS Track	ENCODE	Epithelial	HeLa-S3	ChIP-seq	sc-8975, Santa Cruz
TFAP2C	Yale TFBS Track	ENCODE	Epithelial	HeLa-S3	ChIP-seq	sc-8977, Santa Cruz
TFAP2C	Woodfield	20629094	Breast Cancer	MCF-7	ChIP-seq	sc-12762x, Santa Cruz
TP63	Rinne	20808887	Keratinocytes	HKC	ChiP-seq	4A4, Abcam and H129, Santa Cruz
TP63	Rinne	20808887	Keratinocytes	HKC	ChiP-seq	4A4, Abcam and H129, Santa Cruz
TP63	Rinne	20808887	Keratinocytes	HKC	ChiP-seq	4A4, Abcam and H129, Santa Cruz
TP73	Yang	20644729	Cervical carcinoma	ME180	ChIP-chip	11C12 anti-p73
TRIM24	Barton	unknown	Breast Cancer	MCF7	ChIP-seq	anti-TRIM24, Novus Biological
TRIM24	Barton	unknown	Breast Cancer	MCF7	ChIP-seq	anti-TRIM24, Novus Biological
USF1	HAIB TFBS Track	ENCODE	B-lymph	GM12878	ChIP-seq	sc-229, Santa Cruz
USF1	HAIB TFBS Track	ENCODE	B-lymph	GM12878	ChIP-seq	sc-229, Santa Cruz
USF1	HAIB TFBS Track	ENCODE	Leukemia	K562	ChIP-seq	sc-229, Santa Cruz
USF1	HAIB TFBS Track	ENCODE	Leukemia	K562	ChIP-seq	sc-229, Santa Cruz
USF1	HAIB TFBS Track	ENCODE	Liver	HepG2	ChIP-seq	sc-229, Santa Cruz
USF1	HAIB TFBS Track	ENCODE	Liver	HepG2	ChIP-seq	sc-229, Santa Cruz
USF1	HAIB TFBS Track	ENCODE	Epithelial	A549(DEX)	ChIP-seq	sc-229, Santa Cruz
USF1	HAIB TFBS Track	ENCODE	Epithelial	A549(DEX)	ChIP-seq	sc-229, Santa Cruz
USF1	HAIB TFBS Track	ENCODE	Epithelial	A549(EtOH)	ChIP-seq	sc-229, Santa Cruz
USF1	HAIB TFBS Track	ENCODE	Epithelial	A549(EtOH)	ChIP-seq	sc-229, Santa Cruz
USF1	RadaIglesias	18230803	Liver	HepG2	ChIP-chip	H-86, sc-8983, Santa Cruz
USF2	RadaIglesias	18230803	Liver	HepG2	ChIP-chip	C-20, sc-862, Santa Cruz
VDR	Ramagopalan	20736230	Lymphoblastoid	GM10855	ChIP-seq	sc-1008, Santa Cruz
VDR	Ramagopalan	20736230	Lymphoblastoid	GM10855	ChIP-seq	sc-1008, Santa Cruz
VDR	Ramagopalan	20736230	Lymphoblastoid	GM10855	ChIP-seq	sc-1008, Santa Cruz
VDR	Ramagopalan	20736230	Lymphoblastoid	GM10855	ChIP-seq	sc-1008, Santa Cruz
VDR	Ramagopalan	20736230	Lymphoblastoid	GM10861	ChIP-seq	sc-1008, Santa Cruz
VDR	Ramagopalan	20736230	Lymphoblastoid	GM10861	ChIP-seq	sc-1008, Santa Cruz
VDR	Ramagopalan	20736230	Lymphoblastoid	GM10861	ChIP-seq	sc-1008, Santa Cruz
VDR	Ramagopalan	20736230	Lymphoblastoid	GM10861	ChIP-seq	sc-1008, Santa Cruz
YY1	Yale TFBS Track	ENCODE	B-lymph	GM12878	ChIP-seq	sc-1703X, Santa Cruz
YY1	Yale TFBS Track	ENCODE	Leukemia	K562	ChIP-seq	sc-1703X, Santa Cruz
YY1	Yale TFBS Track	ENCODE	Teratocarcinoma	NT2-D1 (NTera2)	ChIP-seq	sc-1703X, Santa Cruz
ZBTB33	HAIB TFBS Track	ENCODE	B-lymph	GM12878	ChIP-seq	sc-23871, Santa Cruz
ZBTB33	HAIB TFBS Track	ENCODE	B-lymph	GM12878	ChIP-seq	sc-23871, Santa Cruz
ZBTB33	HAIB TFBS Track	ENCODE	Liver	HepG2	ChIP-seq	sc-23871, Santa Cruz
ZBTB33	HAIB TFBS Track	ENCODE	Liver	HepG2	ChIP-seq	sc-23871, Santa Cruz
ZNF263	Yale TFBS Track	ENCODE	Leukemia	K562	ChIP-seq	H00010127-A01, Novus
ZNF274	Yale TFBS Track	ENCODE	Leukemia	K562	ChIP-seq	H00010782-A01, ABNOVA
ZZZ3	Yale TFBS Track	ENCODE	B-lymph	GM12878	ChIP-seq	custom made (Tora, IGBMC)
